# Supplementary material for: A high throughput computational investigation of the solid solution mechanisms of actinides and lanthanides in zirconolite
Source: Royal Society of Chemistry journal article supplement (doi:10.1039/d1ra02914b), 2021-01-01
Supplement: d1ra02914b1.pdf [file d1ra02914b1.pdf]

### $\text{Ca}_{1-x}\text{Ce}_x\text{ZrTi}_{2-2x}\text{Al}_{2x}\text{O}_7$

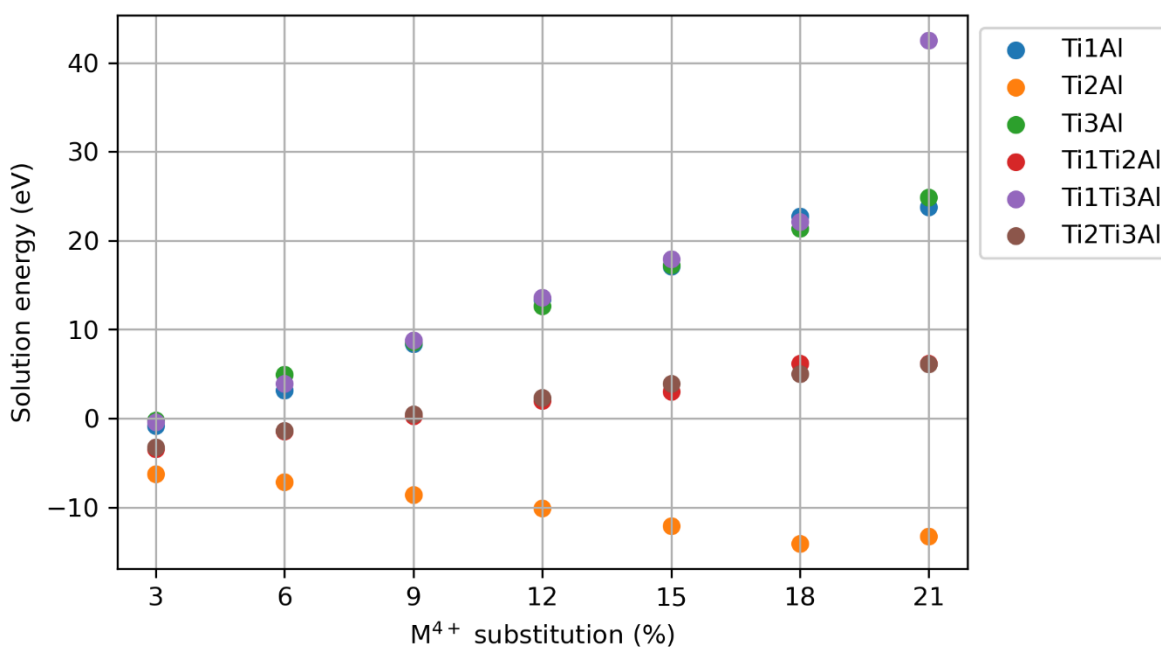

### $\text{Ca}_{1-x}\text{Ce}_x\text{ZrTi}_{2-2x}\text{Fe}_{2x}\text{O}_7$

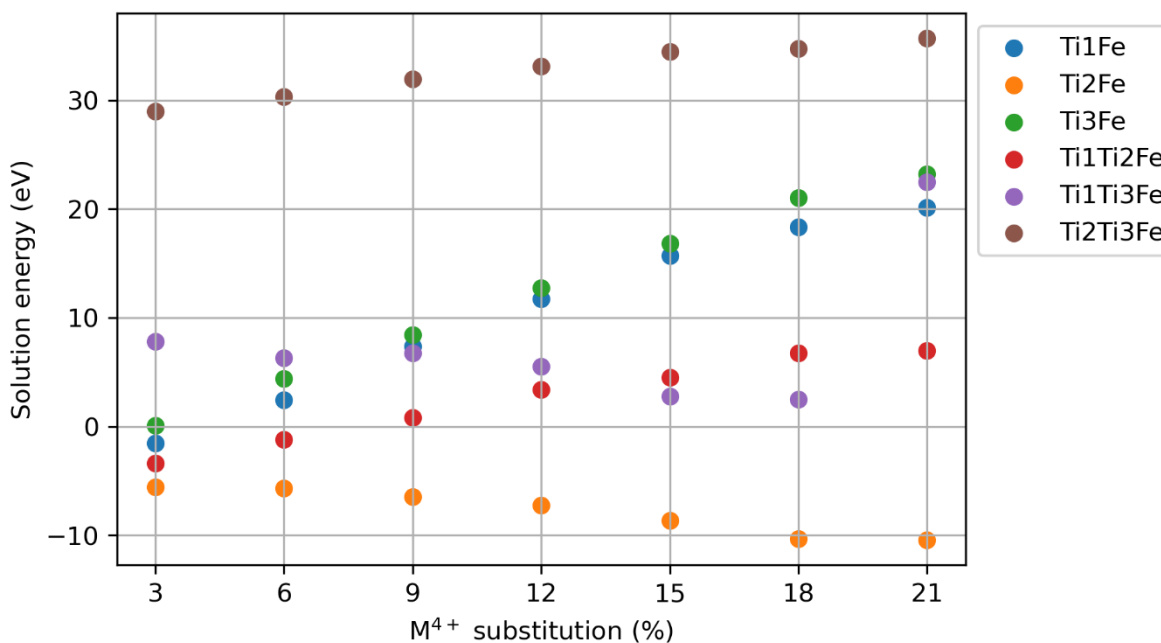

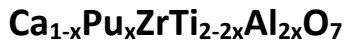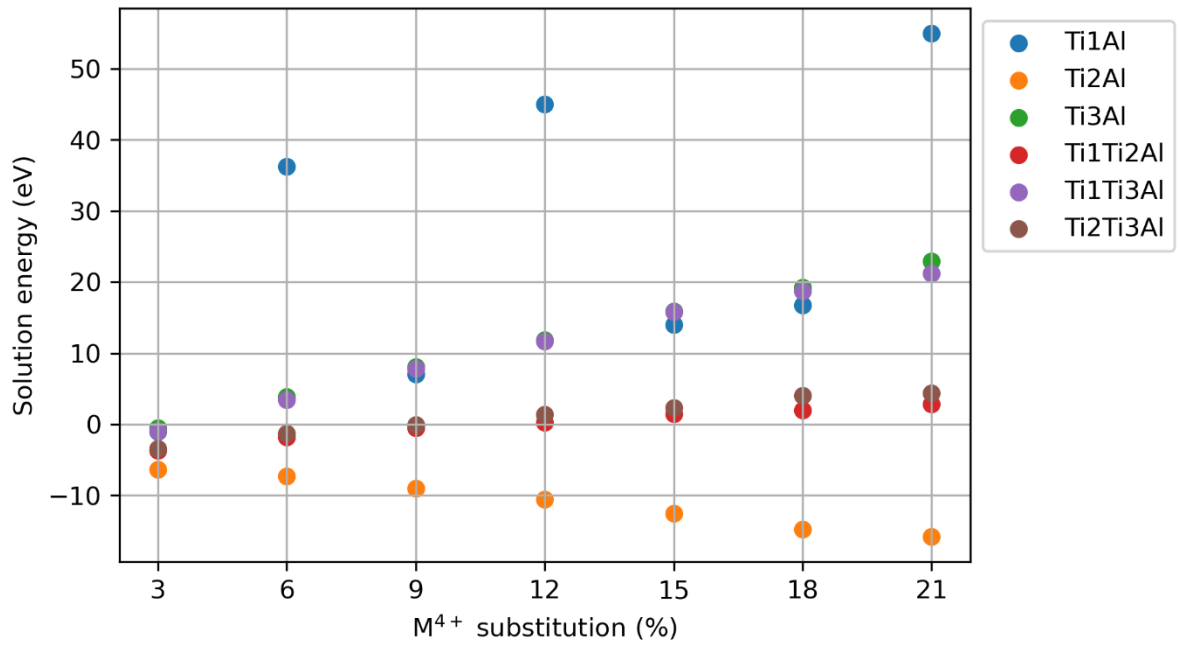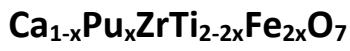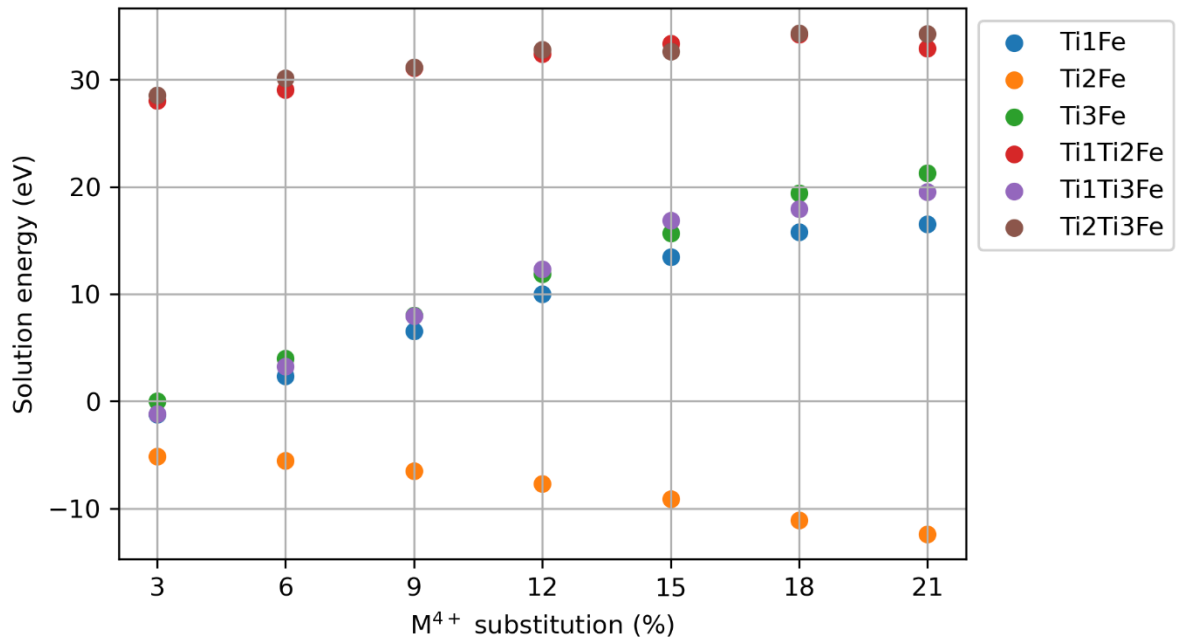

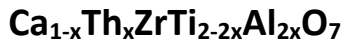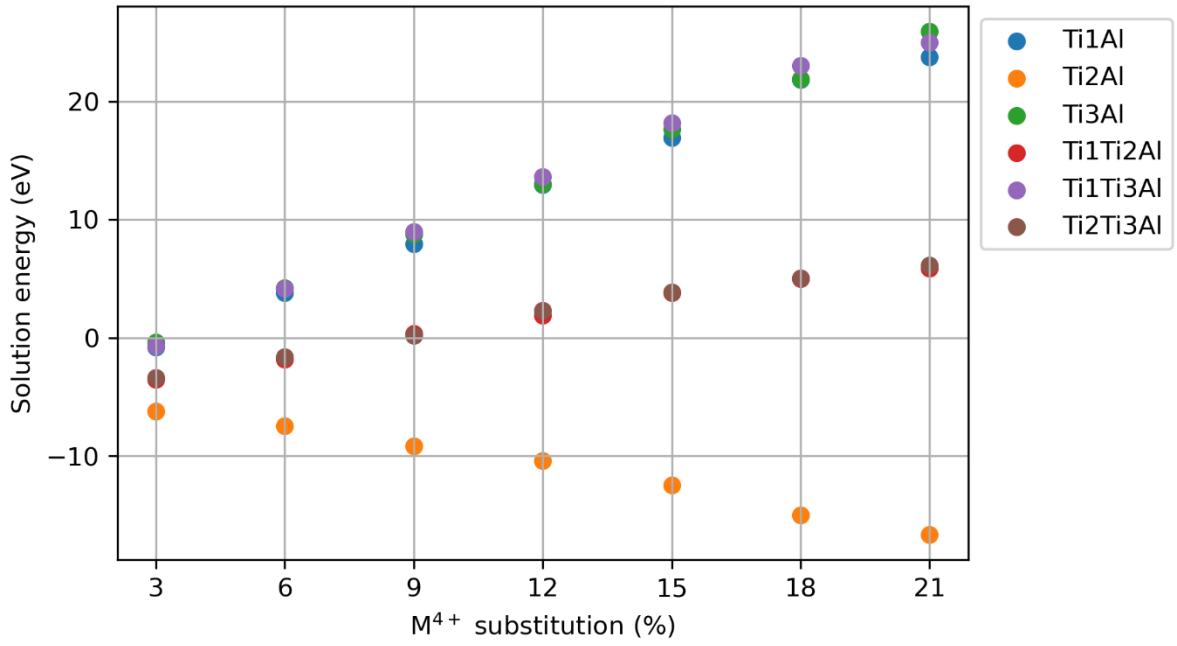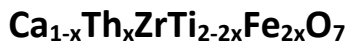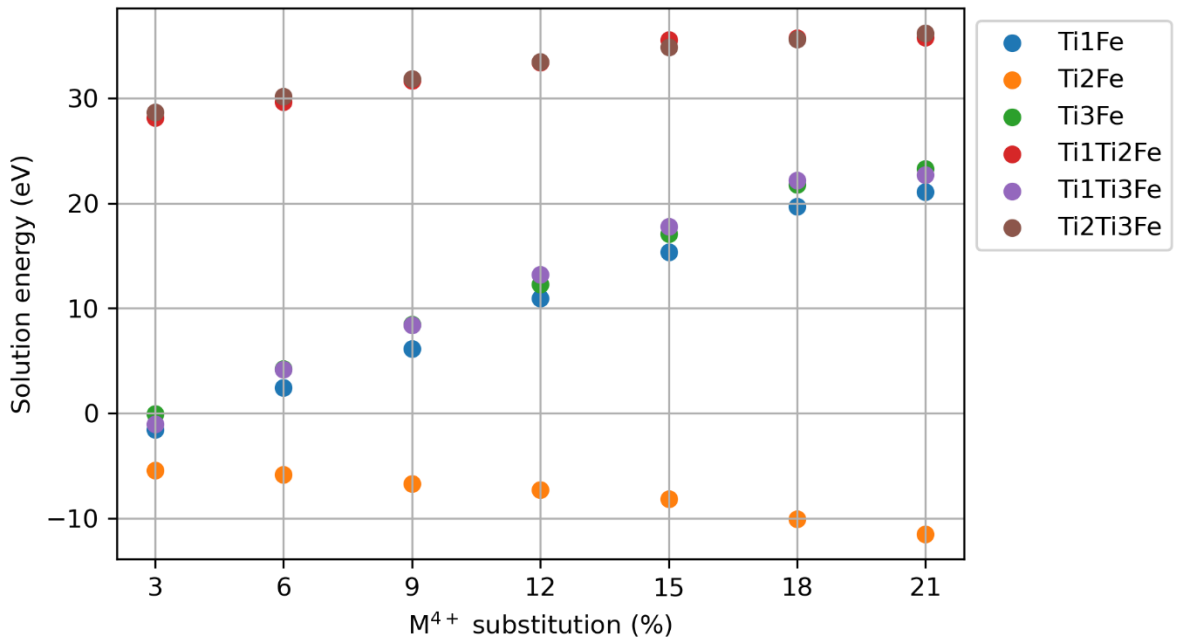

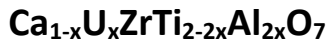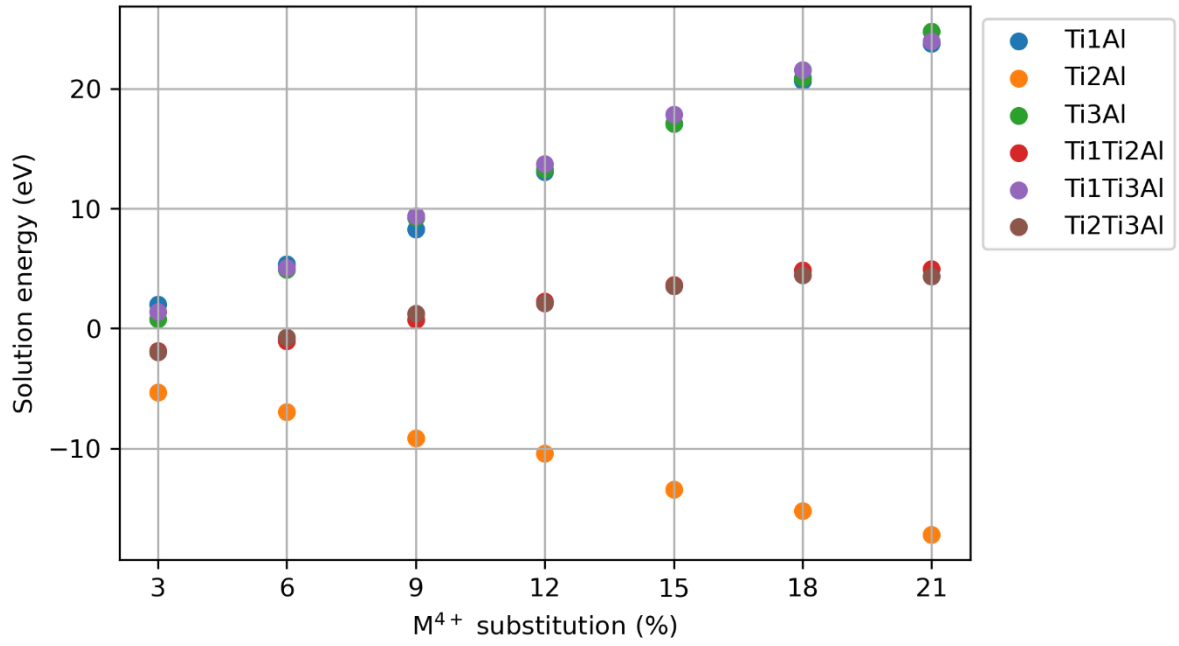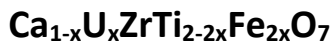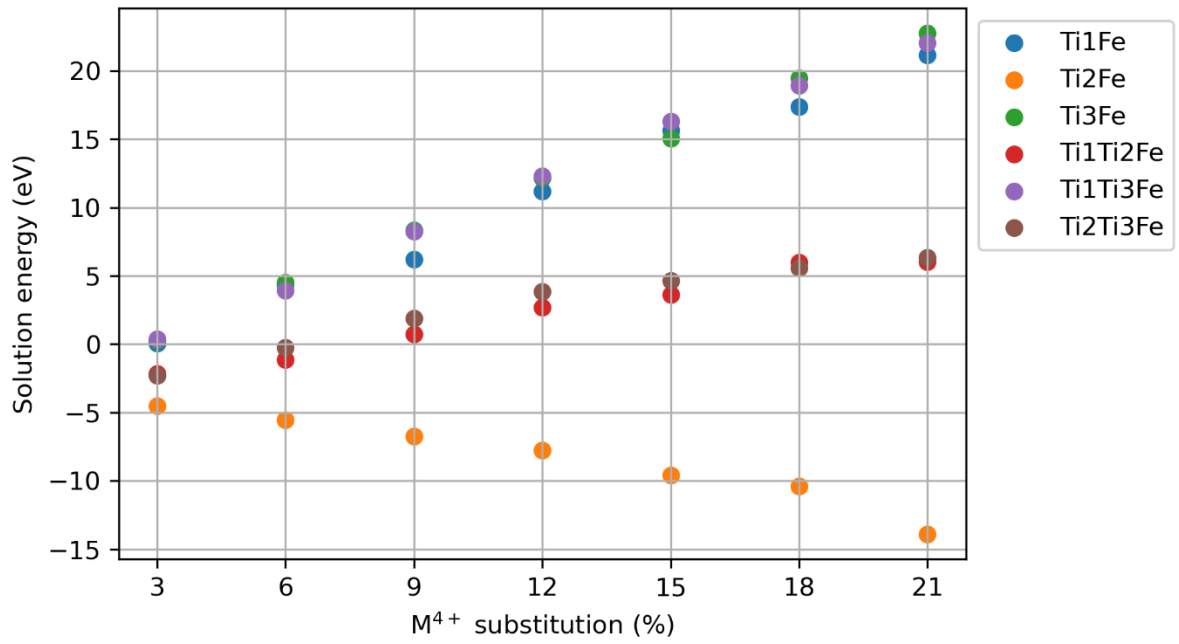

# CaZr<sub>1-x</sub>M<sub>x</sub>Ti<sub>2</sub>O<sub>7</sub>, M = (Ce, Pu, Th, U)

N.B. All stated energies are in eV

| Ce                                  | ground    | solid    |           | ground |           | solid    |           | ground |           | solid    |           | ground |           | solid    |        |
|-------------------------------------|-----------|----------|-----------|--------|-----------|----------|-----------|--------|-----------|----------|-----------|--------|-----------|----------|--------|
|                                     | state     | solution |           | state  |           | solution |           | state  |           | solution |           | state  |           | solution |        |
| energy                              | energy    | energy   | energy    | energy | energy    | energy   | energy    | energy | energy    | energy   | energy    | energy | energy    | energy   | energy |
| concentration in solid solution (%) | 3         | 6        |           | 9      |           | 12       |           | 15     |           | 18       |           | 21     |           |          |        |
| number of atoms                     | 2         | 4        |           | 6      |           | 8        |           | 10     |           | 12       |           | 13     |           |          |        |
|                                     | -25173.43 | -4.67    | -25156.75 | -5.29  | -25139.56 | -5.41    | -25122.93 | -6.09  | -25105.88 | -6.34    | -25089.43 | -7.20  | -25081.07 | -7.50    |        |
|                                     | -25173.31 | -4.55    | -25156.60 | -5.15  | -25139.70 | -5.55    | -25122.75 | -5.91  | -25105.65 | -6.11    | -25089.20 | -6.97  | -25080.98 | -7.40    |        |
|                                     | -25173.42 | -4.67    | -25156.50 | -5.05  | -25139.39 | -5.24    | -25122.98 | -6.14  | -25105.71 | -6.18    | -25088.99 | -6.76  | -25080.76 | -7.19    |        |
|                                     | -25173.30 | -4.55    | -25156.63 | -5.18  | -25139.75 | -5.60    | -25122.77 | -5.93  | -25106.19 | -6.66    | -25089.21 | -6.98  | -25080.74 | -7.16    |        |
|                                     | -25173.33 | -4.57    | -25156.62 | -5.17  | -25139.58 | -5.44    | -25122.98 | -6.14  | -25105.99 | -6.46    | -25089.06 | -6.83  | -25080.28 | -6.71    |        |
|                                     | -25173.44 | -4.68    | -25156.63 | -5.18  | -25139.41 | -5.27    | -25122.62 | -5.78  | -25105.89 | -6.35    | -25089.29 | -7.06  | -25080.97 | -7.39    |        |
|                                     | -25173.52 | -4.77    | -25156.50 | -5.05  | -25139.33 | -5.18    | -25122.62 | -5.78  | -25105.63 | -6.10    | -25089.24 | -7.01  | -25080.07 | -6.49    |        |
|                                     | -25173.55 | -4.79    | -25156.42 | -4.97  | -25139.51 | -5.37    | -25122.75 | -5.91  | -25105.74 | -6.21    | -25089.10 | -6.87  | -25080.83 | -7.26    |        |
|                                     | -25173.42 | -4.67    | -25156.52 | -5.06  | -25139.46 | -5.32    | -25122.75 | -5.91  | -25105.73 | -6.19    | -25089.09 | -6.86  | -25080.81 | -7.23    |        |
|                                     | -25173.30 | -4.55    | -25156.39 | -4.94  | -25139.63 | -5.49    | -25122.64 | -5.79  | -25105.92 | -6.38    | -25089.17 | -6.94  | -25080.31 | -6.73    |        |
|                                     | -25173.30 | -4.55    | -25156.36 | -4.91  | -25139.47 | -5.33    | -25123.07 | -6.23  | -25105.68 | -6.15    | -25088.85 | -6.62  | -25080.25 | -6.67    |        |
|                                     | -25173.42 | -4.66    | -25156.62 | -5.17  | -25139.66 | -5.52    | -25122.38 | -5.54  | -25105.81 | -6.28    | -25089.30 | -7.07  | -25080.79 | -7.21    |        |
|                                     | -25173.30 | -4.54    | -25156.54 | -5.09  | -25139.72 | -5.57    | -25122.40 | -5.56  | -25106.04 | -6.50    | -25089.16 | -6.92  | -25080.70 | -7.12    |        |
|                                     | -25173.42 | -4.67    | -25156.39 | -4.93  | -25139.68 | -5.53    | -25122.88 | -6.04  | -25106.05 | -6.51    | -25088.98 | -6.75  | -25080.54 | -6.96    |        |
|                                     | -25173.44 | -4.68    | -25156.53 | -5.08  | -25139.37 | -5.22    | -25122.62 | -5.78  | -25106.11 | -6.57    | -25089.02 | -6.79  | -25080.48 | -6.90    |        |
|                                     | -25173.43 | -4.67    | -25156.51 | -5.05  | -25139.49 | -5.34    | -25122.85 | -6.01  | -25105.99 | -6.46    | -25089.03 | -6.80  | -25080.59 | -7.02    |        |
|                                     | -25173.42 | -4.67    | -25156.62 | -5.17  | -25139.95 | -5.81    | -25123.12 | -6.28  | -25106.17 | -6.64    | -25089.11 | -6.88  | -25080.58 | -7.00    |        |
|                                     | -25173.44 | -4.68    | -25156.76 | -5.31  | -25139.85 | -5.71    | -25122.42 | -5.58  | -25105.74 | -6.20    | -25088.77 | -6.54  | -25081.10 | -7.52    |        |
|                                     | -25173.54 | -4.79    | -25156.51 | -5.05  | -25139.73 | -5.58    | -25122.67 | -5.83  | -25105.76 | -6.22    | -25088.47 | -6.24  | -25080.67 | -7.10    |        |
|                                     | -25173.42 | -4.67    | -25156.54 | -5.09  | -25139.79 | -5.64    | -25122.59 | -5.75  | -25105.68 | -6.14    | -25089.19 | -6.96  | -25080.64 | -7.06    |        |
|                                     | -25173.31 | -4.55    | -25156.39 | -4.94  | -25139.75 | -5.60    | -25122.76 | -5.92  | -25106.18 | -6.65    | -25088.91 | -6.68  | -25080.72 | -7.14    |        |
|                                     | -25173.41 | -4.65    | -25156.53 | -5.07  | -25139.72 | -5.57    | -25122.83 | -5.98  | -25105.70 | -6.16    | -25089.06 | -6.83  | -25080.32 | -6.74    |        |
|                                     | -25173.42 | -4.67    | -25156.48 | -5.02  | -25139.64 | -5.49    | -25122.56 | -5.72  | -25105.82 | -6.28    | -25089.27 | -7.04  | -25080.65 | -7.08    |        |
|                                     | -25173.30 | -4.55    | -25156.66 | -5.21  | -25139.51 | -5.37    | -25122.75 | -5.91  | -25105.93 | -6.39    | -25089.46 | -7.23  | -25080.69 | -7.11    |        |
|                                     | -25173.54 | -4.79    | -25156.61 | -5.16  | -25139.50 | -5.36    | -25122.66 | -5.81  | -25105.92 | -6.39    | -25088.97 | -6.74  | -25080.66 | -7.08    |        |
|                                     | -25173.42 | -4.66    | -25156.56 | -5.11  | -25139.77 | -5.62    | -25122.74 | -5.90  | -25105.98 | -6.44    | -25088.79 | -6.56  | -25080.83 | -7.26    |        |
|                                     | -25173.31 | -4.55    | -25156.50 | -5.05  | -25139.84 | -5.69    | -25122.76 | -5.92  | -25106.06 | -6.52    | -25089.21 | -6.98  | -25080.89 | -7.31    |        |
|                                     | -25173.54 | -4.79    | -25156.56 | -5.11  | -25139.76 | -5.62    | -25122.86 | -6.02  | -25105.78 | -6.24    | -25089.19 | -6.96  | -25080.98 | -7.40    |        |
|                                     | -25173.54 | -4.78    | -25156.52 | -5.07  | -25139.52 | -5.38    | -25122.80 | -5.96  | -25105.66 | -6.12    | -25089.22 | -6.99  | -25080.47 | -6.90    |        |
|                                     | -25173.31 | -4.55    | -25156.69 | -5.24  | -25139.62 | -5.47    | -25122.77 | -5.93  | -25105.88 | -6.34    | -25089.22 | -6.99  | -25080.48 | -6.90    |        |

# Pu

| Average energies                    | -25173.41           | -4.65                 | -25156.55 | -5.10     | -25139.62 | -5.48     | -25122.74 | -5.90     | -25105.88 | -6.34     | -25089.10 | -6.87     | -25080.66 | -7.08  |
|-------------------------------------|---------------------|-----------------------|-----------|-----------|-----------|-----------|-----------|-----------|-----------|-----------|-----------|-----------|-----------|--------|
|                                     | ground state energy | solid solution energy |           |           |           |           |           |           |           |           |           |           |           |        |
| concentration in solid solution (%) | 3                   | 6                     | 9         | 12        | 15        | 18        | 21        |           |           |           |           |           |           |        |
| number of atoms                     | 2                   | 4                     | 6         | 8         | 10        | 12        | 13        |           |           |           |           |           |           |        |
| -25168.81                           | -6.04               | -25147.09             | -7.61     | -25125.86 | -9.67     | -25104.07 | -11.18    | -25082.77 | -13.16    | -25061.21 | -14.89    | -25050.48 | -15.81    |        |
| -25168.89                           | -6.12               | -25147.26             | -7.78     | -25125.79 | -9.60     | -25104.25 | -11.36    | -25082.76 | -13.15    | -25061.00 | -14.68    | -25050.81 | -16.14    |        |
| -25168.81                           | -6.03               | -25147.24             | -7.76     | -25125.92 | -9.73     | -25104.04 | -11.14    | -25083.06 | -13.45    | -25061.38 | -15.07    | -25050.45 | -15.78    |        |
| -25168.89                           | -6.12               | -25147.18             | -7.70     | -25125.67 | -9.48     | -25104.27 | -11.37    | -25082.97 | -13.36    | -25061.25 | -14.94    | -25050.18 | -15.50    |        |
| -25168.92                           | -6.15               | -25147.17             | -7.69     | -25125.68 | -9.49     | -25104.08 | -11.18    | -25083.00 | -13.39    | -25061.44 | -15.12    | -25050.56 | -15.89    |        |
| -25168.81                           | -6.04               | -25147.13             | -7.65     | -25125.64 | -9.45     | -25104.25 | -11.35    | -25082.96 | -13.35    | -25061.51 | -15.20    | -25050.62 | -15.95    |        |
| -25168.85                           | -6.08               | -25147.26             | -7.78     | -25125.75 | -9.56     | -25104.24 | -11.34    | -25082.87 | -13.26    | -25061.44 | -15.12    | -25050.59 | -15.92    |        |
| -25168.73                           | -5.96               | -25147.38             | -7.90     | -25125.86 | -9.67     | -25104.19 | -11.29    | -25082.83 | -13.22    | -25061.40 | -15.09    | -25051.08 | -16.41    |        |
| -25168.80                           | -6.03               | -25147.29             | -7.81     | -25125.96 | -9.77     | -25104.43 | -11.53    | -25082.79 | -13.18    | -25061.03 | -14.71    | -25050.68 | -16.01    |        |
| -25168.89                           | -6.12               | -25147.39             | -7.91     | -25125.65 | -9.46     | -25104.29 | -11.39    | -25083.00 | -13.39    | -25061.26 | -14.94    | -25050.37 | -15.70    |        |
| -25168.89                           | -6.12               | -25147.44             | -7.96     | -25126.08 | -9.89     | -25104.12 | -11.23    | -25083.04 | -13.43    | -25061.72 | -15.40    | -25050.93 | -16.26    |        |
| -25168.81                           | -6.04               | -25147.17             | -7.69     | -25125.76 | -9.57     | -25104.49 | -11.59    | -25083.20 | -13.59    | -25061.09 | -14.77    | -25050.60 | -15.93    |        |
| -25168.89                           | -6.12               | -25147.28             | -7.80     | -25125.53 | -9.34     | -25104.68 | -11.78    | -25082.67 | -13.06    | -25061.04 | -14.72    | -25051.07 | -16.40    |        |
| -25168.80                           | -6.03               | -25147.33             | -7.85     | -25125.89 | -9.70     | -25104.13 | -11.23    | -25082.66 | -13.05    | -25061.15 | -14.83    | -25050.71 | -16.04    |        |
| -25168.82                           | -6.05               | -25147.30             | -7.82     | -25125.94 | -9.75     | -25104.17 | -11.27    | -25082.86 | -13.25    | -25061.63 | -15.32    | -25050.66 | -15.98    |        |
| -25168.80                           | -6.03               | -25147.25             | -7.77     | -25125.91 | -9.72     | -25104.03 | -11.13    | -25082.89 | -13.29    | -25061.24 | -14.92    | -25050.63 | -15.96    |        |
| -25168.80                           | -6.03               | -25147.18             | -7.70     | -25125.66 | -9.47     | -25104.18 | -11.28    | -25082.87 | -13.26    | -25061.21 | -14.89    | -25050.77 | -16.09    |        |
| -25168.81                           | -6.04               | -25147.13             | -7.65     | -25125.54 | -9.35     | -25104.58 | -11.68    | -25082.80 | -13.20    | -25061.52 | -15.21    | -25050.24 | -15.57    |        |
| -25168.73                           | -5.96               | -25147.22             | -7.73     | -25125.59 | -9.40     | -25104.31 | -11.41    | -25082.78 | -13.17    | -25061.45 | -15.13    | -25050.73 | -16.05    |        |
| -25168.81                           | -6.04               | -25147.29             | -7.81     | -25125.71 | -9.52     | -25104.23 | -11.33    | -25083.05 | -13.44    | -25061.21 | -14.89    | -25050.91 | -16.24    |        |
| -25168.87                           | -6.09               | -25147.37             | -7.89     | -25125.58 | -9.39     | -25104.25 | -11.35    | -25082.93 | -13.32    | -25061.37 | -15.06    | -25050.58 | -15.91    |        |
| -25168.80                           | -6.03               | -25147.27             | -7.79     | -25125.69 | -9.50     | -25104.13 | -11.23    | -25082.83 | -13.23    | -25061.61 | -15.29    | -25050.56 | -15.88    |        |
| -25168.80                           | -6.03               | -25147.17             | -7.69     | -25125.80 | -9.61     | -25104.20 | -11.30    | -25082.66 | -13.05    | -25061.25 | -14.94    | -25050.63 | -15.96    |        |
| -25168.89                           | -6.12               | -25147.18             | -7.70     | -25125.87 | -9.68     | -25104.21 | -11.31    | -25082.85 | -13.25    | -25061.16 | -14.84    | -25050.81 | -16.14    |        |
| -25168.73                           | -5.96               | -25147.15             | -7.67     | -25125.83 | -9.64     | -25104.33 | -11.43    | -25082.93 | -13.32    | -25061.55 | -15.23    | -25050.45 | -15.78    |        |
| -25168.79                           | -6.02               | -25147.32             | -7.84     | -25125.80 | -9.61     | -25104.23 | -11.33    | -25082.94 | -13.33    | -25061.49 | -15.18    | -25050.82 | -16.15    |        |
| -25168.89                           | -6.12               | -25147.25             | -7.77     | -25125.64 | -9.45     | -25104.31 | -11.41    | -25082.74 | -13.13    | -25061.13 | -14.81    | -25050.48 | -15.81    |        |
| -25168.73                           | -5.96               | -25147.31             | -7.83     | -25125.67 | -9.48     | -25104.33 | -11.43    | -25083.29 | -13.68    | -25061.58 | -15.26    | -25050.44 | -15.77    |        |
| -25168.72                           | -5.95               | -25147.27             | -7.79     | -25125.94 | -9.75     | -25104.25 | -11.35    | -25083.05 | -13.44    | -25061.45 | -15.13    | -25050.51 | -15.84    |        |
| -25168.90                           | -6.13               | -25147.11             | -7.63     | -25125.88 | -9.69     | -25104.22 | -11.32    | -25082.90 | -13.29    | -25061.45 | -15.14    | -25050.86 | -16.19    |        |
| Average energies                    | -25168.82           | -6.05                 | -25147.25 | -7.77     | -25125.77 | -9.58     | -25104.25 | -11.35    | -25082.90 | -13.29    | -25061.34 | -15.02    | -25050.64 | -15.97 |

# Th

ground state energy    solid solution energy

| concentration in solid solution (%) | 3         | 6         | 9         | 12        | 15        | 18        | 21        |           |           |           |           |           |           |      |
|-------------------------------------|-----------|-----------|-----------|-----------|-----------|-----------|-----------|-----------|-----------|-----------|-----------|-----------|-----------|------|
| number of atoms                     | 2         | 4         | 6         | 8         | 10        | 12        | 13        |           |           |           |           |           |           |      |
| -25171.40                           | -3.00     | -25153.09 | -2.35     | -25133.57 | -0.49     | -25115.39 | 0.03      | -25096.14 | 1.62      | -25078.38 | 1.72      | -25068.31 | 2.96      |      |
| -25171.12                           | -2.71     | -25152.73 | -1.99     | -25133.89 | -0.81     | -25114.88 | 0.54      | -25096.16 | 1.60      | -25078.15 | 1.95      | -25069.11 | 2.16      |      |
| -25171.39                           | -2.99     | -25152.55 | -1.80     | -25133.55 | -0.47     | -25115.45 | -0.03     | -25095.55 | 2.21      | -25078.25 | 1.85      | -25069.25 | 2.02      |      |
| -25171.09                           | -2.69     | -25152.84 | -2.10     | -25134.03 | -0.95     | -25115.16 | 0.26      | -25095.84 | 1.92      | -25077.49 | 2.61      | -25068.20 | 3.07      |      |
| -25171.15                           | -2.75     | -25152.79 | -2.05     | -25133.61 | -0.53     | -25115.53 | -0.11     | -25096.22 | 1.54      | -25077.84 | 2.26      | -25068.59 | 2.68      |      |
| -25171.46                           | -3.05     | -25152.82 | -2.08     | -25133.21 | -0.13     | -25114.46 | 0.96      | -25095.84 | 1.92      | -25078.17 | 1.93      | -25068.77 | 2.50      |      |
| -25171.64                           | -3.24     | -25152.31 | -1.57     | -25133.00 | 0.08      | -25114.74 | 0.68      | -25096.96 | 0.80      | -25078.05 | 2.05      | -25068.30 | 2.97      |      |
| -25171.71                           | -3.31     | -25152.26 | -1.52     | -25133.43 | -0.35     | -25115.15 | 0.27      | -25096.23 | 1.53      | -25078.64 | 1.46      | -25068.87 | 2.40      |      |
| -25171.40                           | -2.99     | -25152.52 | -1.78     | -25133.36 | -0.28     | -25114.58 | 0.84      | -25096.91 | 0.85      | -25076.74 | 3.36      | -25068.01 | 3.26      |      |
| -25171.09                           | -2.69     | -25152.19 | -1.45     | -25133.81 | -0.73     | -25114.68 | 0.74      | -25096.47 | 1.29      | -25077.21 | 2.89      | -25068.67 | 2.60      |      |
| -25171.09                           | -2.69     | -25152.23 | -1.49     | -25133.29 | -0.21     | -25115.83 | -0.41     | -25095.82 | 1.94      | -25077.15 | 2.95      | -25069.29 | 1.98      |      |
| -25171.38                           | -2.98     | -25152.80 | -2.06     | -25133.60 | -0.52     | -25114.13 | 1.29      | -25096.82 | 0.94      | -25077.73 | 2.37      | -25068.15 | 3.12      |      |
| -25171.06                           | -2.66     | -25152.61 | -1.86     | -25134.00 | -0.92     | -25114.37 | 1.06      | -25095.74 | 2.02      | -25077.88 | 2.22      | -25068.66 | 2.61      |      |
| -25171.40                           | -3.00     | -25152.19 | -1.45     | -25133.80 | -0.72     | -25115.32 | 0.10      | -25096.30 | 1.46      | -25077.32 | 2.78      | -25068.40 | 2.87      |      |
| -25171.46                           | -3.06     | -25152.58 | -1.84     | -25133.15 | -0.06     | -25114.73 | 0.69      | -25096.58 | 1.18      | -25077.84 | 2.26      | -25067.37 | 3.90      |      |
| -25171.42                           | -3.02     | -25152.10 | -1.36     | -25133.37 | -0.29     | -25115.23 | 0.19      | -25096.34 | 1.42      | -25077.84 | 2.26      | -25068.65 | 2.62      |      |
| -25171.40                           | -3.00     | -25152.80 | -2.06     | -25134.50 | -1.42     | -25115.90 | -0.48     | -25096.24 | 1.52      | -25077.44 | 2.66      | -25067.81 | 3.46      |      |
| -25171.44                           | -3.04     | -25153.12 | -2.38     | -25134.10 | -1.01     | -25114.39 | 1.03      | -25096.45 | 1.31      | -25077.15 | 2.95      | -25068.19 | 3.08      |      |
| -25171.70                           | -3.30     | -25152.54 | -1.80     | -25133.99 | -0.91     | -25115.30 | 0.12      | -25096.03 | 1.73      | -25077.84 | 2.26      | -25068.10 | 3.17      |      |
| -25171.40                           | -3.00     | -25152.62 | -1.88     | -25134.17 | -1.09     | -25114.69 | 0.73      | -25096.04 | 1.72      | -25078.57 | 1.53      | -25068.10 | 3.17      |      |
| -25171.11                           | -2.71     | -25152.01 | -1.27     | -25134.11 | -1.03     | -25114.98 | 0.44      | -25096.66 | 1.10      | -25077.17 | 2.93      | -25069.05 | 2.22      |      |
| -25171.34                           | -2.94     | -25152.56 | -1.82     | -25133.73 | -0.65     | -25115.25 | 0.17      | -25096.85 | 0.91      | -25077.74 | 2.36      | -25068.59 | 2.68      |      |
| -25171.40                           | -3.00     | -25152.46 | -1.71     | -25133.73 | -0.65     | -25114.42 | 1.00      | -25095.37 | 2.39      | -25078.58 | 1.52      | -25068.93 | 2.34      |      |
| -25171.09                           | -2.69     | -25152.94 | -2.20     | -25133.22 | -0.14     | -25114.92 | 0.50      | -25096.80 | 0.97      | -25077.83 | 2.27      | -25068.51 | 2.76      |      |
| -25171.70                           | -3.30     | -25152.77 | -2.03     | -25133.39 | -0.30     | -25114.56 | 0.86      | -25096.30 | 1.46      | -25077.73 | 2.37      | -25067.74 | 3.53      |      |
| -25171.39                           | -2.99     | -25152.67 | -1.93     | -25134.01 | -0.93     | -25115.05 | 0.37      | -25096.23 | 1.53      | -25077.57 | 2.53      | -25067.53 | 3.74      |      |
| -25171.10                           | -2.70     | -25152.47 | -1.73     | -25134.25 | -1.17     | -25114.86 | 0.56      | -25095.87 | 1.89      | -25077.19 | 2.91      | -25068.50 | 2.77      |      |
| -25171.70                           | -3.30     | -25152.66 | -1.92     | -25134.04 | -0.96     | -25115.53 | -0.11     | -25096.45 | 1.31      | -25076.82 | 3.28      | -25068.74 | 2.53      |      |
| -25171.69                           | -3.28     | -25152.54 | -1.80     | -25134.11 | -1.03     | -25115.17 | 0.25      | -25096.23 | 1.53      | -25077.76 | 2.34      | -25068.39 | 2.88      |      |
| -25171.11                           | -2.71     | -25152.95 | -2.21     | -25133.68 | -0.60     | -25115.05 | 0.37      | -25096.85 | 0.91      | -25078.05 | 2.05      | -25068.79 | 2.48      |      |
| Average energies                    | -25171.36 | -2.96     | -25152.59 | -1.85     | -25133.72 | -0.64     | -25114.99 | 0.43      | -25096.28 | 1.48      | -25077.74 | 2.36      | -25068.45 | 2.82 |

# U

ground state energy    solid solution energy

| concentration in solid solution (%) | 3         | 6         | 9         | 12        | 15        | 18        | 21        |           |           |           |           |           |           |        |
|-------------------------------------|-----------|-----------|-----------|-----------|-----------|-----------|-----------|-----------|-----------|-----------|-----------|-----------|-----------|--------|
| number of atoms                     | 2         | 4         | 6         | 8         | 10        | 12        | 13        |           |           |           |           |           |           |        |
| -25179.58                           | -8.07     | -25169.23 | -12.28    | -25157.96 | -15.57    | -25147.73 | -19.89    | -25124.00 | -10.72    | -25110.94 | -12.21    | -25103.46 | -12.01    |        |
| -25179.38                           | -7.87     | -25168.99 | -12.04    | -25158.25 | -15.86    | -25147.43 | -19.59    | -25124.06 | -10.78    | -25111.33 | -12.60    | -25103.99 | -12.54    |        |
| -25179.57                           | -8.07     | -25168.82 | -11.87    | -25157.70 | -15.31    | -25147.82 | -19.98    | -25124.32 | -11.03    | -25111.17 | -12.44    | -25104.00 | -12.55    |        |
| -25179.37                           | -7.86     | -25169.04 | -12.09    | -25158.31 | -15.92    | -25147.49 | -19.65    | -25124.01 | -10.72    | -25111.01 | -12.28    | -25104.76 | -13.31    |        |
| -25179.39                           | -7.88     | -25169.02 | -12.07    | -25158.06 | -15.66    | -25147.80 | -19.96    | -25123.86 | -10.57    | -25110.17 | -11.45    | -25104.63 | -13.18    |        |
| -25179.60                           | -8.09     | -25169.03 | -12.08    | -25157.81 | -15.42    | -25147.20 | -19.36    | -25123.36 | -10.08    | -25111.16 | -12.44    | -25104.77 | -13.32    |        |
| -25179.76                           | -8.25     | -25168.81 | -11.86    | -25157.64 | -15.25    | -25147.18 | -19.34    | -25123.85 | -10.57    | -25110.46 | -11.74    | -25104.42 | -12.97    |        |
| -25179.79                           | -8.28     | -25168.65 | -11.70    | -25157.90 | -15.51    | -25147.41 | -19.57    | -25123.67 | -10.39    | -25110.68 | -11.95    | -25104.37 | -12.93    |        |
| -25179.57                           | -8.07     | -25168.82 | -11.87    | -25157.87 | -15.48    | -25147.41 | -19.58    | -25123.91 | -10.63    | -25110.87 | -12.15    | -25104.39 | -12.95    |        |
| -25179.37                           | -7.86     | -25168.61 | -11.66    | -25158.14 | -15.75    | -25147.20 | -19.36    | -25123.78 | -10.50    | -25111.13 | -12.40    | -25104.61 | -13.16    |        |
| -25179.37                           | -7.86     | -25168.62 | -11.67    | -25157.90 | -15.51    | -25147.91 | -20.07    | -25123.83 | -10.54    | -25110.47 | -11.74    | -25103.95 | -12.51    |        |
| -25179.57                           | -8.06     | -25169.02 | -12.07    | -25158.15 | -15.76    | -25146.88 | -19.05    | -25124.10 | -10.82    | -25110.07 | -11.34    | -25104.46 | -13.01    |        |
| -25179.36                           | -7.85     | -25168.86 | -11.91    | -25158.30 | -15.91    | -25146.80 | -18.96    | -25123.68 | -10.40    | -25110.86 | -12.13    | -25104.58 | -13.13    |        |
| -25179.58                           | -8.07     | -25168.60 | -11.65    | -25158.21 | -15.82    | -25147.63 | -19.80    | -25123.59 | -10.31    | -25110.91 | -12.18    | -25104.27 | -12.82    |        |
| -25179.60                           | -8.09     | -25168.84 | -11.89    | -25157.72 | -15.33    | -25147.21 | -19.37    | -25123.84 | -10.56    | -25110.52 | -11.80    | -25103.79 | -12.34    |        |
| -25179.58                           | -8.08     | -25168.82 | -11.87    | -25157.86 | -15.47    | -25147.59 | -19.76    | -25123.44 | -10.16    | -25111.16 | -12.43    | -25104.18 | -12.73    |        |
| -25179.58                           | -8.07     | -25169.02 | -12.07    | -25158.67 | -16.28    | -25148.03 | -20.20    | -25124.20 | -10.92    | -25111.45 | -12.73    | -25104.12 | -12.67    |        |
| -25179.60                           | -8.09     | -25169.24 | -12.29    | -25158.52 | -16.12    | -25146.92 | -19.09    | -25123.93 | -10.65    | -25110.40 | -11.68    | -25104.11 | -12.66    |        |
| -25179.78                           | -8.28     | -25168.83 | -11.88    | -25158.30 | -15.91    | -25147.30 | -19.47    | -25123.76 | -10.48    | -25110.38 | -11.66    | -25105.07 | -13.62    |        |
| -25179.58                           | -8.07     | -25168.87 | -11.92    | -25158.37 | -15.98    | -25147.18 | -19.35    | -25123.11 | -9.83     | -25110.71 | -11.98    | -25104.98 | -13.53    |        |
| -25179.37                           | -7.87     | -25168.60 | -11.65    | -25158.34 | -15.95    | -25147.41 | -19.57    | -25124.24 | -10.96    | -25110.55 | -11.83    | -25104.03 | -12.59    |        |
| -25179.55                           | -8.05     | -25168.84 | -11.89    | -25158.29 | -15.90    | -25147.60 | -19.76    | -25124.11 | -10.83    | -25110.59 | -11.86    | -25104.18 | -12.74    |        |
| -25179.58                           | -8.07     | -25168.80 | -11.85    | -25158.11 | -15.71    | -25147.10 | -19.26    | -25124.16 | -10.88    | -25110.95 | -12.22    | -25104.08 | -12.64    |        |
| -25179.37                           | -7.86     | -25169.08 | -12.13    | -25157.91 | -15.51    | -25147.38 | -19.54    | -25124.22 | -10.94    | -25110.55 | -11.83    | -25103.54 | -12.09    |        |
| -25179.78                           | -8.28     | -25169.01 | -12.06    | -25157.88 | -15.49    | -25147.22 | -19.38    | -25123.84 | -10.56    | -25110.85 | -12.13    | -25104.55 | -13.10    |        |
| -25179.57                           | -8.07     | -25168.88 | -11.93    | -25158.37 | -15.98    | -25147.40 | -19.56    | -25124.61 | -11.33    | -25111.08 | -12.35    | -25103.57 | -12.12    |        |
| -25179.37                           | -7.87     | -25168.80 | -11.85    | -25158.48 | -16.09    | -25147.46 | -19.63    | -25123.88 | -10.60    | -25111.32 | -12.60    | -25104.35 | -12.91    |        |
| -25179.78                           | -8.28     | -25168.88 | -11.93    | -25158.31 | -15.92    | -25147.58 | -19.74    | -25124.33 | -11.04    | -25110.53 | -11.81    | -25104.46 | -13.01    |        |
| -25179.78                           | -8.27     | -25168.83 | -11.88    | -25157.94 | -15.54    | -25147.48 | -19.64    | -25123.34 | -10.06    | -25111.26 | -12.54    | -25104.03 | -12.58    |        |
| -25179.37                           | -7.87     | -25169.17 | -12.22    | -25158.08 | -15.69    | -25147.42 | -19.59    | -25123.59 | -10.31    | -25110.97 | -12.25    | -25104.22 | -12.78    |        |
| Average energies                    | -25179.55 | -8.04     | -25168.89 | -11.94    | -25158.11 | -15.72    | -25147.41 | -19.57    | -25123.89 | -10.61    | -25110.82 | -12.09    | -25104.26 | -12.82 |



# Ca<sub>1-x</sub>M<sub>x</sub>ZrTi<sub>2-2x</sub>Al<sub>2x</sub>O<sub>7</sub> M=(Ce, Pu, Th, U)

## Ti(1)Ti(1)

N.B. All stated energies are in eV

| Ce                                  | ground | solid     |        | ground    |        | solid     |        | ground    |        | solid     |        | ground    |        | solid    |        |
|-------------------------------------|--------|-----------|--------|-----------|--------|-----------|--------|-----------|--------|-----------|--------|-----------|--------|----------|--------|
|                                     | state  | solution  |        | state     |        | solution  |        | state     |        | solution  |        | state     |        | solution |        |
| energy                              | energy | energy    | energy | energy    | energy | energy    | energy | energy    | energy | energy    | energy | energy    | energy | energy   | energy |
| concentration in solid solution (%) | 3      | 6         |        | 9         |        | 12        |        | 15        |        | 18        |        | 21        |        |          |        |
| number of atoms                     | 2      | 4         |        | 6         |        | 8         |        | 10        |        | 12        |        | 13        |        |          |        |
| -25153.88                           | -0.50  | -25116.21 | 4.49   | -25077.28 | 10.73  | -25041.73 | 13.60  | -25005.68 | 16.97  | -24972.58 | 17.39  | -24947.74 | 25.89  |          |        |
| -25153.62                           | -0.24  | -25115.75 | 4.95   | -25074.65 | 13.36  | -25042.13 | 13.20  | -25005.94 | 16.72  | -24970.31 | 19.66  | -24948.15 | 25.47  |          |        |
| -25153.41                           | -0.03  | -25116.28 | 4.42   | -25079.60 | 8.41   | -25040.27 | 15.07  | -25006.49 | 16.16  | -24968.04 | 21.93  | -24949.87 | 23.76  |          |        |
| -25153.91                           | -0.53  | -25117.13 | 3.57   | -25077.47 | 10.55  | -25044.98 | 10.35  | -25006.18 | 16.47  | -24969.26 | 20.70  | -24948.70 | 24.93  |          |        |
| -25152.93                           | 0.45   | -25116.77 | 3.93   | -25074.21 | 13.80  | -25043.90 | 11.44  | -25002.45 | 20.20  | -24967.26 | 22.70  | -24951.58 | 22.04  |          |        |
| -25154.18                           | -0.80  | -25118.77 | 1.93   | -25081.03 | 6.99   | -25039.01 | 16.33  | -25005.88 | 16.77  | -24969.64 | 20.33  | -24943.61 | 30.02  |          |        |
| -25153.36                           | 0.02   | -25113.58 | 7.12   | -25081.65 | 6.37   | -25041.03 | 14.31  | -25007.47 | 15.19  | -24967.13 | 22.84  | -24950.04 | 23.59  |          |        |
| -25155.23                           | -1.85  | -25119.14 | 1.56   | -25080.46 | 7.55   | -25037.95 | 17.39  | -25004.77 | 17.88  | -24972.02 | 17.95  | -24953.35 | 20.28  |          |        |
| -25153.84                           | -0.46  | -25118.47 | 2.23   | -25078.25 | 9.77   | -25041.54 | 13.79  | -25003.61 | 19.04  | -24967.08 | 22.89  | -24954.37 | 19.25  |          |        |
| -25153.46                           | -0.08  | -25115.30 | 5.40   | -25082.14 | 5.88   | -25043.12 | 12.22  | -25005.45 | 17.20  | -24962.90 | 27.07  | -24950.32 | 23.31  |          |        |
| -25154.90                           | -1.52  | -25113.53 | 7.17   | -25076.69 | 11.32  | -25040.76 | 14.58  | -25008.33 | 14.32  | -24967.15 | 22.82  | -24950.41 | 23.22  |          |        |
| -25153.90                           | -0.52  | -25118.06 | 2.64   | -25081.21 | 6.81   | -25043.68 | 11.65  | -25006.15 | 16.50  | -24971.98 | 17.99  | -24950.06 | 23.57  |          |        |
| -25154.73                           | -1.35  | -25116.72 | 3.98   | -25078.92 | 9.09   | -25039.63 | 15.71  | -25007.75 | 14.90  | -24967.36 | 22.61  | -24950.84 | 22.79  |          |        |
| -25155.16                           | -1.78  | -25116.91 | 3.79   | -25079.23 | 8.78   | -25043.91 | 11.43  | -25008.33 | 14.32  | -24968.35 | 21.62  | -24945.63 | 27.99  |          |        |
| -25154.95                           | -1.57  | -25116.64 | 4.06   | -25077.76 | 10.26  | -25043.06 | 12.27  | -25004.79 | 17.86  | -24971.07 | 18.90  | -24949.46 | 24.17  |          |        |
| -25154.55                           | -1.17  | -25118.30 | 2.40   | -25078.01 | 10.00  | -25043.44 | 11.90  | -25002.81 | 19.84  | -24965.47 | 24.50  | -24951.86 | 21.77  |          |        |
| -25153.12                           | 0.26   | -25116.43 | 4.27   | -25080.45 | 7.57   | -25042.74 | 12.59  | -25005.67 | 16.98  | -24969.60 | 20.37  | -24948.66 | 24.97  |          |        |
| -25152.86                           | 0.52   | -25116.46 | 4.24   | -25077.82 | 10.20  | -25041.20 | 14.13  | -25007.45 | 15.20  | -24970.38 | 19.59  | -24948.94 | 24.69  |          |        |
| -25153.05                           | 0.33   | -25119.62 | 1.08   | -25078.21 | 9.81   | -25039.86 | 15.48  | -25004.87 | 17.79  | -24969.46 | 20.51  | -24949.12 | 24.51  |          |        |
| -25155.45                           | -2.07  | -25116.75 | 3.95   | -25076.23 | 11.78  | -25044.02 | 11.32  | -25001.91 | 20.74  | -24971.54 | 18.43  | -24952.96 | 20.67  |          |        |
| -25153.76                           | -0.38  | -25115.92 | 4.78   | -25079.39 | 8.63   | -25039.76 | 15.58  | -25005.56 | 17.09  | -24965.96 | 24.01  | -24953.36 | 20.27  |          |        |
| -25154.41                           | -1.03  | -25116.84 | 3.86   | -25080.61 | 7.40   | -25045.87 | 9.46   | -25007.60 | 15.05  | -24967.88 | 22.09  | -24950.83 | 22.80  |          |        |
| -25153.45                           | -0.07  | -25116.73 | 3.97   | -25079.49 | 8.52   | -25040.32 | 15.02  | -25004.30 | 18.36  | -24968.49 | 21.47  | -24947.95 | 25.68  |          |        |
| -25154.37                           | -0.99  | -25117.80 | 2.90   | -25080.35 | 7.67   | -25043.08 | 12.26  | -25004.42 | 18.24  | -24966.26 | 23.71  | -24949.80 | 23.82  |          |        |
| -25153.87                           | -0.49  | -25114.83 | 5.86   | -25079.20 | 8.81   | -25040.37 | 14.96  | -25008.18 | 14.47  | -24970.48 | 19.48  | -24950.14 | 23.48  |          |        |
| -25154.13                           | -0.75  | -25117.29 | 3.40   | -25078.68 | 9.34   | -25042.15 | 13.18  | -25005.29 | 17.36  | -24971.79 | 18.18  | -24946.87 | 26.76  |          |        |
| -25154.09                           | -0.71  | -25117.34 | 3.35   | -25081.21 | 6.81   | -25041.04 | 14.30  | -25004.25 | 18.40  | -24969.68 | 20.29  | -24950.80 | 22.83  |          |        |
| -25153.74                           | -0.36  | -25117.29 | 3.41   | -25081.69 | 6.32   | -25042.96 | 12.37  | -25004.18 | 18.47  | -24968.84 | 21.13  | -24946.97 | 26.66  |          |        |
| -25154.01                           | -0.63  | -25118.27 | 2.43   | -25077.68 | 10.33  | -25035.70 | 19.64  | -25006.82 | 15.83  | -24969.83 | 20.14  | -24953.49 | 20.13  |          |        |

|           |       |           |        |           |       |           |       |           |       |           |        |           |       |
|-----------|-------|-----------|--------|-----------|-------|-----------|-------|-----------|-------|-----------|--------|-----------|-------|
| -25154.94 | -1.56 | -25117.98 | 2.72   | -25078.10 | 9.92  | -25042.06 | 13.28 | -25005.32 | 17.33 | -24832.60 | 157.37 | -24946.14 | 27.48 |
| -25154.13 | -0.75 | -25117.96 | 2.74   | -25080.09 | 7.92  | -25043.08 | 12.25 | -25005.51 | 17.14 | -24970.87 | 19.10  | -24948.96 | 24.67 |
| -25153.49 | -0.11 | -25116.02 | 4.68   | -25081.14 | 6.88  | -25044.44 | 10.89 | -25006.22 | 16.43 | -24971.66 | 18.31  | -24948.54 | 25.09 |
| -25154.53 | -1.15 | -25117.15 | 3.55   | -25081.43 | 6.58  | -25044.81 | 10.53 | -25007.16 | 15.49 | -24969.41 | 20.56  | -24947.71 | 25.92 |
| -25153.01 | 0.37  | -25116.07 | 4.63   | -25080.02 | 8.00  | -25043.02 | 12.31 | -25002.61 | 20.04 | -24971.50 | 18.47  | -24949.19 | 24.44 |
| -25154.53 | -1.15 | -25116.05 | 4.65   | -25079.53 | 8.49  | -25043.02 | 12.31 | -25005.69 | 16.96 | -24971.42 | 18.55  | -24952.27 | 21.35 |
| -25154.87 | -1.49 | -25118.53 | 2.17   | -25078.36 | 9.65  | -25039.22 | 16.12 | -25007.63 | 15.03 | -24963.44 | 26.53  | -24949.47 | 24.16 |
| -25155.54 | -2.16 | -25116.21 | 4.49   | -25080.00 | 8.01  | -25043.28 | 12.05 | -25002.44 | 20.22 | -24968.85 | 21.12  | -24951.70 | 21.93 |
| -25154.16 | -0.78 | -25115.88 | 4.82   | -25078.73 | 9.28  | -25046.21 | 9.13  | -25003.62 | 19.03 | -24967.72 | 22.25  | -24948.99 | 24.64 |
| -25153.33 | 0.05  | -25116.96 | 3.74   | -25074.60 | 13.42 | -25041.39 | 13.94 | -25007.24 | 15.42 | -24967.46 | 22.51  | -24952.55 | 21.08 |
| -25154.61 | -1.23 | -25118.55 | 2.15   | -25080.10 | 7.91  | -25041.43 | 13.91 | -25007.81 | 14.84 | -24970.17 | 19.80  | -24950.30 | 23.33 |
| -25155.10 | -1.72 | -25119.10 | 1.60   | -25079.92 | 8.10  | -25043.73 | 11.60 | -25003.72 | 18.93 | -24969.24 | 20.73  | -24952.65 | 20.98 |
| -25153.69 | -0.31 | -25114.47 | 6.23   | -25073.28 | 14.73 | -25040.18 | 15.16 | -25005.57 | 17.08 | -24965.96 | 24.01  | -24954.10 | 19.53 |
| -25153.68 | -0.30 | -25113.29 | 7.40   | -25080.29 | 7.73  | -25042.79 | 12.54 | -25007.67 | 14.99 | -24970.83 | 19.14  | -24942.55 | 31.08 |
| -25153.85 | -0.47 | -25118.59 | 2.11   | -25079.35 | 8.67  | -25044.79 | 10.54 | -25003.53 | 19.12 | -24969.06 | 20.91  | -24945.82 | 27.80 |
| -25153.40 | -0.02 | -25117.32 | 3.38   | -25079.96 | 8.06  | -25042.77 | 12.57 | -25008.02 | 14.64 | -24969.71 | 20.25  | -24952.60 | 21.03 |
| -25153.24 | 0.14  | -25117.98 | 2.71   | -25081.21 | 6.81  | -25045.46 | 9.88  | -25005.92 | 16.73 | -24966.16 | 23.81  | -24951.65 | 21.98 |
| -25154.85 | -1.47 | -25114.88 | 5.81   | -25077.61 | 10.41 | -25042.10 | 13.24 | -25007.25 | 15.40 | -24970.79 | 19.18  | -24946.53 | 27.09 |
| -25155.33 | -1.96 | -25114.45 | 6.25   | -25080.50 | 7.51  | -25041.12 | 14.22 | -25005.39 | 17.26 | -24964.88 | 25.09  | -24948.66 | 24.97 |
| -25154.14 | -0.77 | -25111.99 | 8.70   | -25083.07 | 4.95  | -25038.78 | 16.55 | -25009.59 | 13.07 | -24965.82 | 24.15  | -24950.82 | 22.81 |
| -25153.76 | -0.38 | -25158.57 | -37.87 | -25076.91 | 11.11 | -25042.91 | 12.43 | -25004.99 | 17.66 | -24969.39 | 20.57  | -24952.43 | 21.20 |
| -25154.93 | -1.55 | -25117.47 | 3.23   | -25079.08 | 8.94  | -25042.49 | 12.84 | -25007.46 | 15.19 | -24965.53 | 24.44  | -24952.10 | 21.53 |
| -25154.94 | -1.56 | -25117.04 | 3.66   | -25079.59 | 8.42  | -25041.59 | 13.75 | -25004.63 | 18.02 | -24969.87 | 20.10  | -24950.06 | 23.57 |
| -25154.72 | -1.34 | -25117.73 | 2.97   | -25082.27 | 5.75  | -25040.06 | 15.27 | -25005.84 | 16.82 | -24967.81 | 22.16  | -24949.81 | 23.82 |
| -25152.76 | 0.62  | -25117.21 | 3.49   | -25074.51 | 13.51 | -25041.50 | 13.84 | -25003.87 | 18.78 | -24965.26 | 24.71  | -24947.82 | 25.81 |
| -25154.05 | -0.67 | -25117.00 | 3.69   | -25078.58 | 9.43  | -25038.34 | 17.00 | -25006.03 | 16.62 | -24969.62 | 20.34  | -24954.16 | 19.47 |
| -25153.43 | -0.05 | -25117.32 | 3.38   | -25077.99 | 10.03 | -25045.37 | 9.96  | -25007.12 | 15.53 | -24962.21 | 27.76  | -24949.44 | 24.19 |
| -25155.01 | -1.64 | -25117.54 | 3.16   | -25081.30 | 6.72  | -25040.66 | 14.68 | -25008.09 | 14.56 | -24964.90 | 25.07  | -24951.41 | 22.22 |
| -25156.46 | -3.09 | -25116.10 | 4.59   | -25081.60 | 6.42  | -25042.78 | 12.55 | -25003.92 | 18.73 | -24966.55 | 23.42  | -24950.95 | 22.68 |
| -25153.67 | -0.29 | -25116.35 | 4.35   | -25079.12 | 8.89  | -25044.99 | 10.35 | -25004.12 | 18.53 | -24965.92 | 24.05  | -24946.40 | 27.23 |
| -25154.35 | -0.97 | -25118.81 | 1.88   | -25079.01 | 9.01  | -25042.66 | 12.67 | -25007.43 | 15.22 | -24972.90 | 17.07  | -24946.59 | 27.04 |
| -25153.17 | 0.21  | -25116.74 | 3.96   | -25078.17 | 9.85  | -25041.31 | 14.02 | -25001.59 | 21.06 | -24967.94 | 22.03  | -24950.48 | 23.15 |
| -25153.59 | -0.21 | -25118.11 | 2.59   | -25079.08 | 8.94  | -25039.52 | 15.81 | -25008.22 | 14.43 | -24968.83 | 21.14  | -24949.15 | 24.48 |
| -25155.53 | -2.15 | -25116.52 | 4.18   | -25081.21 | 6.81  | -25044.79 | 10.55 | -25006.65 | 16.01 | -24969.58 | 20.39  | -24950.91 | 22.72 |
| -25154.45 | -1.07 | -25118.18 | 2.52   | -25076.29 | 11.72 | -25043.68 | 11.66 | -25005.15 | 17.50 | -24971.72 | 18.25  | -24944.31 | 29.32 |
| -25154.73 | -1.35 | -25116.48 | 4.22   | -25079.72 | 8.30  | -25043.73 | 11.60 | -25003.00 | 19.65 | -24969.08 | 20.89  | -24949.15 | 24.48 |
| -25154.50 | -1.12 | -25116.65 | 4.04   | -25080.94 | 7.08  | -25044.22 | 11.11 | -25005.16 | 17.49 | -24969.48 | 20.49  | -24950.42 | 23.20 |
| -25154.41 | -1.03 | -25117.89 | 2.81   | -25078.55 | 9.47  | -25043.40 | 11.93 | -25005.06 | 17.59 | -24968.33 | 21.64  | -24951.82 | 21.81 |
| -25155.15 | -1.77 | -25117.50 | 3.20   | -25079.86 | 8.15  | -25039.03 | 16.30 | -25005.53 | 17.13 | -24971.01 | 18.96  | -24950.77 | 22.86 |
| -25153.81 | -0.43 | -25114.85 | 5.85   | -25082.22 | 5.79  | -25040.65 | 14.68 | -25008.92 | 13.73 | -24970.99 | 18.98  | -24947.07 | 26.56 |
| -25153.76 | -0.38 | -25117.65 | 3.05   | -25078.90 | 9.12  | -25043.43 | 11.91 | -25006.13 | 16.52 | -24965.39 | 24.58  | -24943.80 | 29.82 |

|           |       |           |        |           |        |           |       |           |       |           |       |           |       |
|-----------|-------|-----------|--------|-----------|--------|-----------|-------|-----------|-------|-----------|-------|-----------|-------|
| -25154.90 | -1.52 | -25113.82 | 6.87   | -25080.74 | 7.28   | -25040.65 | 14.68 | -25004.44 | 18.21 | -24969.51 | 20.46 | -24948.34 | 25.29 |
| -25154.22 | -0.84 | -25115.79 | 4.91   | -25076.54 | 11.48  | -25044.24 | 11.10 | -25005.95 | 16.70 | -24966.98 | 22.99 | -24954.56 | 19.06 |
| -25154.52 | -1.14 | -25151.44 | -30.74 | -25079.85 | 8.17   | -25042.86 | 12.47 | -25006.36 | 16.29 | -24971.03 | 18.94 | -24949.42 | 24.20 |
| -25154.36 | -0.98 | -25115.96 | 4.74   | -25075.11 | 12.90  | -25041.50 | 13.84 | -25007.03 | 15.62 | -24965.55 | 24.42 | -24947.86 | 25.77 |
| -25154.05 | -0.67 | -25117.57 | 3.13   | -25077.73 | 10.29  | -25041.93 | 13.40 | -25004.00 | 18.66 | -24971.20 | 18.77 | -24954.89 | 18.73 |
| -25154.98 | -1.60 | -25117.63 | 3.07   | -25078.25 | 9.77   | -25041.13 | 14.21 | -25002.81 | 19.84 | -24963.72 | 26.25 | -24946.30 | 27.33 |
| -25154.92 | -1.54 | -25118.48 | 2.22   | -25079.88 | 8.13   | -25041.80 | 13.53 | -24996.54 | 26.11 | -24968.82 | 21.15 | -24950.16 | 23.47 |
| -25152.37 | 1.00  | -25115.19 | 5.50   | -25078.73 | 9.29   | -25040.39 | 14.94 | -25006.68 | 15.97 | -24965.96 | 24.01 | -24951.99 | 21.64 |
| -25154.68 | -1.30 | -25117.49 | 3.21   | -25080.77 | 7.25   | -25035.05 | 20.28 | -25008.70 | 13.96 | -24966.61 | 23.36 | -24951.81 | 21.82 |
| -25153.54 | -0.16 | -25117.95 | 2.75   | -25079.20 | 8.81   | -25045.22 | 10.11 | -25006.05 | 16.61 | -24967.98 | 21.99 | -24952.47 | 21.16 |
| -25154.57 | -1.19 | -25116.04 | 4.66   | -25081.36 | 6.66   | -25044.60 | 10.74 | -25005.81 | 16.84 | -24970.97 | 18.99 | -24948.98 | 24.65 |
| -25152.91 | 0.47  | -25117.55 | 3.15   | -25081.56 | 6.45   | -25041.71 | 13.62 | -25003.42 | 19.23 | -24964.45 | 25.52 | -24947.43 | 26.20 |
| -25153.92 | -0.54 | -25118.33 | 2.36   | -25080.51 | 7.51   | -25044.81 | 10.52 | -25005.28 | 17.38 | -24972.17 | 17.80 | -24948.15 | 25.47 |
| -25154.51 | -1.13 | -25115.51 | 5.19   | -25079.54 | 8.48   | -25038.94 | 16.39 | -25002.95 | 19.70 | -24967.14 | 22.83 | -24950.10 | 23.53 |
| -25154.38 | -1.00 | -25116.52 | 4.17   | -25078.93 | 9.08   | -25042.72 | 12.62 | -25007.44 | 15.21 | -24964.81 | 25.16 | -24950.09 | 23.54 |
| -25154.70 | -1.32 | -25115.19 | 5.51   | -25080.93 | 7.09   | -25036.88 | 18.45 | -25007.56 | 15.09 | -24970.53 | 19.44 | -24952.48 | 21.15 |
| -25154.95 | -1.57 | -25116.65 | 4.05   | -25080.71 | 7.31   | -25043.32 | 12.01 | -25005.93 | 16.73 | -24970.56 | 19.41 | -24945.95 | 27.67 |
| -25153.89 | -0.51 | -25118.65 | 2.05   | -25119.32 | -31.31 | -25039.89 | 15.44 | -25005.84 | 16.81 | -24970.33 | 19.64 | -24944.73 | 28.90 |
| -25154.45 | -1.07 | -25118.40 | 2.29   | -25078.76 | 9.25   | -25041.33 | 14.01 | -25003.94 | 18.71 | -24970.72 | 19.25 | -24950.95 | 22.68 |
| -25153.76 | -0.38 | -25116.88 | 3.82   | -25080.42 | 7.59   | -25046.11 | 9.23  | -25004.50 | 18.15 | -24969.17 | 20.80 | -24951.86 | 21.77 |
| -25153.89 | -0.51 | -25118.81 | 1.89   | -25080.94 | 7.08   | -25043.81 | 11.53 | -25007.12 | 15.53 | -24963.70 | 26.26 | -24947.61 | 26.02 |
| -25155.25 | -1.87 | -25118.81 | 1.89   | -25079.02 | 8.99   | -25043.10 | 12.23 | -25009.14 | 13.51 | -24970.14 | 19.83 | -24950.18 | 23.45 |
| -25154.64 | -1.26 | -25113.78 | 6.92   | -25079.95 | 8.07   | -25043.15 | 12.19 | -25005.65 | 17.00 | -24972.32 | 17.65 | -24950.38 | 23.25 |
| -25154.97 | -1.59 | -25117.26 | 3.44   | -25079.72 | 8.29   | -25041.29 | 14.04 | -25007.87 | 14.78 | -24967.82 | 22.15 | -24951.34 | 22.28 |
| -25154.62 | -1.24 | -25117.94 | 2.76   | -25079.12 | 8.89   | -25042.05 | 13.29 | -25007.88 | 14.77 | -24965.29 | 24.68 | -24951.46 | 22.17 |
| -25156.03 | -2.65 | -25117.34 | 3.36   | -25077.51 | 10.51  | -25040.31 | 15.02 | -25006.10 | 16.55 | -24967.01 | 22.96 | -24950.28 | 23.34 |
| -25155.23 | -1.85 | -25116.21 | 4.48   | -25081.07 | 6.94   | -25040.79 | 14.55 | -25006.96 | 15.69 | -24965.59 | 24.38 | -24953.53 | 20.10 |
| -25154.18 | -0.80 | -25117.52 | 3.17   | -25079.10 | 8.91   | -25041.17 | 14.16 | -25007.01 | 15.64 | -24965.99 | 23.98 | -24949.77 | 23.86 |
| -25153.92 | -0.54 | -25117.55 | 3.15   | -25077.79 | 10.23  | -25044.22 | 11.11 | -25007.09 | 15.56 | -24970.35 | 19.62 | -24952.42 | 21.21 |
| -25153.66 | -0.28 | -25118.85 | 1.84   | -25077.16 | 10.86  | -25042.38 | 12.95 | -25002.29 | 20.36 | -24970.40 | 19.57 | -24943.38 | 30.25 |
| -25153.50 | -0.12 | -25115.93 | 4.77   | -25080.42 | 7.60   | -25042.38 | 12.95 | -25005.93 | 16.73 | -24969.37 | 20.59 | -24950.44 | 23.18 |
| -25155.18 | -1.80 | -25118.49 | 2.21   | -25081.14 | 6.88   | -25041.42 | 13.91 | -25007.52 | 15.13 | -24967.80 | 22.17 | -24953.34 | 20.29 |
| -25154.33 | -0.95 | -25117.25 | 3.45   | -25078.44 | 9.58   | -25042.41 | 12.93 | -24996.67 | 25.98 | -24965.36 | 24.61 | -24950.69 | 22.93 |
| -25154.11 | -0.73 | -25115.71 | 4.98   | -25080.89 | 7.13   | -25041.37 | 13.97 | -25003.45 | 19.20 | -24965.40 | 24.57 | -24951.24 | 22.39 |
| -25154.42 | -1.04 | -25117.97 | 2.72   | -25080.45 | 7.57   | -25043.15 | 12.18 | -25008.70 | 13.95 | -24969.97 | 19.99 | -24952.72 | 20.91 |
| -25153.80 | -0.42 | -25116.89 | 3.80   | -25079.90 | 8.12   | -25042.91 | 12.42 | -24998.88 | 23.77 | -24969.06 | 20.91 | -24950.34 | 23.29 |
| -25152.90 | 0.48  | -25118.10 | 2.60   | -25078.82 | 9.19   | -25043.40 | 11.93 |           |       | -24966.94 | 23.03 | -24951.98 | 21.65 |
| -25154.62 | -1.24 | -25115.21 | 5.48   | -25079.99 | 8.02   | -25040.40 | 14.93 |           |       | -24969.33 | 20.64 |           |       |
| -25154.36 | -0.98 | -25115.15 | 5.54   | -25077.08 | 10.94  | -25042.34 | 12.99 |           |       | -24972.10 | 17.87 |           |       |
| -25153.56 | -0.18 | -25117.33 | 3.37   | -25080.24 | 7.78   | -25039.65 | 15.68 |           |       |           |       |           |       |
| -25153.94 | -0.56 | -25116.37 | 4.32   | -25078.77 | 9.25   | -25042.60 | 12.73 |           |       |           |       |           |       |

|           |       |           |      |           |      |           |       |
|-----------|-------|-----------|------|-----------|------|-----------|-------|
| -25154.56 | -1.18 | -25118.24 | 2.46 | -25080.07 | 7.95 | -25042.81 | 12.53 |
| -25154.01 | -0.63 | -25117.25 | 3.45 |           |      | -25037.50 | 17.83 |
| -25153.50 | -0.12 | -25116.17 | 4.52 |           |      | -25038.99 | 16.34 |
| -25154.09 | -0.71 | -25116.39 | 4.31 |           |      | -25033.31 | 22.03 |
| -25155.64 | -2.27 | -25117.98 | 2.71 |           |      |           |       |
| -25154.37 | -0.99 |           |      |           |      |           |       |
| -25154.09 | -0.71 |           |      |           |      |           |       |

Average energies -25154.22 -0.84 -25117.55 3.15 -25079.63 8.39 -25041.93 13.40 -25005.55 17.10 -24967.25 22.72 -24949.87 23.76

ground state energy  
solid solution energy

# Pu

concentration in solid solution (%)  
number of atoms

|           | 3     | 6         | 9     | 12        | 15    | 18        | 21    |           |       |           |       |           |       |
|-----------|-------|-----------|-------|-----------|-------|-----------|-------|-----------|-------|-----------|-------|-----------|-------|
|           | 2     | 4         | 6     | 8         | 10    | 12        | 13    |           |       |           |       |           |       |
| -25149.13 | -1.74 | -25074.43 | 34.30 | -25064.51 | 5.55  | -24985.99 | 45.41 | -24978.56 | 14.16 | -24929.65 | 24.40 | -24878.36 | 56.36 |
| -25148.31 | -0.92 | -25075.26 | 33.47 | -25062.19 | 7.87  | -24987.81 | 43.58 | -24982.38 | 10.34 | -24937.96 | 16.09 | -24877.37 | 57.36 |
| -25148.03 | -0.63 | -25071.21 | 37.51 | -25061.15 | 8.91  | -24985.24 | 46.15 | -24976.78 | 15.94 | -24936.45 | 17.60 | -24879.86 | 54.87 |
| -25148.74 | -1.34 | -25070.73 | 38.00 | -25059.10 | 10.96 | -24986.16 | 45.23 | -24976.73 | 15.99 | -24939.13 | 14.93 | -24883.05 | 51.68 |
| -25148.36 | -0.97 | -25074.99 | 33.74 | -25061.84 | 8.22  | -24983.46 | 47.93 | -24974.58 | 18.14 | -24934.63 | 19.42 | -24881.34 | 53.38 |
| -25148.41 | -1.01 | -25072.17 | 36.56 | -25063.77 | 6.29  | -24984.28 | 47.11 | -24976.76 | 15.97 | -24938.90 | 15.15 | -24877.25 | 57.47 |
| -25146.85 | 0.54  | -25073.11 | 35.62 | -25064.87 | 5.19  | -24986.58 | 44.81 | -24978.55 | 14.17 | -24935.09 | 18.96 | -24872.46 | 62.26 |
| -25148.64 | -1.25 | -25074.69 | 34.04 | -25064.15 | 5.90  | -24989.86 | 41.53 | -24979.31 | 13.41 | -24938.12 | 15.94 | -24884.51 | 50.21 |
| -25149.09 | -1.69 | -25073.71 | 35.02 | -25061.44 | 8.61  | -24981.79 | 49.60 | -24976.98 | 15.74 | -24938.40 | 15.65 | -24881.03 | 53.69 |
| -25149.52 | -2.13 | -25074.23 | 34.50 | -25064.33 | 5.73  | -24986.26 | 45.13 | -24980.12 | 12.61 | -24938.92 | 15.14 | -24878.71 | 56.01 |
| -25149.29 | -1.90 | -25072.54 | 36.18 | -25064.94 | 5.12  | -24987.46 | 43.93 | -24976.79 | 15.93 | -24937.60 | 16.46 | -24880.94 | 53.79 |
| -25148.73 | -1.33 | -25073.06 | 35.66 | -25064.29 | 5.77  | -24989.01 | 42.39 | -24976.81 | 15.91 | -24938.32 | 15.73 | -24885.89 | 48.83 |
| -25147.29 | 0.10  | -25072.48 | 36.24 | -25060.80 | 9.26  | -24981.98 | 49.41 | -24979.12 | 13.61 | -24937.82 | 16.24 | -24876.54 | 58.18 |
| -25149.33 | -1.94 | -25071.68 | 37.04 | -25062.17 | 7.89  | -24985.24 | 46.15 | -24978.15 | 14.58 | -24934.50 | 19.56 | -24879.29 | 55.43 |
| -25148.86 | -1.46 | -25072.84 | 35.89 | -25063.58 | 6.48  | -24990.31 | 41.08 | -24980.56 | 12.16 | -24937.33 | 16.73 | -24879.43 | 55.29 |
| -25148.40 | -1.01 | -25070.41 | 38.31 | -25064.43 | 5.63  | -24984.55 | 46.84 | -24976.97 | 15.75 | -24934.73 | 19.33 | -24879.05 | 55.68 |
| -25148.79 | -1.40 | -25075.20 | 33.53 | -25061.35 | 8.71  | -24988.91 | 42.48 | -24978.69 | 14.03 | -24939.80 | 14.26 | -24879.96 | 54.77 |
| -25147.03 | 0.36  | -25069.73 | 38.99 | -25062.50 | 7.56  | -24979.74 | 51.65 | -24980.65 | 12.07 | -24937.65 | 16.41 | -24883.70 | 51.02 |
| -25148.22 | -0.83 | -25072.93 | 35.79 | -25062.80 | 7.26  | -24982.91 | 48.48 | -24980.04 | 12.68 | -24933.98 | 20.08 | -24873.62 | 61.10 |
| -25148.51 | -1.12 | -25074.96 | 33.77 | -25061.52 | 8.54  | -24988.46 | 42.93 | -24975.78 | 16.94 | -24939.48 | 14.57 | -24878.83 | 55.90 |
| -25147.87 | -0.47 | -25071.04 | 37.69 | -25064.87 | 5.19  | -24986.12 | 45.27 | -24980.56 | 12.17 | -24938.53 | 15.53 | -24875.98 | 58.75 |
| -25146.93 | 0.46  | -25072.64 | 36.09 | -25063.81 | 6.24  | -24988.53 | 42.87 | -24978.08 | 14.64 | -24939.15 | 14.91 | -24884.06 | 50.66 |
| -25148.90 | -1.51 | -25074.17 | 34.56 | -25060.28 | 9.78  | -24986.84 | 44.55 | -24978.63 | 14.09 | -24934.73 | 19.32 | -24880.58 | 54.14 |
| -25147.40 | -0.01 | -25072.50 | 36.23 | -25062.43 | 7.63  | -24989.82 | 41.58 | -24981.32 | 11.41 | -24938.27 | 15.79 | -24878.57 | 56.15 |
| -25148.48 | -1.08 | -25071.50 | 37.23 | -25062.92 | 7.13  | -24983.91 | 47.48 | -24979.48 | 13.25 | -24936.04 | 18.02 | -24879.25 | 55.48 |

|           |       |           |       |           |       |           |       |           |       |           |       |           |       |
|-----------|-------|-----------|-------|-----------|-------|-----------|-------|-----------|-------|-----------|-------|-----------|-------|
| -25149.42 | -2.02 | -25071.19 | 37.53 | -25061.50 | 8.56  | -24987.08 | 44.31 | -24974.29 | 18.44 | -24936.38 | 17.68 | -24876.29 | 58.43 |
| -25147.24 | 0.15  | -25074.06 | 34.67 | -25063.65 | 6.41  | -24985.60 | 45.79 | -24978.94 | 13.78 | -24936.86 | 17.19 | -24883.57 | 51.15 |
| -25149.73 | -2.33 | -25072.91 | 35.82 | -25065.11 | 4.95  | -24981.95 | 49.45 | -24975.11 | 17.61 | -24930.14 | 23.91 | -24881.13 | 53.59 |
| -25147.50 | -0.10 | -25073.48 | 35.24 | -25058.58 | 11.48 | -24986.13 | 45.26 | -24980.65 | 12.07 | -24935.04 | 19.01 | -24880.46 | 54.26 |
| -25149.74 | -2.34 | -25073.05 | 35.67 | -25064.19 | 5.87  | -24983.32 | 48.07 | -24979.54 | 13.18 | -24933.27 | 20.79 | -24876.16 | 58.56 |
| -25147.37 | 0.02  | -25073.78 | 34.94 | -25064.57 | 5.48  | -24981.82 | 49.57 | -24976.56 | 16.17 | -24937.88 | 16.18 | -24881.97 | 52.75 |
| -25149.15 | -1.75 | -25072.38 | 36.34 | -25065.03 | 5.03  | -24986.34 | 45.05 | -24979.39 | 13.34 | -24932.32 | 21.73 | -24883.42 | 51.30 |
| -25147.95 | -0.56 | -25071.22 | 37.51 | -25061.56 | 8.50  | -24988.96 | 42.43 | -24976.96 | 15.76 | -24935.07 | 18.99 | -24881.00 | 53.72 |
| -25149.60 | -2.20 | -25071.16 | 37.57 | -25064.66 | 5.40  | -24987.55 | 43.84 | -24983.01 | 9.71  | -24936.59 | 17.46 | -24883.54 | 51.18 |
| -25147.71 | -0.31 | -25073.77 | 34.96 | -25061.47 | 8.59  | -24985.48 | 45.91 | -24977.07 | 15.66 | -24939.20 | 14.86 | -24880.70 | 54.02 |
| -25148.18 | -0.78 | -25074.07 | 34.66 | -25061.25 | 8.81  | -24988.51 | 42.88 | -24979.44 | 13.29 | -24940.56 | 13.49 | -24879.52 | 55.20 |
| -25147.75 | -0.36 | -25071.64 | 37.09 | -25062.47 | 7.59  | -24983.81 | 47.58 | -24979.31 | 13.41 | -24938.12 | 15.93 | -24879.35 | 55.38 |
| -25147.46 | -0.07 | -25073.18 | 35.55 | -25063.15 | 6.91  | -24990.87 | 40.52 | -24977.53 | 15.19 | -24937.42 | 16.64 | -24884.10 | 50.63 |
| -25149.62 | -2.23 | -25073.15 | 35.58 | -25064.58 | 5.48  | -24986.80 | 44.59 | -24977.80 | 14.92 | -24938.49 | 15.57 | -24886.29 | 48.43 |
| -25146.97 | 0.42  | -25073.11 | 35.62 | -25064.41 | 5.64  | -24985.69 | 45.70 | -24979.93 | 12.79 | -24935.87 | 18.19 | -24875.60 | 59.12 |
| -25149.60 | -2.21 | -25070.72 | 38.00 | -25064.23 | 5.83  | -24985.43 | 45.96 | -24980.84 | 11.89 | -24936.70 | 17.36 | -24880.33 | 54.40 |
| -25149.55 | -2.16 | -25071.64 | 37.09 | -25063.35 | 6.71  | -24989.02 | 42.37 | -24977.64 | 15.08 | -24932.12 | 21.93 | -24877.76 | 56.96 |
| -25147.65 | -0.25 | -25072.34 | 36.39 | -25064.17 | 5.89  | -24988.06 | 43.33 | -24979.29 | 13.43 | -24935.68 | 18.37 | -24879.57 | 55.15 |
| -25148.18 | -0.79 | -25072.78 | 35.94 | -25061.44 | 8.62  | -24984.69 | 46.70 | -24978.51 | 14.21 | -24933.27 | 20.79 | -24882.86 | 51.87 |
| -25147.41 | -0.02 | -25072.79 | 35.93 | -25062.67 | 7.39  | -24987.66 | 43.73 | -24978.53 | 14.20 | -24937.23 | 16.83 | -24876.04 | 58.68 |
| -25147.69 | -0.30 | -25072.18 | 36.55 | -25062.31 | 7.75  | -24987.31 | 44.08 | -24978.51 | 14.21 | -24937.39 | 16.66 | -24881.18 | 53.55 |
| -25147.75 | -0.36 | -25074.26 | 34.47 | -25063.46 | 6.60  | -24990.38 | 41.01 | -24978.13 | 14.59 | -24938.78 | 15.28 | -24882.12 | 52.60 |
| -25149.00 | -1.61 | -25072.08 | 36.65 | -25062.64 | 7.42  | -24986.05 | 45.35 | -24981.86 | 10.86 | -24939.36 | 14.70 | -24879.40 | 55.32 |
| -25148.01 | -0.62 | -25073.64 | 35.09 | -25065.20 | 4.86  | -24986.90 | 44.50 | -24978.22 | 14.51 | -24937.09 | 16.97 | -24878.57 | 56.15 |
| -25149.77 | -2.37 | -25072.97 | 35.76 | -25060.69 | 9.37  | -24980.31 | 51.08 | -24979.56 | 13.16 | -24937.98 | 16.07 | -24877.34 | 57.38 |
| -25149.41 | -2.02 | -25072.81 | 35.92 | -25060.60 | 9.46  | -24981.37 | 50.03 | -24978.20 | 14.53 | -24934.55 | 19.51 | -24880.71 | 54.01 |
| -25148.23 | -0.84 | -25073.89 | 34.83 | -25061.14 | 8.92  | -24987.71 | 43.69 | -24974.42 | 18.30 | -24938.55 | 15.50 | -24871.60 | 63.12 |
| -25146.53 | 0.87  | -25074.52 | 34.20 | -25063.39 | 6.67  | -24985.97 | 45.42 | -24978.53 | 14.20 | -24935.48 | 18.58 | -24881.76 | 52.96 |
| -25148.36 | -0.97 | -25072.21 | 36.51 | -25062.66 | 7.40  | -24982.01 | 49.39 | -24977.60 | 15.13 | -24935.04 | 19.01 | -24884.06 | 50.66 |
| -25149.70 | -2.30 | -25070.31 | 38.41 | -25063.06 | 7.00  | -24989.81 | 41.58 | -24979.78 | 12.95 | -24938.16 | 15.90 | -24873.47 | 61.26 |
| -25148.22 | -0.83 | -25071.87 | 36.86 | -25065.17 | 4.89  | -24987.32 | 44.07 | -24979.49 | 13.23 | -24941.50 | 12.56 | -24879.23 | 55.49 |
| -25150.35 | -2.95 | -25070.49 | 38.24 | -25064.38 | 5.68  | -24985.24 | 46.16 | -24980.77 | 11.95 | -24939.86 | 14.19 | -24880.25 | 54.47 |
| -25147.99 | -0.60 | -25069.68 | 39.05 | -25060.13 | 9.93  | -24988.74 | 42.65 | -24977.39 | 15.33 | -24939.47 | 14.58 | -24883.34 | 51.38 |
| -25148.56 | -1.17 | -25074.27 | 34.46 | -25064.40 | 5.66  | -24990.27 | 41.12 | -24980.02 | 12.70 | -24942.00 | 12.05 | -24883.32 | 51.40 |
| -25148.32 | -0.93 | -25068.81 | 39.92 | -25061.61 | 8.45  | -24981.80 | 49.59 | -24975.32 | 17.40 | -24930.05 | 24.00 | -24879.84 | 54.89 |
| -25149.39 | -2.00 | -25072.65 | 36.08 | -25060.86 | 9.20  | -24985.49 | 45.90 | -24980.25 | 12.47 | -24932.67 | 21.38 | -24882.62 | 52.10 |
| -25149.53 | -2.13 | -25071.47 | 37.26 | -25059.20 | 10.86 | -24985.70 | 45.69 | -24978.45 | 14.27 | -24941.20 | 12.86 | -24877.21 | 57.52 |
| -25149.26 | -1.87 | -25071.68 | 37.05 | -25063.54 | 6.52  | -24986.61 | 44.78 | -24980.40 | 12.32 | -24934.24 | 19.81 | -24881.35 | 53.37 |
| -25148.44 | -1.04 | -25071.45 | 37.28 | -25063.29 | 6.77  | -24988.74 | 42.65 | -24981.80 | 10.92 | -24937.39 | 16.67 | -24881.54 | 53.18 |
| -25148.37 | -0.98 | -25073.92 | 34.81 | -25066.28 | 3.78  | -24985.60 | 45.79 | -24981.17 | 11.56 | -24940.92 | 13.14 | -24884.65 | 50.07 |
| -25148.48 | -1.09 | -25070.25 | 38.48 | -25059.91 | 10.15 | -24986.90 | 44.50 | -24978.79 | 13.93 | -24939.87 | 14.19 | -24876.26 | 58.46 |

|           |       |           |       |           |       |           |       |           |       |           |       |           |       |
|-----------|-------|-----------|-------|-----------|-------|-----------|-------|-----------|-------|-----------|-------|-----------|-------|
| -25147.03 | 0.36  | -25073.13 | 35.60 | -25063.37 | 6.69  | -24988.07 | 43.32 | -24974.69 | 18.03 | -24942.40 | 11.66 | -24876.41 | 58.32 |
| -25147.39 | 0.01  | -25070.34 | 38.38 | -25061.17 | 8.89  | -24985.54 | 45.86 | -24974.28 | 18.45 | -24937.86 | 16.19 | -24875.03 | 59.69 |
| -25149.01 | -1.62 | -25074.05 | 34.68 | -25064.55 | 5.50  | -24985.82 | 45.57 | -24980.24 | 12.48 | -24938.35 | 15.71 | -24882.30 | 52.42 |
| -25147.23 | 0.16  | -25071.20 | 37.52 | -25064.16 | 5.90  | -24988.03 | 43.36 | -24977.86 | 14.86 | -24939.31 | 14.74 | -24882.81 | 51.91 |
| -25149.15 | -1.75 | -25069.51 | 39.22 | -25065.28 | 4.77  | -24987.24 | 44.16 | -24975.20 | 17.52 | -24938.96 | 15.10 | -24877.87 | 56.85 |
| -25149.02 | -1.63 | -25070.11 | 38.62 | -25063.10 | 6.95  | -24987.28 | 44.11 | -24982.02 | 10.70 | -24936.83 | 17.23 | -24881.84 | 52.88 |
| -25148.85 | -1.45 | -25071.02 | 37.70 | -25061.86 | 8.20  | -24988.16 | 43.23 | -24977.46 | 15.27 | -24936.78 | 17.27 | -24884.51 | 50.21 |
| -25148.49 | -1.10 | -25074.90 | 33.82 | -25062.88 | 7.18  | -24982.84 | 48.55 | -24980.20 | 12.52 | -24937.20 | 16.86 | -24877.77 | 56.95 |
| -25148.37 | -0.97 | -25071.37 | 37.36 | -25064.21 | 5.84  | -24988.03 | 43.36 | -24977.29 | 15.43 | -24939.41 | 14.64 | -24877.46 | 57.26 |
| -25147.82 | -0.42 | -25074.20 | 34.52 | -25064.37 | 5.68  | -24986.65 | 44.74 | -24978.71 | 14.01 | -24937.34 | 16.71 | -24879.94 | 54.78 |
| -25148.87 | -1.47 | -25073.94 | 34.79 | -25064.86 | 5.19  | -24989.65 | 41.74 | -24980.94 | 11.78 | -24938.59 | 15.46 | -24877.63 | 57.10 |
| -25146.92 | 0.48  | -25074.00 | 34.73 | -25060.34 | 9.72  | -24986.94 | 44.45 | -24982.27 | 10.45 | -24936.15 | 17.91 | -24881.55 | 53.17 |
| -25147.42 | -0.03 | -25072.21 | 36.52 | -25062.88 | 7.18  | -24987.42 | 43.97 | -24980.13 | 12.60 | -24938.72 | 15.34 | -24870.41 | 64.31 |
| -25147.97 | -0.58 | -25072.38 | 36.34 | -25061.75 | 8.31  | -24988.07 | 43.32 | -24978.07 | 14.65 | -24942.76 | 11.30 | -24873.92 | 60.81 |
| -25148.96 | -1.57 | -25073.34 | 35.38 | -25062.04 | 8.02  | -24989.31 | 42.08 | -24975.80 | 16.92 | -24936.81 | 17.25 | -24876.99 | 57.73 |
| -25148.96 | -1.57 | -25072.55 | 36.18 | -25061.20 | 8.85  | -24989.48 | 41.91 | -24975.77 | 16.96 | -24938.23 | 15.83 | -24875.38 | 59.35 |
| -25149.49 | -2.09 | -25074.42 | 34.30 | -25065.13 | 4.93  | -24987.13 | 44.26 | -24980.89 | 11.83 | -24937.64 | 16.41 | -24880.31 | 54.41 |
| -25147.62 | -0.23 | -25072.79 | 35.94 | -25064.69 | 5.37  | -24987.19 | 44.20 | -24981.57 | 11.16 | -24938.38 | 15.68 | -24878.27 | 56.45 |
| -25148.64 | -1.24 | -25073.63 | 35.09 | -25063.53 | 6.53  | -24986.39 | 45.00 | -24979.60 | 13.13 | -24940.49 | 13.57 | -24883.98 | 50.75 |
| -25149.66 | -2.26 | -25073.12 | 35.61 | -25059.03 | 11.03 | -24985.69 | 45.71 | -24981.03 | 11.69 | -24939.19 | 14.87 | -24877.09 | 57.64 |
| -25147.68 | -0.29 | -25074.23 | 34.50 | -25063.82 | 6.23  | -24984.74 | 46.65 | -24981.15 | 11.57 | -24938.06 | 15.99 | -24879.06 | 55.66 |
| -25149.24 | -1.84 | -25071.66 | 37.07 | -25059.75 | 10.30 | -24986.56 | 44.83 | -24977.34 | 15.38 | -24938.80 | 15.25 | -24880.57 | 54.15 |
| -25147.19 | 0.21  | -25071.43 | 37.30 | -25064.08 | 5.98  | -24986.46 | 44.93 | -24975.99 | 16.73 | -24937.06 | 16.99 | -24877.46 | 57.26 |
| -25148.53 | -1.13 | -25073.76 | 34.96 | -25062.68 | 7.38  | -24985.14 | 46.25 | -24983.67 | 9.05  | -24937.21 | 16.84 | -24882.52 | 52.20 |
| -25149.23 | -1.83 | -25074.26 | 34.46 | -25063.11 | 6.95  | -24987.57 | 43.82 | -24978.00 | 14.72 | -24936.10 | 17.96 | -24876.84 | 57.88 |
| -25149.60 | -2.21 | -25071.16 | 37.57 | -25062.43 | 7.63  | -24988.41 | 42.98 | -24979.06 | 13.66 | -24937.60 | 16.46 | -24879.26 | 55.46 |
| -25149.26 | -1.87 | -25073.64 | 35.08 | -25064.59 | 5.47  | -24986.75 | 44.64 | -24977.40 | 15.32 | -24936.04 | 18.01 | -24879.74 | 54.98 |
| -25148.19 | -0.80 | -25071.40 | 37.32 | -25064.62 | 5.44  | -24982.77 | 48.62 | -24978.13 | 14.59 | -24938.01 | 16.04 | -24873.55 | 61.18 |
| -25149.47 | -2.08 | -25074.47 | 34.26 | -25062.61 | 7.45  | -24989.95 | 41.44 | -24977.90 | 14.82 | -24937.08 | 16.98 | -24880.43 | 54.29 |
| -25147.17 | 0.23  | -25072.11 | 36.61 | -25061.78 | 8.27  | -24985.52 | 45.87 | -24979.85 | 12.87 | -24938.82 | 15.24 | -24880.13 | 54.59 |
| -25148.64 | -1.25 | -25074.16 | 34.57 | -25064.97 | 5.09  | -24986.44 | 44.95 | -24976.41 | 16.31 | -24938.88 | 15.17 | -24880.40 | 54.32 |
| -25147.18 | 0.21  | -25072.62 | 36.11 | -25064.49 | 5.57  | -24985.30 | 46.09 | -24978.16 | 14.57 | -24937.79 | 16.27 | -24879.12 | 55.60 |
| -25148.85 | -1.45 | -25075.23 | 33.49 | -25064.18 | 5.88  | -24984.82 | 46.57 | -24981.21 | 11.51 | -24937.17 | 16.89 | -24876.75 | 57.97 |
| -25148.30 | -0.91 | -25067.40 | 41.33 | -25064.05 | 6.01  | -24985.58 | 45.81 | -24982.26 | 10.46 | -24937.37 | 16.68 | -24883.36 | 51.36 |
| -25149.68 | -2.29 | -25070.47 | 38.25 | -25063.25 | 6.81  | -24989.29 | 42.11 | -24977.84 | 14.88 | -24937.36 | 16.70 | -24878.86 | 55.86 |
| -25147.94 | -0.54 | -25071.53 | 37.20 | -25063.23 | 6.83  | -24984.74 | 46.65 | -24981.29 | 11.43 | -24933.78 | 20.28 | -24877.51 | 57.21 |
| -25146.20 | 1.20  | -25071.40 | 37.33 | -25062.08 | 7.98  | -24985.29 | 46.10 | -24978.66 | 14.06 | -24937.23 | 16.83 | -24879.77 | 54.95 |
| -25148.20 | -0.81 | -25072.02 | 36.70 | -25063.10 | 6.96  | -24989.25 | 42.14 | -24982.19 | 10.53 | -24939.10 | 14.95 | -24882.76 | 51.96 |
| -25148.03 | -0.64 | -25072.85 | 35.87 | -25060.63 | 9.43  | -24986.41 | 44.98 | -24972.50 | 20.22 | -24937.15 | 16.91 | -24881.41 | 53.31 |
| -25148.08 | -0.69 | -25067.58 | 41.15 | -25058.97 | 11.09 | -24981.64 | 49.75 | -24974.71 | 18.01 | -24934.94 | 19.12 | -24881.76 | 52.96 |
| -25149.37 | -1.97 | -25071.92 | 36.80 | -25064.60 | 5.46  | -24987.95 | 43.44 | -24981.07 | 11.66 | -24936.65 | 17.41 | -24881.91 | 52.81 |

|           |       |           |       |           |      |           |       |           |       |           |       |           |       |
|-----------|-------|-----------|-------|-----------|------|-----------|-------|-----------|-------|-----------|-------|-----------|-------|
| -25148.61 | -1.21 | -25073.37 | 35.36 | -25063.28 | 6.78 | -24985.12 | 46.27 | -24981.93 | 10.79 | -24938.72 | 15.34 | -24879.35 | 55.37 |
| -25148.08 | -0.69 | -25071.34 | 37.39 | -25064.45 | 5.61 | -24988.49 | 42.90 | -24978.46 | 14.26 | -24937.40 | 16.65 | -24880.40 | 54.32 |
| -25149.67 | -2.27 | -25071.25 | 37.48 | -25065.23 | 4.83 | -24983.84 | 47.55 | -24976.55 | 16.17 | -24938.04 | 16.02 | -24884.21 | 50.52 |
| -25148.42 | -1.03 | -25071.45 | 37.27 | -25064.04 | 6.02 | -24983.12 | 48.27 | -24978.36 | 14.36 | -24934.58 | 19.48 | -24880.74 | 53.98 |
| -25148.77 | -1.38 | -25072.77 | 35.96 | -25064.80 | 5.26 | -24988.88 | 42.51 | -24980.13 | 12.59 | -24936.37 | 17.69 | -24881.88 | 52.85 |
| -25148.45 | -1.06 | -25072.24 | 36.48 | -25063.29 | 6.77 | -24991.77 | 39.62 | -24980.91 | 11.81 |           |       |           |       |
| -25147.10 | 0.30  | -25073.28 | 35.45 | -25062.58 | 7.48 |           |       | -24977.72 | 15.01 |           |       |           |       |
| -25148.66 | -1.27 | -25069.62 | 39.10 | -25065.47 | 4.59 |           |       |           |       |           |       |           |       |
| -25148.17 | -0.77 |           |       |           |      |           |       |           |       |           |       |           |       |

Average energies

|           |       |           |       |           |      |           |       |           |       |           |       |           |       |
|-----------|-------|-----------|-------|-----------|------|-----------|-------|-----------|-------|-----------|-------|-----------|-------|
| -25148.42 | -1.03 | -25072.46 | 36.27 | -25062.98 | 7.08 | -24986.40 | 44.99 | -24978.72 | 14.00 | -24937.26 | 16.79 | -24879.73 | 54.99 |
|-----------|-------|-----------|-------|-----------|------|-----------|-------|-----------|-------|-----------|-------|-----------|-------|

# Th

ground state energy    solid solution energy

concentration in solid solution (%)  
number of atoms

|           | 3     | 6         | 9    | 12        | 15     | 18        | 21    |           |       |           |       |           |       |
|-----------|-------|-----------|------|-----------|--------|-----------|-------|-----------|-------|-----------|-------|-----------|-------|
|           | 2     | 4         | 6    | 8         | 10     | 12        | 13    |           |       |           |       |           |       |
| -25153.91 | -0.89 | -25116.62 | 3.37 | -25078.24 | 8.71   | -25041.16 | 12.75 | -25006.37 | 14.50 | -24967.87 | 19.97 | -24949.11 | 22.21 |
| -25153.14 | -0.12 | -25116.75 | 3.24 | -25079.87 | 7.08   | -25040.57 | 13.35 | -25004.32 | 16.56 | -24965.20 | 22.64 | -24944.82 | 26.50 |
| -25153.68 | -0.65 | -25116.52 | 3.47 | -25077.89 | 9.06   | -25043.06 | 10.85 | -25003.59 | 17.29 | -24970.15 | 17.69 | -24947.05 | 24.27 |
| -25155.10 | -2.08 | -25116.72 | 3.27 | -25080.10 | 6.85   | -25042.09 | 11.82 | -24999.88 | 21.00 | -24967.31 | 20.52 | -24945.20 | 26.12 |
| -25152.92 | 0.11  | -25116.17 | 3.82 | -25077.13 | 9.82   | -25042.37 | 11.54 | -25004.12 | 16.75 | -24961.25 | 26.59 | -24949.55 | 21.77 |
| -25153.40 | -0.37 | -25116.37 | 3.61 | -25079.83 | 7.12   | -25042.64 | 11.28 | -25002.48 | 18.40 | -24966.11 | 21.73 | -24947.53 | 23.79 |
| -25153.09 | -0.06 | -25117.52 | 2.46 | -25078.17 | 8.78   | -25042.13 | 11.78 | -25001.28 | 19.59 | -24965.70 | 22.14 | -24942.61 | 28.71 |
| -25154.72 | -1.70 | -25115.83 | 4.16 | -25118.82 | -31.87 | -25041.88 | 12.03 | -25004.84 | 16.04 | -24966.06 | 21.78 | -24951.86 | 19.46 |
| -25155.33 | -2.30 | -25117.30 | 2.68 | -25077.53 | 9.42   | -25041.91 | 12.00 | -25005.05 | 15.82 | -24969.24 | 18.60 | -24949.69 | 21.63 |
| -25152.48 | 0.55  | -25114.63 | 5.36 | -25078.18 | 8.77   | -25043.61 | 10.30 | -25002.19 | 18.69 | -24965.42 | 22.42 | -24950.11 | 21.21 |
| -25155.30 | -2.28 | -25117.21 | 2.78 | -25079.12 | 7.83   | -25040.82 | 13.09 | -25000.45 | 20.43 | -24967.90 | 19.94 | -24947.43 | 23.89 |
| -25153.36 | -0.33 | -25117.00 | 2.99 | -25076.70 | 10.25  | -25041.68 | 12.23 | -25000.08 | 20.79 | -24967.75 | 20.09 | -24946.00 | 25.32 |
| -25155.08 | -2.05 | -25116.71 | 3.27 | -25078.51 | 8.44   | -25043.20 | 10.72 | -25005.35 | 15.52 | -24965.23 | 22.61 | -24950.80 | 20.52 |
| -25150.92 | 2.11  | -25115.80 | 4.19 | -25074.40 | 12.55  | -25040.68 | 13.23 | -25005.47 | 15.41 | -24964.50 | 23.34 | -24942.87 | 28.45 |
| -25153.44 | -0.41 | -25118.24 | 1.75 | -25078.27 | 8.68   | -25042.51 | 11.40 | -25005.27 | 15.61 | -24966.09 | 21.75 | -24949.58 | 21.74 |
| -25153.95 | -0.93 | -25114.27 | 5.71 | -25077.51 | 9.44   | -25038.89 | 15.02 | -25006.81 | 14.06 | -24963.06 | 24.78 | -24940.91 | 30.41 |
| -25154.30 | -1.28 | -25117.43 | 2.56 | -25080.38 | 6.57   | -25043.97 | 9.95  | -25001.08 | 19.80 | -24960.76 | 27.08 | -24949.43 | 21.89 |
| -25154.81 | -1.78 | -25116.63 | 3.35 | -25079.42 | 7.53   | -25042.33 | 11.58 | -25003.92 | 16.95 | -24962.82 | 25.02 | -24944.73 | 26.59 |
| -25153.21 | -0.18 | -25115.82 | 4.16 | -25075.31 | 11.64  | -25037.02 | 16.89 | -25005.03 | 15.84 | -24969.78 | 18.06 | -24946.68 | 24.64 |
| -25153.57 | -0.54 | -25116.20 | 3.79 | -25080.08 | 6.87   | -25038.93 | 14.99 | -25004.30 | 16.58 | -24970.70 | 17.13 | -24950.47 | 20.85 |
| -25154.88 | -1.85 | -25115.85 | 4.13 | -25079.76 | 7.19   | -25041.60 | 12.31 | -25001.54 | 19.34 | -24961.12 | 26.72 | -24947.91 | 23.41 |

|           |       |           |      |           |       |           |       |           |       |           |       |           |       |
|-----------|-------|-----------|------|-----------|-------|-----------|-------|-----------|-------|-----------|-------|-----------|-------|
| -25153.97 | -0.94 | -25114.33 | 5.66 | -25079.96 | 6.99  | -25040.01 | 13.91 | -25002.65 | 18.23 | -24967.36 | 20.48 | -24949.86 | 21.46 |
| -25154.03 | -1.01 | -25117.59 | 2.39 | -25079.21 | 7.74  | -25041.34 | 12.57 | -25004.73 | 16.14 | -24965.31 | 22.53 | -24950.17 | 21.15 |
| -25153.22 | -0.19 | -25115.47 | 4.51 | -25080.00 | 6.95  | -25041.09 | 12.82 | -25001.58 | 19.30 | -24968.72 | 19.12 | -24945.97 | 25.35 |
| -25154.98 | -1.95 | -25118.00 | 1.99 | -25078.92 | 8.03  | -25040.70 | 13.21 | -25004.70 | 16.17 | -24957.87 | 29.97 | -24944.57 | 26.75 |
| -25154.39 | -1.37 | -25116.16 | 3.83 | -25079.82 | 7.13  | -25039.79 | 14.12 | -25004.29 | 16.58 | -24964.97 | 22.87 | -24950.85 | 20.47 |
| -25154.14 | -1.11 | -25116.73 | 3.26 | -25081.11 | 5.84  | -25041.39 | 12.52 | -25007.76 | 13.12 | -24968.55 | 19.29 | -24949.20 | 22.12 |
| -25154.82 | -1.79 | -25115.60 | 4.39 | -25079.27 | 7.68  | -25038.90 | 15.01 | -25002.85 | 18.02 | -24967.30 | 20.54 | -24951.02 | 20.30 |
| -25153.28 | -0.25 | -25117.35 | 2.64 | -25080.12 | 6.83  | -25041.17 | 12.75 | -24995.44 | 25.44 | -24964.95 | 22.88 | -24948.70 | 22.62 |
| -25153.23 | -0.21 | -25117.98 | 2.00 | -25078.99 | 7.96  | -25040.06 | 13.85 | -25004.20 | 16.68 | -24966.32 | 21.51 | -24948.49 | 22.83 |
| -25154.16 | -1.13 | -25118.43 | 1.55 | -25075.61 | 11.34 | -25041.48 | 12.43 | -25006.49 | 14.39 | -24968.13 | 19.71 | -24941.58 | 29.74 |
| -25152.16 | 0.87  | -25116.40 | 3.59 | -25080.14 | 6.81  | -25038.68 | 15.23 | -25005.11 | 15.77 | -24962.97 | 24.87 | -24948.56 | 22.76 |
| -25153.87 | -0.85 | -25117.11 | 2.88 | -25079.25 | 7.70  | -25040.59 | 13.32 | -25005.92 | 14.95 | -24969.23 | 18.61 | -24949.47 | 21.85 |
| -25153.91 | -0.89 | -25112.22 | 7.77 | -25077.93 | 9.02  | -25041.41 | 12.51 | -25004.80 | 16.07 | -24967.22 | 20.62 | -24948.13 | 23.19 |
| -25153.36 | -0.34 | -25115.34 | 4.65 | -25079.51 | 7.44  | -25039.60 | 14.31 | -25006.39 | 14.49 | -24965.25 | 22.58 | -24951.09 | 20.23 |
| -25153.47 | -0.44 | -25116.83 | 3.15 | -25078.43 | 8.52  | -25041.63 | 12.28 | -25006.71 | 14.17 | -24965.62 | 22.22 | -24950.43 | 20.89 |
| -25154.07 | -1.04 | -25114.88 | 5.11 | -25079.95 | 7.00  | -25041.33 | 12.58 | -25006.50 | 14.38 | -24968.23 | 19.61 | -24945.37 | 25.95 |
| -25154.18 | -1.15 | -25115.60 | 4.39 | -25079.49 | 7.46  | -25043.59 | 10.32 | -25002.87 | 18.00 | -24966.85 | 20.99 | -24944.99 | 26.33 |
| -25154.15 | -1.13 | -25114.44 | 5.55 | -25076.71 | 10.24 | -25043.22 | 10.69 | -25004.17 | 16.71 | -24964.16 | 23.68 | -24951.22 | 20.10 |
| -25153.33 | -0.30 | -25116.20 | 3.78 | -25078.29 | 8.66  | -25040.70 | 13.22 | -25007.14 | 13.73 | -24964.14 | 23.70 | -24944.82 | 26.50 |
| -25154.18 | -1.15 | -25116.96 | 3.03 | -25077.48 | 9.47  | -25042.85 | 11.06 | -25001.48 | 19.39 | -24967.65 | 20.18 | -24942.64 | 28.68 |
| -25153.40 | -0.38 | -25115.81 | 4.18 | -25079.85 | 7.10  | -25037.06 | 16.85 | -25007.68 | 13.20 | -24962.54 | 25.30 | -24950.03 | 21.29 |
| -25153.45 | -0.43 | -25115.08 | 4.91 | -25078.68 | 8.27  | -25039.51 | 14.41 | -25005.95 | 14.93 | -24965.62 | 22.22 | -24948.70 | 22.62 |
| -25153.72 | -0.70 | -25117.01 | 2.98 | -25078.35 | 8.60  | -25037.01 | 16.91 | -25005.78 | 15.09 | -24965.08 | 22.76 | -24949.96 | 21.36 |
| -25153.65 | -0.62 | -25117.34 | 2.64 | -25079.14 | 7.81  | -25041.26 | 12.65 | -25002.40 | 18.48 | -24967.98 | 19.86 | -24947.07 | 24.25 |
| -25154.67 | -1.65 | -25113.44 | 6.55 | -25078.54 | 8.41  | -25042.79 | 11.12 | -25001.71 | 19.16 | -24967.12 | 20.72 | -24949.17 | 22.15 |
| -25154.08 | -1.05 | -25114.67 | 5.32 | -25075.31 | 11.64 | -25044.42 | 9.50  | -25001.51 | 19.37 | -24966.14 | 21.70 | -24948.09 | 23.23 |
| -25153.67 | -0.65 | -25114.22 | 5.77 | -25078.96 | 7.99  | -25040.36 | 13.55 | -25001.91 | 18.96 | -24967.40 | 20.44 | -24947.14 | 24.18 |
| -25154.09 | -1.07 | -25115.59 | 4.40 | -25078.78 | 8.17  | -25043.73 | 10.18 | -25004.67 | 16.21 | -24965.02 | 22.82 | -24946.50 | 24.82 |
| -25153.15 | -0.12 | -25117.12 | 2.87 | -25078.47 | 8.48  | -25042.33 | 11.58 | -25004.29 | 16.59 | -24968.11 | 19.73 | -24938.50 | 32.82 |
| -25155.10 | -2.08 | -25116.71 | 3.28 | -25080.69 | 6.26  | -25039.91 | 14.00 | -25004.50 | 16.37 | -24969.58 | 18.26 | -24946.35 | 24.97 |
| -25154.23 | -1.21 | -25114.79 | 5.20 | -25078.39 | 8.56  | -25042.25 | 11.66 | -25005.60 | 15.28 | -24961.73 | 26.11 | -24944.92 | 26.40 |
| -25154.25 | -1.22 | -25115.54 | 4.45 | -25078.91 | 8.04  | -25037.50 | 16.42 | -25006.55 | 14.33 | -24965.74 | 22.10 | -24942.23 | 29.09 |
| -25151.97 | 1.05  | -25117.31 | 2.67 | -25078.37 | 8.58  | -25042.26 | 11.65 | -25005.64 | 15.23 | -24966.16 | 21.67 | -24948.38 | 22.94 |
| -25153.31 | -0.28 | -25117.17 | 2.82 | -25080.52 | 6.43  | -25042.55 | 11.36 | -25003.52 | 17.35 | -24966.14 | 21.70 | -24952.27 | 19.05 |
| -25153.71 | -0.68 | -25116.23 | 3.76 | -25079.75 | 7.20  | -25041.96 | 11.95 | -25003.24 | 17.63 | -24958.34 | 29.49 | -24947.27 | 24.05 |
| -25154.20 | -1.18 | -25115.71 | 4.28 | -25077.46 | 9.49  | -25035.09 | 18.82 | -25005.65 | 15.22 | -24964.09 | 23.75 | -24947.88 | 23.44 |
| -25152.78 | 0.24  | -25116.91 | 3.07 | -25078.80 | 8.15  | -25038.61 | 15.31 | -25005.23 | 15.65 | -24967.83 | 20.01 | -24950.64 | 20.68 |
| -25153.34 | -0.32 | -25118.36 | 1.63 | -25077.68 | 9.27  | -25038.64 | 15.28 | -24998.73 | 22.14 | -24967.77 | 20.07 | -24948.35 | 22.97 |
| -25153.95 | -0.93 | -25117.03 | 2.96 | -25080.69 | 6.26  | -25041.52 | 12.39 | -25004.25 | 16.62 | -24967.44 | 20.40 | -24949.46 | 21.86 |
| -25153.32 | -0.30 | -25112.91 | 7.08 | -25078.31 | 8.64  | -25038.90 | 15.01 | -25000.88 | 20.00 | -24966.42 | 21.42 | -24946.31 | 25.01 |
| -25154.62 | -1.60 | -25117.17 | 2.82 | -25079.32 | 7.63  | -25042.82 | 11.09 | -25007.80 | 13.07 | -24967.44 | 20.40 | -24948.25 | 23.07 |



|           |       |           |      |           |       |           |       |           |       |           |       |           |        |
|-----------|-------|-----------|------|-----------|-------|-----------|-------|-----------|-------|-----------|-------|-----------|--------|
| -25153.96 | -0.94 | -25117.76 | 2.23 | -25078.37 | 8.58  | -25038.23 | 15.68 | -25002.80 | 18.08 | -24964.77 | 23.07 | -24950.00 | 21.32  |
| -25152.73 | 0.29  | -25116.03 | 3.96 | -25078.52 | 8.43  | -25041.76 | 12.15 | -25001.62 | 19.26 | -24966.59 | 21.25 | -24944.66 | 26.66  |
| -25155.12 | -2.10 | -25116.32 | 3.66 | -25077.99 | 8.96  | -25041.89 | 12.02 | -25004.48 | 16.40 | -24959.99 | 27.85 | -24949.02 | 22.30  |
| -25152.68 | 0.35  | -25117.10 | 2.88 | -25079.26 | 7.69  | -25039.51 | 14.40 | -25001.98 | 18.90 | -24964.95 | 22.89 | -24945.52 | 25.80  |
| -25155.02 | -1.99 | -25117.62 | 2.37 | -25079.72 | 7.23  | -25042.93 | 10.98 | -25004.99 | 15.88 | -24964.01 | 23.83 | -24948.70 | 22.62  |
| -25153.45 | -0.43 | -25116.94 | 3.05 | -25078.15 | 8.80  | -25041.83 | 12.09 | -24999.54 | 21.33 | -24963.81 | 24.03 | -24944.25 | 27.07  |
| -25154.18 | -1.15 | -25116.84 | 3.15 | -25078.02 | 8.93  | -25040.15 | 13.77 | -25007.89 | 12.99 | -24965.11 | 22.73 | -24946.36 | 24.96  |
| -25154.44 | -1.42 | -25114.90 | 5.09 | -25078.19 | 8.76  | -25040.75 | 13.16 | -25003.14 | 17.73 | -24966.55 | 21.29 | -24949.76 | 21.56  |
| -25153.13 | -0.10 | -25116.82 | 3.17 | -25079.95 | 7.00  | -25042.58 | 11.34 | -25003.12 | 17.76 | -24968.68 | 19.16 | -24949.04 | 22.28  |
| -25154.52 | -1.49 | -25117.81 | 2.18 | -25081.59 | 5.36  | -25043.44 | 10.48 | -25006.07 | 14.81 | -24967.17 | 20.67 | -24948.49 | 22.83  |
| -25154.19 | -1.16 | -25115.95 | 4.04 | -25080.05 | 6.90  | -25040.74 | 13.18 | -25004.88 | 15.99 | -24963.63 | 24.21 | -24949.80 | 21.52  |
| -25154.04 | -1.02 | -25115.34 | 4.65 | -25072.63 | 14.32 | -25042.79 | 11.13 | -25002.80 | 18.08 | -24966.69 | 21.14 | -24952.62 | 18.70  |
| -25154.07 | -1.05 | -25116.31 | 3.68 | -25079.02 | 7.93  | -25038.59 | 15.33 | -25001.54 | 19.34 | -24967.78 | 20.06 | -24949.32 | 22.00  |
| -25154.20 | -1.17 | -25116.07 | 3.92 | -25081.75 | 5.20  | -25041.16 | 12.76 | -25002.23 | 18.65 | -24966.41 | 21.43 | -24944.27 | 27.05  |
| -25154.47 | -1.45 | -25115.15 | 4.84 | -25076.61 | 10.34 | -25038.64 | 15.28 | -25003.41 | 17.47 | -24968.36 | 19.48 | -24948.49 | 22.83  |
| -25154.30 | -1.27 | -25116.75 | 3.24 | -25081.04 | 5.91  | -25043.04 | 10.88 | -25005.26 | 15.62 | -24961.10 | 26.74 | -24946.88 | 24.44  |
| -25154.24 | -1.21 | -25115.66 | 4.33 | -25080.70 | 6.25  | -25041.89 | 12.02 | -25003.52 | 17.35 | -24969.31 | 18.53 | -24949.96 | 21.35  |
| -25153.52 | -0.50 | -25116.83 | 3.16 | -25079.42 | 7.53  | -25039.69 | 14.23 | -25000.70 | 20.18 | -24967.55 | 20.28 | -24948.20 | 23.12  |
| -25154.04 | -1.01 | -25116.15 | 3.84 | -25077.69 | 9.26  | -25044.74 | 9.17  | -25002.73 | 18.15 | -24966.89 | 20.95 | -24951.38 | 19.94  |
| -25153.20 | -0.17 | -25116.33 | 3.66 | -25078.95 | 8.00  | -25039.74 | 14.17 | -25004.89 | 15.99 | -24968.47 | 19.37 | -24940.72 | 30.60  |
| -25153.93 | -0.90 | -25114.02 | 5.97 | -25074.85 | 12.10 | -25041.83 | 12.08 | -25002.60 | 18.28 | -24968.90 | 18.93 | -24947.20 | 24.12  |
| -25154.37 | -1.35 | -25115.51 | 4.47 | -25079.46 | 7.49  | -25040.94 | 12.97 | -25004.50 | 16.37 | -24963.66 | 24.18 | -24942.28 | 29.04  |
| -25154.52 | -1.49 | -25117.45 | 2.54 | -25079.04 | 7.91  | -25040.74 | 13.17 | -25005.39 | 15.49 | -24963.88 | 23.96 | -24936.46 | 34.86  |
| -25152.56 | 0.47  | -25116.39 | 3.60 | -25079.96 | 7.00  | -25041.90 | 12.01 | -25006.19 | 14.69 | -24964.66 | 23.18 | -24948.24 | 23.08  |
| -25152.41 | 0.61  | -25114.18 | 5.81 | -25076.05 | 10.90 | -25039.24 | 14.67 | -25004.42 | 16.46 | -24967.81 | 20.02 | -24942.95 | 28.37  |
| -25154.61 | -1.58 | -25113.69 | 6.30 | -25077.09 | 9.86  | -25042.25 | 11.66 | -25007.95 | 12.92 | -24969.14 | 18.70 | -24944.62 | 26.70  |
| -25152.70 | 0.32  | -25116.02 | 3.96 | -25077.99 | 8.96  | -25037.15 | 16.76 | -25001.46 | 19.42 | -24963.34 | 24.50 | -24950.45 | 20.87  |
| -25153.66 | -0.63 | -25116.19 | 3.80 | -25080.08 | 6.87  | -25039.13 | 14.78 | -25006.64 | 14.23 | -24961.03 | 26.81 | -24946.86 | 24.46  |
| -25153.68 | -0.65 | -25116.16 | 3.83 | -25079.62 | 7.33  | -25042.08 | 11.84 | -25003.84 | 17.04 | -24966.47 | 21.37 | -24984.46 | -13.14 |
| -25153.62 | -0.59 | -25116.73 | 3.26 | -25077.92 | 9.03  | -25040.61 | 13.30 | -25004.14 | 16.73 | -24967.08 | 20.76 | -24947.88 | 23.44  |
| -25153.88 | -0.86 | -25114.24 | 5.75 | -25079.34 | 7.61  | -25041.23 | 12.68 | -25005.94 | 14.94 | -24967.22 | 20.62 | -24946.24 | 25.08  |
| -25152.72 | 0.30  | -25116.46 | 3.53 | -25080.17 | 6.78  | -25042.20 | 11.71 | -25006.39 | 14.49 | -24966.26 | 21.58 | -24940.86 | 30.46  |
| -25154.35 | -1.32 | -25114.57 | 5.42 | -25079.95 | 7.00  | -25043.23 | 10.69 | -24998.97 | 21.91 | -24964.15 | 23.69 | -24950.68 | 20.64  |
| -25153.84 | -0.82 | -25116.88 | 3.11 | -25077.89 | 9.06  | -25042.37 | 11.54 | -25000.10 | 20.77 | -24966.08 | 21.76 | -24949.45 | 21.87  |
| -25153.45 | -0.43 | -25116.20 | 3.79 | -25079.07 | 7.88  | -25040.51 | 13.41 | -25004.82 | 16.05 | -24968.66 | 19.18 | -24942.80 | 28.52  |
| -25153.54 | -0.51 | -25117.12 | 2.87 | -25079.67 | 7.28  | -25041.77 | 12.14 | -25003.54 | 17.34 | -24966.63 | 21.21 | -24947.38 | 23.94  |
| -25153.50 | -0.48 | -25118.89 | 1.09 | -25077.86 | 9.09  | -25041.36 | 12.55 | -25002.88 | 18.00 | -24967.94 | 19.90 | -24949.76 | 21.56  |
| -25154.23 | -1.21 | -25115.55 | 4.44 | -25078.63 | 8.32  | -25042.47 | 11.44 | -25004.08 | 16.80 | -24964.14 | 23.70 | -24947.39 | 23.93  |
| -25153.90 | -0.88 | -25114.99 | 5.00 | -25076.90 | 10.05 | -25042.42 | 11.49 | -25003.01 | 17.87 | -24967.82 | 20.02 | -24947.11 | 24.21  |
| -25154.07 | -1.04 | -25116.88 | 3.11 | -25079.28 | 7.67  | -25038.10 | 15.82 | -25006.46 | 14.42 | -24967.21 | 20.63 | -24944.74 | 26.58  |
| -25154.24 | -1.21 | -25115.71 | 4.28 | -25079.01 | 7.94  | -25039.95 | 13.97 | -25007.71 | 13.17 | -24965.43 | 22.41 | -24946.39 | 24.93  |

|           |       |           |      |           |       |           |       |           |       |           |       |           |       |
|-----------|-------|-----------|------|-----------|-------|-----------|-------|-----------|-------|-----------|-------|-----------|-------|
| -25153.92 | -0.90 | -25117.53 | 2.46 | -25079.81 | 7.14  | -25036.99 | 16.92 | -25005.37 | 15.50 | -24967.16 | 20.68 | -24949.37 | 21.95 |
| -25154.27 | -1.24 | -25115.27 | 4.72 | -25077.83 | 9.12  | -25042.69 | 11.23 | -25003.31 | 17.57 | -24966.64 | 21.19 | -24946.08 | 25.24 |
| -25153.19 | -0.16 | -25117.66 | 2.33 | -25078.48 | 8.47  | -25040.71 | 13.20 | -25000.36 | 20.52 | -24967.11 | 20.72 | -24943.87 | 27.45 |
| -25153.80 | -0.78 | -25116.01 | 3.98 | -25078.69 | 8.26  | -25038.62 | 15.29 | -25005.20 | 15.68 | -24967.44 | 20.40 | -24946.54 | 24.78 |
| -25153.45 | -0.42 | -25113.66 | 6.33 | -25075.85 | 11.10 | -25039.15 | 14.76 | -25003.13 | 17.75 | -24968.29 | 19.54 | -24945.22 | 26.10 |
| -25153.90 | -0.88 | -25114.37 | 5.62 | -25078.92 | 8.03  | -25041.72 | 12.19 | -25003.79 | 17.08 | -24967.56 | 20.27 | -24943.01 | 28.31 |
| -25153.62 | -0.60 | -25116.98 | 3.01 | -25076.66 | 10.29 | -25039.86 | 14.05 | -25004.37 | 16.50 | -24961.12 | 26.72 | -24950.45 | 20.87 |
| -25154.07 | -1.04 | -25116.29 | 3.70 | -25079.27 | 7.68  |           |       | -25001.82 | 19.06 | -24968.14 | 19.70 |           |       |
| -25153.81 | -0.79 | -25115.93 | 4.06 | -25075.68 | 11.27 |           |       | -25004.37 | 16.51 |           |       |           |       |
| -25153.72 | -0.69 | -25117.74 | 2.24 | -25078.95 | 8.00  |           |       | -25006.50 | 14.37 |           |       |           |       |
| -25153.02 | 0.00  | -25117.49 | 2.49 |           |       |           |       | -25004.92 | 15.96 |           |       |           |       |
| -25153.88 | -0.86 | -25116.44 | 3.55 |           |       |           |       | -25001.38 | 19.50 |           |       |           |       |
| -25153.75 | -0.72 |           |      |           |       |           |       | -25006.06 | 14.82 |           |       |           |       |
| -25153.17 | -0.14 |           |      |           |       |           |       |           |       |           |       |           |       |
| -25154.61 | -1.58 |           |      |           |       |           |       |           |       |           |       |           |       |
| -25154.39 | -1.37 |           |      |           |       |           |       |           |       |           |       |           |       |

Average energies

|           |       |           |      |           |      |           |       |           |       |           |       |           |       |
|-----------|-------|-----------|------|-----------|------|-----------|-------|-----------|-------|-----------|-------|-----------|-------|
| -25153.82 | -0.79 | -25116.20 | 3.79 | -25079.01 | 7.94 | -25040.99 | 12.93 | -25003.93 | 16.95 | -24966.01 | 21.83 | -24947.59 | 23.73 |
|-----------|-------|-----------|------|-----------|------|-----------|-------|-----------|-------|-----------|-------|-----------|-------|

## U

concentration in solid solution (%)  
number of atoms

|           | ground<br>state<br>energy | solid<br>solution<br>energy |       |           |       |           |       |           |       |           |       |           |       |
|-----------|---------------------------|-----------------------------|-------|-----------|-------|-----------|-------|-----------|-------|-----------|-------|-----------|-------|
|           | 3                         | 6                           |       | 9         |       | 12        |       | 15        |       | 18        |       | 21        |       |
|           | 2                         | 4                           |       | 6         |       | 8         |       | 10        |       | 12        |       | 13        |       |
| -25156.26 | 1.79                      | -25126.65                   | 3.38  | -25095.44 | 6.57  | -25062.24 | 11.75 | -25025.98 | 19.99 | -24997.81 | 20.14 | -24977.46 | 26.48 |
| -25157.70 | 0.34                      | -25125.08                   | 4.94  | -25093.82 | 8.18  | -25062.52 | 11.46 | -25026.82 | 19.14 | -25000.57 | 17.38 | -24973.96 | 29.98 |
| -25158.71 | -0.67                     | -25124.81                   | 5.22  | -25095.27 | 6.73  | -25062.56 | 11.43 | -25031.39 | 14.58 | -24991.32 | 26.63 | -24975.24 | 28.70 |
| -25158.91 | -0.87                     | -25124.00                   | 6.02  | -25092.99 | 9.01  | -25061.01 | 12.98 | -25027.72 | 18.25 | -24993.74 | 24.21 | -24977.54 | 26.41 |
| -25148.31 | 9.73                      | -25125.38                   | 4.64  | -25092.16 | 9.85  | -25062.99 | 11.00 | -25030.48 | 15.49 | -25001.72 | 16.23 | -24981.69 | 22.25 |
| -25157.41 | 0.63                      | -25125.67                   | 4.36  | -25091.07 | 10.93 | -25062.98 | 11.01 | -25030.25 | 15.72 | -24998.02 | 19.93 | -24981.33 | 22.61 |
| -25156.65 | 1.39                      | -25123.08                   | 6.94  | -25093.03 | 8.98  | -25058.06 | 15.93 | -25025.80 | 20.17 | -24995.20 | 22.75 | -24984.83 | 19.11 |
| -25149.06 | 8.98                      | -25123.05                   | 6.98  | -25092.82 | 9.19  | -25063.43 | 10.56 | -25030.18 | 15.79 | -25000.43 | 17.52 | -24981.20 | 22.75 |
| -25158.67 | -0.62                     | -25108.92                   | 21.10 | -25095.76 | 6.25  | -25058.48 | 15.51 | -25028.60 | 17.37 | -24999.10 | 18.86 | -24982.08 | 21.86 |
| -25148.43 | 9.61                      | -25123.98                   | 6.04  | -25093.35 | 8.66  | -25060.84 | 13.15 | -25029.54 | 16.43 | -24999.00 | 18.95 | -24980.23 | 23.71 |
| -25156.05 | 1.99                      | -25124.58                   | 5.44  | -25093.64 | 8.37  | -25059.49 | 14.50 | -25030.64 | 15.33 | -24994.85 | 23.11 | -24984.02 | 19.92 |
| -25158.98 | -0.93                     | -25124.19                   | 5.84  | -25092.94 | 9.07  | -25062.61 | 11.38 | -25028.51 | 17.46 | -24993.87 | 24.08 | -24973.82 | 30.12 |
| -25155.02 | 3.03                      | -25124.89                   | 5.13  | -25093.51 | 8.50  | -25060.08 | 13.91 | -25029.05 | 16.91 | -24997.95 | 20.00 | -24978.73 | 25.22 |
| -25157.78 | 0.27                      | -25125.34                   | 4.68  | -25091.16 | 10.84 | -25061.68 | 12.30 | -25032.90 | 13.07 | -24998.66 | 19.29 | -24981.57 | 22.37 |
| -25158.72 | -0.68                     | -25127.92                   | 2.10  | -25093.51 | 8.49  | -25062.37 | 11.61 | -25025.61 | 20.35 | -24998.65 | 19.30 | -24978.48 | 25.46 |
| -25158.82 | -0.78                     | -25124.92                   | 5.10  | -25096.10 | 5.91  | -25062.63 | 11.36 | -25032.62 | 13.35 | -24998.08 | 19.87 | -24981.38 | 22.56 |

|           |       |           |      |           |       |           |       |           |       |           |       |           |       |
|-----------|-------|-----------|------|-----------|-------|-----------|-------|-----------|-------|-----------|-------|-----------|-------|
| -25148.10 | 9.95  | -25125.55 | 4.47 | -25093.70 | 8.31  | -25056.74 | 17.25 | -25030.98 | 14.99 | -24996.68 | 21.27 | -24981.61 | 22.33 |
| -25158.20 | -0.16 | -25126.13 | 3.90 | -25096.17 | 5.84  | -25061.10 | 12.89 | -25028.17 | 17.80 | -24998.03 | 19.92 | -24975.47 | 28.47 |
| -25157.90 | 0.14  | -25122.36 | 7.66 | -25095.49 | 6.52  | -25062.21 | 11.78 | -25026.41 | 19.56 | -24994.21 | 23.74 | -24972.24 | 31.70 |
| -25158.65 | -0.60 | -25124.25 | 5.77 | -25093.88 | 8.13  | -25061.39 | 12.60 | -25028.17 | 17.80 | -25000.36 | 17.59 | -24968.86 | 35.08 |
| -25159.16 | -1.11 | -25125.96 | 4.07 | -25094.55 | 7.45  | -25058.43 | 15.56 | -25025.80 | 20.17 | -24997.13 | 20.82 | -24980.24 | 23.70 |
| -25159.30 | -1.26 | -25126.82 | 3.21 | -25093.22 | 8.78  | -25060.84 | 13.15 | -25028.40 | 17.57 | -24998.73 | 19.23 | -24983.03 | 20.91 |
| -25157.32 | 0.72  | -25125.67 | 4.36 | -25096.04 | 5.97  | -25061.20 | 12.78 | -25028.98 | 16.99 | -24996.20 | 21.75 | -24982.27 | 21.67 |
| -25148.24 | 9.81  | -25123.73 | 6.29 | -25092.98 | 9.02  | -25059.00 | 14.99 | -25030.73 | 15.24 | -24996.44 | 21.51 | -24981.72 | 22.22 |
| -25157.87 | 0.17  | -25124.01 | 6.01 | -25093.85 | 8.16  | -25061.43 | 12.56 | -25028.69 | 17.28 | -24997.87 | 20.08 | -24983.45 | 20.49 |
| -25158.00 | 0.05  | -25123.30 | 6.72 | -25093.72 | 8.29  | -25062.80 | 11.19 | -25025.89 | 20.08 | -24995.73 | 22.22 | -24980.65 | 23.30 |
| -25157.28 | 0.77  | -25125.24 | 4.79 | -25091.08 | 10.92 | -25061.95 | 12.03 | -25028.23 | 17.74 | -24996.39 | 21.56 | -24981.36 | 22.58 |
| -25158.43 | -0.38 | -25124.06 | 5.97 | -25091.63 | 10.38 | -25062.98 | 11.01 | -25028.71 | 17.26 | -24997.91 | 20.04 | -24981.74 | 22.20 |
| -25156.44 | 1.60  | -25122.13 | 7.89 | -25093.00 | 9.00  | -25060.81 | 13.17 | -25029.81 | 16.16 | -24999.45 | 18.50 | -24980.07 | 23.87 |
| -25158.05 | 0.00  | -25123.90 | 6.13 | -25094.43 | 7.57  | -25065.31 | 8.68  | -25030.31 | 15.66 | -24996.71 | 21.24 | -24980.99 | 22.95 |
| -25157.71 | 0.33  | -25125.02 | 5.00 | -25094.93 | 7.07  | -25059.68 | 14.31 | -25032.15 | 13.82 | -24999.16 | 18.79 | -24982.80 | 21.14 |
| -25158.36 | -0.31 | -25125.84 | 4.18 | -25093.22 | 8.78  | -25061.70 | 12.29 | -25029.38 | 16.59 | -24995.63 | 22.32 | -24977.87 | 26.07 |
| -25158.14 | -0.10 | -25125.90 | 4.12 | -25094.41 | 7.60  | -25059.39 | 14.59 | -25029.36 | 16.61 | -24994.35 | 23.60 | -24982.75 | 21.19 |
| -25157.21 | 0.84  | -25125.87 | 4.16 | -25095.00 | 7.00  | -25061.79 | 12.20 | -25033.64 | 12.33 | -25000.88 | 17.07 | -24983.01 | 20.93 |
| -25157.69 | 0.35  | -25126.40 | 3.63 | -25096.37 | 5.64  | -25063.28 | 10.71 | -25026.80 | 19.17 | -24998.85 | 19.10 | -24981.58 | 22.36 |
| -25157.90 | 0.14  | -25126.00 | 4.03 | -25092.36 | 9.65  | -25062.35 | 11.64 | -25025.97 | 20.00 | -24995.39 | 22.56 | -24977.84 | 26.10 |
| -25158.76 | -0.71 | -25124.23 | 5.80 | -25094.95 | 7.06  | -25059.85 | 14.13 | -25029.03 | 16.94 | -24993.62 | 24.34 | -24983.80 | 20.14 |
| -25149.93 | 8.12  | -25126.06 | 3.97 | -25093.88 | 8.13  | -25059.03 | 14.96 | -25027.97 | 18.00 | -25000.11 | 17.84 | -24979.86 | 24.09 |
| -25156.29 | 1.75  | -25123.72 | 6.30 | -25095.54 | 6.47  | -25061.55 | 12.43 | -25030.50 | 15.47 | -24996.01 | 21.94 | -24982.47 | 21.47 |
| -25147.73 | 10.31 | -25122.81 | 7.22 | -25092.91 | 9.09  | -25061.54 | 12.45 | -25030.48 | 15.49 | -24999.33 | 18.62 | -24978.97 | 24.97 |
| -25156.72 | 1.32  | -25127.35 | 2.68 | -25094.05 | 7.96  | -25060.11 | 13.88 | -25029.84 | 16.13 | -24996.85 | 21.11 | -24982.45 | 21.49 |
| -25156.94 | 1.11  | -25125.92 | 4.10 | -25091.55 | 10.46 | -25058.46 | 15.53 | -25021.05 | 24.92 | -25000.10 | 17.85 | -24978.72 | 25.22 |
| -25147.77 | 10.28 | -25124.51 | 5.51 | -25096.73 | 5.28  | -25060.67 | 13.32 | -25027.25 | 18.72 | -24999.87 | 18.08 | -24980.68 | 23.26 |
| -25158.71 | -0.66 | -25125.58 | 4.45 | -25094.08 | 7.92  | -25061.46 | 12.53 | -25033.18 | 12.79 | -24995.02 | 22.93 | -24978.97 | 24.97 |
| -25158.79 | -0.74 | -25124.94 | 5.08 | -25091.94 | 10.07 | -25058.94 | 15.05 | -25029.99 | 15.98 | -24996.86 | 21.09 | -24983.94 | 20.01 |
| -25148.65 | 9.40  | -25123.31 | 6.71 | -25092.82 | 9.19  | -25059.54 | 14.45 | -25022.09 | 23.88 | -24988.48 | 29.48 | -24979.64 | 24.30 |
| -25158.73 | -0.69 | -25123.81 | 6.21 | -25093.43 | 8.57  | -25064.63 | 9.35  | -25031.70 | 14.27 | -24996.99 | 20.97 | -24981.07 | 22.87 |
| -25158.31 | -0.27 | -25125.04 | 4.98 | -25094.85 | 7.15  | -25062.21 | 11.78 | -25031.98 | 13.99 | -24996.01 | 21.94 | -24983.92 | 20.02 |
| -25158.81 | -0.76 | -25125.69 | 4.33 | -25093.87 | 8.14  | -25053.76 | 20.22 | -25030.39 | 15.58 | -24995.75 | 22.20 | -24978.68 | 25.26 |
| -25158.28 | -0.23 | -25126.28 | 3.74 | -25094.03 | 7.98  | -25048.17 | 25.82 | -25029.16 | 16.81 | -24999.46 | 18.49 | -24981.28 | 22.66 |
| -25147.70 | 10.35 | -25126.05 | 3.98 | -25089.28 | 12.73 | -25060.49 | 13.50 | -25029.27 | 16.70 | -24992.14 | 25.81 | -24980.21 | 23.73 |
|           |       | -25125.99 | 4.04 | -25094.88 | 7.13  | -25060.52 | 13.46 | -25031.98 | 13.99 | -24996.69 | 21.26 | -24979.87 | 24.07 |
|           |       | -25125.08 | 4.94 | -25093.90 | 8.11  | -25060.57 | 13.41 | -25029.53 | 16.44 | -24999.94 | 18.01 | -24978.09 | 25.85 |
|           |       | -25124.63 | 5.40 | -25093.19 | 8.81  | -25063.75 | 10.24 | -25024.99 | 20.98 | -24997.90 | 20.05 | -24985.06 | 18.88 |
|           |       | -25125.11 | 4.91 |           |       | -25061.36 | 12.63 | -25029.75 | 16.21 | -25000.73 | 17.23 | -24978.48 | 25.46 |
|           |       | -25125.97 | 4.06 | -25093.65 | 8.36  | -25062.91 | 11.08 | -25029.18 | 16.79 | -24992.98 | 24.97 | -24985.59 | 18.35 |
|           |       | -25125.51 | 4.52 | -25093.50 | 8.51  | -25062.80 | 11.18 | -25028.04 | 17.93 | -24996.43 | 21.52 | -24975.78 | 28.16 |

|           |                 |                |                 |                 |                 |       |
|-----------|-----------------|----------------|-----------------|-----------------|-----------------|-------|
| -25115.85 | 14.17 -25092.82 | 9.18 -25059.57 | 14.42 -25025.89 | 20.08 -24996.45 | 21.50 -24982.60 | 21.34 |
| -25124.76 | 5.26 -25093.30  | 8.70 -25059.27 | 14.71 -25029.14 | 16.83 -24999.46 | 18.49 -24977.93 | 26.02 |
| -25125.71 | 4.32 -25093.98  | 8.03 -25061.81 | 12.18 -25028.24 | 17.73 -24996.52 | 21.43 -24979.01 | 24.93 |
| -25123.80 | 6.22 -25092.07  | 9.93 -25061.65 | 12.33           | -24998.50       | 19.45 -24981.17 | 22.77 |
| -25124.38 | 5.65 -25094.47  | 7.53 -25062.27 | 11.71           | -24999.62       | 18.33 -24978.67 | 25.28 |
| -25124.87 | 5.15 -25095.45  | 6.56           |                 | -24997.00       | 20.95 -24979.41 | 24.53 |
| -25125.37 | 4.66 -25092.41  | 9.59           |                 | -25001.58       | 16.37 -24980.75 | 23.19 |
| -25123.08 | 6.95 -25092.65  | 9.36           |                 | -24997.71       | 20.24           |       |
| -25124.92 | 5.11 -25094.64  | 7.37           |                 | -24997.00       | 20.95           |       |
| -25125.57 | 4.46            |                |                 | -24997.43       | 20.52           |       |
| -25127.97 | 2.05            |                |                 | -24998.15       | 19.80           |       |
|           |                 |                |                 | -24994.31       | 23.64           |       |
|           |                 |                |                 | -24995.17       | 22.78           |       |
|           |                 |                |                 | -24997.49       | 20.46           |       |
|           |                 |                |                 | -24999.55       | 18.40           |       |
|           |                 |                |                 | -24997.04       | 20.91           |       |
|           |                 |                |                 | -24997.71       | 20.25           |       |
|           |                 |                |                 | -24999.26       | 18.69           |       |
|           |                 |                |                 | -24995.84       | 22.11           |       |
|           |                 |                |                 | -24997.87       | 20.08           |       |
|           |                 |                |                 | -24996.71       | 21.24           |       |

Average energies      -25153.82      -0.79 -25116.20      3.79 -25079.01      7.94 -25040.99      12.93 -25003.93      16.95 -24966.01      21.83 -24947.59      23.73

# Ca<sub>1-x</sub>M<sub>x</sub>ZrTi<sub>2-2x</sub>Al<sub>2x</sub>O<sub>7</sub> M=(Ce, Pu, Th, U)

## Ti(2)Ti(2)

N.B. All stated energies are in eV

| Ce                                  | ground | solid     |       | ground    |        | solid     |        | ground    |        | solid     |        | ground    |        | solid    |  |
|-------------------------------------|--------|-----------|-------|-----------|--------|-----------|--------|-----------|--------|-----------|--------|-----------|--------|----------|--|
|                                     | state  | solution  |       | state     |        | solution  |        | state     |        | solution  |        | state     |        | solution |  |
| energy                              | energy | energy    |       | energy    |        | energy    |        | energy    |        | energy    |        | energy    |        | energy   |  |
| concentration in solid solution (%) | 3      | 6         |       | 9         |        | 12        |        | 15        |        | 18        |        | 21        |        |          |  |
| number of atoms                     | 2      | 4         |       | 6         |        | 8         |        | 10        |        | 12        |        | 13        |        |          |  |
| -25159.61                           | -6.23  | -25128.62 | -7.93 | -25098.35 | -10.33 | -25064.60 | -9.26  | -25034.56 | -11.91 | -25006.68 | -16.71 | -24965.69 | 7.94   |          |  |
| -25161.00                           | -7.62  | -25128.81 | -8.11 | -25094.29 | -6.27  | -25068.61 | -13.28 | -25035.83 | -13.18 | -25004.75 | -14.78 | -24985.81 | -12.18 |          |  |
| -25158.98                           | -5.60  | -25127.06 | -6.36 | -25097.81 | -9.79  | -25066.09 | -10.75 | -25032.79 | -10.14 | -25006.83 | -16.86 | -24965.51 | 8.12   |          |  |
| -25157.99                           | -4.61  | -25127.56 | -6.86 | -25095.62 | -7.60  | -25065.02 | -9.69  | -25030.49 | -7.83  | -25004.32 | -14.35 | -24987.97 | -14.34 |          |  |
| -25158.70                           | -5.32  | -25127.45 | -6.75 | -25096.66 | -8.65  | -25064.01 | -8.67  | -25036.68 | -14.03 | -25005.17 | -15.21 | -24961.01 | 12.62  |          |  |
| -25159.30                           | -5.92  | -25127.36 | -6.67 | -25096.86 | -8.85  | -25067.81 | -12.48 | -25031.19 | -8.54  | -25003.33 | -13.36 | -24988.62 | -14.99 |          |  |
| -25159.61                           | -6.23  | -25126.86 | -6.17 | -25097.08 | -9.07  | -25066.67 | -11.34 | -25034.81 | -12.16 | -25006.87 | -16.91 | -24992.02 | -18.40 |          |  |
| -25160.27                           | -6.89  | -25125.83 | -5.14 | -25095.57 | -7.56  | -25065.65 | -10.32 | -25034.20 | -11.55 | -25001.63 | -11.66 | -24989.43 | -15.80 |          |  |
| -25159.48                           | -6.10  | -25128.87 | -8.17 | -25096.51 | -8.49  | -25063.34 | -8.01  | -25035.26 | -12.61 | -25007.71 | -17.75 | -24964.16 | 9.47   |          |  |
| -25159.55                           | -6.17  | -25128.03 | -7.33 | -25097.72 | -9.71  | -25063.31 | -7.98  | -25034.90 | -12.25 | -25005.47 | -15.50 | -24965.46 | 8.17   |          |  |
| -25159.99                           | -6.61  | -25127.98 | -7.29 | -25097.75 | -9.73  | -25065.42 | -10.09 | -25035.28 | -12.63 | -25006.25 | -16.29 | -24981.56 | -7.94  |          |  |
| -25159.81                           | -6.43  | -25127.20 | -6.51 | -25096.94 | -8.92  | -25064.73 | -9.40  | -25034.22 | -11.56 | -25007.36 | -17.39 | -24968.15 | 5.48   |          |  |
| -25159.03                           | -5.65  | -25128.37 | -7.67 | -25098.07 | -10.06 | -25066.53 | -11.20 | -25036.62 | -13.97 | -25002.82 | -12.85 | -24987.71 | -14.08 |          |  |
| -25160.32                           | -6.94  | -25129.42 | -8.72 | -25096.76 | -8.75  | -25065.59 | -10.25 | -25035.16 | -12.51 | -25002.16 | -12.20 | -24987.62 | -13.99 |          |  |
| -25159.43                           | -6.05  | -25128.89 | -8.19 | -25096.26 | -8.24  | -25067.17 | -11.84 | -25035.60 | -12.95 | -25005.71 | -15.74 | -24990.55 | -16.92 |          |  |
| -25159.87                           | -6.49  | -25128.62 | -7.93 | -25097.38 | -9.36  | -25067.01 | -11.68 | -25032.96 | -10.31 | -25000.83 | -10.86 | -24988.80 | -15.17 |          |  |
| -25159.94                           | -6.56  | -25127.84 | -7.14 | -25096.23 | -8.22  | -25066.58 | -11.24 | -25035.53 | -12.88 | -25005.63 | -15.66 | -24987.61 | -13.98 |          |  |
| -25158.53                           | -5.15  | -25128.34 | -7.64 | -25095.31 | -7.29  | -25063.58 | -8.25  | -25037.11 | -14.46 | -24999.82 | -9.85  | -24990.71 | -17.08 |          |  |
| -25160.81                           | -7.43  | -25127.38 | -6.69 | -25096.67 | -8.66  | -25064.34 | -9.01  | -25033.09 | -10.44 | -25006.08 | -16.11 | -24986.88 | -13.25 |          |  |
| -25159.76                           | -6.38  | -25127.85 | -7.16 | -25095.82 | -7.81  | -25065.24 | -9.91  | -25033.89 | -11.24 | -25004.15 | -14.18 | -24986.53 | -12.90 |          |  |
| -25159.41                           | -6.03  | -25128.59 | -7.90 | -25095.37 | -7.36  | -25066.54 | -11.21 | -25033.50 | -10.85 | -25005.40 | -15.43 | -24989.50 | -15.87 |          |  |
| -25160.01                           | -6.63  | -25123.67 | -2.98 | -25097.42 | -9.41  | -25066.12 | -10.79 | -25036.20 | -13.55 | -24999.34 | -9.37  | -24987.40 | -13.77 |          |  |
| -25159.30                           | -5.92  | -25127.20 | -6.50 | -25092.44 | -4.43  | -25062.89 | -7.56  | -25037.75 | -15.10 | -24998.58 | -8.61  | -24990.75 | -17.12 |          |  |
| -25160.50                           | -7.12  | -25129.43 | -8.74 | -25095.61 | -7.60  | -25065.22 | -9.89  | -25035.77 | -13.12 | -25004.43 | -14.46 | -24988.11 | -14.49 |          |  |
| -25159.38                           | -6.00  | -25129.55 | -8.85 | -25097.45 | -9.44  | -25063.69 | -8.36  | -25034.81 | -12.16 | -25004.31 | -14.34 | -24986.67 | -13.05 |          |  |
| -25159.55                           | -6.18  | -25128.14 | -7.44 | -25096.12 | -8.10  | -25066.42 | -11.09 | -25033.79 | -11.14 | -24999.97 | -10.00 | -24987.32 | -13.69 |          |  |
| -25159.46                           | -6.08  | -25124.40 | -3.70 | -25096.90 | -8.89  | -25065.82 | -10.48 | -25034.93 | -12.28 | -25002.65 | -12.68 | -24993.72 | -20.09 |          |  |
| -25158.69                           | -5.31  | -25125.70 | -5.00 | -25097.15 | -9.13  | -25066.68 | -11.35 | -25035.50 | -12.85 | -25004.08 | -14.11 | -24988.09 | -14.46 |          |  |
| -25160.01                           | -6.63  | -25128.26 | -7.56 | -25095.66 | -7.65  | -25058.94 | -3.61  | -25033.67 | -11.02 | -25006.33 | -16.36 | -24966.09 | 7.54   |          |  |

|           |       |           |       |           |        |           |        |           |        |           |        |           |        |
|-----------|-------|-----------|-------|-----------|--------|-----------|--------|-----------|--------|-----------|--------|-----------|--------|
| -25160.13 | -6.75 | -25128.80 | -8.10 | -25097.03 | -9.01  | -25066.58 | -11.24 | -25032.38 | -9.73  | -25003.72 | -13.75 | -24986.51 | -12.88 |
| -25158.70 | -5.32 | -25128.50 | -7.80 | -25098.09 | -10.08 | -25061.86 | -6.52  | -25034.95 | -12.30 | -25000.07 | -10.10 | -24988.15 | -14.52 |
| -25158.98 | -5.60 | -25128.04 | -7.35 | -25096.30 | -8.28  | -25066.97 | -11.63 | -25037.10 | -14.44 | -25005.32 | -15.35 | -24986.50 | -12.87 |
| -25159.67 | -6.29 | -25128.88 | -8.18 | -25096.06 | -8.05  | -25066.53 | -11.19 | -25032.57 | -9.92  | -25005.40 | -15.43 | -24989.85 | -16.22 |
| -25159.81 | -6.43 | -25127.91 | -7.22 | -25096.32 | -8.31  | -25065.80 | -10.46 | -25030.37 | -7.72  | -25005.30 | -15.33 | -24988.02 | -14.40 |
| -25159.88 | -6.50 | -25126.69 | -5.99 | -25096.14 | -8.12  | -25065.82 | -10.48 | -25033.26 | -10.61 | -25006.07 | -16.10 | -24987.49 | -13.87 |
| -25159.16 | -5.78 | -25126.47 | -5.77 | -25095.34 | -7.32  | -25066.91 | -11.57 | -25033.70 | -11.05 | -25004.60 | -14.64 | -24984.59 | -10.96 |
| -25159.88 | -6.50 | -25128.27 | -7.57 | -25098.12 | -10.11 | -25065.17 | -9.84  | -25035.21 | -12.56 | -25002.44 | -12.47 | -24987.10 | -13.47 |
| -25159.69 | -6.31 | -25130.30 | -9.60 | -25097.90 | -9.88  | -25064.02 | -8.68  | -25035.72 | -13.07 | -25003.51 | -13.54 | -24989.15 | -15.52 |
| -25160.66 | -7.28 | -25129.57 | -8.88 | -25096.19 | -8.18  | -25061.45 | -6.12  | -25037.95 | -15.30 | -25003.56 | -13.59 | -24990.34 | -16.71 |
| -25159.50 | -6.12 | -25127.50 | -6.80 | -25096.79 | -8.78  | -25064.75 | -9.42  | -25035.97 | -13.31 | -25001.67 | -11.70 | -24989.40 | -15.77 |
| -25159.67 | -6.29 | -25129.12 | -8.42 | -25096.81 | -8.79  | -25065.78 | -10.44 | -25036.02 | -13.37 | -25002.60 | -12.63 | -24987.42 | -13.79 |
| -25159.44 | -6.06 | -25129.09 | -8.39 | -25098.82 | -10.81 | -25064.12 | -8.79  | -25033.62 | -10.97 | -25003.38 | -13.41 | -24990.61 | -16.98 |
| -25161.23 | -7.85 | -25126.91 | -6.21 | -25098.31 | -10.29 | -25068.34 | -13.01 | -25035.58 | -12.93 | -25002.51 | -12.54 | -24991.17 | -17.55 |
| -25160.17 | -6.79 | -25128.15 | -7.45 | -25096.81 | -8.80  | -25066.58 | -11.25 | -25036.08 | -13.43 | -25004.65 | -14.68 | -24989.65 | -16.02 |
| -25159.98 | -6.60 | -25128.91 | -8.21 | -25096.30 | -8.28  | -25066.10 | -10.77 | -25033.92 | -11.27 | -25006.58 | -16.61 | -24990.04 | -16.42 |
| -25160.11 | -6.73 | -25127.68 | -6.98 | -25099.31 | -11.30 | -25063.96 | -8.63  | -25034.86 | -12.20 | -25006.05 | -16.08 | -24990.98 | -17.35 |
| -25159.30 | -5.92 | -25128.16 | -7.46 | -25096.66 | -8.65  | -25067.36 | -12.03 | -25036.82 | -14.16 | -25006.72 | -16.75 | -24990.22 | -16.59 |
| -25159.79 | -6.41 | -25129.55 | -8.85 | -25096.89 | -8.88  | -25065.30 | -9.97  | -25036.18 | -13.53 | -25005.11 | -15.14 | -24989.17 | -15.54 |
| -25159.66 | -6.28 | -25127.94 | -7.25 | -25097.34 | -9.33  | -25063.24 | -7.90  | -25035.05 | -12.40 | -25002.57 | -12.60 | -24991.23 | -17.60 |
| -25159.66 | -6.28 | -25128.29 | -7.59 | -25096.87 | -8.86  | -25065.13 | -9.79  | -25034.63 | -11.98 | -25008.25 | -18.28 | -24984.77 | -11.14 |
| -25159.29 | -5.91 | -25128.18 | -7.49 | -25098.44 | -10.42 | -25066.13 | -10.80 | -25035.09 | -12.44 | -25001.51 | -11.54 | -24990.65 | -17.02 |
| -25159.50 | -6.12 | -25128.08 | -7.38 | -25098.32 | -10.31 | -25062.02 | -6.69  | -25035.05 | -12.40 | -25004.92 | -14.95 | -24988.01 | -14.38 |
| -25158.26 | -4.88 | -25127.01 | -6.31 | -25097.08 | -9.06  | -25066.22 | -10.89 | -25032.87 | -10.22 | -25005.85 | -15.88 | -24989.04 | -15.42 |
| -25160.18 | -6.80 | -25129.06 | -8.36 | -25096.58 | -8.56  | -25067.56 | -12.22 | -25034.34 | -11.68 | -25003.22 | -13.25 | -24987.49 | -13.87 |
| -25159.32 | -5.94 | -25129.33 | -8.63 | -25095.96 | -7.94  | -25068.86 | -13.52 | -25034.45 | -11.80 | -25005.23 | -15.26 | -24991.92 | -18.29 |
| -25159.75 | -6.37 | -25128.83 | -8.13 | -25096.60 | -8.59  | -25063.49 | -8.16  | -25035.91 | -13.26 | -25005.25 | -15.28 | -24989.19 | -15.56 |
| -25161.11 | -7.73 | -25125.72 | -5.02 | -25098.88 | -10.86 | -25068.56 | -13.23 | -25035.62 | -12.97 | -25002.88 | -12.91 | -24988.40 | -14.77 |
| -25160.10 | -6.72 | -25128.11 | -7.41 | -25096.66 | -8.65  | -25064.88 | -9.54  | -25033.44 | -10.79 | -25007.55 | -17.58 | -24987.24 | -13.61 |
| -25160.05 | -6.67 | -25127.06 | -6.36 | -25093.71 | -5.70  | -25067.34 | -12.00 | -25037.42 | -14.77 | -25006.00 | -16.03 | -24985.56 | -11.94 |
| -25160.07 | -6.69 | -25127.38 | -6.68 | -25099.22 | -11.21 | -25062.61 | -7.28  | -25030.16 | -7.51  | -25005.37 | -15.40 | -24988.53 | -14.90 |
| -25158.33 | -4.95 | -25126.62 | -5.92 | -25095.72 | -7.70  | -25063.76 | -8.42  | -25034.08 | -11.43 | -25006.13 | -16.16 | -24989.94 | -16.31 |
| -25160.78 | -7.40 | -25128.25 | -7.56 | -25096.38 | -8.36  | -25065.84 | -10.51 | -25034.83 | -12.18 | -25000.78 | -10.81 | -24987.68 | -14.06 |
| -25159.09 | -5.71 | -25127.24 | -6.54 | -25094.31 | -6.29  | -25068.30 | -12.97 | -25034.24 | -11.59 | -25003.12 | -13.15 | -24982.34 | -8.71  |
| -25158.59 | -5.21 | -25127.32 | -6.62 | -25093.64 | -5.62  | -25068.14 | -12.81 | -25036.89 | -14.24 | -25003.19 | -13.22 | -24988.41 | -14.78 |
| -25160.44 | -7.06 | -25126.26 | -5.56 | -25097.15 | -9.14  | -25065.27 | -9.94  | -25035.12 | -12.47 | -25003.24 | -13.27 | -24992.44 | -18.81 |
| -25158.32 | -4.94 | -25127.53 | -6.83 | -25095.18 | -7.16  | -25065.58 | -10.24 | -25036.75 | -14.10 | -25005.92 | -15.95 | -24987.27 | -13.64 |
| -25160.01 | -6.63 | -25127.27 | -6.57 | -25095.36 | -7.35  | -25067.20 | -11.86 | -25035.68 | -13.03 | -25005.33 | -15.36 | -24990.07 | -16.44 |
| -25161.42 | -8.04 | -25128.42 | -7.72 | -25097.92 | -9.90  | -25064.41 | -9.08  | -25036.98 | -14.33 | -25005.63 | -15.66 | -24984.57 | -10.94 |
| -25160.30 | -6.92 | -25128.96 | -8.26 | -25095.59 | -7.57  | -25061.88 | -6.55  | -25031.82 | -9.17  | -25001.48 | -11.51 | -24990.34 | -16.71 |
| -25159.73 | -6.35 | -25128.63 | -7.93 | -25094.59 | -6.57  | -25066.66 | -11.33 | -25032.23 | -9.58  | -24998.82 | -8.85  | -24986.98 | -13.35 |

|           |       |           |       |           |        |           |        |           |        |           |        |           |        |
|-----------|-------|-----------|-------|-----------|--------|-----------|--------|-----------|--------|-----------|--------|-----------|--------|
| -25159.36 | -5.98 | -25127.18 | -6.48 | -25097.28 | -9.27  | -25066.44 | -11.11 | -25035.85 | -13.20 | -24994.49 | -4.52  | -24989.31 | -15.68 |
| -25159.06 | -5.68 | -25127.80 | -7.10 | -25095.89 | -7.88  | -25064.75 | -9.42  | -25036.17 | -13.51 | -25005.86 | -15.89 | -24984.24 | -10.62 |
| -25159.47 | -6.09 | -25127.17 | -6.47 | -25098.11 | -10.09 | -25066.96 | -11.62 | -25033.33 | -10.68 | -25006.06 | -16.09 | -24989.69 | -16.06 |
| -25160.65 | -7.27 | -25128.38 | -7.68 | -25094.74 | -6.72  | -25065.99 | -10.65 | -25029.83 | -7.18  | -24997.68 | -7.71  | -24987.94 | -14.31 |
| -25159.07 | -5.69 | -25125.73 | -5.03 | -25097.96 | -9.95  | -25067.01 | -11.68 | -25036.13 | -13.48 | -25006.01 | -16.05 | -24989.18 | -15.56 |
| -25159.76 | -6.38 | -25127.52 | -6.82 | -25097.35 | -9.33  | -25064.98 | -9.64  | -25034.52 | -11.87 | -25005.31 | -15.34 | -24991.63 | -18.00 |
| -25159.68 | -6.30 | -25127.06 | -6.36 | -25097.45 | -9.44  | -25064.78 | -9.44  | -25036.62 | -13.97 | -25002.15 | -12.18 | -24987.76 | -14.13 |
| -25159.79 | -6.41 | -25129.02 | -8.33 | -25094.54 | -6.53  | -25065.03 | -9.70  | -25033.05 | -10.40 | -25005.44 | -15.47 | -24990.35 | -16.73 |
| -25160.26 | -6.88 | -25127.68 | -6.99 | -25098.12 | -10.11 | -25063.85 | -8.52  | -25033.10 | -10.45 | -25001.99 | -12.02 | -24990.58 | -16.95 |
| -25161.40 | -8.02 | -25127.24 | -6.55 | -25097.68 | -9.66  | -25066.05 | -10.71 | -25035.86 | -13.21 | -25001.52 | -11.55 | -24988.81 | -15.18 |
| -25159.45 | -6.07 | -25128.35 | -7.65 | -25097.81 | -9.80  | -25066.04 | -10.71 | -25033.95 | -11.30 | -25002.92 | -12.95 | -24991.38 | -17.75 |
| -25160.26 | -6.88 | -25125.67 | -4.97 | -25092.37 | -4.36  | -25062.40 | -7.06  | -25032.92 | -10.27 | -25008.53 | -18.56 | -24986.95 | -13.32 |
| -25158.24 | -4.86 | -25128.73 | -8.03 | -25096.74 | -8.73  | -25065.05 | -9.71  | -25031.31 | -8.66  | -25004.81 | -14.84 | -24981.69 | -8.06  |
| -25159.22 | -5.84 | -25129.09 | -8.39 | -25097.33 | -9.31  | -25064.76 | -9.42  | -25037.88 | -15.23 | -25004.89 | -14.92 | -24989.03 | -15.40 |
| -25157.99 | -4.61 | -25128.39 | -7.70 | -25094.24 | -6.22  | -25066.60 | -11.27 | -25033.56 | -10.90 | -25000.06 | -10.09 | -24986.61 | -12.98 |
| -25159.26 | -5.88 | -25129.04 | -8.34 | -25095.94 | -7.93  | -25065.83 | -10.50 | -25033.14 | -10.49 | -25004.58 | -14.61 | -24987.71 | -14.08 |
| -25159.64 | -6.26 | -25128.00 | -7.30 | -25095.59 | -7.57  | -25066.41 | -11.07 | -25035.33 | -12.68 | -25006.06 | -16.09 | -24989.65 | -16.02 |
| -25159.74 | -6.37 | -25127.87 | -7.17 | -25096.29 | -8.28  | -25065.91 | -10.58 | -25035.70 | -13.05 | -25005.23 | -15.26 | -24987.52 | -13.90 |
| -25160.03 | -6.65 | -25129.06 | -8.36 | -25096.09 | -8.07  | -25064.30 | -8.97  | -25034.07 | -11.42 | -25003.91 | -13.94 | -24988.36 | -14.73 |
| -25159.79 | -6.41 | -25129.57 | -8.87 | -25097.73 | -9.72  | -25062.83 | -7.50  | -25032.81 | -10.16 | -24998.73 | -8.77  | -24989.84 | -16.21 |
| -25159.19 | -5.81 | -25128.99 | -8.29 | -25095.67 | -7.66  | -25058.18 | -2.84  | -25034.15 | -11.50 | -25002.20 | -12.23 | -24987.04 | -13.41 |
| -25160.57 | -7.19 | -25128.06 | -7.36 | -25097.60 | -9.58  | -25064.99 | -9.66  | -25034.70 | -12.05 | -25004.48 | -14.51 | -24983.08 | -9.45  |
| -25158.69 | -5.31 | -25125.57 | -4.87 | -25095.88 | -7.87  | -25066.21 | -10.88 | -25037.69 | -15.04 | -25000.68 | -10.71 | -24987.56 | -13.94 |
| -25159.51 | -6.13 | -25126.91 | -6.22 | -25097.10 | -9.08  | -25067.88 | -12.55 | -25032.28 | -9.63  | -25004.05 | -14.08 | -24985.89 | -12.26 |
| -25159.36 | -5.99 | -25128.11 | -7.41 | -25097.42 | -9.41  | -25067.16 | -11.82 | -25037.08 | -14.43 | -25001.20 | -11.23 | -24987.92 | -14.29 |
| -25160.07 | -6.69 | -25127.47 | -6.77 | -25097.43 | -9.42  | -25065.20 | -9.87  | -25036.49 | -13.84 | -25004.87 | -14.90 | -24990.06 | -16.43 |
| -25159.28 | -5.90 | -25126.90 | -6.21 | -25096.75 | -8.74  | -25067.12 | -11.79 | -25035.54 | -12.89 | -25006.39 | -16.42 | -24990.42 | -16.79 |
| -25158.32 | -4.94 | -25129.44 | -8.75 | -25095.80 | -7.79  | -25066.84 | -11.50 | -25035.10 | -12.44 | -25006.56 | -16.59 | -24987.17 | -13.54 |
| -25160.22 | -6.84 | -25128.34 | -7.64 | -25096.38 | -8.36  | -25063.68 | -8.35  | -25035.17 | -12.52 | -25003.38 | -13.41 | -24987.55 | -13.92 |
| -25158.38 | -5.00 | -25127.97 | -7.28 | -25097.69 | -9.67  | -25064.70 | -9.37  | -25035.96 | -13.31 | -25007.23 | -17.27 | -24990.09 | -16.46 |
| -25158.25 | -4.87 | -25128.03 | -7.33 | -25097.09 | -9.08  | -25065.93 | -10.60 | -25033.62 | -10.97 | -25003.85 | -13.88 | -24988.46 | -14.83 |
| -25159.12 | -5.74 | -25127.30 | -6.60 | -25092.44 | -4.42  | -25065.00 | -9.67  | -25036.81 | -14.16 | -25007.52 | -17.55 | -24989.48 | -15.85 |
| -25159.89 | -6.51 | -25128.12 | -7.42 | -25096.54 | -8.53  | -25068.36 | -13.03 | -25033.86 | -11.21 | -24998.91 | -8.94  | -24986.21 | -12.58 |
| -25159.77 | -6.39 | -25128.99 | -8.29 | -25097.35 | -9.33  | -25066.41 | -11.08 | -25034.88 | -12.23 | -25006.58 | -16.61 | -24986.87 | -13.25 |
| -25159.34 | -5.96 | -25126.68 | -5.98 | -25092.56 | -4.54  | -25067.08 | -11.74 | -25034.74 | -12.09 | -25006.05 | -16.08 | -24983.79 | -10.16 |
| -25160.38 | -7.00 | -25128.28 | -7.59 | -25096.16 | -8.15  | -25063.92 | -8.59  | -25036.64 | -13.99 | -25004.93 | -14.96 | -24990.92 | -17.29 |
| -25160.69 | -7.31 | -25128.92 | -8.22 | -25097.36 | -9.34  | -25063.00 | -7.67  | -25035.11 | -12.46 | -25005.92 | -15.95 | -24990.71 | -17.08 |
| -25159.35 | -5.97 | -25127.94 | -7.24 | -25098.65 | -10.63 | -25066.43 | -11.10 | -25033.86 | -11.20 | -25004.91 | -14.94 | -24988.19 | -14.56 |
| -25160.07 | -6.69 | -25126.06 | -5.36 | -25098.19 | -10.17 | -25065.49 | -10.16 | -25033.07 | -10.42 | -25005.11 | -15.14 | -24987.12 | -13.49 |
| -25160.54 | -7.16 | -25127.62 | -6.92 | -25096.16 | -8.14  | -25066.19 | -10.85 | -25035.75 | -13.10 | -25006.28 | -16.31 | -24988.15 | -14.52 |
| -25161.02 | -7.64 | -25127.42 | -6.72 | -25097.38 | -9.36  | -25062.57 | -7.23  | -25034.70 | -12.05 | -25004.48 | -14.51 | -24989.50 | -15.87 |

|           |       |           |       |           |        |           |        |           |           |           |        |           |        |
|-----------|-------|-----------|-------|-----------|--------|-----------|--------|-----------|-----------|-----------|--------|-----------|--------|
| -25159.85 | -6.47 | -25127.16 | -6.46 | -25097.74 | -9.72  | -25065.84 | -10.50 | -25036.15 | -13.50    | -25005.14 | -15.17 | -24987.11 | -13.48 |
| -25159.76 | -6.38 | -25128.45 | -7.75 | -25096.48 | -8.47  | -25065.42 | -10.09 | -25034.35 | -11.69    | -25004.26 | -14.29 | -24989.13 | -15.50 |
| -25159.71 | -6.33 | -25128.73 | -8.03 | -25097.49 | -9.47  | -25064.76 | -9.43  | -25033.77 | -11.12    | -25005.83 | -15.86 | -24989.90 | -16.27 |
| -25158.70 | -5.32 | -25127.58 | -6.88 | -25099.08 | -11.07 | -25065.89 | -10.55 | -25035.70 | -13.05    | -25003.59 | -13.62 |           |        |
| -25160.23 | -6.85 | -25125.78 | -5.08 | -25096.36 | -8.34  | -25064.06 | -8.73  | -25034.40 | -11.75    | -25003.34 | -13.37 |           |        |
| -25160.42 | -7.04 | -25126.62 | -5.92 | -25097.75 | -9.73  | -25066.84 | -11.51 |           | -24996.64 | -6.67     |        |           |        |
| -25159.24 | -5.86 | -25128.07 | -7.37 | -25093.90 | -5.89  | -25065.28 | -9.95  |           |           |           |        |           |        |
| -25157.65 | -4.27 | -25128.04 | -7.34 | -25092.80 | -4.79  | -25066.59 | -11.25 |           |           |           |        |           |        |
| -25160.12 | -6.74 |           |       |           |        |           |        |           |           |           |        |           |        |

Average energies

|           |       |           |       |           |        |           |        |           |        |           |        |           |        |
|-----------|-------|-----------|-------|-----------|--------|-----------|--------|-----------|--------|-----------|--------|-----------|--------|
| -25161.42 | -8.04 | -25130.30 | -9.60 | -25099.31 | -11.30 | -25068.86 | -13.52 | -25037.95 | -15.30 | -25008.53 | -18.56 | -24993.72 | -20.09 |
|-----------|-------|-----------|-------|-----------|--------|-----------|--------|-----------|--------|-----------|--------|-----------|--------|

ground state energy  
solid solution energy

**Pu**

concentration in solid solution (%)  
number of atoms

|           | 3     | 6         | 9     | 12        | 15     | 18        | 21     |           |        |           |        |           |        |
|-----------|-------|-----------|-------|-----------|--------|-----------|--------|-----------|--------|-----------|--------|-----------|--------|
|           | 2     | 4         | 6     | 8         | 10     | 12        | 13     |           |        |           |        |           |        |
| -25154.68 | -7.28 | -25116.62 | -7.89 | -25076.05 | -5.99  | -25041.58 | -10.19 | -25005.95 | -13.23 | -24970.61 | -16.55 | -24944.90 | -10.18 |
| -25153.68 | -6.28 | -25116.83 | -8.11 | -25080.58 | -10.52 | -25042.83 | -11.44 | -25006.10 | -13.38 | -24968.87 | -14.82 | -24951.49 | -16.76 |
| -25154.42 | -7.03 | -25116.83 | -8.10 | -25078.46 | -8.40  | -25042.63 | -11.24 | -25004.05 | -11.32 | -24967.31 | -13.25 | -24949.18 | -14.45 |
| -25155.14 | -7.74 | -25114.66 | -5.94 | -25079.64 | -9.59  | -25043.67 | -12.28 | -25006.60 | -13.88 | -24967.58 | -13.52 | -24950.67 | -15.94 |
| -25153.10 | -5.70 | -25115.22 | -6.50 | -25076.92 | -6.86  | -25041.86 | -10.47 | -25007.10 | -14.38 | -24969.65 | -15.60 | -24949.71 | -14.99 |
| -25154.19 | -6.80 | -25116.18 | -7.45 | -25077.70 | -7.64  | -25040.77 | -9.38  | -25004.15 | -11.43 | -24968.75 | -14.70 | -24951.85 | -17.12 |
| -25152.57 | -5.18 | -25114.97 | -6.25 | -25076.57 | -6.51  | -25040.58 | -9.19  | -25005.31 | -12.58 | -24969.98 | -15.93 | -24950.47 | -15.75 |
| -25152.80 | -5.41 | -25114.99 | -6.26 | -25080.48 | -10.42 | -25041.98 | -10.58 | -25006.37 | -13.64 | -24967.44 | -13.38 | -24951.23 | -16.51 |
| -25154.31 | -6.92 | -25117.72 | -8.99 | -25079.10 | -9.04  | -25041.98 | -10.59 | -25005.52 | -12.80 | -24967.67 | -13.62 | -24951.85 | -17.13 |
| -25153.77 | -6.38 | -25116.22 | -7.50 | -25076.79 | -6.73  | -25040.25 | -8.86  | -25006.37 | -13.65 | -24970.22 | -16.16 | -24949.94 | -15.22 |
| -25153.72 | -6.33 | -25115.27 | -6.55 | -25079.57 | -9.51  | -25042.77 | -11.38 | -25005.89 | -13.17 | -24969.56 | -15.50 | -24950.51 | -15.79 |
| -25154.44 | -7.04 | -25115.51 | -6.78 | -25079.39 | -9.33  | -25042.70 | -11.30 | -25004.74 | -12.02 | -24966.68 | -12.63 | -24951.01 | -16.29 |
| -25154.84 | -7.45 | -25116.24 | -7.52 | -25080.31 | -10.25 | -25044.43 | -13.04 | -25007.39 | -14.66 | -24970.25 | -16.20 | -24952.61 | -17.89 |
| -25153.48 | -6.08 | -25115.67 | -6.94 | -25079.70 | -9.64  | -25039.48 | -8.09  | -25005.99 | -13.27 | -24967.37 | -13.32 | -24951.18 | -16.45 |
| -25154.70 | -7.30 | -25117.39 | -8.66 | -25079.80 | -9.74  | -25041.79 | -10.40 | -25003.85 | -11.13 | -24968.90 | -14.84 | -24950.51 | -15.79 |
| -25154.59 | -7.19 | -25114.78 | -6.06 | -25077.57 | -7.51  | -25040.22 | -8.82  | -25006.31 | -13.59 | -24968.06 | -14.00 | -24950.67 | -15.95 |
| -25153.00 | -5.60 | -25117.57 | -8.85 | -25080.12 | -10.06 | -25043.88 | -12.49 | -25004.35 | -11.62 | -24967.56 | -13.51 | -24948.35 | -13.62 |
| -25154.52 | -7.12 | -25116.46 | -7.73 | -25077.63 | -7.57  | -25041.11 | -9.72  | -25005.46 | -12.74 | -24969.22 | -15.17 | -24950.07 | -15.35 |
| -25153.14 | -5.75 | -25114.79 | -6.06 | -25078.49 | -8.43  | -25044.24 | -12.84 | -25002.01 | -9.29  | -24965.68 | -11.63 | -24951.10 | -16.37 |
| -25153.89 | -6.49 | -25116.21 | -7.48 | -25080.21 | -10.15 | -25042.38 | -10.98 | -25004.75 | -12.03 | -24970.85 | -16.80 | -24949.08 | -14.35 |
| -25154.20 | -6.81 | -25116.42 | -7.69 | -25079.57 | -9.52  | -25042.47 | -11.08 | -25006.81 | -14.08 | -24970.28 | -16.23 | -24952.28 | -17.55 |
| -25153.86 | -6.47 | -25117.38 | -8.65 | -25079.94 | -9.88  | -25041.60 | -10.20 | -25006.54 | -13.81 | -24968.55 | -14.50 | -24950.90 | -16.18 |
| -25153.93 | -6.53 | -25115.51 | -6.79 | -25076.81 | -6.75  | -25042.63 | -11.23 | -25006.53 | -13.81 | -24969.71 | -15.65 | -24950.64 | -15.91 |



|           |       |           |       |           |        |           |        |           |        |           |        |           |        |
|-----------|-------|-----------|-------|-----------|--------|-----------|--------|-----------|--------|-----------|--------|-----------|--------|
| -25152.98 | -5.58 | -25116.45 | -7.72 | -25076.55 | -6.49  | -25043.85 | -12.46 | -25005.74 | -13.02 | -24966.35 | -12.30 | -24950.69 | -15.97 |
| -25153.59 | -6.20 | -25115.04 | -6.31 | -25075.30 | -5.24  | -25042.10 | -10.71 | -25004.67 | -11.94 | -24969.53 | -15.47 | -24946.56 | -11.84 |
| -25154.29 | -6.89 | -25115.81 | -7.08 | -25079.88 | -9.82  | -25040.19 | -8.80  | -25006.23 | -13.51 | -24966.58 | -12.53 | -24949.63 | -14.91 |
| -25154.56 | -7.17 | -25116.06 | -7.34 | -25078.83 | -8.77  | -25043.74 | -12.34 | -25006.62 | -13.90 | -24969.50 | -15.45 | -24951.51 | -16.78 |
| -25153.67 | -6.27 | -25116.12 | -7.40 | -25075.50 | -5.44  | -25041.17 | -9.78  | -25002.82 | -10.10 | -24969.77 | -15.72 | -24951.81 | -17.09 |
| -25153.42 | -6.03 | -25114.01 | -5.28 | -25078.71 | -8.65  | -25043.71 | -12.31 | -25003.47 | -10.75 | -24967.32 | -13.27 | -24950.78 | -16.06 |
| -25153.07 | -5.68 | -25117.08 | -8.35 | -25079.42 | -9.36  | -25038.92 | -7.53  | -25007.77 | -15.05 | -24969.99 | -15.94 | -24952.03 | -17.30 |
| -25153.40 | -6.01 | -25115.86 | -7.13 | -25078.71 | -8.65  | -25042.65 | -11.25 | -25006.42 | -13.70 | -24971.07 | -17.01 | -24951.27 | -16.55 |
| -25153.97 | -6.57 | -25114.80 | -6.07 | -25078.77 | -8.71  | -25041.98 | -10.59 | -25004.72 | -12.00 | -24965.35 | -11.29 | -24950.04 | -15.32 |
| -25152.92 | -5.53 | -25116.93 | -8.21 | -25077.39 | -7.33  | -25043.22 | -11.83 | -25005.04 | -12.32 | -24968.37 | -14.32 | -24952.48 | -17.76 |
| -25153.56 | -6.17 | -25116.58 | -7.85 | -25081.85 | -11.79 | -25044.19 | -12.80 | -25004.78 | -12.05 | -24969.34 | -15.28 | -24949.45 | -14.73 |
| -25154.39 | -6.99 | -25116.29 | -7.57 | -25080.12 | -10.06 | -25041.40 | -10.01 | -25006.62 | -13.89 | -24970.34 | -16.28 | -24948.50 | -13.78 |
| -25151.48 | -4.08 | -25116.40 | -7.68 | -25080.57 | -10.51 | -25043.81 | -12.42 | -25004.29 | -11.57 | -24970.38 | -16.33 | -24948.60 | -13.88 |
| -25153.66 | -6.26 | -25117.70 | -8.97 | -25078.96 | -8.90  | -25042.34 | -10.95 | -25004.67 | -11.94 | -24965.96 | -11.90 | -24950.75 | -16.03 |
| -25153.09 | -5.70 | -25116.02 | -7.29 | -25079.96 | -9.90  | -25042.32 | -10.93 | -25004.75 | -12.02 | -24969.58 | -15.52 | -24949.79 | -15.07 |
| -25154.89 | -7.49 | -25115.56 | -6.83 | -25079.67 | -9.61  | -25043.31 | -11.92 | -25005.30 | -12.58 | -24966.94 | -12.88 | -24952.15 | -17.43 |
| -25154.37 | -6.97 | -25116.02 | -7.30 | -25079.49 | -9.44  | -25041.02 | -9.63  | -25005.98 | -13.26 | -24969.05 | -15.00 | -24949.42 | -14.70 |
| -25152.09 | -4.70 | -25116.67 | -7.95 | -25079.00 | -8.94  | -25038.40 | -7.01  | -25005.35 | -12.63 | -24967.63 | -13.58 | -24951.26 | -16.54 |
| -25154.67 | -7.28 | -25115.99 | -7.27 | -25079.42 | -9.36  | -25040.17 | -8.78  | -25005.56 | -12.84 | -24966.99 | -12.93 | -24948.98 | -14.25 |
| -25154.69 | -7.29 | -25115.47 | -6.75 | -25077.99 | -7.93  | -25041.03 | -9.63  | -25003.79 | -11.06 | -24970.75 | -16.69 | -24951.44 | -16.72 |
| -25153.28 | -5.89 | -25116.70 | -7.98 | -25080.42 | -10.36 | -25041.17 | -9.78  | -25005.93 | -13.21 | -24968.93 | -14.87 | -24948.92 | -14.19 |
| -25153.98 | -6.58 | -25116.21 | -7.48 | -25077.48 | -7.42  | -25040.99 | -9.60  | -25006.95 | -14.23 | -24968.42 | -14.37 | -24950.03 | -15.31 |
| -25154.07 | -6.68 | -25116.76 | -8.03 | -25079.46 | -9.40  | -25041.97 | -10.57 | -25002.92 | -10.19 | -24970.86 | -16.80 | -24950.06 | -15.34 |
| -25152.96 | -5.57 | -25117.75 | -9.02 | -25078.40 | -8.34  | -25042.22 | -10.83 | -25006.14 | -13.41 | -24968.59 | -14.53 | -24950.98 | -16.26 |
| -25151.94 | -4.54 | -25117.81 | -9.08 | -25078.10 | -8.04  | -25043.30 | -11.90 | -25005.57 | -12.84 | -24970.75 | -16.70 | -24945.59 | -10.87 |
| -25153.40 | -6.00 | -25116.01 | -7.28 | -25078.84 | -8.78  | -25041.04 | -9.64  | -25005.47 | -12.75 | -24965.07 | -11.01 | -24952.28 | -17.56 |
| -25153.66 | -6.27 | -25116.69 | -7.96 | -25080.39 | -10.33 | -25041.40 | -10.01 | -25002.95 | -10.22 | -24970.44 | -16.38 | -24951.10 | -16.38 |
| -25153.85 | -6.45 | -25116.03 | -7.30 | -25078.35 | -8.29  | -25043.09 | -11.70 | -25006.28 | -13.56 | -24969.29 | -15.23 | -24952.16 | -17.44 |
| -25153.36 | -5.97 | -25116.12 | -7.39 | -25079.03 | -8.97  | -25040.96 | -9.57  | -25007.11 | -14.39 | -24968.58 | -14.53 | -24951.50 | -16.78 |
| -25154.08 | -6.68 | -25114.92 | -6.19 | -25079.07 | -9.01  | -25041.70 | -10.31 | -25005.54 | -12.82 | -24969.77 | -15.72 | -24948.47 | -13.74 |
| -25152.67 | -5.27 | -25115.86 | -7.13 | -25079.72 | -9.66  | -25041.84 | -10.45 | -25005.87 | -13.15 | -24967.85 | -13.80 | -24951.02 | -16.30 |
| -25153.53 | -6.14 | -25116.40 | -7.68 | -25078.38 | -8.32  | -25042.58 | -11.19 | -25005.79 | -13.07 | -24971.32 | -17.26 | -24953.12 | -18.40 |
| -25153.39 | -5.99 | -25116.00 | -7.27 | -25080.32 | -10.26 | -25043.24 | -11.84 | -25005.76 | -13.04 | -24968.98 | -14.93 | -24948.32 | -13.59 |
| -25154.25 | -6.86 | -25115.56 | -6.83 | -25079.06 | -9.01  | -25037.84 | -6.45  | -25005.76 | -13.03 | -24966.86 | -12.81 | -24950.27 | -15.55 |
| -25154.22 | -6.82 | -25116.74 | -8.01 | -25079.71 | -9.65  | -25042.35 | -10.96 | -25004.65 | -11.93 | -24968.24 | -14.18 | -24949.72 | -15.00 |
| -25153.69 | -6.29 | -25115.63 | -6.90 | -25080.03 | -9.98  | -25042.10 | -10.71 | -25005.73 | -13.00 | -24966.19 | -12.14 | -24951.33 | -16.61 |
| -25155.24 | -7.84 | -25116.05 | -7.32 | -25079.94 | -9.88  | -25041.47 | -10.08 | -25006.14 | -13.41 | -24968.23 | -14.17 | -24950.96 | -16.24 |
| -25154.15 | -6.75 | -25115.18 | -6.46 | -25080.26 | -10.20 | -25042.30 | -10.91 | -25007.95 | -15.22 | -24967.11 | -13.05 | -24950.07 | -15.35 |
| -25153.63 | -6.24 | -25114.44 | -5.72 | -25080.64 | -10.58 | -25039.65 | -8.26  | -25006.76 | -14.04 | -24969.13 | -15.08 | -24952.26 | -17.54 |
| -25154.03 | -6.64 | -25114.58 | -5.85 | -25079.87 | -9.81  | -25040.33 | -8.94  | -25003.16 | -10.43 | -24970.54 | -16.48 | -24952.09 | -17.36 |
| -25153.63 | -6.23 | -25114.43 | -5.71 | -25078.68 | -8.62  | -25044.24 | -12.85 | -25004.40 | -11.68 | -24967.81 | -13.76 | -24952.05 | -17.33 |

|           |       |           |       |           |        |           |        |           |        |           |        |           |        |
|-----------|-------|-----------|-------|-----------|--------|-----------|--------|-----------|--------|-----------|--------|-----------|--------|
| -25154.53 | -7.13 | -25115.61 | -6.88 | -25080.34 | -10.28 | -25041.92 | -10.53 | -25002.87 | -10.15 | -24968.41 | -14.35 | -24947.86 | -13.14 |
| -25154.65 | -7.26 | -25118.21 | -9.49 | -25075.98 | -5.93  | -25041.95 | -10.56 | -25004.67 | -11.94 | -24969.28 | -15.22 | -24952.63 | -17.91 |
| -25152.79 | -5.40 | -25116.19 | -7.46 | -25078.30 | -8.25  | -25042.86 | -11.47 | -25006.42 | -13.69 | -24968.52 | -14.46 | -24951.75 | -17.03 |
| -25154.55 | -7.15 | -25114.78 | -6.05 | -25079.37 | -9.31  | -25042.64 | -11.25 | -25001.11 | -8.39  | -24966.82 | -12.77 | -24950.46 | -15.74 |
| -25152.20 | -4.81 | -25116.23 | -7.51 | -25078.87 | -8.81  | -25041.93 | -10.54 | -25003.91 | -11.19 | -24970.48 | -16.42 | -24952.93 | -18.21 |
| -25154.52 | -7.13 | -25115.69 | -6.96 | -25079.77 | -9.71  | -25041.16 | -9.77  | -25006.42 | -13.70 | -24968.02 | -13.96 | -24952.81 | -18.09 |
| -25152.07 | -4.67 | -25117.47 | -8.74 | -25079.87 | -9.81  | -25042.08 | -10.69 | -25006.69 | -13.97 | -24970.24 | -16.18 | -24948.69 | -13.96 |
| -25153.04 | -5.65 | -25116.98 | -8.25 | -25079.51 | -9.45  | -25041.64 | -10.24 | -25005.42 | -12.70 | -24968.34 | -14.29 | -24949.28 | -14.56 |
| -25153.20 | -5.81 | -25117.18 | -8.46 | -25079.19 | -9.13  | -25043.06 | -11.67 | -25007.68 | -14.95 | -24967.06 | -13.00 | -24950.65 | -15.92 |
| -25153.19 | -5.79 | -25116.04 | -7.31 | -25079.46 | -9.40  | -25042.76 | -11.37 | -25004.49 | -11.77 | -24969.66 | -15.60 | -24952.48 | -17.76 |
| -25153.88 | -6.49 | -25114.73 | -6.01 | -25080.61 | -10.55 | -25039.73 | -8.34  | -25005.43 | -12.70 | -24969.65 | -15.60 | -24950.56 | -15.84 |
| -25153.21 | -5.81 | -25116.71 | -7.98 | -25077.76 | -7.71  | -25042.06 | -10.67 | -25003.96 | -11.24 | -24970.42 | -16.36 | -24950.34 | -15.62 |
| -25153.94 | -6.55 | -25113.08 | -4.36 | -25078.77 | -8.71  | -25041.73 | -10.34 | -25006.12 | -13.40 | -24967.23 | -13.18 | -24952.64 | -17.92 |
| -25153.18 | -5.79 | -25116.39 | -7.67 | -25078.92 | -8.86  | -25040.84 | -9.45  | -25005.53 | -12.80 | -24968.07 | -14.02 | -24950.85 | -16.13 |
| -25153.30 | -5.90 | -25116.55 | -7.82 | -25079.97 | -9.91  | -25040.36 | -8.97  | -25005.77 | -13.04 | -24965.57 | -11.52 | -24951.34 | -16.62 |
| -25152.77 | -5.38 | -25116.97 | -8.25 | -25081.00 | -10.94 | -25044.18 | -12.79 | -25005.34 | -12.62 | -24969.68 | -15.63 | -24951.31 | -16.59 |
| -25155.08 | -7.68 | -25115.77 | -7.04 | -25075.83 | -5.77  | -25041.19 | -9.80  | -25007.75 | -15.03 | -24969.72 | -15.67 | -24949.45 | -14.72 |
| -25153.83 | -6.43 | -25117.06 | -8.33 | -25078.49 | -8.43  | -25041.87 | -10.47 | -25007.45 | -14.73 | -24969.19 | -15.13 | -24949.67 | -14.95 |
| -25154.29 | -6.90 | -25116.84 | -8.11 | -25078.43 | -8.37  | -25042.54 | -11.15 | -25007.10 | -14.37 | -24969.13 | -15.07 | -24950.83 | -16.11 |
| -25152.92 | -5.52 | -25115.10 | -6.38 | -25080.58 | -10.52 | -25041.11 | -9.71  | -25005.38 | -12.66 | -24968.84 | -14.78 | -24949.08 | -14.36 |
| -25153.55 | -6.15 | -25115.33 | -6.60 | -25079.96 | -9.90  | -25042.46 | -11.07 | -25005.30 | -12.57 | -24967.79 | -13.73 | -24952.01 | -17.28 |
| -25154.71 | -7.32 | -25117.04 | -8.31 | -25078.97 | -8.92  | -25039.95 | -8.56  | -25006.21 | -13.48 | -24969.98 | -15.93 | -24950.24 | -15.52 |
| -25152.53 | -5.13 | -25114.76 | -6.04 | -25081.05 | -10.99 | -25042.67 | -11.27 | -25006.32 | -13.60 | -24967.19 | -13.13 | -24951.62 | -16.90 |
| -25153.63 | -6.24 | -25117.22 | -8.50 | -25078.70 | -8.64  | -25040.97 | -9.58  | -25005.88 | -13.16 | -24968.39 | -14.33 | -24947.51 | -12.78 |
| -25153.94 | -6.55 | -25116.76 | -8.03 | -25079.29 | -9.23  | -25041.82 | -10.43 | -25004.84 | -12.11 | -24968.67 | -14.62 | -24948.87 | -14.15 |
| -25155.27 | -7.88 | -25115.55 | -6.82 | -25079.52 | -9.46  | -25041.85 | -10.46 | -25006.00 | -13.28 | -24968.56 | -14.50 | -24950.98 | -16.26 |
| -25154.51 | -7.11 | -25116.06 | -7.33 | -25078.78 | -8.72  | -25042.09 | -10.70 | -25005.54 | -12.81 | -24967.76 | -13.71 | -24949.99 | -15.27 |
| -25153.13 | -5.74 | -25115.76 | -7.03 | -25079.08 | -9.02  | -25042.08 | -10.69 | -25003.98 | -11.25 | -24968.83 | -14.77 | -24948.62 | -13.90 |
| -25155.16 | -7.76 | -25115.18 | -6.46 | -25077.85 | -7.79  | -25043.05 | -11.66 | -25003.59 | -10.87 | -24970.47 | -16.42 | -24952.20 | -17.48 |
| -25154.13 | -6.74 | -25116.15 | -7.42 | -25078.99 | -8.93  | -25043.47 | -12.08 | -25006.43 | -13.70 | -24969.85 | -15.79 | -24952.07 | -17.35 |
| -25153.06 | -5.66 | -25117.18 | -8.46 | -25080.37 | -10.31 | -25041.51 | -10.12 | -24994.22 | -1.50  | -24969.11 | -15.06 | -24947.47 | -12.75 |
| -25153.29 | -5.90 | -25116.97 | -8.24 | -25078.15 | -8.09  | -25038.75 | -7.36  | -25005.24 | -12.52 | -24969.63 | -15.58 | -24950.05 | -15.33 |
| -25152.67 | -5.27 | -25113.37 | -4.65 | -25079.75 | -9.69  | -25043.29 | -11.90 | -25006.84 | -14.11 | -24970.38 | -16.32 | -24948.00 | -13.28 |
| -25152.87 | -5.47 | -25116.34 | -7.61 | -25078.90 | -8.84  | -25042.43 | -11.04 | -25007.31 | -14.58 | -24971.80 | -17.74 | -24950.22 | -15.49 |
| -25152.57 | -5.17 | -25117.52 | -8.79 | -25079.20 | -9.14  | -25041.96 | -10.57 | -25004.47 | -11.75 | -24969.03 | -14.97 | -24951.43 | -16.71 |
| -25154.28 | -6.89 | -25116.01 | -7.28 | -25081.29 | -11.23 | -25040.07 | -8.68  | -25002.16 | -9.44  | -24969.66 | -15.60 | -24947.30 | -12.58 |
| -25153.87 | -6.48 | -25114.72 | -6.00 | -25077.47 | -7.41  | -25039.81 | -8.42  | -25003.65 | -10.92 | -24968.56 | -14.50 | -24950.53 | -15.81 |
| -25153.66 | -6.26 | -25115.03 | -6.30 | -25079.58 | -9.52  | -25043.57 | -12.17 | -25005.01 | -12.29 | -24968.06 | -14.01 | -24951.76 | -17.04 |
| -25152.89 | -5.50 | -25115.23 | -6.50 | -25079.55 | -9.49  | -25040.72 | -9.33  | -25006.15 | -13.42 | -24968.03 | -13.97 | -24950.38 | -15.65 |
| -25155.43 | -8.04 | -25115.12 | -6.39 | -25081.05 | -10.99 | -25040.79 | -9.40  | -25005.02 | -12.30 | -24969.93 | -15.87 | -24950.53 | -15.81 |
| -25153.91 | -6.51 | -25114.93 | -6.21 | -25078.46 | -8.40  | -25042.33 | -10.94 | -25003.42 | -10.70 | -24967.92 | -13.87 | -24948.75 | -14.02 |

|           |       |           |       |           |        |           |        |           |        |           |        |           |        |
|-----------|-------|-----------|-------|-----------|--------|-----------|--------|-----------|--------|-----------|--------|-----------|--------|
| -25154.27 | -6.88 | -25114.86 | -6.14 | -25079.39 | -9.33  | -25043.99 | -12.59 | -25003.78 | -11.06 | -24968.88 | -14.83 | -24951.11 | -16.39 |
| -25153.39 | -5.99 | -25116.96 | -8.24 | -25078.53 | -8.47  | -25043.64 | -12.25 | -25001.79 | -9.07  | -24970.72 | -16.66 | -24952.52 | -17.79 |
| -25153.31 | -5.92 | -25116.10 | -7.38 | -25079.23 | -9.17  | -25044.05 | -12.66 | -25005.12 | -12.40 | -24970.76 | -16.70 | -24949.05 | -14.33 |
| -25153.26 | -5.87 | -25117.00 | -8.27 | -25080.61 | -10.55 | -25044.57 | -13.18 | -25005.33 | -12.61 | -24971.16 | -17.10 | -24952.37 | -17.65 |
| -25154.44 | -7.05 | -25116.87 | -8.15 | -25080.55 | -10.50 | -25042.22 | -10.83 | -25004.17 | -11.44 | -24970.16 | -16.11 | -24951.22 | -16.50 |
| -25153.86 | -6.46 | -25114.90 | -6.17 | -25079.51 | -9.46  | -25041.38 | -9.99  | -25005.35 | -12.62 | -24969.72 | -15.66 | -24950.00 | -15.28 |
| -25153.09 | -5.70 | -25116.93 | -8.20 | -25080.99 | -10.93 | -25043.77 | -12.38 | -25004.14 | -11.41 | -24969.89 | -15.83 | -24951.25 | -16.52 |
| -25154.05 | -6.65 | -25116.10 | -7.37 | -25079.65 | -9.59  | -25040.28 | -8.89  | -25005.65 | -12.92 | -24968.83 | -14.77 | -24948.38 | -13.66 |
| -25153.02 | -5.62 | -25114.74 | -6.01 | -25081.34 | -11.28 | -25042.30 | -10.91 | -25004.35 | -11.63 | -24967.62 | -13.56 | -24952.44 | -17.72 |
| -25154.18 | -6.78 | -25114.72 | -5.99 | -25078.36 | -8.30  | -25041.79 | -10.40 | -25005.36 | -12.64 | -24966.79 | -12.74 | -24950.16 | -15.43 |
| -25154.65 | -7.26 | -25116.47 | -7.74 | -25078.86 | -8.80  | -25043.27 | -11.88 | -25005.66 | -12.94 | -24968.77 | -14.72 | -24950.87 | -16.15 |
| -25153.29 | -5.89 | -25114.14 | -5.42 | -25078.70 | -8.64  | -25037.89 | -6.50  | -25005.04 | -12.32 |           |        | -24952.38 | -17.65 |
| -25153.02 | -5.62 | -25116.37 | -7.65 |           |        | -25040.96 | -9.57  |           |        |           |        | -24950.13 | -15.40 |
| -25153.26 | -5.86 | -25116.44 | -7.71 |           |        | -25042.94 | -11.55 |           |        |           |        |           |        |
| -25154.42 | -7.02 |           |       |           |        |           |        |           |        |           |        |           |        |

Average energies      -25153.72      -6.33      -25116.01      -7.28      -25079.11      -9.06      -25041.93      -10.54      -25005.23      -12.51      -24968.81      -14.75      -24950.49      -15.77

ground      solid  
state      solution  
energy      energy

## Th

concentration in solid solution (%)

number of atoms

|           | 3     | 6         | 9     | 12        | 15     | 18        | 21     |           |        |           |        |           |        |
|-----------|-------|-----------|-------|-----------|--------|-----------|--------|-----------|--------|-----------|--------|-----------|--------|
|           | 2     | 4         | 6     | 8         | 10     | 12        | 13     |           |        |           |        |           |        |
| -25157.98 | -4.96 | -25128.64 | -8.65 | -25096.14 | -9.19  | -25064.10 | -10.19 | -25034.33 | -13.45 | -25004.58 | -16.74 | -24986.81 | -15.49 |
| -25159.15 | -6.13 | -25128.95 | -8.96 | -25095.17 | -8.22  | -25064.35 | -10.44 | -25033.22 | -12.34 | -25002.94 | -15.10 | -24985.88 | -14.56 |
| -25157.93 | -4.90 | -25126.72 | -6.73 | -25096.57 | -9.62  | -25064.51 | -10.60 | -25033.79 | -12.91 | -25002.48 | -14.64 | -24988.42 | -17.10 |
| -25159.87 | -6.84 | -25129.23 | -9.24 | -25093.73 | -6.78  | -25064.84 | -10.93 | -25032.46 | -11.58 | -25002.14 | -14.30 | -24991.11 | -19.79 |
| -25160.39 | -7.37 | -25126.93 | -6.94 | -25097.59 | -10.64 | -25063.73 | -9.82  | -25032.69 | -11.82 | -25000.31 | -12.47 | -24986.89 | -15.57 |
| -25159.83 | -6.81 | -25125.73 | -5.74 | -25096.50 | -9.55  | -25064.82 | -10.91 | -25034.54 | -13.66 | -24998.03 | -10.19 | -24984.96 | -13.64 |
| -25158.70 | -5.68 | -25125.12 | -5.13 | -25094.80 | -7.85  | -25065.03 | -11.11 | -25034.96 | -14.09 | -25004.55 | -16.72 | -24988.16 | -16.84 |
| -25158.54 | -5.51 | -25127.70 | -7.72 | -25097.18 | -10.23 | -25067.59 | -13.68 | -25035.60 | -14.72 | -25004.00 | -16.16 | -24986.68 | -15.36 |
| -25160.12 | -7.09 | -25126.69 | -6.70 | -25097.11 | -10.16 | -25066.12 | -12.20 | -25031.64 | -10.76 | -25000.77 | -12.93 | -24986.30 | -14.98 |
| -25158.42 | -5.40 | -25124.42 | -4.43 | -25097.18 | -10.23 | -25066.05 | -12.13 | -25033.29 | -12.42 | -25003.73 | -15.89 | -24988.06 | -16.74 |
| -25159.31 | -6.28 | -25128.25 | -8.26 | -25096.44 | -9.49  | -25064.24 | -10.33 | -25032.98 | -12.11 | -25005.59 | -17.76 | -24987.28 | -15.96 |
| -25157.98 | -4.95 | -25128.03 | -8.04 | -25094.39 | -7.44  | -25066.59 | -12.68 | -25035.20 | -14.32 | -25002.37 | -14.53 | -24987.40 | -16.08 |
| -25159.69 | -6.67 | -25127.78 | -7.80 | -25095.97 | -9.02  | -25065.98 | -12.06 | -25032.47 | -11.59 | -24997.31 | -9.48  | -24988.80 | -17.48 |
| -25159.61 | -6.59 | -25128.86 | -8.88 | -25095.21 | -8.26  | -25063.39 | -9.48  | -25033.84 | -12.96 | -25004.57 | -16.73 | -24988.65 | -17.33 |
| -25158.19 | -5.16 | -25126.29 | -6.30 | -25097.55 | -10.60 | -25065.96 | -12.04 | -25034.84 | -13.96 | -25000.67 | -12.83 | -24983.73 | -12.41 |
| -25157.82 | -4.80 | -25127.29 | -7.30 | -25096.87 | -9.92  | -25063.88 | -9.97  | -25033.92 | -13.04 | -24988.67 | -0.83  | -24990.88 | -19.56 |
| -25157.95 | -4.93 | -25127.30 | -7.32 | -25096.57 | -9.62  | -25065.75 | -11.83 | -25033.85 | -12.97 | -25005.96 | -18.12 | -24991.34 | -20.02 |

|           |       |           |        |           |        |           |        |           |        |           |        |           |        |
|-----------|-------|-----------|--------|-----------|--------|-----------|--------|-----------|--------|-----------|--------|-----------|--------|
| -25157.64 | -4.62 | -25127.59 | -7.60  | -25093.56 | -6.60  | -25063.64 | -9.73  | -25031.89 | -11.02 | -25004.95 | -17.11 | -24989.93 | -18.61 |
| -25159.41 | -6.39 | -25130.70 | -10.71 | -25095.57 | -8.62  | -25061.13 | -7.22  | -25032.21 | -11.34 | -25002.97 | -15.14 | -24990.30 | -18.98 |
| -25158.86 | -5.84 | -25127.22 | -7.23  | -25097.63 | -10.68 | -25064.76 | -10.85 | -25035.89 | -15.01 | -24999.95 | -12.12 | -24987.07 | -15.75 |
| -25158.37 | -5.34 | -25126.91 | -6.92  | -25098.20 | -11.25 | -25063.96 | -10.05 | -25032.64 | -11.77 | -25007.23 | -19.39 | -24987.27 | -15.95 |
| -25159.35 | -6.32 | -25129.55 | -9.56  | -25097.03 | -10.08 | -25065.80 | -11.89 | -25035.02 | -14.14 | -25002.66 | -14.82 | -24984.58 | -13.26 |
| -25159.32 | -6.30 | -25127.51 | -7.52  | -25096.47 | -9.52  | -25065.79 | -11.88 | -25034.65 | -13.77 | -25000.57 | -12.73 | -24990.98 | -19.66 |
| -25158.83 | -5.81 | -25129.24 | -9.25  | -25096.65 | -9.70  | -25062.44 | -8.53  | -25033.36 | -12.48 | -25003.41 | -15.57 | -24990.09 | -18.77 |
| -25160.74 | -7.71 | -25128.51 | -8.52  | -25097.27 | -10.32 | -25062.82 | -8.91  | -25032.10 | -11.22 | -25001.17 | -13.33 | -24986.67 | -15.35 |
| -25159.62 | -6.59 | -25127.76 | -7.77  | -25094.92 | -7.96  | -25062.55 | -8.63  | -25035.61 | -14.74 | -25003.47 | -15.63 | -24987.86 | -16.54 |
| -25160.31 | -7.29 | -25127.65 | -7.66  | -25096.22 | -9.27  | -25062.44 | -8.53  | -25036.62 | -15.75 | -25002.99 | -15.15 | -24989.11 | -17.79 |
| -25159.31 | -6.29 | -25127.56 | -7.57  | -25094.47 | -7.51  | -25067.09 | -13.18 | -25034.70 | -13.83 | -25002.86 | -15.02 | -24987.45 | -16.13 |
| -25159.67 | -6.65 | -25127.74 | -7.75  | -25096.79 | -9.84  | -25063.67 | -9.76  | -25031.04 | -10.16 | -25004.88 | -17.04 | -24985.07 | -13.75 |
| -25158.43 | -5.41 | -25128.39 | -8.41  | -25098.03 | -11.08 | -25066.67 | -12.76 | -25033.65 | -12.77 | -25006.02 | -18.18 | -24979.04 | -7.72  |
| -25160.70 | -7.67 | -25127.11 | -7.12  | -25096.64 | -9.69  | -25064.63 | -10.71 | -25035.42 | -14.54 | -25002.90 | -15.06 | -24987.07 | -15.75 |
| -25159.07 | -6.04 | -25127.12 | -7.13  | -25096.92 | -9.97  | -25061.36 | -7.44  | -25035.46 | -14.58 | -25004.07 | -16.23 | -24991.62 | -20.30 |
| -25158.62 | -5.59 | -25128.09 | -8.10  | -25095.43 | -8.48  | -25067.21 | -13.29 | -25035.85 | -14.97 | -25004.67 | -16.83 | -24991.16 | -19.84 |
| -25159.46 | -6.44 | -25128.50 | -8.51  | -25094.48 | -7.53  | -25066.19 | -12.28 | -25032.43 | -11.55 | -25002.76 | -14.92 | -24987.93 | -16.61 |
| -25158.74 | -5.71 | -25127.41 | -7.43  | -25095.88 | -8.93  | -25065.98 | -12.06 | -25035.07 | -14.20 | -24999.51 | -11.67 | -24990.06 | -18.74 |
| -25159.10 | -6.07 | -25126.01 | -6.02  | -25095.39 | -8.44  | -25065.81 | -11.89 | -25035.67 | -14.80 | -25002.19 | -14.35 | -24988.51 | -17.19 |
| -25158.98 | -5.95 | -25128.51 | -8.52  | -25098.68 | -11.73 | -25066.42 | -12.51 | -25031.09 | -10.22 | -25006.13 | -18.29 | -24987.20 | -15.88 |
| -25160.57 | -7.54 | -25125.89 | -5.90  | -25095.16 | -8.21  | -25065.21 | -11.30 | -25026.28 | -5.40  | -25001.74 | -13.90 | -24990.70 | -19.38 |
| -25157.14 | -4.11 | -25128.16 | -8.18  | -25094.04 | -7.09  | -25056.72 | -2.81  | -25034.85 | -13.97 | -25005.41 | -17.57 | -24988.60 | -17.28 |
| -25159.99 | -6.97 | -25126.36 | -6.37  | -25096.05 | -9.10  | -25061.76 | -7.85  | -25032.44 | -11.57 | -25004.65 | -16.81 | -24988.34 | -17.02 |
| -25159.46 | -6.44 | -25127.30 | -7.31  | -25095.71 | -8.76  | -25063.02 | -9.11  | -25030.10 | -9.22  | -25000.77 | -12.93 | -24989.44 | -18.12 |
| -25158.74 | -5.71 | -25126.60 | -6.61  | -25098.60 | -11.65 | -25067.10 | -13.19 | -25031.95 | -11.08 | -25004.12 | -16.29 | -24987.31 | -15.99 |
| -25159.63 | -6.60 | -25127.97 | -7.98  | -25095.13 | -8.18  | -25064.11 | -10.20 | -25034.73 | -13.85 | -25002.22 | -14.38 | -24988.70 | -17.38 |
| -25159.66 | -6.64 | -25125.78 | -5.79  | -25094.91 | -7.96  | -25064.75 | -10.83 | -25029.91 | -9.03  | -25002.98 | -15.15 | -24980.95 | -9.63  |
| -25159.06 | -6.04 | -25128.52 | -8.53  | -25096.08 | -9.13  | -25062.28 | -8.37  | -25035.52 | -14.64 | -25005.58 | -17.75 | -24991.27 | -19.95 |
| -25159.34 | -6.31 | -25128.42 | -8.43  | -25096.84 | -9.89  | -25065.59 | -11.68 | -25032.22 | -11.34 | -25002.61 | -14.77 | -24985.69 | -14.37 |
| -25159.30 | -6.28 | -25126.98 | -6.99  | -25095.95 | -9.00  | -25064.50 | -10.59 | -25035.07 | -14.20 | -25003.19 | -15.36 | -24989.88 | -18.56 |
| -25159.98 | -6.95 | -25125.76 | -5.77  | -25096.98 | -10.03 | -25063.83 | -9.92  | -25031.22 | -10.35 | -25000.67 | -12.83 | -24991.18 | -19.86 |
| -25159.42 | -6.39 | -25125.48 | -5.49  | -25095.24 | -8.29  | -25063.31 | -9.40  | -25034.86 | -13.99 | -25002.60 | -14.76 | -24991.11 | -19.79 |
| -25159.02 | -6.00 | -25126.69 | -6.70  | -25097.40 | -10.45 | -25063.28 | -9.37  | -25033.69 | -12.82 | -25005.35 | -17.51 | -24987.88 | -16.56 |
| -25160.06 | -7.03 | -25127.10 | -7.11  | -25095.94 | -8.99  | -25064.46 | -10.55 | -25035.32 | -14.44 | -25004.70 | -16.87 | -24983.02 | -11.70 |
| -25159.78 | -6.76 | -25127.20 | -7.21  | -25095.32 | -8.37  | -25065.81 | -11.90 | -25032.88 | -12.00 | -25001.75 | -13.91 | -24991.14 | -19.82 |
| -25159.48 | -6.46 | -25126.05 | -6.07  | -25097.82 | -10.87 | -25061.45 | -7.54  | -25036.82 | -15.94 | -24999.66 | -11.82 | -24988.34 | -17.02 |
| -25160.73 | -7.70 | -25129.17 | -9.18  | -25096.26 | -9.31  | -25058.42 | -4.51  | -25030.89 | -10.01 | -25003.06 | -15.22 | -24989.56 | -18.24 |
| -25159.09 | -6.06 | -25127.61 | -7.62  | -25096.05 | -9.10  | -25067.19 | -13.27 | -25035.37 | -14.49 | -25005.13 | -17.29 | -24986.63 | -15.31 |
| -25160.07 | -7.05 | -25127.96 | -7.97  | -25094.12 | -7.17  | -25063.79 | -9.87  | -25031.39 | -10.51 | -25002.20 | -14.36 | -24990.19 | -18.87 |
| -25160.72 | -7.70 | -25124.71 | -4.73  | -25095.63 | -8.68  | -25065.43 | -11.52 | -25032.09 | -11.22 | -25001.01 | -13.17 | -24984.04 | -12.72 |
| -25160.53 | -7.51 | -25126.78 | -6.79  | -25096.56 | -9.61  | -25064.09 | -10.17 | -25034.51 | -13.64 | -25006.86 | -19.02 | -24985.74 | -14.42 |

|           |       |           |       |           |        |           |        |           |        |           |        |           |        |
|-----------|-------|-----------|-------|-----------|--------|-----------|--------|-----------|--------|-----------|--------|-----------|--------|
| -25160.37 | -7.35 | -25129.59 | -9.60 | -25095.90 | -8.95  | -25062.18 | -8.27  | -25034.01 | -13.14 | -25004.36 | -16.52 | -24990.26 | -18.94 |
| -25159.59 | -6.56 | -25128.07 | -8.08 | -25095.17 | -8.22  | -25066.23 | -12.32 | -25037.68 | -16.80 | -25003.30 | -15.46 | -24988.01 | -16.69 |
| -25158.76 | -5.74 | -25128.71 | -8.72 | -25093.80 | -6.85  | -25059.85 | -5.94  | -25033.39 | -12.52 | -25002.22 | -14.38 | -24988.88 | -17.56 |
| -25159.20 | -6.18 | -25127.08 | -7.09 | -25096.79 | -9.84  | -25065.53 | -11.62 | -25032.66 | -11.79 | -25000.20 | -12.36 | -24985.79 | -14.47 |
| -25159.84 | -6.82 | -25126.23 | -6.24 | -25094.20 | -7.25  | -25064.20 | -10.29 | -25027.70 | -6.83  | -25003.93 | -16.09 | -24986.17 | -14.85 |
| -25159.45 | -6.43 | -25127.42 | -7.44 | -25094.87 | -7.92  | -25064.52 | -10.60 | -25033.74 | -12.87 | -24999.80 | -11.96 | -24989.58 | -18.26 |
| -25159.65 | -6.63 | -25129.00 | -9.01 | -25096.94 | -9.99  | -25059.26 | -5.34  | -25032.98 | -12.10 | -25005.03 | -17.19 | -24985.55 | -14.23 |
| -25159.63 | -6.60 | -25128.53 | -8.54 | -25096.46 | -9.51  | -25064.08 | -10.17 | -25029.15 | -8.27  | -25003.52 | -15.68 | -24989.47 | -18.15 |
| -25159.75 | -6.72 | -25126.09 | -6.10 | -25096.59 | -9.64  | -25062.56 | -8.65  | -25034.54 | -13.66 | -24999.92 | -12.08 | -24988.05 | -16.73 |
| -25160.35 | -7.33 | -25128.25 | -8.26 | -25096.90 | -9.95  | -25066.12 | -12.21 | -25035.24 | -14.36 | -25005.31 | -17.47 | -24989.57 | -18.25 |
| -25159.26 | -6.24 | -25128.50 | -8.52 | -25096.39 | -9.44  | -25064.68 | -10.77 | -25031.52 | -10.64 | -25000.06 | -12.22 | -24988.39 | -17.07 |
| -25158.82 | -5.80 | -25128.50 | -8.51 | -25097.58 | -10.63 | -25067.44 | -13.52 | -25034.50 | -13.62 | -25002.42 | -14.59 | -24988.76 | -17.44 |
| -25159.19 | -6.17 | -25126.83 | -6.84 | -25094.39 | -7.44  | -25065.05 | -11.14 | -25035.02 | -14.14 | -25005.24 | -17.41 | -24988.92 | -17.60 |
| -25159.63 | -6.60 | -25125.24 | -5.26 | -25096.37 | -9.42  | -25064.10 | -10.19 | -25032.60 | -11.72 | -24998.62 | -10.78 | -24987.55 | -16.23 |
| -25159.95 | -6.93 | -25127.46 | -7.47 | -25093.67 | -6.72  | -25063.10 | -9.19  | -25027.38 | -6.51  | -25001.78 | -13.94 | -24990.45 | -19.13 |
| -25159.17 | -6.15 | -25127.40 | -7.42 | -25095.85 | -8.90  | -25062.80 | -8.89  | -25032.32 | -11.44 | -24997.99 | -10.15 | -24986.25 | -14.93 |
| -25158.86 | -5.83 | -25127.46 | -7.47 | -25094.11 | -7.16  | -25064.58 | -10.66 | -25034.39 | -13.51 | -25000.82 | -12.98 | -24987.40 | -16.08 |
| -25157.57 | -4.54 | -25127.70 | -7.71 | -25092.66 | -5.71  | -25062.73 | -8.82  | -25036.02 | -15.14 | -25001.39 | -13.55 | -24983.42 | -12.10 |
| -25158.51 | -5.49 | -25128.73 | -8.74 | -25097.13 | -10.18 | -25061.98 | -8.06  | -25027.00 | -6.12  | -25003.15 | -15.31 | -24990.82 | -19.50 |
| -25159.26 | -6.23 | -25128.48 | -8.49 | -25096.45 | -9.50  | -25063.28 | -9.37  | -25033.59 | -12.72 | -25000.59 | -12.75 | -24988.76 | -17.44 |
| -25158.39 | -5.37 | -25126.80 | -6.81 | -25094.85 | -7.90  | -25063.59 | -9.68  | -25031.64 | -10.77 | -25003.42 | -15.58 | -24987.83 | -16.51 |
| -25159.79 | -6.77 | -25126.72 | -6.73 | -25098.32 | -11.37 | -25064.23 | -10.32 | -25033.96 | -13.08 | -25002.34 | -14.50 | -24988.16 | -16.84 |
| -25159.38 | -6.36 | -25127.60 | -7.61 | -25096.13 | -9.18  | -25065.58 | -11.67 | -25034.12 | -13.24 | -25005.83 | -17.99 | -24986.01 | -14.69 |
| -25158.40 | -5.37 | -25126.33 | -6.34 | -25098.46 | -11.51 | -25064.09 | -10.18 | -25033.88 | -13.00 | -25003.87 | -16.03 | -24987.43 | -16.11 |
| -25159.45 | -6.42 | -25128.25 | -8.26 | -25097.04 | -10.09 | -25062.76 | -8.85  | -25035.02 | -14.15 | -25002.04 | -14.20 | -24988.94 | -17.62 |
| -25160.25 | -7.22 | -25125.61 | -5.62 | -25097.50 | -10.55 | -25065.54 | -11.63 | -25036.42 | -15.54 | -25007.08 | -19.24 | -24989.58 | -18.26 |
| -25160.10 | -7.08 | -25125.93 | -5.94 | -25095.76 | -8.81  | -25065.62 | -11.70 | -25037.28 | -16.40 | -24999.98 | -12.15 | -24990.04 | -18.72 |
| -25158.53 | -5.51 | -25129.33 | -9.34 | -25096.85 | -9.90  | -25063.59 | -9.68  | -25029.19 | -8.32  | -25002.13 | -14.29 | -24986.39 | -15.07 |
| -25158.78 | -5.76 | -25126.30 | -6.31 | -25094.80 | -7.85  | -25064.65 | -10.74 | -25030.23 | -9.36  | -25000.01 | -12.17 | -24983.28 | -11.96 |
| -25158.82 | -5.80 | -25123.93 | -3.94 | -25096.41 | -9.46  | -25062.80 | -8.89  | -25030.00 | -9.12  | -25002.34 | -14.50 | -24987.65 | -16.33 |
| -25158.44 | -5.41 | -25129.22 | -9.23 | -25094.54 | -7.59  | -25068.13 | -14.21 | -25031.85 | -10.98 | -25005.28 | -17.45 | -24988.86 | -17.54 |
| -25158.89 | -5.86 | -25128.36 | -8.38 | -25096.13 | -9.18  | -25062.90 | -8.99  | -25034.13 | -13.26 | -25005.10 | -17.26 | -24989.31 | -17.99 |
| -25160.15 | -7.13 | -25128.66 | -8.67 | -25094.58 | -7.63  | -25066.34 | -12.42 | -25033.24 | -12.36 | -25000.40 | -12.57 | -24989.25 | -17.93 |
| -25159.49 | -6.46 | -25129.66 | -9.67 | -25096.71 | -9.76  | -25062.84 | -8.92  | -25033.95 | -13.08 | -25003.91 | -16.07 | -24991.10 | -19.78 |
| -25157.76 | -4.73 | -25127.38 | -7.39 | -25096.20 | -9.25  | -25065.68 | -11.77 | -25028.40 | -7.52  | -25004.55 | -16.71 | -24988.49 | -17.17 |
| -25159.74 | -6.71 | -25127.08 | -7.09 | -25095.15 | -8.20  | -25064.00 | -10.09 | -25036.89 | -16.02 | -25005.15 | -17.31 | -24987.88 | -16.56 |
| -25159.15 | -6.12 | -25127.68 | -7.69 | -25094.65 | -7.69  | -25067.02 | -13.11 | -25032.77 | -11.90 | -25002.30 | -14.46 | -24990.66 | -19.34 |
| -25157.58 | -4.55 | -25127.87 | -7.88 | -25097.18 | -10.23 | -25065.76 | -11.85 | -25033.72 | -12.85 | -25002.57 | -14.73 | -24986.94 | -15.62 |
| -25159.55 | -6.52 | -25126.64 | -6.66 | -25094.74 | -7.79  | -25066.12 | -12.21 | -25030.31 | -9.44  | -25004.72 | -16.88 | -24985.53 | -14.21 |
| -25158.60 | -5.58 | -25128.11 | -8.12 | -25097.43 | -10.48 | -25064.05 | -10.13 | -25035.33 | -14.46 | -25004.74 | -16.90 | -24988.21 | -16.89 |
| -25160.17 | -7.14 | -25126.43 | -6.45 | -25094.62 | -7.67  | -25062.75 | -8.84  | -25032.78 | -11.91 | -25005.29 | -17.46 | -24988.68 | -17.36 |

|           |       |           |        |           |        |           |        |           |        |           |        |           |        |
|-----------|-------|-----------|--------|-----------|--------|-----------|--------|-----------|--------|-----------|--------|-----------|--------|
| -25157.82 | -4.80 | -25125.87 | -5.88  | -25098.12 | -11.17 | -25067.51 | -13.60 | -25036.10 | -15.23 | -25000.90 | -13.06 | -24988.26 | -16.94 |
| -25158.86 | -5.83 | -25124.30 | -4.31  | -25097.60 | -10.65 | -25064.32 | -10.41 | -25030.78 | -9.91  | -25001.20 | -13.36 | -24990.32 | -19.00 |
| -25160.56 | -7.53 | -25128.42 | -8.43  | -25097.35 | -10.40 | -25063.64 | -9.73  | -25030.59 | -9.71  | -25007.84 | -20.00 | -24986.39 | -15.07 |
| -25160.76 | -7.74 | -25128.20 | -8.21  | -25096.45 | -9.50  | -25062.78 | -8.87  | -25032.45 | -11.58 | -25002.47 | -14.64 | -24986.07 | -14.75 |
| -25157.88 | -4.85 | -25126.16 | -6.17  | -25094.17 | -7.22  | -25064.30 | -10.39 | -25034.72 | -13.85 | -25000.71 | -12.88 | -24984.63 | -13.31 |
| -25160.20 | -7.17 | -25128.52 | -8.53  | -25096.72 | -9.77  | -25063.57 | -9.65  | -25034.09 | -13.21 | -24998.24 | -10.40 | -24987.42 | -16.10 |
| -25158.95 | -5.92 | -25127.72 | -7.73  | -25094.74 | -7.79  | -25064.22 | -10.31 | -25031.29 | -10.42 | -25003.04 | -15.20 | -24985.95 | -14.63 |
| -25158.62 | -5.60 | -25129.61 | -9.62  | -25093.53 | -6.58  | -25061.42 | -7.51  | -25035.12 | -14.24 | -25005.05 | -17.21 | -24990.66 | -19.34 |
| -25160.61 | -7.58 | -25127.38 | -7.39  | -25097.19 | -10.24 | -25062.47 | -8.56  | -25033.33 | -12.45 | -25005.39 | -17.55 | -24989.28 | -17.96 |
| -25158.66 | -5.64 | -25127.21 | -7.23  | -25096.60 | -9.65  | -25062.02 | -8.11  | -25032.86 | -11.99 | -25003.19 | -15.35 | -24981.62 | -10.30 |
| -25160.55 | -7.53 | -25127.08 | -7.10  | -25094.79 | -7.84  | -25064.93 | -11.02 | -25035.82 | -14.95 | -25003.50 | -15.66 | -24989.00 | -17.68 |
| -25159.28 | -6.26 | -25126.14 | -6.15  | -25098.22 | -11.27 | -25063.22 | -9.31  | -25033.19 | -12.31 | -25006.01 | -18.17 | -24988.62 | -17.30 |
| -25159.86 | -6.84 | -25128.16 | -8.18  | -25096.17 | -9.22  | -25062.84 | -8.93  | -25035.24 | -14.36 | -25002.27 | -14.43 | -24989.15 | -17.83 |
| -25159.19 | -6.16 | -25128.00 | -8.01  | -25098.58 | -11.63 | -25066.52 | -12.60 | -25033.70 | -12.83 | -25002.77 | -14.93 |           |        |
| -25158.97 | -5.95 | -25126.95 | -6.96  |           |        | -25065.63 | -11.72 | -25032.18 | -11.30 | -25004.87 | -17.03 |           |        |
| -25159.43 | -6.40 | -25127.30 | -7.31  |           |        | -25065.72 | -11.81 | -25034.42 | -13.54 |           |        |           |        |
| -25157.74 | -4.72 | -25126.06 | -6.07  |           |        | -25066.64 | -12.73 | -25034.71 | -13.83 |           |        |           |        |
| -25159.77 | -6.75 | -25130.52 | -10.53 |           |        | -25066.86 | -12.95 | -25034.10 | -13.22 |           |        |           |        |
| -25158.82 | -5.80 | -25127.08 | -7.09  |           |        |           |        | -25032.23 | -11.36 |           |        |           |        |
| -25159.62 | -6.60 |           |        |           |        |           |        |           |        |           |        |           |        |
| -25158.85 | -5.83 |           |        |           |        |           |        |           |        |           |        |           |        |

Average energies

|           |       |           |       |           |       |           |        |           |        |           |        |           |        |
|-----------|-------|-----------|-------|-----------|-------|-----------|--------|-----------|--------|-----------|--------|-----------|--------|
| -25159.26 | -6.23 | -25127.45 | -7.46 | -25096.08 | -9.13 | -25064.31 | -10.40 | -25033.34 | -12.46 | -25002.81 | -14.97 | -24987.94 | -16.62 |
|-----------|-------|-----------|-------|-----------|-------|-----------|--------|-----------|--------|-----------|--------|-----------|--------|

## U

concentration in solid solution (%)

number of atoms

|           | ground<br>state<br>energy | solid<br>solution<br>energy |       |           |        |           |        |           |        |           |        |           |        |
|-----------|---------------------------|-----------------------------|-------|-----------|--------|-----------|--------|-----------|--------|-----------|--------|-----------|--------|
|           | 3                         | 6                           |       | 9         |        | 12        |        | 15        |        | 18        |        | 21        |        |
|           | 2                         | 4                           |       | 6         |        | 8         |        | 10        |        | 12        |        | 13        |        |
| -25164.48 | -6.44                     | -25136.71                   | -6.68 | -25111.98 | -9.97  | -25085.48 | -11.49 | -25059.97 | -14.00 | -25031.03 | -13.08 | -25020.96 | -17.02 |
| -25163.17 | -5.13                     | -25137.86                   | -7.84 | -25107.76 | -5.76  | -25085.32 | -11.33 | -25058.41 | -12.44 | -25034.81 | -16.86 | -25021.00 | -17.06 |
| -25163.64 | -5.59                     | -25137.17                   | -7.15 | -25109.54 | -7.54  | -25086.46 | -12.48 | -25061.75 | -15.78 | -25033.41 | -15.46 | -25021.98 | -18.03 |
| -25163.11 | -5.07                     | -25138.69                   | -8.66 | -25111.89 | -9.89  | -25081.91 | -7.93  | -25062.86 | -16.89 | -25033.24 | -15.29 | -25021.53 | -17.59 |
| -25164.21 | -6.17                     | -25137.06                   | -7.04 | -25112.29 | -10.28 | -25086.01 | -12.02 | -25060.21 | -14.24 | -25035.59 | -17.64 | -25022.02 | -18.08 |
| -25164.71 | -6.67                     | -25137.07                   | -7.04 | -25108.96 | -6.96  | -25086.05 | -12.06 | -25059.07 | -13.10 | -25036.73 | -18.78 | -25021.25 | -17.31 |
| -25164.03 | -5.98                     | -25137.09                   | -7.06 | -25111.02 | -9.02  | -25082.93 | -8.94  | -25057.10 | -11.13 | -25033.57 | -15.62 | -25020.76 | -16.81 |
| -25162.03 | -3.99                     | -25137.79                   | -7.76 | -25108.71 | -6.70  | -25085.78 | -11.79 | -25060.10 | -14.13 | -25032.40 | -14.45 | -25020.68 | -16.73 |
| -25163.24 | -5.20                     | -25137.83                   | -7.80 | -25111.87 | -9.86  | -25087.73 | -13.74 | -25058.18 | -12.21 | -25032.52 | -14.57 | -25021.19 | -17.24 |
| -25164.34 | -6.30                     | -25136.78                   | -6.76 | -25112.48 | -10.48 | -25085.08 | -11.09 | -25058.60 | -12.63 | -25031.78 | -13.83 | -25018.98 | -15.04 |
| -25163.49 | -5.44                     | -25137.00                   | -6.97 | -25111.54 | -9.53  | -25083.36 | -9.37  | -25060.48 | -14.51 | -25034.38 | -16.43 | -25016.92 | -12.98 |

|           |       |           |       |           |        |           |        |           |        |           |        |           |        |
|-----------|-------|-----------|-------|-----------|--------|-----------|--------|-----------|--------|-----------|--------|-----------|--------|
| -25162.74 | -4.69 | -25137.70 | -7.67 | -25111.97 | -9.97  | -25082.46 | -8.47  | -25059.12 | -13.15 | -25035.95 | -18.00 | -25023.96 | -20.01 |
| -25164.03 | -5.99 | -25137.80 | -7.78 | -25111.23 | -9.23  | -25083.85 | -9.87  | -25059.35 | -13.38 | -25030.16 | -12.21 | -25021.56 | -17.62 |
| -25163.97 | -5.93 | -25135.97 | -5.95 | -25110.89 | -8.88  | -25082.97 | -8.99  | -25058.85 | -12.88 | -25033.10 | -15.15 | -25022.49 | -18.54 |
| -25164.03 | -5.98 | -25137.32 | -7.30 | -25111.54 | -9.53  | -25083.57 | -9.58  | -25058.32 | -12.35 | -25034.58 | -16.62 | -25021.02 | -17.07 |
| -25156.89 | 1.15  | -25137.70 | -7.68 | -25112.27 | -10.26 | -25085.82 | -11.83 | -25063.07 | -17.10 | -25032.88 | -14.93 | -25020.85 | -16.91 |
| -25162.97 | -4.93 | -25136.80 | -6.78 | -25107.98 | -5.97  | -25084.26 | -10.27 | -25058.59 | -12.62 | -25031.61 | -13.65 | -25023.47 | -19.53 |
| -25163.26 | -5.21 | -25138.24 | -8.22 | -25112.83 | -10.82 | -25084.26 | -10.27 | -25055.85 | -9.88  | -25031.86 | -13.91 | -25020.61 | -16.67 |
| -25162.45 | -4.40 | -25136.90 | -6.88 | -25110.56 | -8.55  | -25085.74 | -11.75 | -25054.62 | -8.65  | -25028.61 | -10.66 | -25020.95 | -17.00 |
| -25163.92 | -5.87 | -25134.86 | -4.84 | -25112.95 | -10.94 | -25085.06 | -11.07 | -25059.47 | -13.50 | -25032.51 | -14.56 | -25019.68 | -15.74 |
| -25164.50 | -6.46 | -25137.95 | -7.93 | -25112.08 | -10.07 | -25081.61 | -7.62  | -25058.68 | -12.71 | -25030.49 | -12.54 | -25015.75 | -11.81 |
| -25163.08 | -5.03 | -25136.01 | -5.99 | -25109.09 | -7.09  | -25086.07 | -12.09 | -25060.59 | -14.62 | -25037.23 | -19.28 | -25020.82 | -16.88 |
| -25163.71 | -5.67 | -25134.10 | -4.07 | -25110.46 | -8.45  | -25083.90 | -9.91  | -25062.87 | -16.90 | -25030.63 | -12.68 | -25026.00 | -22.05 |
| -25163.83 | -5.79 | -25137.57 | -7.54 | -25112.30 | -10.29 | -25085.88 | -11.89 | -25054.05 | -8.08  | -25032.35 | -14.39 | -25022.17 | -18.23 |
| -25162.62 | -4.57 | -25138.23 | -8.21 | -25112.71 | -10.70 | -25084.42 | -10.44 | -25056.79 | -10.82 | -25031.17 | -13.22 | -25021.05 | -17.11 |
| -25165.00 | -6.95 | -25137.94 | -7.91 | -25112.36 | -10.35 | -25084.07 | -10.08 | -25061.43 | -15.46 | -25035.38 | -17.43 | -25019.74 | -15.80 |
| -25162.50 | -4.46 | -25137.13 | -7.10 | -25110.47 | -8.46  | -25085.65 | -11.66 | -25055.54 | -9.57  | -25032.66 | -14.71 | -25017.42 | -13.48 |
| -25163.51 | -5.46 | -25136.14 | -6.12 | -25109.44 | -7.44  | -25082.29 | -8.31  | -25056.71 | -10.74 | -25034.49 | -16.54 | -25016.26 | -12.32 |
| -25163.39 | -5.34 | -25137.72 | -7.70 | -25108.59 | -6.58  | -25084.54 | -10.55 | -25061.30 | -15.33 | -25036.84 | -18.89 | -25023.72 | -19.78 |
| -25158.15 | -0.11 | -25136.96 | -6.94 | -25110.50 | -8.50  | -25086.90 | -12.91 | -25061.46 | -15.49 | -25034.97 | -17.02 | -25023.85 | -19.91 |
| -25164.00 | -5.96 | -25139.05 | -9.03 | -25112.16 | -10.15 | -25086.58 | -12.59 | -25059.41 | -13.44 | -25033.94 | -15.98 | -25022.54 | -18.60 |
| -25162.72 | -4.68 | -25138.42 | -8.40 | -25110.44 | -8.43  | -25085.73 | -11.75 | -25059.16 | -13.19 | -25037.04 | -19.09 | -25019.55 | -15.60 |
| -25163.84 | -5.80 | -25133.97 | -3.94 | -25111.28 | -9.28  | -25083.93 | -9.94  | -25059.32 | -13.35 | -25033.47 | -15.52 | -25024.06 | -20.11 |
| -25163.36 | -5.31 | -25137.91 | -7.89 | -25110.23 | -8.23  | -25082.12 | -8.13  | -25060.46 | -14.49 | -25030.87 | -12.92 | -25023.39 | -19.44 |
| -25163.43 | -5.39 | -25136.39 | -6.37 | -25111.57 | -9.56  | -25085.07 | -11.08 | -25062.11 | -16.14 | -25035.11 | -17.16 | -25021.92 | -17.98 |
| -25163.24 | -5.19 | -25136.68 | -6.65 | -25112.57 | -10.56 | -25087.35 | -13.36 | -25059.17 | -13.20 | -25034.59 | -16.64 | -25024.16 | -20.22 |
| -25162.75 | -4.71 | -25135.30 | -5.28 | -25112.97 | -10.96 | -25085.77 | -11.78 | -25061.70 | -15.73 | -25033.65 | -15.70 | -25022.84 | -18.90 |
| -25162.68 | -4.64 | -25130.78 | -0.75 | -25111.50 | -9.50  | -25083.29 | -9.30  | -25061.51 | -15.54 | -25035.34 | -17.38 | -25021.44 | -17.50 |
| -25163.96 | -5.91 | -25137.44 | -7.42 | -25111.46 | -9.45  | -25086.13 | -12.14 | -25060.19 | -14.22 | -25033.96 | -16.01 | -25022.96 | -19.02 |
| -25163.18 | -5.13 | -25137.07 | -7.04 | -25108.41 | -6.40  | -25084.29 | -10.30 | -25057.62 | -11.65 | -25034.59 | -16.64 | -25020.39 | -16.44 |
| -25164.36 | -6.32 | -25136.94 | -6.92 | -25112.27 | -10.26 | -25083.16 | -9.17  | -25060.20 | -14.23 | -25031.23 | -13.28 | -25021.81 | -17.87 |
| -25164.23 | -6.19 | -25136.88 | -6.86 | -25111.06 | -9.06  | -25083.71 | -9.73  | -25061.55 | -15.58 | -25033.38 | -15.43 | -25023.37 | -19.42 |
| -25163.50 | -5.45 | -25135.71 | -5.69 | -25111.90 | -9.89  | -25083.12 | -9.13  | -25059.86 | -13.89 | -25032.76 | -14.81 | -25022.68 | -18.74 |
| -25163.08 | -5.04 | -25137.52 | -7.49 | -25108.05 | -6.04  | -25081.65 | -7.67  | -25058.82 | -12.85 | -25031.17 | -13.22 | -25022.98 | -19.04 |
| -25164.44 | -6.40 | -25137.76 | -7.74 | -25110.59 | -8.59  | -25086.83 | -12.84 | -25059.85 | -13.88 | -25033.50 | -15.55 | -25021.21 | -17.27 |
| -25156.92 | 1.12  | -25130.01 | 0.01  | -25111.49 | -9.49  | -25086.52 | -12.53 | -25057.61 | -11.64 | -25033.42 | -15.46 | -25015.19 | -11.25 |
| -25163.63 | -5.59 | -25137.49 | -7.47 | -25112.42 | -10.41 | -25084.40 | -10.41 | -25060.05 | -14.08 | -25029.36 | -11.41 | -25020.79 | -16.85 |
| -25163.30 | -5.25 | -25136.59 | -6.56 | -25110.65 | -8.64  | -25085.30 | -11.31 | -25058.63 | -12.66 | -25033.02 | -15.07 | -25020.08 | -16.14 |
| -25163.70 | -5.66 | -25136.67 | -6.65 | -25112.97 | -10.96 | -25086.22 | -12.23 | -25058.02 | -12.05 | -25031.71 | -13.76 | -25020.83 | -16.89 |
| -25163.96 | -5.92 | -25138.26 | -8.23 | -25113.71 | -11.71 | -25082.67 | -8.68  | -25061.83 | -15.86 | -25030.81 | -12.86 |           |        |
| -25163.02 | -4.98 | -25138.69 | -8.67 | -25110.51 | -8.50  | -25083.87 | -9.88  | -25059.37 | -13.40 | -25031.45 | -13.50 | -25023.15 | -19.21 |
| -25164.25 | -6.20 | -25136.96 | -6.94 | -25112.90 | -10.89 | -25072.82 | 1.17   | -25059.39 | -13.42 | -25035.09 | -17.14 | -25020.37 | -16.42 |

|           |       |           |       |           |        |           |        |           |        |           |        |           |        |
|-----------|-------|-----------|-------|-----------|--------|-----------|--------|-----------|--------|-----------|--------|-----------|--------|
| -25163.05 | -5.01 | -25136.09 | -6.07 | -25112.20 | -10.19 | -25084.35 | -10.36 | -25060.44 | -14.47 | -25031.62 | -13.67 | -25021.66 | -17.72 |
| -25164.02 | -5.98 | -25139.21 | -9.18 | -25111.84 | -9.83  | -25083.58 | -9.59  | -25062.21 | -16.24 | -25032.22 | -14.27 | -25021.89 | -17.95 |
| -25162.99 | -4.95 | -25135.07 | -5.04 | -25110.19 | -8.18  | -25085.78 | -11.80 | -25063.39 | -17.42 | -25032.69 | -14.74 | -25018.09 | -14.14 |
| -25162.90 | -4.86 | -25139.01 | -8.99 | -25110.29 | -8.29  | -25085.10 | -11.11 | -25063.25 | -17.28 | -25028.79 | -10.84 | -25018.82 | -14.88 |
| -25163.73 | -5.69 | -25135.13 | -5.10 | -25112.66 | -10.65 | -25088.05 | -14.06 | -25056.28 | -10.31 | -25027.74 | -9.79  | -25024.06 | -20.12 |
| -25164.69 | -6.65 | -25138.87 | -8.84 | -25112.63 | -10.63 | -25082.46 | -8.47  | -25061.21 | -15.24 | -25029.69 | -11.74 | -25018.19 | -14.25 |
| -25162.82 | -4.78 | -25138.15 | -8.12 | -25112.51 | -10.50 | -25086.88 | -12.89 | -25058.20 | -12.23 | -25034.49 | -16.54 | -25023.22 | -19.27 |
| -25161.43 | -3.38 | -25138.08 | -8.06 | -25112.86 | -10.86 | -25084.32 | -10.34 | -25059.38 | -13.41 | -25037.26 | -19.31 | -25021.58 | -17.64 |
| -25163.60 | -5.55 | -25138.26 | -8.24 | -25111.44 | -9.44  | -25080.32 | -6.34  | -25057.76 | -11.79 | -25031.19 | -13.24 | -25019.11 | -15.16 |
| -25163.44 | -5.40 | -25134.89 | -4.87 | -25111.27 | -9.27  | -25084.73 | -10.74 | -25059.88 | -13.91 | -25035.38 | -17.43 | -25017.49 | -13.54 |
| -25163.25 | -5.21 | -25137.77 | -7.75 | -25111.21 | -9.20  | -25085.95 | -11.96 | -25060.02 | -14.05 | -25031.75 | -13.80 | -25018.95 | -15.01 |
| -25163.34 | -5.30 | -25138.73 | -8.71 | -25110.31 | -8.31  | -25083.31 | -9.32  | -25053.39 | -7.42  | -25037.16 | -19.21 | -25025.19 | -21.25 |
| -25162.90 | -4.86 | -25138.16 | -8.14 | -25112.14 | -10.13 | -25084.76 | -10.77 | -25055.28 | -9.31  | -25033.47 | -15.52 | -25023.29 | -19.35 |
| -25161.93 | -3.89 | -25138.06 | -8.03 | -25112.50 | -10.49 | -25083.88 | -9.89  | -25060.27 | -14.30 | -25035.66 | -17.71 | -25021.36 | -17.41 |
| -25162.72 | -4.68 | -25136.64 | -6.62 | -25112.58 | -10.58 | -25087.23 | -13.24 | -25058.40 | -12.43 | -25029.37 | -11.42 | -25023.18 | -19.24 |
| -25161.71 | -3.67 | -25135.68 | -5.66 | -25109.16 | -7.15  | -25081.99 | -8.01  | -25061.62 | -15.65 | -25034.82 | -16.87 | -25020.25 | -16.31 |
| -25165.63 | -7.59 | -25137.12 | -7.10 | -25110.44 | -8.43  | -25084.21 | -10.23 | -25055.41 | -9.45  | -25032.70 | -14.75 | -25023.67 | -19.73 |
| -25164.45 | -6.41 | -25135.13 | -5.10 | -25110.46 | -8.46  | -25084.50 | -10.51 | -25059.78 | -13.81 | -25033.25 | -15.30 | -25021.43 | -17.49 |
| -25164.39 | -6.35 | -25136.31 | -6.28 | -25111.35 | -9.35  | -25086.36 | -12.37 | -25055.56 | -9.59  | -25034.02 | -16.07 | -25022.11 | -18.16 |
| -25163.64 | -5.59 | -25135.33 | -5.30 | -25112.32 | -10.31 | -25083.52 | -9.53  | -25061.66 | -15.69 | -25034.19 | -16.24 | -25023.12 | -19.18 |
| -25164.28 | -6.24 | -25136.87 | -6.85 | -25110.45 | -8.44  | -25086.55 | -12.57 | -25061.83 | -15.87 | -25036.17 | -18.22 | -25021.61 | -17.67 |
| -25164.34 | -6.30 | -25137.82 | -7.79 | -25112.67 | -10.66 | -25086.27 | -12.28 | -25059.12 | -13.15 | -25035.62 | -17.67 | -25017.96 | -14.02 |
| -25163.74 | -5.70 | -25135.50 | -5.48 | -25110.18 | -8.18  | -25084.86 | -10.87 | -25057.44 | -11.48 | -25033.98 | -16.03 | -25018.87 | -14.93 |
| -25163.80 | -5.75 | -25138.22 | -8.20 | -25111.30 | -9.29  | -25085.34 | -11.35 | -25062.46 | -16.49 | -25033.36 | -15.41 | -25020.58 | -16.63 |
| -25164.03 | -5.98 | -25138.28 | -8.25 | -25110.70 | -8.69  | -25081.96 | -7.97  | -25059.09 | -13.12 | -25030.56 | -12.61 | -25020.28 | -16.33 |
| -25163.12 | -5.08 | -25137.21 | -7.18 | -25108.77 | -6.76  | -25084.27 | -10.29 | -25057.40 | -11.43 | -25029.44 | -11.49 | -25024.43 | -20.48 |
| -25164.61 | -6.56 | -25138.08 | -8.06 | -25110.58 | -8.57  | -25083.83 | -9.84  | -25061.10 | -15.13 | -25035.97 | -18.02 | -25019.31 | -15.37 |
| -25163.74 | -5.70 | -25136.35 | -6.33 | -25111.40 | -9.39  | -25086.04 | -12.05 | -25058.73 | -12.76 | -25032.29 | -14.34 | -25018.17 | -14.23 |
| -25163.07 | -5.02 | -25137.20 | -7.17 | -25108.73 | -6.72  | -25085.14 | -11.15 | -25058.87 | -12.90 | -25034.31 | -16.36 | -25021.96 | -18.02 |
| -25163.64 | -5.60 | -25137.31 | -7.29 | -25111.61 | -9.60  | -25085.76 | -11.77 | -25060.93 | -14.96 | -25035.51 | -17.56 | -25014.99 | -11.05 |
| -25163.96 | -5.92 | -25137.75 | -7.73 | -25112.26 | -10.26 | -25083.86 | -9.87  | -25059.00 | -13.03 | -25032.60 | -14.65 | -25020.12 | -16.18 |
| -25163.69 | -5.65 | -25138.34 | -8.32 |           |        | -25083.79 | -9.80  | -25057.42 | -11.45 | -25030.50 | -12.55 | -25025.37 | -21.43 |
| -25163.82 | -5.78 | -25137.87 | -7.84 |           |        | -25083.84 | -9.85  | -25061.60 | -15.63 | -25031.30 | -13.35 | -25019.33 | -15.39 |
| -25162.32 | -4.28 | -25137.37 | -7.34 |           |        | -25086.34 | -12.36 |           |        | -25035.53 | -17.58 | -25020.83 | -16.89 |
| -25163.90 | -5.85 | -25138.17 | -8.15 |           |        | -25083.52 | -9.53  |           |        |           |        | -25022.14 | -18.20 |
| -25163.66 | -5.61 | -25137.05 | -7.03 |           |        | -25082.46 | -8.47  |           |        |           |        | -25021.42 | -17.48 |
| -25163.97 | -5.93 | -25136.52 | -6.50 |           |        | -25086.11 | -12.12 |           |        |           |        |           |        |
| -25164.20 | -6.15 | -25137.02 | -6.99 |           |        | -25082.97 | -8.98  |           |        |           |        |           |        |
| -25162.96 | -4.91 | -25136.82 | -6.79 |           |        | -25084.15 | -10.16 |           |        |           |        |           |        |
| -25164.17 | -6.12 | -25138.71 | -8.68 |           |        | -25083.29 | -9.30  |           |        |           |        |           |        |
|           |       | -25137.29 | -7.26 |           |        | -25082.41 | -8.42  |           |        |           |        |           |        |



|           |       |           |        |
|-----------|-------|-----------|--------|
| -25137.58 | -7.55 | -25085.10 | -11.11 |
| -25135.55 | -5.52 | -25078.76 | -4.77  |
| -25133.00 | -2.98 | -25085.24 | -11.25 |
| -25134.84 | -4.81 | -25084.22 | -10.23 |
| -25137.67 | -7.64 | -25083.01 | -9.02  |
|           |       | -25085.89 | -11.90 |

Average energies      -25163.35      -5.31   -25136.97      -6.94   -25111.19      -9.18   -25084.41      -10.42   -25059.38      -13.41   -25033.15      -15.20   -25021.13      -17.19

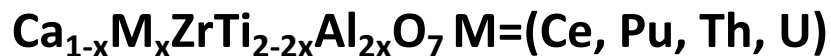

Ti(3)Ti(3)

N.B. All stated energies are in eV

| Ce                                  | ground | solid     |      |           |       |           |       |           |       |           |       |           |       |
|-------------------------------------|--------|-----------|------|-----------|-------|-----------|-------|-----------|-------|-----------|-------|-----------|-------|
|                                     | state  | solution  |      |           |       |           |       |           |       |           |       |           |       |
|                                     | energy | energy    |      |           |       |           |       |           |       |           |       |           |       |
| concentration in solid solution (%) | 3      | 6         | 9    |           | 12    |           | 15    |           | 18    |           | 21    |           |       |
| number of atoms                     | 2      | 4         | 6    |           | 8     |           | 10    |           | 12    |           | 14    |           |       |
| -25153.25                           | 0.13   | -25116.58 | 4.12 | -25079.93 | 8.09  | -25043.01 | 12.32 | -25004.67 | 17.98 | -24968.06 | 21.91 | -24931.86 | 25.43 |
| -25155.56                           | -2.18  | -25117.40 | 3.30 | -25080.11 | 7.91  | -25042.80 | 12.53 | -25005.34 | 17.31 | -24968.94 | 21.03 | -24933.61 | 23.68 |
| -25153.71                           | -0.33  | -25116.32 | 4.38 | -25078.98 | 9.04  | -25043.69 | 11.64 | -25006.70 | 15.95 | -24966.79 | 23.18 | -24928.88 | 28.41 |
| -25151.89                           | 1.49   | -25115.88 | 4.81 | -25080.42 | 7.59  | -25040.67 | 14.67 | -25005.59 | 17.06 | -24969.55 | 20.42 | -24934.63 | 22.66 |
| -25152.73                           | 0.65   | -25116.26 | 4.44 | -25081.42 | 6.59  | -25043.01 | 12.32 | -25004.31 | 18.34 | -24967.82 | 22.15 | -24933.11 | 24.17 |
| -25153.50                           | -0.12  | -25116.18 | 4.51 | -25079.35 | 8.66  | -25043.11 | 12.22 | -25007.26 | 15.39 | -24970.54 | 19.43 | -24933.92 | 23.36 |
| -25153.67                           | -0.29  | -25116.27 | 4.42 | -25079.47 | 8.54  | -25044.51 | 10.83 | -25006.70 | 15.95 | -24967.16 | 22.81 | -24933.12 | 24.17 |
| -25152.31                           | 1.07   | -25116.70 | 4.00 | -25078.40 | 9.61  | -25044.28 | 11.06 | -25000.78 | 21.87 | -24967.50 | 22.47 | -24933.76 | 23.53 |
| -25154.29                           | -0.91  | -25118.05 | 2.64 | -25079.69 | 8.33  | -25040.68 | 14.66 | -25003.86 | 18.79 | -24968.84 | 21.13 | -24934.06 | 23.22 |
| -25153.83                           | -0.45  | -25114.52 | 6.18 | -25073.11 | 14.90 | -25041.70 | 13.63 | -25006.11 | 16.54 | -24969.01 | 20.96 | -24932.46 | 24.83 |
| -25155.07                           | -1.69  | -25117.83 | 2.87 | -25079.47 | 8.55  | -25043.85 | 11.48 | -25003.09 | 19.56 | -24971.08 | 18.89 | -24930.96 | 26.33 |
| -25153.92                           | -0.54  | -25117.23 | 3.46 | -25078.49 | 9.53  | -25044.45 | 10.88 | -25006.69 | 15.97 | -24962.35 | 27.62 | -24933.99 | 23.30 |
| -25154.18                           | -0.80  | -25117.67 | 3.03 | -25080.94 | 7.07  | -25043.63 | 11.70 | -25006.31 | 16.34 | -24966.65 | 23.31 | -24934.83 | 22.45 |
| -25153.42                           | -0.04  | -25115.96 | 4.74 | -25076.66 | 11.35 | -25044.86 | 10.47 | -25004.30 | 18.35 | -24968.24 | 21.73 | -24932.17 | 25.12 |
| -25151.68                           | 1.70   | -25115.63 | 5.07 | -25078.58 | 9.44  | -25040.70 | 14.63 | -25005.60 | 17.06 | -24970.90 | 19.07 | -24933.53 | 23.76 |
| -25152.55                           | 0.83   | -25115.93 | 4.76 | -25079.83 | 8.19  | -25041.87 | 13.47 | -25005.49 | 17.16 | -24969.64 | 20.33 | -24932.51 | 24.77 |
| -25153.26                           | 0.12   | -25116.95 | 3.75 | -25079.82 | 8.20  | -25043.78 | 11.55 | -25005.85 | 16.80 | -24969.80 | 20.17 | -24932.48 | 24.81 |
| -25154.11                           | -0.73  | -25112.12 | 8.58 | -25080.23 | 7.78  | -25045.48 | 9.86  | -25007.65 | 15.00 | -24967.80 | 22.17 | -24933.68 | 23.60 |
| -25153.50                           | -0.12  | -25116.92 | 3.78 | -25076.08 | 11.93 | -25039.48 | 15.85 | -25006.28 | 16.38 | -24970.83 | 19.14 | -24929.06 | 28.23 |
| -25154.27                           | -0.89  | -25117.58 | 3.12 | -25078.43 | 9.59  | -25037.77 | 17.56 | -24998.86 | 23.79 | -24969.90 | 20.07 | -24934.84 | 22.45 |
| -25153.09                           | 0.29   | -25116.29 | 4.40 | -25080.46 | 7.55  | -25041.56 | 13.77 | -25005.03 | 17.62 | -24968.78 | 21.19 | -24931.36 | 25.93 |
| -25154.38                           | -1.01  | -25117.21 | 3.48 | -25081.44 | 6.58  | -25043.74 | 11.59 | -25003.44 | 19.21 | -24967.56 | 22.41 | -24925.29 | 31.99 |
| -25151.52                           | 1.86   | -25116.84 | 3.86 | -25079.29 | 8.73  | -25044.27 | 11.07 | -25006.99 | 15.66 | -24968.29 | 21.68 | -24930.81 | 26.47 |
| -25154.24                           | -0.86  | -25115.14 | 5.56 | -25076.82 | 11.19 | -25043.04 | 12.29 | -25004.49 | 18.17 | -24967.45 | 22.52 | -24931.72 | 25.56 |
| -25151.70                           | 1.68   | -25117.56 | 3.14 | -25077.87 | 10.14 | -25043.32 | 12.01 | -25007.22 | 15.43 | -24966.58 | 23.39 | -24934.44 | 22.85 |
| -25153.27                           | 0.11   | -25117.03 | 3.67 | -25080.04 | 7.97  | -25042.95 | 12.38 | -25004.36 | 18.29 | -24969.75 | 20.22 | -24934.38 | 22.91 |
| -25153.39                           | -0.01  | -25115.19 | 5.51 | -25078.33 | 9.69  | -25041.39 | 13.94 | -25007.14 | 15.51 | -24969.57 | 20.40 | -24934.11 | 23.17 |
| -25153.66                           | -0.28  | -25116.12 | 4.58 | -25079.59 | 8.42  | -25041.67 | 13.66 | -25006.84 | 15.81 | -24963.07 | 26.90 | -24933.58 | 23.71 |
| -25154.45                           | -1.07  | -25117.73 | 2.97 | -25078.29 | 9.73  | -25043.03 | 12.31 | -25008.46 | 14.19 | -24967.89 | 22.08 | -24935.15 | 22.13 |

|           |       |           |      |           |       |           |       |           |       |           |       |           |       |
|-----------|-------|-----------|------|-----------|-------|-----------|-------|-----------|-------|-----------|-------|-----------|-------|
| -25152.24 | 1.14  | -25115.95 | 4.75 | -25081.14 | 6.87  | -25042.51 | 12.83 | -25006.12 | 16.53 | -24968.58 | 21.39 | -24935.29 | 22.00 |
| -25154.38 | -1.00 | -25117.34 | 3.35 | -25080.28 | 7.74  | -25044.57 | 10.76 | -25005.96 | 16.70 | -24968.21 | 21.76 | -24928.01 | 29.28 |
| -25154.38 | -1.00 | -25116.37 | 4.33 | -25079.93 | 8.08  | -25047.11 | 8.23  | -25003.97 | 18.68 | -24968.44 | 21.53 | -24933.53 | 23.75 |
| -25153.07 | 0.31  | -25115.96 | 4.73 | -25078.59 | 9.43  | -25041.19 | 14.14 | -25006.66 | 15.99 | -24970.95 | 19.02 | -24930.92 | 26.37 |
| -25153.95 | -0.57 | -25114.42 | 6.27 | -25080.06 | 7.96  | -25041.00 | 14.33 | -25005.87 | 16.78 | -24970.97 | 18.99 | -24934.59 | 22.70 |
| -25154.49 | -1.11 | -25116.42 | 4.28 | -25078.32 | 9.69  | -25042.77 | 12.57 | -25006.02 | 16.63 | -24970.66 | 19.31 | -24932.70 | 24.58 |
| -25152.57 | 0.81  | -25117.34 | 3.36 | -25080.74 | 7.28  | -25038.71 | 16.62 | -25003.58 | 19.07 | -24968.11 | 21.86 | -24932.90 | 24.39 |
| -25153.73 | -0.35 | -25116.49 | 4.21 | -25079.70 | 8.32  | -25041.47 | 13.86 | -25004.75 | 17.90 | -24967.66 | 22.31 | -24930.24 | 27.04 |
| -25153.74 | -0.36 | -25116.57 | 4.13 | -25079.15 | 8.86  | -25044.71 | 10.63 | -25004.27 | 18.39 | -24965.27 | 24.70 | -24932.00 | 25.29 |
| -25153.99 | -0.61 | -25116.21 | 4.48 | -25080.26 | 7.75  | -25039.27 | 16.07 | -25006.47 | 16.18 | -24969.87 | 20.09 | -24927.08 | 30.20 |
| -25152.36 | 1.02  | -25116.14 | 4.56 | -25080.05 | 7.97  | -25041.03 | 14.30 | -25007.26 | 15.40 | -24971.98 | 17.99 | -24930.35 | 26.94 |
| -25153.77 | -0.39 | -25116.08 | 4.61 | -25079.67 | 8.34  | -25042.89 | 12.44 | -25000.20 | 22.45 | -24968.84 | 21.13 | -24933.85 | 23.43 |
| -25155.05 | -1.67 | -25117.51 | 3.19 | -25081.32 | 6.69  | -25043.11 | 12.22 | -25001.60 | 21.05 | -24965.73 | 24.24 | -24931.35 | 25.93 |
| -25153.87 | -0.49 | -25117.38 | 3.32 | -25079.65 | 8.36  | -25043.74 | 11.59 | -25008.37 | 14.28 | -24970.18 | 19.79 | -24932.72 | 24.56 |
| -25153.93 | -0.55 | -25117.04 | 3.66 | -25081.41 | 6.60  | -25042.31 | 13.02 | -25004.68 | 17.97 | -24968.61 | 21.36 | -24932.72 | 24.57 |
| -25154.13 | -0.75 | -25117.09 | 3.61 | -25079.87 | 8.14  | -25042.99 | 12.34 | -25003.98 | 18.67 | -24967.91 | 22.06 | -24933.38 | 23.91 |
| -25154.08 | -0.70 | -25116.12 | 4.58 | -25078.63 | 9.39  | -25042.00 | 13.33 | -25003.27 | 19.38 | -24966.03 | 23.94 | -24932.40 | 24.89 |
| -25153.88 | -0.50 | -25116.76 | 3.94 | -25076.49 | 11.53 | -25040.87 | 14.46 | -25005.98 | 16.67 | -24971.01 | 18.96 | -24932.79 | 24.50 |
| -25153.36 | 0.01  | -25116.43 | 4.27 | -25079.59 | 8.42  | -25043.85 | 11.48 | -25006.32 | 16.33 | -24970.20 | 19.77 | -24932.12 | 25.17 |
| -25154.38 | -1.00 | -25116.60 | 4.10 | -25080.83 | 7.18  | -25044.46 | 10.87 | -25006.05 | 16.60 | -24971.58 | 18.39 | -24933.05 | 24.23 |
| -25153.64 | -0.27 | -25117.85 | 2.85 | -25080.90 | 7.12  | -25044.93 | 10.40 | -25006.08 | 16.58 | -24971.13 | 18.84 | -24932.78 | 24.50 |
| -25153.95 | -0.57 | -25115.84 | 4.85 | -25078.42 | 9.60  | -25044.69 | 10.64 | -25005.66 | 16.99 | -24965.86 | 24.11 | -24933.34 | 23.95 |
| -25153.55 | -0.17 | -25114.61 | 6.09 | -25078.82 | 9.19  | -25041.77 | 13.57 | -25008.31 | 14.34 | -24969.07 | 20.90 | -24936.72 | 20.57 |
| -25152.76 | 0.62  | -25117.57 | 3.12 | -25080.91 | 7.10  | -25041.65 | 13.68 | -25005.69 | 16.97 | -24969.46 | 20.51 | -24933.52 | 23.77 |
| -25153.82 | -0.44 | -25114.77 | 5.93 | -25079.59 | 8.43  | -25043.14 | 12.20 | -25005.96 | 16.69 | -24968.29 | 21.68 | -24932.91 | 24.37 |
| -25153.10 | 0.28  | -25117.17 | 3.53 | -25080.78 | 7.23  | -25045.04 | 10.29 | -25005.77 | 16.88 | -24966.90 | 23.07 | -24928.62 | 28.67 |
| -25152.61 | 0.77  | -25115.45 | 5.25 | -25078.19 | 9.82  | -25043.68 | 11.65 | -25008.18 | 14.47 | -24967.18 | 22.79 | -24931.37 | 25.92 |
| -25148.25 | 5.13  | -25115.51 | 5.19 | -25080.21 | 7.81  | -25039.64 | 15.69 | -25004.29 | 18.36 | -24968.59 | 21.38 | -24931.36 | 25.93 |
| -25154.92 | -1.54 | -25113.82 | 6.88 | -25080.17 | 7.84  | -25044.43 | 10.90 | -25005.46 | 17.19 | -24962.23 | 27.74 | -24933.76 | 23.53 |
| -25153.28 | 0.10  | -25117.19 | 3.51 | -25079.86 | 8.15  | -25043.39 | 11.94 | -25006.52 | 16.13 | -24967.47 | 22.50 | -24929.85 | 27.44 |
| -25153.81 | -0.43 | -25116.58 | 4.12 | -25079.46 | 8.56  | -25036.82 | 18.51 | -25009.20 | 13.45 | -24971.01 | 18.96 | -24931.33 | 25.96 |
| -25152.58 | 0.80  | -25117.12 | 3.58 | -25079.55 | 8.47  | -25043.77 | 11.56 | -25006.78 | 15.87 | -24966.85 | 23.12 | -24933.03 | 24.25 |
| -25154.16 | -0.78 | -25117.72 | 2.98 | -25082.33 | 5.69  | -25042.76 | 12.58 | -25003.55 | 19.10 | -24971.19 | 18.78 | -24931.04 | 26.25 |
| -25153.85 | -0.47 | -25116.70 | 4.00 | -25079.79 | 8.23  | -25040.86 | 14.47 | -25005.65 | 17.01 | -24968.60 | 21.37 | -24932.12 | 25.16 |
| -25153.40 | -0.02 | -25116.66 | 4.04 | -25080.77 | 7.24  | -25043.83 | 11.50 | -25006.50 | 16.15 | -24965.01 | 24.96 | -24933.58 | 23.71 |
| -25153.84 | -0.46 | -25116.95 | 3.75 | -25074.08 | 13.93 | -25043.45 | 11.89 | -25004.69 | 17.96 | -24965.54 | 24.43 | -24932.46 | 24.82 |
| -25154.16 | -0.78 | -25116.63 | 4.06 | -25080.27 | 7.75  | -25042.40 | 12.94 | -25006.01 | 16.64 | -24969.10 | 20.87 | -24931.40 | 25.89 |
| -25152.91 | 0.47  | -25117.18 | 3.52 | -25077.29 | 10.73 | -25042.15 | 13.18 | -25005.10 | 17.55 | -24969.59 | 20.38 | -24931.61 | 25.68 |
| -25154.12 | -0.74 | -25115.18 | 5.52 | -25076.70 | 11.32 | -25042.94 | 12.40 | -25007.03 | 15.63 | -24972.06 | 17.91 | -24932.81 | 24.47 |
| -25153.54 | -0.16 | -25117.59 | 3.11 | -25081.31 | 6.70  | -25044.08 | 11.25 | -25007.08 | 15.57 | -24968.49 | 21.47 | -24936.45 | 20.84 |
| -25153.49 | -0.11 | -25117.71 | 2.99 | -25079.76 | 8.26  | -25042.41 | 12.93 | -25003.81 | 18.84 | -24971.84 | 18.13 | -24929.95 | 27.34 |

|           |       |           |       |           |       |           |       |           |       |           |       |           |       |
|-----------|-------|-----------|-------|-----------|-------|-----------|-------|-----------|-------|-----------|-------|-----------|-------|
| -25153.58 | -0.20 | -25117.36 | 3.34  | -25079.15 | 8.87  | -25042.60 | 12.73 | -25007.07 | 15.58 | -24971.81 | 18.16 | -24932.73 | 24.56 |
| -25153.71 | -0.33 | -25117.13 | 3.57  | -25080.18 | 7.83  | -25042.82 | 12.51 | -25006.77 | 15.88 | -24969.37 | 20.60 | -24930.87 | 26.42 |
| -25154.03 | -0.65 | -25076.70 | 44.00 | -25079.20 | 8.82  | -25042.64 | 12.69 | -25001.17 | 21.49 | -24968.90 | 21.07 | -24935.55 | 21.74 |
| -25154.44 | -1.06 | -25116.17 | 4.53  | -25078.89 | 9.13  | -25040.15 | 15.18 | -25005.45 | 17.21 | -24967.77 | 22.20 | -24934.59 | 22.70 |
| -25154.60 | -1.22 | -25115.18 | 5.52  | -25080.20 | 7.81  | -25041.51 | 13.83 | -25006.37 | 16.28 | -24970.67 | 19.30 | -24932.37 | 24.92 |
| -25153.03 | 0.35  | -25115.29 | 5.40  | -25079.49 | 8.52  | -25041.01 | 14.32 | -25006.06 | 16.59 | -24971.64 | 18.33 | -24932.19 | 25.09 |
| -25154.94 | -1.56 | -25116.85 | 3.84  | -25080.05 | 7.97  | -25041.37 | 13.96 | -25003.78 | 18.87 | -24967.89 | 22.08 | -24929.46 | 27.82 |
| -25153.47 | -0.09 | -25116.74 | 3.95  | -25079.57 | 8.45  | -25043.56 | 11.78 | -25002.07 | 20.58 | -24968.12 | 21.85 | -24933.90 | 23.38 |
| -25153.56 | -0.19 | -25116.13 | 4.57  | -25079.45 | 8.57  | -25040.65 | 14.68 | -25004.21 | 18.44 | -24973.04 | 16.93 | -24935.48 | 21.81 |
| -25152.51 | 0.87  | -25117.73 | 2.97  | -25079.55 | 8.46  | -25043.20 | 12.13 | -25005.29 | 17.36 | -24966.48 | 23.49 | -24929.21 | 28.08 |
| -25154.03 | -0.65 | -25116.14 | 4.56  | -25075.38 | 12.63 | -25042.58 | 12.76 | -25005.12 | 17.53 | -24970.37 | 19.60 | -24930.31 | 26.97 |
| -25153.86 | -0.48 | -25115.38 | 5.31  | -25077.76 | 10.26 | -25044.13 | 11.21 | -25006.41 | 16.24 | -24969.25 | 20.72 | -24934.99 | 22.30 |
| -25154.54 | -1.16 | -25115.37 | 5.33  | -25080.40 | 7.61  | -25043.52 | 11.82 | -25004.25 | 18.41 | -24971.52 | 18.45 | -24933.50 | 23.79 |
| -25154.00 | -0.62 | -25115.84 | 4.86  | -25080.87 | 7.14  | -25043.60 | 11.73 | -25007.74 | 14.91 | -24964.38 | 25.59 | -24930.10 | 27.19 |
| -25153.30 | 0.08  | -25079.00 | 41.70 | -25081.55 | 6.46  | -25046.21 | 9.13  | -25005.69 | 16.96 | -24967.82 | 22.15 | -24932.47 | 24.82 |
| -25153.11 | 0.27  | -25115.99 | 4.70  | -25078.62 | 9.40  | -25044.12 | 11.22 | -25006.48 | 16.17 | -24970.93 | 19.04 | -24933.85 | 23.43 |
| -25154.50 | -1.12 | -25115.83 | 4.87  | -25078.07 | 9.95  | -25045.56 | 9.78  | -25002.69 | 19.96 | -24971.36 | 18.61 | -24933.47 | 23.81 |
| -25153.94 | -0.56 | -25117.81 | 2.89  | -25078.60 | 9.42  | -25039.97 | 15.36 | -25006.07 | 16.58 | -24966.43 | 23.54 | -24935.98 | 21.30 |
| -25154.19 | -0.81 | -25116.29 | 4.41  | -25080.88 | 7.14  | -25040.63 | 14.70 | -25001.21 | 21.44 | -24962.70 | 27.27 | -24932.42 | 24.87 |
| -25154.64 | -1.26 | -25114.86 | 5.84  | -25081.13 | 6.89  | -25041.91 | 13.43 | -25008.17 | 14.48 | -24968.84 | 21.13 | -24933.18 | 24.10 |
| -25154.22 | -0.84 | -25117.14 | 3.56  | -25080.46 | 7.56  | -25041.29 | 14.04 | -25006.08 | 16.57 | -24967.21 | 22.76 | -24932.85 | 24.43 |
| -25153.27 | 0.11  | -25115.00 | 5.69  | -25079.38 | 8.63  | -25043.62 | 11.71 | -25003.67 | 18.99 | -24970.03 | 19.93 | -24929.25 | 28.04 |
| -25151.97 | 1.41  | -25117.00 | 3.70  | -25079.56 | 8.46  | -25042.86 | 12.47 | -25007.10 | 15.55 | -24967.94 | 22.03 | -24934.84 | 22.45 |
| -25153.26 | 0.12  | -25116.84 | 3.86  | -25079.09 | 8.93  | -25041.31 | 14.03 | -25005.40 | 17.25 | -24969.48 | 20.49 | -24934.07 | 23.22 |
| -25152.96 | 0.42  | -25116.78 | 3.92  | -25081.09 | 6.92  | -25042.73 | 12.61 | -25004.90 | 17.76 | -24970.97 | 19.00 | -24932.66 | 24.63 |
| -25153.90 | -0.52 | -25115.36 | 5.34  | -25077.88 | 10.13 | -25044.77 | 10.56 | -25005.50 | 17.15 | -24967.75 | 22.22 | -24935.41 | 21.88 |
| -25154.16 | -0.78 | -25114.64 | 6.06  | -25079.60 | 8.42  | -25044.12 | 11.22 | -25004.22 | 18.43 | -24968.67 | 21.30 | -24928.27 | 29.02 |
| -25153.15 | 0.23  | -25117.11 | 3.59  | -25080.69 | 7.33  | -25042.89 | 12.44 | -25006.98 | 15.67 | -24968.86 | 21.11 | -24931.61 | 25.68 |
| -25151.86 | 1.52  | -25114.76 | 5.94  | -25078.73 | 9.29  | -25040.22 | 15.11 | -25007.97 | 14.68 | -24968.71 | 21.26 | -24931.74 | 25.55 |
| -25152.71 | 0.67  | -25117.41 | 3.28  | -25080.38 | 7.63  | -25040.03 | 15.30 | -25005.70 | 16.95 | -24971.47 | 18.50 | -24933.95 | 23.34 |
| -25153.93 | -0.55 | -25118.53 | 2.17  | -25081.18 | 6.83  | -25042.70 | 12.63 | -25004.80 | 17.85 | -24969.73 | 20.24 | -24933.24 | 24.04 |
| -25153.29 | 0.09  | -25115.90 | 4.80  | -25077.97 | 10.04 | -25043.14 | 12.20 | -25002.87 | 19.78 | -24969.96 | 20.01 | -24931.11 | 26.18 |
| -25154.14 | -0.76 | -25115.92 | 4.77  | -25079.08 | 8.94  | -25044.06 | 11.27 | -25007.75 | 14.90 | -24966.56 | 23.41 | -24925.53 | 31.76 |
| -25153.15 | 0.23  | -25117.73 | 2.96  | -25079.34 | 8.68  | -25040.76 | 14.57 | -25003.66 | 18.99 | -24968.45 | 21.51 | -24934.85 | 22.43 |
| -25153.54 | -0.16 | -25116.08 | 4.62  | -25079.42 | 8.60  | -25040.99 | 14.34 | -25004.84 | 17.81 | -24970.29 | 19.68 | -24933.01 | 24.28 |
| -25153.90 | -0.52 | -25115.81 | 4.89  | -25078.41 | 9.61  | -25044.70 | 10.64 | -25006.50 | 16.16 | -24968.10 | 21.87 | -24932.04 | 25.25 |
| -25154.79 | -1.41 | -25116.42 | 4.28  | -25080.86 | 7.16  | -25044.56 | 10.77 | -25006.64 | 16.01 | -24969.15 | 20.82 | -24931.77 | 25.52 |
| -25153.53 | -0.15 | -25114.77 | 5.93  | -25079.07 | 8.94  | -25044.46 | 10.87 | -25006.18 | 16.47 | -24970.21 | 19.76 | -24932.78 | 24.51 |
| -25153.49 | -0.11 | -25115.57 | 5.13  | -25078.12 | 9.89  | -25043.31 | 12.03 | -25003.44 | 19.21 | -24969.48 | 20.49 | -24930.22 | 27.07 |
| -25153.54 | -0.16 | -25117.50 | 3.19  | -25076.03 | 11.99 | -25042.41 | 12.92 | -25004.48 | 18.17 | -24968.85 | 21.12 | -24932.52 | 24.76 |
| -25152.37 | 1.01  | -25117.54 | 3.16  | -25079.17 | 8.85  | -25043.74 | 11.60 | -25005.61 | 17.05 | -24969.18 | 20.79 | -24933.60 | 23.69 |

|           |       |           |      |           |       |           |       |           |       |           |       |
|-----------|-------|-----------|------|-----------|-------|-----------|-------|-----------|-------|-----------|-------|
| -25154.03 | -0.65 | -25118.10 | 2.60 | -25041.44 | 13.89 | -25007.58 | 15.07 | -24967.41 | 22.56 | -24931.80 | 25.49 |
| -25154.31 | -0.93 | -25115.69 | 5.01 | -25041.80 | 13.53 | -25005.84 | 16.82 | -24965.91 | 24.05 | -24932.46 | 24.83 |
| -25153.32 | 0.06  | -25116.25 | 4.45 | -25043.95 | 11.39 | -25007.31 | 15.34 | -24963.51 | 26.46 | -24931.08 | 26.21 |
| -25153.84 | -0.46 | -25116.89 | 3.81 | -25040.87 | 14.46 | -25005.09 | 17.56 | -24968.37 | 21.60 | -24932.45 | 24.83 |
| -25154.45 | -1.07 | -25117.82 | 2.88 | -25042.68 | 12.65 | -25005.06 | 17.59 | -24964.32 | 25.65 | -24931.97 | 25.32 |
| -25153.65 | -0.27 | -25117.39 | 3.31 |           |       |           |       | -24970.04 | 19.93 | -24932.10 | 25.19 |
| -25154.52 | -1.14 | -25115.96 | 4.73 |           |       |           |       | -24969.97 | 20.00 |           |       |
| -25153.76 | -0.38 | -25115.34 | 5.35 |           |       |           |       | -24969.79 | 20.18 |           |       |
| -25151.93 | 1.45  | -25116.20 | 4.50 |           |       |           |       |           |       |           |       |

Average energies -25153.57 -0.19 -25115.79 4.91 -25079.42 8.59 -25042.66 12.66 -25005.48 17.20 -24968.61 21.35 -24932.43 24.86

## Pu

ground state energy  
solid solution energy

concentration in solid solution (%)  
number of atoms

|           | 3     | 6         | 9    | 12        | 15    | 18        | 21    |           |       |           |       |           |       |
|-----------|-------|-----------|------|-----------|-------|-----------|-------|-----------|-------|-----------|-------|-----------|-------|
|           | 2     | 4         | 6    | 8         | 10    | 12        | 14    |           |       |           |       |           |       |
| -25148.99 | -1.60 | -25104.72 | 4.00 | -25060.15 | 9.91  | -25017.47 | 13.92 | -24973.51 | 19.21 | -24936.60 | 17.46 | -24893.98 | 21.41 |
| -25148.06 | -0.67 | -25105.58 | 3.15 | -25060.85 | 9.21  | -25019.27 | 12.12 | -24977.91 | 14.81 | -24935.19 | 18.86 | -24893.23 | 22.16 |
| -25148.80 | -1.41 | -25104.21 | 4.52 | -25062.12 | 7.94  | -25019.34 | 12.05 | -24975.69 | 17.03 | -24935.17 | 18.89 | -24891.62 | 23.77 |
| -25147.46 | -0.07 | -25104.15 | 4.58 | -25063.03 | 7.03  | -25016.51 | 14.88 | -24975.41 | 17.32 | -24934.80 | 19.25 | -24894.17 | 21.22 |
| -25148.39 | -1.00 | -25103.35 | 5.38 | -25058.42 | 11.64 | -25020.42 | 10.97 | -24975.31 | 17.42 | -24932.51 | 21.55 | -24892.73 | 22.66 |
| -25147.76 | -0.37 | -25105.05 | 3.68 | -25061.40 | 8.66  | -25017.98 | 13.42 | -24978.40 | 14.33 | -24934.75 | 19.30 | -24889.07 | 26.32 |
| -25148.40 | -1.01 | -25106.12 | 2.61 | -25063.00 | 7.06  | -25016.51 | 14.88 | -24976.41 | 16.31 | -24933.80 | 20.25 | -24892.00 | 23.39 |
| -25148.20 | -0.80 | -25105.18 | 3.54 | -25061.61 | 8.44  | -25017.84 | 13.55 | -24976.67 | 16.05 | -24936.07 | 17.99 | -24894.75 | 20.64 |
| -25146.73 | 0.66  | -25105.18 | 3.55 | -25061.18 | 8.88  | -25016.17 | 15.22 | -24976.66 | 16.06 | -24934.24 | 19.81 | -24892.86 | 22.53 |
| -25148.41 | -1.01 | -25104.62 | 4.10 | -25060.81 | 9.25  | -25021.36 | 10.03 | -24977.34 | 15.39 | -24934.03 | 20.03 | -24893.60 | 21.78 |
| -25148.61 | -1.21 | -25103.81 | 4.91 | -25063.78 | 6.28  | -25018.88 | 12.51 | -24978.89 | 13.83 | -24936.16 | 17.89 | -24893.28 | 22.11 |
| -25148.02 | -0.63 | -25103.29 | 5.44 | -25063.52 | 6.54  | -25016.55 | 14.84 | -24977.35 | 15.38 | -24936.76 | 17.29 | -24890.77 | 24.62 |
| -25147.86 | -0.47 | -25105.72 | 3.00 | -25062.97 | 7.09  | -25017.04 | 14.35 | -24978.13 | 14.59 | -24936.45 | 17.61 | -24891.77 | 23.62 |
| -25149.24 | -1.85 | -25103.24 | 5.48 | -25060.97 | 9.09  | -25020.57 | 10.82 | -24978.82 | 13.90 | -24935.16 | 18.89 | -24889.92 | 25.47 |
| -25146.24 | 1.16  | -25104.33 | 4.39 | -25063.40 | 6.65  | -25018.31 | 13.08 | -24976.97 | 15.76 | -24938.58 | 15.48 | -24892.15 | 23.24 |
| -25147.76 | -0.37 | -25103.69 | 5.03 | -25063.71 | 6.35  | -25020.24 | 11.15 | -24977.05 | 15.68 | -24936.56 | 17.49 | -24890.65 | 24.74 |
| -25148.05 | -0.65 | -25104.95 | 3.78 | -25059.44 | 10.62 | -25020.76 | 10.63 | -24976.27 | 16.46 | -24935.08 | 18.98 | -24893.44 | 21.95 |
| -25147.55 | -0.15 | -25105.04 | 3.69 | -25061.37 | 8.69  | -25019.41 | 11.98 | -24976.34 | 16.38 | -24931.17 | 22.89 | -24891.45 | 23.94 |
| -25148.24 | -0.84 | -25103.88 | 4.85 | -25061.68 | 8.38  | -25020.14 | 11.25 | -24978.96 | 13.76 | -24935.50 | 18.56 | -24891.57 | 23.82 |
| -25147.78 | -0.38 | -25104.82 | 3.91 | -25061.75 | 8.31  | -25020.60 | 10.79 | -24977.26 | 15.46 | -24935.05 | 19.00 | -24892.57 | 22.82 |
| -25149.13 | -1.74 | -25104.37 | 4.36 | -25063.58 | 6.48  | -25018.40 | 12.99 | -24979.55 | 13.17 | -24935.40 | 19.00 | -24893.99 | 21.40 |
| -25148.37 | -0.97 | -25103.25 | 5.47 | -25064.69 | 5.37  | -25018.18 | 13.22 | -24977.15 | 15.58 | -24935.38 | 18.66 | -24891.50 | 23.89 |
| -25146.93 | 0.46  | -25103.99 | 4.74 | -25062.10 | 7.96  | -25019.90 | 11.49 | -24974.51 | 18.21 | -24936.23 | 18.68 | -24890.70 | 24.69 |

|           |       |           |      |           |       |           |       |           |       |           |       |           |       |
|-----------|-------|-----------|------|-----------|-------|-----------|-------|-----------|-------|-----------|-------|-----------|-------|
| -25147.46 | -0.06 | -25105.30 | 3.43 | -25059.41 | 10.65 | -25020.61 | 10.78 | -24976.91 | 15.82 | -24935.61 | 17.83 | -24891.74 | 23.65 |
| -25148.04 | -0.65 | -25103.95 | 4.77 | -25061.71 | 8.35  | -25020.38 | 11.01 | -24977.15 | 15.57 | -24934.82 | 18.44 | -24894.55 | 20.84 |
| -25148.83 | -1.44 | -25104.45 | 4.27 | -25064.03 | 6.03  | -25019.49 | 11.90 | -24972.76 | 19.96 | -24935.42 | 19.23 | -24890.11 | 25.27 |
| -25146.90 | 0.50  | -25104.22 | 4.51 | -25064.36 | 5.70  | -25018.41 | 12.98 | -24974.12 | 18.60 | -24935.58 | 18.64 | -24892.11 | 23.28 |
| -25149.00 | -1.60 | -25106.62 | 2.10 | -25061.79 | 8.27  | -25018.96 | 12.43 | -24976.40 | 16.33 | -24931.86 | 18.48 | -24893.22 | 22.17 |
| -25147.47 | -0.08 | -25104.28 | 4.44 | -25063.03 | 7.03  | -25017.95 | 13.44 | -24979.01 | 13.71 | -24935.03 | 22.19 | -24893.12 | 22.27 |
| -25146.95 | 0.44  | -25106.16 | 2.57 | -25057.59 | 12.47 | -25020.56 | 10.84 | -24974.71 | 18.02 | -24932.64 | 19.03 | -24893.15 | 22.24 |
| -25147.94 | -0.54 | -25104.79 | 3.94 | -25063.26 | 6.80  | -25021.12 | 10.27 | -24974.92 | 17.81 | -24938.24 | 21.42 | -24890.10 | 25.29 |
| -25147.78 | -0.39 | -25104.23 | 4.50 | -25063.25 | 6.81  | -25021.62 | 9.77  | -24976.34 | 16.39 | -24935.76 | 15.81 | -24895.36 | 20.03 |
| -25147.50 | -0.10 | -25104.66 | 4.06 | -25062.18 | 7.88  | -25016.30 | 15.10 | -24975.97 | 16.75 | -24934.83 | 18.30 | -24894.09 | 21.30 |
| -25148.02 | -0.63 | -25105.62 | 3.10 | -25064.12 | 5.94  | -25019.89 | 11.50 | -24979.75 | 12.97 | -24935.58 | 19.23 | -24891.84 | 23.55 |
| -25148.20 | -0.80 | -25105.07 | 3.65 | -25064.14 | 5.92  | -25021.96 | 9.43  | -24976.82 | 15.91 | -24932.39 | 18.47 | -24891.99 | 23.40 |
| -25147.54 | -0.14 | -25105.99 | 2.74 | -25061.94 | 8.12  | -25017.30 | 14.09 | -24976.48 | 16.24 | -24935.23 | 21.67 | -24893.29 | 22.10 |
| -25147.41 | -0.01 | -25104.92 | 3.81 | -25061.23 | 8.83  | -25019.15 | 12.24 | -24977.06 | 15.67 | -24937.78 | 18.83 | -24891.72 | 23.66 |
| -25146.73 | 0.66  | -25105.04 | 3.69 | -25061.66 | 8.40  | -25017.15 | 14.24 | -24977.40 | 15.32 | -24936.91 | 16.27 | -24891.32 | 24.07 |
| -25147.61 | -0.22 | -25105.12 | 3.61 | -25061.85 | 8.21  | -25015.60 | 15.79 | -24978.28 | 14.44 | -24935.59 | 17.15 | -24894.09 | 21.30 |
| -25147.76 | -0.37 | -25105.23 | 3.49 | -25064.01 | 6.05  | -25017.95 | 13.44 | -24977.23 | 15.50 | -24935.30 | 18.47 | -24887.91 | 27.48 |
| -25148.65 | -1.25 | -25103.50 | 5.23 | -25061.51 | 8.55  | -25019.85 | 11.54 | -24977.10 | 15.62 | -24935.41 | 18.76 | -24892.35 | 23.04 |
| -25147.02 | 0.38  | -25105.90 | 2.83 | -25063.98 | 6.08  | -25018.65 | 12.74 | -24976.88 | 15.85 | -24930.70 | 18.65 | -24892.62 | 22.77 |
| -25146.80 | 0.60  | -25105.17 | 3.55 | -25061.80 | 8.26  | -25018.53 | 12.86 | -24977.76 | 14.96 | -24934.93 | 23.35 | -24894.58 | 20.81 |
| -25148.73 | -1.34 | -25104.63 | 4.10 | -25062.94 | 7.12  | -25018.22 | 13.17 | -24976.22 | 16.51 | -24936.86 | 19.12 | -24892.25 | 23.14 |
| -25148.67 | -1.28 | -25104.43 | 4.30 | -25064.11 | 5.95  | -25021.23 | 10.16 | -24976.39 | 16.33 | -24934.56 | 17.19 | -24892.71 | 22.68 |
| -25148.32 | -0.93 | -25105.20 | 3.53 | -25062.19 | 7.87  | -25018.69 | 12.70 | -24976.35 | 16.38 | -24936.82 | 19.49 | -24892.75 | 22.64 |
| -25147.93 | -0.53 | -25103.56 | 5.16 | -25063.19 | 6.87  | -25019.29 | 12.10 | -24976.07 | 16.65 | -24935.10 | 17.24 | -24894.23 | 21.16 |
| -25147.59 | -0.20 | -25105.70 | 3.03 | -25061.41 | 8.65  | -25018.33 | 13.06 | -24977.15 | 15.57 | -24935.16 | 18.96 | -24890.90 | 24.48 |
| -25149.00 | -1.60 | -25105.66 | 3.07 | -25059.72 | 10.34 | -25020.16 | 11.23 | -24974.90 | 17.83 | -24932.42 | 18.90 | -24892.45 | 22.94 |
| -25148.12 | -0.72 | -25106.08 | 2.65 | -25061.71 | 8.35  | -25019.31 | 12.08 | -24979.28 | 13.44 | -24935.62 | 21.64 | -24894.84 | 20.55 |
| -25148.44 | -1.04 | -25105.66 | 3.07 | -25064.01 | 6.05  | -25018.95 | 12.44 | -24977.05 | 15.67 | -24935.58 | 18.43 | -24892.84 | 22.54 |
| -25148.04 | -0.65 | -25105.23 | 3.49 | -25058.36 | 11.70 | -25019.96 | 11.43 | -24976.05 | 16.67 | -24934.92 | 18.47 | -24892.34 | 23.04 |
| -25148.99 | -1.59 | -25105.07 | 3.66 | -25061.77 | 8.29  | -25020.01 | 11.39 | -24974.31 | 18.41 | -24937.03 | 19.14 | -24891.76 | 23.63 |
| -25147.66 | -0.27 | -25104.91 | 3.82 | -25061.30 | 8.76  | -25019.48 | 11.91 | -24977.13 | 15.59 | -24933.53 | 17.03 | -24892.74 | 22.65 |
| -25149.08 | -1.68 | -25106.26 | 2.47 | -25063.21 | 6.85  | -25020.00 | 11.39 | -24977.94 | 14.78 | -24931.78 | 20.53 | -24891.78 | 23.61 |
| -25147.87 | -0.48 | -25105.97 | 2.76 | -25061.27 | 8.79  | -25020.36 | 11.03 | -24978.55 | 14.17 | -24935.18 | 22.27 | -24892.55 | 22.83 |
| -25147.51 | -0.12 | -25105.60 | 3.13 | -25063.28 | 6.78  | -25020.37 | 11.02 | -24976.51 | 16.22 | -24934.94 | 18.88 | -24892.17 | 23.22 |
| -25148.03 | -0.63 | -25103.34 | 5.39 | -25063.89 | 6.16  | -25016.32 | 15.07 | -24977.47 | 15.26 | -24935.20 | 19.12 | -24894.57 | 20.82 |
| -25147.36 | 0.03  | -25106.88 | 1.84 | -25062.96 | 7.10  | -25021.17 | 10.22 | -24973.83 | 18.89 | -24935.41 | 18.85 | -24892.03 | 23.36 |
| -25148.84 | -1.45 | -25105.29 | 3.43 | -25061.51 | 8.55  | -25015.75 | 15.64 | -24976.48 | 16.25 | -24936.22 | 18.64 | -24892.88 | 22.51 |
| -25146.23 | 1.17  | -25102.62 | 6.10 | -25060.89 | 9.17  | -25020.42 | 10.97 | -24979.90 | 12.83 | -24935.08 | 17.83 | -24892.58 | 22.81 |
| -25147.92 | -0.53 | -25104.93 | 3.79 | -25062.49 | 7.56  | -25020.85 | 10.54 | -24975.51 | 17.22 | -24936.50 | 18.97 | -24893.96 | 21.43 |
| -25147.55 | -0.16 | -25103.34 | 5.39 | -25062.45 | 7.61  | -25017.05 | 14.35 | -24977.93 | 14.79 | -24935.50 | 17.55 | -24892.86 | 22.53 |
| -25149.24 | -1.84 | -25103.60 | 5.13 | -25061.04 | 9.02  | -25019.14 | 12.25 | -24977.77 | 14.95 | -24937.82 | 18.56 | -24893.08 | 22.30 |

|           |       |           |      |           |       |           |       |           |       |           |       |           |       |
|-----------|-------|-----------|------|-----------|-------|-----------|-------|-----------|-------|-----------|-------|-----------|-------|
| -25148.02 | -0.63 | -25105.64 | 3.08 | -25062.16 | 7.90  | -25021.23 | 10.16 | -24975.62 | 17.10 | -24937.99 | 16.24 | -24891.36 | 24.03 |
| -25145.51 | 1.88  | -25104.85 | 3.08 | -25063.51 | 6.55  | -25014.59 | 16.80 | -24978.52 | 14.21 | -24935.41 | 16.07 | -24891.26 | 24.13 |
| -25147.82 | -0.42 | -25104.38 | 3.87 | -25058.74 | 11.32 | -25019.60 | 11.79 | -24976.36 | 16.36 | -24936.55 | 18.64 | -24895.50 | 19.89 |
| -25148.39 | -0.99 | -25105.89 | 4.34 | -25061.41 | 8.65  | -25020.23 | 11.16 | -24975.40 | 17.33 | -24927.83 | 17.51 | -24894.48 | 20.91 |
| -25148.58 | -1.19 | -25106.82 | 2.83 | -25062.55 | 7.51  | -25021.04 | 10.36 | -24977.96 | 14.77 | -24935.88 | 26.23 | -24892.12 | 23.27 |
| -25147.58 | -0.18 | -25102.08 | 1.91 | -25062.63 | 7.43  | -25018.99 | 12.41 | -24978.45 | 14.27 | -24932.20 | 18.18 | -24890.59 | 24.80 |
| -25147.86 | -0.47 | -25105.48 | 6.65 | -25063.29 | 6.76  | -25020.13 | 11.27 | -24975.31 | 17.41 | -24933.49 | 21.85 | -24892.79 | 22.60 |
| -25150.44 | -3.05 | -25105.96 | 3.24 | -25060.51 | 9.55  | -25021.15 | 10.24 | -24977.13 | 15.59 | -24935.18 | 21.85 | -24892.54 | 22.85 |
| -25147.04 | 0.35  | -25102.79 | 2.77 | -25059.82 | 10.24 | -25018.72 | 12.67 | -24975.25 | 17.47 | -24937.91 | 20.57 | -24892.36 | 23.02 |
| -25147.10 | 0.29  | -25103.70 | 5.94 | -25062.54 | 7.52  | -25019.62 | 11.77 | -24976.30 | 16.42 | -24934.21 | 18.87 | -24893.27 | 22.11 |
| -25147.67 | -0.27 | -25104.47 | 5.03 | -25063.24 | 6.82  | -25021.53 | 9.86  | -24977.22 | 15.50 | -24936.86 | 16.15 | -24891.32 | 24.06 |
| -25147.67 | -0.27 | -25104.75 | 4.26 | -25063.47 | 6.59  | -25019.82 | 11.57 | -24977.85 | 14.87 | -24936.61 | 19.84 | -24893.34 | 22.04 |
| -25147.39 | 0.00  | -25104.04 | 3.98 | -25059.48 | 10.58 | -25020.49 | 10.91 | -24974.90 | 17.82 | -24933.28 | 17.20 | -24890.26 | 25.12 |
| -25147.89 | -0.50 | -25105.59 | 4.69 | -25062.02 | 8.04  | -25021.27 | 10.12 | -24977.88 | 14.84 | -24931.43 | 17.45 | -24894.78 | 20.61 |
| -25147.02 | 0.37  | -25105.02 | 3.14 | -25062.69 | 7.37  | -25019.36 | 12.03 | -24974.16 | 18.56 | -24931.19 | 20.78 | -24892.19 | 23.20 |
| -25147.67 | -0.27 | -25104.27 | 3.71 | -25064.06 | 6.00  | -25020.71 | 10.68 | -24978.08 | 14.64 | -24929.77 | 22.63 | -24894.56 | 20.83 |
| -25147.08 | 0.31  | -25104.24 | 4.45 | -25061.87 | 8.19  | -25022.09 | 9.30  | -24977.72 | 15.00 | -24934.12 | 22.86 | -24894.22 | 21.17 |
| -25147.79 | -0.40 | -25103.84 | 4.49 | -25061.72 | 8.34  | -25020.12 | 11.27 | -24977.78 | 14.95 | -24934.14 | 24.28 | -24893.73 | 21.65 |
| -25147.59 | -0.20 | -25103.20 | 4.89 | -25061.38 | 8.68  | -25022.86 | 8.53  | -24971.68 | 21.04 | -24931.76 | 19.94 | -24889.62 | 25.77 |
| -25146.96 | 0.44  | -25104.69 | 5.53 | -25062.13 | 7.93  | -25017.81 | 13.58 | -24977.40 | 15.32 | -24932.70 | 19.92 | -24891.82 | 23.57 |
| -25147.86 | -0.47 | -25103.71 | 4.04 | -25060.39 | 9.67  | -25022.08 | 9.31  | -24973.64 | 19.09 | -24935.64 | 22.29 | -24894.15 | 21.24 |
| -25145.88 | 1.52  | -25105.26 | 5.02 | -25062.83 | 7.23  | -25018.62 | 12.77 | -24977.92 | 14.80 | -24933.09 | 21.36 | -24892.20 | 23.19 |
| -25148.11 | -0.71 | -25106.01 | 3.47 | -25061.89 | 8.17  | -25021.41 | 9.98  | -24974.07 | 18.65 | -24933.27 | 18.42 | -24895.11 | 20.28 |
| -25149.05 | -1.66 | -25106.09 | 2.72 | -25062.74 | 7.32  | -25019.67 | 11.72 | -24977.41 | 15.32 | -24936.32 | 20.97 | -24890.88 | 24.50 |
| -25149.42 | -2.02 | -25105.86 | 2.64 | -25062.18 | 7.88  | -25017.69 | 13.70 | -24978.65 | 14.07 | -24932.92 | 20.79 | -24894.35 | 21.04 |
| -25147.43 | -0.03 | -25104.64 | 2.86 | -25063.00 | 7.06  | -25022.28 | 9.11  | -24976.35 | 16.37 | -24934.90 | 17.74 | -24895.26 | 20.13 |
| -25149.07 | -1.68 | -25105.80 | 4.09 | -25060.74 | 9.32  | -25020.86 | 10.53 | -24978.17 | 14.55 | -24934.16 | 21.14 | -24889.09 | 26.30 |
| -25148.51 | -1.11 | -25105.33 | 2.93 | -25060.87 | 9.19  | -25021.41 | 9.98  | -24976.55 | 16.17 | -24934.79 | 19.16 | -24891.33 | 24.06 |
| -25146.71 | 0.69  | -25104.25 | 3.40 | -25060.98 | 9.08  | -25019.50 | 11.89 | -24977.93 | 14.80 | -24933.67 | 19.90 | -24886.11 | 29.28 |
| -25148.61 | -1.21 | -25105.43 | 4.48 | -25063.90 | 6.16  | -25021.64 | 9.75  | -24978.19 | 14.53 | -24936.28 | 19.27 | -24890.78 | 24.61 |
| -25147.87 | -0.48 | -25105.71 | 3.30 | -25062.44 | 7.62  | -25020.69 | 10.70 | -24977.29 | 15.43 | -24935.91 | 20.39 | -24892.14 | 23.25 |
| -25148.59 | -1.20 | -25106.18 | 3.02 | -25063.57 | 6.49  | -25021.18 | 10.21 | -24978.46 | 14.26 | -24935.20 | 17.78 | -24890.16 | 25.23 |
| -25147.85 | -0.46 | -25104.90 | 2.55 | -25062.97 | 7.09  | -25018.27 | 13.12 | -24976.00 | 16.73 | -24936.12 | 18.14 | -24894.01 | 21.38 |
| -25148.05 | -0.66 | -25105.28 | 3.82 | -25060.42 | 9.64  | -25017.41 | 13.98 | -24979.48 | 13.25 | -24937.20 | 18.86 | -24895.47 | 19.92 |
| -25146.38 | 1.02  | -25106.72 | 3.45 | -25061.28 | 8.78  | -25018.67 | 12.72 | -24977.21 | 15.51 | -24933.25 | 17.93 | -24892.57 | 22.82 |
| -25146.95 | 0.44  | -25102.08 | 2.01 | -25060.89 | 9.17  | -25021.26 | 10.13 | -24975.02 | 17.70 | -24933.41 | 16.86 | -24892.17 | 23.22 |
| -25147.89 | -0.50 | -25106.05 | 6.64 | -25060.78 | 9.28  | -25018.24 | 13.16 | -24975.07 | 17.65 | -24936.67 | 20.81 | -24891.27 | 24.12 |
| -25148.53 | -1.13 | -25106.14 | 2.68 | -25061.58 | 8.48  | -25022.25 | 9.14  | -24977.77 | 14.95 | -24935.28 | 20.64 | -24893.48 | 21.91 |
| -25149.29 | -1.89 | -25104.31 | 2.58 | -25061.87 | 8.19  | -25018.64 | 12.75 | -24977.75 | 14.97 | -24934.53 | 17.39 | -24894.97 | 20.42 |
| -25147.82 | -0.43 | -25104.56 | 4.42 | -25062.31 | 7.75  | -25021.06 | 10.33 | -24976.64 | 16.08 | -24931.06 | 18.77 | -24893.72 | 21.67 |
| -25146.57 | 0.83  | -25106.15 | 4.17 | -25062.11 | 7.95  | -25020.75 | 10.64 | -24977.60 | 15.13 | -24936.26 | 19.53 | -24893.48 | 21.91 |

|                  |           |           |           |           |           |           |           |           |           |           |           |           |           |       |
|------------------|-----------|-----------|-----------|-----------|-----------|-----------|-----------|-----------|-----------|-----------|-----------|-----------|-----------|-------|
| -25148.35        | -0.95     | -25103.96 | 2.58      | -25059.93 | 10.13     | -25019.30 | 12.09     | -24979.34 | 13.38     | -24935.32 | 23.00     | -24888.52 | 26.87     |       |
| -25148.73        | -1.34     | -25104.87 | 4.76      | -25062.85 | 7.21      | -25020.34 | 11.05     | -24979.74 | 12.98     | -24934.28 | 17.80     | -24891.03 | 24.36     |       |
| -25148.43        | -1.03     | -25105.85 | 3.86      | -25061.42 | 8.64      | -25020.18 | 11.21     | -24978.16 | 14.56     | -24934.97 | 18.73     | -24891.56 | 23.83     |       |
| -25147.99        | -0.60     | -25104.86 | 2.88      | -25060.15 | 9.91      | -25018.70 | 12.69     | -24977.82 | 14.90     | -24934.26 | 19.78     | -24893.58 | 21.81     |       |
| -25148.20        | -0.81     | -25102.91 | 3.87      | -25060.16 | 9.90      | -25020.64 | 10.75     | -24976.63 | 16.10     | -24938.17 | 19.09     | -24892.23 | 23.16     |       |
| -25147.52        | -0.13     | -25104.62 | 5.81      | -25063.84 | 6.22      | -25018.82 | 12.57     | -24975.50 | 17.23     | -24931.89 | 19.80     | -24891.70 | 23.69     |       |
| -25148.09        | -0.69     | -25105.55 | 4.11      | -25061.92 | 8.14      | -25019.36 | 12.03     | -24976.51 | 16.21     | -24932.78 | 15.89     | -24892.34 | 23.05     |       |
| -25147.92        | -0.52     | -25106.23 | 3.18      | -25062.20 | 7.86      | -25018.10 | 13.29     | -24979.49 | 13.24     | -24937.29 | 22.17     | -24892.68 | 22.71     |       |
| -25148.51        | -1.12     | -25103.95 | 2.50      | -25062.21 | 7.85      | -25021.51 | 9.89      | -24975.16 | 17.57     | -24935.83 | 21.28     | -24893.53 | 21.86     |       |
| -25148.16        | -0.76     | -25106.35 | 4.77      | -25059.08 | 10.98     | -25021.17 | 10.22     | -24977.76 |           |           |           | -24893.48 | 21.91     |       |
| -25148.04        | -0.64     | -25104.50 | 2.38      | -25062.60 | 7.46      |           |           | -24977.29 |           |           |           | -24889.08 | 26.31     |       |
| -25147.80        | -0.53     | -25104.99 | 4.23      | -25061.41 | 8.65      |           |           | -24976.49 |           |           |           | -24893.73 | 21.66     |       |
| -25147.75        | -0.52     | -25105.08 | 3.74      | -25059.73 | 10.33     |           |           | -24978.77 |           |           |           | -24891.92 | 23.47     |       |
| -25148.04        | -0.52     | -25106.05 | 3.64      |           |           |           |           |           |           |           |           |           |           |       |
| -25147.99        | -0.51     |           |           |           |           |           |           |           |           |           |           |           |           |       |
| Average energies | -25147.92 | -0.53     | -25104.86 | 3.87      | -25061.97 | 8.09      | -25019.49 | 11.90     | -24976.89 | 15.86     | -24934.87 | 19.24     | -24892.45 | 22.94 |

## Th

concentration in solid solution (%)  
number of atoms

| ground state energy | solid solution energy |           |      |           |       |           |       |           |       |           |       |           |       |
|---------------------|-----------------------|-----------|------|-----------|-------|-----------|-------|-----------|-------|-----------|-------|-----------|-------|
|                     |                       | 3         | 6    | 9         | 12    | 15        | 18    | 21        |       |           |       |           |       |
|                     |                       | 2         | 4    | 6         | 8     | 10        | 12    | 14        |       |           |       |           |       |
| -25153.93           | -0.91                 | -25115.85 | 4.14 | -25078.81 | 8.14  | -25037.52 | 16.39 | -25006.80 | 14.07 | -24967.04 | 20.80 | -24930.28 | 24.53 |
| -25153.94           | -0.91                 | -25113.53 | 6.46 | -25074.76 | 12.19 | -25042.04 | 11.87 | -25006.51 | 14.37 | -24967.78 | 20.05 | -24925.21 | 29.59 |
| -25153.63           | -0.61                 | -25117.20 | 2.78 | -25077.49 | 9.46  | -25040.21 | 13.70 | -25001.52 | 19.36 | -24970.46 | 17.38 | -24929.93 | 24.87 |
| -25154.06           | -1.04                 | -25116.09 | 3.90 | -25079.42 | 7.53  | -25036.83 | 17.08 | -25003.10 | 17.78 | -24969.01 | 18.83 | -24928.30 | 26.50 |
| -25153.28           | -0.26                 | -25116.70 | 3.29 | -25078.81 | 8.14  | -25039.30 | 14.61 | -25006.56 | 14.31 | -24967.68 | 20.16 | -24928.40 | 26.40 |
| -25153.31           | -0.29                 | -25114.61 | 5.38 | -25078.38 | 8.57  | -25041.26 | 12.65 | -25004.78 | 16.09 | -24967.17 | 20.66 | -24925.23 | 29.57 |
| -25153.50           | -0.48                 | -25116.58 | 3.41 | -25079.49 | 7.46  | -25041.39 | 12.52 | -25004.74 | 16.14 | -24966.30 | 21.54 | -24925.97 | 28.84 |
| -25153.17           | -0.14                 | -25115.20 | 4.79 | -25079.39 | 7.56  | -25039.78 | 14.13 | -25000.34 | 20.53 | -24967.67 | 20.17 | -24925.19 | 29.61 |
| -25153.22           | -0.19                 | -25114.93 | 5.06 | -25074.63 | 12.32 | -25042.63 | 11.28 | -25000.10 | 20.78 | -24964.44 | 23.39 | -24927.76 | 27.04 |
| -25152.68           | 0.35                  | -25116.82 | 3.17 | -25078.39 | 8.56  | -25041.49 | 12.42 | -25003.26 | 17.62 | -24967.29 | 20.55 | -24925.29 | 29.51 |
| -25154.53           | -1.50                 | -25117.32 | 2.67 | -25079.20 | 7.75  | -25041.73 | 12.18 | -25003.19 | 17.68 | -24960.87 | 26.97 | -24931.56 | 23.24 |
| -25152.07           | 0.96                  | -25115.14 | 4.84 | -25076.43 | 10.52 | -25044.43 | 9.49  | -25001.85 | 19.03 | -24964.03 | 23.81 | -24927.52 | 27.28 |
| -25153.70           | -0.67                 | -25114.47 | 5.51 | -25079.27 | 7.68  | -25041.74 | 12.17 | -25006.15 | 14.72 | -24967.77 | 20.07 | -24931.72 | 23.08 |
| -25152.62           | 0.40                  | -25115.92 | 4.06 | -25079.48 | 7.47  | -25039.60 | 14.31 | -25004.32 | 16.55 | -24964.51 | 23.33 | -24928.27 | 26.53 |
| -25153.15           | -0.13                 | -25116.51 | 3.48 | -25077.37 | 9.58  | -25040.73 | 13.19 | -24999.98 | 20.90 | -24964.80 | 23.04 | -24926.39 | 28.41 |
| -25152.84           | 0.19                  | -25116.00 | 3.99 | -25080.85 | 6.10  | -25038.67 | 15.24 | -25000.04 | 20.83 | -24963.46 | 24.37 | -24931.47 | 23.33 |
| -25154.42           | -1.39                 | -25117.18 | 2.81 | -25078.86 | 8.09  | -25042.60 | 11.31 | -25001.78 | 19.10 | -24963.41 | 24.43 | -24928.19 | 26.61 |



|           |       |           |      |           |       |           |       |           |       |           |       |           |       |
|-----------|-------|-----------|------|-----------|-------|-----------|-------|-----------|-------|-----------|-------|-----------|-------|
| -25153.47 | -0.45 | -25116.08 | 3.91 | -25076.43 | 10.52 | -25036.68 | 17.23 | -25004.21 | 16.66 | -24964.61 | 23.23 | -24927.36 | 27.44 |
| -25151.84 | 1.18  | -25115.76 | 4.22 | -25075.32 | 11.63 | -25043.97 | 9.94  | -25002.79 | 18.08 | -24964.35 | 23.49 | -24928.66 | 26.14 |
| -25153.74 | -0.72 | -25116.70 | 3.29 | -25077.60 | 9.35  | -25040.67 | 13.24 | -25001.92 | 18.96 | -24966.31 | 21.53 | -24930.43 | 24.37 |
| -25153.24 | -0.22 | -25115.06 | 4.93 | -25078.89 | 8.06  | -25040.02 | 13.89 | -25005.47 | 15.41 | -24967.36 | 20.48 | -24925.52 | 29.28 |
| -25153.60 | -0.58 | -25116.69 | 3.30 | -25077.43 | 9.52  | -25039.40 | 14.51 | -25002.92 | 17.96 | -24966.29 | 21.54 | -24929.03 | 25.77 |
| -25153.12 | -0.09 | -25115.90 | 4.09 | -25078.70 | 8.25  | -25040.38 | 13.53 | -25004.93 | 15.94 | -24967.00 | 20.84 | -24928.11 | 26.69 |
| -25153.85 | -0.83 | -25115.57 | 4.41 | -25077.03 | 9.92  | -25040.78 | 13.13 | -25004.89 | 15.98 | -24965.75 | 22.09 | -24928.89 | 25.91 |
| -25152.67 | 0.36  | -25114.75 | 5.24 | -25077.90 | 9.05  | -25043.23 | 10.68 | -25002.20 | 18.68 | -24964.05 | 23.79 | -24930.38 | 24.42 |
| -25154.39 | -1.37 | -25115.19 | 4.80 | -25077.33 | 9.62  | -25038.77 | 15.15 | -25003.47 | 17.41 | -24966.48 | 21.36 | -24931.08 | 23.72 |
| -25153.42 | -0.39 | -25112.75 | 7.24 | -25075.65 | 11.30 | -25038.60 | 15.31 | -25001.63 | 19.24 | -24966.54 | 21.29 | -24930.83 | 23.97 |
| -25153.62 | -0.60 | -25116.68 | 3.30 | -25075.19 | 11.76 | -25038.24 | 15.67 | -25000.94 | 19.94 | -24963.77 | 24.07 | -24930.50 | 24.30 |
| -25152.68 | 0.35  | -25116.06 | 3.92 | -25078.87 | 8.08  | -25040.81 | 13.10 | -25001.19 | 19.69 | -24967.30 | 20.54 | -24930.84 | 23.97 |
| -25154.72 | -1.70 | -25115.22 | 4.77 | -25080.02 | 6.93  | -25043.81 | 10.10 | -25005.55 | 15.33 | -24966.83 | 21.01 | -24931.28 | 23.52 |
| -25153.94 | -0.92 | -25117.85 | 2.14 | -25080.89 | 6.06  | -25042.22 | 11.69 | -25003.72 | 17.16 | -24967.61 | 20.23 | -24928.24 | 26.56 |
| -25152.39 | 0.63  | -25113.89 | 6.09 | -25079.91 | 7.04  | -25040.03 | 13.88 | -25004.78 | 16.09 | -24967.54 | 20.30 | -24928.62 | 26.18 |
| -25153.29 | -0.26 | -25115.56 | 4.42 | -25079.19 | 7.77  | -25041.36 | 12.56 | -25000.86 | 20.01 | -24963.54 | 24.29 | -24928.50 | 26.30 |
| -25154.06 | -1.03 | -25116.78 | 3.20 | -25075.68 | 11.27 | -25040.83 | 13.09 | -25006.92 | 13.95 | -24967.47 | 20.37 | -24929.68 | 25.12 |
| -25153.98 | -0.95 | -25115.32 | 4.67 | -25077.16 | 9.79  | -25040.41 | 13.51 | -25004.76 | 16.12 | -24964.57 | 23.26 | -24932.20 | 22.60 |
| -25154.13 | -1.10 | -25114.97 | 5.02 | -25076.75 | 10.20 | -25040.95 | 12.97 | -25007.28 | 13.60 | -24965.86 | 21.98 | -24926.39 | 28.41 |
| -25153.39 | -0.37 | -25114.35 | 5.64 | -25077.20 | 9.75  | -25039.58 | 14.33 | -25005.28 | 15.60 | -24959.70 | 28.14 | -24926.17 | 28.63 |
| -25153.07 | -0.04 | -25116.69 | 3.30 | -25077.54 | 9.41  | -25041.58 | 12.33 | -25004.68 | 16.20 | -24966.29 | 21.54 | -24931.13 | 23.67 |
| -25153.78 | -0.76 | -25115.52 | 4.47 | -25078.51 | 8.44  | -25042.34 | 11.57 | -25006.83 | 14.05 | -24964.00 | 23.84 | -24923.80 | 31.00 |
| -25152.76 | 0.26  | -25115.05 | 4.94 | -25078.02 | 8.93  | -25039.20 | 14.72 | -25002.81 | 18.06 | -24968.05 | 19.79 | -24929.50 | 25.30 |
| -25153.43 | -0.40 | -25115.48 | 4.51 | -25076.95 | 10.00 | -25041.92 | 11.99 | -24999.46 | 21.42 | -24966.00 | 21.84 | -24930.83 | 23.97 |
| -25153.13 | -0.10 | -25115.82 | 4.17 | -25078.39 | 8.56  | -25040.39 | 13.53 | -25003.51 | 17.36 | -24965.88 | 21.96 | -24923.78 | 31.02 |
| -25152.88 | 0.14  | -25115.66 | 4.32 | -25079.13 | 7.82  | -25041.48 | 12.43 | -25002.63 | 18.24 | -24966.79 | 21.05 | -24929.27 | 25.53 |
| -25152.33 | 0.69  | -25116.55 | 3.43 | -25079.78 | 7.17  | -25041.82 | 12.09 | -25002.02 | 18.85 | -24968.05 | 19.79 | -24928.74 | 26.06 |
| -25153.08 | -0.06 | -25116.69 | 3.30 | -25076.48 | 10.47 | -25042.96 | 10.95 | -25003.90 | 16.98 | -24960.31 | 27.53 | -24921.65 | 33.16 |
| -25152.26 | 0.76  | -25116.27 | 3.71 | -25080.94 | 6.01  | -25041.77 | 12.14 | -25004.15 | 16.73 | -24964.59 | 23.25 | -24928.22 | 26.58 |
| -25152.42 | 0.60  | -25114.92 | 5.07 | -25078.07 | 8.88  | -25041.64 | 12.27 | -24998.60 | 22.28 | -24966.43 | 21.41 | -24928.33 | 26.47 |
| -25153.74 | -0.71 | -25114.17 | 5.82 | -25077.37 | 9.58  | -25041.77 | 12.15 | -25003.57 | 17.30 | -24964.78 | 23.06 | -24928.06 | 26.74 |
| -25153.88 | -0.86 | -25114.40 | 5.59 | -25079.66 | 7.29  | -25040.40 | 13.51 | -25005.11 | 15.76 | -24967.87 | 19.96 | -24930.37 | 24.43 |
| -25153.22 | -0.20 | -25116.65 | 3.34 | -25079.36 | 7.59  | -25041.31 | 12.60 | -25001.96 | 18.91 | -24965.57 | 22.26 | -24930.12 | 24.68 |
| -25153.63 | -0.61 | -25115.93 | 4.06 | -25079.30 | 7.65  | -25041.61 | 12.30 | -25005.36 | 15.52 | -24964.51 | 23.33 | -24929.06 | 25.74 |
| -25154.22 | -1.20 | -25115.85 | 4.14 | -25075.51 | 11.44 | -25038.24 | 15.67 | -25005.43 | 15.45 | -24961.28 | 26.56 | -24928.82 | 25.98 |
| -25153.60 | -0.57 | -25115.70 | 4.29 | -25078.09 | 8.86  | -25041.42 | 12.49 | -25000.70 | 20.17 | -24967.82 | 20.01 | -24929.90 | 24.90 |
| -25153.74 | -0.71 | -25115.01 | 4.97 | -25079.58 | 7.37  | -25036.23 | 17.68 | -25002.90 | 17.97 | -24967.55 | 20.29 | -24928.55 | 26.25 |
| -25153.53 | -0.51 | -25116.19 | 3.79 | -25076.38 | 10.57 | -25035.70 | 18.22 | -25003.39 | 17.49 | -24968.27 | 19.57 | -24922.97 | 31.83 |
| -25152.24 | 0.78  | -25115.79 | 4.19 | -25077.31 | 9.64  | -25042.66 | 11.25 | -25003.70 | 17.18 | -24966.64 | 21.19 | -24930.82 | 23.98 |
| -25151.40 | 1.62  | -25115.48 | 4.50 | -25080.08 | 6.87  | -25041.38 | 12.54 | -25002.27 | 18.61 | -24966.25 | 21.59 | -24927.47 | 27.33 |
| -25153.52 | -0.50 | -25116.17 | 3.82 | -25077.54 | 9.41  | -25041.81 | 12.10 | -25005.57 | 15.31 | -24967.88 | 19.96 | -24930.18 | 24.62 |

|           |       |           |      |           |       |           |       |           |       |           |       |           |       |
|-----------|-------|-----------|------|-----------|-------|-----------|-------|-----------|-------|-----------|-------|-----------|-------|
| -25153.10 | -0.07 | -25116.77 | 3.21 | -25077.59 | 9.36  | -25039.70 | 14.22 | -25005.19 | 15.69 | -24966.60 | 21.24 | -24927.87 | 26.93 |
| -25153.46 | -0.44 | -25116.26 | 3.73 | -25078.57 | 8.38  | -25042.57 | 11.34 | -25005.91 | 14.97 | -24965.25 | 22.59 | -24927.19 | 27.61 |
| -25154.63 | -1.61 | -25114.98 | 5.01 | -25079.47 | 7.48  | -25043.20 | 10.71 | -25004.96 | 15.91 | -24965.13 | 22.71 | -24929.04 | 25.76 |
| -25152.77 | 0.26  | -25116.35 | 3.64 | -25078.33 | 8.62  | -25038.57 | 15.35 | -25002.23 | 18.64 | -24965.63 | 22.20 | -24933.25 | 21.55 |
| -25154.23 | -1.21 | -25116.43 | 3.55 | -25080.96 | 5.99  | -25041.80 | 12.11 | -25003.40 | 17.48 | -24966.50 | 21.34 | -24929.70 | 25.10 |
| -25153.55 | -0.53 | -25115.21 | 4.78 | -25077.61 | 9.35  | -25039.47 | 14.44 | -25004.96 | 15.91 | -24969.84 | 18.00 | -24928.93 | 25.87 |
| -25153.26 | -0.24 | -25115.18 | 4.81 | -25078.28 | 8.67  | -25039.41 | 14.50 | -25002.31 | 18.57 | -24960.60 | 27.24 | -24932.77 | 22.03 |
| -25153.41 | -0.38 | -25117.19 | 2.79 | -25078.83 | 8.12  | -25041.70 | 12.21 | -25000.53 | 20.34 | -24967.05 | 20.79 | -24929.16 | 25.64 |
| -25153.31 | -0.29 | -25115.45 | 4.53 | -25077.91 | 9.04  | -25042.82 | 11.09 | -25003.55 | 17.33 | -24966.46 | 21.38 | -24932.18 | 22.62 |
| -25152.48 | 0.54  | -25113.90 | 6.09 | -25078.56 | 8.39  | -25044.66 | 9.25  | -25002.60 | 18.27 | -24958.21 | 29.62 | -24929.43 | 25.37 |
| -25153.82 | -0.80 | -25113.57 | 6.42 | -25078.52 | 8.43  | -25043.04 | 10.88 | -25005.11 | 15.77 | -24965.03 | 22.80 | -24931.56 | 23.24 |
| -25153.29 | -0.26 | -25114.69 | 5.30 | -25078.96 | 7.99  | -25037.79 | 16.12 | -25003.25 | 17.62 | -24967.49 | 20.35 | -24928.62 | 26.18 |
| -25153.76 | -0.73 | -25114.56 | 5.43 | -25078.28 | 8.67  | -25042.46 | 11.45 | -25002.41 | 18.47 | -24966.39 | 21.45 | -24929.70 | 25.10 |
| -25153.36 | -0.33 | -25116.58 | 3.40 | -25078.73 | 8.22  | -25041.97 | 11.94 | -25002.80 | 18.07 | -24966.36 | 21.48 | -24928.79 | 26.01 |
| -25152.97 | 0.05  | -25115.91 | 4.08 | -25081.05 | 5.90  | -25040.61 | 13.30 | -25000.09 | 20.78 | -24967.69 | 20.15 | -24926.36 | 28.45 |
| -25153.58 | -0.56 | -25114.73 | 5.25 | -25077.36 | 9.59  | -25036.93 | 16.98 | -25001.90 | 18.97 | -24965.62 | 22.22 | -24930.88 | 23.93 |
| -25152.96 | 0.07  | -25116.34 | 3.65 | -25079.55 | 7.40  | -25041.89 | 12.02 | -25006.63 | 14.25 | -24966.94 | 20.90 | -24926.38 | 28.42 |
| -25152.96 | 0.06  | -25114.13 | 5.86 | -25078.73 | 8.22  | -25037.55 | 16.37 | -25000.08 | 20.80 | -24968.13 | 19.71 | -24929.64 | 25.16 |
| -25152.65 | 0.38  | -25115.97 | 4.01 | -25079.63 | 7.32  | -25040.07 | 13.84 | -25001.71 | 19.17 | -24966.34 | 21.50 | -24932.18 | 22.63 |
| -25154.16 | -1.14 | -25116.07 | 3.92 | -25076.21 | 10.74 | -25044.20 | 9.72  | -24999.60 | 21.27 | -24966.03 | 21.81 | -24928.14 | 26.66 |
| -25152.71 | 0.32  | -25114.58 | 5.41 | -25077.01 | 9.94  | -25040.34 | 13.57 | -25003.79 | 17.09 | -24965.42 | 22.42 | -24927.93 | 26.87 |
| -25152.69 | 0.33  | -25114.57 | 5.42 | -25079.39 | 7.56  | -25042.64 | 11.27 | -25004.01 | 16.86 | -24968.90 | 18.94 | -24929.01 | 25.79 |
| -25152.40 | 0.63  | -25114.57 | 5.41 | -25078.37 | 8.58  | -25040.87 | 13.04 | -25005.44 | 15.44 | -24968.18 | 19.66 | -24931.86 | 22.94 |
| -25153.34 | -0.32 | -25117.21 | 2.78 | -25079.55 | 7.40  | -25038.72 | 15.19 | -25004.33 | 16.54 | -24959.59 | 28.25 | -24930.05 | 24.75 |
| -25152.45 | 0.57  | -25116.44 | 3.55 | -25077.00 | 9.95  | -25042.17 | 11.75 | -25005.19 | 15.69 | -24966.17 | 21.67 | -24929.17 | 25.63 |
| -25154.17 | -1.14 | -25118.05 | 1.94 | -25073.84 | 13.11 | -25043.14 | 10.78 | -25005.00 | 15.87 | -24965.30 | 22.54 | -24928.08 | 26.72 |
| -25152.83 | 0.19  | -25116.04 | 3.95 | -25079.49 | 7.46  | -25041.64 | 12.27 | -25003.91 | 16.97 | -24966.61 | 21.23 | -24925.72 | 29.08 |
| -25152.02 | 1.00  | -25117.37 | 2.62 | -25078.98 | 7.97  | -25042.35 | 11.56 | -25002.80 | 18.07 | -24966.16 | 21.68 | -24924.97 | 29.83 |
| -25153.97 | -0.95 | -25117.42 | 2.57 | -25079.63 | 7.32  | -25041.45 | 12.47 | -25001.56 | 19.31 | -24962.26 | 25.58 | -24922.08 | 32.72 |
| -25153.37 | -0.35 | -25117.03 | 2.96 | -25077.71 | 9.24  | -25039.01 | 14.91 | -25000.00 | 20.88 | -24967.90 | 19.94 | -24926.00 | 28.80 |
| -25151.66 | 1.37  | -25114.97 | 5.02 | -25077.11 | 9.84  | -25039.61 | 14.30 | -25003.83 | 17.04 | -24965.96 | 21.88 | -24930.57 | 24.23 |
| -25152.61 | 0.42  | -25116.52 | 3.47 | -25077.99 | 8.96  | -25042.64 | 11.27 | -25004.13 | 16.74 | -24967.02 | 20.81 | -24930.55 | 24.26 |
| -25153.25 | -0.22 | -25116.66 | 3.32 | -25078.85 | 8.10  | -25041.33 | 12.58 | -25004.76 | 16.12 | -24963.03 | 24.81 | -24932.22 | 22.58 |
| -25154.04 | -1.01 | -25114.79 | 5.20 | -25077.65 | 9.30  | -25042.04 | 11.87 | -25001.61 | 19.27 | -24962.22 | 25.62 | -24928.82 | 25.98 |
| -25154.21 | -1.19 | -25117.84 | 2.15 | -25080.67 | 6.28  | -25038.27 | 15.65 | -25004.23 | 16.64 | -24968.71 | 19.13 | -24931.92 | 22.89 |
| -25153.23 | -0.20 | -25116.81 | 3.17 | -25078.05 | 8.90  | -25041.59 | 12.33 | -25005.41 | 15.47 | -24965.89 | 21.95 | -24927.82 | 26.98 |
| -25152.76 | 0.26  | -25113.66 | 6.33 | -25076.06 | 10.89 | -25042.22 | 11.69 | -25002.73 | 18.14 | -24968.23 | 19.61 | -24927.79 | 27.01 |
| -25154.63 | -1.60 | -25116.02 | 3.97 | -25079.74 | 7.21  | -25044.22 | 9.69  | -25002.74 | 18.13 | -24967.80 | 20.04 | -24930.22 | 24.58 |
| -25152.65 | 0.37  | -25117.39 | 2.60 | -25079.72 | 7.23  | -25040.04 | 13.88 | -25003.45 | 17.43 | -24965.52 | 22.31 | -24930.23 | 24.57 |
| -25153.29 | -0.27 | -25114.20 | 5.79 | -25078.49 | 8.46  | -25041.13 | 12.78 | -25003.41 | 17.46 | -24967.13 | 20.71 | -24930.12 | 24.68 |
| -25154.37 | -1.35 | -25115.58 | 4.41 | -25080.06 | 6.89  | -25039.07 | 14.84 | -25000.47 | 20.41 | -24967.79 | 20.05 | -24927.64 | 27.16 |

|           |       |           |      |           |       |           |       |           |       |           |       |           |       |
|-----------|-------|-----------|------|-----------|-------|-----------|-------|-----------|-------|-----------|-------|-----------|-------|
| -25153.26 | -0.23 | -25114.46 | 5.53 | -25078.76 | 8.19  | -25040.70 | 13.21 | -25000.31 | 20.56 | -24967.95 | 19.89 | -24926.62 | 28.18 |
| -25153.11 | -0.09 | -25117.72 | 2.26 | -25076.50 | 10.45 | -25044.01 | 9.90  | -25006.25 | 14.62 | -24968.04 | 19.80 | -24928.67 | 26.13 |
| -25153.92 | -0.89 | -25116.74 | 3.24 | -25077.61 | 9.34  | -25040.53 | 13.38 | -25000.34 | 20.53 | -24966.43 | 21.40 | -24931.65 | 23.15 |
| -25153.95 | -0.92 | -25116.17 | 3.82 | -25073.21 | 13.74 | -25036.07 | 17.84 | -25006.17 | 14.71 | -24967.14 | 20.70 | -24927.60 | 27.20 |
| -25153.83 | -0.80 | -25116.73 | 3.26 | -25077.15 | 9.80  | -25041.14 | 12.77 | -25005.86 | 15.01 | -24967.57 | 20.27 | -24928.57 | 26.23 |
| -25154.10 | -1.07 | -25116.73 | 3.25 | -25079.50 | 7.45  | -25041.76 | 12.15 | -25005.58 | 15.30 | -24964.58 | 23.26 | -24928.80 | 26.00 |
| -25153.10 | -0.08 | -25113.69 | 6.29 | -25078.35 | 8.60  | -25041.04 | 12.88 | -25000.00 | 20.88 | -24965.15 | 22.69 | -24930.93 | 23.87 |
| -25153.72 | -0.70 | -25116.30 | 3.69 | -25075.29 | 11.66 | -25041.75 | 12.16 | -25001.60 | 19.27 | -24962.73 | 25.10 | -24931.49 | 23.31 |
| -25154.04 | -1.02 | -25116.19 | 3.80 | -25075.65 | 11.30 | -25041.38 | 12.53 | -25003.41 | 17.47 | -24966.59 | 21.24 | -24932.13 | 22.67 |
| -25154.62 | -1.59 | -25115.55 | 4.44 | -25076.01 | 10.94 | -25040.21 | 13.70 | -25001.58 | 19.30 | -24964.55 | 23.29 | -24928.20 | 26.61 |
| -25154.31 | -1.29 | -25114.97 | 5.01 | -25078.77 | 8.18  | -25041.73 | 12.18 | -25003.12 | 17.75 | -24966.99 | 20.85 | -24929.05 | 25.75 |
| -25150.58 | 2.44  | -25113.55 | 6.44 | -25076.84 | 10.11 | -25042.79 | 11.12 | -25003.44 | 17.43 | -24966.61 | 21.23 | -24926.46 | 28.34 |
| -25153.61 | -0.59 | -25116.65 | 3.34 | -25080.71 | 6.24  | -25042.07 | 11.84 | -25000.59 | 20.28 | -24963.66 | 24.18 | -24929.78 | 25.02 |
| -25154.73 | -1.71 | -25114.98 | 5.01 | -25079.08 | 7.87  | -25039.45 | 14.47 | -25002.02 | 18.85 | -24967.12 | 20.72 | -24929.29 | 25.51 |
| -25154.55 | -1.52 | -25115.40 | 4.59 | -25080.56 | 6.39  | -25040.40 | 13.51 | -25002.90 | 17.98 | -24966.26 | 21.58 | -24929.24 | 25.56 |
| -25153.67 | -0.65 | -25115.90 | 4.08 | -25077.21 | 9.74  | -25041.87 | 12.04 | -25005.24 | 15.64 | -24967.13 | 20.71 | -24934.39 | 20.42 |
| -25153.57 | -0.55 | -25115.84 | 4.15 | -25078.53 | 8.42  | -25044.49 | 9.42  | -25002.32 | 18.55 | -24965.81 | 22.03 | -24932.74 | 22.06 |
| -25154.36 | -1.33 |           |      | -25079.92 | 7.03  |           |       | -25000.99 | 19.88 |           |       | -24927.73 | 27.07 |
| -25154.45 | -1.42 |           |      |           |       |           |       | -24993.78 | 27.09 |           |       |           |       |
| -25152.96 | 0.06  |           |      |           |       |           |       | -25004.30 | 16.58 |           |       |           |       |

Average energies

|           |       |           |      |           |      |           |       |           |       |           |       |           |       |
|-----------|-------|-----------|------|-----------|------|-----------|-------|-----------|-------|-----------|-------|-----------|-------|
| -25153.38 | -0.36 | -25115.75 | 4.24 | -25078.17 | 8.78 | -25040.92 | 12.99 | -25003.20 | 17.67 | -24965.94 | 21.90 | -24928.88 | 25.92 |
|-----------|-------|-----------|------|-----------|------|-----------|-------|-----------|-------|-----------|-------|-----------|-------|

## U

concentration in solid solution (%)  
number of atoms

|           | ground<br>state<br>energy | solid<br>solution<br>energy |       |           |       |           |       |           |       |           |       |           |       |
|-----------|---------------------------|-----------------------------|-------|-----------|-------|-----------|-------|-----------|-------|-----------|-------|-----------|-------|
|           | 3                         | 6                           |       | 9         |       | 12        |       | 15        |       | 18        |       | 21        |       |
|           | 2                         | 4                           |       | 6         |       | 8         |       | 10        |       | 12        |       | 14        |       |
| -25157.61 | 0.43                      | -25124.24                   | 5.79  | -25093.63 | 8.37  | -25053.70 | 20.28 | -25030.65 | 15.32 | -24995.27 | 22.68 | -24963.06 | 26.88 |
| -25158.64 | -0.59                     | -25125.35                   | 4.68  | -25090.38 | 11.63 | -25061.51 | 12.48 | -25028.79 | 17.18 | -25000.52 | 17.43 | -24963.97 | 25.96 |
| -25157.72 | 0.32                      | -25126.55                   | 3.47  | -25092.51 | 9.50  | -25061.47 | 12.52 | -25029.46 | 16.51 | -24998.94 | 19.01 | -24963.50 | 26.43 |
| -25157.80 | 0.24                      | -25126.73                   | 3.29  | -25096.23 | 5.78  | -25061.21 | 12.78 | -25029.43 | 16.54 | -24992.21 | 25.74 | -24963.56 | 26.38 |
| -25157.72 | 0.32                      |                             |       | -25090.87 | 11.13 | -25063.02 | 10.96 | -25024.32 | 21.65 | -24997.42 | 20.53 | -24967.01 | 22.93 |
| -25156.42 | 1.62                      | -25126.07                   | 3.96  | -25091.61 | 10.39 | -25063.01 | 10.98 | -25028.76 | 17.21 | -25000.35 | 17.60 | -24964.90 | 25.03 |
| -25158.69 | -0.64                     | -25126.55                   | 3.47  | -25091.09 | 10.92 | -25061.09 | 12.89 | -25027.55 | 18.42 | -24997.88 | 20.08 | -24966.36 | 23.57 |
| -25157.79 | 0.26                      | -25124.60                   | 5.42  | -25091.07 | 10.94 | -25058.87 | 15.12 | -25030.36 | 15.61 | -24995.28 | 22.67 | -24966.89 | 23.05 |
| -25156.62 | 1.43                      | -25126.45                   | 3.57  | -25091.87 | 10.13 | -25063.84 | 10.15 | -25030.55 | 15.42 | -24994.50 | 23.45 | -24964.67 | 25.26 |
| -25157.69 | 0.35                      | -25126.97                   | 3.05  | -25090.38 | 11.62 | -25061.16 | 12.83 | -25032.65 | 13.32 | -24997.00 | 20.95 | -24969.54 | 20.39 |
| -25151.87 | 6.17                      | -25116.61                   | 13.41 | -25092.38 | 9.62  | -25062.58 | 11.41 | -25027.13 | 18.83 | -24999.53 | 18.42 | -24968.59 | 21.34 |
| -25158.48 | -0.44                     | -25126.19                   | 3.83  | -25093.02 | 8.98  | -25057.55 | 16.44 | -25027.80 | 18.17 | -24999.60 | 18.35 | -24962.68 | 27.25 |

|           |       |           |       |           |       |           |       |           |       |           |       |           |       |
|-----------|-------|-----------|-------|-----------|-------|-----------|-------|-----------|-------|-----------|-------|-----------|-------|
| -25157.93 | 0.11  | -25125.33 | 4.69  | -25093.28 | 8.73  | -25057.23 | 16.76 | -25031.70 | 14.27 | -24997.54 | 20.41 | -24962.91 | 27.03 |
| -25158.69 | -0.65 | -25124.05 | 5.98  | -25093.64 | 8.37  | -25059.64 | 14.34 | -25030.56 | 15.41 | -24996.79 | 21.17 | -24962.63 | 27.30 |
| -25159.26 | -1.22 | -25125.75 | 4.27  | -25092.30 | 9.71  | -25061.53 | 12.46 | -25029.88 | 16.09 | -24995.69 | 22.26 | -24965.49 | 24.44 |
| -25157.50 | 0.54  | -25125.39 | 4.64  | -25092.04 | 9.97  | -25060.96 | 13.02 | -25029.71 | 16.26 | -24994.17 | 23.78 | -24968.66 | 21.27 |
| -25158.82 | -0.77 | -25125.86 | 4.17  | -25093.01 | 9.00  | -25060.80 | 13.19 | -25028.40 | 17.57 | -24998.80 | 19.15 | -24963.40 | 26.53 |
| -25157.62 | 0.42  | -25121.62 | 8.41  | -25089.99 | 12.01 | -25059.17 | 14.82 | -25029.01 | 16.96 | -24996.78 | 21.18 | -24963.66 | 26.27 |
| -25157.09 | 0.95  | -25125.96 | 4.06  | -25091.82 | 10.18 | -25057.39 | 16.59 | -25029.79 | 16.18 | -24997.11 | 20.84 | -24966.34 | 23.59 |
| -25158.86 | -0.82 | -25124.69 | 5.33  | -25091.56 | 10.45 | -25060.24 | 13.75 | -25028.92 | 17.05 | -24996.91 | 21.04 | -24965.10 | 24.83 |
| -25157.73 | 0.31  | -25125.78 | 4.25  | -25093.37 | 8.64  | -25061.05 | 12.94 | -25029.35 | 16.62 | -24998.43 | 19.52 |           |       |
| -25157.51 | 0.53  | -25126.88 | 3.14  | -25092.74 | 9.27  | -25058.06 | 15.93 | -25023.72 | 22.25 | -24997.00 | 20.95 | -24964.79 | 25.14 |
| -25155.51 | 2.53  | -25123.49 | 6.53  | -25092.66 | 9.35  | -25061.58 | 12.41 | -25030.31 | 15.66 | -24998.90 | 19.05 | -24962.42 | 27.52 |
| -25157.10 | 0.94  | -25124.16 | 5.87  | -25092.44 | 9.56  | -25060.01 | 13.97 | -25029.96 | 16.01 | -24999.20 | 18.75 | -24961.36 | 28.57 |
| -25157.87 | 0.18  | -25125.87 | 4.16  | -25090.60 | 11.40 | -25058.40 | 15.59 | -25030.15 | 15.82 | -24997.63 | 20.32 | -24965.45 | 24.48 |
| -25158.77 | -0.73 | -25125.24 | 4.79  | -25093.07 | 8.94  | -25059.21 | 14.78 | -25028.00 | 17.97 | -24997.56 | 20.39 | -24966.19 | 23.75 |
| -25156.40 | 1.64  | -25122.94 | 7.09  | -25094.81 | 7.19  | -25060.46 | 13.53 | -25033.10 | 12.86 | -24997.98 | 19.98 | -24965.80 | 24.13 |
| -25152.13 | 5.91  | -25124.94 | 5.08  | -25094.16 | 7.85  | -25060.83 | 13.16 | -25027.94 | 18.03 | -24998.38 | 19.57 | -24963.07 | 26.86 |
| -25158.71 | -0.66 | -25123.62 | 6.41  | -25092.83 | 9.18  | -25061.65 | 12.34 | -25030.20 | 15.77 | -25000.87 | 17.08 | -24968.78 | 21.15 |
| -25151.49 | 6.56  | -25125.95 | 4.08  | -25094.42 | 7.59  | -25063.00 | 10.98 | -25031.81 | 14.16 | -24995.73 | 22.22 | -24966.47 | 23.46 |
| -25158.85 | -0.81 | -25127.08 | 2.95  | -25091.00 | 11.01 | -25061.52 | 12.47 | -25024.34 | 21.63 | -24997.04 | 20.91 | -24964.89 | 25.04 |
| -25158.18 | -0.14 | -25119.36 | 10.66 | -25095.15 | 6.86  | -25058.86 | 15.13 | -25027.89 | 18.08 | -24994.38 | 23.57 | -24964.56 | 25.37 |
| -25158.82 | -0.78 | -25126.19 | 3.83  | -25092.74 | 9.27  | -25060.91 | 13.08 | -25023.03 | 22.94 | -24997.25 | 20.70 | -24965.50 | 24.43 |
| -25156.82 | 1.22  | -25125.36 | 4.66  | -25093.04 | 8.97  | -25063.38 | 10.61 | -25024.38 | 21.59 | -24994.42 | 23.53 | -24966.96 | 22.98 |
| -25150.82 | 7.22  | -25127.01 | 3.02  | -25090.94 | 11.06 | -25063.38 | 10.61 | -25029.28 | 16.69 | -24997.63 | 20.32 | -24957.90 | 32.03 |
| -25150.25 | 7.79  | -25123.18 | 6.84  | -25093.10 | 8.91  | -25059.70 | 14.28 | -25030.82 | 15.15 | -24993.19 | 24.76 | -24952.61 | 37.32 |
| -25157.95 | 0.09  | -25126.35 | 3.68  | -25094.72 | 7.29  | -25059.28 | 14.71 | -25023.72 | 22.25 | -24996.64 | 21.31 | -24966.76 | 23.17 |
| -25158.20 | -0.16 | -25125.91 | 4.11  | -25093.16 | 8.85  | -25063.67 | 10.32 | -25026.53 | 19.44 | -24996.74 | 21.21 | -24964.20 | 25.73 |
| -25151.05 | 6.99  | -25123.71 | 6.32  | -25095.03 | 6.98  | -25058.10 | 15.88 | -25029.10 | 16.87 | -24998.26 | 19.69 | -24965.35 | 24.58 |
| -25158.84 | -0.80 | -25126.64 | 3.38  | -25090.85 | 11.16 | -25061.92 | 12.07 | -25027.51 | 18.46 | -24998.85 | 19.10 | -24963.15 | 26.78 |
| -25157.67 | 0.37  | -25123.85 | 6.18  | -25094.38 | 7.63  | -25061.81 | 12.18 | -25029.94 | 16.03 | -24995.97 | 21.98 | -24966.08 | 23.85 |
| -25151.38 | 6.66  | -25126.81 | 3.22  | -25095.09 | 6.91  | -25056.61 | 17.38 | -25030.11 | 15.86 | -24998.32 | 19.63 | -24963.58 | 26.36 |
| -25158.10 | -0.05 | -25126.73 | 3.30  | -25094.48 | 7.52  | -25058.43 | 15.56 | -25030.20 | 15.77 | -25000.43 | 17.52 | -24969.37 | 20.57 |
| -25156.98 | 1.06  | -25125.51 | 4.51  | -25091.79 | 10.22 | -25060.10 | 13.89 | -25030.21 | 15.76 | -24996.31 | 21.64 | -24968.29 | 21.65 |
| -25155.91 | 2.14  | -25123.84 | 6.18  | -25094.43 | 7.58  | -25061.45 | 12.54 | -25029.31 | 16.66 | -24996.27 | 21.68 | -24965.49 | 24.44 |
| -25157.55 | 0.49  | -25124.67 | 5.36  | -25094.68 | 7.32  | -25058.34 | 15.64 | -25029.47 | 16.50 | -24995.33 | 22.62 | -24964.50 | 25.44 |
| -25156.71 | 1.33  | -25126.08 | 3.95  | -25092.65 | 9.35  | -25062.06 | 11.92 | -25029.45 | 16.52 | -24994.27 | 23.68 | -24967.68 | 22.25 |
| -25157.98 | 0.06  | -25123.48 | 6.55  | -25091.86 | 10.15 | -25063.24 | 10.75 | -25029.69 | 16.28 | -24994.26 | 23.69 | -24963.33 | 26.60 |
| -25156.10 | 1.94  | -25126.67 | 3.35  | -25094.57 | 7.43  | -25060.20 | 13.78 | -25032.69 | 13.28 | -24995.91 | 22.04 | -24967.83 | 22.10 |
| -25158.30 | -0.26 | -25124.68 | 5.34  | -25090.76 | 11.25 | -25062.55 | 11.44 | -25024.83 | 21.13 | -24998.13 | 19.82 | -24966.64 | 23.30 |
| -25157.82 | 0.22  | -25119.71 | 10.32 | -25089.99 | 12.01 | -25057.11 | 16.87 | -25028.37 | 17.60 | -24999.94 | 18.01 | -24965.37 | 24.56 |
| -25158.45 | -0.41 | -25126.84 | 3.19  | -25093.39 | 8.62  | -25062.47 | 11.52 | -25030.67 | 15.30 | -24995.94 | 22.01 | -24968.03 | 21.90 |
| -25158.80 | -0.76 | -25125.82 | 4.21  | -25091.85 | 10.16 | -25060.89 | 13.10 | -25029.49 | 16.48 | -24993.65 | 24.30 | -24966.88 | 23.06 |



|                  |           |                |                |                |                 |                 |                 |       |
|------------------|-----------|----------------|----------------|----------------|-----------------|-----------------|-----------------|-------|
| Average energies | -25157.26 | 0.78 -25125.13 | 4.89 -25092.76 | 9.25 -25060.70 | 13.29 -25028.87 | 17.10 -24997.03 | 20.92 -24965.13 | 24.81 |
|------------------|-----------|----------------|----------------|----------------|-----------------|-----------------|-----------------|-------|

# Ca<sub>1-x</sub>M<sub>x</sub>ZrTi<sub>2-2x</sub>Al<sub>2x</sub>O<sub>7</sub> M=(Ce, Pu, Th, U)

## Ti(1)Ti(2)

N.B. All stated energies are in eV

| Ce                                  | ground | solid     |       |           |       |           |       |           |        |           |       |           |       |
|-------------------------------------|--------|-----------|-------|-----------|-------|-----------|-------|-----------|--------|-----------|-------|-----------|-------|
|                                     | state  | solution  |       |           |       |           |       |           |        |           |       |           |       |
|                                     | energy | energy    |       |           |       |           |       |           |        |           |       |           |       |
| concentration in solid solution (%) | 3      | 6         | 9     |           | 12    |           | 15    |           | 18     |           | 21    |           |       |
| number of atoms                     | 2      | 4         | 6     |           | 8     |           | 10    |           | 12     |           | 13    |           |       |
| -25155.94                           | -2.56  | -25122.29 | -1.59 | -25090.64 | -2.63 | -25048.09 | 7.25  | -25014.59 | 8.07   | -24975.73 | 14.24 | -24966.45 | 7.17  |
| -25157.73                           | -4.35  | -25122.52 | -1.82 | -25088.36 | -0.34 | -25050.89 | 4.45  | -25019.31 | 3.34   | -24986.68 | 3.29  | -24967.26 | 6.37  |
| -25156.60                           | -3.22  | -25123.79 | -3.09 | -25089.13 | -1.11 | -25053.25 | 2.08  | -25020.13 | 2.52   | -24985.29 | 4.68  | -24971.42 | 2.21  |
| -25154.28                           | -0.90  | -25123.52 | -2.82 | -25088.54 | -0.52 | -25047.98 | 7.35  | -25021.12 | 1.54   | -24982.56 | 7.41  | -24969.36 | 4.27  |
| -25157.85                           | -4.47  | -25121.25 | -0.55 | -25087.83 | 0.19  | -25055.07 | 0.27  | -25019.93 | 2.72   | -24988.21 | 1.76  | -24968.91 | 4.72  |
| -25156.72                           | -3.34  | -25119.46 | 1.23  | -25088.28 | -0.27 | -25054.58 | 0.75  | -25021.14 | 1.51   | -24984.82 | 5.15  | -24967.62 | 6.01  |
| -25156.45                           | -3.07  | -25122.40 | -1.70 | -25086.11 | 1.91  | -25051.98 | 3.35  | -25020.01 | 2.64   | -24980.82 | 9.15  | -24967.73 | 5.90  |
| -25157.50                           | -4.12  | -25122.48 | -1.78 | -25085.29 | 2.73  | -25052.42 | 2.92  | -25018.83 | 3.82   | -24984.33 | 5.64  | -24966.97 | 6.66  |
| -25156.32                           | -2.94  | -25120.83 | -0.14 | -25086.37 | 1.65  | -25056.89 | -1.56 | -25018.05 | 4.60   | -24984.51 | 5.46  | -24967.31 | 6.32  |
| -25156.90                           | -3.52  | -25121.70 | -1.00 | -25090.56 | -2.55 | -25053.73 | 1.61  | -25059.83 | -37.18 | -24985.19 | 4.78  | -24969.59 | 4.04  |
| -25157.56                           | -4.18  | -25120.91 | -0.21 | -25086.69 | 1.32  | -25053.41 | 1.92  | -25015.89 | 6.76   | -24985.38 | 4.59  | -24968.74 | 4.89  |
| -25156.60                           | -3.22  | -25120.75 | -0.05 | -25085.89 | 2.12  | -25054.78 | 0.55  | -25015.42 | 7.23   | -24986.62 | 3.35  | -24970.52 | 3.10  |
| -25156.41                           | -3.03  | -25123.07 | -2.37 | -25089.23 | -1.22 | -25054.32 | 1.01  | -25056.90 | -34.25 | -24983.84 | 6.13  | -24965.25 | 8.38  |
| -25158.28                           | -4.90  | -25121.78 | -1.09 | -25086.95 | 1.07  | -25052.15 | 3.19  | -25018.95 | 3.70   | -24988.99 | 0.98  | -24966.73 | 6.90  |
| -25155.64                           | -2.26  | -25123.55 | -2.85 | -25087.81 | 0.21  | -25054.47 | 0.86  | -25019.79 | 2.86   | -24984.38 | 5.59  | -24961.65 | 11.98 |
| -25157.62                           | -4.24  | -25122.91 | -2.21 | -25084.70 | 3.31  | -25055.74 | -0.41 | -25022.19 | 0.46   | -24982.58 | 7.39  | -24965.14 | 8.49  |
| -25156.04                           | -2.66  | -25120.53 | 0.16  | -25085.52 | 2.49  | -25048.34 | 6.99  | -25016.75 | 5.90   | -24983.56 | 6.41  | -24968.57 | 5.06  |
| -25157.36                           | -3.98  | -25121.47 | -0.77 | -25085.14 | 2.88  | -25051.56 | 3.77  | -25021.69 | 0.97   | -24987.22 | 2.75  | -24959.05 | 14.58 |
| -25158.77                           | -5.39  | -25122.86 | -2.16 | -25087.40 | 0.61  | -25055.02 | 0.32  | -25017.90 | 4.75   | -24987.16 | 2.81  | -24967.95 | 5.68  |
| -25157.46                           | -4.08  | -25122.71 | -2.01 | -25088.35 | -0.33 | -25053.50 | 1.83  | -25013.43 | 9.22   | -24986.98 | 2.99  | -24968.14 | 5.49  |
| -25157.13                           | -3.75  | -25121.19 | -0.49 | -25086.72 | 1.30  | -25055.64 | -0.31 | -25018.18 | 4.47   | -24984.02 | 5.95  | -24971.14 | 2.49  |
| -25157.71                           | -4.33  | -25122.38 | -1.68 | -25088.98 | -0.97 | -25052.86 | 2.48  | -25021.86 | 0.79   | -24984.59 | 5.38  | -24969.08 | 4.55  |
| -25156.16                           | -2.78  | -25121.04 | -0.34 | -25087.83 | 0.19  | -25054.18 | 1.16  | -25018.45 | 4.20   | -24985.22 | 4.75  | -24960.42 | 13.21 |
| -25157.46                           | -4.08  | -25121.16 | -0.46 | -25087.97 | 0.05  | -25049.57 | 5.76  | -25019.57 | 3.08   | -24982.09 | 7.88  | -24964.03 | 9.60  |
| -25157.40                           | -4.03  | -25122.61 | -1.91 | -25087.90 | 0.11  | -25050.54 | 4.79  | -25019.73 | 2.92   | -24985.78 | 4.19  | -24961.84 | 11.79 |
| -25157.09                           | -3.71  | -25123.53 | -2.83 | -25085.63 | 2.38  | -25053.37 | 1.97  | -25011.39 | 11.26  | -24987.66 | 2.31  | -24965.61 | 8.02  |
| -25158.03                           | -4.65  | -25123.19 | -2.50 | -25088.95 | -0.94 | -25050.31 | 5.02  | -25017.73 | 4.93   | -24986.01 | 3.96  | -24966.18 | 7.44  |
| -25156.54                           | -3.16  | -25122.48 | -1.78 | -25087.61 | 0.41  | -25051.02 | 4.32  | -25018.40 | 4.25   | -24983.02 | 6.95  | -24963.84 | 9.79  |
| -25156.84                           | -3.46  | -25120.82 | -0.12 | -25089.88 | -1.86 | -25055.46 | -0.13 | -25018.83 | 3.82   | -24984.03 | 5.94  | -24968.91 | 4.72  |

|           |       |           |       |           |       |           |       |           |       |           |       |           |       |
|-----------|-------|-----------|-------|-----------|-------|-----------|-------|-----------|-------|-----------|-------|-----------|-------|
| -25156.31 | -2.93 | -25118.98 | 1.72  | -25087.45 | 0.57  | -25055.96 | -0.63 | -25014.72 | 7.93  | -24982.87 | 7.10  | -24971.67 | 1.96  |
| -25158.10 | -4.72 | -25123.41 | -2.71 | -25089.22 | -1.20 | -25051.76 | 3.57  | -25018.81 | 3.84  | -24983.00 | 6.97  | -24969.03 | 4.60  |
| -25156.66 | -3.28 | -25121.69 | -1.00 | -25087.68 | 0.33  | -25055.71 | -0.38 | -25021.73 | 0.92  | -24974.22 | 15.75 | -24966.26 | 7.36  |
| -25156.38 | -3.00 | -25123.68 | -2.98 | -25087.78 | 0.24  | -25054.81 | 0.53  | -25017.30 | 5.35  | -24987.26 | 2.71  | -24961.31 | 12.32 |
| -25156.44 | -3.06 | -25122.52 | -1.83 | -25085.06 | 2.96  | -25052.96 | 2.38  | -25018.30 | 4.35  | -24981.65 | 8.32  | -24965.01 | 8.62  |
| -25157.66 | -4.28 | -25123.22 | -2.52 | -25088.27 | -0.25 | -25054.70 | 0.64  | -25022.58 | 0.08  | -24981.08 | 8.89  | -24970.34 | 3.28  |
| -25157.43 | -4.05 | -25122.45 | -1.75 | -25089.51 | -1.50 | -25054.97 | 0.36  | -25022.23 | 0.42  | -24984.89 | 5.08  | -24971.93 | 1.70  |
| -25155.98 | -2.60 | -25124.19 | -3.50 | -25087.04 | 0.97  | -25053.45 | 1.88  | -25020.95 | 1.70  | -24982.45 | 7.52  | -24964.59 | 9.03  |
| -25156.44 | -3.06 | -25123.55 | -2.86 | -25087.49 | 0.52  | -25055.12 | 0.21  | -25017.01 | 5.64  | -24983.84 | 6.13  | -24970.70 | 2.93  |
| -25157.39 | -4.01 | -25122.61 | -1.91 | -25087.54 | 0.48  | -25054.44 | 0.89  | -25017.07 | 5.58  | -24985.46 | 4.51  | -24965.60 | 8.03  |
| -25156.30 | -2.92 | -25121.71 | -1.02 | -25089.11 | -1.09 | -25055.31 | 0.02  | -25020.49 | 2.16  | -24986.23 | 3.74  | -24966.29 | 7.34  |
| -25156.89 | -3.51 | -25119.87 | 0.82  | -25087.98 | 0.03  | -25055.64 | -0.30 | -25020.24 | 2.41  | -24987.09 | 2.88  | -24962.93 | 10.70 |
| -25155.17 | -1.79 | -25122.62 | -1.92 | -25088.14 | -0.13 | -25055.13 | 0.20  | -25019.05 | 3.60  | -24985.05 | 4.92  | -24968.69 | 4.94  |
| -25157.93 | -4.55 | -25124.41 | -3.71 | -25090.40 | -2.38 | -25052.43 | 2.90  | -25018.68 | 3.97  | -24986.40 | 3.57  | -24963.42 | 10.21 |
| -25155.56 | -2.18 | -25121.95 | -1.25 | -25087.71 | 0.30  | -25053.07 | 2.26  | -25021.38 | 1.27  | -24980.28 | 9.69  | -24969.48 | 4.15  |
| -25157.24 | -3.86 | -25122.89 | -2.20 | -25085.20 | 2.82  | -25054.14 | 1.19  | -25021.50 | 1.15  | -24979.62 | 10.35 | -24965.33 | 8.30  |
| -25157.16 | -3.78 | -25121.85 | -1.15 | -25088.04 | -0.03 | -25054.32 | 1.01  | -25021.15 | 1.50  | -24988.14 | 1.83  | -24968.99 | 4.63  |
| -25156.71 | -3.33 | -25121.75 | -1.05 | -25087.82 | 0.20  | -25055.72 | -0.39 | -25020.06 | 2.59  | -24981.72 | 8.25  | -24967.03 | 6.60  |
| -25157.31 | -3.93 | -25122.40 | -1.70 | -25088.63 | -0.61 | -25056.59 | -1.26 | -25019.68 | 2.97  | -24986.74 | 3.23  | -24969.93 | 3.69  |
| -25157.18 | -3.80 | -25122.92 | -2.23 | -25088.21 | -0.19 | -25052.88 | 2.45  | -25020.85 | 1.80  | -24983.98 | 5.99  | -24967.54 | 6.09  |
| -25156.28 | -2.90 | -25123.87 | -3.17 | -25089.06 | -1.04 | -25056.33 | -1.00 | -25021.13 | 1.52  | -24988.66 | 1.31  | -24967.30 | 6.33  |
| -25155.79 | -2.41 | -25123.26 | -2.56 | -25087.59 | 0.43  | -25048.10 | 7.24  | -25020.72 | 1.93  | -24989.90 | 0.07  | -24969.76 | 3.87  |
| -25156.05 | -2.67 | -25122.03 | -1.34 | -25088.30 | -0.29 | -25055.65 | -0.32 | -25019.14 | 3.51  | -24980.74 | 9.23  | -24965.29 | 8.34  |
| -25157.02 | -3.64 | -25119.00 | 1.69  | -25089.99 | -1.97 | -25054.70 | 0.64  | -25020.56 | 2.09  | -24986.19 | 3.78  | -24967.39 | 6.24  |
| -25156.76 | -3.38 | -25120.64 | 0.06  | -25088.57 | -0.56 | -25048.51 | 6.83  | -25014.23 | 8.42  | -24984.14 | 5.83  | -24970.62 | 3.01  |
| -25157.07 | -3.69 | -25123.30 | -2.61 | -25089.35 | -1.34 | -25052.75 | 2.58  | -25021.15 | 1.50  | -24985.64 | 4.33  | -24970.68 | 2.95  |
| -25157.24 | -3.86 | -25123.45 | -2.75 | -25088.32 | -0.30 | -25052.93 | 2.40  | -25011.91 | 10.74 | -24986.20 | 3.77  | -24967.69 | 5.93  |
| -25157.87 | -4.49 | -25119.25 | 1.45  | -25088.86 | -0.84 | -25054.31 | 1.02  | -25018.82 | 3.83  | -24983.21 | 6.76  | -24965.61 | 8.02  |
| -25155.74 | -2.36 | -25121.29 | -0.59 | -25086.75 | 1.26  | -25053.51 | 1.82  | -25018.06 | 4.59  | -24987.60 | 2.37  | -24969.88 | 3.75  |
| -25156.67 | -3.29 | -25119.29 | 1.41  | -25077.79 | 10.22 | -25049.35 | 5.98  | -25020.04 | 2.61  | -24986.64 | 3.32  | -24966.20 | 7.43  |
| -25155.57 | -2.19 | -25121.72 | -1.02 | -25088.65 | -0.63 | -25052.39 | 2.94  | -25017.34 | 5.31  | -24985.15 | 4.82  | -24967.76 | 5.87  |
| -25157.23 | -3.85 | -25124.45 | -3.76 | -25088.71 | -0.69 | -25052.95 | 2.39  | -25018.22 | 4.43  | -24983.39 | 6.58  | -24970.60 | 3.03  |
| -25157.46 | -4.08 | -25121.85 | -1.15 | -25083.20 | 4.81  | -25055.25 | 0.08  | -25020.63 | 2.02  | -24987.39 | 2.58  | -24966.81 | 6.81  |
| -25157.23 | -3.85 | -25120.99 | -0.30 | -25087.90 | 0.12  | -25051.95 | 3.38  | -25020.30 | 2.35  | -24983.84 | 6.13  | -24967.00 | 6.63  |
| -25157.16 | -3.78 | -25122.67 | -1.97 | -25087.38 | 0.63  | -25053.65 | 1.68  | -25018.70 | 3.95  | -24985.11 | 4.86  | -24972.45 | 1.18  |
| -25156.92 | -3.54 | -25122.33 | -1.63 | -25089.29 | -1.27 | -25054.91 | 0.42  | -25020.21 | 2.44  | -24988.17 | 1.80  | -24966.54 | 7.09  |
| -25156.14 | -2.76 | -25122.16 | -1.46 | -25086.91 | 1.10  | -25054.19 | 1.14  | -25022.08 | 0.57  | -24984.07 | 5.90  | -24970.08 | 3.55  |
| -25156.56 | -3.18 | -25122.90 | -2.21 | -25087.36 | 0.66  | -25055.91 | -0.58 | -25020.27 | 2.38  | -24983.82 | 6.15  | -24962.30 | 11.33 |
| -25156.93 | -3.55 | -25122.64 | -1.95 | -25089.02 | -1.01 | -25053.31 | 2.02  | -25021.01 | 1.64  | -24979.81 | 10.15 | -24970.40 | 3.22  |
| -25156.93 | -3.55 | -25119.19 | 1.51  | -25089.35 | -1.33 | -25053.57 | 1.76  | -25017.29 | 5.36  | -24981.78 | 8.19  | -24970.30 | 3.33  |
| -25154.73 | -1.35 | -25122.61 | -1.91 | -25087.28 | 0.73  | -25053.02 | 2.31  | -25019.12 | 3.53  | -24988.41 | 1.56  | -24964.67 | 8.95  |



|           |       |           |       |           |       |           |       |           |       |           |        |           |       |
|-----------|-------|-----------|-------|-----------|-------|-----------|-------|-----------|-------|-----------|--------|-----------|-------|
| -25156.22 | -2.84 | -25122.25 | -1.55 | -25081.14 | 6.88  | -25055.76 | -0.43 | -25019.22 | 3.43  | -24986.16 | 3.81   | -24972.46 | 1.17  |
| -25157.96 | -4.59 | -25122.69 | -1.99 | -25086.64 | 1.37  | -25050.06 | 5.27  | -25022.64 | 0.02  | -24984.83 | 5.14   | -24968.64 | 4.99  |
| -25157.86 | -4.48 | -25122.97 | -2.27 | -25088.50 | -0.48 | -25052.66 | 2.67  | -25020.83 | 1.82  | -24983.64 | 6.33   | -24971.58 | 2.05  |
| -25157.97 | -4.59 | -25121.01 | -0.31 | -25087.24 | 0.77  | -25056.16 | -0.83 | -25017.85 | 4.80  | -24983.68 | 6.29   | -24971.70 | 1.93  |
| -25156.82 | -3.44 | -25119.87 | 0.83  | -25088.85 | -0.83 | -25053.63 | 1.70  | -25013.93 | 8.72  | -24987.75 | 2.21   | -24965.32 | 8.31  |
| -25156.84 | -3.46 | -25123.64 | -2.94 | -25088.77 | -0.75 | -25056.50 | -1.16 | -25020.68 | 1.98  | -24983.24 | 6.73   | -24967.13 | 6.50  |
| -25156.66 | -3.28 | -25121.77 | -1.08 | -25087.44 | 0.57  | -25051.81 | 3.53  | -25019.40 | 3.25  | -24981.38 | 8.59   | -24971.63 | 2.00  |
| -25157.98 | -4.60 | -25121.30 | -0.60 | -25085.96 | 2.06  | -25051.91 | 3.42  | -25018.30 | 4.35  | -24986.94 | 3.03   | -24971.54 | 2.09  |
| -25156.37 | -2.99 | -25122.28 | -1.58 | -25088.14 | -0.13 | -25053.64 | 1.70  | -25018.90 | 3.75  | -24983.64 | 6.33   | -24964.17 | 9.46  |
| -25157.64 | -4.26 | -25122.63 | -1.93 | -25089.07 | -1.06 | -25053.51 | 1.82  | -25020.50 | 2.15  | -24980.76 | 9.21   | -24966.16 | 7.47  |
| -25157.51 | -4.13 | -25123.40 | -2.71 | -25087.45 | 0.57  | -25054.56 | 0.77  | -25021.46 | 1.19  | -24987.21 | 2.76   | -24968.52 | 5.10  |
| -25157.46 | -4.08 | -25123.09 | -2.39 | -25088.46 | -0.44 | -25052.20 | 3.13  | -25019.61 | 3.04  | -24836.29 | 153.68 | -24967.05 | 6.58  |
| -25155.13 | -1.75 | -25121.09 | -0.40 | -25089.33 | -1.31 | -25053.89 | 1.44  | -25020.30 | 2.36  | -24982.07 | 7.90   | -24970.39 | 3.24  |
| -25157.73 | -4.35 | -25120.27 | 0.43  | -25088.99 | -0.98 | -25046.53 | 8.80  | -25012.34 | 10.31 | -24981.10 | 8.87   | -24971.10 | 2.52  |
| -25156.95 | -3.57 | -25123.12 | -2.42 | -25088.24 | -0.22 | -25055.96 | -0.62 | -25018.30 | 4.35  | -24982.57 | 7.40   | -24969.27 | 4.36  |
| -25157.23 | -3.85 | -25121.24 | -0.55 | -25085.41 | 2.61  | -25054.05 | 1.29  | -25020.35 | 2.30  | -24987.18 | 2.79   | -24969.01 | 4.62  |
| -25156.18 | -2.80 | -25119.42 | 1.28  | -25089.38 | -1.36 | -25054.96 | 0.38  | -25018.38 | 4.27  | -24986.71 | 3.26   | -24966.13 | 7.50  |
| -25155.93 | -2.55 | -25123.55 | -2.85 | -25089.39 | -1.37 | -25052.36 | 2.97  | -25017.12 | 5.54  | -24982.63 | 7.34   | -24968.71 | 4.91  |
| -25157.80 | -4.42 | -25121.96 | -1.26 | -25087.15 | 0.86  | -25052.30 | 3.03  | -25019.29 | 3.36  | -25028.47 | -38.50 | -24966.80 | 6.83  |
| -25157.01 | -3.63 | -25120.78 | -0.08 | -25087.37 | 0.65  | -25053.20 | 2.13  | -25021.38 | 1.27  | -24984.77 | 5.20   | -24966.01 | 7.62  |
| -25156.28 | -2.90 | -25122.49 | -1.79 | -25089.30 | -1.28 | -25055.86 | -0.53 | -25014.01 | 8.64  | -24981.60 | 8.37   | -24963.33 | 10.30 |
| -25155.85 | -2.47 | -25121.87 | -1.17 | -25088.93 | -0.91 | -25052.63 | 2.70  | -25021.03 | 1.62  | -24980.41 | 9.56   | -24968.29 | 5.34  |
| -25155.38 | -2.00 | -25120.10 | 0.60  | -25087.17 | 0.85  | -25053.78 | 1.56  | -25022.14 | 0.51  | -24986.93 | 3.04   | -24960.50 | 13.13 |
| -25155.59 | -2.21 | -25122.48 | -1.78 | -25084.53 | 3.49  | -25046.53 | 8.80  | -25019.96 | 2.69  | -24988.73 | 1.24   | -24965.21 | 8.42  |
| -25156.73 | -3.35 | -25124.13 | -3.43 | -25087.57 | 0.44  | -25056.19 | -0.86 | -25018.98 | 3.68  | -24983.39 | 6.58   | -24967.52 | 6.11  |
| -25156.73 | -3.36 | -25121.46 | -0.77 | -25088.60 | -0.58 | -25056.04 | -0.71 | -25017.97 | 4.68  | -24989.18 | 0.79   | -24966.77 | 6.86  |
| -25156.06 | -2.68 | -25123.20 | -2.50 | -25088.12 | -0.11 | -25053.54 | 1.79  | -25017.34 | 5.31  | -24988.33 | 1.64   | -24967.88 | 5.75  |
| -25156.94 | -3.57 | -25122.27 | -1.58 | -25087.26 | 0.75  | -25054.58 | 0.75  | -25021.29 | 1.36  | -24984.13 | 5.84   | -24970.88 | 2.75  |
| -25156.88 | -3.50 | -25121.93 | -1.23 | -25089.58 | -1.57 | -25054.54 | 0.79  | -25020.03 | 2.62  | -24987.57 | 2.40   | -24965.01 | 8.62  |
| -25157.25 | -3.87 | -25123.60 | -2.91 | -25086.44 | 1.57  | -25055.92 | -0.58 | -25013.42 | 9.24  | -24987.57 | 2.40   | -24970.41 | 3.22  |
| -25156.29 | -2.91 | -25121.85 | -1.15 | -25088.28 | -0.27 | -25054.18 | 1.15  | -25019.81 | 2.84  | -24981.85 | 8.12   | -24968.67 | 4.96  |
| -25156.44 | -3.06 | -25122.25 | -1.56 | -25086.93 | 1.09  | -25050.48 | 4.85  | -25020.27 | 2.38  | -24985.77 | 4.20   | -24963.67 | 9.96  |
| -25156.40 | -3.02 | -25122.22 | -1.53 | -25088.36 | -0.35 | -25052.39 | 2.94  | -25017.90 | 4.75  | -24982.67 | 7.30   | -24969.27 | 4.36  |
| -25156.70 | -3.32 | -25121.85 | -1.15 | -25089.50 | -1.49 | -25050.58 | 4.75  | -25021.38 | 1.27  | -24984.18 | 5.78   | -24970.14 | 3.49  |
| -25156.41 | -3.03 | -25121.51 | -0.81 | -25088.81 | -0.79 | -25054.60 | 0.73  | -25017.92 | 4.73  | -24987.73 | 2.24   | -24965.94 | 7.68  |
| -25156.80 | -3.43 | -25121.63 | -0.93 | -25090.01 | -1.99 | -25048.89 | 6.44  | -25016.37 | 6.28  | -24985.01 | 4.96   | -24970.22 | 3.41  |
| -25156.13 | -2.75 | -25123.13 | -2.43 | -25086.02 | 1.99  | -25051.90 | 3.43  | -25015.41 | 7.24  | -24984.96 | 5.01   | -24967.15 | 6.48  |
| -25157.91 | -4.53 | -25121.95 | -1.25 | -25087.19 | 0.82  | -25052.47 | 2.86  | -25016.70 | 5.95  | -24985.64 | 4.32   | -24969.54 | 4.09  |
| -25157.77 | -4.39 | -25121.32 | -0.63 | -25086.01 | 2.01  | -25051.58 | 3.75  | -25020.70 | 1.95  | -24983.78 | 6.19   | -24969.18 | 4.45  |
| -25155.57 | -2.19 | -25122.32 | -1.62 | -25088.50 | -0.48 | -25053.41 | 1.93  | -25008.92 | 13.73 | -24988.19 | 1.78   | -24966.03 | 7.59  |
| -25154.32 | -0.94 | -25123.67 | -2.98 | -25088.02 | 0.00  | -25054.60 | 0.73  | -25020.70 | 1.95  | -24987.45 | 2.52   | -24967.92 | 5.71  |

|           |       |           |       |           |       |           |       |           |      |           |      |           |       |
|-----------|-------|-----------|-------|-----------|-------|-----------|-------|-----------|------|-----------|------|-----------|-------|
| -25157.63 | -4.25 | -25122.71 | -2.01 | -25089.20 | -1.19 | -25050.70 | 4.63  | -25021.71 | 0.94 | -24982.67 | 7.30 | -24963.69 | 9.94  |
| -25158.78 | -5.40 | -25123.04 | -2.34 | -25085.66 | 2.35  | -25054.04 | 1.29  | -25022.39 | 0.26 | -24986.95 | 3.02 | -24959.68 | 13.94 |
| -25157.09 | -3.71 | -25124.53 | -3.83 | -25089.55 | -1.53 | -25055.58 | -0.25 | -25021.97 | 0.68 | -24986.18 | 3.79 | -24969.96 | 3.67  |
| -25157.24 | -3.86 | -25123.06 | -2.36 | -25089.60 | -1.59 | -25054.04 | 1.29  | -25022.05 | 0.60 | -24982.73 | 7.24 |           |       |
| -25157.17 | -3.79 | -25122.03 | -1.33 | -25087.66 | 0.36  | -25052.69 | 2.65  | -25014.08 | 8.57 | -24983.16 | 6.81 |           |       |
| -25157.04 | -3.66 | -25122.73 | -2.03 | -25086.66 | 1.35  |           |       | -25019.64 | 3.01 | -24980.15 | 9.82 |           |       |
| -25157.68 | -4.30 |           |       | -25089.48 | -1.46 |           |       |           |      | -24986.78 | 3.19 |           |       |
| -25155.46 | -2.08 |           |       |           |       |           |       |           |      |           |      |           |       |
| -25157.10 | -3.72 |           |       |           |       |           |       |           |      |           |      |           |       |

Average energies

|           |       |           |       |           |      |           |      |           |      |           |      |           |      |
|-----------|-------|-----------|-------|-----------|------|-----------|------|-----------|------|-----------|------|-----------|------|
| -25156.82 | -3.44 | -25122.14 | -1.44 | -25087.75 | 0.27 | -25053.32 | 2.02 | -25019.62 | 3.03 | -24983.76 | 6.21 | -24967.46 | 6.16 |
|-----------|-------|-----------|-------|-----------|------|-----------|------|-----------|------|-----------|------|-----------|------|

## Pu

ground state energy  
solid solution energy

concentration in solid solution (%)  
number of atoms

|           | 3     | 6         | 9     | 12        | 15    | 18        | 21    |           |       |           |       |           |       |
|-----------|-------|-----------|-------|-----------|-------|-----------|-------|-----------|-------|-----------|-------|-----------|-------|
|           | 2     | 4         | 6     | 8         | 10    | 12        | 13    |           |       |           |       |           |       |
| -25150.15 | -2.76 | -25110.06 | -1.34 | -25070.87 | -0.82 | -25028.39 | 3.00  | -24992.65 | 0.07  | -24954.29 | -0.23 | -24928.78 | 5.94  |
| -25150.21 | -2.82 | -25110.67 | -1.94 | -25070.43 | -0.37 | -25032.93 | -1.54 | -24991.18 | 1.54  | -24949.06 | 4.99  | -24930.40 | 4.32  |
| -25149.70 | -2.31 | -25111.47 | -2.74 | -25071.60 | -1.54 | -25033.32 | -1.93 | -24994.61 | -1.89 | -24951.55 | 2.50  | -24932.59 | 2.13  |
| -25152.44 | -5.05 | -25111.19 | -2.46 | -25069.83 | 0.23  | -25029.50 | 1.89  | -24991.49 | 1.23  | -24955.23 | -1.17 | -24926.95 | 7.77  |
| -25150.17 | -2.78 | -25110.21 | -1.48 | -25073.57 | -3.51 | -25033.32 | -1.93 | -24993.35 | -0.63 | -24953.56 | 0.50  | -24933.41 | 1.31  |
| -25149.43 | -2.04 | -25110.59 | -1.86 | -25073.44 | -3.38 | -25031.57 | -0.18 | -24992.18 | 0.55  | -24949.55 | 4.51  | -24935.42 | -0.70 |
| -25150.61 | -3.21 | -25110.81 | -2.09 | -25071.39 | -1.33 | -25029.24 | 2.15  | -24989.92 | 2.80  | -24949.57 | 4.49  | -24926.58 | 8.14  |
| -25151.09 | -3.70 | -25110.28 | -1.55 | -25071.75 | -1.69 | -25032.04 | -0.65 | -24993.28 | -0.55 | -24951.59 | 2.46  | -24934.02 | 0.70  |
| -25150.88 | -3.49 | -25113.10 | -4.38 | -25064.43 | 5.63  | -25034.01 | -2.62 | -24989.99 | 2.74  | -24955.01 | -0.95 | -24931.13 | 3.59  |
| -25150.06 | -2.66 | -25111.37 | -2.64 | -25074.60 | -4.54 | -25032.96 | -1.57 | -24992.72 | 0.00  | -24949.07 | 4.99  | -24930.77 | 3.95  |
| -25151.02 | -3.63 | -25112.61 | -3.88 | -25069.28 | 0.78  | -25030.96 | 0.43  | -24992.79 | -0.07 | -24952.18 | 1.88  | -24935.76 | -1.04 |
| -25150.50 | -3.10 | -25111.73 | -3.00 | -25071.11 | -1.05 | -25032.08 | -0.69 | -24988.15 | 4.57  | -24946.00 | 8.06  | -24932.22 | 2.50  |
| -25152.16 | -4.76 | -25111.16 | -2.43 | -25072.22 | -2.16 | -25030.73 | 0.66  | -24992.45 | 0.27  | -24951.07 | 2.99  | -24931.14 | 3.58  |
| -25152.82 | -5.43 | -25110.97 | -2.24 | -25070.66 | -0.60 | -25030.93 | 0.47  | -24991.62 | 1.11  | -24956.09 | -2.04 | -24930.63 | 4.09  |
| -25151.62 | -4.23 | -25110.56 | -1.84 | -25070.84 | -0.78 | -25033.33 | -1.94 | -24992.75 | -0.03 | -24951.04 | 3.02  | -24931.12 | 3.60  |
| -25151.06 | -3.67 | -25111.80 | -3.07 | -25070.45 | -0.39 | -25031.74 | -0.35 | -24991.57 | 1.16  | -24954.58 | -0.52 | -24934.55 | 0.17  |
| -25150.93 | -3.53 | -25111.80 | -3.08 | -25070.99 | -0.93 | -25029.89 | 1.50  | -24991.74 | 0.98  | -24949.19 | 4.86  | -24932.69 | 2.03  |
| -25151.33 | -3.94 | -25111.03 | -2.30 | -25072.00 | -1.94 | -25032.66 | -1.26 | -24987.80 | 4.93  | -24953.59 | 0.47  | -24932.90 | 1.83  |
| -25151.72 | -4.33 | -25108.04 | 0.68  | -25071.23 | -1.17 | -25032.40 | -1.01 | -24992.13 | 0.59  | -24952.67 | 1.39  | -24928.67 | 6.05  |
| -25151.01 | -3.62 | -25109.39 | -0.66 | -25071.37 | -1.31 | -25032.40 | -1.01 | -24993.74 | -1.02 | -24949.92 | 4.13  | -24935.85 | -1.13 |
| -25151.29 | -3.90 | -25111.75 | -3.02 | -25069.39 | 0.67  | -25031.53 | -0.14 | -24993.02 | -0.30 | -24951.60 | 2.46  | -24933.06 | 1.66  |
| -25151.93 | -4.53 | -25111.81 | -3.09 | -25072.10 | -2.04 | -25032.66 | -1.27 | -24992.53 | 0.19  | -24953.01 | 1.04  | -24931.45 | 3.27  |
| -25152.81 | -5.42 | -25111.54 | -2.82 | -25072.06 | -2.00 | -25032.05 | -0.66 | -24989.96 | 2.76  | -24950.39 | 3.67  | -24930.33 | 4.39  |

|           |       |           |       |           |       |           |       |           |       |           |        |           |       |
|-----------|-------|-----------|-------|-----------|-------|-----------|-------|-----------|-------|-----------|--------|-----------|-------|
| -25151.74 | -4.35 | -25111.11 | -2.39 | -25068.27 | 1.79  | -25033.17 | -1.78 | -24990.12 | 2.60  | -24952.01 | 2.05   | -24925.96 | 8.76  |
| -25151.01 | -3.61 | -25109.39 | -0.66 | -25069.50 | 0.56  | -25024.69 | 6.70  | -24990.53 | 2.19  | -24945.26 | 8.80   | -24928.93 | 5.79  |
| -25151.03 | -3.64 | -25109.37 | -0.64 | -25070.23 | -0.17 | -25032.97 | -1.57 | -24993.28 | -0.56 | -24950.94 | 3.11   | -24922.92 | 11.80 |
| -25151.64 | -4.25 | -25112.06 | -3.34 | -25072.49 | -2.43 | -25030.56 | 0.83  | -24989.71 | 3.01  | -24953.33 | 0.73   | -24934.84 | -0.12 |
| -25150.10 | -2.71 | -25110.59 | -1.86 | -25070.88 | -0.82 | -25032.27 | -0.88 | -24991.19 | 1.53  | -24952.17 | 1.89   | -24932.83 | 1.89  |
| -25150.49 | -3.10 | -25107.16 | 1.57  | -25072.92 | -2.86 | -25032.63 | -1.24 | -24987.71 | 5.01  | -24945.46 | 8.60   | -24925.21 | 9.51  |
| -25151.76 | -4.37 | -25111.91 | -3.18 | -25070.64 | -0.58 | -25034.16 | -2.77 | -24994.47 | -1.74 | -24953.10 | 0.96   | -24932.18 | 2.55  |
| -25151.11 | -3.72 | -25110.58 | -1.85 | -25069.06 | 1.00  | -25031.38 | 0.01  | -24991.69 | 1.03  | -24945.80 | 8.25   | -24933.07 | 1.65  |
| -25151.32 | -3.93 | -25112.65 | -3.92 | -25071.57 | -1.51 | -25031.96 | -0.57 | -24991.55 | 1.18  | -24947.36 | 6.70   | -24927.63 | 7.09  |
| -25152.28 | -4.89 | -25110.54 | -1.81 | -25072.85 | -2.79 | -25029.23 | 2.16  | -24989.18 | 3.54  | -24952.84 | 1.21   | -24932.18 | 2.54  |
| -25150.58 | -3.18 | -25112.07 | -3.34 | -25068.96 | 1.10  | -25031.18 | 0.21  | -24994.08 | -1.36 | -24980.70 | -26.64 | -24930.96 | 3.76  |
| -25152.33 | -4.94 | -25111.50 | -2.78 | -25073.30 | -3.24 | -25030.57 | 0.82  | -24992.33 | 0.40  | -24949.04 | 5.02   | -24929.83 | 4.89  |
| -25151.99 | -4.60 | -25108.90 | -0.17 | -25072.71 | -2.65 | -25033.84 | -2.45 | -24986.65 | 6.08  | -24953.88 | 0.18   | -24932.37 | 2.35  |
| -25151.24 | -3.85 | -25111.25 | -2.53 | -25069.80 | 0.26  | -25028.64 | 2.75  | -24993.41 | -0.69 | -24951.46 | 2.60   | -24934.61 | 0.11  |
| -25151.32 | -3.92 | -25112.04 | -3.32 | -25067.47 | 2.59  | -25034.54 | -3.15 | -24984.10 | 8.63  | -24952.42 | 1.63   | -24927.83 | 6.90  |
| -25151.75 | -4.36 | -25112.39 | -3.67 | -25069.56 | 0.50  | -25032.52 | -1.13 | -24992.91 | -0.19 | -24951.75 | 2.31   | -24934.82 | -0.10 |
| -25150.80 | -3.40 | -25111.48 | -2.75 | -25067.78 | 2.28  | -25030.90 | 0.49  | -24990.04 | 2.69  | -24953.57 | 0.48   | -24933.36 | 1.37  |
| -25151.72 | -4.32 | -25111.08 | -2.35 | -25070.53 | -0.48 | -25031.02 | 0.37  | -24991.67 | 1.05  | -24952.48 | 1.58   | -24933.77 | 0.95  |
| -25150.62 | -3.23 | -25110.98 | -2.25 | -25070.88 | -0.83 | -25031.33 | 0.06  | -24990.83 | 1.90  | -24954.91 | -0.85  | -24933.38 | 1.34  |
| -25151.28 | -3.88 | -25111.66 | -2.93 | -25071.89 | -1.83 | -25034.26 | -2.87 | -24991.33 | 1.39  | -24951.91 | 2.14   | -24931.52 | 3.20  |
| -25151.59 | -4.20 | -25108.37 | 0.36  | -25070.74 | -0.68 | -25033.19 | -1.80 | -24991.85 | 0.87  | -24953.37 | 0.69   | -24935.47 | -0.75 |
| -25150.86 | -3.46 | -25109.26 | -0.53 | -25071.41 | -1.35 | -25033.18 | -1.79 | -24989.27 | 3.45  | -24947.57 | 6.49   | -24932.83 | 1.89  |
| -25151.84 | -4.44 | -25109.00 | -0.27 | -25070.88 | -0.82 | -25030.91 | 0.49  | -24991.69 | 1.04  | -24947.83 | 6.23   | -24933.91 | 0.81  |
| -25152.15 | -4.75 | -25111.34 | -2.61 | -25069.58 | 0.48  | -25032.32 | -0.93 | -24992.79 | -0.07 | -24951.71 | 2.35   | -24936.95 | -2.23 |
| -25151.40 | -4.00 | -25110.54 | -1.82 | -25070.33 | -0.27 | -25032.13 | -0.74 | -24993.05 | -0.33 | -24955.13 | -1.07  | -24929.55 | 5.17  |
| -25151.16 | -3.76 | -25110.71 | -1.98 | -25070.70 | -0.64 | -25031.09 | 0.30  | -24989.91 | 2.82  | -24948.43 | 5.63   | -24932.94 | 1.78  |
| -25151.44 | -4.05 | -25112.32 | -3.60 | -25071.24 | -1.18 | -25029.00 | 2.39  | -24990.82 | 1.91  | -24952.63 | 1.42   | -24935.24 | -0.52 |
| -25150.87 | -3.48 | -25111.17 | -2.44 | -25072.45 | -2.39 | -25031.15 | 0.24  | -24991.99 | 0.73  | -24951.48 | 2.58   | -24934.18 | 0.54  |
| -25150.34 | -2.95 | -25112.29 | -3.57 | -25070.20 | -0.14 | -25032.76 | -1.37 | -24991.18 | 1.54  | -24948.99 | 5.06   | -24931.32 | 3.40  |
| -25150.81 | -3.42 | -25110.02 | -1.30 | -25069.40 | 0.66  | -25029.17 | 2.22  | -24991.05 | 1.67  | -24953.35 | 0.71   | -24934.57 | 0.15  |
| -25151.14 | -3.74 | -25110.19 | -1.46 | -25071.42 | -1.36 | -25032.41 | -1.02 | -24991.78 | 0.94  | -24950.41 | 3.65   | -24930.72 | 4.00  |
| -25149.47 | -2.07 | -25112.35 | -3.63 | -25071.41 | -1.35 | -25031.37 | 0.02  | -24991.38 | 1.34  | -24955.21 | -1.15  | -24933.26 | 1.47  |
| -25151.22 | -3.82 | -25106.92 | 1.80  | -25070.30 | -0.24 | -25031.49 | -0.09 | -24993.61 | -0.89 | -24951.36 | 2.69   | -24932.25 | 2.47  |
| -25151.39 | -4.00 | -25109.40 | -0.68 | -25070.97 | -0.91 | -25030.91 | 0.48  | -24991.85 | 0.88  | -24954.48 | -0.43  | -24934.96 | -0.23 |
| -25151.06 | -3.67 | -25110.51 | -1.78 | -25070.14 | -0.08 | -25026.75 | 4.64  | -24991.06 | 1.66  | -24954.97 | -0.91  | -24933.11 | 1.62  |
| -25150.96 | -3.57 | -25109.16 | -0.43 | -25071.90 | -1.84 | -25030.94 | 0.45  | -24993.25 | -0.53 | -24953.39 | 0.66   | -24933.30 | 1.43  |
| -25150.47 | -3.08 | -25111.77 | -3.04 | -25071.00 | -0.94 | -25032.12 | -0.73 | -24989.39 | 3.34  | -24955.19 | -1.13  | -24930.91 | 3.81  |
| -25150.76 | -3.36 | -25111.54 | -2.81 | -25070.67 | -0.61 | -25029.60 | 1.80  | -24992.07 | 0.65  | -24955.41 | -1.35  | -24932.17 | 2.55  |
| -25151.25 | -3.85 | -25109.34 | -0.62 | -25071.01 | -0.95 | -25031.98 | -0.59 | -24994.09 | -1.36 | -24950.68 | 3.37   | -24932.26 | 2.46  |
| -25150.45 | -3.06 | -25107.80 | 0.93  | -25071.12 | -1.06 | -25030.32 | 1.08  | -24989.54 | 3.18  | -24949.61 | 4.44   | -24926.06 | 8.66  |
| -25151.28 | -3.88 | -25111.54 | -2.81 | -25068.84 | 1.22  | -25028.78 | 2.61  | -24992.18 | 0.54  | -24951.31 | 2.74   | -24932.76 | 1.96  |

|           |       |           |       |           |       |           |       |           |       |           |        |           |       |
|-----------|-------|-----------|-------|-----------|-------|-----------|-------|-----------|-------|-----------|--------|-----------|-------|
| -25151.64 | -4.25 | -25112.01 | -3.28 | -25070.72 | -0.66 | -25032.77 | -1.38 | -24990.85 | 1.88  | -24950.43 | 3.62   | -24923.88 | 10.84 |
| -25152.87 | -5.47 | -25110.03 | -1.30 | -25067.56 | 2.50  | -25032.63 | -1.24 | -24989.62 | 3.10  | -24951.42 | 2.63   | -24934.84 | -0.12 |
| -25149.88 | -2.49 | -25110.82 | -2.09 | -25071.65 | -1.59 | -25030.26 | 1.13  | -24989.44 | 3.29  | -24949.79 | 4.27   | -24931.69 | 3.03  |
| -25150.04 | -2.64 | -25110.95 | -2.23 | -25070.59 | -0.53 | -25033.75 | -2.35 | -24989.09 | 3.64  | -24955.88 | -1.83  | -24935.54 | -0.82 |
| -25151.12 | -3.73 | -25110.85 | -2.13 | -25071.83 | -1.77 | -25031.80 | -0.41 | -24989.45 | 3.27  | -24952.85 | 1.20   | -24934.62 | 0.11  |
| -25149.68 | -2.28 | -25111.67 | -2.95 | -25072.10 | -2.04 | -25031.05 | 0.35  | -24991.79 | 0.93  | -24989.39 | -35.33 | -24928.34 | 6.38  |
| -25151.06 | -3.67 | -25109.33 | -0.60 | -25069.79 | 0.27  | -25031.78 | -0.39 | -24992.85 | -0.13 | -24950.19 | 3.86   | -24935.12 | -0.40 |
| -25150.26 | -2.86 | -25112.04 | -3.31 | -25073.71 | -3.65 | -25033.26 | -1.87 | -24993.41 | -0.68 | -24948.52 | 5.54   | -24935.69 | -0.97 |
| -25152.02 | -4.62 | -25106.21 | 2.52  | -25071.47 | -1.41 | -25032.70 | -1.30 | -24994.10 | -1.37 | -24951.10 | 2.95   | -24930.85 | 3.87  |
| -25151.75 | -4.35 | -25110.86 | -2.13 | -25069.07 | 0.98  | -25032.11 | -0.72 | -24987.82 | 4.91  | -24953.54 | 0.52   | -24925.80 | 8.92  |
| -25151.14 | -3.75 | -25112.47 | -3.74 | -25071.10 | -1.04 | -25030.25 | 1.14  | -24988.88 | 3.84  | -24948.36 | 5.70   | -24933.01 | 1.71  |
| -25149.13 | -1.74 | -25111.62 | -2.89 | -25071.82 | -1.76 | -25029.74 | 1.65  | -24991.33 | 1.39  | -24949.92 | 4.13   | -24931.97 | 2.75  |
| -25152.28 | -4.89 | -25110.70 | -1.98 | -25070.97 | -0.91 | -25030.70 | 0.69  | -24990.19 | 2.54  | -24950.87 | 3.18   | -24934.93 | -0.21 |
| -25151.91 | -4.51 | -25110.47 | -1.74 | -25070.43 | -0.37 | -25031.24 | 0.15  | -24984.83 | 7.89  | -24952.34 | 1.72   | -24934.91 | -0.19 |
| -25150.37 | -2.97 | -25109.12 | -0.39 | -25070.13 | -0.07 | -25031.40 | -0.01 | -24992.55 | 0.18  | -24946.63 | 7.42   | -24931.61 | 3.12  |
| -25151.85 | -4.45 | -25112.01 | -3.28 | -25070.21 | -0.15 | -25030.28 | 1.11  | -24993.63 | -0.91 | -24948.21 | 5.85   | -24925.24 | 9.48  |
| -25151.11 | -3.72 | -25112.07 | -3.34 | -25068.47 | 1.59  | -25030.74 | 0.65  | -24993.81 | -1.09 | -24951.65 | 2.41   | -24930.93 | 3.79  |
| -25151.80 | -4.40 | -25110.89 | -2.16 | -25071.81 | -1.75 | -25031.16 | 0.23  | -24992.40 | 0.32  | -24952.48 | 1.57   | -24930.28 | 4.44  |
| -25150.69 | -3.30 | -25110.53 | -1.80 | -25070.47 | -0.41 | -25030.52 | 0.87  | -24994.35 | -1.63 | -24952.20 | 1.85   | -24935.49 | -0.77 |
| -25151.13 | -3.73 | -25110.66 | -1.93 | -25071.29 | -1.23 | -25029.61 | 1.78  | -24993.36 | -0.64 | -24955.49 | -1.43  | -24930.53 | 4.19  |
| -25152.39 | -5.00 | -25112.95 | -4.22 | -25071.65 | -1.59 | -25028.54 | 2.85  | -24990.92 | 1.81  | -24948.82 | 5.24   | -24934.55 | 0.17  |
| -25151.02 | -3.63 | -25112.03 | -3.30 | -25071.20 | -1.15 | -25030.75 | 0.64  | -24989.67 | 3.05  | -24952.79 | 1.27   | -24930.71 | 4.01  |
| -25151.03 | -3.63 | -25110.40 | -1.67 | -25070.94 | -0.88 | -25031.33 | 0.06  | -24989.19 | 3.54  | -24949.87 | 4.19   | -24931.38 | 3.34  |
| -25150.73 | -3.34 | -25110.58 | -1.85 | -25070.84 | -0.78 | -25031.49 | -0.10 | -24994.10 | -1.38 | -24950.08 | 3.98   | -24934.87 | -0.15 |
| -25151.11 | -3.72 | -25111.74 | -3.01 | -25071.44 | -1.38 | -25031.13 | 0.26  | -24990.38 | 2.34  | -24946.54 | 7.51   | -24934.23 | 0.49  |
| -25151.40 | -4.00 | -25110.63 | -1.90 | -25071.39 | -1.33 | -25028.89 | 2.50  | -24994.33 | -1.60 | -24950.61 | 3.45   | -24932.32 | 2.40  |
| -25150.54 | -3.15 | -25110.74 | -2.02 | -25070.23 | -0.17 | -25031.94 | -0.55 | -24994.71 | -1.99 | -24948.40 | 5.65   | -24935.19 | -0.46 |
| -25149.94 | -2.55 | -25111.80 | -3.07 | -25069.63 | 0.43  | -25032.03 | -0.64 | -24992.79 | -0.06 | -24952.98 | 1.07   | -24930.45 | 4.27  |
| -25149.61 | -2.22 | -25111.17 | -2.44 | -25071.67 | -1.61 | -25027.14 | 4.25  | -24993.36 | -0.64 | -24952.73 | 1.33   | -24930.19 | 4.53  |
| -25151.80 | -4.40 | -25109.37 | -0.65 | -25069.76 | 0.30  | -25026.02 | 5.38  | -24991.95 | 0.78  | -24953.68 | 0.37   | -24932.26 | 2.46  |
| -25151.26 | -3.87 | -25112.22 | -3.49 | -25069.89 | 0.17  | -25028.30 | 3.09  | -24992.12 | 0.60  | -24952.53 | 1.52   | -24929.12 | 5.60  |
| -25151.49 | -4.10 | -25111.22 | -2.50 | -25072.48 | -2.42 | -25033.42 | -2.03 | -24988.89 | 3.83  | -24955.18 | -1.12  | -24927.37 | 7.35  |
| -25151.15 | -3.76 | -25112.98 | -4.26 | -25070.25 | -0.19 | -25031.58 | -0.19 | -24990.35 | 2.37  | -24952.22 | 1.84   | -24932.41 | 2.31  |
| -25150.78 | -3.38 | -25111.27 | -2.54 | -25071.98 | -1.92 | -25030.02 | 1.37  | -24987.66 | 5.06  | -24951.65 | 2.40   | -24931.35 | 3.38  |
| -25150.67 | -3.28 | -25111.31 | -2.58 | -25072.00 | -1.94 | -25029.53 | 1.86  | -24991.49 | 1.24  | -24949.14 | 4.92   | -24930.11 | 4.62  |
| -25150.40 | -3.00 | -25110.56 | -1.84 | -25070.90 | -0.84 | -25028.44 | 2.95  | -24991.45 | 1.28  | -24951.22 | 2.84   | -24929.32 | 5.40  |
| -25150.32 | -2.92 | -25110.96 | -2.24 | -25069.81 | 0.25  | -25029.24 | 2.15  | -24986.37 | 6.35  | -24953.83 | 0.23   | -24935.01 | -0.29 |
| -25152.09 | -4.70 | -25081.24 | 27.49 | -25070.54 | -0.49 | -25032.54 | -1.15 | -24992.23 | 0.50  | -24949.78 | 4.27   | -24934.72 | 0.00  |
| -25153.37 | -5.97 | -25110.28 | -1.56 | -25070.16 | -0.10 | -25032.35 | -0.96 | -24991.31 | 1.41  | -24951.77 | 2.28   | -24933.83 | 0.89  |
| -25150.27 | -2.88 | -25111.12 | -2.39 | -25071.09 | -1.03 | -25033.59 | -2.19 | -24991.00 | 1.72  | -24951.59 | 2.47   | -24931.85 | 2.87  |
| -25150.51 | -3.12 | -25110.84 | -2.11 | -25071.16 | -1.10 | -25031.25 | 0.14  | -24987.77 | 4.95  | -24954.10 | -0.05  | -24932.38 | 2.34  |

|           |       |           |       |           |       |           |       |           |       |           |       |           |       |
|-----------|-------|-----------|-------|-----------|-------|-----------|-------|-----------|-------|-----------|-------|-----------|-------|
| -25151.31 | -3.92 | -25111.27 | -2.54 | -25071.99 | -1.93 | -25026.08 | 5.32  | -24992.99 | -0.26 | -24950.69 | 3.37  | -24931.13 | 3.60  |
| -25150.80 | -3.41 | -25111.08 | -2.35 | -25071.19 | -1.13 | -25028.83 | 2.56  | -24991.45 | 1.28  | -24947.64 | 6.42  | -24934.76 | -0.04 |
| -25151.25 | -3.86 | -25110.40 | -1.67 | -25072.98 | -2.92 | -25029.22 | 2.17  | -24991.19 | 1.53  | -24950.78 | 3.28  | -24935.65 | -0.93 |
| -25150.67 | -3.28 | -25110.52 | -1.79 | -25070.17 | -0.11 | -25032.70 | -1.31 | -24984.30 | 8.42  | -24951.95 | 2.10  | -24929.30 | 5.42  |
| -25152.00 | -4.60 | -25109.94 | -1.21 | -25070.31 | -0.25 | -25029.83 | 1.56  | -24986.95 | 5.77  | -24952.62 | 1.44  | -24933.14 | 1.58  |
| -25150.89 | -3.50 | -25110.52 | -1.79 | -25071.37 | -1.31 | -25031.61 | -0.21 | -24991.81 | 0.91  | -24949.35 | 4.70  | -24929.58 | 5.15  |
| -25151.19 | -3.79 | -25106.77 | 1.95  | -25070.71 | -0.65 | -25030.90 | 0.49  | -24994.16 | -1.43 | -24950.01 | 4.05  | -24929.71 | 5.01  |
| -25151.80 | -4.41 | -25109.35 | -0.63 | -25070.42 | -0.36 | -25028.16 | 3.23  | -24991.99 | 0.73  | -24953.74 | 0.32  | -24930.39 | 4.33  |
| -25152.04 | -4.65 | -25110.65 | -1.93 | -25071.81 | -1.75 | -25032.35 | -0.96 | -24991.44 | 1.29  | -24955.93 | -1.87 |           |       |
| -25150.27 | -2.87 |           |       | -25071.96 | -1.90 | -25028.64 | 2.76  | -24988.82 | 3.90  |           |       |           |       |
| -25151.01 | -3.62 |           |       | -25070.51 | -0.45 |           |       | -24990.74 | 1.99  |           |       |           |       |
| -25150.62 | -3.22 |           |       | -25071.35 | -1.29 |           |       | -24990.52 | 2.20  |           |       |           |       |
| -25151.14 | -3.74 |           |       | -25072.58 | -2.52 |           |       |           |       |           |       |           |       |
| -25151.59 | -4.20 |           |       | -25038.23 | 31.82 |           |       |           |       |           |       |           |       |
| -25151.34 | -3.94 |           |       |           |       |           |       |           |       |           |       |           |       |

Average energies

|           |       |           |       |           |       |           |      |           |      |           |      |           |      |
|-----------|-------|-----------|-------|-----------|-------|-----------|------|-----------|------|-----------|------|-----------|------|
| -25151.12 | -3.73 | -25110.52 | -1.79 | -25070.61 | -0.55 | -25031.13 | 0.26 | -24991.23 | 1.49 | -24952.07 | 1.98 | -24931.86 | 2.86 |
|-----------|-------|-----------|-------|-----------|-------|-----------|------|-----------|------|-----------|------|-----------|------|

ground state energy      solid solution energy

Th

concentration in solid solution (%)

number of atoms

|          | 3        | 6        | 9        | 12       | 15       | 18       | 21       |          |          |          |          |          |          |
|----------|----------|----------|----------|----------|----------|----------|----------|----------|----------|----------|----------|----------|----------|
|          | 2        | 4        | 6        | 8        | 10       | 12       | 13       |          |          |          |          |          |          |
| -25157.3 | -4.22783 | -25121.9 | -1.91598 | -25084.9 | 2.036416 | -25049.9 | 3.968899 | -25019.4 | 1.469365 | -24973.2 | 14.6546  | -24966.3 | 4.998474 |
| -25156.4 | -3.32855 | -25121.8 | -1.86111 | -25088.6 | -1.64931 | -25051.9 | 1.989577 | -25015.9 | 4.990805 | -24978.7 | 9.168477 | -24967.1 | 4.263415 |
| -25156.9 | -3.83644 | -25120.9 | -0.91866 | -25086.1 | 0.858515 | -25051.6 | 2.267629 | -25019   | 1.825912 | -24986.6 | 1.202963 | -24967.7 | 3.635914 |
| -25157.5 | -4.45367 | -25121.6 | -1.57994 | -25086   | 0.981974 | -25051.8 | 2.157499 | -25018.4 | 2.487137 | -24983.6 | 4.190706 | -24959.3 | 12.05972 |
| -25157.2 | -4.2114  | -25122.8 | -2.76818 | -25087.1 | -0.11134 | -25051.7 | 2.176556 | -25019.3 | 1.5889   | -24986.4 | 1.480186 | -24970.9 | 0.403499 |
| -25155.7 | -2.69488 | -25124.2 | -4.24962 | -25083.4 | 3.574469 | -25051.9 | 2.000738 | -25017   | 3.922392 | -24981.5 | 6.347626 | -24967.3 | 4.022436 |
| -25155.9 | -2.87001 | -25122.3 | -2.34107 | -25085.5 | 1.437631 | -25052.8 | 1.091401 | -25015.6 | 5.24322  | -24985.2 | 2.649457 | -24972.1 | -0.81318 |
| -25157.5 | -4.44763 | -25120.3 | -0.33144 | -25085.6 | 1.392892 | -25053.3 | 0.579821 | -25019   | 1.85241  | -24984.6 | 3.274363 | -24966.5 | 4.791846 |
| -25156.7 | -3.70592 | -25120.9 | -0.86817 | -25087.7 | -0.71982 | -25051.8 | 2.104597 | -25014.7 | 6.165108 | -24979.8 | 8.070165 | -24967.2 | 4.075742 |
| -25156.9 | -3.82565 | -25122.8 | -2.78369 | -25086.7 | 0.238353 | -25054.8 | -0.8689  | -25017   | 3.91665  | -24979.6 | 8.208576 | -24970.4 | 0.940209 |
| -25158.3 | -5.23694 | -25122.8 | -2.84055 | -25084.5 | 2.47048  | -25055.7 | -1.7764  | -25018.2 | 2.721874 | -24986.5 | 1.334092 | -24969.2 | 2.074515 |
| -25156.8 | -3.82332 | -25121.4 | -1.44125 | -25087.8 | -0.83633 | -25053.2 | 0.675102 | -25017.5 | 3.353479 | -24976   | 11.78874 | -24962.7 | 8.606322 |
| -25155.2 | -2.20956 | -25120.1 | -0.12111 | -25088.9 | -1.96687 | -25053.4 | 0.518042 | -25020.1 | 0.734677 | -24983   | 4.815441 | -24964.9 | 6.456978 |
| -25156.7 | -3.66938 | -25122.3 | -2.34383 | -25086.7 | 0.289045 | -25053.2 | 0.690126 | -25017.9 | 2.940541 | -24981   | 6.824952 | -24963.9 | 7.44271  |
| -25151.9 | 1.120658 | -25121.9 | -1.87227 | -25084.1 | 2.853524 | -25055   | -1.13068 | -25016.4 | 4.437281 | -24984.1 | 3.701935 | -24969.1 | 2.233905 |
| -25157.7 | -4.6583  | -25122.5 | -2.53372 | -25084.3 | 2.687844 | -25052.4 | 1.504634 | -25017.5 | 3.415258 | -24984.4 | 3.402879 | -24953.1 | 18.20312 |
| -25156.5 | -3.50187 | -25122.9 | -2.92983 | -25085.9 | 1.002449 | -25053.1 | 0.84965  | -25015.9 | 4.990354 | -24985.1 | 2.716564 | -24967.3 | 3.970999 |

|          |          |          |          |          |          |          |          |          |          |          |          |          |          |
|----------|----------|----------|----------|----------|----------|----------|----------|----------|----------|----------|----------|----------|----------|
| -25155.9 | -2.84418 | -25122.3 | -2.33937 | -25085.2 | 1.7205   | -25051.2 | 2.71349  | -25017.9 | 2.976325 | -24982.2 | 5.660856 | -24968   | 3.32377  |
| -25157.6 | -4.5566  | -25119.5 | 0.486249 | -25086.7 | 0.218487 | -25052.8 | 1.151148 | -25016.5 | 4.406892 | -24973   | 14.80201 | -24961.5 | 9.794532 |
| -25157   | -3.93138 | -25122.1 | -2.11718 | -25087.7 | -0.73771 | -25054.2 | -0.29754 | -25020   | 0.895868 | -24981.9 | 5.906316 | -24969.8 | 1.531028 |
| -25156.7 | -3.71119 | -25122.1 | -2.11628 | -25086.3 | 0.635206 | -25048   | 5.954556 | -25017.7 | 3.1418   | -24986.4 | 1.44148  | -24955.6 | 15.76084 |
| -25157.3 | -4.32079 | -25121.1 | -1.11998 | -25087.6 | -0.62893 | -25051.3 | 2.604742 | -25015.8 | 5.095732 | -24979.5 | 8.368544 | -24966.3 | 4.987965 |
| -25155.9 | -2.88738 | -25122.8 | -2.78541 | -25084.2 | 2.763747 | -25052.1 | 1.862087 | -25016.6 | 4.286801 | -24986.5 | 1.371921 | -24962.9 | 8.460192 |
| -25156.5 | -3.51863 | -25123.2 | -3.21583 | -25087.1 | -0.17413 | -25051.9 | 2.007535 | -25014.2 | 6.657547 | -24979   | 8.836582 | -24967.6 | 3.755049 |
| -25156.8 | -3.73908 | -25122.3 | -2.29678 | -25084.3 | 2.648861 | -25053.1 | 0.7946   | -25019   | 1.911879 | -24986.1 | 1.78353  | -24967.5 | 3.832213 |
| -25154.5 | -1.42541 | -25121.7 | -1.68705 | -25088.5 | -1.58901 | -25052.2 | 1.751638 | -25021.3 | -0.44568 | -24986.9 | 0.933164 | -24959.6 | 11.75189 |
| -25156.4 | -3.40861 | -25123   | -2.99688 | -25085.5 | 1.48812  | -25052.2 | 1.688869 | -25019.8 | 1.027994 | -24981.6 | 6.200662 | -24965.7 | 5.659438 |
| -25156.9 | -3.90644 | -25121.6 | -1.63805 | -25089   | -2.01415 | -25055.3 | -1.40655 | -25018.3 | 2.600296 | -24984   | 3.812043 | -24971.6 | -0.26414 |
| -25155   | -1.98372 | -25122.2 | -2.18317 | -25088.3 | -1.39171 | -25053.5 | 0.445448 | -25018.9 | 2.017167 | -24985   | 2.84397  | -24966.5 | 4.826989 |
| -25155.3 | -2.29858 | -25122.2 | -2.25234 | -25085.2 | 1.792285 | -25053.5 | 0.382725 | -25019.5 | 1.377535 | -24979.2 | 8.645995 | -24944.4 | 26.95957 |
| -25156.2 | -3.17769 | -25122.9 | -2.91198 | -25087.6 | -0.64722 | -25048.6 | 5.337665 | -25018.7 | 2.145851 | -24982.2 | 5.628349 | -24964.7 | 6.633225 |
| -25154.9 | -1.87544 | -25121.9 | -1.88239 | -25080.8 | 6.140936 | -25052.7 | 1.207853 | -25013.9 | 6.989447 | -24982.9 | 4.936595 | -24963.9 | 7.43119  |
| -25157   | -4.02006 | -25120.7 | -0.66985 | -25085.8 | 1.162261 | -25053.8 | 0.151813 | -25018.7 | 2.132504 | -24980   | 7.820258 | -24968.4 | 2.930696 |
| -25157.8 | -4.79704 | -25120.3 | -0.32729 | -25088.2 | -1.28115 | -25049.8 | 4.116821 | -25015.9 | 4.994846 | -24980   | 7.856801 | -24959.9 | 11.40193 |
| -25156.6 | -3.58359 | -25118.4 | 1.557224 | -25086   | 0.952445 | -25052.7 | 1.185165 | -25017.7 | 3.126307 | -24983.5 | 4.351389 | -24969.1 | 2.237759 |
| -25156.9 | -3.92374 | -25122.9 | -2.89226 | -25087   | -0.07488 | -25050.3 | 3.577497 | -25018.6 | 2.320767 | -24985.1 | 2.70912  | -24966   | 5.299509 |
| -25156.3 | -3.23869 | -25121.5 | -1.46751 | -25089.1 | -2.11297 | -25054.6 | -0.68903 | -25016   | 4.859426 | -24985.7 | 2.102266 | -24964.7 | 6.646546 |
| -25157.9 | -4.85412 | -25119.8 | 0.178328 | -25083.5 | 3.404173 | -25046   | 7.869459 | -25015.8 | 5.083997 | -24975.9 | 11.96991 | -24966.5 | 4.789419 |
| -25156.6 | -3.62291 | -25123.8 | -3.80821 | -25084   | 2.907162 | -25054.7 | -0.75254 | -25020   | 0.8985   | -24982.4 | 5.474145 | -24970.3 | 1.002737 |
| -25157.5 | -4.48611 | -25122.7 | -2.72448 | -25085.6 | 1.386395 | -25051.8 | 2.129146 | -25016.1 | 4.824911 | -24981.3 | 6.524471 | -24966.9 | 4.431011 |
| -25155.6 | -2.54711 | -25122.6 | -2.63642 | -25088.9 | -1.90136 | -25049.5 | 4.456694 | -25014.7 | 6.196374 | -24987.3 | 0.586628 | -6.6E+11 | -6.6E+11 |
| -25156.7 | -3.66713 | -25123.1 | -3.12987 | -25088.8 | -1.89386 | -25043.3 | 10.5931  | -25009.1 | 11.78021 | -24977.5 | 10.36626 | -24971.1 | 0.178396 |
| -25155.8 | -2.81503 | -25123.8 | -3.77097 | -25086.7 | 0.292491 | -25043.9 | 10.05116 | -25016.1 | 4.785258 | -24982.2 | 5.649306 | -24958.6 | 12.69268 |
| -25155.9 | -2.83467 | -25122.8 | -2.80528 | -25085.5 | 1.400892 | -25053   | 0.92428  | -25015.1 | 5.76826  | -24983   | 4.838617 | -24960.1 | 11.25682 |
| -25156.7 | -3.69714 | -25120.6 | -0.65349 | -25087.9 | -0.9668  | -25053.9 | 0.043885 | -25020.5 | 0.32583  | -24984.1 | 3.702093 | -24966.1 | 5.20651  |
| -25157.2 | -4.21235 | -25122.8 | -2.80095 | -25082.8 | 4.178718 | -25050.6 | 3.30063  | -25012.3 | 8.594429 | -24983   | 4.848694 | -24971.5 | -0.1593  |
| -25158.6 | -5.55611 | -25122.5 | -2.50372 | -25087.2 | -0.27956 | -25052.5 | 1.460991 | -25013.5 | 7.371191 | -24980.4 | 7.413365 | -24960.2 | 11.11781 |
| -25156.7 | -3.69551 | -25122.2 | -2.16555 | -25087.1 | -0.17477 | -25049.3 | 4.641413 | -25016.6 | 4.272185 | -24984.6 | 3.205544 | -24964.4 | 6.923437 |
| -25156.5 | -3.43567 | -25122.1 | -2.08995 | -25086.3 | 0.669684 | -25051.4 | 2.471286 | -25018.1 | 2.80209  | -24975.5 | 12.37003 | -24969.1 | 2.248727 |
| -25155.6 | -2.53164 | -25121.8 | -1.82369 | -25088.9 | -1.95812 | -25051.1 | 2.782749 | -25012.9 | 7.945497 | -24984.9 | 2.967718 | -24968.3 | 2.986785 |
| -25156.9 | -3.83191 | -25121.1 | -1.06876 | -25088.3 | -1.35769 | -25053.3 | 0.647391 | -25017.2 | 3.64949  | -24981.6 | 6.223857 | -24965.1 | 6.258832 |
| -25158.4 | -5.33515 | -25121.5 | -1.55574 | -25085.8 | 1.20003  | -25053.2 | 0.704857 | -25018.9 | 1.955547 | -24983.3 | 4.509695 | -24967.5 | 3.777233 |
| -25156.2 | -3.14138 | -25122.1 | -2.13352 | -25081.9 | 5.008564 | -25052.1 | 1.801621 | -25016   | 4.883451 | -24980.3 | 7.539783 | -24963.9 | 7.469919 |
| -25157.2 | -4.14751 | -25120.6 | -0.62915 | -25087.1 | -0.15446 | -25051.8 | 2.139943 | -25014.2 | 6.646174 | -24985.7 | 2.109531 | -24963.5 | 7.849784 |
| -25157.2 | -4.20695 | -25121.2 | -1.17313 | -25085.8 | 1.114742 | -25052.3 | 1.656351 | -25018.6 | 2.250566 | -24984.5 | 3.300378 | -24966.6 | 4.7554   |
| -25156.6 | -3.54087 | -25119.2 | 0.805587 | -25088.2 | -1.27716 | -25051.7 | 2.163619 | -25015.5 | 5.39618  | -24984.8 | 3.07547  | -24969.4 | 1.87465  |
| -25155.6 | -2.57359 | -25122   | -2.05047 | -25086.9 | 0.055112 | -25056.8 | -2.8396  | -25009.2 | 11.70729 | -24982.7 | 5.107353 | -24962.2 | 9.10785  |
| -25154.9 | -1.8467  | -25122.7 | -2.73755 | -25086.4 | 0.545495 | -25050.1 | 3.843847 | -25014.6 | 6.250913 | -24981.1 | 6.717173 | -24967.9 | 3.428059 |

|          |          |          |          |          |          |          |          |          |          |          |          |          |          |
|----------|----------|----------|----------|----------|----------|----------|----------|----------|----------|----------|----------|----------|----------|
| -25156.1 | -3.07168 | -25122.4 | -2.3786  | -25082   | 4.91884  | -25054.4 | -0.44144 | -25017.7 | 3.133295 | -24982.9 | 4.891817 | -24964.7 | 6.581982 |
| -25155.4 | -2.39491 | -25123.4 | -3.37508 | -25086.7 | 0.233938 | -25052.6 | 1.275887 | -25013.4 | 7.430785 | -24980.4 | 7.391847 | -24961.6 | 9.728458 |
| -25158.1 | -5.06639 | -25122.1 | -2.11122 | -25088.1 | -1.19312 | -25051.8 | 2.104353 | -25018.7 | 2.17766  | -24980   | 7.85139  | -24961.4 | 9.901603 |
| -25156.9 | -3.92063 | -25123.2 | -3.23613 | -25088.3 | -1.36528 | -25049.8 | 4.119491 | -25019.9 | 0.929361 | -24984.5 | 3.308638 | -24970.1 | 1.216334 |
| -25156.2 | -3.19811 | -25121.1 | -1.12409 | -25087.4 | -0.40743 | -25054.3 | -0.37917 | -25017.9 | 3.021443 | -24985.1 | 2.78375  | -24962.5 | 8.791384 |
| -25157.4 | -4.38111 | -25124.2 | -4.22225 | -25084.7 | 2.284006 | -25054.3 | -0.34595 | -25015.8 | 5.113971 | -24977.9 | 9.908107 | -24962.8 | 8.519147 |
| -25155.6 | -2.60281 | -25123.6 | -3.62613 | -25086.1 | 0.820908 | -25049.6 | 4.3466   | -25019.9 | 0.936985 | -24984.1 | 3.747507 | -24967.5 | 3.780072 |
| -25156.2 | -3.14739 | -25122.7 | -2.68871 | -25087.5 | -0.55839 | -25054   | -0.06469 | -25019.9 | 0.946022 | -24987.3 | 0.55016  | -24962.6 | 8.690989 |
| -25156.5 | -3.46084 | -25122.4 | -2.41458 | -25084.3 | 2.609837 | -25050.9 | 2.998059 | -25021.4 | -0.52649 | -24981.9 | 5.888637 | -24966.6 | 4.740087 |
| -25156.4 | -3.3577  | -25122.4 | -2.38202 | -25090   | -3.06749 | -25053   | 0.891269 | -25016.4 | 4.476638 | -24978.1 | 9.694602 | -24967.3 | 3.994982 |
| -25155.7 | -2.66561 | -25121.8 | -1.78547 | -25086.3 | 0.606387 | -25045.3 | 8.648925 | -25016.3 | 4.537507 | -24981.6 | 6.219801 | -24958.9 | 12.38745 |
| -25156.3 | -3.27209 | -25120.2 | -0.20687 | -25086.8 | 0.195486 | -25049.5 | 4.391228 | -25019.6 | 1.305168 | -24980.9 | 6.921759 | -24966.6 | 4.676275 |
| -25154.8 | -1.7752  | -25122.6 | -2.6583  | -25087.4 | -0.45094 | -25052.4 | 1.476163 | -25013.2 | 7.684949 | -24986.2 | 1.659062 | -24967.8 | 3.554543 |
| -25156.6 | -3.53988 | -25122.1 | -2.11487 | -25084.7 | 2.238707 | -25054.2 | -0.33321 | -25011.9 | 8.938111 | -24984.7 | 3.174074 | -24965.5 | 5.828108 |
| -25156   | -2.96105 | -25120.4 | -0.46233 | -25084.8 | 2.160226 | -25051.5 | 2.376615 | -25016.1 | 4.824709 | -24982.7 | 5.14349  | -24967   | 4.313585 |
| -25156.5 | -3.44267 | -25123.9 | -3.89967 | -25086.5 | 0.444957 | -25053.7 | 0.218434 | -25018.9 | 2.00545  | -24981.5 | 6.379728 | -24967.7 | 3.602818 |
| -25155.8 | -2.76765 | -25120.5 | -0.50838 | -25087   | -0.02057 | -25050.4 | 3.553068 | -25014.6 | 6.231993 | -24980.3 | 7.526482 | -24965.4 | 5.926646 |
| -25156.6 | -3.56839 | -25122   | -2.05173 | -25088.2 | -1.28385 | -25042.7 | 11.25552 | -25017.1 | 3.741782 | -24982.2 | 5.627013 | -24965.1 | 6.269946 |
| -25156.6 | -3.58218 | -25121.7 | -1.66257 | -25087.9 | -0.96515 | -25055.1 | -1.15521 | -25017.6 | 3.309849 | -24982.7 | 5.153708 | -24963.6 | 7.753819 |
| -25158.2 | -5.19566 | -25121   | -1.02743 | -25086.3 | 0.647173 | -25055.1 | -1.13721 | -25019.9 | 0.926244 | -24984.6 | 3.282254 | -24966   | 5.356712 |
| -25157.5 | -4.50258 | -25122   | -1.99762 | -25087.7 | -0.76591 | -25050.7 | 3.170464 | -25015.2 | 5.688645 | -24980   | 7.855067 | -24967.3 | 4.013199 |
| -25156.9 | -3.89463 | -25118.7 | 1.24925  | -25088.2 | -1.25163 | -25049.5 | 4.458488 | -25017.7 | 3.177061 | -24978.7 | 9.188557 | -24961.2 | 10.10021 |
| -25156.4 | -3.40623 | -25122.3 | -2.30378 | -25086.7 | 0.221265 | -25053.2 | 0.668356 | -25017.8 | 3.097638 | -24985.6 | 2.18995  | -24958   | 13.35514 |
| -25157   | -3.96574 | -25123   | -3.03438 | -25087.9 | -0.94973 | -25050.5 | 3.419188 | -25017.1 | 3.747185 | -24987.5 | 0.306533 | -24965.3 | 6.004404 |
| -25157.5 | -4.4911  | -25120.3 | -0.34725 | -25086.7 | 0.222404 | -25055.2 | -1.24652 | -25018.4 | 2.432207 | -24984.3 | 3.569334 | -24962.2 | 9.151911 |
| -25156.8 | -3.78221 | -25122.4 | -2.45625 | -25089   | -2.0815  | -25054.3 | -0.36809 | -25016.1 | 4.763764 | -24980.4 | 7.488335 | -24971.8 | -0.46212 |
| -25158.4 | -5.40061 | -25122.3 | -2.32273 | -25087   | -0.00917 | -25053.4 | 0.553352 | -25020   | 0.85792  | -24984.5 | 3.341269 | -24964.2 | 7.152485 |
| -25155.5 | -2.51245 | -25117.9 | 2.117402 | -25085.5 | 1.432907 | -25048.7 | 5.241964 | -25017.3 | 3.578247 | -24984.8 | 3.06044  | -24965.1 | 6.18075  |
| -25157.2 | -4.13611 | -25118   | 1.940947 | -25085.1 | 1.807553 | -25053.3 | 0.594325 | -25016.7 | 4.213305 | -24982.7 | 5.10209  | -24966.3 | 5.004572 |
| -25156.3 | -3.32301 | -25122.2 | -2.18413 | -25089   | -2.00187 | -25052.4 | 1.501292 | -25019.5 | 1.401511 | -24981.7 | 6.169616 | -24969.5 | 1.825146 |
| -25156.6 | -3.6101  | -25122.3 | -2.2965  | -25088.5 | -1.51659 | -25054.3 | -0.34496 | -25016.2 | 4.643397 | -24980.8 | 7.079006 | -24968.4 | 2.897131 |
| -25157.8 | -4.80988 | -25122.1 | -2.14986 | -25086.2 | 0.798985 | -25056.1 | -2.22877 | -25017   | 3.857064 | -24981.7 | 6.146286 | -24962   | 9.356307 |
| -25157.7 | -4.6478  | -25121.6 | -1.6087  | -25087.5 | -0.58125 | -25051.9 | 1.967464 | -25016.9 | 3.984396 | -24988.9 | -1.06459 | -24965.2 | 6.150472 |
| -25156.4 | -3.38151 | -25119   | 0.996379 | -25088.4 | -1.40455 | -25054.5 | -0.56329 | -25018.8 | 2.108427 | -24985.5 | 2.322789 | -24968.9 | 2.435823 |
| -25157.2 | -4.15984 | -25120.9 | -0.88776 | -25086.1 | 0.828313 | -25050.7 | 3.220432 | -25014.5 | 6.418344 | -24983.6 | 4.230414 | -24967.5 | 3.848243 |
| -25156.7 | -3.72073 | -25120.1 | -0.07264 | -25089.2 | -2.25671 | -25049.8 | 4.102777 | -25021   | -0.10857 | -24985.2 | 2.604383 | -24965   | 6.347953 |
| -25157.3 | -4.30267 | -25121.5 | -1.50254 | -25084.5 | 2.403703 | -25051.3 | 2.587328 | -25016.9 | 3.985204 | -24978   | 9.874724 | -24964.2 | 7.159382 |
| -25157.4 | -4.34898 | -25119.8 | 0.212442 | -25088.9 | -1.96326 | -25054   | -0.05538 | -25020.5 | 0.3552   | -24984.5 | 3.347339 | -24964.3 | 7.049859 |
| -25154.7 | -1.69678 | -25123.2 | -3.25753 | -25086.3 | 0.610729 | -25054.1 | -0.19609 | -25019.3 | 1.587104 | -24984.6 | 3.210101 | -24969.5 | 1.804304 |
| -25156.7 | -3.72114 | -25121.2 | -1.24597 | -25089.8 | -2.87403 | -25046   | 7.912437 | -25017.3 | 3.605859 | -24984.2 | 3.632768 | -24967   | 4.290639 |
| -25156.4 | -3.4171  | -25122.8 | -2.77422 | -25086   | 0.99954  | -25051   | 2.949057 | -25017.5 | 3.375641 | -24982.2 | 5.617689 | -24963.5 | 7.775378 |

|          |          |          |          |          |          |          |          |          |          |          |          |          |          |
|----------|----------|----------|----------|----------|----------|----------|----------|----------|----------|----------|----------|----------|----------|
| -25156   | -3.00358 | -25119.9 | 0.047223 | -25089.5 | -2.51746 | -25052.4 | 1.527637 | -25018.5 | 2.330408 | -24983   | 4.838492 | -24964.8 | 6.498486 |
| -25155.3 | -2.28865 | -25123.7 | -3.71553 | -25086.7 | 0.216113 | -25052.7 | 1.199221 | -25019.8 | 1.049166 | -24980.3 | 7.528513 | -24964.8 | 6.47429  |
| -25155.4 | -2.36992 | -25121.3 | -1.28097 | -25085   | 1.921368 | -25052.5 | 1.431121 | -25020.3 | 0.585298 | -25021   | -33.1273 | -24967.9 | 3.380964 |
| -25155.7 | -2.67107 | -25121.1 | -1.12397 | -25082.2 | 4.714212 | -25053.9 | 0.030778 | -25013.5 | 7.399193 | -24982.2 | 5.618964 | -24964.6 | 6.676832 |
| -25157.3 | -4.2517  | -25123.1 | -3.14459 | -25086.6 | 0.30948  | -25050.2 | 3.742397 | -25021.1 | -0.20504 | -24987.4 | 0.40791  | -24966.8 | 4.523617 |
| -25156.3 | -3.2379  | -25122.2 | -2.26198 | -25086.8 | 0.124241 | -25051.8 | 2.095462 | -25014.6 | 6.252262 | -24981.7 | 6.105115 | -24967   | 4.338364 |
| -25157.3 | -4.32358 | -25122.5 | -2.52561 | -25087.2 | -0.23121 | -25049.3 | 4.606138 | -25019.5 | 1.35222  | -24979.5 | 8.304921 | -24967.9 | 3.403688 |
| -25157   | -3.92896 | -25122.2 | -2.16965 | -25086.1 | 0.871393 | -25054.5 | -0.53836 | -25013.1 | 7.790662 | -24985.2 | 2.621524 | -24969.6 | 1.674247 |
| -25156.7 | -3.66401 | -25121.9 | -1.87065 | -25083.4 | 3.547654 | -25050.1 | 3.859117 | -25017.7 | 3.143494 | -24981.1 | 6.756729 | -24967.2 | 4.09747  |
| -25156.4 | -3.36815 | -25122.2 | -2.1811  | -25086   | 0.985314 | -25051.6 | 2.285129 | -25014.8 | 6.04016  | -24985.1 | 2.708596 | -24965.8 | 5.489214 |
| -25157   | -3.97799 | -25121   | -1.05411 | -25087.2 | -0.23381 | -25052.3 | 1.607034 | -25012.7 | 8.133388 | -24978.3 | 9.57116  | -24965.4 | 5.906737 |
| -25155.9 | -2.86629 | -25122.8 | -2.85791 | -25087.7 | -0.70138 | -25055.2 | -1.32722 | -25013.9 | 7.007806 | -24985.2 | 2.681515 | -24964.7 | 6.63909  |
| -25156.8 | -3.74067 | -25120.5 | -0.5339  | -25088.3 | -1.35718 | -25051.9 | 2.00733  | -25017.4 | 3.427568 | -24984.7 | 3.106652 | -24966.8 | 4.475444 |
| -25156.3 | -3.22995 | -25123.3 | -3.36016 | -25087.6 | -0.6789  | -25050.6 | 3.263033 | -25014.2 | 6.648479 | -24981.5 | 6.36927  | -24964   | 7.300746 |
| -25157.4 | -4.42377 | -25122.1 | -2.06823 | -25088.1 | -1.13713 | -25055.1 | -1.15993 | -25017.8 | 3.116389 | -24974.3 | 13.51187 | -24965.2 | 6.14548  |
| -25157.9 | -4.84886 | -25121.2 | -1.18931 | -25087.4 | -0.42372 |          |          | -25017.5 | 3.420312 |          |          | -24965.3 | 6.052817 |
| -25157.1 | -4.08006 |          |          | -25088.2 | -1.27992 |          |          | -25016   | 4.850855 |          |          |          |          |
| -25153.1 | -0.08932 |          |          |          |          |          |          | -25019.1 | 1.774605 |          |          |          |          |
| -25156.3 | -3.29708 |          |          |          |          |          |          |          |          |          |          |          |          |
| -25158   | -4.97081 |          |          |          |          |          |          |          |          |          |          |          |          |
| -25155.6 | -2.58249 |          |          |          |          |          |          |          |          |          |          |          |          |

Average energies -25156.56 -3.53 -25121.80 -1.81 -25086.59 0.36 -25052.01 1.90 -25017.10 3.77 -24982.82 5.02 -24965.46 5.86

## U

|                                     | ground state energy | solid solution energy |                 |                 |                 |                 |                |      |  |    |  |    |  |
|-------------------------------------|---------------------|-----------------------|-----------------|-----------------|-----------------|-----------------|----------------|------|--|----|--|----|--|
| concentration in solid solution (%) | 3                   | 6                     |                 | 9               |                 | 12              |                | 15   |  | 18 |  | 21 |  |
| number of atoms                     | 2                   | 4                     |                 | 6               |                 | 8               |                | 10   |  | 12 |  | 13 |  |
|                                     | -25160.98           | -2.93 -25131.46       | -1.43 -25102.30 | -0.30 -25071.50 | 2.49 -25042.88  | 3.09 -25015.69  | 2.26 -24998.92 | 5.03 |  |    |  |    |  |
|                                     | -25160.62           | -2.58 -25130.59       | -0.57 -25103.45 | -1.45 -25074.24 | -0.25 -25044.61 | 1.36 -25009.38  | 8.57 -24995.91 | 8.03 |  |    |  |    |  |
|                                     | -25153.70           | 4.34 -25125.38        | 4.65 -25102.22  | -0.22 -25073.27 | 0.71 -25044.63  | 1.33 -25017.11  | 0.84 -24999.25 | 4.69 |  |    |  |    |  |
|                                     | -25161.67           | -3.63 -25132.71       | -2.69 -25103.68 | -1.68 -25064.01 | 9.98 -25041.98  | 3.98 -25015.46  | 2.49 -24999.78 | 4.16 |  |    |  |    |  |
|                                     | -25162.24           | -4.20 -25129.12       | 0.91 -25092.29  | 9.71 -25072.86  | 1.13 -25038.47  | 7.50 -25016.51  | 1.44 -25000.82 | 3.12 |  |    |  |    |  |
|                                     | -25161.65           | -3.61 -25132.92       | -2.89 -25100.56 | 1.45 -25066.71  | 7.28 -25044.50  | 1.47 -25011.28  | 6.67 -25002.29 | 1.65 |  |    |  |    |  |
|                                     | -25159.63           | -1.59 -25132.02       | -1.99 -25101.25 | 0.76 -25072.39  | 1.60 -25046.61  | -0.64 -25015.24 | 2.71 -24998.06 | 5.88 |  |    |  |    |  |
|                                     | -25159.47           | -1.43 -25132.39       | -2.37 -25100.36 | 1.64 -25070.62  | 3.37 -25039.84  | 6.13 -25013.80  | 4.15 -25000.62 | 3.32 |  |    |  |    |  |
|                                     | -25158.94           | -0.90 -25130.84       | -0.81 -25102.17 | -0.16 -25070.87 | 3.11 -25042.82  | 3.15 -25016.28  | 1.67 -25003.86 | 0.09 |  |    |  |    |  |
|                                     | -25159.18           | -1.13 -25130.07       | -0.04 -25100.15 | 1.86 -25069.31  | 4.68 -25040.78  | 5.19 -25017.03  | 0.92 -24998.76 | 5.19 |  |    |  |    |  |
|                                     | -25160.46           | -2.42 -25132.47       | -2.44 -25102.16 | -0.15 -25072.97 | 1.02 -25043.03  | 2.94 -25008.31  | 9.64 -25003.44 | 0.50 |  |    |  |    |  |



|           |       |           |       |           |       |           |       |           |       |           |       |           |       |
|-----------|-------|-----------|-------|-----------|-------|-----------|-------|-----------|-------|-----------|-------|-----------|-------|
| -25159.97 | -1.93 | -25129.38 | 0.64  | -25099.76 | 2.25  | -25069.75 | 4.24  | -25041.25 | 4.72  | -25013.69 | 4.26  | -24994.51 | 9.43  |
| -25160.20 | -2.16 | -25131.93 | -1.90 | -25101.98 | 0.03  | -25073.19 | 0.80  | -25044.63 | 1.34  | -25011.09 | 6.86  | -24994.58 | 9.36  |
| -25161.24 | -3.20 | -25132.43 | -2.41 | -25100.18 | 1.83  | -25070.51 | 3.48  | -25042.99 | 2.98  | -25011.87 | 6.08  | -25000.55 | 3.39  |
| -25160.51 | -2.47 | -25130.78 | -0.76 | -25100.32 | 1.69  | -25073.93 | 0.05  | -25043.00 | 2.96  | -25006.44 | 11.51 | -24998.73 | 5.21  |
| -25161.64 | -3.60 | -25131.83 | -1.81 | -25102.31 | -0.30 | -25069.92 | 4.07  | -25043.63 | 2.34  | -25003.67 | 14.28 | -25000.84 | 3.11  |
| -25160.77 | -2.72 | -25132.38 | -2.35 | -25097.58 | 4.42  | -25070.70 | 3.29  | -25043.18 | 2.79  | -25014.73 | 3.22  | -25001.27 | 2.67  |
| -25160.01 | -1.97 | -25131.73 | -1.71 | -25101.95 | 0.06  | -25072.86 | 1.13  | -25042.34 | 3.63  | -25013.17 | 4.79  | -25001.42 | 2.52  |
| -25160.05 | -2.01 | -25131.56 | -1.53 | -25099.90 | 2.10  | -25072.42 | 1.56  | -25042.30 | 3.67  | -25013.28 | 4.67  | -24997.06 | 6.88  |
| -25161.16 | -3.12 | -25130.48 | -0.46 | -25099.76 | 2.24  | -25072.16 | 1.83  | -25041.43 | 4.54  | -25011.69 | 6.26  | -24999.75 | 4.19  |
| -25160.98 | -2.94 | -25130.79 | -0.77 | -25101.73 | 0.28  | -25073.01 | 0.98  | -25043.93 | 2.04  | -25016.26 | 1.70  | -25001.66 | 2.28  |
| -25161.10 | -3.05 | -25131.01 | -0.99 | -25102.59 | -0.59 | -25075.26 | -1.28 | -25045.11 | 0.86  | -25016.91 | 1.04  | -24997.83 | 6.12  |
| -25158.63 | -0.58 | -25131.42 | -1.40 | -25103.95 | -1.95 | -25072.78 | 1.20  | -25045.71 | 0.26  | -25013.60 | 4.35  | -24995.15 | 8.79  |
| -25158.92 | -0.88 | -25132.26 | -2.24 | -25101.08 | 0.92  | -25068.69 | 5.30  | -25045.55 | 0.42  | -25011.50 | 6.45  | -25001.14 | 2.80  |
| -25161.00 | -2.96 | -25129.95 | 0.07  | -25100.44 | 1.57  | -25070.11 | 3.87  | -25044.05 | 1.92  | -25014.56 | 3.39  | -24995.35 | 8.60  |
| -25161.74 | -3.69 | -25131.54 | -1.51 | -25094.61 | 7.39  | -25071.49 | 2.50  | -25044.18 | 1.79  | -25015.75 | 2.20  | -24992.66 | 11.29 |
| -25161.43 | -3.39 | -25132.07 | -2.05 | -25103.15 | -1.14 | -25074.35 | -0.36 | -25041.04 | 4.93  | -25012.14 | 5.81  | -24998.04 | 5.90  |
| -25160.70 | -2.66 | -25131.98 | -1.96 | -25096.67 | 5.33  | -25068.09 | 5.90  | -25044.78 | 1.19  | -25012.97 | 4.98  | -24999.33 | 4.62  |
| -25160.90 | -2.85 | -25132.52 | -2.50 | -25103.72 | -1.71 | -25076.24 | -2.25 | -25042.61 | 3.36  | -25013.65 | 4.30  | -24998.21 | 5.73  |
| -25160.97 | -2.93 | -25132.57 | -2.54 | -25100.50 | 1.51  | -25073.56 | 0.42  | -25042.36 | 3.61  | -25014.77 | 3.18  | -24997.55 | 6.39  |
| -25160.64 | -2.60 | -25131.01 | -0.98 | -25103.14 | -1.13 | -25072.06 | 1.93  | -25038.60 | 7.37  | -25011.30 | 6.65  | -25002.84 | 1.10  |
| -25161.44 | -3.40 | -25132.26 | -2.23 | -25099.67 | 2.34  | -25070.71 | 3.28  | -25045.65 | 0.32  | -25015.45 | 2.51  | -24997.92 | 6.02  |
| -25161.23 | -3.18 | -25132.96 | -2.94 | -25097.51 | 4.50  | -25073.04 | 0.95  | -25046.24 | -0.27 | -25014.83 | 3.12  | -25000.35 | 3.60  |
| -25159.79 | -1.75 | -25130.61 | -0.58 | -25100.36 | 1.64  | -25073.78 | 0.21  | -25046.75 | -0.78 | -25012.40 | 5.55  | -24999.08 | 4.86  |
| -25160.65 | -2.60 | -25131.85 | -1.83 | -25100.83 | 1.18  | -25074.35 | -0.36 | -25025.85 | 20.12 | -25011.72 | 6.23  | -24996.87 | 7.07  |
| -25161.05 | -3.00 | -25129.88 | 0.15  | -25102.69 | -0.68 | -25073.93 | 0.06  | -25043.99 | 1.98  | -25012.28 | 5.67  | -24995.74 | 8.20  |
| -25160.73 | -2.69 | -25130.83 | -0.80 | -25100.87 | 1.13  | -25071.03 | 2.96  | -25042.54 | 3.42  | -25012.61 | 5.34  | -25000.86 | 3.09  |
| -25160.47 | -2.43 | -25131.67 | -1.65 | -25100.86 | 1.14  | -25068.80 | 5.19  | -25040.87 | 5.10  | -25017.25 | 0.70  | -24996.13 | 7.81  |
| -25160.84 | -2.79 | -25130.90 | -0.88 | -25099.70 | 2.31  | -25067.89 | 6.10  | -25042.53 | 3.44  | -25014.43 | 3.52  | -24996.12 | 7.83  |
| -25161.46 | -3.42 | -25130.82 | -0.79 | -25102.89 | -0.88 | -25070.82 | 3.16  | -25041.67 | 4.30  | -25009.33 | 8.62  | -24997.59 | 6.36  |
| -25159.19 | -1.15 | -25131.14 | -1.11 | -25103.22 | -1.22 | -25069.62 | 4.36  | -25044.64 | 1.33  | -25016.72 | 1.23  | -25002.70 | 1.24  |
| -25160.59 | -2.55 | -25132.94 | -2.91 | -25103.76 | -1.76 | -25072.91 | 1.08  | -25035.36 | 10.61 | -25012.27 | 5.68  | -25000.22 | 3.72  |
| -25159.50 | -1.46 | -25131.00 | -0.97 | -25104.60 | -2.60 | -25072.79 | 1.20  | -25035.01 | 10.96 | -25016.63 | 1.33  | -25001.88 | 2.06  |
| -25159.93 | -1.89 | -25124.19 | 5.83  | -25102.57 | -0.56 | -25070.55 | 3.44  | -25043.87 | 2.10  | -25010.03 | 7.92  | -25002.73 | 1.21  |
| -25160.53 | -2.49 | -25132.46 | -2.44 | -25101.58 | 0.42  | -25073.00 | 0.99  | -25039.90 | 6.07  | -25012.05 | 5.90  | -24999.91 | 4.04  |
| -25160.12 | -2.08 | -25130.24 | -0.21 | -25103.14 | -1.14 | -25074.79 | -0.80 | -25041.16 | 4.81  | -25015.27 | 2.68  | -24996.42 | 7.52  |
| -25159.98 | -1.93 | -25132.15 | -2.13 | -25103.02 | -1.02 | -25075.90 | -1.91 | -25038.10 | 7.87  | -25014.82 | 3.13  | -24994.73 | 9.21  |
| -25151.65 | 6.40  | -25128.52 | 1.50  | -25101.39 | 0.61  | -25071.27 | 2.72  | -25043.33 | 2.64  | -25012.61 | 5.34  | -24999.04 | 4.91  |
| -25161.58 | -3.54 | -25133.04 | -3.02 | -25103.02 | -1.01 | -25072.50 | 1.48  | -25041.27 | 4.70  | -25015.26 | 2.69  | -24997.05 | 6.89  |
| -25159.64 | -1.60 | -25131.89 | -1.87 | -25100.67 | 1.34  | -25073.71 | 0.28  | -25048.28 | -2.31 | -25014.49 | 3.46  | -24997.53 | 6.41  |
| -25156.28 | 1.76  | -25132.64 | -2.61 | -25103.39 | -1.39 | -25065.76 | 8.23  | -25043.63 | 2.34  | -25005.66 | 12.29 | -24998.41 | 5.54  |
| -25160.47 | -2.43 | -25131.25 | -1.23 | -25103.19 | -1.19 | -25071.91 | 2.08  | -25042.69 | 3.28  | -25010.68 | 7.28  | -25000.38 | 3.57  |

|           |       |           |       |           |       |           |       |           |       |           |       |           |       |
|-----------|-------|-----------|-------|-----------|-------|-----------|-------|-----------|-------|-----------|-------|-----------|-------|
| -25158.18 | -0.14 | -25132.19 | -2.16 | -25102.36 | -0.36 | -25070.28 | 3.70  | -25046.10 | -0.13 | -25010.42 | 7.53  | -25001.60 | 2.34  |
| -25157.80 | 0.25  | -25131.23 | -1.20 | -25103.54 | -1.53 | -25073.54 | 0.45  | -25043.40 | 2.57  | -25016.40 | 1.56  | -24992.02 | 11.92 |
| -25161.45 | -3.41 | -25129.58 | 0.44  | -25101.31 | 0.70  | -25073.06 | 0.93  | -25043.24 | 2.73  | -25014.36 | 3.59  | -25000.00 | 3.95  |
| -25160.45 | -2.41 | -25133.02 | -3.00 | -25098.49 | 3.51  | -25067.70 | 6.28  | -25045.79 | 0.18  | -25011.62 | 6.33  | -25003.85 | 0.09  |
| -25159.17 | -1.12 | -25130.02 | 0.00  | -25100.31 | 1.70  | -25070.48 | 3.51  | -25040.33 | 5.64  | -25012.30 | 5.65  | -24999.03 | 4.91  |
| -25158.41 | -0.37 | -25129.58 | 0.45  |           |       | -25074.81 | -0.82 | -25041.01 | 4.96  | -25016.37 | 1.58  | -25001.20 | 2.74  |
| -25160.36 | -2.32 | -25129.15 | 0.88  |           |       | -25070.66 | 3.32  | -25043.16 | 2.81  | -25012.27 | 5.68  | -24999.24 | 4.71  |
| -25161.57 | -3.53 | -25130.94 | -0.92 |           |       | -25069.83 | 4.16  | -25038.73 | 7.24  | -25005.07 | 12.88 | -24999.89 | 4.05  |
| -25161.16 | -3.12 | -25127.75 | 2.28  |           |       | -25074.32 | -0.34 | -25046.10 | -0.13 | -25012.35 | 5.60  | -24998.25 | 5.69  |
| -25161.09 | -3.05 | -25131.80 | -1.78 |           |       | -25073.58 | 0.41  | -25043.88 | 2.09  | -25014.07 | 3.88  | -25000.78 | 3.17  |
| -25161.09 | -3.05 |           |       |           |       | -25070.60 | 3.39  | -25037.92 | 8.05  | -25011.99 | 5.96  | -25000.85 | 3.09  |
| -25159.53 | -1.48 |           |       |           |       | -25069.50 | 4.49  | -25034.98 | 10.99 |           |       | -24994.93 | 9.02  |
| -25159.67 | -1.63 |           |       |           |       | -25072.79 | 1.20  | -25038.51 | 7.46  |           |       |           |       |
| -25160.97 | -2.92 |           |       |           |       | -25074.17 | -0.18 | -25042.88 | 3.09  |           |       |           |       |
| -25154.69 | 3.35  |           |       |           |       | -25070.02 | 3.97  |           |       |           |       |           |       |
| -25161.37 | -3.33 |           |       |           |       | -25070.85 | 3.13  |           |       |           |       |           |       |
| -25154.32 | 3.72  |           |       |           |       | -25072.54 | 1.44  |           |       |           |       |           |       |
| -25152.64 | 5.40  |           |       |           |       |           |       |           |       |           |       |           |       |
| -25159.98 | -1.94 |           |       |           |       |           |       |           |       |           |       |           |       |
| -25160.42 | -2.38 |           |       |           |       |           |       |           |       |           |       |           |       |
| -25161.35 | -3.31 |           |       |           |       |           |       |           |       |           |       |           |       |
| -25160.19 | -2.14 |           |       |           |       |           |       |           |       |           |       |           |       |

Average energies

|           |       |           |       |           |      |           |      |           |      |           |      |           |      |
|-----------|-------|-----------|-------|-----------|------|-----------|------|-----------|------|-----------|------|-----------|------|
| -25159.92 | -1.88 | -25131.07 | -1.04 | -25101.24 | 0.76 | -25071.70 | 2.28 | -25042.31 | 3.66 | -25013.07 | 4.89 | -24998.96 | 4.98 |
|-----------|-------|-----------|-------|-----------|------|-----------|------|-----------|------|-----------|------|-----------|------|

# Ca<sub>1-x</sub>M<sub>x</sub>ZrTi<sub>2-2x</sub>Al<sub>2x</sub>O<sub>7</sub> M=(Ce, Pu, Th, U)

## Ti(1)Ti(3)

N.B. All stated energies are in eV

| Ce                                  | ground | solid     |      |           |       |           |       |           |       |           |       |           |       |
|-------------------------------------|--------|-----------|------|-----------|-------|-----------|-------|-----------|-------|-----------|-------|-----------|-------|
|                                     | state  | solution  |      |           |       |           |       |           |       |           |       |           |       |
|                                     | energy | energy    |      |           |       |           |       |           |       |           |       |           |       |
| concentration in solid solution (%) | 3      | 6         | 9    |           | 12    |           | 15    |           | 18    |           | 21    |           |       |
| number of atoms                     | 2      | 4         | 6    |           | 8     |           | 10    |           | 12    |           | 13    |           |       |
| -25154.13                           | -0.75  | -25118.38 | 2.32 | -25078.07 | 9.94  | -25042.25 | 13.08 | -25003.97 | 18.68 | -24966.98 | 22.99 | -24930.59 | 43.04 |
| -25154.64                           | -1.26  | -25116.81 | 3.89 | -25073.58 | 14.43 | -25041.19 | 14.14 | -25005.75 | 16.91 | -24969.05 | 20.92 | -24933.07 | 40.55 |
| -25153.42                           | -0.04  | -25116.41 | 4.28 | -25080.04 | 7.97  | -25043.71 | 11.62 | -25004.38 | 18.28 | -24968.24 | 21.73 | -24932.27 | 41.36 |
| -25153.05                           | 0.33   | -25116.39 | 4.31 | -25077.56 | 10.46 | -25042.18 | 13.16 | -25006.19 | 16.47 | -24964.88 | 25.09 | -24931.37 | 42.26 |
| -25153.23                           | 0.15   | -25116.24 | 4.46 | -25079.08 | 8.94  | -25043.18 | 12.15 | -25004.10 | 18.55 | -24968.93 | 21.04 | -24933.21 | 40.42 |
| -25154.41                           | -1.03  | -25117.41 | 3.29 | -25080.11 | 7.90  | -25042.38 | 12.95 | -25005.27 | 17.38 | -24968.29 | 21.68 | -24924.83 | 48.80 |
| -25154.50                           | -1.12  | -25116.54 | 4.16 | -25077.53 | 10.49 | -25043.57 | 11.77 | -25008.73 | 13.92 | -24965.79 | 24.18 | -24925.72 | 47.91 |
| -25153.72                           | -0.34  | -25118.08 | 2.62 | -25078.49 | 9.53  | -25036.24 | 19.09 | -25005.38 | 17.28 | -24968.62 | 21.35 | -24933.60 | 40.03 |
| -25154.18                           | -0.80  | -25116.82 | 3.88 | -25078.29 | 9.73  | -25040.93 | 14.40 | -25000.35 | 22.30 | -24968.31 | 21.66 | -24927.95 | 45.68 |
| -25153.74                           | -0.36  | -25118.97 | 1.72 | -25079.79 | 8.23  | -25040.60 | 14.73 | -25006.43 | 16.22 | -24966.44 | 23.53 | -24931.12 | 42.51 |
| -25154.06                           | -0.68  | -25116.68 | 4.01 | -25079.65 | 8.37  | -25042.10 | 13.23 | -25006.55 | 16.11 | -24969.98 | 19.98 | -24929.86 | 43.77 |
| -25154.04                           | -0.66  | -25116.26 | 4.44 | -25077.31 | 10.70 | -25041.07 | 14.27 | -24998.35 | 24.31 | -24969.69 | 20.28 | -24929.80 | 43.83 |
| -25153.24                           | 0.14   | -25116.62 | 4.08 | -25080.17 | 7.85  | -25040.30 | 15.03 | -25006.69 | 15.96 | -24964.39 | 25.58 | -24934.14 | 39.49 |
| -25154.87                           | -1.49  | -25115.05 | 5.64 | -25079.81 | 8.20  | -25043.92 | 11.41 | -25005.21 | 17.44 | -24963.62 | 26.35 | -24931.15 | 42.48 |
| -25154.09                           | -0.71  | -25115.71 | 4.99 | -25077.46 | 10.56 | -25040.79 | 14.54 | -25007.20 | 15.45 | -24968.47 | 21.50 | -24930.19 | 43.44 |
| -25153.89                           | -0.51  | -25117.99 | 2.71 | -25079.92 | 8.09  | -25043.01 | 12.33 | -25003.46 | 19.19 | -24970.36 | 19.61 | -24931.21 | 42.42 |
| -25154.32                           | -0.95  | -25116.05 | 4.65 | -25078.79 | 9.22  | -25043.77 | 11.56 | -25000.31 | 22.34 | -24966.24 | 23.73 | -24930.19 | 43.43 |
| -25151.80                           | 1.58   | -25115.57 | 5.12 | -25080.24 | 7.78  | -25041.50 | 13.83 | -25003.06 | 19.59 | -24966.92 | 23.05 | -24931.45 | 42.18 |
| -25153.72                           | -0.34  | -25117.32 | 3.38 | -25080.64 | 7.38  | -25040.11 | 15.22 | -25001.94 | 20.71 | -24966.75 | 23.22 | -24933.25 | 40.38 |
| -25153.54                           | -0.16  | -25116.31 | 4.39 | -25081.41 | 6.60  | -25042.57 | 12.76 | -25001.94 | 20.72 | -24968.21 | 21.76 | -24928.83 | 44.80 |
| -25153.82                           | -0.44  | -25117.74 | 2.95 | -25079.35 | 8.67  | -25041.51 | 13.82 | -25005.77 | 16.88 | -24966.06 | 23.91 | -24931.01 | 42.62 |
| -25152.36                           | 1.02   | -25116.58 | 4.12 | -25081.11 | 6.91  | -25042.41 | 12.92 | -25004.17 | 18.48 | -24968.90 | 21.07 | -24933.87 | 39.76 |
| -25153.94                           | -0.56  | -25118.33 | 2.37 | -25081.11 | 6.90  | -25041.96 | 13.37 | -25005.32 | 17.33 | -24969.63 | 20.34 | -24928.44 | 45.18 |
| -25151.80                           | 1.58   | -25117.40 | 3.30 | -25079.11 | 8.91  | -25041.30 | 14.03 | -25004.82 | 17.83 | -24969.18 | 20.79 | -24934.14 | 39.49 |
| -25153.73                           | -0.35  | -25116.92 | 3.78 | -25077.39 | 10.62 | -25044.71 | 10.62 | -25004.61 | 18.04 | -24965.02 | 24.95 | -24932.88 | 40.75 |
| -25154.40                           | -1.02  | -25118.42 | 2.28 | -25080.48 | 7.53  | -25040.29 | 15.04 | -25001.70 | 20.95 | -24963.31 | 26.66 | -24933.76 | 39.87 |
| -25154.12                           | -0.74  | -25116.78 | 3.91 | -25078.33 | 9.69  | -25041.31 | 14.03 | -25006.47 | 16.18 | -24961.32 | 28.65 | -24930.69 | 42.94 |
| -25153.46                           | -0.08  | -25117.45 | 3.24 | -25080.35 | 7.66  | -25043.91 | 11.42 | -25005.58 | 17.08 | -24967.59 | 22.38 | -24934.80 | 38.83 |
| -25154.68                           | -1.30  | -25117.21 | 3.49 | -25079.71 | 8.30  | -25040.68 | 14.66 | -25006.15 | 16.50 | -24969.21 | 20.76 | -24931.78 | 41.85 |

|           |       |           |      |           |       |           |       |           |       |           |        |           |       |
|-----------|-------|-----------|------|-----------|-------|-----------|-------|-----------|-------|-----------|--------|-----------|-------|
| -25154.20 | -0.82 | -25117.23 | 3.47 | -25078.06 | 9.96  | -25043.42 | 11.92 | -25006.39 | 16.26 | -24963.37 | 26.60  | -24927.23 | 46.39 |
| -25154.06 | -0.68 | -25116.81 | 3.89 | -25078.29 | 9.73  | -25043.39 | 11.94 | -25008.41 | 14.24 | -24972.04 | 17.93  | -24934.15 | 39.48 |
| -25154.04 | -0.66 | -25117.19 | 3.51 | -25079.38 | 8.64  | -25043.95 | 11.38 | -25001.78 | 20.87 | -24966.97 | 23.00  | -24928.31 | 45.32 |
| -25152.60 | 0.78  | -25116.40 | 4.30 | -25080.66 | 7.36  | -25045.06 | 10.28 | -25005.90 | 16.75 | -24968.95 | 21.02  | -24928.44 | 45.19 |
| -25153.66 | -0.28 | -25117.17 | 3.53 | -25078.79 | 9.23  | -25041.39 | 13.94 | -25006.78 | 15.87 | -24968.89 | 21.08  | -24932.41 | 41.22 |
| -25154.55 | -1.17 | -25118.41 | 2.29 | -25077.70 | 10.32 | -25044.29 | 11.05 | -25006.04 | 16.61 | -25008.58 | -18.61 | -24932.01 | 41.62 |
| -25153.86 | -0.48 | -25117.11 | 3.59 | -25079.39 | 8.62  | -25040.50 | 14.83 | -25006.03 | 16.63 | -24964.52 | 25.45  | -24931.15 | 42.48 |
| -25154.70 | -1.32 | -25117.12 | 3.57 | -25081.56 | 6.45  | -25043.29 | 12.04 | -25005.27 | 17.38 | -24970.27 | 19.70  | -24931.76 | 41.87 |
| -25153.33 | 0.05  | -25116.06 | 4.64 | -25079.02 | 8.99  | -25038.23 | 17.11 | -25007.34 | 15.31 | -24969.52 | 20.45  | -24931.02 | 42.61 |
| -25154.34 | -0.96 | -25116.02 | 4.68 | -25080.49 | 7.53  | -25043.79 | 11.54 | -25006.22 | 16.43 | -24966.29 | 23.68  | -24927.15 | 46.48 |
| -25154.30 | -0.92 | -25116.96 | 3.73 | -25080.03 | 7.99  | -25039.46 | 15.87 | -25003.13 | 19.52 | -24968.38 | 21.59  | -24929.70 | 43.92 |
| -25154.95 | -1.57 | -25116.86 | 3.83 | -25080.90 | 7.12  | -25044.77 | 10.57 | -25004.23 | 18.42 | -24967.09 | 22.88  | -24934.86 | 38.77 |
| -25154.72 | -1.34 | -25116.30 | 4.40 | -25080.42 | 7.60  | -25040.88 | 14.45 | -25002.75 | 19.90 | -24970.95 | 19.02  | -24930.66 | 42.97 |
| -25154.09 | -0.71 | -25115.41 | 5.29 | -25077.72 | 10.30 | -25044.01 | 11.32 | -25006.17 | 16.48 | -24969.02 | 20.95  | -24925.49 | 48.14 |
| -25154.80 | -1.42 | -25115.37 | 5.33 | -25081.32 | 6.70  | -25044.19 | 11.15 | -25005.69 | 16.96 | -24968.76 | 21.21  | -24922.35 | 51.28 |
| -25153.80 | -0.42 | -25117.72 | 2.98 | -25079.90 | 8.12  | -25040.31 | 15.02 | -25004.56 | 18.10 | -24965.73 | 24.24  | -24927.40 | 46.23 |
| -25154.64 | -1.26 | -25115.57 | 5.13 | -25079.75 | 8.26  | -25040.62 | 14.71 | -25009.35 | 13.30 | -24969.78 | 20.19  | -24929.72 | 43.90 |
| -25154.18 | -0.80 | -25116.40 | 4.30 | -25077.90 | 10.12 | -25044.56 | 10.77 | -25004.93 | 17.72 | -24966.31 | 23.66  | -24928.56 | 45.07 |
| -25153.05 | 0.33  | -25117.35 | 3.34 | -25078.79 | 9.22  | -25043.35 | 11.98 | -25007.20 | 15.45 | -24966.45 | 23.52  | -24933.25 | 40.37 |
| -25154.03 | -0.65 | -25116.49 | 4.20 | -25078.95 | 9.06  | -25042.54 | 12.80 | -25004.12 | 18.53 | -24968.25 | 21.72  | -24933.34 | 40.29 |
| -25153.80 | -0.42 | -25117.56 | 3.13 | -25078.44 | 9.57  | -25043.38 | 11.95 | -25007.31 | 15.34 | -24970.56 | 19.41  | -24931.53 | 42.10 |
| -25153.79 | -0.41 | -25115.91 | 4.78 | -25080.69 | 7.33  | -25039.22 | 16.12 | -25004.85 | 17.81 | -24966.77 | 23.19  | -24929.12 | 44.50 |
| -25152.93 | 0.45  | -25116.76 | 3.94 | -25079.97 | 8.04  | -25042.63 | 12.70 | -25004.47 | 18.18 | -24971.00 | 18.97  | -24930.69 | 42.94 |
| -25153.92 | -0.54 | -25117.91 | 2.79 | -25078.79 | 9.22  | -25041.96 | 13.37 | -25004.18 | 18.47 | -24961.91 | 28.05  | -24928.88 | 44.74 |
| -25154.99 | -1.61 | -25116.75 | 3.95 | -25077.61 | 10.41 | -25040.80 | 14.53 | -25007.55 | 15.10 | -24966.94 | 23.03  | -24932.42 | 41.21 |
| -25152.98 | 0.40  | -25117.70 | 3.00 | -25078.88 | 9.14  | -25043.19 | 12.14 | -25002.96 | 19.69 | -24963.73 | 26.23  | -24929.78 | 43.84 |
| -25153.42 | -0.04 | -25116.63 | 4.06 | -25077.59 | 10.42 | -25043.58 | 11.75 | -24999.34 | 23.31 | -24968.35 | 21.62  | -24931.53 | 42.09 |
| -25153.86 | -0.48 | -25115.72 | 4.98 | -25077.84 | 10.17 | -25043.53 | 11.81 | -25007.52 | 15.13 | -24965.37 | 24.60  | -24925.02 | 48.61 |
| -25153.22 | 0.16  | -25119.08 | 1.62 | -25079.53 | 8.49  | -25040.04 | 15.29 | -25007.57 | 15.08 | -24965.14 | 24.83  | -24931.51 | 42.12 |
| -25153.49 | -0.12 | -25116.78 | 3.92 | -25078.08 | 9.94  | -25040.44 | 14.90 | -25004.86 | 17.79 | -24963.88 | 26.09  | -24928.37 | 45.26 |
| -25152.73 | 0.65  | -25115.88 | 4.81 | -25081.21 | 6.80  | -25040.26 | 15.07 | -25001.91 | 20.74 | -24968.69 | 21.28  | -24932.22 | 41.40 |
| -25154.45 | -1.07 | -25116.93 | 3.76 | -25078.81 | 9.20  | -25041.11 | 14.23 | -25003.77 | 18.88 | -24961.25 | 28.72  | -24933.23 | 40.40 |
| -25154.93 | -1.55 | -25116.02 | 4.68 | -25077.57 | 10.44 | -25045.12 | 10.21 | -25001.91 | 20.74 | -24964.36 | 25.61  | -24929.61 | 44.02 |
| -25154.81 | -1.43 | -25115.94 | 4.76 | -25078.50 | 9.51  | -25042.23 | 13.11 | -25001.27 | 21.38 | -24969.61 | 20.36  | -24928.61 | 45.02 |
| -25154.00 | -0.62 | -25116.75 | 3.95 | -25078.99 | 9.02  | -25043.02 | 12.31 | -25002.61 | 20.04 | -24966.12 | 23.85  | -24927.14 | 46.49 |
| -25153.39 | -0.01 | -25117.60 | 3.10 | -25081.32 | 6.69  | -25041.55 | 13.79 | -25007.16 | 15.50 | -24968.93 | 21.04  | -24933.08 | 40.55 |
| -25154.73 | -1.36 | -25116.52 | 4.18 | -25079.81 | 8.21  | -25043.19 | 12.14 | -25004.45 | 18.20 | -24965.27 | 24.70  | -24933.50 | 40.12 |
| -25152.81 | 0.57  | -25116.04 | 4.66 | -25079.77 | 8.24  | -25041.92 | 13.41 | -25002.57 | 20.08 | -24969.13 | 20.84  | -24932.78 | 40.85 |
| -25154.18 | -0.80 | -25118.08 | 2.62 | -25079.42 | 8.60  | -25042.65 | 12.69 | -25004.40 | 18.25 | -24966.55 | 23.42  | -24929.95 | 43.68 |
| -25153.43 | -0.05 | -25116.67 | 4.03 | -25080.52 | 7.49  | -25038.70 | 16.63 | -25003.51 | 19.14 | -24963.60 | 26.37  | -24932.36 | 41.26 |
| -25153.71 | -0.33 | -25117.07 | 3.63 | -25080.07 | 7.94  | -25039.69 | 15.65 | -25003.60 | 19.06 | -24968.36 | 21.61  | -24932.21 | 41.42 |

|           |       |           |      |           |       |           |       |           |       |           |       |           |       |
|-----------|-------|-----------|------|-----------|-------|-----------|-------|-----------|-------|-----------|-------|-----------|-------|
| -25153.19 | 0.19  | -25115.67 | 5.02 | -25079.92 | 8.09  | -25042.58 | 12.75 | -25002.81 | 19.84 | -24970.38 | 19.59 | -24931.43 | 42.20 |
| -25154.29 | -0.91 | -25117.94 | 2.75 | -25078.51 | 9.50  | -25042.14 | 13.20 | -25004.35 | 18.30 | -24967.70 | 22.27 | -24931.19 | 42.44 |
| -25154.69 | -1.31 | -25117.51 | 3.19 | -25079.47 | 8.55  | -25041.44 | 13.90 | -25006.82 | 15.83 | -24967.40 | 22.57 | -24927.39 | 46.23 |
| -25152.11 | 1.27  | -25116.75 | 3.94 | -25079.21 | 8.81  | -25040.65 | 14.68 | -25007.46 | 15.19 | -24966.72 | 23.25 | -24932.05 | 41.58 |
| -25153.92 | -0.54 | -25115.17 | 5.53 | -25078.91 | 9.10  | -25039.12 | 16.22 | -25005.29 | 17.36 | -24964.27 | 25.70 | -24932.71 | 40.92 |
| -25152.73 | 0.65  | -25117.95 | 2.75 | -25078.26 | 9.76  | -25042.59 | 12.75 | -25003.28 | 19.37 | -24969.40 | 20.57 | -24929.40 | 44.23 |
| -25151.63 | 1.75  | -25116.84 | 3.85 | -25080.46 | 7.55  | -25041.91 | 13.42 | -25007.24 | 15.41 | -24969.33 | 20.64 | -24931.81 | 41.82 |
| -25154.41 | -1.03 | -25115.31 | 5.39 | -25076.19 | 11.82 | -25040.34 | 14.99 | -25004.80 | 17.86 | -24966.74 | 23.23 | -24933.25 | 40.37 |
| -25154.79 | -1.41 | -25118.06 | 2.63 | -25081.37 | 6.65  | -25043.40 | 11.94 | -25005.73 | 16.92 | -24966.84 | 23.13 | -24932.84 | 40.79 |
| -25154.14 | -0.76 | -25118.54 | 2.15 | -25080.03 | 7.98  | -25038.47 | 16.86 | -25003.92 | 18.73 | -24962.07 | 27.90 | -24924.24 | 49.39 |
| -25153.99 | -0.61 | -25116.87 | 3.83 | -25076.48 | 11.54 | -25043.19 | 12.14 | -25005.42 | 17.23 | -24971.15 | 18.81 | -24926.96 | 46.67 |
| -25153.41 | -0.03 | -25117.93 | 2.77 | -25080.90 | 7.12  | -25037.91 | 17.43 | -25004.50 | 18.16 | -24970.41 | 19.56 | -24934.94 | 38.69 |
| -25154.80 | -1.42 | -25115.72 | 4.97 | -25079.46 | 8.56  | -25039.98 | 15.35 | -25006.88 | 15.77 | -24969.81 | 20.16 | -24932.46 | 41.17 |
| -25153.58 | -0.20 | -25117.72 | 2.97 | -25080.01 | 8.00  | -25045.35 | 9.98  | -25007.77 | 14.88 | -24971.21 | 18.76 | -24930.05 | 43.57 |
| -25155.04 | -1.66 | -25118.39 | 2.31 | -25079.30 | 8.71  | -25037.78 | 17.55 | -25004.21 | 18.45 | -24968.80 | 21.17 | -24932.81 | 40.82 |
| -25154.64 | -1.26 | -25114.16 | 6.53 | -25081.77 | 6.25  | -25042.75 | 12.58 | -25005.23 | 17.42 | -24971.11 | 18.86 | -24931.56 | 42.07 |
| -25153.09 | 0.29  | -25117.58 | 3.11 | -25079.94 | 8.07  | -25040.87 | 14.46 | -25007.45 | 15.21 | -24965.59 | 24.38 | -24928.97 | 44.66 |
| -25154.03 | -0.65 | -25115.52 | 5.18 | -25080.06 | 7.95  | -25040.57 | 14.76 | -25002.97 | 19.68 | -24970.80 | 19.17 | -24934.29 | 39.33 |
| -25152.88 | 0.50  | -25115.89 | 4.80 | -25077.46 | 10.56 | -25039.29 | 16.04 | -25003.79 | 18.86 | -24968.10 | 21.87 | -24930.71 | 42.92 |
| -25153.24 | 0.14  | -25118.11 | 2.59 | -25077.82 | 10.19 | -25043.57 | 11.76 | -25005.32 | 17.33 | -24965.20 | 24.77 | -24926.62 | 47.01 |
| -25154.17 | -0.79 | -25115.85 | 4.85 | -25080.50 | 7.51  | -25041.57 | 13.77 | -25004.38 | 18.28 | -24970.55 | 19.42 | -24931.86 | 41.77 |
| -25153.91 | -0.53 | -25116.30 | 4.39 | -25075.55 | 12.47 | -25043.45 | 11.88 | -25005.63 | 17.02 | -24966.52 | 23.45 | -24932.74 | 40.89 |
| -25153.51 | -0.13 | -25115.83 | 4.86 | -25081.07 | 6.94  | -25041.55 | 13.78 | -25005.93 | 16.72 | -24966.36 | 23.61 | -24929.09 | 44.54 |
| -25153.62 | -0.24 | -25113.82 | 6.88 | -25080.45 | 7.57  | -25042.64 | 12.70 | -25007.25 | 15.40 | -24966.37 | 23.60 | -24932.05 | 41.58 |
| -25154.33 | -0.95 | -25115.63 | 5.07 | -25080.08 | 7.93  | -25041.95 | 13.38 | -25003.76 | 18.89 | -24969.03 | 20.93 | -24934.24 | 39.39 |
| -25154.68 | -1.30 | -25117.82 | 2.87 | -25078.05 | 9.97  | -25044.30 | 11.03 | -25006.19 | 16.46 | -24965.86 | 24.11 | -24925.66 | 47.97 |
| -25154.05 | -0.67 | -25117.55 | 3.15 | -25078.59 | 9.43  | -25041.42 | 13.92 | -24997.32 | 25.34 | -24967.10 | 22.87 | -24934.24 | 39.39 |
| -25153.82 | -0.44 | -25117.65 | 3.04 | -25078.85 | 9.16  | -25042.63 | 12.71 | -25001.62 | 21.03 | -24961.63 | 28.34 | -24934.99 | 38.64 |
| -25153.20 | 0.18  | -25118.68 | 2.01 | -25080.82 | 7.19  | -25042.57 | 12.76 | -25001.58 | 21.07 | -24969.70 | 20.27 | -24925.31 | 48.32 |
| -25154.34 | -0.96 | -25115.85 | 4.85 | -25079.26 | 8.76  | -25042.08 | 13.25 | -25006.41 | 16.24 | -24966.69 | 23.28 | -24929.95 | 43.67 |
| -25152.59 | 0.79  | -25116.11 | 4.58 | -25076.40 | 11.62 | -25040.32 | 15.02 | -25003.74 | 18.91 | -24966.26 | 23.70 | -24929.78 | 43.85 |
| -25153.49 | -0.11 | -25117.08 | 3.62 | -25077.75 | 10.27 | -25040.12 | 15.22 | -25002.93 | 19.72 | -24969.53 | 20.44 | -24927.87 | 45.76 |
| -25152.47 | 0.91  | -25115.86 | 4.84 | -25081.89 | 6.13  | -25043.41 | 11.93 | -25006.01 | 16.64 | -24967.14 | 22.83 | -24932.06 | 41.57 |
| -25153.77 | -0.39 | -25114.62 | 6.07 | -25076.52 | 11.50 | -25039.29 | 16.04 | -25004.43 | 18.23 | -24971.36 | 18.61 | -24932.63 | 41.00 |
| -25154.36 | -0.98 | -25116.35 | 4.35 | -25077.82 | 10.19 | -25041.73 | 13.60 | -25005.82 | 16.83 | -24967.57 | 22.40 | -24932.29 | 41.34 |
| -25152.48 | 0.90  | -25117.94 | 2.76 | -25080.39 | 7.63  | -25041.24 | 14.10 | -25006.22 | 16.43 | -24965.68 | 24.29 | -24933.97 | 39.66 |
| -25154.41 | -1.03 | -25117.19 | 3.50 | -25080.42 | 7.60  | -25042.97 | 12.36 | -25007.45 | 15.20 | -24969.39 | 20.58 | -24932.33 | 41.29 |
| -25153.63 | -0.25 | -25119.32 | 1.38 | -25078.08 | 9.94  | -25038.60 | 16.73 | -25001.36 | 21.29 | -24970.58 | 19.39 | -24931.89 | 41.74 |
| -25154.57 | -1.19 | -25116.77 | 3.92 | -25077.82 | 10.19 | -25039.33 | 16.00 | -25003.03 | 19.62 | -24966.69 | 23.27 | -24930.50 | 43.13 |
| -25154.59 | -1.21 | -25116.15 | 4.55 | -25079.05 | 8.96  | -25041.45 | 13.88 | -25005.57 | 17.08 |           |       | -24932.56 | 41.06 |
| -25154.01 | -0.63 | -25115.89 | 4.80 | -25080.57 | 7.45  | -25036.78 | 18.55 | -25001.77 | 20.88 |           |       | -24929.20 | 44.43 |

|           |       |           |      |           |       |           |       |           |       |           |       |
|-----------|-------|-----------|------|-----------|-------|-----------|-------|-----------|-------|-----------|-------|
| -25154.38 | -1.00 | -25115.71 | 4.99 | -25077.91 | 10.11 | -25043.07 | 12.26 | -25007.14 | 15.51 | -24925.83 | 47.79 |
| -25154.58 | -1.20 |           |      | -25076.83 | 11.19 | -25039.64 | 15.70 |           |       | -24933.25 | 40.38 |
| -25153.57 | -0.19 |           |      | -25081.51 | 6.51  | -25042.29 | 13.05 |           |       | -24932.90 | 40.73 |
| -25152.82 | 0.56  |           |      | -25079.59 | 8.43  | -25042.48 | 12.85 |           |       |           |       |
| -25153.71 | -0.33 |           |      | -25079.47 | 8.55  | -25042.33 | 13.00 |           |       |           |       |
| -25153.54 | -0.16 |           |      | -25078.46 | 9.56  | -25038.61 | 16.73 |           |       |           |       |
| -25154.24 | -0.86 |           |      |           |       | -25041.97 | 13.36 |           |       |           |       |
| -25153.93 | -0.55 |           |      |           |       | -25043.27 | 12.07 |           |       |           |       |
| -25153.36 | 0.02  |           |      |           |       |           |       |           |       |           |       |

Average energies      -25153.83      -0.45      -25116.81      3.89      -25079.20      8.81      -25041.77      13.56      -25004.74      17.91      -24967.83      22.14      -24930.79      42.83

ground      solid  
state      solution  
energy      energy

## Pu

concentration in solid solution (%)  
number of atoms

|           | 3     | 6         | 9    | 12        | 15    | 18        | 21    |           |       |           |       |           |       |
|-----------|-------|-----------|------|-----------|-------|-----------|-------|-----------|-------|-----------|-------|-----------|-------|
|           | 2     | 4         | 6    | 8         | 10    | 12        | 13    |           |       |           |       |           |       |
| -25148.40 | -1.00 | -25105.45 | 3.27 | -25063.86 | 6.20  | -25023.07 | 8.32  | -24970.49 | 22.23 | -24934.39 | 19.67 | -24913.57 | 21.16 |
| -25148.87 | -1.48 | -25105.26 | 3.47 | -25058.54 | 11.51 | -25019.39 | 12.00 | -24978.30 | 14.43 | -24934.77 | 19.29 | -24910.44 | 24.28 |
| -25148.85 | -1.46 | -25105.22 | 3.51 | -25062.61 | 7.45  | -25022.59 | 8.80  | -24977.33 | 15.39 | -24935.14 | 18.92 | -24912.06 | 22.66 |
| -25146.92 | 0.47  | -25105.36 | 3.37 | -25060.82 | 9.23  | -25021.61 | 9.78  | -24973.94 | 18.78 | -24937.04 | 17.01 | -24913.46 | 21.26 |
| -25148.19 | -0.80 | -25104.52 | 4.21 | -25062.18 | 7.87  | -25018.39 | 13.00 | -24978.93 | 13.80 | -24932.82 | 21.24 | -24914.29 | 20.44 |
| -25148.24 | -0.85 | -25108.17 | 0.56 | -25061.47 | 8.59  | -25023.15 | 8.25  | -24976.24 | 16.48 | -24934.24 | 19.81 | -24913.50 | 21.22 |
| -25147.94 | -0.55 | -25104.77 | 3.96 | -25062.87 | 7.19  | -25016.45 | 14.94 | -24976.56 | 16.16 | -24937.12 | 16.94 | -24912.42 | 22.31 |
| -25148.07 | -0.68 | -25106.42 | 2.31 | -25061.00 | 9.06  | -25021.83 | 9.56  | -24975.08 | 17.65 | -24931.94 | 22.12 | -24916.50 | 18.23 |
| -25148.06 | -0.67 | -25105.13 | 3.60 | -25063.68 | 6.38  | -25016.66 | 14.73 | -24978.69 | 14.04 | -24934.81 | 19.24 | -24910.29 | 24.44 |
| -25147.69 | -0.30 | -25106.36 | 2.36 | -25059.00 | 11.06 | -25019.91 | 11.48 | -24973.82 | 18.91 | -24934.84 | 19.21 | -24910.45 | 24.27 |
| -25149.21 | -1.82 | -25103.32 | 5.41 | -25063.88 | 6.17  | -25018.95 | 12.44 | -24973.66 | 19.06 | -24934.48 | 19.57 | -24910.93 | 23.79 |
| -25147.66 | -0.27 | -25104.84 | 3.89 | -25062.63 | 7.43  | -25020.93 | 10.46 | -24976.91 | 15.82 | -24929.47 | 24.58 | -24915.65 | 19.07 |
| -25147.31 | 0.09  | -25104.38 | 4.34 | -25061.82 | 8.23  | -25022.63 | 8.77  | -24979.62 | 13.10 | -24932.84 | 21.22 | -24912.17 | 22.56 |
| -25150.23 | -2.84 | -25104.15 | 4.58 | -25061.28 | 8.78  | -25022.69 | 8.71  | -24977.98 | 14.74 | -24932.67 | 21.38 | -24914.48 | 20.24 |
| -25148.16 | -0.76 | -25106.50 | 2.23 | -25062.06 | 7.99  | -25021.23 | 10.16 | -24978.06 | 14.67 | -24936.82 | 17.24 | -24909.41 | 25.31 |
| -25148.03 | -0.64 | -25106.60 | 2.13 | -25062.61 | 7.45  | -25018.28 | 13.11 | -24977.16 | 15.57 | -24936.97 | 17.09 | -24917.23 | 17.49 |
| -25149.04 | -1.65 | -25104.62 | 4.10 | -25061.50 | 8.55  | -25020.90 | 10.49 | -24977.82 | 14.91 | -24936.42 | 17.64 | -24912.04 | 22.68 |
| -25147.41 | -0.02 | -25105.76 | 2.96 | -25063.75 | 6.31  | -25020.21 | 11.18 | -24978.24 | 14.48 | -24933.25 | 20.80 | -24908.46 | 26.26 |
| -25147.88 | -0.48 | -25106.64 | 2.09 | -25065.50 | 4.56  | -25019.09 | 12.30 | -24975.11 | 17.61 | -24935.44 | 18.62 | -24912.71 | 22.01 |
| -25149.49 | -2.09 | -25105.10 | 3.63 | -25061.33 | 8.73  | -25017.54 | 13.85 | -24975.58 | 17.15 | -24934.52 | 19.54 | -24913.33 | 21.39 |
| -25148.15 | -0.75 | -25106.69 | 2.04 | -25062.30 | 7.76  | -25016.91 | 14.48 | -24976.16 | 16.57 | -24932.65 | 21.41 | -24916.51 | 18.21 |
| -25148.62 | -1.23 | -25104.79 | 3.94 | -25063.08 | 6.98  | -25020.54 | 10.85 | -24974.77 | 17.95 | -24935.32 | 18.74 | -24912.63 | 22.09 |
| -25149.24 | -1.85 | -25106.87 | 1.86 | -25062.81 | 7.25  | -25021.74 | 9.65  | -24979.40 | 13.32 | -24938.79 | 15.27 | -24914.24 | 20.49 |

|           |       |           |      |           |       |           |       |           |       |           |       |           |       |
|-----------|-------|-----------|------|-----------|-------|-----------|-------|-----------|-------|-----------|-------|-----------|-------|
| -25148.38 | -0.99 | -25105.27 | 3.45 | -25060.49 | 9.56  | -25019.01 | 12.38 | -24978.69 | 14.04 | -24935.53 | 18.53 | -24912.22 | 22.50 |
| -25148.82 | -1.42 | -25103.18 | 5.55 | -25063.26 | 6.80  | -25018.19 | 13.20 | -24978.70 | 14.02 | -24936.44 | 17.62 | -24912.77 | 21.95 |
| -25147.49 | -0.09 | -25105.53 | 3.20 | -25062.66 | 7.40  | -25021.60 | 9.79  | -24978.53 | 14.20 | -24937.33 | 16.72 | -24914.59 | 20.14 |
| -25148.07 | -0.67 | -25104.03 | 4.70 | -25059.75 | 10.30 | -25023.08 | 8.31  | -24975.26 | 17.46 | -24938.00 | 16.05 | -24911.89 | 22.83 |
| -25148.21 | -0.82 | -25105.53 | 3.20 | -25062.98 | 7.07  | -25020.00 | 11.40 | -24973.53 | 19.19 | -24936.31 | 17.75 | -24916.17 | 18.55 |
| -25147.89 | -0.50 | -25107.26 | 1.47 | -25062.22 | 7.84  | -25013.49 | 17.90 | -24978.68 | 14.04 | -24938.52 | 15.53 | -24911.74 | 22.98 |
| -25149.10 | -1.71 | -25102.38 | 6.35 | -25061.85 | 8.21  | -25019.24 | 12.15 | -24980.61 | 12.11 | -24932.50 | 21.56 | -24913.63 | 21.10 |
| -25148.19 | -0.80 | -25104.71 | 4.01 | -25064.52 | 5.54  | -25021.31 | 10.08 | -24979.05 | 13.67 | -24940.22 | 13.83 | -24915.31 | 19.41 |
| -25148.40 | -1.01 | -25105.77 | 2.96 | -25063.84 | 6.22  | -25017.30 | 14.09 | -24975.05 | 17.68 | -24938.49 | 15.57 | -24909.74 | 24.98 |
| -25149.35 | -1.96 | -25106.25 | 2.48 | -25060.61 | 9.45  | -25020.69 | 10.70 | -24976.16 | 16.57 | -24938.36 | 15.69 | -24916.24 | 18.49 |
| -25147.75 | -0.36 | -25104.11 | 4.61 | -25062.52 | 7.54  | -25021.81 | 9.58  | -24977.76 | 14.96 | -24934.13 | 19.92 | -24913.35 | 21.37 |
| -25147.84 | -0.44 | -25104.48 | 4.24 | -25061.50 | 8.55  | -25021.85 | 9.54  | -24978.07 | 14.65 | -24933.76 | 20.30 | -24908.95 | 25.77 |
| -25149.28 | -1.89 | -25105.53 | 3.20 | -25062.60 | 7.46  | -25018.91 | 12.48 | -24979.61 | 13.11 | -24938.07 | 15.98 | -24916.35 | 18.37 |
| -25149.59 | -2.19 | -25103.83 | 4.90 | -25061.90 | 8.16  | -25021.83 | 9.56  | -24976.42 | 16.30 | -24930.79 | 23.27 | -24910.54 | 24.18 |
| -25148.85 | -1.45 | -25106.44 | 2.29 | -25059.69 | 10.37 | -25018.70 | 12.69 | -24979.19 | 13.53 | -24934.61 | 19.44 | -24916.75 | 17.98 |
| -25149.18 | -1.78 | -25105.12 | 3.61 | -25060.25 | 9.81  | -25020.18 | 11.21 | -24978.02 | 14.71 | -24938.63 | 15.43 | -24915.04 | 19.68 |
| -25148.16 | -0.77 | -25107.34 | 1.39 | -25062.79 | 7.27  | -25021.42 | 9.97  | -24977.49 | 15.23 | -24935.99 | 18.07 | -24911.19 | 23.53 |
| -25148.57 | -1.18 | -25106.31 | 2.42 | -25063.50 | 6.55  | -25018.64 | 12.76 | -24978.19 | 14.53 | -24938.45 | 15.60 | -24917.08 | 17.65 |
| -25147.79 | -0.39 | -25105.62 | 3.10 | -25060.56 | 9.49  | -25018.68 | 12.71 | -24980.77 | 11.95 | -24931.16 | 22.90 | -24915.63 | 19.10 |
| -25147.03 | 0.37  | -25106.79 | 1.94 | -25061.58 | 8.47  | -25019.32 | 12.07 | -24974.41 | 18.31 | -24930.99 | 23.06 | -24916.35 | 18.37 |
| -25146.46 | 0.94  | -25101.89 | 6.83 | -25060.24 | 9.82  | -25017.04 | 14.36 | -24976.56 | 16.17 | -24932.95 | 21.11 | -24915.80 | 18.92 |
| -25149.33 | -1.93 | -25104.22 | 4.50 | -25062.08 | 7.98  | -25020.96 | 10.43 | -24970.24 | 22.49 | -24936.09 | 17.97 | -24915.83 | 18.89 |
| -25150.00 | -2.61 | -25105.53 | 3.19 | -25064.31 | 5.75  | -25020.03 | 11.36 | -24973.68 | 19.04 | -24935.06 | 19.00 | -24912.20 | 22.52 |
| -25149.97 | -2.58 | -25105.09 | 3.64 | -25065.35 | 4.70  | -25019.10 | 12.29 | -24978.59 | 14.14 | -24935.04 | 19.02 | -24915.16 | 19.57 |
| -25148.27 | -0.87 | -25102.29 | 6.44 | -25064.88 | 5.18  | -25019.06 | 12.33 | -24976.51 | 16.22 | -24938.20 | 15.86 | -24913.38 | 21.34 |
| -25148.67 | -1.28 | -25105.62 | 3.11 | -25063.79 | 6.27  | -25019.90 | 11.50 | -24979.28 | 13.44 | -24939.63 | 14.43 | -24914.57 | 20.15 |
| -25148.34 | -0.95 | -25105.27 | 3.46 | -25062.24 | 7.82  | -25017.13 | 14.26 | -24979.66 | 13.07 | -24936.29 | 17.77 | -24914.14 | 20.59 |
| -25148.44 | -1.05 | -25105.39 | 3.34 | -25063.47 | 6.59  | -25019.91 | 11.48 | -24977.41 | 15.31 | -24931.38 | 22.67 | -24913.87 | 20.85 |
| -25149.61 | -2.22 | -25104.99 | 3.74 | -25062.86 | 7.20  | -25020.30 | 11.09 | -24976.55 | 16.17 | -24933.84 | 20.21 | -24908.76 | 25.96 |
| -25146.66 | 0.73  | -25106.13 | 2.60 | -25060.97 | 9.09  | -25018.99 | 12.40 | -24975.10 | 17.62 | -24932.19 | 21.87 | -24909.83 | 24.90 |
| -25146.94 | 0.45  | -25106.46 | 2.27 | -25062.11 | 7.95  | -25018.46 | 12.94 | -24979.92 | 12.80 | -24934.95 | 19.11 | -24909.80 | 24.93 |
| -25148.75 | -1.35 | -25105.60 | 3.13 | -25063.74 | 6.31  | -25022.05 | 9.34  | -24976.79 | 15.94 | -24937.43 | 16.63 | -24916.74 | 17.98 |
| -25148.71 | -1.31 | -25104.79 | 3.94 | -25062.63 | 7.43  | -25020.65 | 10.74 | -24975.82 | 16.90 | -24937.92 | 16.13 | -24911.50 | 23.22 |
| -25148.55 | -1.16 | -25104.23 | 4.49 | -25064.60 | 5.46  | -25020.81 | 10.58 | -24975.24 | 17.49 | -24935.94 | 18.12 | -24917.89 | 16.83 |
| -25148.19 | -0.80 | -25105.62 | 3.10 | -25063.24 | 6.82  | -25018.83 | 12.56 | -24975.81 | 16.91 | -24936.02 | 18.04 | -24911.14 | 23.58 |
| -25148.97 | -1.58 | -25104.11 | 4.62 | -25061.53 | 8.53  | -25020.25 | 11.14 | -24979.46 | 13.27 | -24935.21 | 18.85 | -24912.96 | 21.77 |
| -25147.37 | 0.02  | -25104.92 | 3.80 | -25065.40 | 4.66  | -25016.16 | 15.23 | -24976.77 | 15.96 | -24935.48 | 18.58 | -24912.74 | 21.98 |
| -25149.05 | -1.66 | -25106.51 | 2.22 | -25063.62 | 6.44  | -25017.97 | 13.42 | -24976.47 | 16.26 | -24936.87 | 17.18 | -24917.30 | 17.42 |
| -25148.99 | -1.59 | -25105.58 | 3.15 | -25061.84 | 8.22  | -25019.55 | 11.84 | -24973.17 | 19.55 | -24932.64 | 21.42 | -24916.10 | 18.63 |
| -25147.90 | -0.50 | -25105.99 | 2.73 | -25064.14 | 5.92  | -25020.75 | 10.64 | -24974.53 | 18.20 | -24936.12 | 17.94 | -24911.73 | 22.99 |
| -25147.67 | -0.27 | -25105.35 | 3.38 | -25060.87 | 9.19  | -25018.42 | 12.97 | -24975.52 | 17.20 | -24938.19 | 15.87 | -24912.22 | 22.50 |

|           |       |           |      |           |       |           |       |           |       |           |       |           |       |
|-----------|-------|-----------|------|-----------|-------|-----------|-------|-----------|-------|-----------|-------|-----------|-------|
| -25148.81 | -1.41 | -25103.64 | 5.09 | -25061.91 | 8.15  | -25018.02 | 13.37 | -24979.06 | 13.66 | -24938.36 | 15.70 | -24913.18 | 21.54 |
| -25147.97 | -0.57 | -25105.39 | 3.34 | -25062.05 | 8.01  | -25017.57 | 13.82 | -24974.24 | 18.49 | -24934.63 | 19.42 | -24914.04 | 20.68 |
| -25149.11 | -1.71 | -25103.96 | 4.77 | -25061.99 | 8.07  | -25022.86 | 8.53  | -24976.11 | 16.61 | -24933.71 | 20.35 | -24914.61 | 20.11 |
| -25147.73 | -0.33 | -25106.29 | 2.44 | -25064.60 | 5.46  | -25019.85 | 11.54 | -24976.72 | 16.01 | -24936.82 | 17.24 | -24909.96 | 24.77 |
| -25148.31 | -0.92 | -25106.06 | 2.66 | -25064.23 | 5.83  | -25018.23 | 13.16 | -24978.43 | 14.30 | -24935.45 | 18.61 | -24914.94 | 19.79 |
| -25147.37 | 0.02  | -25104.96 | 3.77 | -25061.91 | 8.15  | -25019.10 | 12.29 | -24976.64 | 16.09 | -24933.23 | 20.83 | -24920.51 | 14.22 |
| -25148.65 | -1.26 | -25105.82 | 2.90 | -25064.99 | 5.07  | -25021.09 | 10.30 | -24977.83 | 14.90 | -24934.03 | 20.03 | -24914.75 | 19.97 |
| -25149.37 | -1.97 | -25106.27 | 2.45 | -25063.37 | 6.69  | -25020.53 | 10.87 | -24978.32 | 14.40 | -24935.33 | 18.73 | -24914.69 | 20.03 |
| -25148.17 | -0.78 | -25105.51 | 3.22 | -25063.73 | 6.33  | -25023.26 | 8.13  | -24975.40 | 17.33 | -24936.17 | 17.89 | -24908.14 | 26.58 |
| -25148.06 | -0.67 | -25104.79 | 3.93 | -25062.60 | 7.46  | -25022.52 | 8.87  | -24980.75 | 11.98 | -24937.26 | 16.80 | -24913.54 | 21.18 |
| -25148.73 | -1.33 | -25105.43 | 3.30 | -25061.96 | 8.10  | -25017.99 | 13.40 | -24979.32 | 13.40 | -24938.29 | 15.76 | -24911.76 | 22.96 |
| -25149.08 | -1.69 | -25106.88 | 1.85 | -25064.41 | 5.65  | -25016.92 | 14.47 | -24975.42 | 17.31 | -24935.82 | 18.24 | -24911.44 | 23.28 |
| -25147.82 | -0.42 | -25104.29 | 4.43 | -25061.61 | 8.45  | -25019.18 | 12.21 | -24976.07 | 16.66 | -24936.72 | 17.33 | -24916.52 | 18.20 |
| -25146.98 | 0.42  | -25105.21 | 3.51 | -25061.07 | 8.99  | -25020.15 | 11.24 | -24977.40 | 15.33 | -24930.53 | 23.52 | -24914.83 | 19.89 |
| -25149.09 | -1.69 | -25106.44 | 2.29 | -25060.12 | 9.94  | -25020.25 | 11.15 | -24975.13 | 17.59 | -24935.33 | 18.72 | -24916.30 | 18.42 |
| -25146.78 | 0.62  | -25105.12 | 3.61 | -25060.84 | 9.21  | -25019.36 | 12.04 | -24977.94 | 14.78 | -24935.11 | 18.94 | -24912.23 | 22.49 |
| -25149.68 | -2.29 | -25107.13 | 1.59 | -25061.00 | 9.06  | -25021.10 | 10.29 | -24974.34 | 18.38 | -24933.48 | 20.58 | -24911.22 | 23.50 |
| -25147.68 | -0.28 | -25104.16 | 4.56 | -25063.83 | 6.23  | -25020.84 | 10.55 | -24975.66 | 17.07 | -24931.80 | 22.25 | -24915.84 | 18.89 |
| -25147.96 | -0.57 | -25105.64 | 3.09 | -25062.17 | 7.89  | -25020.25 | 11.14 | -24977.73 | 14.99 | -24936.71 | 17.34 | -24910.10 | 24.62 |
| -25147.66 | -0.27 | -25105.09 | 3.64 | -25061.96 | 8.10  | -25018.06 | 13.33 | -24976.96 | 15.76 | -24937.42 | 16.64 | -24915.65 | 19.07 |
| -25149.20 | -1.80 | -25101.36 | 7.37 | -25061.47 | 8.59  | -25015.90 | 15.49 | -24978.90 | 13.82 | -24936.11 | 17.94 | -24912.83 | 21.89 |
| -25148.54 | -1.15 | -25105.23 | 3.50 | -25062.46 | 7.60  | -25020.38 | 11.01 | -24974.05 | 18.67 | -24934.44 | 19.62 | -24915.56 | 19.16 |
| -25149.76 | -2.37 | -25104.26 | 4.46 | -25064.47 | 5.59  | -25020.39 | 11.00 | -24980.38 | 12.35 | -24933.06 | 21.00 | -24914.05 | 20.67 |
| -25148.20 | -0.81 | -25105.69 | 3.04 | -25054.92 | 15.14 | -25018.93 | 12.46 | -24978.76 | 13.96 | -24935.68 | 18.38 | -24916.63 | 18.09 |
| -25147.86 | -0.47 | -25105.98 | 2.74 | -25061.78 | 8.27  | -25019.04 | 12.35 | -24976.53 | 16.20 | -24934.64 | 19.42 | -24914.33 | 20.39 |
| -25148.01 | -0.61 | -25106.91 | 1.82 | -25062.67 | 7.39  | -25021.42 | 9.97  | -24976.92 | 15.80 | -24933.01 | 21.05 | -24914.16 | 20.56 |
| -25149.36 | -1.96 | -25103.29 | 5.43 | -25062.43 | 7.63  | -25020.04 | 11.35 | -24978.58 | 14.14 | -24937.48 | 16.58 | -24914.33 | 20.40 |
| -25147.94 | -0.55 | -25106.39 | 2.34 | -25059.10 | 10.96 | -25015.27 | 16.12 | -24977.64 | 15.08 | -24937.47 | 16.58 | -24908.91 | 25.81 |
| -25148.85 | -1.46 | -25103.28 | 5.44 | -25062.62 | 7.44  | -25019.23 | 12.16 | -24977.01 | 15.72 | -24936.04 | 18.02 | -24910.83 | 23.89 |
| -25149.07 | -1.67 | -25107.02 | 1.71 | -25062.95 | 7.11  | -25019.17 | 12.22 | -24978.48 | 14.24 | -24936.62 | 17.43 | -24912.73 | 21.99 |
| -25149.82 | -2.42 | -25106.13 | 2.60 | -25061.48 | 8.57  | -25020.26 | 11.13 | -24974.31 | 18.42 | -24936.38 | 17.68 | -24913.55 | 21.17 |
| -25148.71 | -1.32 | -25103.18 | 5.54 | -25062.85 | 7.21  | -25021.13 | 10.26 | -24975.45 | 17.27 | -24932.80 | 21.26 | -24913.44 | 21.28 |
| -25147.50 | -0.10 | -25106.07 | 2.66 | -25061.89 | 8.17  | -25018.17 | 13.22 | -24980.88 | 11.84 | -24936.36 | 17.70 | -24915.73 | 19.00 |
| -25147.33 | 0.06  | -25101.23 | 7.50 | -25061.53 | 8.53  | -25020.12 | 11.27 | -24979.27 | 13.45 | -24933.10 | 20.95 | -24914.97 | 19.76 |
| -25148.24 | -0.85 | -25105.24 | 3.48 | -25061.61 | 8.45  | -25018.37 | 13.03 | -24976.86 | 15.87 | -24935.02 | 19.03 | -24916.29 | 18.43 |
| -25149.02 | -1.63 | -25105.47 | 3.26 | -25061.04 | 9.02  | -25020.54 | 10.85 | -24976.12 | 16.60 | -24932.80 | 21.26 | -24908.96 | 25.76 |
| -25147.77 | -0.38 | -25108.61 | 0.12 | -25061.19 | 8.87  | -25020.99 | 10.40 | -24976.93 | 15.80 | -24938.30 | 15.75 | -24914.54 | 20.18 |
| -25148.03 | -0.64 | -25105.71 | 3.01 | -25061.16 | 8.90  | -25020.71 | 10.68 | -24978.99 | 13.74 | -24939.67 | 14.39 | -24917.15 | 17.57 |
| -25148.20 | -0.81 | -25104.85 | 3.88 | -25062.18 | 7.87  | -25020.51 | 10.88 | -24974.57 | 18.16 | -24936.48 | 17.58 | -24913.46 | 21.26 |
| -25148.44 | -1.04 | -25105.24 | 3.49 | -25062.31 | 7.75  | -25020.26 | 11.13 | -24978.76 | 13.96 | -24935.74 | 18.31 | -24914.08 | 20.65 |
| -25147.06 | 0.34  | -25106.40 | 2.33 | -25063.55 | 6.51  | -25016.15 | 15.24 | -24976.58 | 16.15 | -24933.36 | 20.70 | -24914.75 | 19.97 |



|           |       |           |      |           |       |           |       |           |       |           |       |           |       |
|-----------|-------|-----------|------|-----------|-------|-----------|-------|-----------|-------|-----------|-------|-----------|-------|
| -25148.26 | -0.86 | -25104.12 | 4.61 | -25061.51 | 8.55  | -25020.36 | 11.03 | -24979.08 | 13.65 | -24932.19 | 21.87 | -24913.25 | 21.47 |
| -25146.88 | 0.52  | -25105.70 | 3.02 | -25056.37 | 13.69 | -25021.47 | 9.92  | -24977.88 | 14.84 | -24930.53 | 23.53 | -24914.78 | 19.95 |
| -25146.05 | 1.34  | -25104.40 | 4.33 | -25063.93 | 6.13  | -25018.09 | 13.30 | -24977.31 | 15.41 | -24936.82 | 17.23 | -24914.49 | 20.23 |
| -25146.65 | 0.75  | -25106.24 | 2.48 | -25061.80 | 8.26  | -25017.86 | 13.53 | -24968.89 | 23.83 | -24934.71 | 19.35 | -24915.62 | 19.10 |
| -25147.66 | -0.26 | -25106.09 | 2.64 | -25063.38 | 6.68  | -25021.63 | 9.76  | -24974.66 | 18.06 | -24931.88 | 22.18 | -24909.79 | 24.93 |
| -25149.97 | -2.57 | -25105.90 | 2.83 | -25062.08 | 7.98  | -25020.06 | 11.33 | -24975.86 | 16.87 | -24936.03 | 18.03 | -24913.51 | 21.22 |
| -25148.28 | -0.89 | -25106.45 | 2.28 | -25060.08 | 9.98  | -25019.11 | 12.28 | -24979.43 | 13.29 | -24937.67 | 16.39 |           |       |
| -25148.47 | -1.07 | -25105.61 | 3.12 | -25061.22 | 8.84  | -25016.65 | 14.74 | -24976.42 | 16.30 | -24934.85 | 19.20 |           |       |
| -25148.66 | -1.27 | -25106.94 | 1.79 | -25062.61 | 7.45  | -25021.44 | 9.95  | -24979.34 | 13.38 | -24936.54 | 17.52 |           |       |
| -25148.07 | -0.67 | -25105.67 | 3.06 |           |       | -25019.39 | 12.00 |           |       |           |       |           |       |
| -25146.87 | 0.52  | -25105.41 | 3.31 |           |       | -25019.99 | 11.40 |           |       |           |       |           |       |
| -25149.49 | -2.10 |           |      |           |       | -25018.84 | 12.55 |           |       |           |       |           |       |

Average energies -25148.32 -0.93 -25105.31 3.42 -25062.22 7.84 -25019.70 11.69 -24976.94 15.78 -24935.30 18.75 -24913.54 21.18

# Th

concentration in solid solution (%)  
number of atoms

| ground state energy | solid solution energy |           |      |           |       |           |       |           |       |           |       |           |       |
|---------------------|-----------------------|-----------|------|-----------|-------|-----------|-------|-----------|-------|-----------|-------|-----------|-------|
| 3                   | 6                     |           | 9    |           | 12    |           | 15    |           | 18    |           | 21    |           |       |
| 2                   | 4                     |           | 6    |           | 8     |           | 10    |           | 12    |           | 13    |           |       |
| -25152.93           | 0.09                  | -25115.53 | 4.45 | -25080.24 | 6.71  | -25042.77 | 11.14 | -24997.01 | 23.87 | -24966.59 | 21.25 | -24944.70 | 26.62 |
| -25153.91           | -0.88                 | -25115.94 | 4.05 | -25079.27 | 7.68  | -25040.68 | 13.24 | -25003.15 | 17.73 | -24963.28 | 24.56 | -24949.69 | 21.63 |
| -25153.19           | -0.16                 | -25118.15 | 1.84 | -25076.91 | 10.04 | -25038.26 | 15.65 | -25004.08 | 16.79 | -24962.96 | 24.88 | -24950.75 | 20.57 |
| -25153.98           | -0.96                 | -25114.86 | 5.13 | -25078.68 | 8.27  | -25043.06 | 10.86 | -25001.54 | 19.34 | -24965.28 | 22.56 | -24949.53 | 21.79 |
| -25155.19           | -2.16                 | -25116.53 | 3.46 | -25077.63 | 9.32  | -25040.21 | 13.71 | -25001.32 | 19.55 | -24967.57 | 20.27 | -24946.70 | 24.62 |
| -25153.94           | -0.91                 | -25115.07 | 4.92 | -25078.44 | 8.51  | -25041.40 | 12.51 | -24999.75 | 21.13 | -24960.88 | 26.96 | -24948.89 | 22.43 |
| -25153.95           | -0.93                 | -25116.23 | 3.76 | -25080.17 | 6.78  | -25041.67 | 12.25 | -25000.06 | 20.82 | -24964.38 | 23.46 | -24945.67 | 25.65 |
| -25154.11           | -1.09                 | -25116.35 | 3.64 | -25077.40 | 9.55  | -25039.14 | 14.78 | -25005.79 | 15.09 | -24966.52 | 21.32 | -24944.81 | 26.51 |
| -25153.78           | -0.75                 | -25115.94 | 4.05 | -25077.65 | 9.30  | -25042.66 | 11.25 | -25004.10 | 16.78 | -24965.07 | 22.77 | -24947.45 | 23.87 |
| -25153.60           | -0.57                 | -25116.54 | 3.45 | -25080.77 | 6.18  | -25041.77 | 12.15 | -25000.39 | 20.48 | -24964.68 | 23.16 | -24946.11 | 25.21 |
| -25155.19           | -2.16                 | -25115.06 | 4.93 | -25078.88 | 8.07  | -25038.55 | 15.37 | -24998.03 | 22.85 | -24961.80 | 26.04 | -24949.27 | 22.05 |
| -25153.75           | -0.73                 | -25116.86 | 3.13 | -25078.14 | 8.81  | -25039.15 | 14.76 | -25001.75 | 19.12 | -24967.38 | 20.46 | -24944.06 | 27.26 |
| -25153.25           | -0.22                 | -25117.06 | 2.93 | -25078.83 | 8.12  | -25041.50 | 12.42 | -25004.11 | 16.76 | -24965.76 | 22.08 | -24946.93 | 24.39 |
| -25153.59           | -0.57                 | -25115.76 | 4.23 | -25078.36 | 8.59  | -25042.74 | 11.17 | -25004.60 | 16.27 | -24959.73 | 28.11 | -24945.13 | 26.19 |
| -25153.48           | -0.45                 | -25114.81 | 5.18 | -25076.56 | 10.39 | -25040.16 | 13.76 | -25004.10 | 16.77 | -24964.46 | 23.37 | -24946.95 | 24.37 |
| -25153.45           | -0.42                 | -25114.64 | 5.35 | -25079.87 | 7.08  | -25040.70 | 13.22 | -25003.88 | 16.99 | -24963.62 | 24.22 | -24948.14 | 23.18 |
| -25153.73           | -0.71                 | -25115.60 | 4.38 | -25079.16 | 7.79  | -25042.10 | 11.81 | -24999.08 | 21.80 | -24966.83 | 21.01 | -24948.66 | 22.66 |
| -25152.48           | 0.54                  | -25115.12 | 4.86 | -25079.71 | 7.24  | -25040.42 | 13.49 | -25002.94 | 17.93 | -24968.72 | 19.12 | -24946.06 | 25.26 |

|           |       |           |      |           |       |           |       |           |        |           |       |           |       |
|-----------|-------|-----------|------|-----------|-------|-----------|-------|-----------|--------|-----------|-------|-----------|-------|
| -25153.73 | -0.70 | -25115.77 | 4.22 | -25076.96 | 9.99  | -25040.56 | 13.35 | -25003.69 | 17.18  | -24966.10 | 21.73 | -24948.87 | 22.45 |
| -25154.79 | -1.76 | -25115.69 | 4.29 | -25079.75 | 7.20  | -25039.27 | 14.64 | -25004.09 | 16.79  | -24966.38 | 21.46 | -24946.88 | 24.44 |
| -25154.20 | -1.18 | -25115.94 | 4.05 | -25078.96 | 7.99  | -25039.28 | 14.64 | -25003.60 | 17.28  | -24962.85 | 24.99 | -24949.90 | 21.42 |
| -25154.25 | -1.23 | -25115.01 | 4.98 | -25078.52 | 8.43  | -25032.75 | 21.17 | -25001.32 | 19.55  | -24965.46 | 22.38 | -24943.30 | 28.02 |
| -25153.47 | -0.45 | -25115.98 | 4.01 | -25076.15 | 10.80 | -25042.73 | 11.18 | -25005.05 | 15.83  | -24963.51 | 24.33 | -24945.40 | 25.92 |
| -25154.18 | -1.15 | -25113.91 | 6.08 | -25076.76 | 10.19 | -25041.26 | 12.66 | -25004.11 | 16.77  | -24963.27 | 24.57 | -24948.92 | 22.40 |
| -25153.23 | -0.20 | -25116.38 | 3.60 | -25078.23 | 8.72  | -25037.65 | 16.27 | -25002.19 | 18.68  | -24966.85 | 20.98 | -24951.14 | 20.18 |
| -25154.47 | -1.45 | -25115.97 | 4.02 | -25076.51 | 10.44 | -25041.23 | 12.69 | -25000.97 | 19.91  | -24961.41 | 26.43 | -24950.47 | 20.85 |
| -25152.52 | 0.50  | -25116.33 | 3.66 | -25078.78 | 8.17  | -25038.85 | 15.06 | -24996.82 | 24.05  | -24964.44 | 23.40 | -24948.02 | 23.30 |
| -25154.20 | -1.18 | -25115.90 | 4.09 | -25078.56 | 8.39  | -25041.80 | 12.11 | -24998.90 | 21.97  | -24968.59 | 19.25 | -24946.02 | 25.30 |
| -25152.73 | 0.29  | -25116.49 | 3.50 | -25079.28 | 7.67  | -25041.53 | 12.38 | -25005.25 | 15.63  | -24963.26 | 24.58 | -24947.68 | 23.64 |
| -25154.87 | -1.85 | -25116.08 | 3.91 | -25077.13 | 9.82  | -25041.19 | 12.72 | -25001.70 | 19.18  | -24963.71 | 24.13 | -24943.11 | 28.21 |
| -25154.00 | -0.97 | -25113.98 | 6.00 | -25079.84 | 7.11  | -25040.18 | 13.73 | -25003.19 | 17.69  | -24968.75 | 19.08 | -24944.99 | 26.33 |
| -25151.80 | 1.22  | -25116.22 | 3.76 | -25079.19 | 7.76  | -25042.89 | 11.02 | -25005.05 | 15.83  | -24968.99 | 18.85 | -24949.92 | 21.40 |
| -25152.52 | 0.50  | -25115.55 | 4.44 | -25078.23 | 8.72  | -25042.20 | 11.72 | -25002.27 | 18.61  | -24966.44 | 21.40 | -24946.06 | 25.26 |
| -25153.13 | -0.11 | -25116.95 | 3.04 | -25081.54 | 5.41  | -25042.89 | 11.03 | -25003.94 | 16.94  | -24966.16 | 21.68 | -24944.89 | 26.43 |
| -25154.77 | -1.75 | -25114.87 | 5.12 | -25078.47 | 8.48  | -25040.97 | 12.94 | -25000.65 | 20.23  | -24965.96 | 21.88 | -24946.81 | 24.51 |
| -25151.87 | 1.16  | -25115.19 | 4.79 | -25080.78 | 6.17  | -25039.72 | 14.19 | -25002.02 | 18.86  | -24964.42 | 23.42 | -24950.13 | 21.19 |
| -25154.15 | -1.13 | -25114.68 | 5.31 | -25081.30 | 5.65  | -25040.91 | 13.00 | -25004.47 | 16.40  | -24964.17 | 23.66 | -24949.65 | 21.67 |
| -25154.76 | -1.73 | -25115.42 | 4.57 | -25077.87 | 9.08  | -25038.91 | 15.00 | -25005.39 | 15.49  | -24963.49 | 24.35 | -24946.67 | 24.65 |
| -25154.06 | -1.04 | -25119.00 | 0.98 | -25078.01 | 8.94  | -25039.54 | 14.37 | -25003.83 | 17.04  | -24962.70 | 25.13 | -24946.23 | 25.09 |
| -25154.18 | -1.16 | -25114.71 | 5.27 | -25075.72 | 11.23 | -25040.92 | 12.99 | -25001.79 | 19.09  | -24967.59 | 20.25 | -24947.66 | 23.66 |
| -25153.70 | -0.67 | -25115.30 | 4.69 | -25076.34 | 10.61 | -25038.66 | 15.26 | -25003.07 | 17.81  | -24960.93 | 26.90 | -24947.40 | 23.92 |
| -25153.92 | -0.89 | -25116.04 | 3.95 | -25077.48 | 9.47  | -25037.61 | 16.30 | -25002.64 | 18.24  | -24967.55 | 20.29 | -24947.60 | 23.72 |
| -25153.66 | -0.63 | -25118.18 | 1.80 | -25075.45 | 11.50 | -25038.43 | 15.48 | -25003.99 | 16.88  | -24967.52 | 20.32 | -24938.61 | 32.71 |
| -25154.47 | -1.45 | -25115.10 | 4.89 | -25078.97 | 7.98  | -25041.82 | 12.10 | -25000.26 | 20.61  | -24963.35 | 24.48 | -24939.68 | 31.64 |
| -25152.85 | 0.17  | -25116.17 | 3.82 | -25075.84 | 11.11 | -25041.65 | 12.26 | -25002.73 | 18.14  | -24963.42 | 24.42 | -24945.41 | 25.91 |
| -25153.07 | -0.04 | -25115.96 | 4.03 | -25079.63 | 7.32  | -25043.96 | 9.95  | -25005.44 | 15.43  | -24964.62 | 23.22 | -24943.90 | 27.42 |
| -25154.90 | -1.87 | -25114.43 | 5.55 | -25077.00 | 9.95  | -25037.14 | 16.77 | -25002.45 | 18.43  | -24949.55 | 38.29 | -24946.36 | 24.96 |
| -25154.49 | -1.46 | -25114.27 | 5.72 | -25078.46 | 8.49  | -25041.25 | 12.66 | -25004.95 | 15.92  | -24967.62 | 20.22 | -24947.68 | 23.64 |
| -25153.01 | 0.02  | -25116.79 | 3.20 | -25076.20 | 10.75 | -25040.53 | 13.39 | -24998.81 | 22.07  | -24964.80 | 23.04 | -24946.23 | 25.09 |
| -25153.30 | -0.28 | -25116.80 | 3.19 | -25078.45 | 8.50  | -25039.12 | 14.79 | -25003.87 | 17.01  | -24960.54 | 27.30 | -24941.89 | 29.43 |
| -25153.42 | -0.40 | -25113.76 | 6.23 | -25076.05 | 10.91 | -25036.76 | 17.15 | -25004.21 | 16.67  | -24965.67 | 22.17 | -24943.55 | 27.77 |
| -25154.25 | -1.22 | -25116.30 | 3.68 | -25073.67 | 13.28 | -25040.14 | 13.77 | -25000.14 | 20.74  | -24967.91 | 19.92 | -24948.39 | 22.93 |
| -25153.85 | -0.83 | -25116.60 | 3.39 | -25078.27 | 8.68  | -25039.43 | 14.48 | -25003.06 | 17.82  | -24966.82 | 21.02 | -24946.40 | 24.92 |
| -25154.18 | -1.16 | -25115.77 | 4.22 | -25078.11 | 8.84  | -25041.31 | 12.61 | -25008.31 | 12.56  | -24969.21 | 18.63 | -24949.17 | 22.15 |
| -25153.11 | -0.09 | -25117.00 | 2.98 | -25076.94 | 10.01 | -25039.62 | 14.29 | -25003.98 | 16.90  | -24966.93 | 20.90 | -24944.46 | 26.86 |
| -25152.76 | 0.26  | -25116.12 | 3.87 | -25075.69 | 11.27 | -25041.32 | 12.59 | -25003.77 | 17.11  | -24962.57 | 25.27 | -24948.33 | 22.99 |
| -25153.67 | -0.65 | -25117.54 | 2.45 | -25075.73 | 11.22 | -25042.91 | 11.00 | -25002.61 | 18.27  | -24967.54 | 20.30 | -24942.57 | 28.75 |
| -25153.91 | -0.89 | -25116.61 | 3.38 | -25078.72 | 8.23  | -25037.23 | 16.68 | -24997.38 | 23.49  | -24965.52 | 22.32 | -24948.31 | 23.01 |
| -25154.22 | -1.19 | -25113.24 | 6.74 | -25078.41 | 8.54  | -25036.27 | 17.65 | -25044.61 | -23.74 | -24964.75 | 23.09 | -24949.20 | 22.12 |

|           |       |           |      |           |       |           |       |           |       |           |       |           |       |
|-----------|-------|-----------|------|-----------|-------|-----------|-------|-----------|-------|-----------|-------|-----------|-------|
| -25153.85 | -0.83 | -25116.79 | 3.20 | -25079.27 | 7.68  | -25039.23 | 14.68 | -25002.59 | 18.28 | -24963.68 | 24.16 | -24941.29 | 30.03 |
| -25154.23 | -1.20 | -25115.89 | 4.10 | -25077.48 | 9.47  | -25041.42 | 12.49 | -25003.88 | 16.99 | -24962.29 | 25.55 | -24946.88 | 24.44 |
| -25153.55 | -0.52 | -25115.70 | 4.29 | -25078.06 | 8.89  | -25041.66 | 12.25 | -24968.92 | 51.96 | -24958.33 | 29.51 | -24946.89 | 24.43 |
| -25153.81 | -0.79 | -25114.95 | 5.04 | -25076.75 | 10.20 | -25040.33 | 13.58 | -25000.49 | 20.39 | -24964.61 | 23.22 | -24942.26 | 29.06 |
| -25152.63 | 0.40  | -25116.94 | 3.05 | -25079.87 | 7.08  | -25041.40 | 12.51 | -25006.00 | 14.88 | -24962.90 | 24.94 | -24941.80 | 29.52 |
| -25151.64 | 1.38  | -25114.19 | 5.79 | -25077.05 | 9.90  | -25040.77 | 13.14 | -25003.95 | 16.93 | -24959.36 | 28.48 | -24945.43 | 25.89 |
| -25154.73 | -1.70 | -25113.88 | 6.11 | -25077.80 | 9.15  | -25041.05 | 12.86 | -25002.97 | 17.90 | -24967.51 | 20.33 | -24943.31 | 28.01 |
| -25153.46 | -0.44 | -25117.08 | 2.90 | -25073.40 | 13.55 | -25039.15 | 14.77 | -25003.68 | 17.19 | -24965.87 | 21.96 | -24940.24 | 31.08 |
| -25152.18 | 0.84  | -25116.61 | 3.38 | -25078.94 | 8.01  | -25039.84 | 14.08 | -25003.55 | 17.33 | -24963.38 | 24.46 | -24949.14 | 22.18 |
| -25153.17 | -0.14 | -25116.58 | 3.40 | -25078.01 | 8.94  | -25037.88 | 16.04 | -25003.55 | 17.33 | -24967.89 | 19.95 | -24944.86 | 26.46 |
| -25153.43 | -0.41 | -25115.42 | 4.57 | -25077.38 | 9.57  | -25041.13 | 12.78 | -25004.34 | 16.53 | -24960.57 | 27.27 | -24948.50 | 22.82 |
| -25154.21 | -1.18 | -25115.53 | 4.46 | -25072.05 | 14.90 | -25041.14 | 12.78 | -25000.78 | 20.09 | -24965.58 | 22.26 | -24946.65 | 24.67 |
| -25153.67 | -0.65 | -25113.99 | 6.00 | -25076.31 | 10.64 | -25039.22 | 14.69 | -25003.70 | 17.17 | -24964.15 | 23.69 | -24945.61 | 25.71 |
| -25154.19 | -1.17 | -25115.04 | 4.95 | -25078.88 | 8.07  | -25041.74 | 12.18 | -25002.09 | 18.79 | -24963.75 | 24.09 | -24944.42 | 26.90 |
| -25154.33 | -1.31 | -25115.17 | 4.82 | -25077.84 | 9.11  | -25040.00 | 13.91 | -25004.55 | 16.33 | -24968.37 | 19.47 | -24942.91 | 28.41 |
| -25154.12 | -1.09 | -25116.82 | 3.16 | -25080.01 | 6.94  | -25039.66 | 14.26 | -25000.99 | 19.89 | -24966.08 | 21.76 | -24949.79 | 21.53 |
| -25153.65 | -0.63 | -25116.16 | 3.83 | -25078.69 | 8.26  | -25037.30 | 16.61 | -25002.79 | 18.08 | -24961.28 | 26.56 | -24949.19 | 22.13 |
| -25153.77 | -0.74 | -25114.03 | 5.96 | -25079.59 | 7.36  | -25042.97 | 10.94 | -25004.56 | 16.31 | -24967.13 | 20.71 | -24946.95 | 24.37 |
| -25153.09 | -0.07 | -25117.95 | 2.04 | -25077.84 | 9.11  | -25041.14 | 12.78 | -25004.99 | 15.89 | -24961.98 | 25.86 | -24948.42 | 22.90 |
| -25153.80 | -0.78 | -25116.33 | 3.66 | -25079.18 | 7.77  | -25041.91 | 12.00 | -25001.80 | 19.07 | -24966.90 | 20.94 | -24942.25 | 29.07 |
| -25153.55 | -0.53 | -25115.03 | 4.95 | -25076.68 | 10.27 | -25038.60 | 15.31 | -25003.75 | 17.13 | -24964.73 | 23.11 | -24946.17 | 25.15 |
| -25154.14 | -1.12 | -25115.00 | 4.99 | -25079.52 | 7.43  | -25042.55 | 11.37 | -25000.28 | 20.60 | -24968.22 | 19.62 | -24944.58 | 26.74 |
| -25155.52 | -2.49 | -25117.77 | 2.22 | -25078.50 | 8.45  | -25038.01 | 15.91 | -25001.21 | 19.67 | -24961.80 | 26.04 | -24937.98 | 33.34 |
| -25153.82 | -0.79 | -25118.01 | 1.98 | -25079.42 | 7.53  | -25035.61 | 18.30 | -25001.23 | 19.64 | -24963.01 | 24.83 | -24948.29 | 23.03 |
| -25154.40 | -1.38 | -25115.51 | 4.48 | -25079.95 | 7.00  | -25041.34 | 12.58 | -25005.42 | 15.45 | -24965.51 | 22.33 | -24946.93 | 24.39 |
| -25153.01 | 0.01  | -25117.77 | 2.22 | -25078.09 | 8.86  | -25043.07 | 10.84 | -25004.22 | 16.66 | -24965.78 | 22.06 | -24944.36 | 26.96 |
| -25153.47 | -0.45 | -25115.43 | 4.55 | -25078.63 | 8.33  | -25039.51 | 14.41 | -24996.65 | 24.23 | -24964.32 | 23.52 | -24948.03 | 23.29 |
| -25155.20 | -2.18 | -25115.40 | 4.58 | -25077.35 | 9.60  | -25040.25 | 13.67 | -25001.11 | 19.77 | -24965.28 | 22.55 | -24947.66 | 23.66 |
| -25153.69 | -0.66 | -25116.14 | 3.85 | -25080.88 | 6.07  | -25043.43 | 10.48 | -24999.26 | 21.61 | -24964.45 | 23.38 | -24944.95 | 26.37 |
| -25153.61 | -0.58 | -25117.36 | 2.63 | -25075.47 | 11.48 | -25038.39 | 15.52 | -25001.42 | 19.45 | -24965.51 | 22.33 | -24946.40 | 24.92 |
| -25154.05 | -1.03 | -25117.66 | 2.33 | -25073.33 | 13.62 | -25040.85 | 13.06 | -24998.84 | 22.03 | -24965.98 | 21.86 | -24944.31 | 27.01 |
| -25153.27 | -0.25 | -25117.01 | 2.98 | -25074.72 | 12.23 | -25042.50 | 11.41 | -25002.35 | 18.53 | -24956.16 | 31.68 | -24948.71 | 22.61 |
| -25153.62 | -0.59 | -25117.26 | 2.73 | -25076.69 | 10.26 | -25042.88 | 11.03 | -25005.36 | 15.51 | -24968.71 | 19.13 | -24940.83 | 30.49 |
| -25153.80 | -0.77 | -25113.81 | 6.18 | -25078.41 | 8.54  | -25040.58 | 13.33 | -25003.22 | 17.66 | -24965.32 | 22.52 | -24948.55 | 22.77 |
| -25155.15 | -2.12 | -25115.86 | 4.13 | -25078.46 | 8.49  | -25038.30 | 15.61 | -24996.78 | 24.09 | -24966.42 | 21.42 | -24945.93 | 25.39 |
| -25154.40 | -1.37 | -25115.02 | 4.97 | -25071.54 | 15.41 | -25039.54 | 14.37 | -25000.96 | 19.92 | -24964.47 | 23.37 | -24947.03 | 24.29 |
| -25153.00 | 0.02  | -25116.85 | 3.14 | -25078.11 | 8.84  | -25038.39 | 15.52 | -25002.35 | 18.52 | -24968.51 | 19.33 | -24938.89 | 32.43 |
| -25154.34 | -1.32 | -25117.25 | 2.74 | -25079.71 | 7.24  | -25039.80 | 14.11 | -25004.86 | 16.02 | -24967.54 | 20.30 | -24948.97 | 22.35 |
| -25154.31 | -1.28 | -25113.80 | 6.19 | -25078.16 | 8.79  | -25039.26 | 14.65 | -25003.19 | 17.69 | -24967.38 | 20.46 | -24945.36 | 25.96 |
| -25153.14 | -0.11 | -25111.86 | 8.13 | -25077.15 | 9.81  | -25040.38 | 13.53 | -25002.95 | 17.93 | -24963.26 | 24.58 | -24947.29 | 24.03 |
| -25153.93 | -0.91 | -25116.68 | 3.31 | -25078.35 | 8.60  | -25043.24 | 10.67 | -25004.98 | 15.90 | -24970.45 | 17.39 | -24951.05 | 20.27 |

|           |       |           |      |           |       |           |       |           |       |           |       |           |       |
|-----------|-------|-----------|------|-----------|-------|-----------|-------|-----------|-------|-----------|-------|-----------|-------|
| -25153.75 | -0.73 | -25115.98 | 4.00 | -25076.05 | 10.91 | -25039.73 | 14.18 | -25003.24 | 17.64 | -24967.26 | 20.58 | -24943.15 | 28.17 |
| -25154.06 | -1.04 | -25117.22 | 2.77 | -25079.63 | 7.32  | -25041.37 | 12.54 | -24998.10 | 22.77 | -24966.80 | 21.04 | -24945.50 | 25.82 |
| -25152.59 | 0.43  | -25115.10 | 4.89 | -25077.44 | 9.51  | -25039.09 | 14.82 | -25004.22 | 16.66 | -24961.47 | 26.37 | -24951.35 | 19.97 |
| -25153.18 | -0.16 | -25114.63 | 5.36 | -25078.97 | 7.98  | -25041.15 | 12.77 | -25002.64 | 18.23 | -31573.07 |       | -24943.50 | 27.82 |
| -25154.49 | -1.47 | -25115.97 | 4.01 | -25078.13 | 8.82  | -25040.27 | 13.65 | -25002.55 | 18.32 | -24961.62 | 26.21 | -24946.43 | 24.89 |
| -25154.37 | -1.34 | -25114.77 | 5.22 | -25080.67 | 6.28  | -25039.08 | 14.84 | -25004.11 | 16.77 | -24965.44 | 22.39 | -24948.32 | 23.00 |
| -25154.81 | -1.79 | -25116.59 | 3.40 | -25076.22 | 10.73 | -25040.55 | 13.36 | -25003.47 | 17.41 | -24964.10 | 23.74 | -24949.72 | 21.60 |
| -25153.40 | -0.38 | -25116.81 | 3.18 | -25076.78 | 10.17 | -25037.32 | 16.59 | -25004.97 | 15.90 | -24966.09 | 21.75 | -24941.45 | 29.86 |
| -25153.50 | -0.48 | -25114.88 | 5.11 | -25076.18 | 10.77 | -25042.04 | 11.88 | -25004.43 | 16.44 | -24965.93 | 21.91 | -24945.13 | 26.19 |
| -25153.86 | -0.84 | -25116.72 | 3.27 | -25081.16 | 5.79  | -25041.96 | 11.96 | -25004.81 | 16.07 | -24963.52 | 24.32 | -24945.74 | 25.58 |
| -25153.13 | -0.10 | -25116.11 | 3.88 | -25078.89 | 8.06  | -25042.27 | 11.65 | -25003.86 | 17.02 | -24964.76 | 23.08 | -24947.56 | 23.76 |
| -25153.07 | -0.05 | -25114.68 | 5.31 | -25078.60 | 8.35  | -25038.31 | 15.60 |           |       | -24966.79 | 21.04 | -24948.87 | 22.45 |
| -25154.05 | -1.02 | -25115.39 | 4.60 | -25079.38 | 7.57  | -25034.88 | 19.03 |           |       | -24964.61 | 23.23 | -24947.93 | 23.39 |
| -25153.95 | -0.92 | -25117.04 | 2.95 | -25078.43 | 8.52  | -25039.90 | 14.01 |           |       | -24965.73 | 22.10 | -24944.67 | 26.65 |
| -25153.23 | -0.21 | -25115.10 | 4.89 | -25079.35 | 7.60  |           |       |           |       |           |       | -24942.71 | 28.61 |
| -25151.52 | 1.50  | -25114.46 | 5.53 |           |       |           |       |           |       |           |       | -24950.56 | 20.76 |
| -25154.01 | -0.98 | -25114.40 | 5.58 |           |       |           |       |           |       |           |       | -24948.72 | 22.60 |
|           |       | -25117.25 | 2.74 |           |       |           |       |           |       |           |       |           |       |

Average energies

|           |       |           |      |           |      |           |       |           |       |           |       |           |       |
|-----------|-------|-----------|------|-----------|------|-----------|-------|-----------|-------|-----------|-------|-----------|-------|
| -25153.73 | -0.70 | -25115.84 | 4.15 | -25077.98 | 8.97 | -25040.29 | 13.63 | -25002.70 | 18.18 | -25022.79 | 23.01 | -24946.31 | 25.01 |
|-----------|-------|-----------|------|-----------|------|-----------|-------|-----------|-------|-----------|-------|-----------|-------|

## U

concentration in solid solution (%)  
number of atoms

|           | ground<br>state<br>energy | solid<br>solution<br>energy |      |           |       |           |       |           |       |           |       |           |       |
|-----------|---------------------------|-----------------------------|------|-----------|-------|-----------|-------|-----------|-------|-----------|-------|-----------|-------|
|           | 3                         | 6                           |      | 9         |       | 12        |       | 15        |       | 18        |       | 21        |       |
|           | 2                         | 4                           |      | 6         |       | 8         |       | 10        |       | 12        |       | 13        |       |
| -25157.65 | 0.39                      | -25127.36                   | 2.67 | -25094.66 | 7.35  | -25063.30 | 10.68 | -25028.05 | 17.91 | -24997.49 | 20.46 | -24982.11 | 21.83 |
| -25157.59 | 0.45                      | -25122.21                   | 7.81 | -25090.36 | 11.64 | -25059.57 | 14.41 | -25026.29 | 19.68 | -24997.66 | 20.29 | -24973.01 | 30.93 |
| -25158.81 | -0.76                     | -25122.73                   | 7.29 | -25094.82 | 7.19  | -25055.76 | 18.23 | -25027.76 | 18.21 | -24997.75 | 20.20 | -24984.15 | 19.79 |
| -25155.95 | 2.09                      | -25125.99                   | 4.03 | -25095.49 | 6.51  | -25061.84 | 12.15 | -25022.14 | 23.83 | -24992.77 | 25.18 | -24979.82 | 24.12 |
| -25158.13 | -0.09                     | -25125.24                   | 4.79 | -25093.15 | 8.86  | -25057.50 | 16.49 | -25029.23 | 16.74 | -24998.56 | 19.39 | -24978.59 | 25.35 |
| -25149.24 | 8.80                      | -25124.62                   | 5.41 | -25094.60 | 7.41  | -25061.53 | 12.46 | -25032.15 | 13.82 | -24989.86 | 28.09 | -24978.88 | 25.06 |
| -25157.47 | 0.57                      | -25125.81                   | 4.22 | -25090.11 | 11.89 | -25060.23 | 13.76 | -25028.51 | 17.46 | -24997.43 | 20.52 | -24979.54 | 24.40 |
| -25149.67 | 8.37                      | -25125.38                   | 4.65 | -25092.36 | 9.65  | -25058.61 | 15.38 | -25032.38 | 13.59 | -24995.96 | 21.99 | -24981.50 | 22.44 |
| -25157.87 | 0.17                      | -25126.14                   | 3.88 | -25093.09 | 8.92  | -25060.74 | 13.25 | -25028.21 | 17.76 | -24996.12 | 21.83 | -24978.15 | 25.79 |
| -25156.37 | 1.68                      | -25126.17                   | 3.85 | -25095.63 | 6.38  | -25063.81 | 10.18 | -25028.86 | 17.11 | -24994.58 | 23.37 | -24983.85 | 20.10 |
| -25156.64 | 1.40                      | -25126.76                   | 3.27 | -25092.38 | 9.63  | -25058.58 | 15.41 | -25027.81 | 18.16 | -24994.46 | 23.49 | -24979.31 | 24.64 |
| -25157.98 | 0.07                      | -25125.88                   | 4.15 | -25090.12 | 11.89 | -25042.99 | 31.00 | -25030.22 | 15.75 | -24997.52 | 20.43 | -24979.37 | 24.57 |
| -25158.96 | -0.92                     | -25126.51                   | 3.51 | -25087.89 | 14.12 | -25062.80 | 11.18 | -25030.09 | 15.88 | -25000.62 | 17.33 | -24972.73 | 31.21 |
| -25157.27 | 0.77                      | -25123.43                   | 6.60 | -25091.54 | 10.46 | -25059.98 | 14.01 | -25028.11 | 17.86 | -24997.10 | 20.85 | -24980.88 | 23.06 |

|           |       |           |       |           |       |           |       |           |       |           |       |           |       |
|-----------|-------|-----------|-------|-----------|-------|-----------|-------|-----------|-------|-----------|-------|-----------|-------|
| -25157.66 | 0.38  | -25125.00 | 5.03  | -25091.13 | 10.88 | -25063.43 | 10.55 | -25032.00 | 13.97 | -24996.65 | 21.31 | -24979.43 | 24.51 |
| -25158.17 | -0.12 | -25123.68 | 6.35  | -25092.04 | 9.97  | -25057.71 | 16.28 | -25030.18 | 15.79 | -24996.40 | 21.55 | -24976.88 | 27.06 |
| -25158.13 | -0.09 | -25125.35 | 4.68  | -25094.92 | 7.08  | -25060.75 | 13.24 | -25031.24 | 14.72 | -24998.18 | 19.77 | -24982.20 | 21.74 |
| -25149.92 | 8.12  | -25124.15 | 5.88  | -25095.31 | 6.70  | -25057.88 | 16.11 | -25029.56 | 16.41 | -24997.63 | 20.32 | -24980.31 | 23.63 |
| -25151.79 | 6.25  | -25123.31 | 6.72  | -25094.15 | 7.85  | -25058.24 | 15.75 | -25025.10 | 20.87 | -24995.02 | 22.93 | -24973.69 | 30.25 |
| -25159.18 | -1.13 | -25123.48 | 6.55  | -25090.73 | 11.27 | -25062.08 | 11.90 | -25026.91 | 19.06 | -24997.97 | 19.98 | -24978.15 | 25.80 |
| -25157.17 | 0.88  | -25125.91 | 4.11  | -25095.66 | 6.35  | -25062.21 | 11.78 | -25026.04 | 19.93 | -24997.61 | 20.34 | -24977.26 | 26.68 |
| -25157.94 | 0.11  | -25126.86 | 3.17  | -25092.41 | 9.60  | -25060.08 | 13.91 | -25022.68 | 23.29 | -24996.92 | 21.03 | -24981.12 | 22.82 |
| -25149.43 | 8.62  | -25125.46 | 4.57  | -25092.69 | 9.32  | -25060.43 | 13.56 | -25029.74 | 16.23 | -24997.99 | 19.96 | -24979.72 | 24.22 |
| -25158.82 | -0.77 | -25125.63 | 4.40  | -25089.26 | 12.75 | -25057.50 | 16.49 | -25027.15 | 18.81 | -24997.58 | 20.38 | -24984.09 | 19.85 |
| -25157.81 | 0.23  | -25125.30 | 4.72  | -25094.78 | 7.23  | -25061.44 | 12.55 | -25031.17 | 14.80 | -24992.66 | 25.30 | -24975.49 | 28.45 |
| -25149.89 | 8.15  | -25128.03 | 2.00  | -25093.29 | 8.72  | -25062.26 | 11.73 | -25027.49 | 18.48 | -24997.58 | 20.37 | -24981.24 | 22.70 |
| -25158.24 | -0.20 | -25125.50 | 4.52  | -25092.36 | 9.65  | -25061.99 | 12.00 | -25025.78 | 20.19 | -24992.54 | 25.41 | -24977.67 | 26.28 |
| -25158.43 | -0.38 | -25127.17 | 2.85  | -25093.64 | 8.36  | -25058.27 | 15.72 | -25031.19 | 14.78 | -24996.96 | 20.99 | -24980.49 | 23.45 |
| -25157.32 | 0.73  | -25125.72 | 4.31  | -25090.42 | 11.58 | -25061.16 | 12.83 | -25029.42 | 16.55 | -24997.32 | 20.63 | -24981.20 | 22.74 |
| -25157.67 | 0.37  | -25125.95 | 4.07  | -25091.18 | 10.83 | -25063.73 | 10.26 | -25031.30 | 14.67 | -24996.04 | 21.91 | -24979.05 | 24.89 |
| -25157.03 | 1.01  | -25126.61 | 3.42  | -25093.73 | 8.27  | -25063.62 | 10.37 | -25030.91 | 15.06 | -24995.60 | 22.35 | -24984.43 | 19.51 |
| -25157.31 | 0.74  | -25125.03 | 4.99  | -25093.79 | 8.22  | -25058.18 | 15.81 | -25029.11 | 16.86 | -24994.29 | 23.66 | -24983.65 | 20.29 |
| -25158.74 | -0.70 | -25126.61 | 3.42  | -25092.21 | 9.80  | -25061.86 | 12.13 | -25028.79 | 17.18 | -24999.20 | 18.75 | -24979.51 | 24.44 |
| -25157.07 | 0.97  | -25125.63 | 4.39  | -25092.36 | 9.65  | -25058.35 | 15.64 | -25024.48 | 21.49 | -24992.91 | 25.04 | -24981.17 | 22.77 |
| -25157.95 | 0.10  | -25127.16 | 2.87  | -25091.95 | 10.05 | -25063.08 | 10.91 | -25027.50 | 18.47 | -24996.38 | 21.57 | -24981.81 | 22.13 |
| -25156.88 | 1.16  | -25125.12 | 4.90  | -25093.45 | 8.56  | -25057.64 | 16.35 | -25029.87 | 16.10 | -24997.53 | 20.42 | -24978.05 | 25.90 |
| -25157.43 | 0.61  | -25124.13 | 5.89  | -25093.44 | 8.57  | -25060.49 | 13.50 | -25029.65 | 16.32 | -24998.23 | 19.72 | -24982.46 | 21.48 |
| -25158.10 | -0.05 | -25121.70 | 8.32  | -25091.29 | 10.72 | -25058.64 | 15.35 | -25028.95 | 17.02 | -24997.66 | 20.29 | -24981.85 | 22.09 |
| -25157.78 | 0.26  | -25122.11 | 7.92  | -25093.28 | 8.73  | -25058.51 | 15.48 | -25031.07 | 14.90 | -24998.87 | 19.08 | -24979.79 | 24.15 |
| -25150.11 | 7.94  | -25125.65 | 4.38  | -25092.37 | 9.64  | -25063.71 | 10.28 | -25029.45 | 16.52 | -24998.16 | 19.79 | -24979.78 | 24.16 |
| -25157.04 | 1.00  | -25121.84 | 8.18  | -25095.68 | 6.32  | -25060.99 | 12.99 | -25030.12 | 15.85 | -25001.31 | 16.64 | -24979.74 | 24.20 |
| -25157.49 | 0.55  | -25124.03 | 6.00  | -25091.09 | 10.91 | -25061.37 | 12.61 | -25028.11 | 17.86 | -24987.43 | 30.52 | -24981.71 | 22.23 |
| -25157.26 | 0.78  | -25125.02 | 5.01  | -25093.90 | 8.11  | -25059.54 | 14.45 | -25024.62 | 21.35 | -24997.23 | 20.72 | -24976.97 | 26.97 |
| -25156.56 | 1.48  | -25124.42 | 5.61  | -25091.32 | 10.69 | -25059.23 | 14.76 | -25029.79 | 16.18 | -24993.86 | 24.09 | -24980.81 | 23.13 |
| -25159.06 | -1.02 | -25127.30 | 2.73  | -25095.46 | 6.54  | -25061.70 | 12.29 | -25025.52 | 20.45 | -24992.86 | 25.09 | -24972.62 | 31.33 |
| -25150.72 | 7.33  | -25122.82 | 7.20  | -25093.12 | 8.89  | -25059.99 | 13.99 | -25025.81 | 20.16 | -24996.72 | 21.23 | -24984.52 | 19.43 |
| -25149.43 | 8.61  | -25125.21 | 4.81  | -25092.08 | 9.93  | -25061.75 | 12.24 | -25027.55 | 18.42 | -24998.23 | 19.72 | -24974.56 | 29.38 |
| -25156.48 | 1.56  | -25115.27 | 14.76 | -25092.52 | 9.49  | -25059.31 | 14.67 | -25027.81 | 18.16 | -24995.22 | 22.73 | -24982.22 | 21.72 |
| -25158.27 | -0.23 | -25125.77 | 4.26  | -25093.45 | 8.56  | -25059.28 | 14.71 | -25024.93 | 21.04 | -24995.15 | 22.80 | -24981.46 | 22.49 |
| -25156.59 | 1.46  | -25124.93 | 5.09  | -25095.19 | 6.81  | -25061.39 | 12.60 | -25030.04 | 15.93 | -24999.54 | 18.41 | -24981.70 | 22.25 |
| -25156.56 | 1.48  | -25124.82 | 5.21  | -25092.42 | 9.58  | -25062.50 | 11.49 | -25026.77 | 19.20 | -24995.20 | 22.75 | -24980.33 | 23.61 |
| -25157.69 | 0.36  | -25125.73 | 4.29  | -25092.27 | 9.73  | -25061.84 | 12.15 | -25031.10 | 14.87 | -24995.66 | 22.29 | -24981.16 | 22.78 |
| -25157.82 | 0.23  | -25126.42 | 3.60  | -25088.08 | 13.93 | -25058.45 | 15.53 | -25022.39 | 23.58 | -24991.87 | 26.08 | -24980.43 | 23.51 |
| -25158.92 | -0.87 | -25125.73 | 4.30  | -25093.46 | 8.55  | -25061.29 | 12.70 | -25026.46 | 19.51 | -24996.02 | 21.93 | -24979.37 | 24.57 |
| -25149.58 | 8.46  | -25125.86 | 4.16  | -25092.32 | 9.69  | -25061.92 | 12.07 | -25027.20 | 18.77 | -24995.59 | 22.37 | -24984.22 | 19.72 |

|           |       |           |      |           |       |           |       |           |       |           |       |           |       |
|-----------|-------|-----------|------|-----------|-------|-----------|-------|-----------|-------|-----------|-------|-----------|-------|
| -25156.03 | 2.01  | -25123.83 | 6.20 | -25091.90 | 10.10 | -25058.56 | 15.43 | -25030.52 | 15.45 | -24997.80 | 20.15 | -24981.57 | 22.37 |
| -25157.40 | 0.64  | -25124.59 | 5.44 | -25094.54 | 7.47  | -25061.93 | 12.06 | -25028.95 | 17.02 | -24997.34 | 20.61 | -24981.92 | 22.02 |
| -25158.79 | -0.75 | -25123.15 | 6.87 | -25092.87 | 9.14  | -25061.82 | 12.16 | -25028.83 | 17.14 | -24996.86 | 21.10 |           |       |
| -25157.45 | 0.60  | -25124.50 | 5.52 | -25091.14 | 10.86 |           |       | -25027.89 | 18.07 | -24997.95 | 20.00 |           |       |
| -25157.14 | 0.90  | -25123.07 | 6.95 | -25093.59 | 8.41  |           |       | -25027.20 | 18.77 | -24993.30 | 24.65 |           |       |
| -25157.91 | 0.14  | -25124.68 | 5.34 | -25094.08 | 7.93  |           |       | -25026.43 | 19.54 | -24997.53 | 20.42 |           |       |
| -25155.19 | 2.85  | -25124.51 | 5.52 | -25091.42 | 10.59 |           |       | -25030.85 | 15.12 | -24996.12 | 21.83 |           |       |
| -25158.73 | -0.69 | -25123.19 | 6.84 | -25090.88 | 11.13 |           |       | -25021.36 | 24.61 | -24996.64 | 21.31 |           |       |
| -25157.90 | 0.15  | -25125.65 | 4.37 | -25091.58 | 10.43 |           |       | -25026.18 | 19.79 | -24998.48 | 19.47 |           |       |
| -25158.15 | -0.11 | -25125.91 | 4.12 | -25093.74 | 8.27  |           |       | -25026.32 | 19.65 | -24997.11 | 20.84 |           |       |
| -25157.65 | 0.40  | -25125.40 | 4.63 | -25094.25 | 7.75  |           |       | -25027.42 | 18.55 | -24995.68 | 22.27 |           |       |
| -25157.82 | 0.23  | -25125.41 | 4.62 | -25089.25 | 12.75 |           |       | -25028.18 | 17.78 | -24995.41 | 22.54 |           |       |
| -25156.94 | 1.11  | -25126.23 | 3.80 | -25094.92 | 7.08  |           |       | -25031.30 | 14.67 | -24998.75 | 19.20 |           |       |
| -25158.34 | -0.30 | -25124.66 | 5.36 | -25092.50 | 9.51  |           |       | -25027.25 | 18.72 | -24997.14 | 20.81 |           |       |
| -25157.99 | 0.05  | -25126.38 | 3.64 | -25089.85 | 12.16 |           |       | -25023.12 | 22.85 |           |       |           |       |
| -25158.59 | -0.55 | -25126.83 | 3.19 | -25092.85 | 9.15  |           |       | -25032.66 | 13.31 |           |       |           |       |
| -25157.72 | 0.33  | -25125.13 | 4.90 | -25089.49 | 12.52 |           |       | -25026.07 | 19.90 |           |       |           |       |
| -25158.14 | -0.09 | -25123.20 | 6.82 | -25091.94 | 10.07 |           |       | -25026.85 | 19.12 |           |       |           |       |
| -25158.86 | -0.82 |           |      | -25092.27 | 9.74  |           |       | -25028.25 | 17.72 |           |       |           |       |
| -25156.11 | 1.93  |           |      |           |       |           |       | -25024.90 | 21.07 |           |       |           |       |
|           |       |           |      |           |       |           |       | -25030.67 | 15.30 |           |       |           |       |

|                  |           |      |           |      |           |      |           |       |           |       |           |       |           |       |
|------------------|-----------|------|-----------|------|-----------|------|-----------|-------|-----------|-------|-----------|-------|-----------|-------|
| Average energies | -25156.64 | 1.40 | -25124.96 | 5.06 | -25092.61 | 9.39 | -25060.23 | 13.76 | -25028.11 | 17.86 | -24996.37 | 21.58 | -24979.96 | 23.98 |
|------------------|-----------|------|-----------|------|-----------|------|-----------|-------|-----------|-------|-----------|-------|-----------|-------|

# Ca<sub>1-x</sub>M<sub>x</sub>ZrTi<sub>2-2x</sub>Al<sub>2x</sub>O<sub>7</sub> M=(Ce, Pu, Th, U)

## Ti(2)Ti(3)

N.B. All stated energies are in eV

| Ce                                  | ground | solid     |       |           |       |           |       |           |      |           |      |           |       |
|-------------------------------------|--------|-----------|-------|-----------|-------|-----------|-------|-----------|------|-----------|------|-----------|-------|
|                                     | state  | solution  |       |           |       |           |       |           |      |           |      |           |       |
|                                     | energy | energy    |       |           |       |           |       |           |      |           |      |           |       |
| concentration in solid solution (%) | 3      | 6         | 9     |           | 12    |           | 15    |           | 18   |           | 21   |           |       |
| number of atoms                     | 2      | 4         | 6     |           | 8     |           | 10    |           | 12   |           | 13   |           |       |
| -25156.65                           | -3.27  | -25119.64 | 1.06  | -25085.66 | 2.35  | -25051.93 | 3.41  | -25017.34 | 5.31 | -24987.77 | 2.20 | -24968.59 | 5.04  |
| -25157.69                           | -4.31  | -25122.66 | -1.96 | -25086.90 | 1.11  | -25051.47 | 3.86  | -25019.91 | 2.74 | -24986.27 | 3.70 | -24966.11 | 7.51  |
| -25156.49                           | -3.11  | -25122.91 | -2.21 | -25089.01 | -0.99 | -25053.71 | 1.62  | -25020.16 | 2.49 | -24983.84 | 6.13 | -24970.93 | 2.70  |
| -25156.66                           | -3.28  | -25122.74 | -2.05 | -25088.16 | -0.15 | -25052.61 | 2.73  | -25015.15 | 7.51 | -24987.63 | 2.33 | -24963.29 | 10.34 |
| -25156.85                           | -3.47  | -25121.96 | -1.26 | -25089.32 | -1.31 | -25054.86 | 0.47  | -25019.08 | 3.57 | -24985.85 | 4.12 | -24966.13 | 7.50  |
| -25157.70                           | -4.32  | -25121.22 | -0.52 | -25085.64 | 2.37  | -25049.20 | 6.13  | -25013.10 | 9.56 | -24984.38 | 5.59 | -24966.48 | 7.15  |
| -25156.80                           | -3.42  | -25121.88 | -1.18 | -25087.02 | 1.00  | -25055.95 | -0.61 | -25018.75 | 3.90 | -24984.61 | 5.36 | -24963.99 | 9.64  |
| -25155.64                           | -2.26  | -25122.37 | -1.67 | -25088.56 | -0.55 | -25052.87 | 2.46  | -25019.10 | 3.55 | -24983.74 | 6.23 | -24969.76 | 3.87  |
| -25155.73                           | -2.35  | -25122.67 | -1.98 | -25089.57 | -1.56 | -25050.69 | 4.64  | -25021.74 | 0.91 | -24984.27 | 5.70 | -24969.54 | 4.09  |
| -25156.00                           | -2.62  | -25122.13 | -1.43 | -25086.86 | 1.16  | -25051.77 | 3.56  | -25017.24 | 5.41 | -24982.20 | 7.77 | -24969.29 | 4.33  |
| -25155.55                           | -2.17  | -25122.41 | -1.71 | -25087.80 | 0.22  | -25051.92 | 3.41  | -25016.29 | 6.36 | -24980.13 | 9.83 | -24968.73 | 4.90  |
| -25156.65                           | -3.27  | -25122.59 | -1.89 | -25086.33 | 1.69  | -25054.73 | 0.60  | -25018.44 | 4.21 | -24986.71 | 3.26 | -24970.89 | 2.73  |
| -25157.36                           | -3.98  | -25122.66 | -1.96 | -25088.16 | -0.15 | -25055.29 | 0.04  | -25018.08 | 4.57 | -24984.96 | 5.01 | -24968.58 | 5.05  |
| -25157.34                           | -3.96  | -25122.42 | -1.72 | -25086.68 | 1.34  | -25055.32 | 0.01  | -25021.73 | 0.92 | -24984.27 | 5.70 | -24969.07 | 4.55  |
| -25156.81                           | -3.43  | -25122.26 | -1.56 | -25086.44 | 1.57  | -25054.36 | 0.97  | -25018.75 | 3.90 | -24987.03 | 2.93 | -24964.18 | 9.44  |
| -25157.33                           | -3.95  | -25120.83 | -0.13 | -25088.01 | 0.00  | -25049.91 | 5.43  | -25019.99 | 2.66 | -24982.40 | 7.57 | -24968.43 | 5.20  |
| -25156.22                           | -2.84  | -25121.50 | -0.81 | -25088.25 | -0.24 | -25051.83 | 3.50  | -25016.59 | 6.06 | -24985.40 | 4.57 | -24972.23 | 1.40  |
| -25156.93                           | -3.55  | -25121.78 | -1.08 | -25087.41 | 0.60  | -25054.17 | 1.17  | -25017.51 | 5.14 | -24984.88 | 5.09 | -24966.60 | 7.03  |
| -25155.55                           | -2.17  | -25123.09 | -2.40 | -25087.50 | 0.52  | -25053.14 | 2.19  | -25013.20 | 9.45 | -24982.39 | 7.58 | -24970.03 | 3.60  |
| -25155.32                           | -1.94  | -25122.88 | -2.19 | -25087.49 | 0.53  | -25054.29 | 1.04  | -25019.48 | 3.17 | -24985.30 | 4.67 | -24964.85 | 8.78  |
| -25157.32                           | -3.94  | -25121.48 | -0.78 | -25087.35 | 0.66  | -25052.17 | 3.16  | -25018.43 | 4.22 | -24989.65 | 0.32 | -24965.48 | 8.14  |
| -25156.98                           | -3.60  | -25122.11 | -1.41 | -25085.19 | 2.82  | -25053.33 | 2.00  | -25020.28 | 2.37 | -24985.34 | 4.63 | -24962.89 | 10.74 |
| -25158.19                           | -4.81  | -25123.24 | -2.55 | -25087.70 | 0.31  | -25053.40 | 1.93  | -25017.42 | 5.23 | -24982.43 | 7.54 | -24970.24 | 3.38  |
| -25156.63                           | -3.25  | -25121.07 | -0.38 | -25084.64 | 3.38  | -25052.52 | 2.81  | -25019.04 | 3.61 | -24986.54 | 3.43 | -24969.01 | 4.62  |
| -25156.95                           | -3.57  | -25121.52 | -0.82 | -25088.69 | -0.67 | -25051.28 | 4.05  | -25019.53 | 3.12 | -24981.98 | 7.99 | -24968.15 | 5.47  |
| -25156.27                           | -2.89  | -25124.58 | -3.88 | -25088.16 | -0.14 | -25053.12 | 2.22  | -25020.02 | 2.63 | -24986.96 | 3.01 | -24962.72 | 10.91 |
| -25157.23                           | -3.85  | -25122.14 | -1.44 | -25089.07 | -1.06 | -25047.21 | 8.12  | -25014.59 | 8.06 | -24982.25 | 7.72 | -24968.89 | 4.73  |
| -25157.29                           | -3.91  | -25120.91 | -0.21 | -25087.14 | 0.88  | -25053.98 | 1.35  | -25018.65 | 4.01 | -24986.03 | 3.94 | -24969.34 | 4.29  |
| -25155.52                           | -2.14  | -25122.55 | -1.85 | -25087.62 | 0.39  | -25054.46 | 0.88  | -25018.62 | 4.04 | -24988.55 | 1.42 | -24968.62 | 5.01  |

|           |       |           |       |           |       |           |       |           |       |           |      |           |       |
|-----------|-------|-----------|-------|-----------|-------|-----------|-------|-----------|-------|-----------|------|-----------|-------|
| -25156.47 | -3.09 | -25122.55 | -1.85 | -25086.17 | 1.84  | -25054.03 | 1.30  | -25015.40 | 7.25  | -24984.26 | 5.71 | -24967.70 | 5.92  |
| -25156.49 | -3.11 | -25122.01 | -1.31 | -25088.03 | -0.01 | -25053.07 | 2.27  | -25019.43 | 3.22  | -24985.35 | 4.62 | -24965.73 | 7.90  |
| -25151.93 | 1.45  | -25122.26 | -1.56 | -25087.34 | 0.68  | -25054.80 | 0.53  | -25018.13 | 4.52  | -24986.48 | 3.48 | -24965.73 | 7.90  |
| -25157.88 | -4.50 | -25121.66 | -0.96 | -25088.39 | -0.37 | -25052.76 | 2.57  | -25015.26 | 7.39  | -24984.16 | 5.81 | -24968.47 | 5.16  |
| -25156.27 | -2.89 | -25121.37 | -0.67 | -25086.92 | 1.09  | -25054.91 | 0.43  | -25014.79 | 7.86  | -24984.91 | 5.06 | -24967.55 | 6.08  |
| -25156.58 | -3.20 | -25122.76 | -2.06 | -25084.00 | 4.01  | -25051.36 | 3.97  | -25020.21 | 2.44  | -24984.93 | 5.04 | -24963.68 | 9.95  |
| -25156.61 | -3.23 | -25122.66 | -1.96 | -25089.16 | -1.14 | -25053.20 | 2.13  | -25020.15 | 2.51  | -24987.77 | 2.20 | -24971.33 | 2.30  |
| -25156.00 | -2.62 | -25121.12 | -0.43 | -25087.16 | 0.85  | -25052.14 | 3.20  | -25021.55 | 1.10  | -24986.46 | 3.50 | -24967.18 | 6.45  |
| -25155.89 | -2.51 | -25120.21 | 0.49  | -25088.94 | -0.92 | -25053.73 | 1.61  | -25019.64 | 3.01  | -24986.54 | 3.43 | -24968.92 | 4.71  |
| -25156.76 | -3.38 | -25121.25 | -0.55 | -25084.69 | 3.32  | -25051.06 | 4.28  | -25018.81 | 3.84  | -24985.65 | 4.32 | -24963.91 | 9.72  |
| -25156.53 | -3.15 | -25120.87 | -0.18 | -25086.73 | 1.28  | -25051.95 | 3.39  | -25018.66 | 3.99  | -24981.87 | 8.10 | -24968.05 | 5.57  |
| -25156.86 | -3.48 | -25122.69 | -1.99 | -25087.38 | 0.64  | -25047.94 | 7.40  | -25022.90 | -0.25 | -24984.53 | 5.44 | -24968.61 | 5.02  |
| -25157.38 | -4.00 | -25122.73 | -2.03 | -25088.06 | -0.04 | -25056.78 | -1.45 | -25021.36 | 1.29  | -24987.87 | 2.10 | -24966.99 | 6.63  |
| -25157.39 | -4.01 | -25122.87 | -2.17 | -25089.05 | -1.04 | -25055.56 | -0.22 | -25020.08 | 2.57  | -24986.56 | 3.41 | -24971.89 | 1.74  |
| -25157.72 | -4.34 | -25120.18 | 0.52  | -25086.33 | 1.69  | -25055.87 | -0.54 | -25013.80 | 8.85  | -24986.05 | 3.92 | -24964.24 | 9.39  |
| -25156.20 | -2.82 | -25123.64 | -2.95 | -25086.57 | 1.45  | -25054.47 | 0.86  | -25020.18 | 2.47  | -24985.18 | 4.79 | -24968.41 | 5.21  |
| -25155.72 | -2.34 | -25123.14 | -2.44 | -25089.58 | -1.56 | -25051.83 | 3.50  | -25022.25 | 0.40  | -24980.00 | 9.96 | -24968.89 | 4.74  |
| -25156.48 | -3.10 | -25121.92 | -1.23 | -25086.80 | 1.22  | -25052.28 | 3.06  | -25018.58 | 4.07  | -24980.69 | 9.28 | -24966.44 | 7.19  |
| -25156.76 | -3.39 | -25120.47 | 0.23  | -25088.04 | -0.03 | -25051.09 | 4.24  | -25016.17 | 6.48  | -24984.94 | 5.03 | -24968.41 | 5.22  |
| -25156.87 | -3.49 | -25122.26 | -1.56 | -25089.32 | -1.31 | -25053.31 | 2.02  | -25018.49 | 4.16  | -24987.12 | 2.85 | -24970.96 | 2.67  |
| -25156.78 | -3.40 | -25122.95 | -2.25 | -25085.39 | 2.63  | -25052.42 | 2.92  | -25021.32 | 1.34  | -24985.07 | 4.90 | -24963.14 | 10.49 |
| -25156.73 | -3.35 | -25121.31 | -0.62 | -25088.99 | -0.97 | -25056.54 | -1.21 | -25018.96 | 3.69  | -24981.69 | 8.28 | -24963.99 | 9.64  |
| -25156.42 | -3.05 | -25121.27 | -0.57 | -25088.75 | -0.74 | -25052.93 | 2.40  | -25019.92 | 2.73  | -24987.23 | 2.74 | -24968.01 | 5.62  |
| -25156.90 | -3.52 | -25122.29 | -1.60 | -25084.87 | 3.15  | -25053.76 | 1.57  | -25018.70 | 3.95  | -24982.93 | 7.04 | -24968.07 | 5.56  |
| -25157.79 | -4.41 | -25123.26 | -2.56 | -25086.42 | 1.59  | -25056.46 | -1.13 | -25021.93 | 0.72  | -24988.81 | 1.16 | -24968.07 | 5.56  |
| -25154.20 | -0.82 | -25122.86 | -2.16 | -25086.40 | 1.62  | -25054.61 | 0.72  | -25017.55 | 5.10  | -24983.12 | 6.85 | -24968.79 | 4.84  |
| -25156.86 | -3.48 | -25122.67 | -1.97 | -25086.88 | 1.14  | -25055.40 | -0.06 | -25016.59 | 6.06  | -24986.90 | 3.07 | -24970.41 | 3.22  |
| -25158.08 | -4.70 | -25122.86 | -2.16 | -25087.00 | 1.02  | -25051.15 | 4.19  | -25020.47 | 2.19  | -24984.65 | 5.32 | -24969.51 | 4.12  |
| -25156.06 | -2.68 | -25121.48 | -0.78 | -25087.83 | 0.19  | -25049.57 | 5.77  | -25018.34 | 4.31  | -24985.26 | 4.71 | -24966.35 | 7.28  |
| -25156.54 | -3.16 | -25123.33 | -2.63 | -25089.67 | -1.65 | -25054.32 | 1.01  | -25017.71 | 4.95  | -24983.20 | 6.77 | -24969.65 | 3.98  |
| -25157.07 | -3.69 | -25122.82 | -2.13 | -25086.77 | 1.25  | -25053.83 | 1.51  | -25016.24 | 6.41  | -24986.44 | 3.53 | -24965.11 | 8.52  |
| -25155.11 | -1.73 | -25118.74 | 1.96  | -25090.43 | -2.42 | -25053.99 | 1.34  | -25018.86 | 3.79  | -24980.89 | 9.08 | -24969.36 | 4.27  |
| -25155.06 | -1.68 | -25118.67 | 2.03  | -25088.94 | -0.92 | -25046.58 | 8.75  | -25020.02 | 2.64  | -24986.09 | 3.88 | -24967.41 | 6.22  |
| -25158.02 | -4.64 | -25120.85 | -0.15 | -25087.70 | 0.32  | -25052.46 | 2.88  | -25018.74 | 3.91  | -24987.44 | 2.53 | -24961.82 | 11.81 |
| -25156.17 | -2.79 | -25122.12 | -1.42 | -25086.54 | 1.48  | -25050.54 | 4.79  | -25019.48 | 3.17  | -24983.19 | 6.78 | -24963.31 | 10.32 |
| -25155.80 | -2.42 | -25121.06 | -0.36 | -25088.29 | -0.27 | -25055.89 | -0.55 | -25020.25 | 2.40  | -24984.91 | 5.06 | -24970.56 | 3.07  |
| -25155.86 | -2.48 | -25121.08 | -0.38 | -25087.12 | 0.90  | -25053.57 | 1.77  | -25018.57 | 4.08  | -24988.39 | 1.58 | -24969.77 | 3.86  |
| -25158.04 | -4.66 | -25123.46 | -2.76 | -25086.66 | 1.35  | -25054.99 | 0.35  | -25020.40 | 2.25  | -24983.15 | 6.82 | -24968.35 | 5.28  |
| -25155.28 | -1.90 | -25122.36 | -1.67 | -25089.70 | -1.69 | -25054.13 | 1.20  | -25017.24 | 5.41  | -24984.07 | 5.90 | -24963.58 | 10.05 |
| -25157.18 | -3.80 | -25123.70 | -3.00 | -25085.91 | 2.10  | -25053.58 | 1.75  | -25023.49 | -0.84 | -24985.95 | 4.01 | -24968.32 | 5.31  |
| -25156.61 | -3.23 | -25120.70 | -0.01 | -25088.50 | -0.48 | -25046.38 | 8.96  | -25021.98 | 0.67  | -24986.23 | 3.74 | -24970.28 | 3.34  |



|           |       |           |       |           |       |           |       |           |       |           |       |           |       |
|-----------|-------|-----------|-------|-----------|-------|-----------|-------|-----------|-------|-----------|-------|-----------|-------|
| -25156.64 | -3.26 | -25121.82 | -1.12 | -25086.48 | 1.53  | -25054.56 | 0.78  | -25017.87 | 4.78  | -24982.07 | 7.89  | -24969.75 | 3.88  |
| -25156.49 | -3.11 | -25121.28 | -0.58 | -25089.16 | -1.15 | -25055.36 | -0.03 | -25018.14 | 4.51  | -24981.83 | 8.14  | -24969.81 | 3.82  |
| -25155.64 | -2.26 | -25123.60 | -2.91 | -25088.99 | -0.97 | -25048.56 | 6.77  | -25020.42 | 2.23  | -24980.04 | 9.93  | -24964.52 | 9.11  |
| -25156.84 | -3.46 | -25122.94 | -2.24 | -25087.17 | 0.85  | -25054.12 | 1.22  | -25019.03 | 3.62  | -24988.25 | 1.72  | -24967.32 | 6.31  |
| -25155.81 | -2.43 | -25120.25 | 0.45  | -25086.96 | 1.06  | -25050.82 | 4.51  | -25020.10 | 2.56  | -24984.91 | 5.06  | -24971.00 | 2.63  |
| -25158.06 | -4.68 | -25123.18 | -2.48 | -25088.51 | -0.49 | -25053.91 | 1.42  | -25019.86 | 2.79  | -24986.75 | 3.22  | -24968.36 | 5.27  |
| -25155.80 | -2.42 | -25120.18 | 0.52  | -25090.14 | -2.12 | -25053.38 | 1.95  | -25018.41 | 4.24  | -24988.51 | 1.45  | -24968.92 | 4.70  |
| -25155.39 | -2.02 | -25123.70 | -3.00 | -25086.88 | 1.13  | -25054.55 | 0.78  | -25020.96 | 1.69  | -24983.20 | 6.77  | -24970.15 | 3.48  |
| -25155.93 | -2.55 | -25123.34 | -2.64 | -25084.20 | 3.82  | -25051.16 | 4.17  | -25021.72 | 0.93  | -24988.27 | 1.69  | -24966.36 | 7.27  |
| -25156.94 | -3.57 | -25122.71 | -2.02 | -25085.22 | 2.79  | -25053.87 | 1.47  | -25020.55 | 2.10  | -24984.96 | 5.01  | -24965.26 | 8.37  |
| -25157.78 | -4.40 | -25122.18 | -1.49 | -25087.71 | 0.31  | -25053.96 | 1.37  | -25019.19 | 3.46  | -24979.39 | 10.58 | -24968.19 | 5.44  |
| -25157.06 | -3.68 | -25120.69 | 0.01  | -25085.07 | 2.95  | -25049.93 | 5.40  | -25019.09 | 3.56  | -24985.02 | 4.95  | -24968.64 | 4.99  |
| -25156.99 | -3.61 | -25122.34 | -1.64 | -25086.89 | 1.13  | -25055.93 | -0.60 | -25019.63 | 3.02  | -24987.10 | 2.87  | -24967.47 | 6.16  |
| -25156.43 | -3.05 | -25120.22 | 0.48  | -25086.44 | 1.58  | -25053.98 | 1.35  | -25017.46 | 5.19  | -24985.88 | 4.09  | -24967.81 | 5.82  |
| -25156.16 | -2.78 | -25121.72 | -1.02 | -25089.05 | -1.04 | -25054.55 | 0.78  | -25022.30 | 0.35  | -24984.98 | 4.99  | -24966.96 | 6.66  |
| -25157.05 | -3.67 | -25120.12 | 0.58  | -25086.65 | 1.36  | -25053.32 | 2.02  | -25018.62 | 4.03  | -24984.70 | 5.27  | -24967.28 | 6.35  |
| -25156.71 | -3.33 | -25121.79 | -1.09 | -25086.96 | 1.05  | -25052.77 | 2.56  | -25019.37 | 3.29  | -24986.45 | 3.52  | -24970.48 | 3.14  |
| -25156.32 | -2.94 | -25122.52 | -1.82 | -25087.43 | 0.59  | -25054.25 | 1.09  | -25021.06 | 1.59  | -24983.46 | 6.51  | -24967.44 | 6.19  |
| -25156.71 | -3.34 | -25120.78 | -0.08 | -25088.49 | -0.48 | -25053.56 | 1.77  | -25020.39 | 2.26  | -24985.71 | 4.26  | -24963.45 | 10.18 |
| -25155.99 | -2.61 | -25123.44 | -2.74 | -25086.96 | 1.05  | -25056.33 | -1.00 | -25017.10 | 5.55  | -24986.80 | 3.17  | -24971.01 | 2.62  |
| -25157.89 | -4.51 | -25122.41 | -1.72 | -25087.68 | 0.34  | -25051.64 | 3.69  | -25010.14 | 12.51 | -24985.25 | 4.72  | -24965.88 | 7.74  |
| -25156.72 | -3.34 | -25123.73 | -3.03 | -25089.36 | -1.35 | -25053.20 | 2.13  | -25018.72 | 3.93  | -24985.13 | 4.84  | -24971.71 | 1.92  |
| -25157.10 | -3.72 | -25122.23 | -1.53 | -25087.33 | 0.69  | -25053.13 | 2.21  | -25015.66 | 6.99  | -24984.27 | 5.70  | -24964.46 | 9.16  |
| -25156.36 | -2.98 | -25122.33 | -1.63 | -25089.95 | -1.93 | -25047.48 | 7.86  | -25019.72 | 2.93  | -24986.33 | 3.64  | -24961.88 | 11.75 |
| -25157.62 | -4.24 | -25121.22 | -0.52 | -25089.98 | -1.97 | -25055.12 | 0.21  | -25020.11 | 2.54  | -24983.41 | 6.56  | -24964.56 | 9.07  |
| -25156.88 | -3.50 | -25123.37 | -2.67 | -25090.08 | -2.06 | -25053.63 | 1.70  | -25018.41 | 4.24  | -24985.93 | 4.04  | -24967.30 | 6.32  |
| -25156.49 | -3.11 | -25123.04 | -2.35 | -25088.42 | -0.41 | -25054.09 | 1.25  | -25020.21 | 2.44  | -24984.66 | 5.31  | -24967.23 | 6.40  |
| -25156.06 | -2.68 | -25123.03 | -2.33 | -25088.98 | -0.96 | -25049.94 | 5.39  | -25020.29 | 2.36  | -24988.48 | 1.49  | -24965.59 | 8.04  |
| -25156.69 | -3.31 | -25121.38 | -0.69 | -25083.61 | 4.40  | -25049.24 | 6.10  | -25022.79 | -0.14 | -24984.94 | 5.02  | -24968.42 | 5.20  |
| -25155.27 | -1.89 | -25122.45 | -1.76 | -25088.41 | -0.40 | -25055.10 | 0.24  | -25018.73 | 3.92  | -24986.51 | 3.45  | -24966.99 | 6.64  |
| -25156.58 | -3.20 | -25123.26 | -2.56 | -25088.92 | -0.90 | -25053.13 | 2.21  | -25019.01 | 3.64  | -24987.08 | 2.89  | -24971.13 | 2.50  |
| -25157.00 | -3.62 | -25123.25 | -2.55 | -25087.68 | 0.34  | -25051.87 | 3.47  | -25017.19 | 5.46  | -24979.74 | 10.23 | -24967.74 | 5.89  |
| -25156.93 | -3.55 | -25123.16 | -2.46 | -25083.22 | 4.79  | -25048.40 | 6.93  | -25017.51 | 5.14  | -24986.42 | 3.55  | -24968.19 | 5.43  |
| -25156.45 | -3.07 | -25122.72 | -2.02 | -25089.44 | -1.42 | -25053.95 | 1.39  | -25020.65 | 2.00  | -24985.35 | 4.62  | -24969.31 | 4.31  |
| -25157.07 | -3.69 | -25122.66 | -1.96 | -25087.12 | 0.90  | -25051.75 | 3.58  | -25020.01 | 2.65  | -24984.19 | 5.78  | -24969.80 | 3.83  |
| -25156.83 | -3.45 | -25120.91 | -0.22 | -25086.60 | 1.42  | -25051.50 | 3.83  | -25018.25 | 4.40  | -24983.81 | 6.16  | -24965.55 | 8.08  |
| -25157.85 | -4.47 | -25122.07 | -1.37 | -25089.06 | -1.04 | -25053.66 | 1.68  | -25017.39 | 5.26  | -24985.03 | 4.94  | -24969.13 | 4.50  |
| -25157.17 | -3.79 | -25122.89 | -2.19 | -25086.87 | 1.15  | -25056.10 | -0.76 | -25017.24 | 5.41  | -24988.35 | 1.61  | -24960.14 | 13.49 |
| -25156.47 | -3.09 | -25121.57 | -0.87 | -25089.27 | -1.26 | -25052.87 | 2.47  | -25016.33 | 6.32  | -24981.92 | 8.05  | -24967.97 | 5.65  |
| -25157.56 | -4.18 | -25122.57 | -1.87 | -25087.84 | 0.18  | -25052.31 | 3.03  | -25017.76 | 4.89  | -24985.08 | 4.89  | -24968.44 | 5.19  |
| -25157.20 | -3.82 | -25121.23 | -0.53 | -25086.21 | 1.80  | -25052.82 | 2.51  | -25013.06 | 9.59  | -24985.97 | 4.00  | -24963.81 | 9.82  |

|           |       |           |       |           |       |           |       |           |      |           |       |           |       |
|-----------|-------|-----------|-------|-----------|-------|-----------|-------|-----------|------|-----------|-------|-----------|-------|
| -25157.36 | -3.98 | -25122.55 | -1.85 | -25087.99 | 0.02  | -25056.63 | -1.30 | -25019.52 | 3.13 | -24989.14 | 0.83  | -24963.47 | 10.15 |
| -25156.77 | -3.39 | -25121.55 | -0.85 | -25088.11 | -0.09 | -25053.41 | 1.92  | -25018.81 | 3.84 | -24983.87 | 6.10  | -24968.58 | 5.05  |
| -25154.88 | -1.50 | -25121.99 | -1.29 | -25086.71 | 1.30  | -25055.71 | -0.38 | -25017.92 | 4.73 | -24987.49 | 2.48  | -24968.66 | 4.97  |
| -25156.09 | -2.71 | -25120.29 | 0.40  | -25089.43 | -1.41 | -25055.35 | -0.02 | -25018.82 | 3.83 | -24978.35 | 11.62 | -24969.74 | 3.89  |
| -25155.90 | -2.52 | -25121.01 | -0.32 | -25087.61 | 0.41  | -25052.25 | 3.08  | -25015.89 | 6.76 | -24981.49 | 8.48  | -24967.92 | 5.71  |
| -25156.18 | -2.80 | -25122.62 | -1.92 | -25089.57 | -1.56 | -25053.66 | 1.67  | -25020.91 | 1.74 | -24985.05 | 4.92  | -24967.65 | 5.97  |
| -25157.11 | -3.73 | -25122.41 | -1.72 | -25087.42 | 0.59  |           |       |           |      | -24983.42 | 6.55  | -24968.34 | 5.28  |
| -25154.57 | -1.19 |           |       |           |       |           |       |           |      |           |       |           |       |

Average energies      -25156.58      -3.20      -25122.06      -1.36      -25087.56      0.46      -25053.02      2.31      -25018.74      3.91      -24984.96      5.01      -24967.54      6.09

## Pu

ground    solid  
state      solution  
energy    energy

concentration in solid solution (%)  
number of atoms

|           | 3     | 6         | 9     | 12        | 15    | 18        | 21    |           |      |           |       |           |       |
|-----------|-------|-----------|-------|-----------|-------|-----------|-------|-----------|------|-----------|-------|-----------|-------|
|           | 2     | 4         | 6     | 8         | 10    | 12        | 13    |           |      |           |       |           |       |
| -25152.06 | -4.67 | -25110.35 | -1.63 | -25069.96 | 0.10  | -25029.45 | 1.94  | -24990.22 | 2.51 | -24950.35 | 3.70  | -24930.27 | 4.46  |
| -25150.77 | -3.38 | -25109.29 | -0.56 | -25070.84 | -0.78 | -25032.65 | -1.25 | -24989.59 | 3.13 | -24948.18 | 5.88  | -24922.05 | 12.67 |
| -25148.77 | -1.38 | -25110.75 | -2.02 | -25066.49 | 3.56  | -25028.58 | 2.81  | -24990.96 | 1.76 | -24951.84 | 2.22  | -24931.09 | 3.63  |
| -25150.74 | -3.34 | -25110.45 | -1.73 | -25071.56 | -1.50 | -25032.91 | -1.52 | -24990.76 | 1.96 | -24954.83 | -0.77 | -24930.86 | 3.86  |
| -25151.07 | -3.67 | -25110.56 | -1.83 | -25071.18 | -1.12 | -25028.45 | 2.94  | -24988.71 | 4.02 | -24947.56 | 6.49  | -24930.84 | 3.88  |
| -25151.28 | -3.88 | -25110.82 | -2.09 | -25068.13 | 1.93  | -25029.55 | 1.84  | -24992.21 | 0.51 | -24951.71 | 2.35  | -24926.48 | 8.25  |
| -25151.61 | -4.21 | -25110.30 | -1.58 | -25067.85 | 2.21  | -25027.52 | 3.87  | -24988.45 | 4.28 | -24948.98 | 5.08  | -24930.42 | 4.31  |
| -25151.33 | -3.94 | -25110.60 | -1.87 | -25070.93 | -0.87 | -25030.78 | 0.61  | -24992.69 | 0.03 | -24946.45 | 7.61  | -24929.79 | 4.93  |
| -25150.79 | -3.40 | -25110.36 | -1.64 | -25071.82 | -1.76 | -25029.21 | 2.18  | -24991.41 | 1.31 | -24951.63 | 2.43  | -24933.32 | 1.40  |
| -25151.08 | -3.69 | -25110.74 | -2.01 | -25070.65 | -0.59 | -25030.24 | 1.15  | -24990.93 | 1.80 | -24944.31 | 9.75  | -24933.30 | 1.43  |
| -25152.79 | -5.40 | -25110.59 | -1.86 | -25069.00 | 1.06  | -25031.21 | 0.18  | -24992.11 | 0.62 | -24947.85 | 6.20  | -24932.06 | 2.66  |
| -25150.57 | -3.17 | -25111.09 | -2.36 | -25068.26 | 1.80  | -25028.73 | 2.66  | -24989.73 | 2.99 | -24946.90 | 7.15  | -24928.81 | 5.91  |
| -25148.09 | -0.70 | -25108.80 | -0.07 | -25070.86 | -0.80 | -25029.69 | 1.70  | -24989.77 | 2.95 | -24950.79 | 3.27  | -24930.54 | 4.18  |
| -25151.58 | -4.18 | -25110.29 | -1.56 | -25066.98 | 3.08  | -25030.86 | 0.53  | -24989.15 | 3.57 | -24948.88 | 5.17  | -24927.90 | 6.82  |
| -25151.30 | -3.91 | -25109.91 | -1.18 | -25069.31 | 0.74  | -25032.25 | -0.86 | -24989.40 | 3.33 | -24949.18 | 4.87  | -24928.81 | 5.91  |
| -25151.83 | -4.43 | -25111.03 | -2.31 | -25070.55 | -0.49 | -25029.62 | 1.77  | -24989.55 | 3.18 | -24952.52 | 1.54  | -24930.75 | 3.98  |
| -25151.56 | -4.17 | -25109.27 | -0.54 | -25071.57 | -1.51 | -25029.90 | 1.49  | -24990.40 | 2.33 | -24946.26 | 7.79  | -24929.86 | 4.86  |
| -25150.73 | -3.34 | -25108.87 | -0.14 | -25070.87 | -0.81 | -25028.25 | 3.14  | -24989.62 | 3.10 | -24950.45 | 3.60  | -24931.80 | 2.93  |
| -25151.98 | -4.58 | -25110.98 | -2.26 | -25068.56 | 1.50  | -25027.04 | 4.35  | -24990.75 | 1.98 | -24951.34 | 2.72  | -24930.40 | 4.32  |
| -25151.08 | -3.69 | -25110.84 | -2.12 | -25071.33 | -1.27 | -25030.90 | 0.49  | -24989.68 | 3.05 | -24953.44 | 0.61  | -24930.33 | 4.40  |
| -25150.42 | -3.03 | -25107.83 | 0.89  | -25069.35 | 0.71  | -25030.69 | 0.70  | -24989.10 | 3.63 | -24951.34 | 2.71  | -24927.82 | 6.90  |
| -25150.13 | -2.74 | -25111.06 | -2.33 | -25071.89 | -1.83 | -25030.88 | 0.51  | -24990.06 | 2.66 | -24954.71 | -0.65 | -24925.40 | 9.32  |
| -25151.53 | -4.13 | -25111.67 | -2.95 | -25070.62 | -0.56 | -25031.09 | 0.31  | -24989.18 | 3.54 | -24948.15 | 5.91  | -24932.77 | 1.95  |
| -25150.74 | -3.35 | -25109.92 | -1.19 | -25071.64 | -1.58 | -25031.15 | 0.25  | -24989.81 | 2.91 | -24952.05 | 2.01  | -24929.35 | 5.37  |

|           |       |           |       |           |       |           |       |           |       |           |      |           |      |
|-----------|-------|-----------|-------|-----------|-------|-----------|-------|-----------|-------|-----------|------|-----------|------|
| -25150.75 | -3.35 | -25111.02 | -2.29 | -25069.94 | 0.12  | -25030.59 | 0.80  | -24990.38 | 2.35  | -24947.34 | 6.71 | -24929.70 | 5.02 |
| -25151.20 | -3.80 | -25109.92 | -1.19 | -25070.73 | -0.67 | -25031.15 | 0.24  | -24991.84 | 0.88  | -24950.68 | 3.38 | -24929.21 | 5.52 |
| -25151.44 | -4.04 | -25110.23 | -1.50 | -25070.30 | -0.24 | -25029.81 | 1.58  | -24993.30 | -0.58 | -24949.25 | 4.80 | -24933.80 | 0.92 |
| -25151.62 | -4.23 | -25110.66 | -1.93 | -25068.85 | 1.21  | -25027.56 | 3.83  | -24990.45 | 2.27  | -24949.59 | 4.46 | -24931.85 | 2.87 |
| -25151.25 | -3.86 | -25110.61 | -1.88 | -25069.26 | 0.80  | -25028.88 | 2.51  | -24990.39 | 2.34  | -24948.94 | 5.12 | -24932.20 | 2.52 |
| -25150.40 | -3.01 | -25112.03 | -3.30 | -25071.66 | -1.60 | -25030.41 | 0.98  | -24988.92 | 3.80  | -24948.10 | 5.95 | -24932.06 | 2.66 |
| -25149.74 | -2.34 | -25110.37 | -1.65 | -25069.08 | 0.98  | -25028.00 | 3.39  | -24990.41 | 2.31  | -24947.89 | 6.16 | -24928.80 | 5.92 |
| -25151.68 | -4.29 | -25109.63 | -0.91 | -25070.42 | -0.36 | -25032.64 | -1.25 | -24991.48 | 1.25  | -24951.07 | 2.99 | -24931.76 | 2.96 |
| -25150.28 | -2.88 | -25112.16 | -3.43 | -25071.63 | -1.57 | -25030.91 | 0.48  | -24987.78 | 4.94  | -24947.95 | 6.11 | -24930.42 | 4.30 |
| -25150.00 | -2.60 | -25110.64 | -1.91 | -25069.22 | 0.84  | -25029.44 | 1.95  | -24992.26 | 0.47  | -24951.80 | 2.26 | -24925.34 | 9.38 |
| -25150.26 | -2.86 | -25110.83 | -2.11 | -25068.69 | 1.37  | -25026.99 | 4.40  | -24988.53 | 4.20  | -24952.62 | 1.43 | -24929.64 | 5.08 |
| -25150.84 | -3.45 | -25109.89 | -1.17 | -25071.12 | -1.06 | -25028.87 | 2.52  | -24989.96 | 2.76  | -24948.57 | 5.49 | -24931.55 | 3.17 |
| -25151.31 | -3.92 | -25111.37 | -2.65 | -25070.91 | -0.85 | -25030.15 | 1.24  | -24991.05 | 1.67  | -24951.50 | 2.55 | -24929.94 | 4.78 |
| -25150.86 | -3.46 | -25108.04 | 0.69  | -25071.57 | -1.51 | -25030.56 | 0.84  | -24989.80 | 2.92  | -24949.63 | 4.43 | -24927.79 | 6.93 |
| -25151.09 | -3.70 | -25110.13 | -1.40 | -25069.25 | 0.81  | -25025.60 | 5.79  | -24993.30 | -0.58 | -24949.99 | 4.07 | -24931.49 | 3.23 |
| -25150.53 | -3.13 | -25110.39 | -1.67 | -25071.81 | -1.75 | -25030.96 | 0.43  | -24987.49 | 5.24  | -24951.21 | 2.84 | -24929.52 | 5.21 |
| -25149.73 | -2.33 | -25110.37 | -1.65 | -25071.82 | -1.76 | -25029.66 | 1.73  | -24989.89 | 2.84  | -24949.61 | 4.45 | -24931.69 | 3.03 |
| -25151.21 | -3.81 | -25110.61 | -1.88 | -25068.71 | 1.35  | -25027.65 | 3.74  | -24991.23 | 1.49  | -24949.08 | 4.98 | -24932.95 | 1.78 |
| -25151.30 | -3.90 | -25109.95 | -1.22 | -25068.17 | 1.89  | -25027.09 | 4.30  | -24991.83 | 0.89  | -24949.75 | 4.30 | -24926.51 | 8.22 |
| -25150.94 | -3.54 | -25110.20 | -1.47 | -25068.75 | 1.31  | -25031.20 | 0.19  | -24988.40 | 4.32  | -24948.08 | 5.97 | -24928.65 | 6.07 |
| -25151.65 | -4.25 | -25109.09 | -0.36 | -25070.60 | -0.54 | -25032.26 | -0.86 | -24989.80 | 2.92  | -24945.53 | 8.53 | -24930.41 | 4.32 |
| -25151.13 | -3.73 | -25112.27 | -3.54 | -25070.91 | -0.85 | -25030.20 | 1.19  | -24991.44 | 1.28  | -24951.06 | 2.99 | -24928.87 | 5.85 |
| -25150.67 | -3.28 | -25112.22 | -3.49 | -25068.66 | 1.40  | -25028.33 | 3.07  | -24989.16 | 3.56  | -24949.85 | 4.21 | -24932.73 | 1.99 |
| -25152.68 | -5.28 | -25108.41 | 0.31  | -25070.09 | -0.03 | -25029.31 | 2.08  | -24991.62 | 1.11  | -24950.18 | 3.88 | -24931.21 | 3.51 |
| -25151.46 | -4.06 | -25109.63 | -0.91 | -25070.58 | -0.52 | -25033.04 | -1.65 | -24989.51 | 3.22  | -24949.66 | 4.40 | -24930.01 | 4.71 |
| -25152.07 | -4.68 | -25108.14 | 0.59  | -25070.95 | -0.89 | -25031.19 | 0.20  | -24988.21 | 4.51  | -24953.77 | 0.29 | -24927.95 | 6.78 |
| -25151.42 | -4.03 | -25109.90 | -1.18 | -25067.37 | 2.69  | -25030.80 | 0.59  | -24991.73 | 0.99  | -24950.62 | 3.43 | -24931.11 | 3.61 |
| -25151.21 | -3.81 | -25111.80 | -3.08 | -25066.09 | 3.97  | -25030.20 | 1.19  | -24991.82 | 0.91  | -24945.94 | 8.12 | -24932.63 | 2.10 |
| -25151.77 | -4.37 | -25109.29 | -0.56 | -25069.12 | 0.94  | -25031.35 | 0.04  | -24991.30 | 1.42  | -24949.81 | 4.24 | -24931.88 | 2.84 |
| -25149.76 | -2.36 | -25109.34 | -0.61 | -25070.08 | -0.02 | -25024.12 | 7.28  | -24990.49 | 2.23  | -24948.61 | 5.44 | -24930.58 | 4.14 |
| -25150.51 | -3.12 | -25110.93 | -2.21 | -25072.69 | -2.63 | -25030.73 | 0.66  | -24990.84 | 1.88  | -24945.82 | 8.24 | -24930.63 | 4.09 |
| -25150.71 | -3.32 | -25109.25 | -0.52 | -25070.41 | -0.36 | -25029.70 | 1.70  | -24991.25 | 1.48  | -24950.58 | 3.48 | -24925.04 | 9.68 |
| -25150.74 | -3.34 | -25110.68 | -1.95 | -25072.51 | -2.45 | -25029.24 | 2.15  | -24989.49 | 3.23  | -24950.01 | 4.04 | -24929.36 | 5.36 |
| -25149.81 | -2.41 | -25110.64 | -1.91 | -25072.00 | -1.94 | -25030.36 | 1.03  | -24991.55 | 1.18  | -24949.05 | 5.01 | -24930.48 | 4.24 |
| -25151.13 | -3.74 | -25110.24 | -1.52 | -25069.17 | 0.89  | -25031.22 | 0.17  | -24990.49 | 2.24  | -24950.07 | 3.98 | -24930.76 | 3.97 |
| -25150.68 | -3.28 | -25109.30 | -0.57 | -25071.91 | -1.85 | -25031.01 | 0.38  | -24992.62 | 0.11  | -24950.38 | 3.68 | -24929.03 | 5.69 |
| -25151.61 | -4.21 | -25111.25 | -2.53 | -25070.79 | -0.73 | -25025.52 | 5.87  | -24987.23 | 5.50  | -24949.86 | 4.19 | -24930.35 | 4.37 |
| -25150.33 | -2.94 | -25107.76 | 0.97  | -25069.80 | 0.26  | -25028.00 | 3.39  | -24993.44 | -0.72 | -24951.61 | 2.44 | -24928.94 | 5.78 |
| -25151.24 | -3.85 | -25111.29 | -2.57 | -25070.48 | -0.42 | -25029.59 | 1.80  | -24989.21 | 3.52  | -24952.90 | 1.16 | -24931.02 | 3.70 |
| -25150.76 | -3.36 | -25111.50 | -2.78 | -25072.06 | -2.00 | -25029.97 | 1.42  | -24991.44 | 1.29  | -24949.76 | 4.29 | -24929.77 | 4.95 |
| -25151.25 | -3.86 | -25110.99 | -2.27 | -25069.72 | 0.34  | -25031.34 | 0.05  | -24992.03 | 0.69  | -24951.07 | 2.99 | -24932.52 | 2.20 |

|           |       |           |       |           |       |           |       |           |       |           |      |           |      |
|-----------|-------|-----------|-------|-----------|-------|-----------|-------|-----------|-------|-----------|------|-----------|------|
| -25150.80 | -3.41 | -25109.30 | -0.58 | -25070.42 | -0.36 | -25029.69 | 1.70  | -24993.03 | -0.30 | -24949.32 | 4.74 | -24930.87 | 3.85 |
| -25150.67 | -3.27 | -25110.77 | -2.04 | -25069.73 | 0.33  | -25030.74 | 0.66  | -24991.93 | 0.79  | -24950.17 | 3.88 | -24931.08 | 3.64 |
| -25150.59 | -3.19 | -25111.33 | -2.60 | -25069.48 | 0.57  | -25030.83 | 0.56  | -24990.41 | 2.31  | -24946.65 | 7.40 | -24930.21 | 4.51 |
| -25151.59 | -4.20 | -25110.90 | -2.18 | -25070.45 | -0.39 | -25031.37 | 0.02  | -24988.73 | 3.99  | -24952.56 | 1.50 | -24927.03 | 7.69 |
| -25149.56 | -2.17 | -25110.68 | -1.96 | -25067.57 | 2.48  | -25028.88 | 2.51  | -24992.49 | 0.23  | -24951.71 | 2.35 | -24929.30 | 5.42 |
| -25149.30 | -1.90 | -25109.81 | -1.08 | -25070.98 | -0.92 | -25032.73 | -1.34 | -24989.27 | 3.45  | -24952.24 | 1.81 | -24929.59 | 5.13 |
| -25150.72 | -3.33 | -25110.76 | -2.03 | -25070.11 | -0.05 | -25025.80 | 5.59  | -24988.53 | 4.19  | -24949.48 | 4.58 | -24928.15 | 6.57 |
| -25149.99 | -2.60 | -25108.86 | -0.13 | -25068.29 | 1.77  | -25032.46 | -1.07 | -24991.11 | 1.62  | -24951.12 | 2.94 | -24930.76 | 3.96 |
| -25151.30 | -3.91 | -25111.51 | -2.79 | -25068.32 | 1.74  | -25030.33 | 1.06  | -24985.16 | 7.57  | -24950.42 | 3.63 | -24930.82 | 3.91 |
| -25150.08 | -2.69 | -25109.62 | -0.90 | -25070.36 | -0.30 | -25030.31 | 1.08  | -24989.25 | 3.47  | -24947.46 | 6.60 | -24927.77 | 6.95 |
| -25151.22 | -3.83 | -25110.62 | -1.90 | -25070.69 | -0.63 | -25027.06 | 4.33  | -24987.80 | 4.92  | -24948.20 | 5.86 | -24932.18 | 2.54 |
| -25151.44 | -4.04 | -25108.83 | -0.10 | -25072.09 | -2.03 | -25029.73 | 1.66  | -24992.42 | 0.30  | -24947.49 | 6.57 | -24934.27 | 0.45 |
| -25150.35 | -2.96 | -25111.65 | -2.92 | -25069.98 | 0.08  | -25033.46 | -2.06 | -24993.42 | -0.70 | -24948.08 | 5.98 | -24929.92 | 4.80 |
| -25150.80 | -3.41 | -25111.09 | -2.37 | -25069.39 | 0.67  | -25030.37 | 1.02  | -24988.42 | 4.31  | -24950.51 | 3.55 | -24933.07 | 1.65 |
| -25149.88 | -2.49 | -25109.17 | -0.44 | -25071.65 | -1.59 | -25033.42 | -2.03 | -24985.91 | 6.82  | -24952.70 | 1.36 | -24930.62 | 4.10 |
| -25150.88 | -3.49 | -25110.58 | -1.86 | -25071.58 | -1.53 | -25031.09 | 0.30  | -24986.86 | 5.87  | -24947.96 | 6.09 | -24928.63 | 6.10 |
| -25152.21 | -4.82 | -25110.48 | -1.76 | -25070.85 | -0.79 | -25031.21 | 0.18  | -24990.47 | 2.25  | -24951.03 | 3.03 | -24931.15 | 3.57 |
| -25150.58 | -3.18 | -25109.98 | -1.25 | -25071.15 | -1.09 | -25028.49 | 2.90  | -24991.89 | 0.83  | -24951.38 | 2.68 | -24926.40 | 8.32 |
| -25150.41 | -3.01 | -25109.53 | -0.81 | -25071.01 | -0.95 | -25032.19 | -0.80 | -24991.69 | 1.04  | -24953.39 | 0.67 | -24931.80 | 2.92 |
| -25151.62 | -4.23 | -25111.19 | -2.47 | -25069.46 | 0.60  | -25029.36 | 2.03  | -24990.48 | 2.24  | -24951.22 | 2.84 | -24929.66 | 5.06 |
| -25149.98 | -2.58 | -25110.06 | -1.33 | -25067.62 | 2.44  | -25032.41 | -1.02 | -24988.86 | 3.86  | -24951.20 | 2.86 | -24928.75 | 5.97 |
| -25150.20 | -2.80 | -25108.55 | 0.18  | -25070.31 | -0.25 | -25027.80 | 3.59  | -24987.50 | 5.22  | -24952.17 | 1.88 | -24933.29 | 1.43 |
| -25150.63 | -3.23 | -25109.15 | -0.43 | -25070.22 | -0.16 | -25030.49 | 0.90  | -24992.26 | 0.47  | -24951.73 | 2.32 | -24932.82 | 1.91 |
| -25150.73 | -3.34 | -25111.60 | -2.87 | -25071.25 | -1.19 | -25031.10 | 0.29  | -24990.96 | 1.77  | -24951.90 | 2.16 | -24931.98 | 2.74 |
| -25151.35 | -3.96 | -25111.69 | -2.97 | -25070.11 | -0.05 | -25027.86 | 3.53  | -24991.35 | 1.38  | -24947.55 | 6.50 | -24930.47 | 4.26 |
| -25151.52 | -4.13 | -25110.71 | -1.98 | -25071.76 | -1.70 | -25029.68 | 1.71  | -24991.00 | 1.72  | -24946.23 | 7.83 | -24930.61 | 4.11 |
| -25150.31 | -2.91 | -25110.03 | -1.30 | -25069.40 | 0.66  | -25030.93 | 0.46  | -24990.24 | 2.49  | -24951.64 | 2.41 | -24925.52 | 9.20 |
| -25150.61 | -3.22 | -25109.55 | -0.83 | -25069.51 | 0.55  | -25031.12 | 0.28  | -24991.80 | 0.92  | -24952.35 | 1.70 | -24931.44 | 3.28 |
| -25150.29 | -2.90 | -25110.36 | -1.64 | -25070.99 | -0.93 | -25025.36 | 6.03  | -24990.64 | 2.08  | -24952.32 | 1.74 | -24931.58 | 3.14 |
| -25150.92 | -3.52 | -25109.50 | -0.77 | -25071.46 | -1.40 | -25029.31 | 2.08  | -24991.96 | 0.76  | -24951.18 | 2.87 | -24932.80 | 1.92 |
| -25151.18 | -3.79 | -25079.92 | 28.81 | -25070.45 | -0.39 | -25025.16 | 6.23  | -24991.42 | 1.30  | -24952.34 | 1.71 | -24931.20 | 3.52 |
| -25150.56 | -3.16 | -25112.06 | -3.33 | -25070.65 | -0.59 | -25029.93 | 1.46  | -24986.72 | 6.00  | -24952.08 | 1.97 | -24929.68 | 5.05 |
| -25151.35 | -3.96 | -25111.50 | -2.78 | -25070.53 | -0.47 | -25032.15 | -0.76 | -24992.89 | -0.17 | -24948.88 | 5.18 | -24931.60 | 3.13 |
| -25148.84 | -1.44 | -25112.33 | -3.60 | -25072.54 | -2.48 | -25031.53 | -0.14 | -24991.16 | 1.57  | -24950.34 | 3.72 | -24934.47 | 0.25 |
| -25149.63 | -2.24 | -25110.38 | -1.65 | -25070.35 | -0.29 | -25032.08 | -0.69 | -24993.61 | -0.89 | -24953.19 | 0.86 | -24931.08 | 3.65 |
| -25150.32 | -2.93 | -25111.99 | -3.26 | -25068.30 | 1.76  | -25027.81 | 3.58  | -24993.02 | -0.30 | -24946.62 | 7.43 | -24929.74 | 4.98 |
| -25150.90 | -3.51 | -25111.57 | -2.84 | -25063.47 | 6.58  | -25030.17 | 1.22  | -24990.28 | 2.45  | -24953.17 | 0.89 | -24931.01 | 3.71 |
| -25150.04 | -2.64 | -25110.03 | -1.31 | -25071.94 | -1.88 | -25030.76 | 0.63  | -24990.44 | 2.28  | -24949.25 | 4.81 | -24930.06 | 4.66 |
| -25150.77 | -3.38 | -25109.88 | -1.16 | -25070.39 | -0.34 | -25031.06 | 0.33  | -24990.67 | 2.05  | -24950.51 | 3.54 | -24931.85 | 2.87 |
| -25150.72 | -3.32 | -25109.76 | -1.03 | -25071.33 | -1.27 | -25029.42 | 1.97  | -24990.44 | 2.28  | -24950.89 | 3.17 | -24931.19 | 3.53 |
| -25150.94 | -3.55 | -25110.39 | -1.66 | -25071.42 | -1.36 | -25031.55 | -0.16 | -24990.92 | 1.81  | -24948.64 | 5.41 | -24928.54 | 6.18 |

|           |       |           |       |           |       |           |       |           |       |           |      |           |      |
|-----------|-------|-----------|-------|-----------|-------|-----------|-------|-----------|-------|-----------|------|-----------|------|
| -25151.70 | -4.31 | -25108.50 | 0.23  | -25072.67 | -2.61 | -25032.19 | -0.80 | -24990.92 | 1.81  | -24952.01 | 2.05 | -24933.30 | 1.43 |
| -25150.74 | -3.34 | -25109.26 | -0.53 | -25072.24 | -2.18 | -25032.35 | -0.96 | -24989.94 | 2.78  | -24951.98 | 2.08 | -24929.37 | 5.35 |
| -25151.33 | -3.93 | -25110.60 | -1.88 | -25070.78 | -0.72 | -25031.63 | -0.24 | -24990.52 | 2.21  | -24950.09 | 3.97 | -24928.72 | 6.01 |
| -25150.96 | -3.56 | -25106.55 | 2.18  | -25067.96 | 2.10  | -25031.67 | -0.28 | -24988.39 | 4.34  | -24950.96 | 3.10 | -24931.70 | 3.02 |
| -25151.14 | -3.75 | -25109.29 | -0.56 | -25070.94 | -0.88 | -25027.66 | 3.73  | -24991.36 | 1.36  | -24949.18 | 4.88 | -24933.73 | 1.00 |
| -25150.68 | -3.29 | -25108.74 | -0.01 | -25073.28 | -3.22 | -25028.47 | 2.92  | -24988.61 | 4.11  | -24949.92 | 4.14 | -24930.25 | 4.47 |
| -25150.13 | -2.73 | -25112.15 | -3.42 | -25070.71 | -0.66 | -25031.65 | -0.26 | -24992.88 | -0.15 | -24951.19 | 2.87 | -24929.82 | 4.90 |
| -25151.17 | -3.78 | -25109.67 | -0.94 | -25071.62 | -1.56 | -25028.18 | 3.21  | -24992.26 | 0.47  | -24948.15 | 5.90 | -24931.39 | 3.33 |
| -25150.94 | -3.55 | -25110.44 | -1.71 | -25067.18 | 2.87  | -25029.84 | 1.55  | -24990.93 | 1.79  | -24947.09 | 6.97 | -24932.46 | 2.26 |
| -25149.68 | -2.29 | -25111.10 | -2.37 | -25065.87 | 4.19  |           |       |           |       |           |      | -24930.33 | 4.39 |
| -25150.47 | -3.08 | -25107.80 | 0.93  | -25069.22 | 0.83  |           |       |           |       |           |      |           |      |
| -25149.77 | -2.38 |           |       | -25071.29 | -1.23 |           |       |           |       |           |      |           |      |
| -25150.56 | -3.17 |           |       | -25071.18 | -1.12 |           |       |           |       |           |      |           |      |

Average energies

|           |       |           |       |           |       |           |      |           |      |           |      |           |      |
|-----------|-------|-----------|-------|-----------|-------|-----------|------|-----------|------|-----------|------|-----------|------|
| -25150.82 | -3.43 | -25110.01 | -1.28 | -25070.17 | -0.11 | -25029.98 | 1.41 | -24990.44 | 2.28 | -24950.06 | 4.00 | -24930.34 | 4.38 |
|-----------|-------|-----------|-------|-----------|-------|-----------|------|-----------|------|-----------|------|-----------|------|

ground state energy    solid solution energy

**Th**

concentration in solid solution (%)

number of atoms

|           | 3     | 6         | 9     | 12        | 15    | 18        | 21    |           |       |           |       |           |       |
|-----------|-------|-----------|-------|-----------|-------|-----------|-------|-----------|-------|-----------|-------|-----------|-------|
|           | 2     | 4         | 6     | 8         | 10    | 12        | 13    |           |       |           |       |           |       |
| -25156.46 | -3.44 | -25121.66 | -1.67 | -25085.00 | 1.95  | -25051.18 | 2.74  | -25015.40 | 5.48  | -24981.67 | 6.17  | -24962.28 | 9.04  |
| -25156.19 | -3.17 | -25122.22 | -2.23 | -25088.31 | -1.36 | -25050.99 | 2.92  | -25016.63 | 4.24  | -24982.87 | 4.97  | -24966.85 | 4.47  |
| -25155.36 | -2.34 | -25122.97 | -2.98 | -25089.21 | -2.26 | -25052.58 | 1.33  | -25020.55 | 0.33  | -24983.85 | 3.99  | -24963.72 | 7.60  |
| -25156.45 | -3.42 | -25121.60 | -1.61 | -25088.62 | -1.67 | -25046.82 | 7.10  | -25014.81 | 6.06  | -24984.85 | 2.99  | -24966.39 | 4.93  |
| -25157.52 | -4.49 | -25120.55 | -0.56 | -25086.19 | 0.76  | -25048.90 | 5.02  | -25013.64 | 7.24  | -24985.12 | 2.72  | -24962.82 | 8.50  |
| -25156.79 | -3.76 | -25121.15 | -1.17 | -25086.37 | 0.58  | -25053.63 | 0.29  | -25015.07 | 5.80  | -24977.30 | 10.54 | -24964.21 | 7.11  |
| -25156.31 | -3.29 | -25121.61 | -1.63 | -25086.03 | 0.92  | -25052.75 | 1.17  | -25018.97 | 1.91  | -24983.37 | 4.47  | -24969.17 | 2.15  |
| -25156.51 | -3.48 | -25122.02 | -2.03 | -25087.39 | -0.44 | -25055.87 | -1.95 | -25014.81 | 6.06  | -24986.39 | 1.45  | -24966.93 | 4.39  |
| -25156.32 | -3.30 | -25121.38 | -1.39 | -25085.85 | 1.10  | -25055.46 | -1.54 | -25018.14 | 2.73  | -24985.85 | 1.99  | -24966.05 | 5.27  |
| -25156.32 | -3.30 | -25119.20 | 0.79  | -25087.24 | -0.29 | -25046.21 | 7.71  | -25017.98 | 2.90  | -24983.66 | 4.18  | -24967.41 | 3.91  |
| -25156.45 | -3.42 | -25121.67 | -1.68 | -25088.11 | -1.16 | -25050.21 | 3.70  | -25019.41 | 1.46  | -24985.65 | 2.19  | -24963.36 | 7.96  |
| -25155.89 | -2.87 | -25124.17 | -4.18 | -25088.50 | -1.55 | -25052.97 | 0.94  | -25021.28 | -0.41 | -24981.79 | 6.05  | -24965.20 | 6.12  |
| -25156.24 | -3.21 | -25123.51 | -3.52 | -25088.56 | -1.60 | -25050.34 | 3.57  | -25015.49 | 5.38  | -24981.37 | 6.47  | -24960.81 | 10.51 |
| -25157.40 | -4.38 | -25122.67 | -2.68 | -25087.82 | -0.87 | -25049.45 | 4.46  | -25020.29 | 0.59  | -24980.57 | 7.27  | -24958.31 | 13.01 |
| -25155.90 | -2.88 | -25121.77 | -1.78 | -25089.40 | -2.45 | -25054.29 | -0.38 | -25019.07 | 1.81  | -24985.24 | 2.60  | -24971.71 | -0.39 |
| -25156.46 | -3.44 | -25122.78 | -2.79 | -25087.96 | -1.01 | -25053.85 | 0.06  | -25018.42 | 2.46  | -24984.94 | 2.89  | -24966.00 | 5.32  |
| -25155.31 | -2.29 | -25121.44 | -1.45 | -25085.16 | 1.79  | -25052.30 | 1.61  | -25016.67 | 4.20  | -24983.49 | 4.35  | -24968.84 | 2.48  |
| -25157.38 | -4.35 | -25120.52 | -0.53 | -25087.43 | -0.48 | -25047.83 | 6.08  | -25014.97 | 5.91  | -24984.56 | 3.28  | -24966.82 | 4.50  |
| -25156.73 | -3.70 | -25120.78 | -0.79 | -25087.16 | -0.20 | -25049.33 | 4.59  | -25012.34 | 8.53  | -24984.19 | 3.65  | -24964.33 | 6.99  |

|           |       |           |       |           |       |           |       |           |       |           |       |           |       |
|-----------|-------|-----------|-------|-----------|-------|-----------|-------|-----------|-------|-----------|-------|-----------|-------|
| -25156.79 | -3.77 | -25118.17 | 1.81  | -25087.81 | -0.86 | -25052.51 | 1.41  | -25014.19 | 6.69  | -24986.25 | 1.59  | -24965.29 | 6.03  |
| -25154.71 | -1.68 | -25121.97 | -1.98 | -25089.53 | -2.58 | -25054.03 | -0.12 | -25017.99 | 2.89  | -24980.20 | 7.64  | -24967.25 | 4.07  |
| -25156.28 | -3.26 | -25123.16 | -3.18 | -25086.11 | 0.84  | -25050.76 | 3.16  | -25016.96 | 3.91  | -24977.17 | 10.67 | -24964.54 | 6.78  |
| -25155.57 | -2.55 | -25122.42 | -2.44 | -25088.38 | -1.43 | -25052.72 | 1.20  | -25018.49 | 2.39  | -24984.98 | 2.86  | -24967.76 | 3.56  |
| -25156.53 | -3.50 | -25119.02 | 0.97  | -25085.23 | 1.72  | -25043.56 | 10.35 | -25015.04 | 5.83  | -24984.09 | 3.75  | -24965.81 | 5.51  |
| -25156.09 | -3.07 | -25121.16 | -1.17 | -25083.02 | 3.93  | -25052.72 | 1.20  | -25016.06 | 4.82  | -24984.19 | 3.65  | -24963.69 | 7.63  |
| -25155.59 | -2.57 | -25120.64 | -0.65 | -25087.72 | -0.77 | -25050.45 | 3.46  | -25020.54 | 0.33  | -24987.13 | 0.70  | -24966.49 | 4.83  |
| -25156.74 | -3.71 | -25122.43 | -2.44 | -25087.33 | -0.38 | -25049.63 | 4.29  | -25021.49 | -0.61 | -24984.77 | 3.07  | -24965.11 | 6.21  |
| -25156.89 | -3.87 | -25123.52 | -3.53 | -25085.74 | 1.21  | -25051.08 | 2.83  | -25019.05 | 1.82  | -24986.30 | 1.54  | -24952.22 | 19.10 |
| -25156.31 | -3.28 | -25118.21 | 1.78  | -25087.36 | -0.41 | -25052.34 | 1.58  | -25018.20 | 2.67  | -24983.92 | 3.92  | -24958.49 | 12.83 |
| -25156.71 | -3.68 | -25119.60 | 0.39  | -25087.93 | -0.98 | -25051.28 | 2.63  | -25015.53 | 5.35  | -24986.84 | 1.00  | -24966.29 | 5.03  |
| -25156.22 | -3.20 | -25121.50 | -1.52 | -25086.02 | 0.93  | -25053.18 | 0.74  | -25018.79 | 2.09  | -24984.79 | 3.05  | -24969.24 | 2.07  |
| -25156.77 | -3.75 | -25120.41 | -0.43 | -25084.05 | 2.91  | -25053.60 | 0.31  | -25012.87 | 8.00  | -24981.54 | 6.29  | -24966.73 | 4.59  |
| -25155.68 | -2.66 | -25121.44 | -1.45 | -25085.88 | 1.07  | -25053.02 | 0.90  | -25013.91 | 6.97  | -24983.85 | 3.99  | -24966.79 | 4.53  |
| -25157.43 | -4.41 | -25120.38 | -0.39 | -25087.53 | -0.58 | -25052.78 | 1.14  | -25019.24 | 1.63  | -24983.06 | 4.78  | -24953.44 | 17.88 |
| -25156.59 | -3.57 | -25122.47 | -2.48 | -25086.83 | 0.12  | -25046.30 | 7.61  | -25016.15 | 4.73  | -24979.67 | 8.17  | -24966.64 | 4.68  |
| -25157.41 | -4.38 | -25120.74 | -0.76 | -25085.03 | 1.92  | -25052.06 | 1.85  | -25019.04 | 1.83  | -24983.35 | 4.49  | -24968.09 | 3.23  |
| -25155.85 | -2.82 | -25119.87 | 0.11  | -25087.82 | -0.87 | -25052.62 | 1.29  | -25014.47 | 6.41  | -24985.28 | 2.56  | -24964.43 | 6.89  |
| -25157.43 | -4.41 | -25121.12 | -1.14 | -25088.59 | -1.64 | -25050.83 | 3.09  | -25014.22 | 6.66  | -24983.55 | 4.29  | -24960.99 | 10.33 |
| -25156.05 | -3.03 | -25122.08 | -2.09 | -25087.06 | -0.11 | -25056.00 | -2.09 | -25016.20 | 4.68  | -24978.16 | 9.68  | -24960.06 | 11.26 |
| -25156.73 | -3.71 | -25121.50 | -1.51 | -25087.49 | -0.54 | -25053.17 | 0.74  | -25014.44 | 6.43  | -24984.62 | 3.22  | -24966.53 | 4.79  |
| -25156.39 | -3.37 | -25122.64 | -2.65 | -25087.36 | -0.41 | -25051.13 | 2.78  | -25014.84 | 6.04  | -24982.85 | 4.99  | -24961.63 | 9.69  |
| -25156.58 | -3.55 | -25121.26 | -1.27 | -25085.95 | 1.00  | -25054.61 | -0.69 | -25018.96 | 1.91  | -24983.77 | 4.07  | -24963.07 | 8.25  |
| -25156.80 | -3.78 | -25123.04 | -3.05 | -25084.37 | 2.58  | -25052.24 | 1.67  | -25021.35 | -0.48 | -24982.58 | 5.26  | -24966.39 | 4.93  |
| -25158.01 | -4.99 | -25122.09 | -2.10 | -25086.23 | 0.72  | -25048.23 | 5.68  | -25018.85 | 2.03  | -24984.09 | 3.75  | -24965.55 | 5.77  |
| -25156.75 | -3.73 | -25120.84 | -0.85 | -25088.61 | -1.66 | -25051.35 | 2.56  | -25018.44 | 2.43  | -24978.15 | 9.69  | -24965.61 | 5.71  |
| -25156.18 | -3.15 | -25122.22 | -2.23 | -25083.73 | 3.22  | -25054.18 | -0.27 | -25018.47 | 2.41  | -24983.10 | 4.74  | -24960.96 | 10.36 |
| -25156.51 | -3.48 | -25120.19 | -0.20 | -25088.14 | -1.19 | -25053.28 | 0.63  | -25018.10 | 2.78  | -24983.17 | 4.67  | -24964.18 | 7.14  |
| -25157.24 | -4.21 | -25120.94 | -0.95 | -25083.91 | 3.04  | -25049.97 | 3.94  | -25021.65 | -0.77 | -24975.27 | 12.57 | -24970.02 | 1.30  |
| -25154.77 | -1.74 | -25121.81 | -1.82 | -25085.87 | 1.08  | -25051.65 | 2.26  | -25011.92 | 8.96  | -24977.31 | 10.53 | -24962.81 | 8.51  |
| -25155.29 | -2.26 | -25121.95 | -1.96 | -25087.92 | -0.97 | -25051.44 | 2.47  | -25013.49 | 7.39  | -24976.43 | 11.41 | -24964.73 | 6.59  |
| -25156.26 | -3.24 | -25121.49 | -1.50 | -25087.57 | -0.61 | -25049.35 | 4.57  | -25014.91 | 5.96  | -24976.87 | 10.97 | -24965.57 | 5.75  |
| -25156.44 | -3.42 | -25123.09 | -3.11 | -25086.72 | 0.23  | -25051.94 | 1.97  | -25015.08 | 5.80  | -24983.60 | 4.24  | -24966.22 | 5.10  |
| -25157.23 | -4.20 | -25119.24 | 0.75  | -25088.77 | -1.82 | -25052.02 | 1.89  | -25015.45 | 5.42  | -24975.22 | 12.61 | -24966.41 | 4.91  |
| -25157.56 | -4.53 | -25120.49 | -0.50 | -25088.72 | -1.77 | -25050.49 | 3.43  | -25018.62 | 2.26  | -24980.67 | 7.16  | -24967.99 | 3.33  |
| -25156.18 | -3.16 | -25121.36 | -1.37 | -25083.29 | 3.66  | -25051.59 | 2.33  | -25018.21 | 2.67  | -24979.31 | 8.52  | -24966.98 | 4.34  |
| -25155.66 | -2.63 | -25121.85 | -1.86 | -25088.31 | -1.36 | -25050.50 | 3.41  | -25018.59 | 2.28  | -24985.62 | 2.22  | -24969.08 | 2.24  |
| -25155.90 | -2.88 | -25121.59 | -1.61 | -25088.41 | -1.46 | -25051.04 | 2.88  | -25016.52 | 4.36  | -24978.86 | 8.98  | -24964.76 | 6.56  |
| -25155.60 | -2.57 | -25121.63 | -1.64 | -25087.74 | -0.79 | -25050.14 | 3.77  | -25016.74 | 4.14  | -24982.16 | 5.67  | -24964.51 | 6.81  |
| -25156.92 | -3.90 | -25122.41 | -2.42 | -25087.52 | -0.57 | -25052.59 | 1.33  | -25020.27 | 0.60  | -24984.24 | 3.60  | -24966.01 | 5.31  |
| -25156.82 | -3.79 | -25122.04 | -2.05 | -25083.01 | 3.94  | -25050.32 | 3.59  | -25021.09 | -0.21 | -24981.73 | 6.11  | -24965.62 | 5.70  |

|           |       |           |       |           |       |           |       |           |       |           |       |           |       |
|-----------|-------|-----------|-------|-----------|-------|-----------|-------|-----------|-------|-----------|-------|-----------|-------|
| -25157.41 | -4.39 | -25122.64 | -2.66 | -25087.28 | -0.33 | -25052.43 | 1.48  | -25012.72 | 8.15  | -24980.17 | 7.67  | -24968.50 | 2.82  |
| -25157.59 | -4.57 | -25121.60 | -1.61 | -25087.56 | -0.61 | -25052.22 | 1.70  | -25017.88 | 2.99  | -24983.53 | 4.30  | -24967.87 | 3.45  |
| -25155.43 | -2.41 | -25120.11 | -0.12 | -25086.04 | 0.91  | -25048.45 | 5.46  | -25002.84 | 18.04 | -24986.42 | 1.42  | -24968.14 | 3.18  |
| -25155.82 | -2.80 | -25122.19 | -2.20 | -25084.48 | 2.47  | -25051.60 | 2.32  | -25018.05 | 2.82  | -24983.88 | 3.96  | -24962.72 | 8.60  |
| -25157.32 | -4.29 | -25121.98 | -1.99 | -25087.93 | -0.98 | -25051.27 | 2.64  | -25013.86 | 7.01  | -24982.50 | 5.34  | -24964.97 | 6.35  |
| -25156.44 | -3.41 | -25120.59 | -0.61 | -25086.08 | 0.87  | -25052.65 | 1.26  | -25017.82 | 3.05  | -24976.10 | 11.74 | -24965.27 | 6.05  |
| -25156.05 | -3.02 | -25121.51 | -1.52 | -25081.96 | 4.99  | -25052.65 | 1.27  | -25012.53 | 8.35  | -24983.50 | 4.33  | -24968.07 | 3.25  |
| -25156.67 | -3.65 | -25122.89 | -2.90 | -25088.81 | -1.86 | -25050.93 | 2.98  | -25009.96 | 10.92 | -24985.28 | 2.56  | -24961.71 | 9.61  |
| -25157.81 | -4.78 | -25122.34 | -2.35 | -25083.77 | 3.18  | -25052.24 | 1.67  | -25016.22 | 4.66  | -24981.61 | 6.23  | -24968.41 | 2.91  |
| -25156.60 | -3.58 | -25121.47 | -1.49 | -25087.92 | -0.97 | -25051.18 | 2.73  | -25016.71 | 4.16  | -24987.00 | 0.84  | -24963.75 | 7.57  |
| -25157.17 | -4.15 | -25119.78 | 0.21  | -25087.53 | -0.58 | -25051.74 | 2.18  | -25021.62 | -0.75 | -24985.17 | 2.67  | -24968.47 | 2.85  |
| -25155.48 | -2.46 | -25120.40 | -0.41 | -25088.14 | -1.19 | -25051.99 | 1.92  | -25018.05 | 2.82  | -24986.57 | 1.27  | -24967.07 | 4.25  |
| -25156.90 | -3.88 | -25123.57 | -3.59 | -25085.02 | 1.93  | -25050.38 | 3.53  | -25017.61 | 3.27  | -24984.80 | 3.04  | -24963.53 | 7.79  |
| -25155.30 | -2.28 | -25122.48 | -2.49 | -25087.50 | -0.55 | -25051.25 | 2.66  | -25019.32 | 1.55  | -24982.89 | 4.95  | -24965.88 | 5.44  |
| -25155.75 | -2.73 | -25122.12 | -2.13 | -25086.18 | 0.77  | -25052.98 | 0.93  | -25016.11 | 4.76  | -24981.90 | 5.94  | -24965.68 | 5.64  |
| -25156.86 | -3.84 | -25121.41 | -1.42 | -25084.96 | 1.99  | -25052.57 | 1.34  | -25014.50 | 6.37  | -24985.82 | 2.01  | -24969.90 | 1.42  |
| -25155.74 | -2.72 | -25121.77 | -1.78 | -25087.64 | -0.69 | -25050.76 | 3.16  | -25018.95 | 1.92  | -24985.57 | 2.27  | -24965.03 | 6.29  |
| -25157.54 | -4.52 | -25121.06 | -1.08 | -25085.53 | 1.42  | -25050.26 | 3.65  | -25021.79 | -0.91 | -24978.27 | 9.57  | -24965.40 | 5.92  |
| -25156.49 | -3.46 | -25122.54 | -2.56 | -25086.29 | 0.66  | -25050.55 | 3.36  | -25019.05 | 1.82  | -24985.95 | 1.89  | -24965.17 | 6.15  |
| -25155.28 | -2.26 | -25123.71 | -3.72 | -25085.39 | 1.56  | -25051.71 | 2.20  | -25017.94 | 2.94  | -24982.81 | 5.03  | -24959.07 | 12.25 |
| -25156.44 | -3.42 | -25121.19 | -1.20 | -25087.28 | -0.33 | -25051.66 | 2.25  | -25021.57 | -0.70 | -24983.23 | 4.61  | -24965.33 | 5.99  |
| -25156.80 | -3.77 | -25121.31 | -1.32 | -25084.94 | 2.01  | -25052.80 | 1.12  | -25016.33 | 4.55  | -24980.34 | 7.50  | -24964.18 | 7.14  |
| -25155.45 | -2.42 | -25122.19 | -2.20 | -25087.34 | -0.39 | -25051.85 | 2.07  | -25019.00 | 1.87  | -24986.34 | 1.50  | -24963.98 | 7.34  |
| -25155.98 | -2.95 | -25123.38 | -3.39 | -25089.65 | -2.70 | -25051.23 | 2.68  | -25020.18 | 0.69  | -24981.94 | 5.90  | -24967.08 | 4.24  |
| -25155.94 | -2.91 | -25121.94 | -1.96 | -25088.12 | -1.17 | -25046.93 | 6.98  | -25018.40 | 2.48  | -24984.57 | 3.27  | -24965.99 | 5.33  |
| -25157.80 | -4.78 | -25122.20 | -2.21 | -25087.36 | -0.41 | -25052.03 | 1.88  | -25018.74 | 2.13  | -24985.36 | 2.48  | -24964.22 | 7.10  |
| -25157.37 | -4.35 | -25121.85 | -1.86 | -25089.21 | -2.26 | -25050.79 | 3.12  | -25012.98 | 7.89  | -24983.04 | 4.80  | -24966.49 | 4.83  |
| -25156.66 | -3.64 | -25120.09 | -0.10 | -25086.18 | 0.77  | -25046.89 | 7.02  | -25015.38 | 5.50  | -24985.12 | 2.72  | -24966.15 | 5.17  |
| -25156.96 | -3.94 | -25119.99 | 0.00  | -25084.26 | 2.69  | -25052.31 | 1.61  | -25016.89 | 3.99  | -24982.13 | 5.71  | -24968.81 | 2.51  |
| -25156.67 | -3.65 | -25122.76 | -2.77 | -25086.82 | 0.13  | -25052.81 | 1.10  | -25017.04 | 3.83  | -24982.54 | 5.30  | -24963.03 | 8.29  |
| -25156.28 | -3.26 | -25121.83 | -1.85 | -25085.40 | 1.55  | -25056.15 | -2.24 | -25012.36 | 8.52  | -24976.54 | 11.30 | -24963.20 | 8.12  |
| -25155.92 | -2.90 | -25122.04 | -2.05 | -25087.37 | -0.42 | -25050.52 | 3.40  | -25016.60 | 4.28  | -24984.06 | 3.78  | -24967.40 | 3.92  |
| -25156.47 | -3.44 | -25123.13 | -3.14 | -25086.61 | 0.34  | -25051.35 | 2.57  | -25013.24 | 7.63  | -24973.95 | 13.89 | -24966.10 | 5.22  |
| -25154.68 | -1.66 | -25121.22 | -1.24 | -25085.60 | 1.35  | -25053.31 | 0.60  | -25018.87 | 2.00  | -24982.52 | 5.32  | -24962.28 | 9.04  |
| -25156.39 | -3.37 | -25122.35 | -2.36 | -25086.89 | 0.06  | -25048.24 | 5.67  | -25021.26 | -0.38 | -24984.88 | 2.96  | -24966.53 | 4.79  |
| -25155.11 | -2.09 | -25122.01 | -2.02 | -25085.60 | 1.35  | -25053.79 | 0.12  | -25017.76 | 3.11  | -24983.34 | 4.49  | -24964.80 | 6.52  |
| -25157.31 | -4.29 | -25122.02 | -2.04 | -25084.47 | 2.48  | -25052.40 | 1.52  | -25016.64 | 4.24  | -24978.82 | 9.02  | -24965.66 | 5.66  |
| -25155.88 | -2.85 | -25122.39 | -2.40 | -25086.33 | 0.62  | -25054.47 | -0.56 | -25019.11 | 1.76  | -24981.33 | 6.50  | -24966.99 | 4.33  |
| -25155.65 | -2.63 | -25121.21 | -1.23 | -25084.80 | 2.15  | -25056.25 | -2.33 | -25014.72 | 6.16  | -24981.63 | 6.20  | -24963.35 | 7.97  |
| -25157.04 | -4.02 | -25122.92 | -2.93 | -25088.73 | -1.78 | -25049.90 | 4.01  | -25020.25 | 0.63  | -24986.87 | 0.97  | -24971.93 | -0.61 |
| -25155.87 | -2.85 | -25122.35 | -2.36 | -25088.64 | -1.69 | -25050.31 | 3.60  | -25014.83 | 6.05  | -24981.62 | 6.22  | -24967.18 | 4.14  |

|                  |           |           |           |           |           |           |           |           |           |           |           |           |           |      |
|------------------|-----------|-----------|-----------|-----------|-----------|-----------|-----------|-----------|-----------|-----------|-----------|-----------|-----------|------|
| -25157.09        | -4.07     | -25120.81 | -0.82     | -25088.34 | -1.39     | -25051.08 | 2.83      | -25013.23 | 7.64      | -24979.43 | 8.41      | -24965.41 | 5.91      |      |
| -25155.68        | -2.65     | -25120.43 | -0.44     | -25083.28 | 3.67      | -25053.89 | 0.02      | -25016.77 | 4.10      | -24983.84 | 3.99      | -24964.73 | 6.59      |      |
| -25156.26        | -3.24     | -25119.79 | 0.20      | -25089.51 | -2.56     | -25054.02 | -0.11     | -25013.86 | 7.02      | -24977.75 | 10.08     | -24962.25 | 9.07      |      |
| -25156.86        | -3.83     | -25121.63 | -1.65     | -25084.65 | 2.30      | -25051.42 | 2.49      | -25016.13 | 4.74      | -24980.38 | 7.46      | -24959.26 | 12.06     |      |
| -25156.36        | -3.34     | -25124.14 | -4.16     | -25086.05 | 0.90      | -25048.07 | 5.85      | -25014.39 | 6.49      | -24983.89 | 3.95      | -24968.35 | 2.97      |      |
| -25156.70        | -3.68     | -25121.31 | -1.32     | -25086.80 | 0.15      | -25054.46 | -0.55     | -25019.41 | 1.47      | -24985.38 | 2.46      | -24971.71 | -0.39     |      |
| -25157.49        | -4.47     | -25122.17 | -2.18     | -25086.51 | 0.44      | -25049.52 | 4.40      | -25015.32 | 5.56      | -24984.66 | 3.18      | -24969.52 | 1.80      |      |
| -25156.68        | -3.66     | -25122.93 | -2.94     | -25088.21 | -1.26     | -25053.59 | 0.33      | -25019.12 | 1.76      | -24985.37 | 2.47      | -24965.05 | 6.27      |      |
| -25155.11        | -2.08     | -25122.74 | -2.76     | -25087.09 | -0.14     | -25049.94 | 3.97      | -25018.52 | 2.36      | -24982.49 | 5.35      | -24963.10 | 8.22      |      |
| -25156.39        | -3.36     | -25120.54 | -0.55     | -25086.70 | 0.25      | -25053.36 | 0.55      | -25021.18 | -0.30     | -24982.90 | 4.94      | -24964.67 | 6.65      |      |
| -25156.47        | -3.45     | -25123.48 | -3.50     | -25084.32 | 2.63      | -25052.93 | 0.98      | -25020.16 | 0.72      | -24985.26 | 2.58      | -24958.40 | 12.92     |      |
| -25156.80        | -3.77     | -25118.08 | 1.90      | -25088.50 | -1.55     | -25054.93 | -1.02     | -25020.14 | 0.74      | -24985.15 | 2.69      | -24963.52 | 7.80      |      |
| -25154.89        | -1.86     | -25123.09 | -3.10     | -25087.93 | -0.98     | -25051.05 | 2.87      | -25016.23 | 4.65      | -24985.74 | 2.10      | -24966.30 | 5.02      |      |
| -25156.20        | -3.18     | -25120.14 | -0.15     | -25086.61 | 0.34      | -25050.44 | 3.47      | -25018.85 | 2.02      |           |           |           |           |      |
| -25156.73        | -3.71     |           |           | -25086.56 | 0.39      | -25052.04 | 1.87      | -25015.38 | 5.49      |           |           |           |           |      |
| -25157.12        | -4.10     |           |           |           |           | -25053.37 | 0.54      | -25020.17 | 0.71      |           |           |           |           |      |
| -25156.12        | -3.10     |           |           |           |           |           |           | -25016.26 | 4.61      |           |           |           |           |      |
| Average energies | -25156.41 | -3.39     | -25121.61 | -1.63     | -25086.75 | 0.20      | -25051.60 | 2.31      | -25017.03 | 3.85      | -24982.79 | 5.05      | -24965.20 | 6.12 |

## U

concentration in solid solution (%)  
number of atoms

|           | ground<br>state<br>energy | solid<br>solution<br>energy |       |           |       |           |       |           |       |           |      |           |       |
|-----------|---------------------------|-----------------------------|-------|-----------|-------|-----------|-------|-----------|-------|-----------|------|-----------|-------|
|           | 3                         | 6                           |       | 9         |       | 12        |       | 15        |       | 18        |      | 21        |       |
|           | 2                         | 4                           |       | 6         |       | 8         |       | 10        |       | 12        |      | 13        |       |
| -25160.74 | -2.70                     | -25130.52                   | -0.50 | -25093.99 | 8.02  | -25074.93 | -0.94 | -25043.22 | 2.75  | -25009.59 | 8.36 | -24997.87 | 6.07  |
| -25160.50 | -2.46                     | -25132.28                   | -2.26 | -25099.87 | 2.14  | -25069.86 | 4.13  | -25043.14 | 2.83  | -25017.44 | 0.51 | -25000.44 | 3.50  |
| -25161.52 | -3.48                     | -25129.32                   | 0.71  | -25100.91 | 1.09  | -25071.52 | 2.47  | -25044.68 | 1.29  | -25015.61 | 2.34 | -24995.01 | 8.93  |
| -25160.95 | -2.90                     | -25127.57                   | 2.45  | -25096.30 | 5.71  | -25073.98 | 0.01  | -25042.93 | 3.04  | -25015.13 | 2.82 | -24993.52 | 10.42 |
| -25161.16 | -3.12                     | -25131.37                   | -1.35 | -25101.28 | 0.73  | -25068.50 | 5.49  | -25042.75 | 3.22  | -25013.01 | 4.94 | -24996.93 | 7.01  |
| -25159.60 | -1.56                     | -25130.56                   | -0.54 | -25103.88 | -1.87 | -25073.80 | 0.19  | -25046.17 | -0.20 | -25010.65 | 7.30 | -24996.68 | 7.27  |
| -25159.28 | -1.23                     | -25130.56                   | -0.53 | -25101.16 | 0.85  | -25070.29 | 3.70  | -25045.13 | 0.84  | -25014.70 | 3.25 | -25000.93 | 3.01  |
| -25160.59 | -2.54                     | -25131.28                   | -1.26 | -25103.25 | -1.24 | -25071.71 | 2.28  | -25037.38 | 8.59  | -25017.35 | 0.60 | -25001.90 | 2.04  |
| -25160.61 | -2.57                     | -25131.29                   | -1.27 | -25099.72 | 2.28  | -25073.51 | 0.48  | -25044.02 | 1.95  | -25008.49 | 9.46 | -24998.62 | 5.32  |
| -25160.82 | -2.77                     | -25131.84                   | -1.82 | -25103.61 | -1.60 | -25073.20 | 0.79  | -25035.71 | 10.26 | -25014.50 | 3.45 | -25002.47 | 1.47  |
| -25160.53 | -2.48                     | -25129.39                   | 0.64  | -25102.84 | -0.83 | -25071.53 | 2.46  | -25041.21 | 4.76  | -25010.46 | 7.49 | -24998.28 | 5.66  |
| -25162.13 | -4.08                     | -25131.21                   | -1.19 | -25101.17 | 0.84  | -25077.01 | -3.02 | -25042.03 | 3.94  | -25009.16 | 8.79 | -24996.98 | 6.97  |
| -25160.38 | -2.34                     | -25130.84                   | -0.82 | -25098.16 | 3.85  | -25072.15 | 1.84  | -25043.01 | 2.96  | -25015.79 | 2.16 | -24996.60 | 7.34  |
| -25159.79 | -1.75                     | -25129.44                   | 0.59  | -25102.29 | -0.28 | -25074.51 | -0.52 | -25044.87 | 1.10  | -25011.40 | 6.55 | -25000.35 | 3.59  |



|           |       |           |       |           |       |           |       |           |       |           |       |           |       |
|-----------|-------|-----------|-------|-----------|-------|-----------|-------|-----------|-------|-----------|-------|-----------|-------|
| -25160.78 | -2.73 | -25131.43 | -1.41 | -25100.32 | 1.69  | -25072.03 | 1.96  | -25044.01 | 1.96  | -25011.26 | 6.69  | -24992.64 | 11.30 |
| -25161.51 | -3.46 | -25130.82 | -0.79 | -25101.21 | 0.79  | -25073.26 | 0.73  | -25039.94 | 6.03  | -25015.22 | 2.73  | -24999.62 | 4.32  |
| -25159.64 | -1.59 | -25130.87 | -0.84 | -25102.01 | -0.01 | -25071.23 | 2.76  | -25036.77 | 9.20  | -25014.46 | 3.49  | -25000.59 | 3.35  |
| -25160.07 | -2.02 | -25129.78 | 0.25  | -25100.97 | 1.04  | -25064.37 | 9.62  | -25043.55 | 2.42  | -25008.28 | 9.67  | -25001.02 | 2.92  |
| -25161.40 | -3.36 | -25131.76 | -1.74 | -25102.38 | -0.37 | -25070.77 | 3.22  | -25042.95 | 3.02  | -25015.49 | 2.47  | -25002.72 | 1.22  |
| -25160.86 | -2.82 | -25132.43 | -2.41 | -25103.09 | -1.09 | -25072.71 | 1.28  | -25044.91 | 1.06  | -25013.82 | 4.13  | -25004.90 | -0.96 |
| -25160.57 | -2.53 | -25131.94 | -1.91 | -25102.17 | -0.16 | -25071.56 | 2.42  | -25043.04 | 2.93  | -25012.21 | 5.74  | -25000.00 | 3.94  |
| -25160.04 | -1.99 | -25131.39 | -1.36 | -25103.31 | -1.30 | -25073.76 | 0.22  | -25044.29 | 1.68  | -25015.54 | 2.41  | -24995.79 | 8.15  |
| -25160.77 | -2.73 | -25133.15 | -3.12 | -25101.07 | 0.94  | -25071.85 | 2.14  | -25041.00 | 4.97  | -25013.20 | 4.75  | -25003.84 | 0.10  |
| -25154.53 | 3.51  | -25132.08 | -2.05 | -25101.29 | 0.71  | -25072.13 | 1.85  | -25043.22 | 2.75  | -25013.32 | 4.63  | -25000.99 | 2.96  |
| -25160.23 | -2.19 | -25129.05 | 0.98  | -25101.48 | 0.53  | -25072.39 | 1.60  | -25045.14 | 0.83  | -25013.31 | 4.64  | -25001.57 | 2.37  |
| -25160.24 | -2.20 | -25132.52 | -2.50 | -25103.38 | -1.37 | -25072.66 | 1.32  | -25047.02 | -1.05 | -25006.10 | 11.85 | -24998.49 | 5.45  |
| -25159.92 | -1.88 | -25131.32 | -1.29 | -25099.88 | 2.13  | -25075.52 | -1.53 | -25038.30 | 7.67  | -25013.37 | 4.58  | -25000.52 | 3.42  |
| -25160.18 | -2.14 | -25130.52 | -0.50 | -25101.39 | 0.62  | -25074.20 | -0.21 | -25043.20 | 2.77  | -25015.54 | 2.41  | -25003.72 | 0.22  |
| -25160.77 | -2.73 | -25129.25 | 0.78  | -25102.22 | -0.21 | -25070.24 | 3.75  | -25042.48 | 3.49  | -25015.21 | 2.74  | -25002.65 | 1.29  |
| -25155.38 | 2.67  | -25131.75 | -1.73 | -25100.27 | 1.74  | -25071.19 | 2.79  | -25042.60 | 3.37  | -25014.35 | 3.60  | -25002.13 | 1.82  |
| -25160.15 | -2.11 | -25130.36 | -0.34 | -25099.39 | 2.62  | -25073.25 | 0.74  | -25043.56 | 2.41  | -25014.16 | 3.79  | -24996.17 | 7.78  |
| -25160.03 | -1.99 | -25131.32 | -1.30 | -25101.97 | 0.03  | -25068.91 | 5.08  | -25042.38 | 3.59  | -25012.72 | 5.23  | -25002.25 | 1.69  |
| -25159.53 | -1.49 | -25131.11 | -1.08 | -25105.17 | -3.17 | -25073.27 | 0.72  | -25046.15 | -0.18 | -25014.34 | 3.61  | -25000.08 | 3.86  |
| -25160.95 | -2.91 | -25131.94 | -1.92 | -25098.08 | 3.93  | -25071.32 | 2.66  | -25044.89 | 1.08  | -25016.16 | 1.79  | -24996.78 | 7.16  |
| -25161.45 | -3.41 | -25130.80 | -0.77 | -25099.24 | 2.77  | -25074.88 | -0.89 | -25046.81 | -0.84 | -25012.13 | 5.82  | -24995.17 | 8.77  |
| -25159.41 | -1.36 | -25129.89 | 0.13  | -25100.57 | 1.44  | -25070.21 | 3.78  | -25042.34 | 3.63  | -25016.63 | 1.32  | -24998.66 | 5.28  |
| -25160.66 | -2.62 | -25131.22 | -1.20 | -25097.48 | 4.53  | -25074.04 | -0.05 | -25043.19 | 2.78  | -25015.53 | 2.42  | -25000.04 | 3.90  |
| -25160.06 | -2.02 | -25130.45 | -0.43 | -25102.25 | -0.24 | -25074.20 | -0.21 | -25044.45 | 1.52  | -25013.94 | 4.01  | -25000.18 | 3.76  |
| -25161.51 | -3.47 | -25130.14 | -0.11 | -25101.11 | 0.89  | -25070.35 | 3.64  | -25044.86 | 1.11  | -25011.79 | 6.16  | -25002.82 | 1.12  |
| -25159.85 | -1.81 | -25131.12 | -1.09 | -25104.18 | -2.18 | -25072.57 | 1.42  | -25034.93 | 11.04 | -25009.21 | 8.74  | -25001.56 | 2.39  |
| -25160.87 | -2.82 | -25130.44 | -0.42 | -25101.36 | 0.64  | -25074.55 | -0.56 | -25045.34 | 0.63  | -25013.64 | 4.31  | -25001.44 | 2.50  |
| -25160.48 | -2.44 | -25129.30 | 0.72  | -25104.19 | -2.18 | -25069.47 | 4.51  | -25044.53 | 1.44  | -25012.03 | 5.92  | -25002.05 | 1.89  |
| -25160.67 | -2.63 | -25129.50 | 0.52  | -25101.46 | 0.55  | -25072.71 | 1.28  | -25039.04 | 6.93  | -25011.62 | 6.33  | -24999.44 | 4.50  |
| -25161.02 | -2.97 | -25131.70 | -1.68 | -25102.53 | -0.52 | -25071.59 | 2.40  | -25035.56 | 10.41 | -25016.23 | 1.72  | -24999.94 | 4.00  |
| -25160.69 | -2.65 | -25130.84 | -0.82 | -25098.88 | 3.12  | -25073.14 | 0.84  | -25039.75 | 6.22  | -25012.19 | 5.76  | -24997.08 | 6.86  |
| -25160.02 | -1.97 | -25128.88 | 1.14  | -25100.80 | 1.20  | -25073.16 | 0.82  | -25032.69 | 13.28 | -25011.77 | 6.18  | -24996.71 | 7.23  |
| -25161.62 | -3.58 | -25131.42 | -1.39 | -25101.17 | 0.84  | -25073.73 | 0.26  | -25044.57 | 1.40  | -25016.39 | 1.56  | -24998.31 | 5.63  |
| -25159.68 | -1.63 | -25131.01 | -0.99 | -25103.51 | -1.50 | -25073.41 | 0.58  | -25043.37 | 2.60  | -25012.84 | 5.11  | -25002.42 | 1.52  |
| -25160.63 | -2.59 | -25131.38 | -1.36 | -25100.45 | 1.55  | -25068.19 | 5.80  | -25042.24 | 3.73  | -25008.14 | 9.81  | -24988.86 | 15.08 |
| -25161.98 | -3.94 | -25127.03 | 3.00  | -25099.20 | 2.81  | -25069.76 | 4.23  | -25046.80 | -0.83 | -25015.92 | 2.03  | -24994.16 | 9.78  |
| -25160.18 | -2.14 | -25130.77 | -0.74 | -25102.89 | -0.89 | -25072.89 | 1.10  | -25042.24 | 3.73  | -25013.16 | 4.80  | -25003.56 | 0.38  |
| -25161.07 | -3.03 | -25130.54 | -0.51 | -25102.07 | -0.06 | -25071.69 | 2.29  | -25042.08 | 3.89  | -25012.90 | 5.05  | -25001.91 | 2.04  |
| -25160.13 | -2.09 | -25128.06 | 1.96  | -25102.46 | -0.45 | -25072.05 | 1.93  | -25040.18 | 5.79  | -25014.51 | 3.44  | -25000.90 | 3.04  |
| -25161.42 | -3.38 | -25133.12 | -3.09 | -25102.06 | -0.06 | -25072.12 | 1.87  | -25042.23 | 3.74  | -25015.60 | 2.35  | -24997.62 | 6.32  |
| -25155.08 | 2.97  | -25130.03 | -0.01 | -25100.72 | 1.29  | -25072.74 | 1.25  | -25035.90 | 10.07 | -25012.55 | 5.40  | -24997.58 | 6.37  |



|                  |           |                 |                 |                |                |                |                |      |
|------------------|-----------|-----------------|-----------------|----------------|----------------|----------------|----------------|------|
| Average energies | -25160.00 | -1.96 -25130.77 | -0.75 -25100.76 | 1.25 -25071.89 | 2.10 -25042.40 | 3.57 -25013.47 | 4.48 -24999.57 | 4.37 |
|------------------|-----------|-----------------|-----------------|----------------|----------------|----------------|----------------|------|

# Ca<sub>1-x</sub>M<sub>x</sub>ZrTi<sub>2-2x</sub>Fe<sub>2x</sub>O<sub>7</sub> M=(Ce, Pu, Th, U)

## Ti(1)Ti(1)

N.B. All stated energies are in eV

| Ce<br>concentration in solid solution (%)<br>number of atoms | ground state energy |                 | solid solution energy |                 |                  |                 |                  |        |  |  |  |  |  |  |
|--------------------------------------------------------------|---------------------|-----------------|-----------------------|-----------------|------------------|-----------------|------------------|--------|--|--|--|--|--|--|
|                                                              | 3<br>2              | 6<br>4          | 9<br>6                | 12<br>8         | 15<br>10         | 18<br>12        | 21<br>13         |        |  |  |  |  |  |  |
|                                                              | -25143.09           | -0.20 -25097.32 | 2.39 -25048.07        | 8.47 -25001.95  | 11.42 -24955.67  | 14.53 -24912.48 | 14.54 -24881.37  | 24.07  |  |  |  |  |  |  |
|                                                              | -25143.77           | -0.88 -25096.21 | 3.50 -25044.61        | 11.93 -25002.53 | 10.84 -24955.44  | 14.76 -24910.93 | 16.10 -24883.92  | 21.52  |  |  |  |  |  |  |
|                                                              | -25143.26           | -0.37 -25097.77 | 1.95 -25049.75        | 6.80 -25002.41  | 10.96 -24955.22  | 14.98 -24908.04 | 18.98 -24883.33  | 22.11  |  |  |  |  |  |  |
|                                                              | -25143.88           | -1.00 -25096.06 | 3.65 -25046.96        | 9.58 -25001.93  | 11.44 -24953.59  | 16.61 -24908.93 | 18.09 -24924.96  | -19.52 |  |  |  |  |  |  |
|                                                              | -25143.62           | -0.73 -25098.08 | 1.64 -25046.99        | 9.55 -25005.70  | 7.67 -24956.25   | 13.95 -24908.66 | 18.36 -24884.41  | 21.02  |  |  |  |  |  |  |
|                                                              | -25142.70           | 0.19 -25097.26  | 2.46 -25050.58        | 5.96 -25004.89  | 8.48 -24955.58   | 14.62 -24906.61 | 20.42 -24885.36  | 20.08  |  |  |  |  |  |  |
|                                                              | -25143.03           | -0.14 -25097.82 | 1.89 -25051.39        | 5.16 -24998.16  | 15.21 -24954.15  | 16.05 -24913.27 | 13.75 -24884.59  | 20.84  |  |  |  |  |  |  |
|                                                              | -25144.72           | -1.83 -25094.80 | 4.91 -25050.24        | 6.30 -25000.64  | 12.73 -24956.18  | 14.02 -24907.15 | 19.88 -24875.30  | 30.14  |  |  |  |  |  |  |
|                                                              | -25144.71           | -1.82 -25098.28 | 1.43 -25051.44        | 5.11 -24998.07  | 15.30 -24956.06  | 14.13 -24903.84 | 23.19 -24887.15  | 18.28  |  |  |  |  |  |  |
|                                                              | -25144.26           | -1.37 -25098.50 | 1.22 -25048.52        | 8.02 -25001.82  | 11.55 -24958.31  | 11.88 -24906.61 | 20.41 -24888.91  | 16.53  |  |  |  |  |  |  |
|                                                              | -25145.43           | -2.54 -25096.56 | 3.16 -25052.34        | 4.20 -25002.16  | 11.21 -24956.77  | 13.42 -24910.82 | 16.20 -24889.51  | 15.93  |  |  |  |  |  |  |
|                                                              | -25145.38           | -2.49 -25093.51 | 6.21 -25046.34        | 10.21 -25001.30 | 12.07 -24954.58  | 15.61 -24906.90 | 20.12 -24887.26  | 18.17  |  |  |  |  |  |  |
|                                                              | -25144.95           | -2.06 -25097.59 | 2.13 -25050.77        | 5.77 -25045.55  | -32.18 -24954.03 | 16.17 -24913.66 | 13.36 -24885.47  | 19.96  |  |  |  |  |  |  |
|                                                              | -25144.61           | -1.72 -25096.78 | 2.94 -25048.98        | 7.57 -24999.28  | 14.09 -24956.18  | 14.01 -24907.65 | 19.37 -24884.59  | 20.85  |  |  |  |  |  |  |
|                                                              | -25145.55           | -2.66 -25097.97 | 1.75 -25049.69        | 6.86 -25002.96  | 10.41 -24958.11  | 12.08 -24910.25 | 16.77 -24883.08  | 22.36  |  |  |  |  |  |  |
|                                                              | -25144.49           | -1.60 -25094.30 | 5.41 -25047.11        | 9.43 -25003.14  | 10.23 -24955.00  | 15.20 -24905.78 | 21.24 -24882.36  | 23.07  |  |  |  |  |  |  |
|                                                              | -25144.11           | -1.22 -25095.81 | 3.90 -25048.63        | 7.91 -25003.99  | 9.38 -24958.50   | 11.69 -24910.59 | 16.43 -24885.00  | 20.44  |  |  |  |  |  |  |
|                                                              | -25143.34           | -0.45 -25097.14 | 2.58 -25051.41        | 5.13 -25003.27  | 10.10 -24956.55  | 13.65 -24910.39 | 16.63 -24885.97  | 19.47  |  |  |  |  |  |  |
|                                                              | -25142.64           | 0.25 -25096.66  | 3.06 -25047.93        | 8.61 -25000.94  | 12.43 -24953.80  | 16.39 -24907.81 | 19.21 -24882.92  | 22.52  |  |  |  |  |  |  |
|                                                              | -25145.67           | -2.78 -25099.75 | -0.04 -25049.81       | 6.73 -25004.33  | 9.04 -24952.70   | 17.49 -24910.10 | 16.93 -24881.28  | 24.15  |  |  |  |  |  |  |
|                                                              | -25143.57           | -0.68 -25098.63 | 1.08 -25050.58        | 5.96 -25000.60  | 12.77 -24955.16  | 15.04 -24904.49 | 22.53 -24883.12  | 22.31  |  |  |  |  |  |  |
|                                                              | -25144.87           | -1.98 -25095.86 | 3.85 -25045.78        | 10.76 -25003.87 | 9.50 -24953.74   | 16.46 -24908.80 | 18.23 -24888.93  | 16.51  |  |  |  |  |  |  |
|                                                              | -25143.95           | -1.06 -25097.41 | 2.30 -25051.07        | 5.47 -24998.66  | 14.71 -24957.78  | 12.42 -24908.41 | 18.62 -24884.89  | 20.55  |  |  |  |  |  |  |
|                                                              | -25143.81           | -0.92 -25096.77 | 2.95 -25050.62        | 5.93 -25006.13  | 7.24 -24955.42   | 14.77 -24950.02 | -23.00 -24886.73 | 18.70  |  |  |  |  |  |  |
|                                                              | -25144.82           | -1.93 -25097.91 | 1.80 -25050.74        | 5.80 -25001.31  | 12.06 -24953.03  | 17.16 -24905.59 | 21.43 -24888.89  | 16.55  |  |  |  |  |  |  |
|                                                              | -25144.61           | -1.73 -25097.47 | 2.25 -25050.96        | 5.59 -25004.03  | 9.34 -24956.16   | 14.04 -24911.83 | 15.19 -24884.14  | 21.30  |  |  |  |  |  |  |
|                                                              | -25144.19           | -1.30 -25097.62 | 2.09 -25048.89        | 7.65 -25002.93  | 10.44 -24955.09  | 15.10 -24884.37 | 42.65 -24884.49  | 20.95  |  |  |  |  |  |  |
|                                                              | -25144.19           | -1.31 -25097.69 | 2.02 -25048.41        | 8.14 -25001.25  | 12.12 -24956.79  | 13.40 -24909.39 | 17.64 -24883.29  | 22.15  |  |  |  |  |  |  |
|                                                              | -25144.12           | -1.23 -25097.27 | 2.45 -25002.11        | 54.43 -24954.39 | 58.98 -24908.44  | 61.75 -24910.68 | 16.34 -24882.63  | 22.80  |  |  |  |  |  |  |

|           |       |           |       |           |       |           |       |           |       |           |        |           |        |
|-----------|-------|-----------|-------|-----------|-------|-----------|-------|-----------|-------|-----------|--------|-----------|--------|
| -25144.69 | -1.80 | -25099.77 | -0.05 | -25051.45 | 5.10  | -25000.40 | 12.97 | -24955.58 | 14.62 | -24952.97 | -25.95 | -24887.50 | 17.93  |
| -25142.18 | 0.70  | -25096.86 | 2.86  | -25048.63 | 7.91  | -25002.33 | 11.04 | -24956.07 | 14.13 | -24909.76 | 17.26  | -24881.11 | 24.32  |
| -25144.39 | -1.50 | -25098.66 | 1.05  | -25048.24 | 8.30  | -24994.42 | 18.95 | -24955.15 | 15.05 | -24911.11 | 15.91  | -24889.15 | 16.29  |
| -25144.21 | -1.32 | -25095.90 | 3.82  | -25049.52 | 7.03  | -25000.52 | 12.85 | -24952.81 | 17.38 | -24911.50 | 15.53  | -24878.47 | 26.96  |
| -25143.50 | -0.61 | -25096.03 | 3.69  | -25051.55 | 5.00  | -25003.14 | 10.23 | -24953.73 | 16.46 | -24910.89 | 16.14  | -24884.23 | 21.21  |
| -25144.97 | -2.09 | -25096.56 | 3.15  | -25052.64 | 3.90  | -25005.52 | 7.85  | -24957.50 | 12.70 | -24909.89 | 17.13  | -24883.16 | 22.28  |
| -25145.00 | -2.11 | -25097.77 | 1.95  | -25051.03 | 5.52  | -25003.83 | 9.54  | -24954.47 | 15.73 | -24910.90 | 16.12  | -24884.43 | 21.00  |
| -25145.19 | -2.30 | -25097.16 | 2.55  | -25049.48 | 7.06  | -25004.02 | 9.35  | -24956.90 | 13.29 | -24910.45 | 16.57  | -24884.84 | 20.60  |
| -25143.67 | -0.78 | -25095.30 | 4.41  | -25048.43 | 8.11  | -25000.84 | 12.53 | -24951.19 | 19.01 | -24904.99 | 22.03  | -24888.56 | 16.88  |
| -25142.78 | 0.11  | -25096.80 | 2.91  | -25049.12 | 7.42  | -25004.21 | 9.16  | -24955.85 | 14.35 | -24909.26 | 17.77  | -24882.46 | 22.97  |
| -25145.99 | -3.11 | -25098.44 | 1.27  | -25050.11 | 6.44  | -25005.36 | 8.00  | -24957.39 | 12.80 | -24908.66 | 18.37  | -24887.21 | 18.23  |
| -25145.57 | -2.68 | -25098.95 | 0.77  | -25045.23 | 11.32 | -25002.66 | 10.71 | -24955.57 | 14.63 | -24907.95 | 19.07  | -24926.84 | -21.41 |
| -25144.08 | -1.19 | -25095.42 | 4.30  | -25049.47 | 7.07  | -25002.35 | 11.02 | -24955.26 | 14.93 | -24910.41 | 16.61  | -24887.86 | 17.58  |
| -25144.71 | -1.82 | -25095.30 | 4.42  | -25050.24 | 6.30  | -25005.18 | 8.19  | -24958.15 | 12.05 | -24904.70 | 22.32  | -24886.02 | 19.42  |
| -25144.94 | -2.06 | -25097.17 | 2.55  | -25050.12 | 6.42  | -25000.04 | 13.33 | -24958.97 | 11.23 | -24908.33 | 18.69  | -24884.14 | 21.30  |
| -25143.90 | -1.01 | -25098.44 | 1.27  | -25049.61 | 6.94  | -25002.37 | 11.00 | -24952.05 | 18.15 | -24906.36 | 20.66  | -24889.21 | 16.23  |
| -25143.24 | -0.35 | -25098.38 | 1.34  | -25043.33 | 13.21 | -25004.81 | 8.56  | -24953.27 | 16.92 | -24909.45 | 17.57  | -24877.76 | 27.68  |
| -25145.20 | -2.31 | -25095.73 | 3.99  | -25050.33 | 6.21  | -25003.21 | 10.16 | -24957.46 | 12.74 | -24909.53 | 17.49  | -24879.03 | 26.40  |
| -25142.45 | 0.44  | -25095.22 | 4.49  | -25050.43 | 6.11  | -25005.68 | 7.69  | -24958.50 | 11.70 | -24910.79 | 16.23  | -24885.90 | 19.54  |
| -25144.77 | -1.88 | -25094.85 | 4.86  | -25051.09 | 5.45  | -25001.64 | 11.73 | -24954.03 | 16.16 | -24906.26 | 20.76  | -24887.03 | 18.41  |
| -25144.09 | -1.20 | -25093.20 | 6.52  | -25050.22 | 6.32  | -25001.23 | 12.14 | -24954.35 | 15.84 | -24909.87 | 17.15  | -24880.36 | 25.07  |
| -25145.75 | -2.86 | -25097.52 | 2.20  | -25051.14 | 5.40  | -25001.58 | 11.79 | -24957.02 | 13.18 | -24904.11 | 22.91  | -24883.98 | 21.46  |
| -25145.34 | -2.45 | -25097.95 | 1.76  | -25049.34 | 7.20  | -24997.87 | 15.50 | -24953.23 | 16.96 | -24908.21 | 18.81  | -24884.36 | 21.08  |
| -25143.85 | -0.97 | -25097.81 | 1.91  | -25051.00 | 5.54  | -25004.07 | 9.30  | -24958.34 | 11.85 | -24908.64 | 18.38  | -24887.23 | 18.20  |
| -25144.25 | -1.37 | -25098.82 | 0.90  | -25053.19 | 3.36  | -25002.86 | 10.51 | -24955.63 | 14.57 | -24906.29 | 20.73  | -24880.78 | 24.65  |
| -25143.43 | -0.54 | -25098.27 | 1.44  | -25048.52 | 8.02  | -25001.17 | 12.20 | -24957.49 | 12.70 | -24909.91 | 17.11  | -24886.04 | 19.40  |
| -25144.77 | -1.88 | -25097.15 | 2.57  | -25051.02 | 5.52  | -24999.90 | 13.47 | -24955.79 | 14.41 | -24909.55 | 17.47  | -24885.86 | 19.58  |
| -25144.62 | -1.73 | -25096.55 | 3.17  | -25050.62 | 5.92  | -25001.64 | 11.73 | -24957.99 | 12.20 | -24902.08 | 24.95  | -24888.22 | 17.22  |
| -25145.80 | -2.91 | -25097.21 | 2.51  | -25052.18 | 4.37  | -24998.99 | 14.37 | -24958.83 | 11.36 | -24904.54 | 22.48  | -24882.47 | 22.97  |
| -25144.88 | -1.99 | -25096.57 | 3.15  | -25043.58 | 12.96 | -25006.40 | 6.97  | -24955.92 | 14.27 | -24905.85 | 21.17  | -24883.27 | 22.16  |
| -25144.53 | -1.64 | -25097.09 | 2.62  | -25049.40 | 7.15  | -24999.41 | 13.96 | -24957.70 | 12.49 | -24906.47 | 20.55  | -24888.62 | 16.82  |
| -25144.72 | -1.83 | -25099.40 | 0.32  | -25047.62 | 8.92  | -25002.57 | 10.80 | -24953.99 | 16.20 | -24913.19 | 13.84  | -24882.68 | 22.75  |
| -25142.28 | 0.61  | -25098.64 | 1.08  | -25052.05 | 4.49  | -25003.03 | 10.34 | -24954.39 | 15.81 | -24906.91 | 20.11  | -24885.55 | 19.88  |
| -25145.34 | -2.45 | -25098.03 | 1.68  | -25051.72 | 4.82  | -25001.85 | 11.52 | -24951.71 | 18.49 | -24908.19 | 18.83  | -24885.92 | 19.52  |
| -25143.66 | -0.77 | -25097.55 | 2.17  | -25049.89 | 6.66  | -25002.27 | 11.10 | -24955.56 | 14.63 | -24913.11 | 13.91  | -24880.61 | 24.83  |
| -25144.15 | -1.26 | -25097.63 | 2.08  | -25048.26 | 8.28  | -24999.57 | 13.79 | -24940.15 | 30.05 | -24909.55 | 17.48  | -24888.59 | 16.85  |
| -25145.81 | -2.92 | -25098.97 | 0.75  | -25047.95 | 8.59  | -25006.30 | 7.07  | -24957.02 | 13.18 | -24909.14 | 17.89  | -24883.32 | 22.12  |
| -25145.82 | -2.93 | -25095.64 | 4.08  | -25049.42 | 7.12  | -25003.93 | 9.44  | -24958.13 | 12.06 | -24910.33 | 16.69  | -24885.19 | 20.25  |
| -25143.98 | -1.09 | -25097.73 | 1.99  | -25050.38 | 6.16  | -25004.19 | 9.18  | -24956.62 | 13.58 | -24906.74 | 20.28  | -24883.22 | 22.21  |
| -25142.03 | 0.86  | -25098.01 | 1.71  | -25046.89 | 9.65  | -25004.74 | 8.63  | -24954.54 | 15.66 | -24910.38 | 16.64  | -24884.92 | 20.52  |
| -25144.35 | -1.46 | -25098.49 | 1.23  | -25050.54 | 6.00  | -25005.15 | 8.22  | -24953.27 | 16.93 | -24908.22 | 18.80  | -24878.73 | 26.70  |

|           |       |           |      |           |       |           |       |           |       |           |       |           |       |
|-----------|-------|-----------|------|-----------|-------|-----------|-------|-----------|-------|-----------|-------|-----------|-------|
| -25144.39 | -1.50 | -25097.20 | 2.51 | -25051.01 | 5.53  | -24998.56 | 14.81 | -24953.69 | 16.51 | -24910.38 | 16.64 | -24883.39 | 22.04 |
| -25143.47 | -0.59 | -25098.06 | 1.65 | -25049.57 | 6.97  | -25000.30 | 13.07 | -24957.46 | 12.74 | -24910.07 | 16.95 | -24884.36 | 21.08 |
| -25144.90 | -2.01 | -25095.93 | 3.79 | -25050.47 | 6.08  | -25003.22 | 10.15 | -24951.54 | 18.66 | -24905.13 | 21.89 | -24882.02 | 23.41 |
| -25144.88 | -1.99 | -25096.20 | 3.51 | -25051.64 | 4.91  | -25000.00 | 13.36 | -24957.66 | 12.53 | -24910.53 | 16.50 | -24887.72 | 17.71 |
| -25144.81 | -1.93 | -25097.26 | 2.46 | -25048.76 | 7.78  | -25004.62 | 8.75  | -24954.29 | 15.90 | -24908.04 | 18.98 | -24884.94 | 20.50 |
| -25143.86 | -0.97 | -25096.38 | 3.34 | -25052.08 | 4.46  | -25001.53 | 11.84 | -24954.69 | 15.50 | -24911.97 | 15.05 | -24877.70 | 27.74 |
| -25146.37 | -3.48 | -25098.50 | 1.21 | -25050.13 | 6.41  | -25000.41 | 12.96 | -24951.43 | 18.76 | -24905.94 | 21.08 | -24880.85 | 24.59 |
| -25144.41 | -1.53 | -25098.82 | 0.89 | -25047.92 | 8.62  | -25003.59 | 9.78  | -24955.99 | 14.21 | -24912.23 | 14.79 | -24881.97 | 23.46 |
| -25144.05 | -1.16 | -25099.12 | 0.60 | -25049.35 | 7.19  | -25001.96 | 11.41 | -24953.48 | 16.72 | -24883.28 | 43.74 | -24887.78 | 17.66 |
| -25145.37 | -2.48 | -25095.60 | 4.11 | -25044.58 | 11.96 | -25002.82 | 10.55 | -24955.52 | 14.68 | -24910.74 | 16.28 | -24883.07 | 22.37 |
| -25144.52 | -1.64 | -25098.31 | 1.40 | -25050.89 | 5.65  | -25001.02 | 12.35 | -24958.74 | 11.46 | -24904.70 | 22.32 | -24889.63 | 15.81 |
| -25144.82 | -1.93 | -25097.52 | 2.20 | -25047.25 | 9.29  | -24995.43 | 17.94 | -24956.48 | 13.71 | -24906.44 | 20.58 | -24880.05 | 25.38 |
| -25144.41 | -1.52 | -25096.86 | 2.86 | -25048.51 | 8.04  | -24956.31 | 57.06 | -24955.74 | 14.46 | -24907.82 | 19.20 | -24885.45 | 19.99 |
| -25143.87 | -0.98 | -25097.59 | 2.13 | -25050.41 | 6.14  | -25005.96 | 7.41  | -24904.33 | 65.87 | -24910.34 | 16.68 | -24885.11 | 20.33 |
| -25143.78 | -0.89 | -25098.89 | 0.83 | -25048.90 | 7.64  | -25000.30 | 13.07 | -24955.26 | 14.93 | -24912.68 | 14.34 | -24887.25 | 18.19 |
| -25144.68 | -1.79 | -25096.51 | 3.21 | -25050.95 | 5.59  | -25004.32 | 9.05  | -24956.72 | 13.48 | -24907.10 | 19.93 | -24883.55 | 21.88 |
| -25143.48 | -0.60 | -25095.83 | 3.89 | -25050.49 | 6.05  | -24998.03 | 15.34 | -24953.71 | 16.48 | -24906.18 | 20.84 | -24882.23 | 23.20 |
| -25144.21 | -1.32 | -25096.17 | 3.55 | -25050.96 | 5.58  | -25003.90 | 9.47  | -24955.59 | 14.60 | -24909.36 | 17.66 | -24879.87 | 25.56 |
| -25145.22 | -2.33 | -25095.38 | 4.34 | -25052.61 | 3.93  | -24997.21 | 16.16 | -24947.81 | 22.39 | -24910.49 | 16.54 | -24885.65 | 19.79 |
| -25145.27 | -2.38 | -25098.45 | 1.27 | -25050.03 | 6.51  | -25004.02 | 9.35  | -24956.18 | 14.01 | -24911.89 | 15.13 | -24885.10 | 20.33 |
| -25145.52 | -2.63 | -25099.11 | 0.61 | -25049.84 | 6.70  | -24999.61 | 13.76 | -24960.14 | 10.06 | -24912.18 | 14.84 | -24886.52 | 18.91 |
| -25144.45 | -1.56 | -25097.26 | 2.45 | -25050.36 | 6.19  | -25001.18 | 12.19 | -24957.19 | 13.00 | -24909.03 | 17.99 | -24886.60 | 18.84 |
| -25143.83 | -0.94 | -25099.00 | 0.71 | -25050.83 | 5.71  | -25005.15 | 8.22  | -24953.81 | 16.39 | -24904.77 | 22.26 | -24879.33 | 26.11 |
| -25144.48 | -1.59 | -25099.38 | 0.33 | -25049.95 | 6.59  | -25004.66 | 8.71  | -24953.41 | 16.78 | -24907.90 | 19.13 | -24882.02 | 23.42 |
| -25144.80 | -1.91 | -25093.70 | 6.02 | -25048.56 | 7.98  | -25003.56 | 9.81  | -24954.04 | 16.16 | -24910.75 | 16.28 | -24885.95 | 19.49 |
| -25143.85 | -0.96 | -25097.55 | 2.16 | -25050.27 | 6.27  | -25004.07 | 9.30  | -24953.66 | 16.54 | -24904.64 | 22.38 | -24883.03 | 22.40 |
| -25145.81 | -2.93 | -25098.95 | 0.77 | -25050.98 | 5.56  | -25001.97 | 11.40 | -24956.59 | 13.61 | -24906.88 | 20.14 | -24886.28 | 19.16 |
| -25145.44 | -2.55 | -25098.15 | 1.57 | -25048.81 | 7.73  | -25003.40 | 9.97  | -24955.97 | 14.22 | -24908.91 | 18.11 | -24882.03 | 23.41 |
| -25145.27 | -2.38 | -25096.45 | 3.27 | -25049.24 | 7.30  | -24999.41 | 13.96 | -24955.61 | 14.59 | -24906.07 | 20.95 | -24885.77 | 19.67 |
| -25144.51 | -1.62 | -25098.84 | 0.87 | -25048.46 | 8.09  | -25001.34 | 12.03 | -24955.65 | 14.55 | -24905.20 | 21.83 | -24885.34 | 20.10 |
| -25144.58 | -1.69 | -25098.72 | 1.00 | -25049.72 | 6.83  | -25000.58 | 12.79 | -24956.04 | 14.15 | -24906.68 | 20.34 | -24886.71 | 18.73 |
| -25144.73 | -1.84 | -25096.21 | 3.51 | -25047.64 | 8.90  | -25003.75 | 9.62  | -24954.69 | 15.51 | -24909.99 | 17.03 | -24886.19 | 19.25 |
| -25143.34 | -0.45 | -25098.61 | 1.10 | -25051.38 | 5.16  | -25001.48 | 11.89 | -24954.79 | 15.41 | -24908.45 | 18.57 | -24885.44 | 19.99 |
| -25145.63 | -2.75 | -25097.52 | 2.19 | -25049.21 | 7.33  | -25001.41 | 11.96 | -24957.04 | 13.15 | -24909.38 | 17.65 | -24890.11 | 15.33 |
| -25145.04 | -2.15 | -25094.87 | 4.84 | -25047.83 | 8.71  | -25002.03 | 11.34 | -24958.36 | 11.84 | -24906.99 | 20.04 | -24884.91 | 20.52 |
| -25144.00 | -1.11 | -25097.57 | 2.15 | -25048.64 | 7.91  | -25001.77 | 11.60 | -24955.19 | 15.00 | -24906.22 | 20.81 | -24886.72 | 18.72 |
| -25144.93 | -2.04 | -25096.58 | 3.14 | -25049.87 | 6.68  | -25000.92 | 12.45 | -24957.88 | 12.32 | -24906.77 | 20.25 | -24878.18 | 27.25 |
| -25144.15 | -1.26 | -25099.22 | 0.49 | -25051.34 | 5.21  | -25003.99 | 9.38  | -24958.37 | 11.83 | -24910.04 | 16.99 | -24883.29 | 22.14 |
| -25143.47 | -0.58 | -25097.03 | 2.68 | -25047.73 | 8.81  | -25003.75 | 9.62  | -24954.72 | 15.47 | -24908.37 | 18.66 | -24887.97 | 17.46 |
| -25142.99 | -0.10 | -25095.10 | 4.62 | -25051.03 | 5.51  | -25003.51 | 9.86  | -24956.18 | 14.02 | -24908.28 | 18.74 | -24886.51 | 18.93 |
| -25144.12 | -1.24 | -25097.40 | 2.31 | -25049.73 | 6.81  | -25001.90 | 11.47 | -24957.50 | 12.69 | -24908.75 | 18.28 | -24887.05 | 18.39 |

|           |       |           |           |           |      |           |       |           |       |           |       |           |       |
|-----------|-------|-----------|-----------|-----------|------|-----------|-------|-----------|-------|-----------|-------|-----------|-------|
| -25144.36 | -1.47 | -25097.77 | 1.95      | -25050.90 | 5.64 | -25002.55 | 10.82 | -24957.03 | 13.17 | -24878.58 | 48.44 | -24888.39 | 17.04 |
| -25145.03 | -2.14 | -25098.33 | 1.39      | -25049.93 | 6.62 | -25000.09 | 13.28 | -24951.79 | 18.41 |           |       | -24886.68 | 18.76 |
| -25144.49 | -1.60 | -25097.83 | 1.89      | -25050.98 | 5.56 | -25002.47 | 10.90 | -24958.14 | 12.05 |           |       | -24886.59 | 18.85 |
| -25144.72 | -1.84 | -25096.97 | 2.75      | -25047.48 | 9.06 | -25000.32 | 13.05 | -24946.92 | 23.28 |           |       |           |       |
| -25144.72 | -1.83 | -25095.96 | 3.76      | -25051.91 | 4.64 | -24992.48 | 20.89 | -24952.88 | 17.32 |           |       |           |       |
| -25143.46 | -0.57 | -25098.22 | 1.49      | -25049.14 | 7.40 |           |       | -24959.72 | 10.48 |           |       |           |       |
| -25146.25 | -3.36 |           | -25051.12 | 5.43      |      |           |       | -24949.09 | 21.10 |           |       |           |       |
| -25144.07 | -1.18 |           |           |           |      |           |       |           |       |           |       |           |       |
| -25144.98 | -2.10 |           |           |           |      |           |       |           |       |           |       |           |       |

Average energies      -25144.4   -1.51153   -25097.3   2.46279   -25049.2   7.346962   -25001.6   11.72851   -24954.5   15.69946   -24908.7   18.36525   -24885.3   20.13808

## Pu

ground    solid  
state      solution  
energy    energy

concentration in solid solution (%)  
number of atoms

|           | 3     | 6         | 9     | 12        | 15   | 18        | 21    |           |       |           |       |           |        |
|-----------|-------|-----------|-------|-----------|------|-----------|-------|-----------|-------|-----------|-------|-----------|--------|
|           | 2     | 4         | 6     | 8         | 10   | 12        | 13    |           |       |           |       |           |        |
| -25138.27 | -1.37 | -25086.45 | 1.29  | -25032.30 | 6.28 | -24980.53 | 8.90  | -24925.94 | 14.33 | -24875.55 | 15.56 | -24847.04 | 19.49  |
| -25138.28 | -1.37 | -25087.18 | 0.57  | -25031.43 | 7.15 | -24981.67 | 7.76  | -24930.26 | 10.01 | -24868.16 | 22.95 | -24848.04 | 18.49  |
| -25138.12 | -1.22 | -25086.34 | 1.40  | -25032.34 | 6.25 | -24979.71 | 9.72  | -24925.73 | 14.54 | -24875.37 | 15.74 | -24850.56 | 15.97  |
| -25138.50 | -1.59 | -25085.18 | 2.56  | -25030.81 | 7.77 | -24979.67 | 9.75  | -24926.34 | 13.92 | -24877.81 | 13.30 | -24887.56 | -21.03 |
| -25139.20 | -2.30 | -25087.74 | 0.01  | -25033.82 | 4.76 | -24979.37 | 10.06 | -24924.64 | 15.63 | -24872.37 | 18.74 | -24849.53 | 17.00  |
| -25138.50 | -1.59 | -25086.48 | 1.26  | -25034.22 | 4.36 | -24978.55 | 10.88 | -24926.30 | 13.96 | -24875.29 | 15.82 | -24847.47 | 19.06  |
| -25137.07 | -0.17 | -25087.48 | 0.27  | -25034.19 | 4.40 | -24981.02 | 8.41  | -24926.11 | 14.16 | -24872.20 | 18.91 | -24845.87 | 20.66  |
| -25139.40 | -2.49 | -25086.43 | 1.31  | -25032.03 | 6.56 | -24982.81 | 6.61  | -24927.28 | 12.98 | -24876.89 | 14.22 | -24849.27 | 17.26  |
| -25139.10 | -2.19 | -25086.91 | 0.83  | -25034.92 | 3.67 | -24977.69 | 11.74 | -24927.59 | 12.68 | -24879.46 | 11.65 | -24854.92 | 11.61  |
| -25139.61 | -2.71 | -25086.96 | 0.79  | -25034.06 | 4.53 | -24979.59 | 9.84  | -24926.74 | 13.53 | -24876.49 | 14.62 | -24850.27 | 16.26  |
| -25139.10 | -2.20 | -25086.05 | 1.69  | -25034.96 | 3.63 | -24982.14 | 7.28  | -24930.70 | 9.57  | -24876.15 | 14.96 | -24852.33 | 14.20  |
| -25138.80 | -1.90 | -25086.01 | 1.73  | -25031.72 | 6.86 | -24983.56 | 5.86  | -24926.00 | 14.27 | -24876.08 | 15.03 | -24854.44 | 12.09  |
| -25138.07 | -1.16 | -25085.36 | 2.38  | -25032.42 | 6.17 | -24977.17 | 12.25 | -24927.10 | 13.17 | -24875.93 | 15.18 | -24846.71 | 19.82  |
| -25139.72 | -2.81 | -25084.47 | 3.28  | -25033.98 | 4.60 | -24981.56 | 7.86  | -24926.92 | 13.35 | -24871.97 | 19.14 | -24847.88 | 18.65  |
| -25138.20 | -1.30 | -25086.12 | 1.63  | -25034.17 | 4.42 | -24984.10 | 5.33  | -24928.01 | 12.25 | -24876.74 | 14.37 | -24848.69 | 17.84  |
| -25138.57 | -1.66 | -25083.72 | 4.02  | -25031.14 | 7.44 | -24979.50 | 9.92  | -24929.05 | 11.21 | -24873.83 | 17.28 | -24849.43 | 17.10  |
| -25139.03 | -2.13 | -25087.97 | -0.22 | -25031.88 | 6.71 | -24982.81 | 6.61  | -24926.60 | 13.67 | -24877.60 | 13.51 | -24848.73 | 17.80  |
| -25136.96 | -0.05 | -25083.18 | 4.57  | -25033.05 | 5.54 | -24979.65 | 9.78  | -24927.53 | 12.74 | -24876.69 | 14.41 | -24851.72 | 14.81  |
| -25138.68 | -1.77 | -25085.64 | 2.10  | -25030.70 | 7.88 | -24976.25 | 13.18 | -24929.92 | 10.35 | -24872.54 | 18.57 | -24852.46 | 14.07  |
| -25138.47 | -1.56 | -25087.78 | -0.04 | -25034.66 | 3.92 | -24980.87 | 8.55  | -24929.79 | 10.48 | -24877.56 | 13.55 | -24851.63 | 14.90  |
| -25138.93 | -2.03 | -25084.54 | 3.20  | -25035.37 | 3.22 | -24982.40 | 7.03  | -24924.95 | 15.32 | -24875.98 | 15.13 | -24844.60 | 21.93  |
| -25138.48 | -1.58 | -25084.99 | 2.75  | -25030.63 | 7.96 | -24981.79 | 7.63  | -24928.56 | 11.71 | -24875.51 | 15.60 | -24852.26 | 14.27  |
| -25137.29 | -0.38 | -25086.52 | 1.22  | -25032.68 | 5.90 | -24979.79 | 9.63  | -24927.74 | 12.52 | -24871.59 | 19.52 | -24845.43 | 21.10  |

|           |       |           |      |           |      |           |       |           |       |           |       |           |       |
|-----------|-------|-----------|------|-----------|------|-----------|-------|-----------|-------|-----------|-------|-----------|-------|
| -25139.77 | -2.86 | -25086.57 | 1.18 | -25033.15 | 5.44 | -24981.93 | 7.50  | -24927.52 | 12.75 | -24876.60 | 14.51 | -24852.10 | 14.43 |
| -25137.77 | -0.87 | -25085.13 | 2.62 | -25033.27 | 5.31 | -24981.13 | 8.29  | -24930.29 | 9.98  | -24874.26 | 16.85 | -24851.15 | 15.38 |
| -25138.73 | -1.83 | -25084.88 | 2.87 | -25033.91 | 4.67 | -24982.69 | 6.74  | -24929.20 | 11.07 | -24876.14 | 14.97 | -24848.59 | 17.94 |
| -25139.47 | -2.56 | -25086.35 | 1.39 | -25033.94 | 4.65 | -24978.47 | 10.96 | -24924.91 | 15.36 | -24874.97 | 16.14 | -24850.11 | 16.42 |
| -25137.41 | -0.51 | -25087.16 | 0.58 | -25029.48 | 9.11 | -24982.16 | 7.26  | -24927.63 | 12.64 | -24876.70 | 14.41 | -24847.32 | 19.21 |
| -25139.79 | -2.89 | -25085.95 | 1.79 | -25033.64 | 4.95 | -24978.90 | 10.52 | -24925.82 | 14.45 | -24869.11 | 22.00 | -24847.44 | 19.09 |
| -25137.64 | -0.74 | -25086.91 | 0.84 | -25034.41 | 4.17 | -24979.82 | 9.60  | -24930.55 | 9.72  | -24873.79 | 17.31 | -24851.66 | 14.87 |
| -25138.56 | -1.66 | -25085.70 | 2.04 | -25032.31 | 6.28 | -24981.38 | 8.04  | -24927.74 | 12.53 | -24870.42 | 20.69 | -24851.08 | 15.45 |
| -25138.57 | -1.67 | -25086.76 | 0.98 | -25034.76 | 3.82 | -24975.63 | 13.79 | -24925.50 | 14.77 | -24876.38 | 14.73 | -24849.66 | 16.87 |
| -25139.34 | -2.43 | -25085.62 | 2.13 | -25032.05 | 6.54 | -24966.55 | 22.88 | -24928.32 | 11.94 | -24871.86 | 19.25 | -24846.59 | 19.94 |
| -25137.94 | -1.04 | -25085.63 | 2.11 | -25031.49 | 7.10 | -24981.79 | 7.63  | -24926.07 | 14.20 | -24873.40 | 17.71 | -24851.37 | 15.16 |
| -25139.35 | -2.45 | -25084.17 | 3.58 | -25033.41 | 5.17 | -24983.47 | 5.95  | -24931.70 | 8.57  | -24874.20 | 16.91 | -24852.54 | 13.99 |
| -25137.63 | -0.72 | -25086.77 | 0.98 | -25031.84 | 6.75 | -24981.23 | 8.20  | -24925.14 | 15.13 | -24874.32 | 16.79 | -24851.19 | 15.34 |
| -25138.88 | -1.98 | -25087.13 | 0.61 | -25033.19 | 5.40 | -24980.49 | 8.94  | -24928.06 | 12.21 | -24878.11 | 13.00 | -24852.65 | 13.88 |
| -25138.58 | -1.68 | -25084.84 | 2.90 | -25030.15 | 8.43 | -24978.82 | 10.60 | -24928.22 | 12.05 | -24878.28 | 12.83 | -24849.55 | 16.98 |
| -25138.14 | -1.24 | -25086.61 | 1.13 | -25030.19 | 8.39 | -24980.66 | 8.77  | -24925.84 | 14.43 | -24876.98 | 14.13 | -24848.63 | 17.90 |
| -25139.47 | -2.56 | -25086.24 | 1.51 | -25035.05 | 3.54 | -24981.82 | 7.61  | -24930.63 | 9.64  | -24876.76 | 14.35 | -24847.48 | 19.05 |
| -25136.89 | 0.01  | -25087.08 | 0.67 | -25036.08 | 2.51 | -24979.05 | 10.38 | -24926.25 | 14.02 | -24877.16 | 13.95 | -24852.50 | 14.03 |
| -25138.35 | -1.45 | -25084.84 | 2.90 | -25033.54 | 5.04 | -24985.11 | 4.32  | -24928.65 | 11.62 | -24873.62 | 17.49 | -24855.29 | 11.24 |
| -25139.24 | -2.33 | -25085.18 | 2.57 | -25034.01 | 4.58 | -24981.36 | 8.06  | -24930.00 | 10.27 | -24874.49 | 16.62 | -24847.46 | 19.07 |
| -25138.76 | -1.86 | -25086.53 | 1.22 | -25034.22 | 4.36 | -24979.32 | 10.11 | -24927.04 | 13.22 | -24872.17 | 18.94 | -24851.38 | 15.15 |
| -25137.59 | -0.68 | -25086.17 | 1.57 | -25034.19 | 4.39 | -24979.58 | 9.84  | -24929.20 | 11.07 | -24878.99 | 12.12 | -24848.26 | 18.27 |
| -25137.61 | -0.71 | -25085.55 | 2.19 | -25031.85 | 6.74 | -24984.13 | 5.30  | -24926.72 | 13.55 | -24872.15 | 18.96 | -24849.13 | 17.40 |
| -25139.68 | -2.77 | -25086.41 | 1.34 | -25031.22 | 7.37 | -24981.35 | 8.07  | -24926.92 | 13.35 | -24877.46 | 13.65 | -24851.23 | 15.30 |
| -25138.35 | -1.45 | -25085.50 | 2.25 | -25031.66 | 6.92 | -24976.99 | 12.44 | -24926.71 | 13.56 | -24879.24 | 11.87 | -24845.43 | 21.10 |
| -25139.52 | -2.62 | -25087.47 | 0.28 | -25033.20 | 5.39 | -24981.01 | 8.41  | -24926.96 | 13.30 | -24877.53 | 13.58 | -24850.68 | 15.85 |
| -25138.82 | -1.91 | -25087.15 | 0.59 | -25033.16 | 5.43 | -24981.71 | 7.71  | -24931.36 | 8.91  | -24874.68 | 16.43 | -24852.92 | 13.61 |
| -25138.84 | -1.94 | -25086.63 | 1.11 | -25034.94 | 3.65 | -24983.45 | 5.98  | -24927.14 | 13.13 | -24877.34 | 13.77 | -24848.39 | 18.14 |
| -25139.16 | -2.25 | -25086.54 | 1.20 | -25031.91 | 6.67 | -24980.59 | 8.84  | -24927.01 | 13.26 | -24877.57 | 13.54 | -24847.27 | 19.26 |
| -25138.93 | -2.02 | -25085.74 | 2.01 | -25032.66 | 5.93 | -24980.45 | 8.97  | -24922.10 | 18.17 | -24872.68 | 18.43 | -24851.16 | 15.37 |
| -25136.71 | 0.20  | -25086.32 | 1.43 | -25032.62 | 5.97 | -24974.93 | 14.50 | -24929.67 | 10.60 | -24873.85 | 17.26 | -24842.96 | 23.57 |
| -25138.69 | -1.79 | -25087.12 | 0.62 | -25032.08 | 6.51 | -24978.11 | 11.32 | -24926.66 | 13.61 | -24880.91 | 10.20 | -24849.68 | 16.85 |
| -25138.94 | -2.04 | -25085.38 | 2.37 | -25032.31 | 6.27 | -24981.71 | 7.71  | -24929.80 | 10.46 | -24879.21 | 11.90 | -24853.56 | 12.97 |
| -25138.17 | -1.27 | -25085.41 | 2.34 | -25034.60 | 3.98 | -24980.14 | 9.29  | -24931.46 | 8.81  | -24878.35 | 12.76 | -24843.93 | 22.60 |
| -25139.42 | -2.52 | -25084.94 | 2.81 | -25033.77 | 4.81 | -24978.39 | 11.04 | -24928.00 | 12.27 | -24879.28 | 11.82 | -24850.24 | 16.30 |
| -25137.74 | -0.84 | -25084.76 | 2.98 | -25029.52 | 9.07 | -24983.53 | 5.89  | -24929.79 | 10.48 | -24866.53 | 24.58 | -24849.88 | 16.65 |
| -25138.58 | -1.68 | -25087.39 | 0.35 | -25033.31 | 5.28 | -24980.41 | 9.02  | -24927.96 | 12.31 | -24870.82 | 20.29 | -24851.18 | 15.35 |
| -25139.29 | -2.38 | -25082.50 | 5.24 | -25032.31 | 6.28 | -24980.18 | 9.25  | -24926.30 | 13.97 | -24881.49 | 9.62  | -24855.81 | 10.72 |
| -25139.81 | -2.90 | -25085.06 | 2.68 | -25030.33 | 8.26 | -24982.30 | 7.13  | -24928.16 | 12.10 | -24873.60 | 17.51 | -24850.45 | 16.08 |
| -25138.74 | -1.83 | -25084.45 | 3.29 | -25028.96 | 9.62 | -24984.17 | 5.25  | -24927.09 | 13.18 | -24877.01 | 14.10 | -24851.46 | 15.07 |
| -25139.32 | -2.41 | -25085.80 | 1.94 | -25032.57 | 6.01 | -24976.82 | 12.61 | -24926.97 | 13.29 | -24849.77 | 41.34 | -24849.77 | 16.76 |



|           |       |           |       |           |       |           |        |           |       |           |       |           |       |
|-----------|-------|-----------|-------|-----------|-------|-----------|--------|-----------|-------|-----------|-------|-----------|-------|
| -25138.59 | -1.69 | -25083.58 | 4.17  | -25033.68 | 4.91  | -24978.63 | 10.79  | -24930.71 | 9.56  | -24879.70 | 11.41 | -24846.03 | 20.50 |
| -25137.60 | -0.70 | -25086.67 | 1.07  | -25035.44 | 3.14  | -24980.64 | 8.78   | -24928.97 | 11.30 | -24880.73 | 10.38 | -24851.61 | 14.92 |
| -25139.01 | -2.11 | -25083.80 | 3.94  | -25033.32 | 5.26  | -24978.56 | 10.86  | -24878.59 | 61.68 | -24876.32 | 14.79 | -24854.35 | 12.18 |
| -25137.95 | -1.05 | -25086.01 | 1.74  | -25031.49 | 7.10  | -24930.25 | 59.17  | -24929.39 | 10.88 | -24875.82 | 15.29 | -24848.82 | 17.71 |
| -25138.00 | -1.10 | -25084.06 | 3.68  | -25033.72 | 4.86  | -24979.10 | 10.33  | -24926.32 | 13.95 | -24876.52 | 14.59 | -24846.95 | 19.58 |
| -25139.19 | -2.29 | -25087.65 | 0.10  | -25033.18 | 5.41  | -24979.94 | 9.49   | -24923.22 | 17.04 | -24875.91 | 15.20 | -24846.35 | 20.18 |
| -25138.95 | -2.04 | -25084.36 | 3.38  | -25035.43 | 3.15  | -24982.70 | 6.73   | -24923.96 | 16.31 | -24877.95 | 13.16 | -24846.35 | 20.18 |
| -25137.75 | -0.85 | -25083.68 | 4.06  | -25033.40 | 5.18  | -24978.75 | 10.67  | -24927.97 | 12.30 | -24873.09 | 18.02 | -24852.60 | 13.93 |
| -25138.68 | -1.77 | -25083.41 | 4.34  | -25033.28 | 5.31  | -24981.00 | 8.43   | -24927.70 | 12.57 | -24875.24 | 15.87 | -24848.50 | 18.03 |
| -25138.73 | -1.83 | -25084.80 | 2.95  | -25033.71 | 4.88  | -24981.34 | 8.09   | -24924.26 | 16.01 | -24875.75 | 15.36 | -24851.42 | 15.11 |
| -25138.46 | -1.56 | -25087.74 | 0.00  | -25034.69 | 3.90  | -24981.81 | 7.62   | -24931.44 | 8.83  | -24879.11 | 11.99 | -24854.04 | 12.49 |
| -25137.85 | -0.95 | -25085.07 | 2.68  | -25034.60 | 3.98  | -24978.75 | 10.68  | -24927.11 | 13.16 | -24877.55 | 13.56 | -24848.83 | 17.70 |
| -25138.70 | -1.80 | -25086.79 | 0.95  | -25030.46 | 8.12  | -24981.72 | 7.71   | -24928.72 | 11.55 | -24876.43 | 14.68 | -24848.27 | 18.26 |
| -25139.07 | -2.17 | -25088.03 | -0.29 | -25032.28 | 6.30  | -24980.01 | 9.42   | -24925.23 | 15.04 | -24875.51 | 15.60 | -24848.97 | 17.56 |
| -25137.99 | -1.08 | -25088.11 | -0.37 | -25031.55 | 7.03  | -24983.74 | 5.69   | -24929.00 | 11.27 | -24879.09 | 12.02 | -24848.76 | 17.77 |
| -25136.64 | 0.26  | -25087.51 | 0.23  | -25033.29 | 5.29  | -24980.12 | 9.31   | -24924.56 | 15.70 | -24872.59 | 18.52 | -24849.74 | 16.79 |
| -25138.04 | -1.14 | -25085.80 | 1.94  | -25031.61 | 6.98  | -24981.18 | 8.25   | -24930.37 | 9.90  | -24874.10 | 17.01 | -24841.73 | 24.80 |
| -25138.97 | -2.07 | -25086.26 | 1.49  | -25035.22 | 3.37  | -24982.17 | 7.26   | -24931.81 | 8.46  | -24876.59 | 14.52 | -24845.10 | 21.43 |
| -25139.31 | -2.41 | -25086.90 | 0.85  | -25033.98 | 4.60  | -24982.54 | 6.89   | -24928.85 | 11.42 | -24876.48 | 14.63 | -24845.29 | 21.24 |
| -25137.84 | -0.94 | -25086.61 | 1.13  | -25033.11 | 5.48  | -25020.47 | -31.04 | -24927.98 | 12.29 | -24878.51 | 12.60 | -24846.61 | 19.92 |
| -25139.06 | -2.15 | -25085.62 | 2.13  | -25034.45 | 4.13  | -24982.52 | 6.90   | -24923.91 | 16.36 | -24879.46 | 11.65 | -24850.21 | 16.32 |
| -25137.61 | -0.71 | -25086.72 | 1.02  | -25029.69 | 8.90  | -24980.15 | 9.27   | -24923.90 | 16.37 | -24878.32 | 12.78 | -24848.00 | 18.53 |
| -25139.09 | -2.19 | -25086.28 | 1.47  | -25033.26 | 5.32  | -24980.44 | 8.99   | -24928.48 | 11.79 | -24876.25 | 14.86 | -24852.87 | 13.66 |
| -25139.96 | -3.06 | -25087.45 | 0.29  | -25029.91 | 8.67  | -24977.96 | 11.46  | -24930.27 | 10.00 | -24849.94 | 41.17 | -24845.97 | 20.56 |
| -25138.19 | -1.29 | -25085.68 | 2.07  | -24980.72 | 57.87 | -24981.73 | 7.70   | -24928.60 | 11.67 | -24877.76 | 13.35 | -24850.69 | 15.84 |
| -25139.41 | -2.50 | -25085.17 | 2.57  | -25034.26 | 4.33  | -24925.94 | 63.48  | -24929.60 | 10.67 | -24873.76 | 17.35 | -24847.35 | 19.18 |
| -25137.00 | -0.10 | -25087.44 | 0.31  | -25032.35 | 6.24  | -24979.93 | 9.49   | -24931.37 | 8.89  | -24876.63 | 14.48 | -24851.47 | 15.06 |
| -25138.94 | -2.04 | -25035.02 | 52.73 | -25032.60 | 5.98  | -24982.32 | 7.11   | -24877.23 | 63.04 | -24876.10 | 15.01 | -24849.12 | 17.41 |
| -25085.14 | 51.76 | -25085.63 | 2.12  | -24979.07 | 59.52 | -24981.63 | 7.80   | -24926.42 | 13.84 | -24874.81 | 16.30 | -24850.69 | 15.84 |
| -25139.39 | -2.48 | -25085.21 | 2.53  | -25033.61 | 4.97  | -24927.40 | 62.03  | -24931.50 | 8.76  | -24876.05 | 15.06 | -24845.34 | 21.19 |
| -25139.47 | -2.57 | -25087.81 | -0.07 | -25034.53 | 4.06  | -24978.46 | 10.97  | -24925.75 | 14.52 | -24874.64 | 16.46 | -24851.93 | 14.60 |
| -25138.38 | -1.47 | -25082.51 | 5.23  | -25032.28 | 6.31  | -24983.34 | 6.09   | -24875.87 | 64.40 | -24876.35 | 14.76 | -24851.71 | 14.82 |
| -25140.78 | -3.87 | -25085.63 | 2.11  | -25034.60 | 3.99  | -24978.39 | 11.04  | -24928.25 | 12.02 | -24879.33 | 11.78 | -24852.02 | 14.51 |
| -25137.74 | -0.84 | -25086.78 | 0.97  | -25033.77 | 4.82  | -24979.84 | 9.59   | -24929.05 | 11.21 | -24876.25 | 14.86 | -24851.98 | 14.55 |
| -25138.54 | -1.63 | -25085.75 | 2.00  | -25033.48 | 5.11  | -24979.83 | 9.60   | -24926.75 | 13.52 | -24876.91 | 14.20 | -24847.18 | 19.35 |
| -25138.19 | -1.29 | -25086.61 | 1.13  | -25033.18 | 5.40  | -24984.51 | 4.92   | -24928.29 | 11.98 | -24876.53 | 14.58 | -24852.93 | 13.60 |
| -25138.47 | -1.57 | -25083.17 | 4.57  | -25032.55 | 6.03  | -24978.32 | 11.10  | -24924.14 | 16.13 | -24875.95 | 15.16 | -24849.11 | 17.42 |
| -25138.76 | -1.85 | -25085.89 | 1.85  | -25033.40 | 5.19  | -24979.39 | 10.04  | -24926.80 | 13.47 | -24874.21 | 16.90 | -24847.58 | 18.95 |
| -25139.75 | -2.85 | -25084.50 | 3.25  | -25031.17 | 7.41  | -24977.64 | 11.79  | -24929.42 | 10.85 | -24875.30 | 15.81 | -24850.73 | 15.80 |
| -25138.03 | -1.12 | -25085.60 | 2.14  | -25032.51 | 6.07  | -24981.59 | 7.84   | -24931.49 | 8.78  | -24878.14 | 12.97 | -24853.18 | 13.35 |
| -25135.78 | 1.12  | -25084.33 | 3.42  | -25031.73 | 6.86  | -24979.30 | 10.13  | -24928.91 | 11.36 | -24879.11 | 12.00 | -24850.82 | 15.71 |

|                  |           |           |           |           |           |           |           |           |           |           |           |           |           |       |
|------------------|-----------|-----------|-----------|-----------|-----------|-----------|-----------|-----------|-----------|-----------|-----------|-----------|-----------|-------|
| -25138.41        | -1.51     | -25085.15 | 2.60      | -25028.75 | 9.83      | -24980.34 | 9.08      | -24930.36 | 9.91      | -24874.38 | 16.73     | -24851.45 | 15.08     |       |
| -25138.50        | -1.60     | -25085.72 | 2.02      | -25035.28 | 3.31      | -24981.02 | 8.40      | -24927.82 | 12.45     | -24873.86 | 17.25     | -24852.12 | 14.41     |       |
| -25138.64        | -1.74     | -25085.98 | 1.77      | -25033.38 | 5.21      | -24980.22 | 9.21      | -24931.69 | 8.58      | -24876.94 | 14.17     | -24849.20 | 17.33     |       |
| -25139.48        | -2.58     | -25081.19 | 6.55      | -25033.90 | 4.68      | -24975.96 | 13.46     | -24921.96 | 18.31     | -24876.13 | 14.98     | -24849.96 | 16.57     |       |
| -25138.96        | -2.06     | -25086.41 | 1.33      | -25034.91 | 3.68      | -24981.92 | 7.50      | -24924.07 | 16.20     | -24876.84 | 14.27     | -24854.41 | 12.12     |       |
| -25139.62        | -2.71     | -25086.54 | 1.20      | -25033.94 | 4.64      | -24980.67 | 8.76      | -24928.61 | 11.65     | -24875.13 | 15.98     | -24848.99 | 17.54     |       |
| -25138.43        | -1.52     | -25085.27 | 2.47      | -25035.26 | 3.32      | -24983.28 | 6.15      | -24930.13 | 10.14     | -24876.55 | 14.56     |           |           |       |
| -25138.77        | -1.86     | -25084.90 | 2.84      | -25033.41 | 5.18      | -24978.11 | 11.32     | -24927.44 | 12.83     | -24874.35 | 16.76     |           |           |       |
| -25138.48        | -1.58     | -25085.09 | 2.66      | -25031.67 | 6.91      | -24977.34 | 12.09     | -24966.93 | -26.66    |           |           |           |           |       |
| -25138.07        | -1.17     | -25086.91 | 0.83      | -25036.33 | 2.26      | -24984.12 | 5.31      | -24926.97 | 13.30     |           |           |           |           |       |
| -25137.25        | -0.35     | -25086.24 | 1.51      |           |           |           |           | -24928.34 | 11.92     |           |           |           |           |       |
| -25138.56        | -1.65     | -25085.93 | 1.81      |           |           |           |           | -24929.99 | 10.28     |           |           |           |           |       |
| -25138.80        | -1.90     | -25083.04 | 4.71      |           |           |           |           | -24928.15 | 12.12     |           |           |           |           |       |
| Average energies | -25138.11 | -1.21     | -25085.39 | 2.36      | -25032.05 | 6.53      | -24979.40 | 10.03     | -24926.83 | 13.44     | -24875.35 | 15.76     | -24850.03 | 16.50 |

# Th

concentration in solid solution (%)  
number of atoms

| ground state energy | solid solution energy |           |      |           |       |           |        |           |       |           |       |           |       |  |
|---------------------|-----------------------|-----------|------|-----------|-------|-----------|--------|-----------|-------|-----------|-------|-----------|-------|--|
|                     |                       | 3         | 6    | 9         | 12    | 15        | 18     | 21        |       |           |       |           |       |  |
|                     |                       | 2         | 4    | 6         | 8     | 10        | 12     | 13        |       |           |       |           |       |  |
| -25144.04           | -1.51                 | -25097.16 | 1.84 | -25049.54 | 5.94  | -25001.80 | 10.15  | -24954.93 | 13.49 | -24907.06 | 17.83 | -24882.63 | 20.50 |  |
| -25143.43           | -0.90                 | -25095.98 | 3.03 | -25049.95 | 5.53  | -25000.95 | 11.00  | -24955.00 | 13.42 | -24905.13 | 19.76 | -24880.65 | 22.48 |  |
| -25143.29           | -0.76                 | -25095.72 | 3.29 | -25049.95 | 5.53  | -25042.82 | -30.87 | -24952.00 | 16.42 | -24907.85 | 17.04 | -24879.13 | 24.00 |  |
| -25145.20           | -2.66                 | -25096.40 | 2.61 | -25050.79 | 4.69  | -25000.84 | 11.11  | -24952.00 | 16.42 | -24907.66 | 17.24 | -24880.05 | 23.08 |  |
| -25143.24           | -0.71                 | -25097.24 | 1.76 | -25046.76 | 8.72  | -25002.59 | 9.36   | -24954.28 | 14.14 | -24901.21 | 23.68 | -24877.86 | 25.27 |  |
| -25144.06           | -1.53                 | -25096.66 | 2.34 | -25049.62 | 5.86  | -25002.36 | 9.59   | -24953.47 | 14.95 | -24906.55 | 18.34 | -24886.64 | 16.49 |  |
| -25144.46           | -1.92                 | -25096.80 | 2.21 | -25049.18 | 6.30  | -25002.77 | 9.18   | -24953.54 | 14.89 | -24904.67 | 20.22 | -24883.91 | 19.22 |  |
| -25144.26           | -1.73                 | -25098.22 | 0.78 | -25049.96 | 5.52  | -25002.68 | 9.27   | -24954.95 | 13.47 | -24906.77 | 18.12 | -24881.21 | 21.92 |  |
| -25145.07           | -2.53                 | -25095.70 | 3.30 | -25048.12 | 7.36  | -25002.78 | 9.17   | -24955.34 | 13.08 | -24908.75 | 16.14 | -24884.34 | 18.79 |  |
| -25143.56           | -1.02                 | -25097.29 | 1.71 | -25049.05 | 6.43  | -25002.56 | 9.39   | -24953.38 | 15.04 | -24885.60 | 39.29 | -24877.22 | 25.91 |  |
| -25145.63           | -3.10                 | -25095.43 | 3.57 | -25048.99 | 6.48  | -25000.54 | 11.40  | -24952.30 | 16.12 | -24899.36 | 25.54 | -24884.24 | 18.88 |  |
| -25143.56           | -1.03                 | -25096.92 | 2.08 | -25047.68 | 7.80  | -25000.49 | 11.46  | -24947.78 | 20.64 | -24908.49 | 16.41 | -24884.15 | 18.98 |  |
| -25145.24           | -2.71                 | -25097.56 | 1.44 | -25048.15 | 7.33  | -25003.79 | 8.16   | -24949.48 | 18.94 | -24906.67 | 18.22 | -24878.22 | 24.91 |  |
| -25141.35           | 1.19                  | -25096.56 | 2.44 | -25044.16 | 11.31 | -24998.52 | 13.43  | -24955.59 | 12.83 | -24905.13 | 19.77 | -24882.35 | 20.78 |  |
| -25143.61           | -1.08                 | -25097.88 | 1.13 | -25048.43 | 7.05  | -25001.83 | 10.12  | -24955.21 | 13.21 | -24904.65 | 20.24 | -24883.93 | 19.20 |  |
| -25143.40           | -0.87                 | -25095.13 | 3.87 | -25047.61 | 7.86  | -24998.31 | 13.64  | -24955.74 | 12.68 | -24906.42 | 18.48 | -24886.18 | 16.95 |  |
| -25143.77           | -1.24                 | -25097.53 | 1.47 | -25051.39 | 4.08  | -25003.01 | 8.94   | -24958.12 | 10.30 | -24899.47 | 25.42 | -24880.30 | 22.83 |  |
| -25144.56           | -2.03                 | -25096.07 | 2.94 | -25049.02 | 6.45  | -25003.49 | 8.46   | -24950.32 | 18.10 | -24904.52 | 20.38 | -24885.73 | 17.40 |  |
| -25143.64           | -1.10                 | -25096.27 | 2.73 | -25050.20 | 5.27  | -24998.91 | 13.04  | -24953.72 | 14.70 | -24900.51 | 24.38 | -24883.79 | 19.34 |  |

|           |       |           |      |           |       |           |       |           |       |           |       |           |       |
|-----------|-------|-----------|------|-----------|-------|-----------|-------|-----------|-------|-----------|-------|-----------|-------|
| -25142.96 | -0.43 | -25097.92 | 1.09 | -25051.36 | 4.11  | -24999.57 | 12.37 | -24954.69 | 13.73 | -24902.83 | 22.06 | -24883.32 | 19.81 |
| -25144.22 | -1.69 | -25096.24 | 2.77 | -25049.73 | 5.75  | -25000.82 | 11.13 | -24954.57 | 13.85 | -24903.56 | 21.33 | -24885.05 | 18.08 |
| -25145.02 | -2.48 | -25094.86 | 4.15 | -25049.66 | 5.82  | -25001.76 | 10.18 | -24952.77 | 15.65 | -24908.72 | 16.18 | -24884.01 | 19.12 |
| -25145.12 | -2.59 | -25095.65 | 3.36 | -25049.80 | 5.67  | -24999.62 | 12.33 | -24911.17 | 57.25 | -24885.59 | 39.30 | -24885.95 | 17.18 |
| -25144.33 | -1.79 | -25098.40 | 0.60 | -25049.58 | 5.90  | -25002.59 | 9.36  | -24954.62 | 13.81 | -24907.80 | 17.09 | -24875.95 | 27.18 |
| -25145.03 | -2.50 | -25096.79 | 2.21 | -25051.22 | 4.26  | -25000.06 | 11.89 | -24951.38 | 17.04 | -24900.83 | 24.06 | -24883.49 | 19.64 |
| -25144.72 | -2.19 | -25094.43 | 4.58 | -25050.53 | 4.94  | -25000.17 | 11.78 | -24955.43 | 12.99 | -24905.99 | 18.90 | -24884.03 | 19.10 |
| -25144.79 | -2.25 | -25098.22 | 0.79 | -25050.35 | 5.13  | -25000.42 | 11.53 | -24953.94 | 14.48 | -24907.34 | 17.56 | -24881.63 | 21.50 |
| -25144.29 | -1.76 | -25096.49 | 2.52 | -25050.48 | 5.00  | -25001.20 | 10.74 | -24955.38 | 13.04 | -24897.86 | 27.03 | -24885.53 | 17.60 |
| -25143.83 | -1.30 | -25098.67 | 0.33 | -25048.74 | 6.74  | -25000.10 | 11.84 | -24953.59 | 14.83 | -24904.19 | 20.70 | -24885.34 | 17.78 |
| -25143.91 | -1.37 | -25096.85 | 2.15 | -25045.78 | 9.70  | -24996.54 | 15.41 | -24947.64 | 20.78 | -24909.84 | 15.05 | -24881.73 | 21.40 |
| -25144.30 | -1.77 | -25098.68 | 0.33 | -25050.05 | 5.42  | -25001.01 | 10.94 | -24954.15 | 14.27 | -24904.33 | 20.56 | -24880.13 | 23.00 |
| -25142.51 | 0.03  | -25097.74 | 1.26 | -25049.03 | 6.45  | -25004.50 | 7.45  | -24957.36 | 11.06 | -24907.38 | 17.51 | -24885.14 | 17.98 |
| -25144.51 | -1.97 | -25097.54 | 1.46 | -25048.51 | 6.97  | -24999.72 | 12.23 | -24954.57 | 13.85 | -24907.59 | 17.30 | -24881.01 | 22.12 |
| -25145.14 | -2.61 | -25097.30 | 1.70 | -25050.43 | 5.04  | -25001.74 | 10.21 | -24956.92 | 11.50 | -24905.53 | 19.36 | -24879.28 | 23.85 |
| -25144.01 | -1.48 | -25098.50 | 0.51 | -25049.54 | 5.94  | -24998.34 | 13.61 | -24955.73 | 12.69 | -24910.11 | 14.78 | -24885.70 | 17.43 |
| -25144.04 | -1.51 | -25092.55 | 6.45 | -25049.73 | 5.75  | -25003.29 | 8.66  | -24955.39 | 13.03 | -24907.70 | 17.19 | -24881.80 | 21.33 |
| -25144.22 | -1.69 | -25096.31 | 2.70 | -25048.59 | 6.89  | -25000.72 | 11.22 | -24955.30 | 13.13 | -24906.46 | 18.43 | -24882.29 | 20.84 |
| -25144.38 | -1.84 | -25097.34 | 1.67 | -25046.80 | 8.68  | -24999.71 | 12.24 | -24956.26 | 12.16 | -24905.04 | 19.85 | -24882.80 | 20.33 |
| -25143.88 | -1.35 | -25096.15 | 2.85 | -25047.97 | 7.50  | -25001.27 | 10.68 | -24952.88 | 15.54 | -24907.44 | 17.45 | -24882.14 | 20.99 |
| -25144.00 | -1.46 | -25096.85 | 2.15 | -25047.22 | 8.26  | -25000.24 | 11.71 | -24952.86 | 15.56 | -24905.28 | 19.61 | -24880.39 | 22.74 |
| -25143.94 | -1.41 | -25096.77 | 2.24 | -25050.81 | 4.66  | -25002.26 | 9.69  | -24957.82 | 10.60 | -24902.68 | 22.21 | -24883.26 | 19.87 |
| -25143.78 | -1.24 | -25096.94 | 2.06 | -25048.97 | 6.50  | -25003.51 | 8.44  | -24950.59 | 17.83 | -24902.62 | 22.27 | -24881.34 | 21.79 |
| -25144.06 | -1.52 | -25096.82 | 2.18 | -25049.33 | 6.15  | -25002.78 | 9.17  | -24957.65 | 10.77 | -24906.56 | 18.33 | -24872.14 | 30.99 |
| -25144.42 | -1.88 | -25095.26 | 3.74 | -25047.74 | 7.74  | -25000.12 | 11.83 | -24955.63 | 12.79 | -24883.45 | 41.44 | -24881.81 | 21.32 |
| -25144.06 | -1.53 | -25096.48 | 2.53 | -25044.96 | 10.52 | -24953.74 | 58.21 | -24955.86 | 12.56 | -24906.16 | 18.73 | -24879.72 | 23.40 |
| -25144.10 | -1.56 | -25097.79 | 1.21 | -25048.05 | 7.43  | -24998.76 | 13.19 | -24902.76 | 65.66 | -24902.47 | 22.42 | -24876.14 | 26.99 |
| -25145.30 | -2.77 | -25093.63 | 5.38 | -25049.43 | 6.05  | -24999.74 | 12.21 | -24950.84 | 17.58 | -24908.68 | 16.21 | -24884.24 | 18.88 |
| -25143.83 | -1.29 | -25095.07 | 3.93 | -25049.63 | 5.84  | -24997.66 | 14.29 | -24952.95 | 15.47 | -24905.55 | 19.34 | -24886.26 | 16.87 |
| -25143.92 | -1.39 | -25094.82 | 4.18 | -25051.13 | 4.35  | -25002.40 | 9.55  | -24953.20 | 15.22 | -24906.72 | 18.17 | -24882.22 | 20.91 |
| -25143.31 | -0.78 | -25096.24 | 2.76 | -25047.77 | 7.71  | -25002.31 | 9.63  | -24954.19 | 14.23 | -24904.76 | 20.14 | -24884.35 | 18.78 |
| -25144.83 | -2.30 | -25097.10 | 1.90 | -25048.98 | 6.50  | -25004.93 | 7.02  | -24954.55 | 13.87 | -24906.86 | 18.03 | -24885.21 | 17.92 |
| -25143.91 | -1.38 | -25094.88 | 4.13 | -25048.34 | 7.14  | -25000.34 | 11.61 | -24954.19 | 14.23 | -24907.74 | 17.15 | -24883.70 | 19.43 |
| -25144.38 | -1.84 | -25094.93 | 4.08 | -25051.21 | 4.27  | -25003.19 | 8.76  | -24955.12 | 13.30 | -24902.68 | 22.21 | -24885.11 | 18.01 |
| -25141.06 | 1.47  | -25098.12 | 0.88 | -25049.74 | 5.74  | -25002.80 | 9.15  | -24957.13 | 11.29 | -24909.73 | 15.16 | -24883.28 | 19.85 |
| -25144.33 | -1.80 | -25096.72 | 2.29 | -25046.98 | 8.49  | -24999.09 | 12.86 | -24956.41 | 12.01 | -24901.64 | 23.25 | -24882.51 | 20.62 |
| -25143.62 | -1.09 | -25096.07 | 2.94 | -25048.71 | 6.77  | -25001.33 | 10.62 | -24955.32 | 13.10 | -24906.70 | 18.19 | -24883.99 | 19.14 |
| -25144.60 | -2.07 | -25096.89 | 2.11 | -25049.09 | 6.39  | -25002.39 | 9.56  | -24952.16 | 16.26 | -24906.60 | 18.29 | -24879.66 | 23.46 |
| -25143.26 | -0.72 | -25097.02 | 1.99 | -25051.29 | 4.18  | -24999.18 | 12.77 | -24956.24 | 12.18 | -24906.14 | 18.75 | -24884.44 | 18.69 |
| -25143.29 | -0.75 | -25098.31 | 0.69 | -25049.27 | 6.21  | -25002.07 | 9.88  | -24953.83 | 14.59 | -24897.57 | 27.32 | -24880.42 | 22.71 |
| -25143.41 | -0.87 | -25097.43 | 1.58 | -25049.06 | 6.42  | -25003.36 | 8.59  | -24947.66 | 20.76 | -24905.22 | 19.67 | -24886.66 | 16.47 |

|           |       |           |      |           |       |           |       |           |       |           |       |           |       |
|-----------|-------|-----------|------|-----------|-------|-----------|-------|-----------|-------|-----------|-------|-----------|-------|
| -25143.88 | -1.34 | -25093.01 | 5.99 | -25048.11 | 7.37  | -25001.22 | 10.73 | -24954.47 | 13.95 | -24908.89 | 16.00 | -24885.81 | 17.31 |
| -25144.00 | -1.47 | -25097.18 | 1.82 | -25050.23 | 5.25  | -24996.53 | 15.42 | -24951.48 | 16.94 | -24909.09 | 15.80 | -24879.64 | 23.48 |
| -25146.12 | -3.59 | -25098.10 | 0.91 | -25048.76 | 6.72  | -24999.45 | 12.50 | -24956.95 | 11.47 | -24908.47 | 16.43 | -24879.85 | 23.28 |
| -25144.77 | -2.23 | -25094.84 | 4.16 | -25049.57 | 5.91  | -25000.77 | 11.18 | -24953.24 | 15.18 | -24906.47 | 18.42 | -24884.31 | 18.82 |
| -25144.64 | -2.11 | -25098.09 | 0.91 | -25049.24 | 6.23  | -25002.45 | 9.50  | -24951.62 | 16.80 | -24906.37 | 18.52 | -24883.37 | 19.76 |
| -25144.61 | -2.07 | -25096.37 | 2.64 | -25048.16 | 7.31  | -25000.28 | 11.67 | -24954.02 | 14.40 | -24903.28 | 21.61 | -24880.63 | 22.50 |
| -25143.47 | -0.93 | -25097.05 | 1.95 | -25049.72 | 5.76  | -24995.88 | 16.07 | -24951.51 | 16.91 | -24907.87 | 17.02 | -24881.57 | 21.56 |
| -25144.50 | -1.97 | -25097.38 | 1.63 | -25051.01 | 4.47  | -25002.04 | 9.91  | -24955.88 | 12.54 | -24901.30 | 23.59 | -24885.38 | 17.75 |
| -25143.62 | -1.09 | -25097.18 | 1.82 | -25048.86 | 6.61  | -24999.66 | 12.29 | -24947.82 | 20.60 | -24906.87 | 18.03 | -24883.21 | 19.92 |
| -25144.74 | -2.21 | -25096.40 | 2.61 | -25048.61 | 6.87  | -25000.63 | 11.32 | -24956.22 | 12.20 | -24903.48 | 21.42 | -24880.07 | 23.06 |
| -25144.03 | -1.50 | -25096.95 | 2.05 | -25051.32 | 4.15  | -24996.59 | 15.36 | -24952.80 | 15.62 | -24904.73 | 20.16 | -24883.14 | 19.98 |
| -25144.22 | -1.69 | -25097.97 | 1.03 | -25047.70 | 7.78  | -25002.54 | 9.41  | -24952.49 | 15.93 | -24906.62 | 18.27 | -24881.99 | 21.14 |
| -25144.49 | -1.96 | -25096.30 | 2.71 | -25048.69 | 6.79  | -24997.77 | 14.18 | -24955.61 | 12.81 | -24906.33 | 18.56 | -24883.42 | 19.71 |
| -25143.08 | -0.55 | -25096.28 | 2.73 | -25051.01 | 4.47  | -25004.31 | 7.64  | -24951.95 | 16.47 | -24904.86 | 20.03 | -24883.82 | 19.31 |
| -25144.86 | -2.33 | -25095.42 | 3.59 | -25049.11 | 6.36  | -25001.88 | 10.07 | -24955.43 | 12.99 | -24909.74 | 15.15 | -24886.16 | 16.97 |
| -25144.87 | -2.34 | -25096.24 | 2.77 | -25043.36 | 12.12 | -25000.24 | 11.70 | -24953.07 | 15.35 | -24906.88 | 18.01 | -24876.60 | 26.52 |
| -25144.90 | -2.37 | -25096.01 | 2.99 | -25049.60 | 5.88  | -24999.70 | 12.25 | -24951.73 | 16.69 | -24903.56 | 21.33 | -24883.42 | 19.70 |
| -25145.17 | -2.64 | -25096.46 | 2.55 | -25051.93 | 3.55  | -25002.91 | 9.04  | -24951.44 | 16.98 | -24907.02 | 17.88 | -24875.94 | 27.19 |
| -25143.27 | -0.73 | -25096.64 | 2.36 | -25046.53 | 8.95  | -25003.56 | 8.39  | -24953.02 | 15.40 | -24908.17 | 16.72 | -24869.17 | 33.96 |
| -25143.68 | -1.14 | -25096.75 | 2.25 | -25051.86 | 3.62  | -25000.34 | 11.61 | -24953.83 | 14.59 | -24906.58 | 18.31 | -24883.40 | 19.73 |
| -25143.02 | -0.49 | -25095.82 | 3.19 | -25050.96 | 4.52  | -25005.24 | 6.71  | -24953.59 | 14.83 | -24908.82 | 16.07 | -24886.24 | 16.89 |
| -25143.10 | -0.57 | -25097.05 | 1.95 | -25049.44 | 6.04  | -24998.16 | 13.79 | -24949.84 | 18.58 | -24901.85 | 23.05 | -24881.00 | 22.13 |
| -25143.34 | -0.80 | -25095.12 | 3.89 | -25047.58 | 7.90  | -24999.23 | 12.72 | -24953.04 | 15.38 | -24909.29 | 15.60 | -24879.36 | 23.76 |
| -25143.76 | -1.23 | -25097.83 | 1.18 | -25050.47 | 5.01  | -24997.59 | 14.36 | -24954.90 | 13.52 | -24908.86 | 16.04 | -24882.31 | 20.82 |
| -25144.90 | -2.37 | -25096.49 | 2.52 | -25045.54 | 9.93  | -25002.79 | 9.16  | -24951.09 | 17.33 | -24906.34 | 18.55 | -24879.44 | 23.69 |
| -25144.96 | -2.43 | -25095.98 | 3.03 | -25048.67 | 6.81  | -25003.24 | 8.71  | -24955.29 | 13.13 | -24907.68 | 17.21 | -24882.99 | 20.13 |
| -25143.38 | -0.84 | -25097.93 | 1.08 | -25049.81 | 5.67  | -25001.40 | 10.55 | -24955.14 | 13.28 | -24909.06 | 15.83 | -24877.27 | 25.86 |
| -25144.15 | -1.62 | -25094.05 | 4.95 | -25048.65 | 6.82  | -25001.53 | 10.42 | -24954.23 | 14.19 | -24908.35 | 16.54 | -24886.38 | 16.75 |
| -25144.95 | -2.42 | -25093.34 | 5.66 | -25049.33 | 6.15  | -25003.99 | 7.96  | -24956.83 | 11.59 | -24908.48 | 16.41 | -24883.74 | 19.39 |
| -25143.57 | -1.04 | -25096.70 | 2.30 | -25047.19 | 8.28  | -25000.28 | 11.67 | -24954.92 | 13.50 | -24901.88 | 23.01 | -24879.30 | 23.83 |
| -25143.46 | -0.92 | -25096.50 | 2.51 | -25047.77 | 7.71  | -25002.52 | 9.43  | -24951.16 | 17.26 | -24905.03 | 19.86 | -24874.86 | 28.27 |
| -25143.68 | -1.15 | -25096.84 | 2.17 | -25048.78 | 6.70  | -25000.38 | 11.56 | -24952.48 | 15.94 | -24876.69 | 48.21 | -24882.43 | 20.69 |
| -25142.86 | -0.33 | -25095.03 | 3.98 | -25050.32 | 5.16  | -25000.63 | 11.32 | -24956.26 | 12.16 | -24907.69 | 17.20 | -24884.73 | 18.39 |
| -25144.07 | -1.53 | -25096.39 | 2.62 | -25049.69 | 5.79  | -25001.28 | 10.67 | -24956.20 | 12.23 | -24904.15 | 20.74 | -24881.47 | 21.66 |
| -25144.39 | -1.85 | -25094.73 | 4.28 | -25050.22 | 5.26  | -24998.21 | 13.74 | -24953.71 | 14.71 | -24907.50 | 17.39 | -24882.92 | 20.21 |
| -25144.90 | -2.37 | -25097.99 | 1.02 | -25048.67 | 6.80  | -24996.60 | 15.35 | -24955.40 | 13.02 | -24906.67 | 18.23 | -24878.06 | 25.07 |
| -25143.98 | -1.45 | -25097.99 | 1.01 | -25049.98 | 5.49  | -25001.25 | 10.69 | -24956.46 | 11.96 | -24906.24 | 18.65 | -24883.38 | 19.74 |
| -25144.53 | -2.00 | -25097.85 | 1.16 | -25049.91 | 5.56  | -25003.07 | 8.88  | -24948.48 | 19.94 | -24903.56 | 21.33 | -24882.51 | 20.62 |
| -25143.83 | -1.29 | -25098.45 | 0.55 | -25048.89 | 6.58  | -24999.43 | 12.52 | -24951.29 | 17.13 | -24905.87 | 19.03 | -24880.65 | 22.48 |
| -25144.40 | -1.87 | -25095.60 | 3.41 | -25049.28 | 6.19  | -25002.29 | 9.66  | -24954.35 | 14.07 | -24903.91 | 20.99 | -24878.45 | 24.68 |
| -25144.18 | -1.64 | -25095.74 | 3.27 | -25049.36 | 6.12  | -25003.34 | 8.61  | -24954.06 | 14.36 | -24904.75 | 20.14 | -24882.00 | 21.12 |

|                  |           |           |           |           |           |           |           |           |           |           |           |           |           |       |
|------------------|-----------|-----------|-----------|-----------|-----------|-----------|-----------|-----------|-----------|-----------|-----------|-----------|-----------|-------|
| -25143.98        | -1.44     | -25096.04 | 2.96      | -25049.14 | 6.34      | -25003.33 | 8.62      | -24954.11 | 14.31     | -24908.79 | 16.10     | -24878.72 | 24.41     |       |
| -25143.60        | -1.07     | -25096.91 | 2.10      | -25048.84 | 6.64      | -25003.05 | 8.90      | -24954.72 | 13.70     | -24906.41 | 18.48     | -24878.55 | 24.58     |       |
| -25144.58        | -2.05     | -25098.27 | 0.73      | -25050.04 | 5.44      | -25002.51 | 9.44      | -24952.20 | 16.22     | -24908.58 | 16.32     | -24887.94 | 15.19     |       |
| -25144.06        | -1.52     | -25095.54 | 3.46      | -25087.96 | -32.48    | -25002.24 | 9.71      | -24956.75 | 11.67     | -24905.97 | 18.92     |           |           |       |
| -25144.50        | -1.97     | -25097.43 | 1.57      | -25048.71 | 6.77      | -25001.27 | 10.68     | -24957.46 | 10.96     | -24908.68 | 16.22     |           |           |       |
| -25144.80        | -2.27     | -25096.77 | 2.23      | -25048.51 | 6.97      | -25000.61 | 11.34     | -24951.31 | 17.11     | -24906.21 | 18.68     |           |           |       |
| -25143.57        | -1.04     | -25095.64 | 3.37      | -25049.47 | 6.01      | -25002.41 | 9.54      | -24950.33 | 18.09     | -24907.38 | 17.51     |           |           |       |
| -25144.18        | -1.65     | -25094.73 | 4.28      | -25048.10 | 7.38      | -25002.56 | 9.39      | -24954.89 | 13.53     | -24907.99 | 16.90     |           |           |       |
| -25144.33        | -1.80     | -25097.45 | 1.55      | -25047.60 | 7.87      | -24998.93 | 13.02     | -24952.93 | 15.49     | -24906.14 | 18.75     |           |           |       |
| -25143.21        | -0.68     | -25095.66 | 3.35      | -25047.37 | 8.10      | -25000.01 | 11.94     | -24952.85 | 15.58     | -24908.81 | 16.09     |           |           |       |
| -25143.50        | -0.96     | -25096.57 | 2.43      | -25049.33 | 6.15      | -24997.63 | 14.32     | -24953.58 | 14.84     | -24907.13 | 17.76     |           |           |       |
| -25143.78        | -1.25     | -25097.35 | 1.66      | -25045.93 | 9.55      | -25000.42 | 11.52     | -24952.89 | 15.53     | -24908.38 | 16.51     |           |           |       |
| -25144.64        | -2.11     | -25097.74 | 1.26      | -25048.52 | 6.96      | -25002.54 | 9.41      | -24954.49 | 13.93     | -24908.49 | 16.41     |           |           |       |
| -25142.88        | -0.34     | -25096.63 | 2.38      | -25048.04 | 7.44      | -24998.12 | 13.82     | -24954.39 | 14.03     | -24907.94 | 16.95     |           |           |       |
| -25144.46        | -1.92     |           |           | -25051.10 | 4.38      | -25000.57 | 11.38     | -24956.45 | 11.97     |           |           |           |           |       |
| -25144.10        | -1.57     |           |           | -25045.43 | 10.05     | -25002.57 | 9.38      | -24954.70 | 13.73     |           |           |           |           |       |
| -25144.51        | -1.97     |           |           | -25048.97 | 6.51      | -24999.93 | 12.02     | -24950.68 | 17.74     |           |           |           |           |       |
| -25146.16        | -3.63     |           |           |           |           |           |           | -24956.32 | 12.10     |           |           |           |           |       |
| Average energies | -25144.09 | -1.56     | -25096.56 | 2.45      | -25049.33 | 6.15      | -25000.99 | 10.96     | -24953.04 | 15.38     | -24905.17 | 19.72     | -24882.03 | 21.10 |

## U

concentration in solid solution (%)  
number of atoms

|           | ground state energy | solid solution energy |      |           |      |           |       |           |       |           |       |           |       |  |
|-----------|---------------------|-----------------------|------|-----------|------|-----------|-------|-----------|-------|-----------|-------|-----------|-------|--|
|           | 3                   | 6                     |      | 9         |      | 12        |       | 15        |       | 18        |       | 21        |       |  |
|           | 2                   | 4                     |      | 6         |      | 8         |       | 10        |       | 12        |       | 13        |       |  |
| -25146.74 | 0.81                | -25107.14             | 1.90 | -25063.49 | 7.04 | -25021.55 | 10.47 | -24971.24 | 22.28 | -24941.23 | 13.77 | -24912.96 | 22.79 |  |
| -25148.53 | -0.98               | -25103.81             | 5.23 | -25062.35 | 8.18 | -25021.44 | 10.58 | -24978.03 | 15.49 | -24935.22 | 19.78 | -24908.04 | 27.71 |  |
| -25147.43 | 0.13                | -25107.73             | 1.31 | -25062.38 | 8.15 | -25021.21 | 10.82 | -24981.62 | 11.90 | -24931.25 | 23.76 | -24913.55 | 22.20 |  |
| -25149.52 | -1.96               | -25105.86             | 3.18 | -25066.22 | 4.31 | -25021.16 | 10.87 | -24975.62 | 17.89 | -24935.35 | 19.65 | -24917.59 | 18.16 |  |
| -25149.44 | -1.89               | -25105.68             | 3.36 | -25063.81 | 6.73 | -25020.33 | 11.70 | -24981.50 | 12.01 | -24936.81 | 18.20 | -24910.10 | 25.65 |  |
| -25147.35 | 0.20                | -25101.73             | 7.31 | -25062.10 | 8.43 | -25023.08 | 8.94  | -24982.66 | 10.85 | -24933.85 | 21.15 | -24915.32 | 20.43 |  |
| -25146.71 | 0.84                | -25106.55             | 2.49 | -25063.29 | 7.24 | -25021.93 | 10.09 | -24975.64 | 17.87 | -24939.38 | 15.63 | -24909.10 | 26.65 |  |
| -25147.06 | 0.49                | -25106.99             | 2.05 | -25063.05 | 7.49 | -25023.95 | 8.08  | -24981.78 | 11.74 | -24938.59 | 16.42 | -24906.15 | 29.60 |  |
| -25148.40 | -0.84               | -25104.49             | 4.55 | -25062.75 | 7.79 | -25018.40 | 13.62 | -24977.29 | 16.22 | -24936.04 | 18.97 | -24915.07 | 20.68 |  |
| -25146.92 | 0.64                | -25103.66             | 5.38 | -25062.97 | 7.56 | -25022.10 | 9.92  | -24976.46 | 17.05 | -24938.30 | 16.71 | -24917.62 | 18.13 |  |
| -25148.94 | -1.39               | -25103.24             | 5.80 | -25062.93 | 7.61 | -25022.31 | 9.72  | -24974.55 | 18.96 | -24938.63 | 16.38 | -24917.49 | 18.26 |  |
| -25148.88 | -1.32               | -25103.44             | 5.61 | -25064.70 | 5.83 | -25021.86 | 10.17 | -24979.41 | 14.10 | -24939.74 | 15.27 | -24912.64 | 23.11 |  |
| -25150.38 | -2.83               | -25107.04             | 2.00 | -25064.47 | 6.07 | -25019.00 | 13.02 | -24975.94 | 17.58 | -24933.91 | 21.10 | -24916.10 | 19.65 |  |
| -25146.21 | 1.34                | -25108.76             | 0.28 | -25064.59 | 5.94 | -25020.38 | 11.64 | -24978.04 | 15.48 | -24940.11 | 14.89 | -24916.30 | 19.45 |  |

|           |       |           |       |           |        |           |       |           |       |           |        |           |       |
|-----------|-------|-----------|-------|-----------|--------|-----------|-------|-----------|-------|-----------|--------|-----------|-------|
| -25148.18 | -0.62 | -25104.76 | 4.28  | -25065.63 | 4.90   | -25021.12 | 10.91 | -24977.55 | 15.97 | -24937.67 | 17.33  | -24912.52 | 23.23 |
| -25147.19 | 0.37  | -25104.80 | 4.24  | -25065.17 | 5.37   | -25019.97 | 12.06 | -24978.55 | 14.97 | -24932.64 | 22.37  | -24907.27 | 28.48 |
| -25149.03 | -1.47 | -25106.88 | 2.16  | -25063.71 | 6.82   | -25020.46 | 11.57 | -24978.91 | 14.61 | -24939.00 | 16.00  | -24919.44 | 16.31 |
| -25143.32 | 4.23  | -25105.79 | 3.25  | -25066.56 | 3.98   | -25021.85 | 10.18 | -24980.23 | 13.28 | -24935.45 | 19.55  | -24917.29 | 18.46 |
| -25148.77 | -1.22 | -25105.33 | 3.72  | -25064.85 | 5.68   | -25020.60 | 11.42 | -24978.31 | 15.20 | -24936.12 | 18.88  | -24916.85 | 18.90 |
| -25149.76 | -2.21 | -25105.22 | 3.82  | -25063.84 | 6.70   | -25020.72 | 11.30 | -24978.15 | 15.37 | -24939.54 | 15.46  | -24916.82 | 18.93 |
| -25148.87 | -1.31 | -25105.06 | 3.99  | -25063.96 | 6.58   | -25020.20 | 11.83 | -24978.61 | 14.90 | -24935.87 | 19.13  | -24916.13 | 19.62 |
| -25147.51 | 0.04  | -25103.70 | 5.34  | -25062.18 | 8.35   | -25023.49 | 8.53  | -24978.31 | 15.21 | -24934.94 | 20.06  | -24914.47 | 21.28 |
| -25141.47 | 6.08  | -25106.61 | 2.43  | -25062.82 | 7.72   | -25020.85 | 11.18 | -24976.34 | 17.18 | -24937.73 | 17.27  | -24914.63 | 21.12 |
| -25148.73 | -1.17 | -25104.55 | 4.50  | -25063.48 | 7.05   | -25020.07 | 11.96 | -24979.02 | 14.49 | -24934.83 | 20.17  | -24912.05 | 23.69 |
| -25149.00 | -1.44 | -25095.03 | 14.02 | -25063.71 | 6.83   | -25019.11 | 12.92 | -24979.39 | 14.13 | -24940.53 | 14.47  | -24916.97 | 18.78 |
| -25149.65 | -2.10 | -25106.61 | 2.43  | -25063.16 | 7.37   | -25020.59 | 11.43 | -24980.02 | 13.49 | -24939.17 | 15.84  | -24916.01 | 19.74 |
| -25148.61 | -1.06 | -25098.26 | 10.78 | -25063.83 | 6.71   | -25021.60 | 10.43 | -24971.20 | 22.32 | -24938.82 | 16.18  | -24913.03 | 22.72 |
| -25148.32 | -0.77 | -25105.41 | 3.63  | -25063.89 | 6.64   | -25021.27 | 10.75 | -24978.32 | 15.19 | -24934.97 | 20.03  | -24912.74 | 23.01 |
| -25149.41 | -1.86 | -25106.24 | 2.80  | -25063.11 | 7.42   | -25018.55 | 13.47 | -24979.50 | 14.01 | -24939.07 | 15.93  | -24918.19 | 17.56 |
| -25149.85 | -2.29 | -25105.43 | 3.61  | -25065.47 | 5.06   | -25020.49 | 11.53 | -24981.54 | 11.98 | -24936.06 | 18.94  | -24914.88 | 20.87 |
| -25148.29 | -0.73 | -25104.03 | 5.01  | -25062.20 | 8.33   | -25007.52 | 24.50 | -24977.87 | 15.65 | -24937.30 | 17.71  | -24910.40 | 25.35 |
| -25147.41 | 0.15  | -25103.37 | 5.67  | -25062.02 | 8.51   | -25018.99 | 13.03 | -24979.92 | 13.60 | -24931.48 | 23.53  | -24916.20 | 19.55 |
| -25146.86 | 0.69  | -25106.19 | 2.85  | -25063.64 | 6.89   | -25021.68 | 10.34 | -24978.30 | 15.21 | -24938.00 | 17.01  | -24918.97 | 16.78 |
| -25147.93 | -0.37 | -25107.85 | 1.19  | -25064.59 | 5.94   | -25024.32 | 7.71  | -24978.91 | 14.61 | -24933.56 | 21.45  | -24915.31 | 20.44 |
| -25146.56 | 0.99  | -25105.81 | 3.24  | -25061.06 | 9.48   | -25018.80 | 13.23 | -24975.80 | 17.71 | -24935.95 | 19.05  | -24918.43 | 17.32 |
| -25148.21 | -0.66 | -25105.47 | 3.57  | -25065.32 | 5.22   | -25023.96 | 8.06  | -24981.19 | 12.33 | -24938.06 | 16.94  | -24912.70 | 23.05 |
| -25148.53 | -0.98 | -25102.51 | 6.53  | -25062.22 | 8.32   | -25022.45 | 9.57  | -24977.87 | 15.64 | -24932.33 | 22.68  | -24910.00 | 25.75 |
| -25149.02 | -1.47 | -25104.52 | 4.52  | -25066.57 | 3.97   | -25014.96 | 17.07 | -24979.57 | 13.94 | -24938.31 | 16.70  | -24912.58 | 23.17 |
| -25149.49 | -1.94 | -25105.12 | 3.93  | -25064.63 | 5.91   | -25023.76 | 8.26  | -24975.73 | 17.79 | -24929.96 | 25.04  | -24913.88 | 21.87 |
| -25139.55 | 8.00  | -25104.73 | 4.31  | -25063.65 | 6.88   | -25022.12 | 9.91  | -24977.91 | 15.60 | -24992.98 | -37.98 | -24917.55 | 18.20 |
| -25150.66 | -3.11 | -25105.90 | 3.14  | -25063.79 | 6.75   | -25023.43 | 8.59  | -24980.05 | 13.47 | -24938.81 | 16.19  | -24917.86 | 17.89 |
| -25148.61 | -1.06 | -25103.39 | 5.65  | -25065.06 | 5.47   | -25020.14 | 11.89 | -24976.94 | 16.58 | -24933.39 | 21.61  | -24917.21 | 18.54 |
| -25147.73 | -0.18 | -25105.74 | 3.31  | -25066.48 | 4.05   | -25023.65 | 8.38  | -24975.13 | 18.39 | -24938.65 | 16.36  | -24919.29 | 16.45 |
| -25147.92 | -0.37 | -25104.81 | 4.24  | -25060.93 | 9.60   | -25021.16 | 10.86 | -24977.28 | 16.24 | -24937.41 | 17.60  | -24914.38 | 21.37 |
| -25146.29 | 1.26  | -25104.92 | 4.13  | -25065.28 | 5.25   | -25015.43 | 16.60 | -24975.90 | 17.61 | -24934.44 | 20.56  | -24914.23 | 21.52 |
| -25148.50 | -0.94 | -25105.29 | 3.75  | -25065.64 | 4.89   | -25023.67 | 8.35  | -24980.28 | 13.23 | -24937.54 | 17.46  | -24919.33 | 16.42 |
| -25147.68 | -0.13 | -25106.60 | 2.45  | -25063.59 | 6.94   | -25022.11 | 9.91  | -24974.40 | 19.11 | -24939.46 | 15.54  | -24916.02 | 19.73 |
| -25148.62 | -1.07 | -25106.50 | 2.55  | -25060.07 | 10.46  | -25021.80 | 10.22 | -24971.26 | 22.25 | -24939.72 | 15.28  | -24914.47 | 21.28 |
| -25147.48 | 0.08  | -25106.54 | 2.51  | -25094.47 | -23.94 | -25021.96 | 10.06 |           |       | -24937.48 | 17.53  | -24912.04 | 23.71 |
| -25148.08 | -0.53 | -25105.43 | 3.61  | -25063.31 | 7.22   |           |       |           |       | -24934.35 | 20.65  | -24916.04 | 19.71 |
| -25148.61 | -1.06 | -25105.05 | 3.99  | -25064.11 | 6.42   |           |       |           |       | -24935.82 | 19.19  | -24919.25 | 16.50 |
| -25149.15 | -1.59 | -25105.66 | 3.39  | -25063.71 | 6.83   |           |       |           |       | -24935.39 | 19.61  | -24909.90 | 25.85 |
| -25147.49 | 0.06  | -25106.05 | 2.99  | -25063.60 | 6.94   |           |       |           |       | -24938.77 | 16.23  | -24913.13 | 22.62 |
| -25148.87 | -1.32 | -25095.94 | 13.11 |           |        |           |       |           |       | -24936.06 | 18.94  | -24913.33 | 22.42 |
| -25148.19 | -0.63 | -25104.08 | 4.96  |           |        |           |       |           |       | -24937.68 | 17.32  | -24912.39 | 23.36 |

|           |       |           |       |
|-----------|-------|-----------|-------|
| -25149.03 | -1.47 | -25106.71 | 2.34  |
| -25147.25 | 0.30  | -25105.49 | 3.55  |
| -25147.24 | 0.31  | -25106.18 | 2.87  |
| -25136.89 | 10.66 | -25104.03 | 5.01  |
| -25148.74 | -1.19 | -25106.56 | 2.49  |
| -25146.91 | 0.65  | -25106.65 | 2.39  |
| -25147.25 | 0.31  | -25106.26 | 2.79  |
| -25148.25 | -0.70 | -25104.73 | 4.31  |
| -25146.12 | 1.44  | -25085.09 | 23.96 |
| -25139.90 | 7.65  | -25105.10 | 3.94  |
| -25146.61 | 0.95  | -25108.35 | 0.70  |
| -25149.44 | -1.89 |           |       |
| -25148.13 | -0.58 |           |       |
| -25146.78 | 0.77  |           |       |
| -25138.71 | 8.84  |           |       |
| -25145.50 | 2.06  |           |       |
| -25147.63 | -0.08 |           |       |
| -25148.61 | -1.05 |           |       |
| -25148.44 | -0.89 |           |       |

|           |       |
|-----------|-------|
| -24934.29 | 20.72 |
| -24937.71 | 17.30 |

Average energies

|           |      |           |      |           |      |           |       |           |       |           |       |           |       |
|-----------|------|-----------|------|-----------|------|-----------|-------|-----------|-------|-----------|-------|-----------|-------|
| -25147.48 | 0.08 | -25104.73 | 4.31 | -25064.35 | 6.19 | -25020.85 | 11.18 | -24977.88 | 15.64 | -24937.64 | 17.36 | -24914.59 | 21.16 |
|-----------|------|-----------|------|-----------|------|-----------|-------|-----------|-------|-----------|-------|-----------|-------|

# Ca<sub>1-x</sub>M<sub>x</sub>ZrTi<sub>2-2x</sub>Fe<sub>2x</sub>O<sub>7</sub> M=(Ce, Pu, Th, U)

## Ti(2)Ti(2)

N.B. All stated energies are in eV

| Ce                                  | ground | solid     |       |           |       |           |       |           |        |           |        |           |        |  |
|-------------------------------------|--------|-----------|-------|-----------|-------|-----------|-------|-----------|--------|-----------|--------|-----------|--------|--|
|                                     | state  | solution  |       |           |       |           |       |           |        |           |        |           |        |  |
|                                     | energy | energy    |       |           |       |           |       |           |        |           |        |           |        |  |
| concentration in solid solution (%) | 3      | 6         | 9     |           | 12    |           | 15    |           | 18     |           | 21     |           |        |  |
| number of atoms                     | 2      | 4         | 6     |           | 8     |           | 10    |           | 12     |           | 13     |           |        |  |
| -25147.37                           | -4.48  | -25105.58 | -5.86 | -25064.99 | -8.45 | -25020.47 | -7.10 | -24977.94 | -7.74  | -24940.37 | -13.34 | -24917.12 | -11.69 |  |
| -25147.84                           | -4.95  | -25106.06 | -6.34 | -25059.05 | -2.51 | -25021.72 | -8.35 | -24979.80 | -9.60  | -24939.74 | -12.72 | -24913.42 | -7.98  |  |
| -25147.30                           | -4.41  | -25104.32 | -4.61 | -25063.26 | -6.72 | -25021.26 | -7.89 | -24977.14 | -6.95  | -24939.77 | -12.75 | -24917.36 | -11.93 |  |
| -25147.82                           | -4.93  | -25105.39 | -5.68 | -25062.21 | -5.67 | -25020.49 | -7.12 | -24977.62 | -7.42  | -24937.04 | -10.02 | -24914.96 | -9.53  |  |
| -25148.37                           | -5.48  | -25105.12 | -5.40 | -25062.82 | -6.28 | -25019.06 | -5.69 | -24976.29 | -6.10  | -24938.55 | -11.53 | -24913.94 | -8.50  |  |
| -25147.92                           | -5.03  | -25104.03 | -4.32 | -25062.15 | -5.61 | -25022.71 | -9.34 | -24980.09 | -9.89  | -24935.27 | -8.25  | -24915.18 | -9.74  |  |
| -25148.25                           | -5.37  | -25103.91 | -4.19 | -25063.79 | -7.24 | -25021.33 | -7.96 | -24974.88 | -4.69  | -24979.19 | -52.17 | -24919.00 | -13.56 |  |
| -25148.95                           | -6.07  | -25104.49 | -4.77 | -25062.08 | -5.54 | -25021.19 | -7.82 | -24978.94 | -8.75  | -24934.12 | -7.10  | -24917.44 | -12.00 |  |
| -25148.01                           | -5.12  | -25106.10 | -6.38 | -25062.65 | -6.11 | -25019.35 | -5.98 | -24976.79 | -6.60  | -24940.44 | -13.42 | -24917.01 | -11.57 |  |
| -25148.55                           | -5.66  | -25105.82 | -6.10 | -25063.18 | -6.63 | -25018.36 | -4.99 | -24979.90 | -9.70  | -24936.65 | -9.63  | -24917.19 | -11.76 |  |
| -25146.96                           | -4.07  | -25104.67 | -4.96 | -25064.13 | -7.59 | -25021.00 | -7.63 | -24979.07 | -8.88  | -24937.61 | -10.59 | -24909.38 | -3.94  |  |
| -25147.47                           | -4.59  | -25104.64 | -4.92 | -25063.44 | -6.89 | -25020.82 | -7.45 | -24979.34 | -9.14  | -24938.91 | -11.89 | -24919.05 | -13.62 |  |
| -25147.77                           | -4.89  | -25105.78 | -6.07 | -25061.70 | -5.16 | -25022.23 | -8.86 | -24978.94 | -8.74  | -24934.92 | -7.89  | -24915.02 | -9.59  |  |
| -25149.07                           | -6.18  | -25106.70 | -6.98 | -25064.54 | -8.00 | -25020.54 | -7.18 | -24980.40 | -10.20 | -24937.13 | -10.10 | -24915.25 | -9.81  |  |
| -25148.55                           | -5.66  | -25106.40 | -6.68 | -25062.59 | -6.05 | -25022.78 | -9.41 | -24978.84 | -8.64  | -24938.14 | -11.12 | -24917.42 | -11.98 |  |
| -25148.77                           | -5.88  | -25106.76 | -7.05 | -25062.40 | -5.86 | -25022.81 | -9.44 | -24978.62 | -8.43  | -24934.19 | -7.17  | -24915.74 | -10.30 |  |
| -25148.75                           | -5.86  | -25106.38 | -6.66 | -25062.83 | -6.29 | -25020.99 | -7.62 | -24977.05 | -6.85  | -24938.56 | -11.54 | -24915.04 | -9.61  |  |
| -25147.26                           | -4.37  | -25106.03 | -6.31 | -25063.14 | -6.59 | -25019.43 | -6.06 | -24979.75 | -9.55  | -24932.92 | -5.90  | -24916.90 | -11.47 |  |
| -25149.95                           | -7.06  | -25105.23 | -5.51 | -25061.85 | -5.31 | -25019.18 | -5.81 | -24980.04 | -9.84  | -24939.12 | -12.10 | -24913.85 | -8.41  |  |
| -25149.79                           | -6.90  | -25106.14 | -6.43 | -25063.55 | -7.01 | -25020.26 | -6.89 | -24977.56 | -7.36  | -24936.98 | -9.96  | -24914.10 | -8.66  |  |
| -25148.48                           | -5.59  | -25105.43 | -5.71 | -25063.21 | -6.67 | -25020.39 | -7.03 | -24978.10 | -7.91  | -24938.01 | -10.99 | -24915.49 | -10.06 |  |
| -25148.90                           | -6.01  | -25100.85 | -1.13 | -25062.49 | -5.95 | -25020.44 | -7.07 | -24978.75 | -8.56  | -24932.05 | -5.03  | -24917.10 | -11.66 |  |
| -25148.09                           | -5.20  | -25106.27 | -6.55 | -25062.84 | -6.30 | -25019.10 | -5.73 | -24980.86 | -10.66 | -24932.27 | -5.25  | -24916.34 | -10.90 |  |
| -25147.75                           | -4.86  | -25106.78 | -7.07 | -25058.24 | -1.70 | -25019.91 | -6.54 | -24977.91 | -7.71  | -24937.09 | -10.07 | -24915.50 | -10.06 |  |
| -25147.70                           | -4.81  | -25107.19 | -7.47 | -25062.01 | -5.47 | -25020.31 | -6.94 | -24979.97 | -9.78  | -24937.64 | -10.62 | -24912.90 | -7.46  |  |
| -25147.87                           | -4.98  | -25106.19 | -6.47 | -25064.05 | -7.50 | -25021.86 | -8.49 | -24981.26 | -11.07 | -24933.13 | -6.11  | -24915.53 | -10.10 |  |
| -25148.56                           | -5.67  | -25102.19 | -2.47 | -25063.11 | -6.57 | -25021.58 | -8.22 | -24980.16 | -9.96  | -24935.39 | -8.37  | -24921.22 | -15.78 |  |
| -25146.65                           | -3.76  | -25103.39 | -3.68 | -25062.48 | -5.93 | -25022.06 | -8.69 | -24977.56 | -7.36  | -24937.57 | -10.55 | -24916.75 | -11.32 |  |
| -25148.93                           | -6.04  | -25105.70 | -5.98 | -25064.51 | -7.97 | -25015.12 | -1.76 | -24977.03 | -6.83  | -24938.93 | -11.91 | -24918.59 | -13.15 |  |



|           |       |           |       |           |       |           |        |           |        |           |        |           |        |
|-----------|-------|-----------|-------|-----------|-------|-----------|--------|-----------|--------|-----------|--------|-----------|--------|
| -25148.58 | -5.69 | -25105.36 | -5.65 | -25061.49 | -4.95 | -25022.15 | -8.78  | -24979.46 | -9.26  | -24937.16 | -10.14 | -24912.96 | -7.52  |
| -25148.58 | -5.69 | -25105.90 | -6.18 | -25063.73 | -7.19 | -25019.77 | -6.40  | -24980.81 | -10.62 | -24932.08 | -5.06  | -24916.54 | -11.10 |
| -25149.08 | -6.19 | -25104.97 | -5.25 | -25064.46 | -7.92 | -25021.88 | -8.51  | -24976.87 | -6.67  | -24937.89 | -10.87 | -24913.22 | -7.78  |
| -25148.71 | -5.82 | -25106.16 | -6.45 | -25064.23 | -7.68 | -25021.49 | -8.12  | -24976.60 | -6.40  | -24938.00 | -10.98 | -24917.76 | -12.33 |
| -25148.76 | -5.87 | -25105.51 | -5.79 | -25062.11 | -5.57 | -25020.99 | -7.62  | -24979.15 | -8.96  | -24939.90 | -12.88 | -24916.21 | -10.77 |
| -25148.04 | -5.15 | -25104.22 | -4.50 | -25062.58 | -6.04 | -25020.83 | -7.46  | -24981.52 | -11.33 | -24937.25 | -10.22 | -24915.32 | -9.89  |
| -25147.73 | -4.84 | -25103.44 | -3.73 | -25063.49 | -6.94 | -25022.47 | -9.10  | -24977.45 | -7.25  | -24936.18 | -9.16  | -24912.51 | -7.08  |
| -25148.09 | -5.20 | -25106.12 | -6.41 | -25062.16 | -5.62 | -25019.85 | -6.48  | -24973.72 | -3.53  | -24937.18 | -10.16 | -24914.65 | -9.21  |
| -25149.65 | -6.76 | -25107.43 | -7.71 | -25064.52 | -7.98 | -25019.92 | -6.55  | -24977.60 | -7.41  | -24937.75 | -10.73 | -24916.10 | -10.67 |
| -25148.11 | -5.22 | -25107.12 | -7.40 | -25063.19 | -6.65 | -25016.76 | -3.40  | -24977.80 | -7.60  | -24934.54 | -7.52  | -24916.25 | -10.81 |
| -25147.50 | -4.61 | -25105.12 | -5.41 | -25063.02 | -6.47 | -25020.16 | -6.79  | -24979.18 | -8.98  | -24934.92 | -7.89  | -24918.13 | -12.69 |
| -25147.74 | -4.85 | -25105.40 | -5.69 | -25061.84 | -5.30 | -25020.62 | -7.26  | -24980.08 | -9.89  | -24935.97 | -8.94  | -24918.40 | -12.97 |
| -25148.08 | -5.19 | -25107.38 | -7.66 | -25063.72 | -7.18 | -25019.68 | -6.31  | -24981.89 | -11.69 | -24935.49 | -8.47  | -24914.90 | -9.46  |
| -25149.41 | -6.52 | -25105.20 | -5.48 | -25064.35 | -7.81 | -25023.86 | -10.49 | -24979.92 | -9.72  | -24940.76 | -13.74 | -24918.42 | -12.98 |
| -25148.33 | -5.44 | -25105.33 | -5.62 | -25064.32 | -7.78 | -25021.24 | -7.87  | -24980.27 | -10.07 | -24936.91 | -9.89  | -24917.78 | -12.35 |
| -25148.92 | -6.03 | -25106.77 | -7.06 | -25064.01 | -7.47 | -25020.85 | -7.48  | -24978.38 | -8.19  | -24939.77 | -12.75 | -24916.05 | -10.62 |
| -25148.82 | -5.93 | -25106.02 | -6.30 | -25063.19 | -6.64 | -25019.38 | -6.01  | -24979.76 | -9.57  | -24938.99 | -11.97 | -24917.98 | -12.55 |
| -25148.95 | -6.06 | -25106.64 | -6.92 | -25065.98 | -9.44 | -25022.90 | -9.53  | -24979.31 | -9.12  | -24938.85 | -11.83 | -24918.52 | -13.09 |
| -25149.89 | -7.00 | -25106.31 | -6.60 | -25064.10 | -7.56 | -25020.43 | -7.06  | -24980.18 | -9.98  | -24939.14 | -12.12 | -24917.42 | -11.98 |
| -25148.69 | -5.80 | -25106.44 | -6.73 | -25064.49 | -7.95 | -25019.12 | -5.75  | -24978.26 | -8.07  | -24936.49 | -9.47  | -24915.10 | -9.67  |
| -25149.05 | -6.16 | -25107.11 | -7.40 | -25063.57 | -7.03 | -25020.92 | -7.56  | -24977.66 | -7.47  | -24935.14 | -8.12  | -24916.72 | -11.28 |
| -25148.13 | -5.25 | -25105.62 | -5.91 | -25064.24 | -7.69 | -25020.60 | -7.23  | -24980.31 | -10.12 | -24940.66 | -13.64 | -24918.61 | -13.18 |
| -25148.72 | -5.83 | -25103.69 | -3.98 | -25064.74 | -8.20 | -25021.51 | -8.14  | -24980.04 | -9.84  | -24934.58 | -7.56  | -24911.23 | -5.80  |
| -25146.98 | -4.10 | -25106.97 | -7.26 | -25063.84 | -7.30 | -25023.01 | -9.65  | -24979.17 | -8.98  | -24938.34 | -11.32 | -24917.50 | -12.06 |
| -25148.80 | -5.91 | -25105.39 | -5.67 | -25064.07 | -7.53 | -25023.61 | -10.24 | -24978.79 | -8.60  | -24938.60 | -11.57 | -24914.87 | -9.43  |
| -25147.31 | -4.42 | -25106.01 | -6.30 | -25063.34 | -6.80 | -25018.06 | -4.69  | -24979.91 | -9.71  | -24936.40 | -9.38  | -24916.38 | -10.95 |
| -25148.29 | -5.40 | -25104.95 | -5.24 | -25062.56 | -6.02 | -25024.06 | -10.69 | -24980.00 | -9.80  | -24937.88 | -10.86 | -24915.09 | -9.65  |
| -25149.52 | -6.63 | -25105.27 | -5.55 | -25061.58 | -5.04 | -25019.08 | -5.71  | -24977.20 | -7.00  | -24938.08 | -11.06 | -24920.69 | -15.25 |
| -25148.33 | -5.44 | -25104.02 | -4.30 | -25065.21 | -8.67 | -25021.90 | -8.53  | -24978.56 | -8.37  | -24935.68 | -8.66  | -24917.04 | -11.61 |
| -25147.76 | -4.87 | -25105.21 | -5.50 | -25062.64 | -6.09 | -25018.40 | -5.03  | -24978.77 | -8.57  | -24940.34 | -13.31 | -24915.64 | -10.20 |
| -25148.96 | -6.07 | -25105.01 | -5.29 | -25058.63 | -2.08 | -25018.02 | -4.65  | -24979.21 | -9.01  | -24938.92 | -11.90 | -24915.08 | -9.64  |
| -25149.26 | -6.37 | -25104.79 | -5.07 | -25064.44 | -7.90 | -25020.09 | -6.72  | -24980.38 | -10.19 | -24938.25 | -11.23 | -24913.12 | -7.68  |
| -25148.66 | -5.77 | -25104.37 | -4.66 | -25063.11 | -6.57 | -25022.21 | -8.84  | -24976.56 | -6.37  | -24939.27 | -12.25 | -24916.76 | -11.32 |
| -25148.64 | -5.75 | -25104.58 | -4.86 | -25062.10 | -5.55 | -25022.97 | -9.60  | -24982.53 | -12.33 | -24933.39 | -6.36  | -24917.18 | -11.74 |
| -25148.87 | -5.98 | -25104.11 | -4.40 | -25060.15 | -3.61 | -25019.87 | -6.50  | -24974.11 | -3.92  | -24937.16 | -10.14 | -24915.27 | -9.83  |
| -25148.88 | -6.00 | -25105.27 | -5.56 | -25063.81 | -7.27 | -25020.63 | -7.26  | -24978.25 | -8.05  | -24935.63 | -8.60  | -24915.86 | -10.42 |
| -25149.77 | -6.88 | -25104.69 | -4.98 | -25062.14 | -5.59 | -25022.17 | -8.80  | -24978.95 | -8.75  | -24935.49 | -8.47  | -24908.73 | -3.30  |
| -25148.71 | -5.83 | -25106.16 | -6.44 | -25062.21 | -5.67 | -25021.01 | -7.64  | -24978.67 | -8.47  | -24936.25 | -9.23  | -24916.59 | -11.15 |
| -25148.60 | -5.71 | -25107.04 | -7.32 | -25063.04 | -6.49 | -25017.45 | -4.08  | -24981.26 | -11.06 | -24938.64 | -11.62 | -24920.89 | -15.46 |
| -25148.86 | -5.97 | -25105.28 | -5.56 | -25062.48 | -5.94 | -25021.30 | -7.93  | -24978.89 | -8.69  | -24938.57 | -11.55 | -24915.30 | -9.86  |
| -25148.66 | -5.77 | -25105.43 | -5.71 | -25060.53 | -3.98 | -25020.93 | -7.56  | -24980.35 | -10.15 | -24937.55 | -10.53 | -24917.21 | -11.78 |

|           |       |           |       |           |       |           |        |           |        |           |        |           |        |
|-----------|-------|-----------|-------|-----------|-------|-----------|--------|-----------|--------|-----------|--------|-----------|--------|
| -25147.79 | -4.90 | -25105.84 | -6.13 | -25062.68 | -6.14 | -25018.96 | -5.59  | -24980.90 | -10.70 | -24935.17 | -8.15  | -24911.64 | -6.20  |
| -25147.61 | -4.72 | -25104.72 | -5.01 | -25062.62 | -6.07 | -25022.22 | -8.85  | -24981.42 | -11.22 | -24933.06 | -6.04  | -24917.19 | -11.75 |
| -25148.39 | -5.50 | -25105.01 | -5.29 | -25064.45 | -7.90 | -25015.52 | -2.15  | -24976.57 | -6.38  | -24934.23 | -7.21  | -24912.76 | -7.33  |
| -25148.64 | -5.75 | -25103.89 | -4.18 | -25060.59 | -4.05 | -25021.34 | -7.97  | -24977.62 | -7.43  | -24939.37 | -12.35 | -24917.08 | -11.65 |
| -25148.45 | -5.56 | -25105.40 | -5.68 | -25064.45 | -7.91 | -25021.94 | -8.58  | -24979.86 | -9.67  | -24937.07 | -10.05 | -24911.75 | -6.31  |
| -25148.47 | -5.58 | -25104.23 | -4.51 | -25063.83 | -7.29 | -25020.38 | -7.01  | -24979.46 | -9.27  | -24930.36 | -3.33  | -24917.65 | -12.21 |
| -25148.30 | -5.41 | -25107.21 | -7.50 | -25061.14 | -4.59 | -25020.05 | -6.68  | -24978.21 | -8.02  | -24938.55 | -11.53 | -24915.53 | -10.09 |
| -25148.71 | -5.82 | -25104.84 | -5.12 | -25064.69 | -8.15 | -25019.86 | -6.49  | -24972.85 | -2.66  | -24938.41 | -11.38 | -24917.01 | -11.58 |
| -25149.83 | -6.94 | -25103.84 | -4.12 | -25063.55 | -7.00 | -25019.40 | -6.03  | -24979.99 | -9.79  | -24935.82 | -8.80  | -24918.67 | -13.23 |
| -25149.35 | -6.47 | -25106.64 | -6.93 | -25063.60 | -7.06 | -25022.94 | -9.57  | -24979.33 | -9.13  | -24937.99 | -10.97 | -24914.98 | -9.54  |
| -25148.13 | -5.24 | -25104.40 | -4.69 | -25059.43 | -2.89 | -25020.26 | -6.89  | -24980.40 | -10.21 | -24934.39 | -7.36  | -24917.79 | -12.36 |
| -25148.56 | -5.67 | -25106.14 | -6.42 | -25062.64 | -6.10 | -25017.27 | -3.90  | -24977.44 | -7.24  | -24936.72 | -9.69  | -24917.72 | -12.28 |
| -25146.51 | -3.62 | -25105.98 | -6.26 | -25063.29 | -6.74 | -25020.07 | -6.71  | -24978.07 | -7.87  | -24941.87 | -14.85 | -24916.58 | -11.14 |
| -25148.39 | -5.50 | -25106.36 | -6.65 | -25060.05 | -3.51 | -25019.45 | -6.08  | -24979.40 | -9.20  | -24937.76 | -10.73 | -24918.50 | -13.06 |
| -25146.82 | -3.93 | -25106.97 | -7.25 | -25063.07 | -6.53 | -25022.22 | -8.85  | -24979.05 | -8.85  | -24937.48 | -10.45 | -24914.23 | -8.79  |
| -25148.96 | -6.07 | -25105.03 | -5.31 | -25063.09 | -6.55 | -25018.96 | -5.60  | -24974.78 | -4.59  | -24933.90 | -6.87  | -24909.78 | -4.35  |
| -25147.19 | -4.30 | -25105.60 | -5.89 | -25062.95 | -6.41 | -25020.55 | -7.18  | -24975.70 | -5.51  | -24937.57 | -10.54 | -24916.52 | -11.08 |
| -25148.97 | -6.08 | -25105.78 | -6.06 | -25063.68 | -7.14 | -25021.11 | -7.74  | -24981.04 | -10.85 | -24938.99 | -11.97 | -24914.58 | -9.15  |
| -25149.08 | -6.19 | -25106.47 | -6.76 | -25064.43 | -7.89 | -25019.09 | -5.72  | -24977.66 | -7.46  | -24937.82 | -10.80 | -24914.91 | -9.48  |
| -25147.44 | -4.55 | -25106.66 | -6.94 | -25062.51 | -5.97 | -25018.33 | -4.96  | -24977.06 | -6.87  | -24936.17 | -9.14  | -24917.85 | -12.41 |
| -25147.12 | -4.23 | -25105.80 | -6.09 | -25064.06 | -7.52 | -25013.42 | -0.05  | -24980.32 | -10.12 | -24930.91 | -3.89  | -24914.53 | -9.09  |
| -25148.68 | -5.79 | -25102.70 | -2.98 | -25064.15 | -7.60 | -25020.73 | -7.36  | -24979.34 | -9.14  | -24935.34 | -8.31  | -24915.67 | -10.24 |
| -25149.64 | -6.75 | -25104.07 | -4.35 | -25063.78 | -7.23 | -25021.49 | -8.12  | -24978.43 | -8.23  | -24937.85 | -10.83 | -24918.25 | -12.81 |
| -25149.24 | -6.36 | -25104.46 | -4.75 | -25062.74 | -6.19 | -25022.61 | -9.25  | -24976.18 | -5.99  | -24933.87 | -6.85  | -24914.94 | -9.50  |
| -25148.15 | -5.26 | -25104.94 | -5.23 | -25061.97 | -5.43 | -25022.50 | -9.13  | -24978.99 | -8.79  | -24936.26 | -9.23  | -24910.62 | -5.18  |
| -25147.63 | -4.75 | -25104.21 | -4.50 | -25063.79 | -7.25 | -25019.01 | -5.64  | -24979.11 | -8.91  | -24933.67 | -6.65  | -24915.40 | -9.97  |
| -25149.08 | -6.19 | -25106.51 | -6.79 | -25063.62 | -7.08 | -25023.08 | -9.72  | -24981.71 | -11.52 | -24937.98 | -10.96 | -24912.61 | -7.17  |
| -25147.48 | -4.59 | -25105.91 | -6.19 | -25062.76 | -6.22 | -25021.92 | -8.55  | -24976.58 | -6.39  | -24939.87 | -12.85 | -24915.49 | -10.06 |
| -25147.77 | -4.88 | -25105.37 | -5.66 | -25064.63 | -8.09 | -25019.65 | -6.28  | -24981.74 | -11.54 | -24938.57 | -11.54 | -24917.91 | -12.47 |
| -25147.98 | -5.09 | -25106.32 | -6.60 | -25063.05 | -6.51 | -25020.13 | -6.76  | -24979.52 | -9.33  | -24935.75 | -8.72  | -24918.03 | -12.59 |
| -25146.52 | -3.63 | -25104.26 | -4.55 | -25059.36 | -2.82 | -25021.13 | -7.76  | -24979.75 | -9.56  | -24940.16 | -13.13 | -24914.91 | -9.48  |
| -25149.12 | -6.23 | -25105.46 | -5.74 | -25064.16 | -7.61 | -25020.57 | -7.20  | -24980.05 | -9.86  | -24936.62 | -9.60  | -24914.31 | -8.88  |
| -25148.79 | -5.90 | -25105.68 | -5.96 | -25063.97 | -7.43 | -25023.88 | -10.51 | -24979.02 | -8.82  | -24939.88 | -12.85 | -24914.82 | -9.39  |
| -25149.22 | -6.33 | -25106.53 | -6.82 | -25058.69 | -2.15 | -25021.77 | -8.40  | -24980.27 | -10.07 | -24931.61 | -4.59  | -24917.94 | -12.50 |
| -25147.75 | -4.86 | -25104.64 | -4.93 | -25063.10 | -6.56 | -25022.87 | -9.51  | -24978.50 | -8.30  | -24940.22 | -13.20 | -24914.64 | -9.20  |
| -25149.73 | -6.84 | -25105.41 | -5.70 | -25063.95 | -7.41 | -25019.08 | -5.71  | -24980.67 | -10.47 | -24939.11 | -12.09 | -24916.16 | -10.73 |
| -25148.17 | -5.28 | -25106.41 | -6.70 | -25065.41 | -8.87 | -25018.29 | -4.92  | -24978.28 | -8.08  | -24938.14 | -11.12 | -24913.32 | -7.89  |
| -25147.34 | -4.45 | -25105.56 | -5.84 | -25064.31 | -7.77 | -25020.47 | -7.10  | -24979.91 | -9.71  | -24939.50 | -12.47 | -24914.78 | -9.34  |
| -25149.71 | -6.82 | -25103.71 | -4.00 | -25062.16 | -5.62 | -25019.64 | -6.28  | -24979.34 | -9.14  | -24937.72 | -10.70 | -24909.78 | -4.34  |
| -25149.02 | -6.13 | -25104.99 | -5.28 | -25064.16 | -7.62 | -25020.81 | -7.44  | -24980.97 | -10.78 | -24938.28 | -11.25 | -24917.86 | -12.43 |
| -25148.97 | -6.08 | -25105.30 | -5.58 | -25063.98 | -7.44 | -25017.63 | -4.26  | -24978.36 | -8.16  | -24939.52 | -12.50 | -24919.28 | -13.85 |

|           |       |           |       |           |       |           |       |           |       |           |        |           |        |
|-----------|-------|-----------|-------|-----------|-------|-----------|-------|-----------|-------|-----------|--------|-----------|--------|
| -25148.30 | -5.41 | -25104.45 | -4.73 | -25062.68 | -6.14 | -25021.00 | -7.63 | -24979.46 | -9.26 | -24937.13 | -10.11 | -24915.87 | -10.44 |
| -25148.11 | -5.22 | -25104.87 | -5.15 | -25064.28 | -7.73 | -25020.83 | -7.46 | -24977.72 | -7.53 | -24937.81 | -10.79 | -24914.50 | -9.07  |
| -25148.75 | -5.86 | -25106.90 | -7.19 | -25065.85 | -9.31 | -25019.42 | -6.05 | -24980.01 | -9.81 | -24938.17 | -11.15 | -24915.75 | -10.32 |
| -25147.70 | -4.82 | -25104.79 | -5.08 | -25063.16 | -6.62 | -25022.20 | -8.83 | -24978.97 | -8.78 | -24938.70 | -11.68 | -24917.37 | -11.93 |
| -25148.76 | -5.87 | -25104.34 | -4.63 | -25064.61 | -8.07 | -25020.09 | -6.72 | -24979.92 | -9.72 | -24936.43 | -9.41  | -24915.09 | -9.65  |
| -25149.72 | -6.83 | -25104.96 | -5.25 | -25061.02 | -4.48 | -25022.73 | -9.36 | -24977.70 | -7.51 | -24936.18 | -9.16  | -24914.80 | -9.36  |
| -25148.94 | -6.05 | -25105.82 | -6.11 | -25058.31 | -1.77 | -25020.77 | -7.40 | -24977.10 | -6.90 | -24928.40 | -1.38  | -24916.36 | -10.92 |
| -25148.92 | -6.03 | -25106.43 | -6.71 |           |       | -25021.78 | -8.42 | -24979.80 | -9.60 |           |        | -24916.88 | -11.44 |
| -25148.13 | -5.25 |           |       |           |       |           |       | -24979.00 | -8.80 |           |        |           |        |

Average energies

|           |       |           |       |           |       |           |       |           |       |           |        |           |        |
|-----------|-------|-----------|-------|-----------|-------|-----------|-------|-----------|-------|-----------|--------|-----------|--------|
| -25148.42 | -5.53 | -25105.40 | -5.69 | -25062.99 | -6.45 | -25020.57 | -7.21 | -24978.85 | -8.65 | -24937.36 | -10.33 | -24915.83 | -10.40 |
|-----------|-------|-----------|-------|-----------|-------|-----------|-------|-----------|-------|-----------|--------|-----------|--------|

ground state energy  
solid solution energy

**Pu**

concentration in solid solution (%)  
number of atoms

|           | 3     | 6         | 9     | 12        | 15    | 18        | 21     |           |        |           |        |           |        |
|-----------|-------|-----------|-------|-----------|-------|-----------|--------|-----------|--------|-----------|--------|-----------|--------|
|           | 2     | 4         | 6     | 8         | 10    | 12        | 13     |           |        |           |        |           |        |
| -25143.40 | -6.50 | -25093.87 | -6.13 | -25042.39 | -3.80 | -24996.87 | -7.45  | -24951.14 | -10.87 | -24903.88 | -12.77 | -24873.50 | -6.97  |
| -25142.79 | -5.88 | -25094.24 | -6.50 | -25047.30 | -8.72 | -24997.83 | -8.40  | -24949.79 | -9.52  | -24902.21 | -11.10 | -24879.76 | -13.23 |
| -25142.99 | -6.08 | -25093.28 | -5.53 | -25045.19 | -6.60 | -24997.40 | -7.97  | -24947.05 | -6.79  | -24900.33 | -9.22  | -24877.31 | -10.78 |
| -25143.30 | -6.39 | -25092.68 | -4.93 | -25047.13 | -8.54 | -24999.29 | -9.86  | -24951.01 | -10.75 | -24898.01 | -6.90  | -24880.06 | -13.53 |
| -25141.39 | -4.48 | -25094.03 | -6.28 | -25044.06 | -5.48 | -24997.28 | -7.85  | -24947.12 | -6.85  | -24903.70 | -12.59 | -24878.83 | -12.30 |
| -25143.12 | -6.21 | -25095.14 | -7.40 | -25043.85 | -5.26 | -24995.55 | -6.12  | -24952.52 | -12.25 | -24903.35 | -12.24 | -24878.96 | -12.43 |
| -25141.83 | -4.92 | -25093.80 | -6.06 | -25041.03 | -2.44 | -24996.88 | -7.46  | -24948.52 | -8.25  | -24902.78 | -11.67 | -24878.63 | -12.10 |
| -25141.97 | -5.07 | -25093.81 | -6.07 | -25045.88 | -7.30 | -24997.43 | -8.01  | -24949.29 | -9.02  | -24901.80 | -10.69 | -24880.02 | -13.49 |
| -25142.90 | -6.00 | -25094.84 | -7.10 | -25044.57 | -5.98 | -24997.61 | -8.18  | -24949.81 | -9.54  | -24901.78 | -10.67 | -24880.55 | -14.02 |
| -25142.36 | -5.45 | -25094.33 | -6.58 | -25042.57 | -3.99 | -24997.26 | -7.84  | -24949.86 | -9.59  | -24904.23 | -13.12 | -24877.60 | -11.07 |
| -25142.37 | -5.46 | -25092.07 | -4.33 | -25045.32 | -6.73 | -24998.36 | -8.94  | -24950.46 | -10.19 | -24903.01 | -11.91 | -24878.83 | -12.30 |
| -25142.38 | -5.48 | -25093.69 | -5.95 | -25044.93 | -6.34 | -24999.38 | -9.95  | -24950.72 | -10.45 | -24900.71 | -9.60  | -24879.60 | -13.07 |
| -25142.79 | -5.89 | -25092.78 | -5.03 | -25048.07 | -9.48 | -25000.52 | -11.09 | -24949.42 | -9.15  | -24904.08 | -12.97 | -24881.06 | -14.53 |
| -25141.96 | -5.05 | -25094.40 | -6.66 | -25045.53 | -6.94 | -24994.28 | -4.86  | -24952.31 | -12.05 | -24900.80 | -9.69  | -24879.78 | -13.25 |
| -25142.89 | -5.98 | -25094.69 | -6.95 | -25047.34 | -8.75 | -24996.69 | -7.26  | -24950.09 | -9.82  | -24903.03 | -11.92 | -24878.80 | -12.27 |
| -25143.00 | -6.09 | -25093.13 | -5.38 | -25042.55 | -3.97 | -24994.85 | -5.42  | -24948.56 | -8.29  | -24900.66 | -9.55  | -24878.77 | -12.24 |
| -25142.25 | -5.35 | -25095.54 | -7.79 | -25046.55 | -7.97 | -24999.70 | -10.28 | -24950.61 | -10.34 | -24901.23 | -10.12 | -24877.43 | -10.90 |
| -25142.59 | -5.69 | -25093.37 | -5.63 | -25044.66 | -6.08 | -24995.99 | -6.56  | -24947.43 | -7.16  | -24902.23 | -11.12 | -24877.91 | -11.38 |
| -25143.16 | -6.26 | -25092.80 | -5.06 | -25044.28 | -5.69 | -24999.58 | -10.16 | -24950.60 | -10.33 | -24899.63 | -8.52  | -24879.53 | -13.00 |
| -25144.91 | -8.01 | -25092.62 | -4.88 | -25047.43 | -8.85 | -24997.84 | -8.41  | -24946.71 | -6.44  | -24905.09 | -13.98 | -24878.52 | -11.99 |
| -25143.20 | -6.29 | -25093.83 | -6.09 | -25042.17 | -3.59 | -24997.40 | -7.98  | -24950.31 | -10.04 | -24904.82 | -13.71 | -24880.34 | -13.81 |
| -25142.24 | -5.34 | -25094.67 | -6.93 | -25045.83 | -7.24 | -24997.90 | -8.48  | -24952.22 | -11.95 | -24902.98 | -11.87 | -24879.16 | -12.63 |
| -25142.25 | -5.34 | -25092.17 | -4.43 | -25046.07 | -7.48 | -24998.88 | -9.45  | -24951.61 | -11.34 | -24903.30 | -12.19 | -24878.51 | -11.98 |

|           |       |           |       |           |       |           |        |           |        |           |        |           |        |
|-----------|-------|-----------|-------|-----------|-------|-----------|--------|-----------|--------|-----------|--------|-----------|--------|
| -25142.62 | -5.72 | -25094.08 | -6.33 | -25043.47 | -4.88 | -24998.61 | -9.18  | -24950.75 | -10.48 | -24900.39 | -9.28  | -24878.87 | -12.34 |
| -25142.40 | -5.49 | -25091.38 | -3.63 | -25042.93 | -4.34 | -24998.69 | -9.26  | -24949.76 | -9.49  | -24904.05 | -12.94 | -24874.69 | -8.16  |
| -25141.32 | -4.42 | -25093.57 | -5.82 | -25041.54 | -2.96 | -24995.03 | -5.61  | -24949.93 | -9.66  | -24898.78 | -7.67  | -24877.86 | -11.33 |
| -25142.80 | -5.89 | -25093.33 | -5.59 | -25045.84 | -7.25 | -24999.50 | -10.08 | -24949.82 | -9.55  | -24903.13 | -12.02 | -24880.30 | -13.77 |
| -25142.17 | -5.27 | -25092.79 | -5.04 | -25046.44 | -7.86 | -24996.43 | -7.01  | -24952.24 | -11.97 | -24903.73 | -12.62 | -24879.93 | -13.40 |
| -25141.10 | -4.20 | -25093.36 | -5.61 | -25041.81 | -3.22 | -24999.41 | -9.99  | -24947.29 | -7.02  | -24900.92 | -9.81  | -24878.70 | -12.17 |
| -25142.85 | -5.95 | -25093.91 | -6.17 | -25044.80 | -6.22 | -24994.46 | -5.04  | -24948.55 | -8.28  | -24904.04 | -12.93 | -24880.86 | -14.33 |
| -25142.80 | -5.90 | -25094.20 | -6.46 | -25044.49 | -5.90 | -24997.76 | -8.34  | -24951.65 | -11.39 | -24904.99 | -13.88 | -24877.56 | -11.03 |
| -25143.53 | -6.63 | -25092.01 | -4.27 | -25043.52 | -4.93 | -24998.15 | -8.73  | -24949.18 | -8.91  | -24898.09 | -6.98  | -24878.21 | -11.68 |
| -25143.11 | -6.20 | -25094.20 | -6.46 | -25046.67 | -8.09 | -24999.17 | -9.75  | -24948.89 | -8.62  | -24902.35 | -11.24 | -24881.11 | -14.58 |
| -25141.41 | -4.50 | -25094.31 | -6.57 | -25043.44 | -4.85 | -24998.37 | -8.95  | -24949.91 | -9.64  | -24903.51 | -12.40 | -24878.00 | -11.47 |
| -25142.92 | -6.02 | -25094.88 | -7.14 | -25048.16 | -9.57 | -24996.95 | -7.52  | -24950.02 | -9.75  | -24905.10 | -13.99 | -24876.96 | -10.43 |
| -25142.07 | -5.17 | -25094.23 | -6.48 | -25046.11 | -7.52 | -25000.08 | -10.65 | -24952.13 | -11.86 | -24903.69 | -12.58 | -24876.59 | -10.06 |
| -25143.50 | -6.59 | -25095.10 | -7.36 | -25046.53 | -7.94 | -24997.97 | -8.54  | -24948.78 | -8.51  | -24899.35 | -8.24  | -24879.53 | -13.00 |
| -25142.29 | -5.39 | -25094.19 | -6.45 | -25045.20 | -6.61 | -24998.79 | -9.37  | -24950.14 | -9.87  | -24903.83 | -12.72 | -24877.56 | -11.03 |
| -25143.99 | -7.09 | -25093.21 | -5.46 | -25044.99 | -6.40 | -24998.82 | -9.39  | -24949.16 | -8.89  | -24900.89 | -9.78  | -24880.15 | -13.62 |
| -25142.56 | -5.65 | -25093.58 | -5.83 | -25045.30 | -6.71 | -24996.03 | -6.61  | -24948.90 | -8.63  | -24901.88 | -10.77 | -24877.07 | -10.54 |
| -25141.79 | -4.88 | -25094.69 | -6.95 | -25046.46 | -7.87 | -24994.44 | -5.01  | -24949.73 | -9.46  | -24900.42 | -9.31  | -24882.19 | -15.66 |
| -25142.65 | -5.75 | -25093.25 | -5.50 | -25045.86 | -7.27 | -24995.29 | -5.86  | -24949.23 | -8.96  | -24899.50 | -8.39  | -24879.43 | -12.90 |
| -25142.98 | -6.08 | -25093.04 | -5.29 | -25044.97 | -6.38 | -24996.48 | -7.05  | -24950.12 | -9.85  | -24905.68 | -14.58 | -24876.83 | -10.30 |
| -25142.03 | -5.12 | -25093.52 | -5.78 | -25045.96 | -7.37 | -24996.05 | -6.63  | -24948.84 | -8.57  | -24903.17 | -12.06 | -24879.28 | -12.75 |
| -25144.16 | -7.25 | -25093.86 | -6.11 | -25043.95 | -5.37 | -24997.33 | -7.90  | -24951.42 | -11.15 | -24902.78 | -11.67 | -24876.18 | -9.65  |
| -25142.99 | -6.08 | -25093.58 | -5.84 | -25046.06 | -7.47 | -24996.86 | -7.43  | -24951.87 | -11.61 | -24902.15 | -11.04 | -24880.05 | -13.52 |
| -25141.64 | -4.74 | -25095.06 | -7.32 | -25045.12 | -6.54 | -24997.50 | -8.08  | -24947.51 | -7.24  | -24904.43 | -13.32 | -24878.04 | -11.51 |
| -25141.59 | -4.68 | -25095.39 | -7.65 | -25044.41 | -5.82 | -24999.45 | -10.02 | -24951.56 | -11.29 | -24901.73 | -10.62 | -24879.13 | -12.60 |
| -25141.50 | -4.60 | -25093.45 | -5.71 | -25046.16 | -7.57 | -24997.49 | -8.07  | -24951.18 | -10.91 | -24903.46 | -12.35 | -24873.76 | -7.23  |
| -25142.01 | -5.11 | -25095.49 | -7.75 | -25046.94 | -8.35 | -24997.17 | -7.74  | -24949.42 | -9.15  | -24904.59 | -13.48 | -24880.45 | -13.92 |
| -25141.96 | -5.06 | -25093.98 | -6.24 | -25044.86 | -6.28 | -24998.53 | -9.10  | -24948.56 | -8.30  | -24898.44 | -7.33  | -24880.05 | -13.52 |
| -25142.52 | -5.62 | -25094.24 | -6.50 | -25046.38 | -7.79 | -24996.77 | -7.34  | -24951.15 | -10.88 | -24904.35 | -13.24 | -24879.56 | -13.03 |
| -25142.91 | -6.00 | -25092.35 | -4.61 | -25045.12 | -6.53 | -24998.45 | -9.02  | -24951.83 | -11.57 | -24903.44 | -12.33 | -24879.54 | -13.01 |
| -25140.45 | -3.55 | -25094.26 | -6.52 | -25046.16 | -7.58 | -24997.86 | -8.44  | -24950.83 | -10.56 | -24901.84 | -10.73 | -24878.36 | -11.83 |
| -25142.84 | -5.94 | -25093.81 | -6.07 | -25045.72 | -7.14 | -24998.33 | -8.90  | -24950.73 | -10.47 | -24904.06 | -12.95 | -24879.07 | -12.54 |
| -25142.66 | -5.76 | -25094.15 | -6.40 | -25046.90 | -8.32 | -24998.21 | -8.78  | -24950.15 | -9.89  | -24901.29 | -10.18 | -24880.70 | -14.16 |
| -25143.07 | -6.16 | -25092.89 | -5.14 | -25046.67 | -8.09 | -24992.23 | -2.81  | -24949.23 | -8.96  | -24904.82 | -13.71 | -24877.54 | -11.01 |
| -25142.63 | -5.72 | -25093.34 | -5.60 | -25045.90 | -7.31 | -24997.62 | -8.19  | -24950.01 | -9.74  | -24901.24 | -10.13 | -24878.18 | -11.65 |
| -25142.30 | -5.39 | -25093.79 | -6.04 | -25046.32 | -7.74 | -24997.48 | -8.05  | -24950.20 | -9.93  | -24900.48 | -9.37  | -24877.39 | -10.86 |
| -25143.22 | -6.31 | -25094.51 | -6.76 | -25046.93 | -8.35 | -24997.78 | -8.36  | -24949.70 | -9.43  | -24901.91 | -10.80 | -24879.66 | -13.12 |
| -25142.03 | -5.12 | -25093.96 | -6.21 | -25046.79 | -8.21 | -24997.20 | -7.78  | -24950.62 | -10.35 | -24899.46 | -8.35  | -24878.54 | -12.01 |
| -25141.90 | -5.00 | -25092.42 | -4.67 | -25047.24 | -8.66 | -24995.44 | -6.02  | -24950.82 | -10.55 | -24901.61 | -10.50 | -24878.35 | -11.82 |
| -25143.01 | -6.11 | -25092.23 | -4.48 | -25046.96 | -8.37 | -24996.04 | -6.61  | -24952.41 | -12.14 | -24900.14 | -9.03  | -24881.22 | -14.69 |
| -25142.66 | -5.76 | -25094.44 | -6.69 | -25045.59 | -7.01 | -24999.70 | -10.28 | -24951.76 | -11.49 | -24903.25 | -12.14 | -24880.90 | -14.36 |

|           |       |           |       |           |       |           |        |           |        |           |        |           |        |
|-----------|-------|-----------|-------|-----------|-------|-----------|--------|-----------|--------|-----------|--------|-----------|--------|
| -25143.12 | -6.21 | -25093.36 | -5.61 | -25046.30 | -7.72 | -24998.54 | -9.12  | -24948.43 | -8.16  | -24904.51 | -13.40 | -24880.46 | -13.93 |
| -25141.49 | -4.58 | -25094.74 | -7.00 | -25043.79 | -5.20 | -24997.13 | -7.70  | -24948.57 | -8.30  | -24902.02 | -10.91 | -24875.62 | -9.08  |
| -25142.61 | -5.71 | -25094.88 | -7.13 | -25044.95 | -6.37 | -24997.54 | -8.11  | -24949.65 | -9.39  | -24902.90 | -11.79 | -24880.88 | -14.35 |
| -25142.73 | -5.82 | -25094.48 | -6.74 | -25043.76 | -5.17 | -24997.69 | -8.26  | -24950.95 | -10.68 | -24901.92 | -10.81 | -24880.69 | -14.16 |
| -25141.47 | -4.57 | -25092.70 | -4.96 | -25045.43 | -6.84 | -24997.31 | -7.89  | -24944.90 | -4.63  | -24901.87 | -10.76 | -24879.94 | -13.41 |
| -25143.69 | -6.79 | -25093.84 | -6.10 | -25046.42 | -7.83 | -24995.52 | -6.10  | -24947.82 | -7.55  | -24900.79 | -9.68  | -24881.19 | -14.66 |
| -25141.34 | -4.44 | -25092.81 | -5.06 | -24998.59 | 39.99 | -24998.03 | -8.60  | -24904.83 | 35.44  | -24877.98 | 13.13  | -24882.15 | -15.61 |
| -25094.61 | 42.29 | -25046.65 | 41.09 | -25046.16 | -7.57 | -24950.77 | 38.66  | -24951.03 | -10.76 | -24901.40 | -10.29 | -24878.12 | -11.59 |
| -25143.28 | -6.38 | -25095.04 | -7.30 | -25046.22 | -7.63 | -24998.77 | -9.34  | -24950.53 | -10.26 | -24903.68 | -12.57 | -24878.80 | -12.27 |
| -25142.21 | -5.31 | -25095.40 | -7.65 | -25045.78 | -7.19 | -24997.69 | -8.26  | -24952.32 | -12.05 | -24903.04 | -11.94 | -24880.55 | -14.02 |
| -25143.06 | -6.16 | -25093.39 | -5.64 | -25047.52 | -8.93 | -24995.76 | -6.33  | -24949.76 | -9.49  | -24901.48 | -10.37 | -24878.15 | -11.62 |
| -25139.95 | -3.05 | -25092.28 | -4.53 | -25045.75 | -7.17 | -24998.08 | -8.66  | -24950.14 | -9.87  | -24901.31 | -10.20 | -24878.32 | -11.79 |
| -25141.78 | -4.88 | -25094.46 | -6.72 | -25044.79 | -6.20 | -24996.12 | -6.69  | -24948.48 | -8.21  | -24903.84 | -12.73 | -24877.62 | -11.09 |
| -25143.17 | -6.27 | -25091.40 | -3.66 | -25044.60 | -6.01 | -24997.30 | -7.88  | -24950.39 | -10.12 | -24903.00 | -11.89 | -24880.86 | -14.33 |
| -25142.64 | -5.73 | -25093.18 | -5.44 | -25046.08 | -7.50 | -24997.38 | -7.96  | -24950.35 | -10.08 | -24904.66 | -13.55 | -24879.93 | -13.40 |
| -25141.39 | -4.49 | -25094.55 | -6.80 | -25046.78 | -8.20 | -24996.81 | -7.38  | -24950.06 | -9.79  | -24900.45 | -9.34  | -24879.94 | -13.41 |
| -25141.87 | -4.96 | -25093.90 | -6.15 | -25047.17 | -8.59 | -25000.63 | -11.20 | -24950.21 | -9.94  | -24902.07 | -10.96 | -24879.55 | -13.02 |
| -25141.50 | -4.60 | -25093.94 | -6.19 | -25045.37 | -6.79 | -24996.62 | -7.20  | -24951.52 | -11.25 | -24899.36 | -8.25  | -24877.84 | -11.31 |
| -25143.01 | -6.10 | -25094.40 | -6.65 | -25042.50 | -3.91 | -24997.72 | -8.30  | -24950.94 | -10.67 | -24903.74 | -12.63 | -24877.45 | -10.92 |
| -25141.86 | -4.95 | -25095.48 | -7.74 | -25046.18 | -7.59 | -24998.07 | -8.64  | -24952.06 | -11.79 | -24902.86 | -11.75 | -24879.35 | -12.82 |
| -25144.00 | -7.10 | -25092.39 | -4.65 | -25045.50 | -6.92 | -24997.31 | -7.88  | -24949.68 | -9.41  | -24902.92 | -11.81 | -24877.68 | -11.15 |
| -25142.36 | -5.45 | -25093.12 | -5.38 | -25047.09 | -8.51 | -24997.38 | -7.96  | -24950.81 | -10.54 | -24903.37 | -12.26 | -24881.20 | -14.67 |
| -25142.19 | -5.28 | -25093.46 | -5.71 | -25045.06 | -6.48 | -24994.74 | -5.31  | -24951.18 | -10.91 | -24901.02 | -9.91  | -24878.59 | -12.06 |
| -25141.92 | -5.01 | -25092.79 | -5.05 | -25044.60 | -6.02 | -24998.61 | -9.18  | -24951.30 | -11.03 | -24902.25 | -11.14 | -24880.63 | -14.10 |
| -25142.49 | -5.59 | -25095.08 | -7.34 | -25047.96 | -9.37 | -24996.95 | -7.52  | -24950.19 | -9.92  | -24903.86 | -12.75 | -24876.09 | -9.56  |
| -25142.89 | -5.99 | -25093.90 | -6.15 | -25044.97 | -6.39 | -24997.39 | -7.96  | -24948.46 | -8.19  | -24901.03 | -9.92  | -24875.93 | -9.40  |
| -25142.88 | -5.98 | -25092.77 | -5.03 | -25046.88 | -8.29 | -24997.27 | -7.84  | -24949.76 | -9.49  | -24901.84 | -10.73 | -24880.21 | -13.68 |
| -25141.78 | -4.88 | -25093.34 | -5.59 | -25046.42 | -7.83 | -24997.93 | -8.51  | -24950.34 | -10.07 | -24901.51 | -10.40 | -24877.51 | -10.98 |
| -25143.64 | -6.73 | -25093.92 | -6.17 | -25046.26 | -7.68 | -24998.39 | -8.96  | -24949.66 | -9.39  | -24900.75 | -9.64  | -24876.56 | -10.03 |
| -25142.49 | -5.58 | -25092.61 | -4.86 | -25044.58 | -5.99 | -24998.46 | -9.03  | -24948.35 | -8.08  | -24900.61 | -9.51  | -24881.02 | -14.49 |
| -25141.80 | -4.90 | -25093.31 | -5.57 | -25046.22 | -7.63 | -24999.92 | -10.50 | -24947.10 | -6.83  | -24902.01 | -10.90 | -24879.71 | -13.18 |
| -25142.17 | -5.26 | -25094.80 | -7.06 | -25046.38 | -7.79 | -24996.88 | -7.45  | -24949.66 | -9.39  | -24903.72 | -12.61 | -24875.66 | -9.13  |
| -25140.32 | -3.41 | -25093.58 | -5.84 | -25044.04 | -5.45 | -24993.83 | -4.41  | -24939.13 | 1.14   | -24903.72 | -12.61 | -24878.00 | -11.47 |
| -25141.51 | -4.60 | -25092.11 | -4.36 | -25046.06 | -7.47 | -24998.41 | -8.98  | -24950.80 | -10.53 | -24903.19 | -12.08 | -24876.93 | -10.40 |
| -25142.93 | -6.03 | -25094.36 | -6.62 | -25045.46 | -6.87 | -24997.90 | -8.48  | -24950.60 | -10.33 | -24902.08 | -10.97 | -24878.81 | -12.28 |
| -25142.77 | -5.87 | -25093.92 | -6.17 | -25046.11 | -7.52 | -24998.64 | -9.22  | -24952.41 | -12.14 | -24902.77 | -11.66 | -24880.21 | -13.68 |
| -25142.13 | -5.22 | -25094.39 | -6.65 | -25047.29 | -8.70 | -24995.33 | -5.90  | -24948.50 | -8.24  | -24905.07 | -13.96 | -24876.10 | -9.57  |
| -25142.48 | -5.58 | -25093.03 | -5.28 | -25043.22 | -4.63 | -24996.08 | -6.65  | -24946.59 | -6.32  | -24902.33 | -11.22 | -24879.43 | -12.90 |
| -25143.23 | -6.33 | -25091.76 | -4.01 | -25044.92 | -6.34 | -24998.83 | -9.40  | -24947.22 | -6.95  | -24902.77 | -11.66 | -24880.34 | -13.81 |
| -25142.98 | -6.08 | -25093.20 | -5.46 | -25046.29 | -7.71 | -24997.11 | -7.68  | -24950.54 | -10.27 | -24902.02 | -10.91 | -24879.11 | -12.58 |
| -25140.88 | -3.98 | -25092.97 | -5.22 | -25046.75 | -8.17 | -24996.45 | -7.02  | -24950.51 | -10.24 | -24900.93 | -9.82  | -24878.97 | -12.44 |

|           |       |           |       |           |       |           |        |           |        |           |        |           |        |
|-----------|-------|-----------|-------|-----------|-------|-----------|--------|-----------|--------|-----------|--------|-----------|--------|
| -25143.28 | -6.38 | -25092.39 | -4.64 | -25046.09 | -7.50 | -24997.70 | -8.27  | -24949.59 | -9.32  | -24901.01 | -9.90  | -24878.20 | -11.67 |
| -25142.36 | -5.46 | -25092.09 | -4.35 | -25045.93 | -7.34 | -25000.03 | -10.60 | -24948.17 | -7.91  | -24904.14 | -13.03 | -24879.27 | -12.74 |
| -25141.43 | -4.52 | -25094.75 | -7.00 | -25045.07 | -6.48 | -24999.37 | -9.95  | -24948.73 | -8.47  | -24901.90 | -10.79 | -24881.17 | -14.64 |
| -25143.17 | -6.27 | -25093.44 | -5.69 | -25044.45 | -5.86 | -24999.43 | -10.00 | -24946.18 | -5.91  | -24902.11 | -11.00 | -24878.03 | -11.50 |
| -25143.15 | -6.24 | -25095.46 | -7.71 | -25046.47 | -7.88 | -25000.98 | -11.56 | -24949.39 | -9.13  | -24904.99 | -13.88 | -24882.11 | -15.58 |
| -25142.06 | -5.16 | -25094.83 | -7.09 | -25047.24 | -8.66 | -24997.39 | -7.96  | -24948.50 | -8.23  | -24903.26 | -12.15 | -24879.05 | -12.52 |
| -25142.68 | -5.78 | -25092.63 | -4.89 | -25047.24 | -8.65 | -24996.05 | -6.62  | -24949.88 | -9.61  | -24905.47 | -14.36 | -24879.61 | -13.08 |
| -25141.30 | -4.39 | -25093.79 | -6.05 | -25047.32 | -8.73 | -24999.51 | -10.08 | -24948.71 | -8.44  | -24903.31 | -12.20 | -24879.60 | -13.07 |
| -25141.79 | -4.89 | -25094.39 | -6.65 | -25045.12 | -6.53 | -24995.92 | -6.50  | -24951.33 | -11.07 | -24904.12 | -13.01 | -24876.79 | -10.26 |
| -25142.46 | -5.56 | -25093.00 | -5.25 | -25046.36 | -7.77 | -24998.63 | -9.20  | -24947.26 | -6.99  | -24903.37 | -12.26 | -24881.08 | -14.55 |
| -25143.17 | -6.27 | -25092.44 | -4.70 | -25044.82 | -6.23 | -24998.19 | -8.76  | -24950.03 | -9.76  | -24902.80 | -11.69 | -24878.58 | -12.05 |
| -25141.70 | -4.80 | -25094.27 | -6.53 | -25045.51 | -6.93 | -24999.80 | -10.37 | -24949.82 | -9.55  | -24901.36 | -10.25 | -24880.15 | -13.62 |
| -25141.86 | -4.95 | -25091.64 | -3.89 | -25045.38 | -6.79 | -24993.62 | -4.19  | -24951.17 | -10.90 | -24900.44 | -9.33  | -24880.45 | -13.92 |
| -25141.11 | -4.21 | -25092.38 | -4.63 |           |       | -24996.09 | -6.66  |           |        | -24903.17 | -12.06 | -24877.67 | -11.14 |
| -25142.77 | -5.87 | -25094.09 | -6.35 |           |       | -24997.85 | -8.43  |           |        |           |        |           |        |

Average energies

|        |          |          |          |          |          |          |          |          |          |          |          |          |          |
|--------|----------|----------|----------|----------|----------|----------|----------|----------|----------|----------|----------|----------|----------|
| -25142 | -5.12868 | -25093.3 | -5.53109 | -25045.1 | -6.52057 | -24997.1 | -7.71147 | -24949.4 | -9.11791 | -24902.2 | -11.0813 | -24878.9 | -12.3743 |
|--------|----------|----------|----------|----------|----------|----------|----------|----------|----------|----------|----------|----------|----------|

## Th

|                                     | ground state energy | solid solution energy |       |           |       |           |       |           |        |           |        |           |        |
|-------------------------------------|---------------------|-----------------------|-------|-----------|-------|-----------|-------|-----------|--------|-----------|--------|-----------|--------|
| concentration in solid solution (%) | 3                   | 6                     |       | 9         |       | 12        |       | 15        |        | 18        |        | 21        |        |
| number of atoms                     | 2                   | 4                     |       | 6         |       | 8         |       | 10        |        | 12        |        | 13        |        |
| -25147.61                           | -5.08               | -25105.76             | -6.76 | -25062.48 | -7.00 | -25018.98 | -7.03 | -24977.11 | -8.69  | -24935.91 | -11.01 | -24913.56 | -10.43 |
| -25146.54                           | -4.01               | -25106.28             | -7.27 | -25061.96 | -6.48 | -25013.02 | -1.07 | -24975.06 | -6.64  | -24934.90 | -10.00 | -24912.88 | -9.75  |
| -25146.80                           | -4.27               | -25104.74             | -5.73 | -25063.33 | -7.85 | -25019.34 | -7.39 | -24978.51 | -10.09 | -24934.08 | -9.18  | -24913.99 | -10.86 |
| -25148.77                           | -6.24               | -25107.41             | -8.40 | -25060.73 | -5.25 | -25019.40 | -7.45 | -24976.64 | -8.21  | -24933.67 | -8.77  | -24917.56 | -14.44 |
| -25148.70                           | -6.16               | -25105.48             | -6.47 | -25061.50 | -6.03 | -25019.00 | -7.05 | -24976.29 | -7.87  | -24931.87 | -6.97  | -24914.75 | -11.62 |
| -25148.91                           | -6.38               | -25102.00             | -3.00 | -25062.75 | -7.27 | -25017.23 | -5.29 | -24979.06 | -10.64 | -24931.76 | -6.87  | -24911.53 | -8.40  |
| -25147.06                           | -4.53               | -25104.32             | -5.32 | -25063.04 | -7.57 | -25019.94 | -7.99 | -24978.09 | -9.67  | -24936.82 | -11.93 | -24916.33 | -13.20 |
| -25148.12                           | -5.59               | -25105.14             | -6.14 | -25059.85 | -4.37 | -25021.11 | -9.16 | -24979.79 | -11.37 | -24935.44 | -10.55 | -24914.23 | -11.10 |
| -25149.08                           | -6.54               | -25104.47             | -5.46 | -25063.42 | -7.95 | -25020.94 | -8.99 | -24975.42 | -7.00  | -24933.22 | -8.33  | -24912.83 | -9.70  |
| -25147.75                           | -5.22               | -25103.40             | -4.39 | -25062.96 | -7.48 | -25020.78 | -8.83 | -24975.46 | -7.04  | -24935.11 | -10.22 | -24913.11 | -9.98  |
| -25148.10                           | -5.56               | -25105.11             | -6.11 | -25063.29 | -7.82 | -25021.10 | -9.15 | -24977.29 | -8.87  | -24938.30 | -13.41 | -24914.49 | -11.37 |
| -25147.86                           | -5.33               | -25105.29             | -6.29 | -25062.32 | -6.84 | -25019.87 | -7.92 | -24979.41 | -10.99 | -24936.75 | -11.86 | -24913.30 | -10.17 |
| -25148.04                           | -5.51               | -25103.90             | -4.90 | -25060.18 | -4.70 | -25020.36 | -8.41 | -24975.49 | -7.07  | -24934.72 | -9.83  | -24914.22 | -11.09 |
| -25147.67                           | -5.14               | -25105.80             | -6.80 | -25062.39 | -6.91 | -25019.81 | -7.86 | -24976.95 | -8.53  | -24929.58 | -4.69  | -24915.55 | -12.42 |
| -25146.50                           | -3.97               | -25103.68             | -4.67 | -25059.68 | -4.20 | -25017.86 | -5.91 | -24977.27 | -8.85  | -24936.55 | -11.66 | -24910.17 | -7.04  |
| -25146.47                           | -3.94               | -25104.84             | -5.83 | -25063.77 | -8.29 | -25020.96 | -9.01 | -24978.82 | -10.40 | -24932.46 | -7.57  | -24916.61 | -13.48 |
| -25147.03                           | -4.50               | -25105.25             | -6.25 | -25058.44 | -2.96 | -25018.62 | -6.67 | -24978.34 | -9.92  | -24922.04 | 2.86   | -24917.52 | -14.39 |

|           |       |           |       |           |        |           |        |           |        |           |        |           |        |
|-----------|-------|-----------|-------|-----------|--------|-----------|--------|-----------|--------|-----------|--------|-----------|--------|
| -25146.59 | -4.05 | -25105.17 | -6.16 | -25063.26 | -7.78  | -25020.62 | -8.67  | -24975.35 | -6.93  | -24938.00 | -13.10 | -24916.34 | -13.21 |
| -25148.13 | -5.59 | -25107.64 | -8.64 | -25060.25 | -4.77  | -25019.25 | -7.30  | -24975.88 | -7.46  | -24934.65 | -9.76  | -24916.89 | -13.76 |
| -25147.20 | -4.67 | -25104.78 | -5.78 | -25060.96 | -5.48  | -25015.13 | -3.18  | -24979.47 | -11.05 | -24937.27 | -12.38 | -24913.11 | -9.98  |
| -25145.39 | -2.85 | -25103.83 | -4.83 | -25063.91 | -8.43  | -25018.62 | -6.67  | -24976.33 | -7.91  | -24934.56 | -9.67  | -24914.94 | -11.81 |
| -25148.14 | -5.60 | -25107.75 | -8.75 | -25064.26 | -8.79  | -25018.09 | -6.14  | -24976.45 | -8.03  | -24932.29 | -7.40  | -24912.44 | -9.31  |
| -25147.89 | -5.36 | -25105.94 | -6.93 | -25063.68 | -8.21  | -25020.03 | -8.08  | -24979.07 | -10.65 | -24938.70 | -13.80 | -24917.30 | -14.17 |
| -25147.47 | -4.94 | -25104.73 | -5.73 | -25062.73 | -7.25  | -25020.00 | -8.05  | -24978.56 | -10.14 | -24935.74 | -10.85 | -24915.98 | -12.85 |
| -25149.13 | -6.60 | -25106.05 | -7.05 | -25063.74 | -8.26  | -25017.93 | -5.98  | -24977.18 | -8.76  | -24932.87 | -7.98  | -24913.21 | -10.08 |
| -25148.05 | -5.51 | -25105.33 | -6.32 | -25064.00 | -8.53  | -25018.00 | -6.05  | -24976.80 | -8.38  | -24936.41 | -11.52 | -24915.83 | -12.70 |
| -25148.65 | -6.12 | -25104.95 | -5.94 | -25060.72 | -5.25  | -25017.50 | -5.55  | -24979.32 | -10.90 | -24934.83 | -9.94  | -24916.92 | -13.80 |
| -25148.91 | -6.38 | -25103.91 | -4.90 | -25062.41 | -6.94  | -25018.96 | -7.02  | -24979.63 | -11.21 | -24935.72 | -10.83 | -24913.52 | -10.39 |
| -25148.48 | -5.95 | -25104.49 | -5.48 | -25061.53 | -6.06  | -25021.21 | -9.26  | -24978.56 | -10.14 | -24936.16 | -11.27 | -24911.47 | -8.34  |
| -25148.36 | -5.83 | -25105.46 | -6.45 | -25063.49 | -8.01  | -25021.70 | -9.75  | -24974.82 | -6.40  | -24934.11 | -9.22  | -24905.70 | -2.57  |
| -25148.64 | -6.11 | -25105.82 | -6.82 | -25063.60 | -8.12  | -25020.36 | -8.41  | -24977.20 | -8.78  | -24936.95 | -12.06 | -24913.79 | -10.66 |
| -25148.96 | -6.43 | -25104.21 | -5.20 | -25063.74 | -8.26  | -25017.16 | -5.21  | -24979.23 | -10.81 | -24938.48 | -13.58 | -24917.52 | -14.40 |
| -25147.11 | -4.58 | -25104.73 | -5.72 | -25063.66 | -8.18  | -25022.23 | -10.28 | -24979.18 | -10.76 | -24935.59 | -10.69 | -24915.80 | -12.67 |
| -25147.18 | -4.64 | -25105.69 | -6.69 | -25061.98 | -6.50  | -25021.60 | -9.65  | -24978.57 | -10.15 | -24936.60 | -11.70 | -24914.99 | -11.86 |
| -25148.48 | -5.94 | -25105.21 | -6.20 | -25060.66 | -5.18  | -25020.52 | -8.57  | -24976.15 | -7.73  | -24936.90 | -12.01 | -24916.81 | -13.69 |
| -25148.17 | -5.64 | -25105.61 | -6.61 | -25061.62 | -6.14  | -25020.84 | -8.89  | -24978.98 | -10.56 | -24936.48 | -11.59 | -24916.45 | -13.33 |
| -25147.57 | -5.04 | -25103.59 | -4.59 | -25061.34 | -5.86  | -25020.82 | -8.88  | -24978.05 | -9.63  | -24932.17 | -7.28  | -24913.68 | -10.55 |
| -25149.40 | -6.86 | -25105.80 | -6.79 | -25065.22 | -9.74  | -25020.38 | -8.43  | -24976.07 | -7.65  | -24934.73 | -9.84  | -24916.12 | -12.99 |
| -25146.07 | -3.53 | -25104.08 | -5.08 | -25061.90 | -6.43  | -25011.97 | -0.02  | -24969.29 | -0.87  | -24938.22 | -13.33 | -24917.87 | -14.74 |
| -25148.83 | -6.30 | -25105.63 | -6.62 | -25059.08 | -3.60  | -25017.11 | -5.16  | -24976.95 | -8.53  | -24933.79 | -8.90  | -24916.52 | -13.39 |
| -25148.82 | -6.28 | -25105.68 | -6.68 | -25063.01 | -7.54  | -25019.06 | -7.11  | -24976.11 | -7.69  | -24937.62 | -12.72 | -24915.20 | -12.07 |
| -25146.98 | -4.44 | -25104.68 | -5.68 | -25062.37 | -6.90  | -25020.96 | -9.01  | -24971.59 | -3.17  | -24937.48 | -12.58 | -24915.12 | -11.99 |
| -25148.57 | -6.03 | -25103.56 | -4.55 | -25065.74 | -10.26 | -25017.91 | -5.96  | -24975.08 | -6.66  | -24934.64 | -9.75  | -24912.56 | -9.43  |
| -25148.56 | -6.03 | -25105.54 | -6.54 | -25060.92 | -5.44  | -25019.15 | -7.20  | -24978.40 | -9.98  | -24933.63 | -8.74  | -24916.36 | -13.23 |
| -25148.02 | -5.49 | -25103.53 | -4.52 | -25060.99 | -5.51  | -25019.33 | -7.38  | -24973.52 | -5.10  | -24936.26 | -11.37 | -24907.99 | -4.86  |
| -25147.88 | -5.34 | -25106.61 | -7.61 | -25062.67 | -7.19  | -25017.41 | -5.46  | -24978.68 | -10.26 | -24934.50 | -9.60  | -24916.87 | -13.74 |
| -25148.01 | -5.48 | -25104.67 | -5.66 | -25062.25 | -6.77  | -25019.98 | -8.03  | -24976.16 | -7.74  | -24935.20 | -10.31 | -24911.77 | -8.64  |
| -25149.22 | -6.69 | -25104.78 | -5.77 | -25062.55 | -7.07  | -25019.07 | -7.12  | -24978.68 | -10.26 | -24937.66 | -12.77 | -24914.20 | -11.07 |
| -25148.77 | -6.23 | -25102.42 | -3.42 | -25062.35 | -6.87  | -25017.81 | -5.86  | -24975.94 | -7.52  | -24936.09 | -11.20 | -24916.85 | -13.72 |
| -25146.75 | -4.21 | -25103.94 | -4.94 | -25060.52 | -5.04  | -25018.05 | -6.10  | -24978.51 | -10.09 | -24934.71 | -9.82  | -24914.75 | -11.62 |
| -25148.83 | -6.30 | -25104.56 | -5.55 | -25062.84 | -7.37  | -25018.38 | -6.43  | -24977.63 | -9.21  | -24934.05 | -9.16  | -24918.04 | -14.91 |
| -25148.34 | -5.81 | -25104.43 | -5.42 | -25062.05 | -6.57  | -25019.18 | -7.23  | -24978.63 | -10.21 | -24934.18 | -9.28  | -24917.36 | -14.23 |
| -25149.06 | -6.53 | -25103.66 | -4.66 | -25062.75 | -7.28  | -25020.57 | -8.62  | -24976.18 | -7.76  | -24938.24 | -13.35 | -24915.37 | -12.24 |
| -25149.36 | -6.82 | -25104.57 | -5.57 | -25063.73 | -8.25  | -25016.06 | -4.11  | -24979.86 | -11.44 | -24937.94 | -13.05 | -24909.16 | -6.03  |
| -25147.80 | -5.26 | -25106.51 | -7.50 | -25060.20 | -4.73  | -25014.08 | -2.13  | -24975.38 | -6.96  | -24933.91 | -9.02  | -24918.15 | -15.02 |
| -25148.24 | -5.71 | -25104.54 | -5.53 | -25062.56 | -7.08  | -25022.43 | -10.48 | -24979.15 | -10.73 | -24931.83 | -6.94  | -24915.69 | -12.56 |
| -25149.74 | -7.21 | -25104.79 | -5.79 | -25062.91 | -7.43  | -25019.11 | -7.17  | -24973.69 | -5.27  | -24935.45 | -10.55 | -24914.65 | -11.53 |
| -25148.86 | -6.32 | -25102.70 | -3.69 | -25059.95 | -4.47  | -25021.27 | -9.32  | -24975.47 | -7.05  | -24937.91 | -13.02 | -24913.87 | -10.74 |

|           |       |           |       |           |       |           |        |           |        |           |        |           |        |
|-----------|-------|-----------|-------|-----------|-------|-----------|--------|-----------|--------|-----------|--------|-----------|--------|
| -25148.45 | -5.92 | -25103.64 | -4.64 | -25061.37 | -5.89 | -25019.50 | -7.55  | -24979.12 | -10.70 | -24935.15 | -10.26 | -24915.90 | -12.77 |
| -25149.14 | -6.60 | -25107.12 | -8.12 | -25063.57 | -8.09 | -25015.51 | -3.56  | -24977.19 | -8.77  | -24932.97 | -8.08  | -24910.44 | -7.31  |
| -25147.15 | -4.62 | -25105.70 | -6.70 | -25061.32 | -5.85 | -25020.68 | -8.73  | -24981.67 | -13.25 | -24939.18 | -14.29 | -24912.93 | -9.80  |
| -25147.93 | -5.39 | -25105.29 | -6.28 | -25061.77 | -6.29 | -25014.32 | -2.37  | -24977.03 | -8.61  | -24936.55 | -11.66 | -24916.85 | -13.72 |
| -25147.88 | -5.34 | -25104.55 | -5.55 | -25060.03 | -4.56 | -25019.81 | -7.86  | -24976.52 | -8.10  | -24935.68 | -10.79 | -24915.31 | -12.18 |
| -25148.30 | -5.76 | -25105.00 | -6.00 | -25062.42 | -6.95 | -25019.12 | -7.17  | -24972.48 | -4.06  | -24932.35 | -7.45  | -24916.45 | -13.32 |
| -25148.23 | -5.70 | -25104.21 | -5.21 | -25060.88 | -5.40 | -25021.01 | -9.06  | -24977.96 | -9.54  | -24934.34 | -9.44  | -24911.38 | -8.26  |
| -25148.70 | -6.16 | -25106.01 | -7.01 | -25061.40 | -5.92 | -25018.72 | -6.77  | -24977.44 | -9.02  | -24932.55 | -7.65  | -24913.09 | -9.96  |
| -25148.39 | -5.86 | -25105.44 | -6.44 | -25063.26 | -7.79 | -25013.30 | -1.35  | -24972.42 | -3.99  | -24935.41 | -10.51 | -24916.23 | -13.10 |
| -25148.73 | -6.19 | -25103.95 | -4.94 | -25062.00 | -6.52 | -25019.89 | -7.94  | -24978.23 | -9.81  | -24931.38 | -6.48  | -24913.62 | -10.49 |
| -25148.18 | -5.64 | -25106.27 | -7.26 | -25062.87 | -7.40 | -25016.70 | -4.76  | -24978.51 | -10.09 | -24937.32 | -12.42 | -24917.13 | -14.00 |
| -25147.46 | -4.93 | -25105.78 | -6.77 | -25062.18 | -6.71 | -25020.72 | -8.77  | -24975.76 | -7.34  | -24936.30 | -11.41 | -24915.45 | -12.32 |
| -25147.90 | -5.37 | -25105.45 | -6.44 | -25061.26 | -5.78 | -25021.16 | -9.21  | -24977.93 | -9.51  | -24932.33 | -7.44  | -24915.73 | -12.60 |
| -25147.21 | -4.68 | -25104.46 | -5.45 | -25062.03 | -6.55 | -25022.85 | -10.90 | -24977.01 | -8.59  | -24937.76 | -12.87 | -24911.86 | -8.73  |
| -25147.48 | -4.95 | -25102.98 | -3.98 | -25062.26 | -6.78 | -25018.85 | -6.90  | -24976.96 | -8.54  | -24932.91 | -8.02  | -24916.49 | -13.37 |
| -25147.91 | -5.38 | -25104.66 | -5.66 | -25062.54 | -7.07 | -25019.31 | -7.36  | -24970.90 | -2.48  | -24936.10 | -11.21 | -24915.63 | -12.51 |
| -25147.62 | -5.09 | -25104.80 | -5.79 | -25059.92 | -4.44 | -25018.77 | -6.82  | -24975.35 | -6.93  | -24938.10 | -13.21 | -24914.16 | -11.03 |
| -25146.23 | -3.69 | -25104.00 | -5.00 | -25062.13 | -6.65 | -25018.19 | -6.24  | -24978.25 | -9.83  | -24930.25 | -5.36  | -24914.68 | -11.55 |
| -25147.75 | -5.22 | -25106.05 | -7.05 | -25061.02 | -5.54 | -25019.56 | -7.61  | -24976.08 | -7.66  | -24933.67 | -8.78  | -24915.87 | -12.74 |
| -25148.40 | -5.86 | -25106.04 | -7.04 | -25062.46 | -6.98 | -25018.30 | -6.35  | -24979.71 | -11.29 | -24932.01 | -7.11  | -24917.62 | -14.49 |
| -25146.77 | -4.24 | -25105.79 | -6.78 | -25059.29 | -3.81 | -25019.19 | -7.24  | -24970.40 | -1.98  | -24932.09 | -7.20  | -24912.55 | -9.42  |
| -25147.25 | -4.72 | -25105.00 | -5.99 | -25059.26 | -3.79 | -25017.94 | -5.99  | -24977.33 | -8.91  | -24933.31 | -8.42  | -24914.57 | -11.44 |
| -25148.27 | -5.73 | -25103.52 | -4.52 | -25063.31 | -7.84 | -25019.78 | -7.83  | -24975.88 | -7.46  | -24935.07 | -10.18 | -24911.05 | -7.92  |
| -25147.72 | -5.18 | -25104.79 | -5.79 | -25063.01 | -7.53 | -25019.51 | -7.56  | -24977.31 | -8.89  | -24933.61 | -8.72  | -24915.32 | -12.19 |
| -25147.85 | -5.32 | -25103.88 | -4.87 | -25061.36 | -5.88 | -25020.58 | -8.63  | -24977.19 | -8.77  | -24936.23 | -11.34 | -24916.86 | -13.73 |
| -25147.50 | -4.97 | -25105.46 | -6.46 | -25063.96 | -8.48 | -25019.59 | -7.64  | -24978.29 | -9.87  | -24935.97 | -11.07 | -24915.63 | -12.50 |
| -25148.22 | -5.68 | -25101.64 | -2.64 | -25062.55 | -7.07 | -25018.18 | -6.23  | -24979.09 | -10.67 | -24938.36 | -13.47 | -24913.96 | -10.83 |
| -25148.45 | -5.91 | -25108.01 | -9.00 | -25064.89 | -9.41 | -25020.11 | -8.16  | -24980.54 | -12.12 | -24936.57 | -11.68 | -24915.04 | -11.91 |
| -25147.87 | -5.34 | -25103.93 | -4.93 | -25063.02 | -7.54 | -25019.66 | -7.71  | -24980.43 | -12.01 | -24934.10 | -9.21  | -24913.16 | -10.03 |
| -25148.77 | -6.23 | -25101.85 | -2.84 | -25063.68 | -8.20 | -25017.02 | -5.07  | -24972.48 | -4.06  | -24938.86 | -13.97 | -24911.40 | -8.27  |
| -25146.64 | -4.11 | -25106.30 | -7.30 | -25060.92 | -5.44 | -25020.11 | -8.16  | -24975.11 | -6.69  | -24932.77 | -7.88  | -24914.44 | -11.31 |
| -25148.27 | -5.74 | -25105.37 | -6.36 | -25062.99 | -7.51 | -25018.25 | -6.30  | -24975.63 | -7.21  | -24933.60 | -8.70  | -24914.34 | -11.21 |
| -25148.22 | -5.68 | -25105.53 | -6.52 | -25061.40 | -5.92 | -25023.47 | -11.52 | -24975.91 | -7.49  | -24932.60 | -7.71  | -24915.70 | -12.57 |
| -25147.24 | -4.71 | -25106.34 | -7.34 | -25059.85 | -4.37 | -25017.73 | -5.78  | -24977.82 | -9.40  | -24935.46 | -10.57 | -24916.16 | -13.03 |
| -25147.00 | -4.47 | -25104.10 | -5.09 | -25062.74 | -7.26 | -25022.22 | -10.27 | -24976.58 | -8.16  | -24937.61 | -12.72 | -24915.38 | -12.25 |
| -25149.39 | -6.85 | -25103.27 | -4.26 | -25060.81 | -5.33 | -25019.28 | -7.33  | -24976.84 | -8.42  | -24937.67 | -12.77 | -24912.87 | -9.74  |
| -25148.15 | -5.62 | -25105.62 | -6.61 | -25062.69 | -7.21 | -25021.12 | -9.17  | -24971.62 | -3.20  | -24931.06 | -6.17  | -24911.42 | -8.29  |
| -25147.61 | -5.07 | -25105.55 | -6.54 | -25061.35 | -5.87 | -25019.14 | -7.19  | -24980.74 | -12.32 | -24932.32 | -7.43  | -24914.67 | -11.55 |
| -25148.44 | -5.90 | -25101.94 | -2.94 | -25061.93 | -6.46 | -25021.63 | -9.68  | -24975.77 | -7.35  | -24936.89 | -11.99 | -24916.07 | -12.94 |
| -25147.53 | -5.00 | -25105.35 | -6.35 | -25061.22 | -5.74 | -25020.61 | -8.66  | -24977.65 | -9.23  | -24937.27 | -12.38 | -24916.37 | -13.24 |
| -25148.83 | -6.30 | -25103.68 | -4.67 | -25064.61 | -9.13 | -25020.58 | -8.63  | -24974.16 | -5.74  | -24938.21 | -13.32 | -24916.32 | -13.19 |



|                  |           |           |           |           |           |           |           |           |           |           |           |           |           |        |
|------------------|-----------|-----------|-----------|-----------|-----------|-----------|-----------|-----------|-----------|-----------|-----------|-----------|-----------|--------|
| -25147.21        | -4.68     | -25103.12 | -4.12     | -25061.50 | -6.02     | -25018.55 | -6.60     | -24978.80 | -10.38    | -24934.25 | -9.36     | -24917.13 | -14.01    |        |
| -25147.73        | -5.20     | -25101.65 | -2.65     | -25061.35 | -5.87     | -25019.16 | -7.22     | -24975.29 | -6.87     | -24934.54 | -9.65     | -24914.87 | -11.75    |        |
| -25147.55        | -5.01     | -25105.81 | -6.81     | -25062.80 | -7.32     | -25023.26 | -11.31    | -24980.51 | -12.09    | -24936.29 | -11.40    | -24916.27 | -13.14    |        |
| -25146.22        | -3.68     | -25105.89 | -6.89     | -25062.17 | -6.70     | -25019.50 | -7.55     | -24973.67 | -5.25     | -24936.98 | -12.09    | -24917.57 | -14.45    |        |
| -25148.56        | -6.03     | -25103.12 | -4.12     | -25063.53 | -8.05     | -25019.18 | -7.23     | -24974.23 | -5.81     | -24937.26 | -12.37    | -24912.64 | -9.51     |        |
| -25148.12        | -5.58     | -25106.45 | -7.44     | -25064.75 | -9.28     | -25019.42 | -7.47     | -24976.22 | -7.80     | -24933.61 | -8.72     | -24912.09 | -8.96     |        |
| -25146.87        | -4.34     | -25105.24 | -6.23     | -25065.04 | -9.56     | -25018.32 | -6.37     | -24933.21 | 35.21     | -24915.36 | 9.53      | -24914.41 | -11.28    |        |
| -25148.92        | -6.39     | -25107.36 | -8.35     | -25063.73 | -8.26     | -25018.83 | -6.88     | -24978.12 | -9.70     | -24939.17 | -14.28    | -24915.30 | -12.17    |        |
| -25148.33        | -5.80     | -25105.04 | -6.03     | -25059.85 | -4.37     | -25019.80 | -7.85     | -24976.02 | -7.60     | -24934.60 | -9.70     | -24917.17 | -14.04    |        |
| -25149.04        | -6.51     | -25104.71 | -5.71     | -25064.28 | -8.80     | -25016.15 | -4.20     | -24978.04 | -9.62     | -24935.31 | -10.41    | -24913.77 | -10.64    |        |
| -25148.46        | -5.92     | -25105.01 | -6.00     | -25060.72 | -5.24     | -25017.93 | -5.98     | -24977.07 | -8.65     | -24934.26 | -9.36     | -24913.30 | -10.17    |        |
| -25147.70        | -5.17     | -25104.05 | -5.04     | -25058.98 | -3.51     | -25015.69 | -3.74     | -24976.85 | -8.43     | -24931.50 | -6.61     | -24911.58 | -8.45     |        |
| -25148.88        | -6.34     | -25105.76 | -6.76     | -25063.49 | -8.01     | -25019.58 | -7.63     | -24979.44 | -11.02    | -24935.38 | -10.48    | -24915.07 | -11.94    |        |
| -25147.73        | -5.20     | -25105.83 | -6.83     | -25062.17 | -6.70     | -25018.57 | -6.63     | -24976.94 | -8.52     | -24938.04 | -13.15    | -24910.70 | -7.57     |        |
| -25147.67        | -5.13     | -25104.38 | -5.37     | -25061.41 | -5.93     | -25017.30 | -5.35     | -24978.71 | -10.29    | -24937.51 | -12.62    | -24918.43 | -15.30    |        |
| -25145.98        | -3.45     | -25104.64 | -5.63     | -25064.93 | -9.45     | -25020.85 | -8.90     | -24977.80 | -9.38     | -24936.18 | -11.28    | -24916.25 | -13.12    |        |
| -25149.19        | -6.66     | -25102.80 | -3.79     | -25063.70 | -8.23     | -25021.29 | -9.34     | -24975.31 | -6.89     | -24934.50 | -9.60     | -24907.96 | -4.83     |        |
| -25148.28        | -5.75     | -25107.36 | -8.36     | -25059.10 | -3.63     | -25020.40 | -8.45     | -24979.10 | -10.68    | -24937.51 | -12.61    | -24916.51 | -13.39    |        |
| -25148.10        | -5.57     | -25104.10 | -5.10     | -25064.68 | -9.20     | -25021.45 | -9.50     | -24978.40 | -9.98     | -24934.40 | -9.51     | -24914.49 | -11.36    |        |
| -25145.67        | -3.13     | -25104.51 | -5.51     |           |           | -25021.62 | -9.67     | -24978.42 | -10.00    | -24934.91 | -10.02    | -24914.89 | -11.76    |        |
|                  |           |           |           |           |           |           |           | -24974.20 |           | -5.78     | -24936.69 | -11.80    |           |        |
| Average energies | -25147.96 | -5.42     | -25104.87 | -5.87     | -25062.20 | -6.73     | -25019.22 | -7.27     | -24976.59 | -8.17     | -24934.97 | -10.07    | -24914.62 | -11.50 |

## U

|                                     | ground state energy | solid solution energy |           |       |           |       |           |        |           |        |           |        |           |        |
|-------------------------------------|---------------------|-----------------------|-----------|-------|-----------|-------|-----------|--------|-----------|--------|-----------|--------|-----------|--------|
| concentration in solid solution (%) | 3                   | 6                     | 9         | 12    | 15        | 18    | 21        |        |           |        |           |        |           |        |
| number of atoms                     | 2                   | 4                     | 6         | 8     | 10        | 12    | 13        |        |           |        |           |        |           |        |
|                                     | -25152.86           | -5.31                 | -25115.35 | -6.31 | -25073.83 | -3.29 | -25040.69 | -8.66  | -25003.89 | -10.38 | -24964.73 | -9.73  | -24945.18 | -9.43  |
|                                     | -25153.63           | -6.07                 | -25109.33 | -0.29 | -25075.82 | -5.29 | -25041.65 | -9.62  | -25000.78 | -7.27  | -24965.01 | -10.00 | -24946.86 | -11.11 |
|                                     | -25151.90           | -4.35                 | -25110.96 | -1.92 | -25077.90 | -7.36 | -25039.49 | -7.47  | -25005.56 | -12.05 | -24967.26 | -12.26 | -24948.06 | -12.31 |
|                                     | -25152.42           | -4.87                 | -25113.61 | -4.56 | -25078.10 | -7.56 | -25042.38 | -10.36 | -25004.13 | -10.62 | -24963.67 | -8.66  | -24951.36 | -15.62 |
|                                     | -25151.75           | -4.20                 | -25116.40 | -7.35 | -25074.07 | -3.54 | -25037.25 | -5.22  | -25004.34 | -10.82 | -24966.02 | -11.02 | -24949.08 | -13.33 |
|                                     | -25152.54           | -4.99                 | -25115.09 | -6.05 | -25074.48 | -3.95 | -25040.45 | -8.42  | -25002.67 | -9.16  | -24966.09 | -11.09 | -24949.65 | -13.90 |
|                                     | -25152.69           | -5.14                 | -25114.66 | -5.62 | -25077.87 | -7.34 | -25036.61 | -4.59  | -25001.84 | -8.33  | -24968.51 | -13.50 | -24947.90 | -12.15 |
|                                     | -25152.58           | -5.03                 | -25114.40 | -5.36 | -25078.47 | -7.93 | -25042.19 | -10.17 | -25004.61 | -11.09 | -24963.02 | -8.02  | -24947.18 | -11.43 |
|                                     | -25152.31           | -4.76                 | -25109.99 | -0.94 | -25078.21 | -7.68 | -25040.71 | -8.69  | -25002.40 | -8.88  | -24969.97 | -14.96 | -24948.01 | -12.26 |
|                                     | -25152.71           | -5.16                 | -25114.36 | -5.32 | -25075.70 | -5.17 | -25036.70 | -4.67  | -25002.41 | -8.90  | -24966.52 | -11.51 | -24949.66 | -13.91 |
|                                     | -25152.36           | -4.81                 | -25115.36 | -6.32 | -25079.46 | -8.92 | -25039.96 | -7.94  | -25002.14 | -8.62  | -24964.51 | -9.50  | -24946.01 | -10.26 |

|           |       |           |        |           |       |           |        |           |        |           |        |           |        |
|-----------|-------|-----------|--------|-----------|-------|-----------|--------|-----------|--------|-----------|--------|-----------|--------|
| -25152.23 | -4.68 | -25113.80 | -4.75  | -25075.45 | -4.92 | -25038.53 | -6.50  | -25002.84 | -9.32  | -24964.79 | -9.79  | -24943.87 | -8.12  |
| -25153.05 | -5.50 | -25116.30 | -7.26  | -25075.45 | -4.91 | -25038.89 | -6.87  | -25001.03 | -7.52  | -24965.61 | -10.61 | -24951.13 | -15.38 |
| -25151.68 | -4.13 | -25113.82 | -4.78  | -25077.73 | -7.19 | -25039.85 | -7.83  | -25002.48 | -8.97  | -24967.14 | -12.14 | -24950.93 | -15.18 |
| -25151.10 | -3.55 | -25112.52 | -3.48  | -25075.39 | -4.85 | -25041.70 | -9.68  | -24999.02 | -5.51  | -24967.89 | -12.89 | -24948.16 | -12.41 |
| -25151.54 | -3.99 | -25115.15 | -6.11  | -25078.90 | -8.37 | -25038.60 | -6.57  | -24999.11 | -5.60  | -24964.90 | -9.90  | -24947.33 | -11.58 |
| -25152.91 | -5.35 | -25114.21 | -5.16  | -25075.12 | -4.59 | -25041.52 | -9.50  | -25004.37 | -10.86 | -24963.54 | -8.53  | -24951.26 | -15.51 |
| -25152.45 | -4.90 | -25115.50 | -6.46  | -25079.49 | -8.96 | -25041.96 | -9.93  | -25002.40 | -8.89  | -24965.97 | -10.96 | -24947.44 | -11.69 |
| -25152.04 | -4.49 | -25112.37 | -3.33  | -25077.94 | -7.40 | -25039.47 | -7.44  | -25003.14 | -9.62  | -24965.01 | -10.01 | -24946.84 | -11.09 |
| -25153.31 | -5.76 | -25114.19 | -5.15  | -25078.57 | -8.04 | -25041.12 | -9.09  | -25001.36 | -7.84  | -24964.32 | -9.31  | -24942.80 | -7.05  |
| -25152.54 | -4.98 | -25113.00 | -3.95  | -25075.95 | -5.42 | -25036.26 | -4.23  | -25006.34 | -12.83 | -24967.33 | -12.32 | -24947.82 | -12.07 |
| -25151.87 | -4.32 | -25113.05 | -4.00  | -25077.62 | -7.09 | -25040.31 | -8.29  | -24997.48 | -3.97  | -24966.30 | -11.30 | -24947.62 | -11.87 |
| -25151.97 | -4.41 | -25139.05 | -30.01 | -25078.42 | -7.88 | -25038.47 | -6.45  | -25003.39 | -9.88  | -24964.39 | -9.38  | -24951.27 | -15.52 |
| -25150.25 | -2.70 | -25114.57 | -5.53  | -25078.80 | -8.26 | -25041.43 | -9.41  | -25002.03 | -8.51  | -24968.78 | -13.78 | -24949.77 | -14.02 |
| -25152.28 | -4.73 | -25112.18 | -3.14  | -25075.30 | -4.76 | -25042.15 | -10.13 | -25002.08 | -8.51  | -24964.29 | -9.29  | -24946.58 | -10.83 |
| -25152.85 | -5.29 | -25115.54 | -6.49  | -25077.14 | -6.60 | -25038.52 | -6.50  | -25002.82 | -9.30  | -24966.89 | -11.89 | -24948.65 | -12.90 |
| -25151.69 | -4.13 | -25113.62 | -4.58  | -25076.42 | -5.88 | -25039.09 | -7.06  | -25004.63 | -11.12 | -24965.57 | -10.57 | -24944.88 | -9.13  |
| -25152.89 | -5.34 | -25113.71 | -4.67  | -25076.38 | -5.85 | -25037.65 | -5.62  | -24998.81 | -5.30  | -24966.37 | -11.37 | -24948.62 | -12.87 |
| -25153.58 | -6.02 | -25116.22 | -7.18  | -25077.20 | -6.67 | -25041.89 | -9.86  | -25001.33 | -7.81  | -24961.68 | -6.68  | -24944.17 | -8.42  |
| -25151.21 | -3.65 | -25113.03 | -3.99  | -25077.74 | -7.21 | -25041.20 | -9.18  | -25006.11 | -12.60 | -24966.63 | -11.63 | -24949.85 | -14.10 |
| -25152.59 | -5.04 | -25115.28 | -6.24  | -25078.77 | -8.23 | -25042.95 | -10.93 | -25005.08 | -11.57 | -24965.00 | -10.00 | -24949.93 | -14.18 |
| -25152.47 | -4.92 | -25115.12 | -6.08  | -25078.36 | -7.83 | -25043.58 | -11.56 | -25004.51 | -11.00 | -24964.31 | -9.31  | -24946.21 | -10.46 |
| -25152.62 | -5.07 | -25114.65 | -5.61  | -25076.81 | -6.28 | -25042.35 | -10.32 | -25005.49 | -11.98 | -24969.23 | -14.22 | -25024.06 | -88.31 |
| -25153.04 | -5.49 | -25113.38 | -4.34  | -25074.15 | -3.62 | -25040.00 | -7.97  | -25003.45 | -9.93  | -24963.64 | -8.63  | -24950.88 | -15.13 |
| -25151.55 | -4.00 | -25114.66 | -5.62  | -25074.31 | -3.77 | -25037.72 | -5.70  | -25002.27 | -8.75  | -24967.13 | -12.13 | -24951.45 | -15.70 |
| -25146.52 | 1.03  | -25114.54 | -5.50  | -25076.62 | -6.09 | -25042.20 | -10.17 | -25004.41 | -10.90 | -24969.52 | -14.52 | -24950.08 | -14.33 |
| -25150.78 | -3.22 | -25113.84 | -4.79  | -25077.96 | -7.42 | -25043.15 | -11.13 | -25003.92 | -10.41 | -24943.32 | 11.69  | -24948.00 | -12.25 |
| -25152.83 | -5.28 | -25114.33 | -5.29  | -25078.07 | -7.54 | -25040.41 | -8.39  | -25003.48 | -9.97  | -24968.88 | -13.88 | -24950.97 | -15.22 |
| -25151.72 | -4.16 | -25108.73 | 0.31   | -25077.00 | -6.46 | -25039.51 | -7.49  | -25004.11 | -10.59 | -24966.28 | -11.27 | -24946.62 | -10.87 |
| -25151.75 | -4.20 | -25113.88 | -4.84  | -25077.98 | -7.45 | -25040.56 | -8.53  | -25005.83 | -12.32 | -24966.37 | -11.36 | -24947.87 | -12.12 |
| -25153.30 | -5.75 | -25113.96 | -4.91  | -25076.00 | -5.47 | -25040.17 | -8.14  | -25005.29 | -11.78 | -24962.90 | -7.90  | -24948.61 | -12.86 |
| -25153.11 | -5.56 | -25115.65 | -6.61  | -25077.49 | -6.95 | -25038.90 | -6.87  | -25004.10 | -10.59 | -24967.67 | -12.67 | -24948.60 | -12.85 |
| -25151.49 | -3.94 | -25114.52 | -5.48  | -25076.95 | -6.42 | -25039.24 | -7.21  | -25001.40 | -7.89  | -24965.52 | -10.52 | -24947.65 | -11.90 |
| -25151.56 | -4.01 | -25113.41 | -4.36  | -25078.96 | -8.43 | -25039.75 | -7.72  | -25005.13 | -11.62 | -24966.85 | -11.85 | -24950.38 | -14.63 |
| -25153.46 | -5.91 | -25116.10 | -7.06  | -25077.27 | -6.74 | -25042.61 | -10.58 | -25003.29 | -9.77  | -24966.72 | -11.72 | -24950.07 | -14.32 |
| -25152.46 | -4.90 | -25115.87 | -6.83  | -25078.10 | -7.57 | -25038.76 | -6.73  | -25003.51 | -10.00 | -24966.84 | -11.84 | -24949.72 | -13.97 |
| -25151.51 | -3.96 | -25115.32 | -6.28  | -25077.97 | -7.43 | -25041.61 | -9.58  | -24998.57 | -5.06  | -24967.18 | -12.17 | -24949.31 | -13.56 |
| -25152.13 | -4.58 | -25115.39 | -6.35  | -25078.68 | -8.14 | -25039.28 | -7.26  | -25002.12 | -8.60  | -24963.27 | -8.27  | -24947.75 | -12.00 |
| -25152.51 | -4.96 | -25114.56 | -5.52  | -25077.70 | -7.17 | -25038.68 | -6.66  | -25003.41 | -9.90  | -24966.19 | -11.18 | -24948.90 | -13.15 |
| -25152.16 | -4.61 | -25115.49 | -6.45  | -25076.68 | -6.15 | -25039.44 | -7.41  | -25001.65 | -8.13  | -24967.15 | -12.14 | -24946.90 | -11.15 |
| -25150.00 | -2.45 | -25114.22 | -5.18  | -25079.00 | -8.46 | -25039.35 | -7.33  | -25002.63 | -9.11  | -24960.69 | -5.69  | -24943.26 | -7.52  |
| -25151.68 | -4.12 | -25115.91 | -6.86  | -25078.38 | -7.85 | -25040.35 | -8.32  | -25002.02 | -8.50  | -24964.79 | -9.79  | -24950.44 | -14.69 |

|           |       |           |       |           |        |           |        |           |        |           |        |           |        |
|-----------|-------|-----------|-------|-----------|--------|-----------|--------|-----------|--------|-----------|--------|-----------|--------|
| -25151.91 | -4.35 | -25114.56 | -5.51 | -25078.90 | -8.37  | -25040.17 | -8.14  | -25005.23 | -11.72 | -24966.23 | -11.22 | -24949.07 | -13.32 |
| -25152.64 | -5.09 | -25115.58 | -6.54 | -25075.83 | -5.30  | -25037.57 | -5.55  | -25000.90 | -7.39  | -24963.64 | -8.64  | -24947.64 | -11.89 |
| -25152.33 | -4.78 | -25115.38 | -6.34 | -25078.56 | -8.03  | -25042.48 | -10.45 | -25002.50 | -8.98  | -24964.69 | -9.69  | -24947.94 | -12.19 |
| -25152.08 | -4.53 | -25113.44 | -4.40 | -25076.65 | -6.11  | -25039.13 | -7.11  | -25000.94 | -7.43  | -24964.12 | -9.12  | -24949.96 | -14.21 |
| -25147.23 | 0.33  | -25114.36 | -5.31 | -25077.41 | -6.88  | -25036.07 | -4.05  | -25003.39 | -9.87  | -24964.42 | -9.42  | -24947.59 | -11.84 |
| -25152.61 | -5.06 | -25112.68 | -3.63 | -25078.84 | -8.31  | -25040.54 | -8.52  | -25005.52 | -12.01 | -24968.09 | -13.09 | -24950.35 | -14.60 |
| -25153.28 | -5.72 | -25112.94 | -3.90 | -25079.88 | -9.35  | -25040.20 | -8.18  | -25007.44 | -13.93 | -24966.97 | -11.96 | -24946.01 | -10.26 |
| -25151.15 | -3.60 | -25116.32 | -7.28 | -25076.94 | -6.41  | -25041.04 | -9.02  | -25005.51 | -11.99 | -24964.76 | -9.75  | -25023.22 | -87.47 |
| -25152.28 | -4.73 | -25114.32 | -5.27 | -25077.18 | -6.65  | -25039.69 | -7.67  | -25000.37 | -6.85  | -24965.49 | -10.48 | -24948.83 | -13.08 |
| -25147.03 | 0.52  | -25116.34 | -7.30 | -25077.41 | -6.88  | -25038.56 | -6.54  | -25005.89 | -12.37 | -24961.91 | -6.90  | -24946.65 | -10.90 |
| -25149.71 | -2.16 | -25112.50 | -3.46 | -25075.02 | -4.48  | -25040.08 | -8.06  | -25004.98 | -11.46 | -24960.59 | -5.59  | -24944.60 | -8.85  |
| -25151.34 | -3.78 | -25114.21 | -5.17 | -25076.80 | -6.27  | -25041.78 | -9.76  | -25002.08 | -8.56  | -24965.90 | -10.89 | -24951.98 | -16.23 |
| -25153.84 | -6.29 | -25114.64 | -5.60 | -25077.55 | -7.02  | -25037.55 | -5.53  | -25003.43 | -9.91  | -24961.58 | -6.58  | -24945.40 | -9.65  |
| -25151.97 | -4.42 | -25115.25 | -6.21 | -25077.31 | -6.78  | -25039.46 | -7.44  | -25000.70 | -7.18  | -24969.72 | -14.71 | -24951.44 | -15.69 |
| -25151.01 | -3.46 | -25116.06 | -7.02 | -25074.94 | -4.41  | -25037.35 | -5.33  | -25004.18 | -10.67 | -24965.07 | -10.06 | -24950.17 | -14.42 |
| -25150.73 | -3.18 | -25114.34 | -5.30 | -25078.93 | -8.39  | -25041.90 | -9.87  | -25003.38 | -9.86  | -24967.55 | -12.54 | -24948.78 | -13.03 |
| -25151.85 | -4.30 | -25114.76 | -5.71 | -25080.76 | -10.23 | -25040.03 | -8.01  | -24996.52 | -3.01  | -24965.13 | -10.13 | -24950.31 | -14.56 |
| -25152.30 | -4.74 | -25112.67 | -3.63 | -25079.65 | -9.11  | -25041.61 | -9.59  | -24999.05 | -5.53  | -24969.64 | -14.64 | -24947.27 | -11.52 |
| -25151.99 | -4.44 | -25115.44 | -6.40 |           |        | -25037.53 | -5.51  | -25005.32 | -11.81 | -24969.54 | -14.54 | -24947.87 | -12.13 |
| -25152.90 | -5.35 | -25113.77 | -4.73 |           |        | -25040.81 | -8.78  | -25005.47 | -11.96 | -24964.89 | -9.89  | -24951.44 | -15.69 |
| -25152.16 | -4.61 | -25115.38 | -6.34 |           |        | -25037.44 | -5.41  | -24998.74 | -5.23  | -24968.21 | -13.20 | -24948.60 | -12.85 |
| -25153.15 | -5.60 | -25113.42 | -4.38 |           |        | -25038.62 | -6.60  | -25004.14 | -10.62 | -24962.02 | -7.01  | -24949.81 | -14.06 |
| -25153.26 | -5.71 | -25116.08 | -7.04 |           |        | -25040.73 | -8.71  | -25005.67 | -12.16 | -24967.70 | -12.69 | -24948.62 | -12.87 |
| -25152.02 | -4.47 | -25114.12 | -5.08 |           |        | -25041.34 | -9.32  | -25005.68 | -12.17 | -24964.18 | -9.18  | -24944.95 | -9.20  |
| -25152.20 | -4.65 | -25115.23 | -6.19 |           |        | -25041.31 | -9.29  | -25002.54 | -9.03  | -24966.57 | -11.57 | -24946.46 | -10.71 |
| -25151.99 | -4.44 | -25115.80 | -6.76 |           |        | -25038.70 | -6.68  | -25004.79 | -11.27 | -24962.03 | -7.03  | -24944.58 | -8.83  |
| -25153.04 | -5.49 | -25113.76 | -4.72 |           |        | -25039.08 | -7.05  | -25003.78 | -10.27 | -24966.96 | -11.95 | -24948.68 | -12.93 |
| -25151.65 | -4.10 | -25114.76 | -5.72 |           |        | -25037.78 | -5.76  | -25001.89 | -8.37  | -24966.99 | -11.99 | -24947.19 | -11.44 |
| -25152.27 | -4.72 |           |       |           |        | -25042.27 | -10.25 | -25004.81 | -11.30 | -24967.53 | -12.52 | -24946.40 | -10.65 |
| -25151.98 | -4.43 |           |       |           |        | -25037.77 | -5.75  | -25002.18 | -8.67  | -24967.44 | -12.43 | -24941.67 | -5.92  |
| -25151.01 | -3.46 |           |       |           |        | -25038.48 | -6.46  | -25001.09 | -7.58  | -24968.65 | -13.64 | -24946.40 | -10.65 |
| -25152.99 | -5.44 |           |       |           |        | -25038.46 | -6.44  | -25004.77 | -11.26 | -24964.37 | -9.37  | -24945.59 | -9.84  |
| -25151.97 | -4.42 |           |       |           |        | -25038.12 | -6.09  | -25003.53 | -10.02 | -24966.18 | -11.17 | -24944.71 | -8.96  |
| -25152.78 | -5.23 |           |       |           |        | -25041.07 | -9.04  | -25004.76 | -11.24 | -24966.67 | -11.67 | -24949.08 | -13.33 |
| -25151.94 | -4.39 |           |       |           |        | -25033.87 | -1.84  | -25004.24 | -10.73 | -24962.75 | -7.74  | -24942.80 | -7.05  |
| -25153.48 | -5.93 |           |       |           |        | -25039.12 | -7.09  | -25005.71 | -12.19 | -24963.15 | -8.14  | -24947.03 | -11.28 |
| -25153.22 | -5.67 |           |       |           |        | -25039.00 | -6.98  | -25001.82 | -8.31  | -24956.32 | -1.32  | -24950.95 | -15.20 |
| -25151.56 | -4.01 |           |       |           |        | -25037.74 | -5.71  | -25001.73 | -8.21  | -24965.18 | -10.18 | -24942.84 | -7.09  |
| -25153.32 | -5.77 |           |       |           |        | -25040.92 | -8.89  | -25004.98 | -11.46 | -24964.11 | -9.11  | -24949.91 | -14.16 |
| -25153.01 | -5.46 |           |       |           |        |           |        |           |        | -24966.83 | -11.82 | -24951.21 | -15.46 |
|           |       |           |       |           |        |           |        |           |        | -24966.57 | -11.56 | -24947.52 | -11.77 |

|           |          |           |          |
|-----------|----------|-----------|----------|
| -24967.65 | -12.64   | -24952.40 | -16.65   |
| -24965.05 | -10.04   | -24947.04 | -11.29   |
| -24961.99 | -6.98    | -24948.67 | -12.92   |
| -24963.18 | -8.18    | -24950.27 | -14.52   |
| -24967.2  | -12.1656 | -24948.3  | -12.5201 |
| -24967.2  | -12.1478 | -24950.5  | -14.7443 |
|           |          | -24949.2  | -13.4645 |

Average energies      -25152.06      -4.51 -25114.60      -5.56 -25077.30      -6.76 -25039.81      -7.79 -25003.09      -9.57 -24965.40      -10.40 -24949.64      -13.89

# Ca<sub>1-x</sub>M<sub>x</sub>ZrTi<sub>2-2x</sub>Fe<sub>2x</sub>O<sub>7</sub> M=(Ce, Pu, Th, U)

## Ti(3)Ti(3)

N.B. All stated energies are in eV

| Ce                                  | ground    | solid           |                |                 |                 |                 |                 |       |    |  |    |  |
|-------------------------------------|-----------|-----------------|----------------|-----------------|-----------------|-----------------|-----------------|-------|----|--|----|--|
|                                     | state     | solution        |                |                 |                 |                 |                 |       |    |  |    |  |
|                                     | energy    | energy          |                |                 |                 |                 |                 |       |    |  |    |  |
| concentration in solid solution (%) | 3         | 6               | 9              |                 | 12              |                 | 15              |       | 18 |  | 21 |  |
| number of atoms                     | 2         | 4               | 6              |                 | 8               |                 | 10              |       | 12 |  | 14 |  |
|                                     | -25143.79 | -0.91 -25096.39 | 3.32 -25048.52 | 8.02 -25002.09  | 11.28 -24952.52 | 17.68 -24906.41 | 20.61 -24859.63 | 24.22 |    |  |    |  |
|                                     | -25145.25 | -2.36 -25096.38 | 3.33 -25051.08 | 5.46 -25001.79  | 11.58 -24956.46 | 13.74 -24906.49 | 20.53 -24860.14 | 23.71 |    |  |    |  |
|                                     | -25144.63 | -1.74 -25095.70 | 4.02 -25048.03 | 8.52 -25000.15  | 13.22 -24955.65 | 14.55 -24905.23 | 21.79 -24858.85 | 25.00 |    |  |    |  |
|                                     | -25142.32 | 0.57 -25095.16  | 4.56 -25050.04 | 6.50 -24999.31  | 14.06 -24953.81 | 16.38 -24906.31 | 20.71 -24862.47 | 21.38 |    |  |    |  |
|                                     | -25142.15 | 0.74 -25096.79  | 2.93 -25051.06 | 5.49 -25002.19  | 11.17 -24953.65 | 16.54 -24907.22 | 19.81 -24862.80 | 21.05 |    |  |    |  |
|                                     | -25142.62 | 0.26 -25094.82  | 4.90 -25048.38 | 8.16 -25000.93  | 12.44 -24952.67 | 17.53 -24911.29 | 15.73 -24860.84 | 23.01 |    |  |    |  |
|                                     | -25144.61 | -1.72 -25096.37 | 3.34 -25049.34 | 7.20 -25001.16  | 12.21 -24956.34 | 13.86 -24906.52 | 20.51 -24862.01 | 21.84 |    |  |    |  |
|                                     | -25142.12 | 0.77 -25096.75  | 2.97 -25048.14 | 8.41 -25003.47  | 9.90 -24955.15  | 15.04 -24906.07 | 20.95 -24861.40 | 22.45 |    |  |    |  |
|                                     | -25143.64 | -0.76 -25096.87 | 2.84 -25047.45 | 9.10 -25002.12  | 11.25 -24956.82 | 13.38 -24909.50 | 17.53 -24863.27 | 20.58 |    |  |    |  |
|                                     | -25142.56 | 0.33 -25093.06  | 6.66 -25041.57 | 14.97 -24999.75 | 13.62 -24949.36 | 20.84 -24907.05 | 19.97 -24859.08 | 24.77 |    |  |    |  |
|                                     | -25144.30 | -1.41 -25097.06 | 2.65 -25048.74 | 7.80 -25000.90  | 12.47 -24953.95 | 16.25 -24911.20 | 15.82 -24857.90 | 25.95 |    |  |    |  |
|                                     | -25142.53 | 0.36 -25097.19  | 2.53 -25047.77 | 8.77 -25002.36  | 11.01 -24954.95 | 15.25 -24901.56 | 25.46 -24861.55 | 22.30 |    |  |    |  |
|                                     | -25143.86 | -0.97 -25095.94 | 3.78 -25049.53 | 7.01 -25003.39  | 9.98 -24954.10  | 16.10 -24906.57 | 20.45 -24861.67 | 22.18 |    |  |    |  |
|                                     | -25143.01 | -0.12 -25095.32 | 4.40 -25045.89 | 10.65 -25004.56 | 8.81 -24954.99  | 15.21 -24911.25 | 15.77 -24863.57 | 20.28 |    |  |    |  |
|                                     | -25141.29 | 1.60 -25094.87  | 4.85 -25047.29 | 9.26 -25000.51  | 12.86 -24952.21 | 17.99 -24908.16 | 18.86 -24860.89 | 22.96 |    |  |    |  |
|                                     | -25142.92 | -0.03 -25095.90 | 3.82 -25048.18 | 8.36 -24993.50  | 19.87 -24951.63 | 18.57 -24908.47 | 18.55 -24859.44 | 24.41 |    |  |    |  |
|                                     | -25143.00 | -0.11 -25097.11 | 2.60 -25048.97 | 7.57 -25001.89  | 11.48 -24952.89 | 17.31 -24905.81 | 21.21 -24861.33 | 22.52 |    |  |    |  |
|                                     | -25143.20 | -0.31 -25090.85 | 8.86 -25048.30 | 8.24 -25000.97  | 12.40 -24955.05 | 15.15 -24909.59 | 17.43 -24857.06 | 26.79 |    |  |    |  |
|                                     | -25143.51 | -0.62 -25096.64 | 3.07 -25046.34 | 10.20 -25003.58 | 9.79 -24956.03  | 14.17 -24907.28 | 19.74 -24862.36 | 21.49 |    |  |    |  |
|                                     | -25143.25 | -0.36 -25096.74 | 2.97 -25047.75 | 8.79 -24999.02  | 14.35 -24954.96 | 15.24 -24907.32 | 19.70 -24860.35 | 23.50 |    |  |    |  |
|                                     | -25143.18 | -0.30 -25096.96 | 2.76 -25048.35 | 8.19 -24996.49  | 16.88 -24947.05 | 23.15 -24905.32 | 21.70 -24854.21 | 29.64 |    |  |    |  |
|                                     | -25143.24 | -0.35 -25098.14 | 1.57 -25049.76 | 6.78 -25001.73  | 11.64 -24954.68 | 15.51 -24905.47 | 21.55 -24859.07 | 24.78 |    |  |    |  |
|                                     | -25141.62 | 1.27 -25095.93  | 3.79 -25049.61 | 6.93 -24998.44  | 14.93 -24951.68 | 18.52 -24905.65 | 21.37 -24863.71 | 20.13 |    |  |    |  |
|                                     | -25142.86 | 0.03 -25094.66  | 5.05 -25048.65 | 7.89 -25002.86  | 10.51 -24955.58 | 14.61 -24907.79 | 19.23 -24860.12 | 23.73 |    |  |    |  |
|                                     | -25142.81 | 0.07 -25097.25  | 2.46 -25046.44 | 10.10 -25001.27 | 12.10 -24952.46 | 17.74 -24909.20 | 17.82 -24863.01 | 20.84 |    |  |    |  |
|                                     | -25143.83 | -0.94 -25094.40 | 5.32 -25051.29 | 5.26 -25002.50  | 10.87 -24956.75 | 13.45 -24900.33 | 26.69 -24860.00 | 23.85 |    |  |    |  |
|                                     | -25144.20 | -1.31 -25096.03 | 3.69 -25047.69 | 8.85 -25001.15  | 12.22 -24953.15 | 17.05 -24906.18 | 20.84 -24864.49 | 19.36 |    |  |    |  |
|                                     | -25142.98 | -0.09 -25095.47 | 4.25 -25048.83 | 7.71 -25001.01  | 12.35 -24954.80 | 15.39 -24908.32 | 18.70 -24864.08 | 19.77 |    |  |    |  |
|                                     | -25144.03 | -1.14 -25098.03 | 1.69 -25046.99 | 9.55 -25000.75  | 12.62 -24956.96 | 13.23 -24906.16 | 20.87 -24862.47 | 21.38 |    |  |    |  |

|           |                 |                 |                 |                 |                 |                 |       |
|-----------|-----------------|-----------------|-----------------|-----------------|-----------------|-----------------|-------|
| -25142.79 | 0.09 -25096.20  | 3.52 -25049.11  | 7.43 -25000.92  | 12.45 -24958.06 | 12.14 -24906.53 | 20.49 -24855.90 | 27.95 |
| -25144.83 | -1.94 -25095.43 | 4.29 -25048.67  | 7.88 -25001.55  | 11.82 -24951.21 | 18.98 -24907.61 | 19.41 -24863.49 | 20.36 |
| -25136.55 | 6.34 -25095.72  | 3.99 -25049.24  | 7.30 -25001.38  | 11.99 -24956.39 | 13.81 -24908.17 | 18.86 -24862.36 | 21.49 |
| -25142.88 | 0.01 -25095.52  | 4.20 -25049.67  | 6.88 -25004.21  | 9.16 -24906.87  | 63.33 -24908.96 | 18.06 -24859.96 | 23.89 |
| -25143.47 | -0.58 -25093.19 | 6.52 -25049.78  | 6.76 -25003.95  | 9.42 -24954.42  | 15.77 -24863.04 | 63.98 -24865.46 | 18.39 |
| -25143.81 | -0.92 -25095.35 | 4.37 -25049.89  | 6.65 -24955.73  | 57.63 -24952.40 | 17.80 -24907.03 | 19.99 -24860.45 | 23.40 |
| -25096.61 | 46.28 -25048.29 | 51.42 -25050.19 | 6.35 -25002.66  | 10.71 -24953.39 | 16.81 -24903.71 | 23.31 -24859.53 | 24.32 |
| -25143.43 | -0.54 -25095.87 | 3.84 -25047.25  | 9.30 -25000.82  | 12.55 -24953.18 | 17.02 -24908.53 | 18.49 -24860.38 | 23.47 |
| -25143.34 | -0.45 -25095.78 | 3.93 -25049.98  | 6.56 -24999.98  | 13.39 -24954.70 | 15.49 -24910.19 | 16.83 -24856.35 | 27.50 |
| -25143.84 | -0.95 -25096.02 | 3.69 -25049.53  | 7.01 -24998.93  | 14.44 -24955.27 | 14.93 -24905.88 | 21.14 -24859.65 | 24.20 |
| -25142.63 | 0.25 -25095.67  | 4.05 -25050.14  | 6.41 -25001.49  | 11.88 -24950.37 | 19.83 -24904.99 | 22.03 -24860.17 | 23.68 |
| -25142.90 | -0.01 -25096.09 | 3.62 -25047.47  | 9.08 -25004.14  | 9.22 -24949.02  | 21.18 -24908.91 | 18.12 -24857.70 | 26.15 |
| -25143.22 | -0.33 -25097.46 | 2.26 -25049.70  | 6.84 -24999.24  | 14.13 -24956.63 | 13.56 -24907.26 | 19.76 -24858.56 | 25.29 |
| -25144.47 | -1.58 -25097.04 | 2.67 -25049.40  | 7.14 -25001.63  | 11.73 -24953.69 | 16.51 -24907.73 | 19.29 -24860.63 | 23.22 |
| -25143.77 | -0.88 -25097.15 | 2.57 -25050.50  | 6.05 -25002.39  | 10.98 -24951.75 | 18.44 -24905.40 | 21.63 -24862.07 | 21.78 |
| -25145.25 | -2.37 -25095.80 | 3.92 -25048.63  | 7.91 -25001.40  | 11.97 -24957.36 | 12.83 -24908.62 | 18.40 -24860.20 | 23.65 |
| -25143.86 | -0.97 -25096.28 | 3.43 -25047.36  | 9.18 -25001.69  | 11.68 -24951.97 | 18.22 -24908.38 | 18.64 -24861.56 | 22.29 |
| -25143.28 | -0.39 -25096.93 | 2.79 -25046.72  | 9.82 -25000.99  | 12.38 -24955.91 | 14.29 -24910.26 | 16.76 -24859.25 | 24.60 |
| -25143.27 | -0.39 -25095.63 | 4.09 -25047.04  | 9.51 -25001.77  | 11.60 -24954.77 | 15.43 -24909.41 | 17.61 -24861.32 | 22.53 |
| -25142.73 | 0.16 -25094.40  | 5.32 -25049.82  | 6.73 -25001.81  | 11.56 -24954.38 | 15.82 -24904.59 | 22.44 -24861.44 | 22.41 |
| -25143.68 | -0.79 -25095.82 | 3.89 -25049.80  | 6.74 -25000.87  | 12.50 -24954.44 | 15.76 -24907.63 | 19.40 -24861.93 | 21.92 |
| -25141.96 | 0.93 -25095.12  | 4.59 -25050.45  | 6.09 -25004.82  | 8.55 -24954.18  | 16.02 -24905.79 | 21.23 -24864.76 | 19.09 |
| -25141.42 | 1.47 -25092.84  | 6.87 -25048.23  | 8.31 -25003.16  | 10.21 -24956.98 | 13.22 -24906.28 | 20.74 -24862.17 | 21.68 |
| -25143.31 | -0.42 -25095.67 | 4.05 -25047.83  | 8.71 -25005.79  | 7.58 -24955.09  | 15.10 -24907.01 | 20.01 -24863.01 | 20.84 |
| -25143.35 | -0.46 -25093.46 | 6.25 -25049.67  | 6.87 -25001.46  | 11.91 -24954.07 | 16.13 -24906.50 | 20.53 -24854.72 | 29.13 |
| -25142.85 | 0.04 -25092.97  | 6.75 -25049.35  | 7.19 -25000.94  | 12.43 -24953.04 | 17.16 -24905.54 | 21.48 -24860.10 | 23.75 |
| -25141.07 | 1.82 -25094.30  | 5.42 -25050.16  | 6.38 -25000.90  | 12.47 -24955.67 | 14.53 -24899.59 | 27.44 -24862.01 | 21.84 |
| -25144.16 | -1.27 -25095.31 | 4.41 -25047.63  | 8.91 -25003.22  | 10.14 -24951.84 | 18.36 -24907.04 | 19.99 -24861.93 | 21.92 |
| -25143.26 | -0.37 -25091.91 | 7.81 -25048.30  | 8.24 -25001.59  | 11.78 -24954.50 | 15.70 -24911.46 | 15.57 -24859.83 | 24.02 |
| -25143.02 | -0.13 -25095.39 | 4.33 -25049.09  | 7.45 -24999.53  | 13.84 -24954.69 | 15.51 -24906.30 | 20.72 -24860.07 | 23.78 |
| -25142.57 | 0.32 -25096.57  | 3.14 -25049.49  | 7.05 -25000.42  | 12.95 -24956.22 | 13.97 -24909.28 | 17.74 -24859.94 | 23.91 |
| -25142.89 | -0.01 -25095.74 | 3.97 -25049.77  | 6.77 -25003.40  | 9.97 -24955.71  | 14.49 -24906.24 | 20.79 -24858.66 | 25.19 |
| -25142.66 | 0.23 -25095.25  | 4.46 -25049.53  | 7.01 -24997.04  | 16.33 -24951.57 | 18.63 -24903.26 | 23.77 -24860.44 | 23.41 |
| -25143.68 | -0.79 -25095.95 | 3.77 -25047.79  | 8.76 -25003.33  | 10.04 -24953.08 | 17.12 -24902.71 | 24.32 -24861.83 | 22.02 |
| -25144.28 | -1.39 -25095.51 | 4.20 -25049.89  | 6.65 -25001.59  | 11.78 -24955.72 | 14.47 -24907.04 | 19.98 -24861.52 | 22.33 |
| -25143.04 | -0.15 -25096.42 | 3.30 -25049.87  | 6.67 -25000.20  | 13.17 -24953.54 | 16.66 -24907.32 | 19.70 -24859.76 | 24.09 |
| -25143.18 | -0.29 -25094.85 | 4.87 -25048.70  | 7.84 -25002.44  | 10.93 -24954.86 | 15.34 -24908.97 | 18.06 -24859.70 | 24.15 |
| -25143.76 | -0.87 -25095.75 | 3.97 -25048.89  | 7.65 -25002.61  | 10.76 -24952.14 | 18.06 -24907.64 | 19.38 -24862.27 | 21.58 |
| -25143.15 | -0.26 -25093.72 | 5.99 -25043.59  | 12.96 -25003.07 | 10.30 -24956.06 | 14.14 -24908.46 | 18.56 -24858.37 | 25.48 |
| -25142.49 | 0.40 -25096.03  | 3.69 -25049.09  | 7.45 -25002.00  | 11.37 -24951.58 | 18.62 -24907.82 | 19.21 -24861.88 | 21.97 |
| -25144.01 | -1.12 -25096.74 | 2.97 -25045.66  | 10.88 -25002.22 | 11.15 -24956.08 | 14.11 -24908.23 | 18.79 -24860.90 | 22.95 |

|           |       |           |      |           |       |           |       |           |       |           |       |           |       |
|-----------|-------|-----------|------|-----------|-------|-----------|-------|-----------|-------|-----------|-------|-----------|-------|
| -25142.96 | -0.07 | -25096.40 | 3.31 | -25045.82 | 10.72 | -25003.88 | 9.49  | -24953.89 | 16.30 | -24907.26 | 19.76 | -24862.92 | 20.93 |
| -25143.60 | -0.71 | -25094.93 | 4.79 | -25049.59 | 6.96  | -25001.12 | 12.25 | -24906.30 | 63.89 | -24906.23 | 20.79 | -24862.78 | 21.07 |
| -25143.32 | -0.43 | -25097.39 | 2.32 | -25047.14 | 9.40  | -25000.89 | 12.48 | -24954.28 | 15.92 | -24909.27 | 17.75 | -24862.24 | 21.61 |
| -25142.75 | 0.14  | -25096.66 | 3.06 | -25048.93 | 7.61  | -24953.26 | 60.11 | -24956.03 | 14.16 | -24910.89 | 16.13 | -24856.49 | 27.36 |
| -25144.78 | -1.89 | -25095.95 | 3.77 | -25001.50 | 55.04 | -24999.70 | 13.67 | -24955.89 | 14.30 | -24859.45 | 67.57 | -24860.52 | 23.33 |
| -25142.92 | -0.03 | -25094.70 | 5.02 | -25047.68 | 8.86  | -24999.58 | 13.79 | -24952.60 | 17.60 | -24906.76 | 20.26 | -24864.19 | 19.66 |
| -25143.81 | -0.92 | -25097.48 | 2.23 | -25047.65 | 8.89  | -24999.58 | 13.79 | -24951.01 | 19.18 | -24910.12 | 16.91 | -24858.11 | 25.74 |
| -25142.04 | 0.84  | -25096.56 | 3.15 | -25048.50 | 8.04  | -25000.51 | 12.86 | -24953.22 | 16.98 | -24903.70 | 23.32 | -24859.45 | 24.40 |
| -25144.29 | -1.40 | -25097.20 | 2.51 | -25047.68 | 8.86  | -25003.01 | 10.36 | -24953.86 | 16.33 | -24910.31 | 16.71 | -24859.75 | 24.10 |
| -25143.24 | -0.35 | -25095.21 | 4.50 | -25049.39 | 7.15  | -25000.38 | 12.99 | -24954.16 | 16.04 | -24910.96 | 16.06 | -24862.06 | 21.79 |
| -25144.30 | -1.41 | -25096.40 | 3.31 | -25048.28 | 8.26  | -25002.94 | 10.43 | -24954.33 | 15.86 | -24911.01 | 16.01 | -24864.20 | 19.65 |
| -25143.69 | -0.81 | -25094.88 | 4.84 | -25048.31 | 8.23  | -25000.30 | 13.07 | -24954.09 | 16.10 | -24901.00 | 26.02 | -24859.47 | 24.38 |
| -25141.64 | 1.25  | -25093.96 | 5.75 | -25047.36 | 9.18  | -25003.68 | 9.69  | -24957.68 | 12.52 | -24907.96 | 19.06 | -24859.53 | 24.31 |
| -25143.63 | -0.74 | -25095.31 | 4.41 | -25048.63 | 7.92  | -25003.08 | 10.29 | -24955.46 | 14.73 | -24909.31 | 17.71 | -24859.35 | 24.50 |
| -25144.06 | -1.17 | -25096.11 | 3.60 | -25043.99 | 12.55 | -25000.63 | 12.74 | -24954.96 | 15.24 | -24909.89 | 17.14 | -24860.66 | 23.19 |
| -25143.36 | -0.47 | -25095.57 | 4.14 | -25046.99 | 9.55  | -25003.45 | 9.91  | -24950.14 | 20.06 | -24905.01 | 22.01 | -24858.06 | 25.79 |
| -25144.06 | -1.17 | -25095.95 | 3.77 | -25049.40 | 7.14  | -25002.44 | 10.93 | -24953.66 | 16.53 | -24902.78 | 24.24 | -24862.09 | 21.76 |
| -25143.06 | -0.17 | -25095.04 | 4.68 | -25049.78 | 6.76  | -25004.25 | 9.11  | -24949.22 | 20.97 | -24862.88 | 64.14 | -24861.89 | 21.96 |
| -25143.85 | -0.96 | -25095.00 | 4.72 | -25048.79 | 7.75  | -24998.43 | 14.94 | -24957.64 | 12.55 | -24906.11 | 20.91 | -24859.26 | 24.59 |
| -25143.31 | -0.42 | -25095.10 | 4.62 | -25047.38 | 9.16  | -24999.02 | 14.35 | -24954.95 | 15.25 | -24908.10 | 18.92 | -24860.81 | 23.04 |
| -25142.38 | 0.51  | -25094.36 | 5.35 | -25046.64 | 9.90  | -25001.23 | 12.14 | -24952.94 | 17.25 | -24907.09 | 19.93 | -24861.22 | 22.63 |
| -25141.70 | 1.18  | -25097.24 | 2.48 | -25048.50 | 8.04  | -24999.19 | 14.18 | -24954.83 | 15.36 | -24907.67 | 19.35 | -24860.76 | 23.09 |
| -25143.14 | -0.25 | -25096.97 | 2.74 | -25050.64 | 5.91  | -25002.94 | 10.43 | -24954.64 | 15.56 | -24908.52 | 18.50 | -24864.11 | 19.74 |
| -25143.62 | -0.73 | -25098.21 | 1.50 | -25050.49 | 6.05  | -25002.16 | 11.21 | -24954.88 | 15.32 | -24909.78 | 17.25 | -24856.62 | 27.23 |
| -25143.52 | -0.63 | -25094.10 | 5.62 | -25049.13 | 7.42  | -25000.11 | 13.26 | -24953.70 | 16.50 | -24907.30 | 19.73 | -24859.03 | 24.82 |
| -25143.29 | -0.40 | -25094.90 | 4.82 | -25049.17 | 7.37  | -25001.37 | 12.00 | -24955.77 | 14.42 | -24907.27 | 19.76 | -24860.29 | 23.56 |
| -25142.54 | 0.35  | -25096.79 | 2.93 | -25048.43 | 8.11  | -25004.17 | 9.20  | -24957.08 | 13.11 | -24907.05 | 19.98 | -24863.19 | 20.66 |
| -25142.77 | 0.11  | -25093.87 | 5.84 | -25050.19 | 6.35  | -25004.75 | 8.62  | -24954.15 | 16.04 | -24909.25 | 17.77 | -24862.38 | 21.47 |
| -25143.41 | -0.52 | -25097.31 | 2.40 | -25049.70 | 6.84  | -25000.56 | 12.80 | -24954.19 | 16.01 | -24909.25 | 17.77 | -24862.43 | 21.42 |
| -25142.88 | 0.01  | -25097.62 | 2.10 | -25050.11 | 6.43  | -24998.58 | 14.79 | -24955.57 | 14.63 | -24905.47 | 21.55 | -24858.89 | 24.96 |
| -25142.90 | -0.01 | -25094.46 | 5.25 | -25046.34 | 10.20 | -24998.86 | 14.51 | -24951.22 | 18.98 | -24904.96 | 22.07 | -24852.55 | 31.30 |
| -25143.08 | -0.19 | -25094.87 | 4.85 | -25049.10 | 7.44  | -25003.34 | 10.03 | -24953.55 | 16.65 | -24907.65 | 19.38 | -24863.32 | 20.53 |
| -25143.22 | -0.34 | -25098.12 | 1.59 | -25047.45 | 9.09  | -25002.74 | 10.63 | -24952.87 | 17.32 | -24910.02 | 17.00 | -24860.17 | 23.68 |
| -25144.46 | -1.57 | -25095.52 | 4.19 | -25049.97 | 6.57  | -24998.53 | 14.84 | -24955.31 | 14.89 | -24906.26 | 20.76 | -24858.96 | 24.89 |
| -25143.83 | -0.94 | -25095.76 | 3.96 | -25046.32 | 10.22 | -24999.31 | 14.06 | -24956.61 | 13.59 | -24907.61 | 19.41 | -24858.32 | 25.53 |
| -25142.88 | 0.01  | -25095.86 | 3.86 | -25048.46 | 8.09  | -25001.67 | 11.70 | -24955.31 | 14.89 | -24908.93 | 18.09 | -24861.18 | 22.67 |
| -25144.85 | -1.97 | -25094.86 | 4.85 | -25049.25 | 7.30  | -25004.44 | 8.93  | -24952.77 | 17.42 | -24907.78 | 19.24 | -24859.04 | 24.81 |
| -25142.79 | 0.10  | -25096.54 | 3.18 | -25048.75 | 7.79  | -25003.45 | 9.91  | -24955.78 | 14.41 | -24905.93 | 21.09 | -24861.98 | 21.86 |
| -25142.59 | 0.29  | -25096.60 | 3.12 | -25048.87 | 7.68  | -25002.44 | 10.93 | -24956.57 | 13.63 | -24907.23 | 19.79 | -24863.87 | 19.98 |
| -25143.36 | -0.47 | -25095.73 | 3.98 | -25049.68 | 6.86  | -25000.85 | 12.52 | -24955.75 | 14.45 | -24904.20 | 22.83 | -24860.91 | 22.94 |
| -25143.86 | -0.97 | -25096.75 | 2.97 | -25048.16 | 8.38  | -25002.43 | 10.94 | -24954.88 | 15.32 | -24904.54 | 22.48 | -24861.59 | 22.26 |

|           |       |           |      |           |       |           |       |           |       |           |       |           |       |
|-----------|-------|-----------|------|-----------|-------|-----------|-------|-----------|-------|-----------|-------|-----------|-------|
| -25141.93 | 0.96  | -25096.94 | 2.78 | -25048.12 | 8.42  | -25000.48 | 12.89 | -24955.05 | 15.15 | -24903.09 | 23.93 | -24860.30 | 23.55 |
| -25144.39 | -1.50 | -25095.18 | 4.54 | -25049.01 | 7.54  | -25003.16 | 10.21 |           |       | -24906.56 | 20.47 | -24861.82 | 22.03 |
| -25143.32 | -0.43 | -25096.80 | 2.92 | -25049.52 | 7.02  | -24999.03 | 14.34 |           |       | -24904.73 | 22.29 | -24860.98 | 22.87 |
| -25143.35 | -0.47 | -25095.19 | 4.53 | -25048.42 | 8.12  | -25001.56 | 11.81 |           |       | -24909.00 | 18.02 | -24859.24 | 24.61 |
| -25143.51 | -0.62 | -25094.83 | 4.88 | -25046.70 | 9.84  |           |       |           |       | -24905.86 | 21.17 |           |       |
| -25144.42 | -1.53 | -25094.26 | 5.46 | -25045.91 | 10.63 |           |       |           |       | -24908.01 | 19.01 |           |       |
| -25140.96 | 1.93  | -25096.43 | 3.28 | -25049.52 | 7.02  |           |       |           |       |           |       |           |       |

Average energies -25142.81 0.08 -25095.34 4.38 -25048.12 8.42 -25000.65 12.72 -24953.36 16.84 -24905.98 21.05 -24860.67 23.18

ground state energy  
solid solution energy

**Pu**

concentration in solid solution (%)  
number of atoms

|           | 3     | 6         | 9    | 12        | 15    | 18        | 21    |           |       |           |       |           |        |
|-----------|-------|-----------|------|-----------|-------|-----------|-------|-----------|-------|-----------|-------|-----------|--------|
|           | 2     | 4         | 6    | 8         | 10    | 12        | 14    |           |       |           |       |           |        |
| -25138.63 | -1.73 | -25083.45 | 4.29 | -25030.88 | 7.71  | -24976.35 | 13.08 | -24922.98 | 17.28 | -24874.33 | 16.78 | -24822.00 | 19.95  |
| -25136.19 | 0.72  | -25085.85 | 1.90 | -25033.01 | 5.57  | -24976.59 | 12.84 | -24925.71 | 14.56 | -24871.95 | 19.16 | -24819.76 | 22.19  |
| -25133.90 | 3.00  | -25085.35 | 2.40 | -25032.69 | 5.89  | -24976.53 | 12.90 | -24924.75 | 15.51 | -24873.11 | 18.00 | -24861.98 | -20.03 |
| -25136.63 | 0.28  | -25085.39 | 2.36 | -25026.47 | 12.11 | -24976.57 | 12.85 | -24925.04 | 15.23 | -24875.44 | 15.67 | -24820.26 | 21.69  |
| -25137.12 | -0.22 | -25084.61 | 3.14 | -25031.91 | 6.68  | -24979.84 | 9.58  | -24926.42 | 13.85 | -24873.03 | 18.08 | -24821.08 | 20.87  |
| -25137.29 | -0.39 | -25083.38 | 4.37 | -25031.63 | 6.95  | -24975.75 | 13.68 | -24927.70 | 12.57 | -24870.80 | 20.31 | -24814.36 | 27.59  |
| -25137.47 | -0.57 | -25084.65 | 3.09 | -25030.70 | 7.89  | -24974.10 | 15.32 | -24924.47 | 15.80 | -24874.45 | 16.66 | -24820.23 | 21.72  |
| -25137.58 | -0.67 | -25084.07 | 3.68 | -25031.08 | 7.51  | -24978.28 | 11.15 | -24923.29 | 16.98 | -24872.54 | 18.57 | -24821.13 | 20.82  |
| -25136.28 | 0.62  | -25083.70 | 4.05 | -25024.82 | 13.77 | -24975.55 | 13.88 | -24924.80 | 15.47 | -24873.52 | 17.59 | -24820.92 | 21.03  |
| -25136.19 | 0.71  | -25084.17 | 3.57 | -25029.99 | 8.60  | -24979.22 | 10.21 | -24927.47 | 12.80 | -24876.54 | 14.57 | -24820.02 | 21.93  |
| -25136.88 | 0.02  | -25080.59 | 7.15 | -25031.93 | 6.65  | -24977.89 | 11.54 | -24927.28 | 12.99 | -24874.12 | 16.99 | -24822.43 | 19.52  |
| -25138.11 | -1.21 | -25081.97 | 5.77 | -25033.25 | 5.33  | -24973.85 | 15.58 | -24925.49 | 14.78 | -24874.51 | 16.60 | -24817.47 | 24.48  |
| -25137.12 | -0.22 | -25084.89 | 2.85 | -25030.62 | 7.96  | -24975.40 | 14.03 | -24927.07 | 13.19 | -24874.29 | 16.82 | -24818.45 | 23.50  |
| -25138.23 | -1.32 | -25082.26 | 5.49 | -25029.49 | 9.09  | -24979.24 | 10.19 | -24924.98 | 15.29 | -24875.90 | 15.20 | -24819.97 | 21.98  |
| -25135.80 | 1.10  | -25082.75 | 5.00 | -25031.34 | 7.25  | -24977.45 | 11.97 | -24924.78 | 15.49 | -24874.39 | 16.72 | -24820.26 | 21.69  |
| -25137.17 | -0.27 | -25083.20 | 4.54 | -25032.84 | 5.74  | -24978.29 | 11.14 | -24925.63 | 14.63 | -24874.18 | 16.93 | -24819.28 | 22.67  |
| -25138.17 | -1.26 | -25083.98 | 3.76 | -25029.33 | 9.26  | -24978.40 | 11.03 | -24925.61 | 14.66 | -24870.07 | 21.04 | -24819.13 | 22.82  |
| -25136.82 | 0.08  | -25085.39 | 2.35 | -25030.00 | 8.59  | -24979.95 | 9.48  | -24925.66 | 14.61 | -24874.27 | 16.84 | -24820.34 | 21.61  |
| -25137.34 | -0.44 | -25084.91 | 2.84 | -25030.76 | 7.83  | -24976.98 | 12.45 | -24927.41 | 12.86 | -24868.10 | 23.01 | -24820.12 | 21.83  |
| -25137.18 | -0.28 | -25083.60 | 4.15 | -25030.37 | 8.21  | -24978.13 | 11.30 | -24924.85 | 15.42 | -24874.11 | 17.00 | -24819.65 | 22.30  |
| -25138.67 | -1.77 | -25083.38 | 4.36 | -25032.03 | 6.56  | -24977.62 | 11.80 | -24926.98 | 13.29 | -24874.13 | 16.98 | -24820.85 | 21.10  |
| -25137.70 | -0.80 | -25081.79 | 5.96 | -25033.26 | 5.32  | -24981.29 | 8.14  | -24924.84 | 15.43 | -24873.42 | 17.69 | -24821.66 | 20.29  |
| -25137.84 | -0.94 | -25082.31 | 5.43 | -25029.61 | 8.98  | -24979.50 | 9.93  | -24923.57 | 16.69 | -24872.14 | 18.97 | -24819.07 | 22.88  |
| -25137.45 | -0.54 | -25085.16 | 2.58 | -25029.49 | 9.10  | -24976.44 | 12.99 | -24925.57 | 14.70 | -24874.25 | 16.86 | -24822.19 | 19.76  |
| -25137.26 | -0.36 | -25084.12 | 3.62 | -25030.44 | 8.15  | -24977.25 | 12.18 | -24924.30 | 15.97 | -24872.83 | 18.28 | -24819.03 | 22.92  |



|           |                 |                |                 |                 |                 |                 |       |
|-----------|-----------------|----------------|-----------------|-----------------|-----------------|-----------------|-------|
| -25137.23 | -0.33 -25083.12 | 4.63 -25032.48 | 6.11 -24977.89  | 11.54 -24919.56 | 20.71 -24870.63 | 20.48 -24820.36 | 21.59 |
| -25139.12 | -2.22 -25083.80 | 3.94 -25033.19 | 5.40 -24978.65  | 10.78 -24922.83 | 17.44 -24872.44 | 18.67 -24822.17 | 19.78 |
| -25138.25 | -1.34 -25085.82 | 1.92 -25030.84 | 7.74 -24979.54  | 9.89 -24924.93  | 15.34 -24873.63 | 17.48 -24819.93 | 22.02 |
| -25135.91 | 0.99 -25083.77  | 3.98 -25032.34 | 6.24 -24977.59  | 11.84 -24927.41 | 12.86 -24871.06 | 20.05 -24819.83 | 22.12 |
| -25136.99 | -0.08 -25085.79 | 1.95 -25027.32 | 11.26 -24979.30 | 10.12 -24923.90 | 16.37 -24873.80 | 17.31 -24818.76 | 23.19 |
| -25138.46 | -1.55 -25084.41 | 3.34 -25032.89 | 5.70 -24978.26  | 11.17 -24924.18 | 16.09 -24870.97 | 20.14 -24821.50 | 20.45 |
| -25138.48 | -1.58 -25084.36 | 3.38 -25030.42 | 8.16 -24981.16  | 8.27 -24924.87  | 15.40 -24875.41 | 15.70 -24820.04 | 21.91 |
| -25135.05 | 1.85 -25084.58  | 3.16 -25031.31 | 7.27 -24979.00  | 10.43 -24925.35 | 14.92 -24874.89 | 16.22 -24820.79 | 21.16 |
| -25136.72 | 0.18 -25084.76  | 2.98 -25033.28 | 5.30 -24976.01  | 13.42 -24927.71 | 12.55 -24875.46 | 15.65 -24819.59 | 22.36 |
| -25136.88 | 0.02 -25084.90  | 2.84 -25032.98 | 5.60 -24978.53  | 10.90 -24926.49 | 13.77 -24873.61 | 17.50 -24821.07 | 20.89 |
| -25137.31 | -0.41 -25085.33 | 2.41 -25032.65 | 5.93 -24979.24  | 10.19 -24926.47 | 13.80 -24871.93 | 19.18 -24821.92 | 20.03 |
| -25136.86 | 0.04 -25085.64  | 2.10 -25030.96 | 7.63 -24976.08  | 13.35 -24925.35 | 14.91 -24872.18 | 18.93 -24823.59 | 18.36 |
| -25137.39 | -0.48 -25083.43 | 4.31 -25029.71 | 8.87 -24977.12  | 12.31 -24925.87 | 14.39 -24875.24 | 15.87 -24815.61 | 26.34 |
| -25137.39 | -0.48 -25084.89 | 2.86 -25031.49 | 7.09 -24975.57  | 13.85 -24926.84 | 13.43 -24875.89 | 15.22 -24822.07 | 19.88 |
| -25137.15 | -0.24 -25085.74 | 2.00 -25032.79 | 5.79 -24974.70  | 14.73 -24927.43 | 12.84 -24873.89 | 17.22 -24819.80 | 22.15 |
| -25138.04 | -1.14 -25082.86 | 4.88 -25031.09 | 7.50 -24976.45  | 12.97 -24924.25 | 16.02 -24871.80 | 19.31 -24822.23 | 19.72 |
| -25138.04 | -1.13 -25084.43 | 3.32 -25033.11 | 5.48 -24978.37  | 11.06 -24926.32 | 13.95 -24873.48 | 17.63 -24822.67 | 19.29 |
| -25136.33 | 0.57 -25084.96  | 2.79 -25030.40 | 8.18 -24977.79  | 11.64 -24926.01 | 14.26 -24873.89 | 17.22 -24820.43 | 21.52 |
| -25135.72 | 1.19 -25083.94  | 3.80 -25031.24 | 7.35 -24976.18  | 13.25 -24923.91 | 16.36 -24868.89 | 22.22 -24820.62 | 21.33 |
| -25137.00 | -0.10 -25083.63 | 4.11 -25032.67 | 5.91 -24976.57  | 12.86 -24925.43 | 14.84 -24874.93 | 16.18 -24822.62 | 19.33 |
| -25137.86 | -0.96 -25084.48 | 3.27 -25030.96 | 7.63 -24979.35  | 10.07 -24924.74 | 15.52 -24871.82 | 19.29 -24818.13 | 23.82 |
| -25137.79 | -0.89 -25083.02 | 4.72 -25031.45 | 7.14 -24975.71  | 13.71 -24924.56 | 15.70 -24873.47 | 17.64 -24819.98 | 21.97 |
| -25137.64 | -0.73 -25083.65 | 4.09 -25029.64 | 8.94 -24977.02  | 12.40 -24926.44 | 13.83 -24872.89 | 18.22 -24824.37 | 17.58 |
| -25136.27 | 0.63 -25086.15  | 1.60 -25028.20 | 10.38 -24978.54 | 10.89 -24925.46 | 14.81 -24873.83 | 17.28 -24820.77 | 21.18 |
| -25138.32 | -1.42 -25085.81 | 1.93 -25032.42 | 6.17 -24976.91  | 12.52 -24929.05 | 11.21 -24872.05 | 19.06 -24820.71 | 21.24 |
| -25137.71 | -0.81 -25084.61 | 3.13 -25032.48 | 6.11 -24977.92  | 11.51 -24925.35 | 14.91 -24874.59 | 16.52 -24819.21 | 22.74 |
| -25138.25 | -1.35 -25083.74 | 4.01 -25027.79 | 10.80 -24979.07 | 10.36 -24923.57 | 16.70 -24873.24 | 17.87 -24820.22 | 21.73 |
| -25137.17 | -0.27 -25083.49 | 4.25 -25031.07 | 7.52 -24980.10  | 9.32 -24923.02  | 17.25 -24873.24 | 17.87 -24820.99 | 20.96 |
| -25137.20 | -0.29 -25084.57 | 3.18 -25028.74 | 9.85 -24978.54  | 10.88 -24926.02 | 14.25 -24871.96 | 19.15 -24820.12 | 21.83 |
| -25138.22 | -1.32 -25085.41 | 2.34 -25030.73 | 7.86 -24979.32  | 10.11 -24925.51 | 14.76 -24875.17 | 15.94 -24819.24 | 22.71 |
| -25136.04 | 0.86 -25086.86  | 0.89 -25031.40 | 7.19 -24979.17  | 10.26 -24925.47 | 14.80 -24872.28 | 18.83 -24823.79 | 18.16 |
| -25138.59 | -1.69 -25085.36 | 2.39 -25032.87 | 5.71 -24979.34  | 10.08 -24926.92 | 13.35 -24870.68 | 20.43 -24820.40 | 21.55 |
| -25137.18 | -0.28 -25086.90 | 0.85 -25032.56 | 6.03 -24976.21  | 13.22 -24926.04 | 14.23 -24875.54 | 15.57 -24820.11 | 21.84 |
| -25138.58 | -1.68 -25082.71 | 5.03 -25032.00 | 6.58 -24980.12  | 9.31 -24920.77  | 19.50 -24872.93 | 18.18 -24821.93 | 20.02 |
| -25135.97 | 0.94 -25082.11  | 5.64 -25030.20 | 8.38 -24977.13  | 12.29 -24925.40 | 14.87 -24872.59 | 18.52 -24821.60 | 20.35 |
| -25138.09 | -1.19 -25084.83 | 2.91 -25029.68 | 8.91 -24979.65  | 9.77 -24924.62  | 15.65 -24873.53 | 17.58 -24819.48 | 22.47 |
| -25135.79 | 1.11 -25083.03  | 4.71 -25031.49 | 7.09 -24980.36  | 9.07 -24928.18  | 12.09 -24871.75 | 19.35 -24820.43 | 21.52 |
| -25136.58 | 0.32 -25085.18  | 2.57 -25031.84 | 6.75 -24979.33  | 10.10 -24923.05 | 17.22 -24873.72 | 17.39 -24820.47 | 21.48 |
| -25137.95 | -1.05 -25083.90 | 3.85 -25030.72 | 7.87 -24976.77  | 12.65 -24928.06 | 12.21 -24873.83 | 17.28 -24818.40 | 23.55 |
| -25136.10 | 0.80 -25084.66  | 3.08 -25030.42 | 8.17 -24978.67  | 10.76 -24926.47 | 13.80 -24874.39 | 16.72 -24823.69 | 18.27 |
| -25137.44 | -0.54 -25083.48 | 4.26 -25033.13 | 5.46 -24978.03  | 11.40 -24927.02 | 13.25 -24873.04 | 18.07 -24822.31 | 19.64 |

|           |       |           |      |           |       |           |       |           |       |           |       |           |       |
|-----------|-------|-----------|------|-----------|-------|-----------|-------|-----------|-------|-----------|-------|-----------|-------|
| -25136.87 | 0.03  | -25085.07 | 2.67 | -25028.52 | 10.06 | -24974.70 | 14.73 | -24924.86 | 15.41 | -24874.46 | 16.65 | -24819.48 | 22.47 |
| -25137.60 | -0.70 | -25086.44 | 1.30 | -25030.15 | 8.44  | -24976.55 | 12.88 | -24926.38 | 13.89 | -24874.86 | 16.25 | -24819.66 | 22.29 |
| -25138.19 | -1.29 | -25084.76 | 2.98 | -25031.03 | 7.56  | -24977.07 | 12.36 | -24924.14 | 16.13 | -24872.89 | 18.22 | -24821.22 | 20.73 |
| -25136.61 | 0.30  | -25082.40 | 5.34 | -25032.28 | 6.30  | -24978.99 | 10.44 | -24925.08 | 15.19 | -24874.21 | 16.90 | -24822.89 | 19.06 |
| -25138.09 | -1.19 | -25084.57 | 3.18 | -25032.39 | 6.19  | -24980.42 | 9.01  | -24927.07 | 13.19 | -24865.94 | 25.17 | -24820.00 | 21.96 |
| -25136.60 | 0.31  | -25085.24 | 2.50 | -25029.34 | 9.24  | -24978.99 | 10.44 | -24922.31 | 17.96 | -24874.75 | 16.36 | -24820.74 | 21.21 |
| -25136.32 | 0.59  | -25082.76 | 4.99 | -25032.92 | 5.66  | -24979.48 | 9.95  | -24926.24 | 14.03 | -24869.42 | 21.69 | -24821.13 | 20.82 |
| -25133.53 | 3.38  | -25082.01 | 5.74 | -25032.62 | 5.96  | -24977.76 | 11.66 | -24922.86 | 17.41 | -24869.94 | 21.17 | -24817.89 | 24.06 |
| -25137.68 | -0.78 | -25083.42 | 4.33 | -25029.18 | 9.40  | -24977.11 | 12.32 | -24924.91 | 15.36 | -24871.36 | 19.75 | -24820.74 | 21.21 |
| -25137.71 | -0.81 | -25084.11 | 3.64 | -25033.29 | 5.30  | -24976.87 | 12.56 | -24925.97 | 14.30 | -24874.73 | 16.38 | -24818.57 | 23.38 |
| -25137.80 | -0.90 | -25082.25 | 5.49 | -25028.77 | 9.82  | -24979.32 | 10.10 | -24925.48 | 14.79 | -24876.13 | 14.98 | -24823.14 | 18.81 |
| -25138.14 | -1.24 | -25083.66 | 4.09 | -25032.56 | 6.02  | -24978.32 | 11.11 | -24929.75 | 10.52 | -24870.64 | 20.47 | -24819.45 | 22.50 |
| -25137.46 | -0.56 | -25084.87 | 2.87 | -25032.79 | 5.79  | -24978.41 | 11.01 | -24923.67 | 16.60 | -24873.34 | 17.77 | -24822.16 | 19.79 |
| -25136.91 | 0.00  | -25085.35 | 2.39 | -25031.38 | 7.20  | -24977.63 | 11.80 | -24926.03 | 14.24 | -24821.13 | 69.98 | -24820.84 | 21.11 |
| -25138.17 | -1.26 | -25084.76 | 2.98 | -25029.71 | 8.88  | -24978.68 | 10.75 | -24926.29 | 13.98 | -24869.13 | 21.98 | -24817.81 | 24.15 |
| -25136.92 | -0.01 | -25083.34 | 4.40 | -25030.89 | 7.70  | -24979.09 | 10.34 | -24924.95 | 15.32 | -24870.03 | 21.08 | -24820.17 | 21.78 |
| -25137.04 | -0.14 | -25081.52 | 6.23 | -25029.14 | 9.44  | -24980.36 | 9.06  | -24919.97 | 20.30 | -24868.94 | 22.17 | -24820.55 | 21.40 |
| -25137.31 | -0.41 | -25084.03 | 3.72 | -25031.97 | 6.62  | -24977.38 | 12.04 | -24926.44 | 13.83 | -24871.30 | 19.81 | -24817.99 | 23.96 |
| -25135.98 | 0.92  | -25083.83 | 3.92 | -25028.39 | 10.20 | -24978.56 | 10.87 | -24922.48 | 17.79 | -24873.41 | 17.70 | -24822.32 | 19.63 |
| -25137.01 | -0.11 | -25084.35 | 3.40 | -25031.76 | 6.82  | -24976.49 | 12.94 | -24923.86 | 16.41 | -24869.98 | 21.13 | -24818.48 | 23.47 |
| -25136.84 | 0.06  | -25085.47 | 2.27 | -25032.01 | 6.58  | -24979.18 | 10.25 | -24923.41 | 16.86 | -24871.91 | 19.20 | -24823.06 | 18.89 |
| -25137.69 | -0.79 | -25086.26 | 1.48 | -25031.78 | 6.81  | -24976.64 | 12.79 | -24925.90 | 14.37 | -24874.73 | 16.38 | -24822.48 | 19.47 |
| -25136.90 | 0.00  | -25084.40 | 3.34 | -25029.98 | 8.60  | -24975.43 | 14.00 | -24928.87 | 11.40 | -24871.21 | 19.90 | -24818.30 | 23.65 |
| -25137.79 | -0.89 | -25083.29 | 4.45 | -25032.16 | 6.42  | -24979.49 | 9.94  | -24923.09 | 17.18 | -24872.61 | 18.50 | -24820.46 | 21.50 |
| -25137.22 | -0.31 | -25084.27 | 3.47 | -25031.25 | 7.34  | -24978.37 | 11.06 | -24926.88 | 13.39 | -24873.11 | 18.00 | -24814.61 | 27.34 |
| -25136.95 | -0.04 | -25084.44 | 3.30 | -25030.78 | 7.80  | -24980.57 | 8.86  | -24926.08 | 14.19 | -24871.85 | 19.26 | -24820.40 | 21.55 |
| -25138.87 | -1.97 | -25083.65 | 4.09 | -25030.06 | 8.53  | -24979.24 | 10.19 | -24926.19 | 14.08 | -24872.60 | 18.51 | -24819.53 | 22.42 |
| -25137.84 | -0.93 | -25084.69 | 3.05 | -25030.95 | 7.64  | -24979.34 | 10.08 | -24926.30 | 13.97 | -24872.83 | 18.28 | -24818.33 | 23.62 |
| -25139.06 | -2.16 | -25084.54 | 3.20 | -25031.78 | 6.81  | -24979.13 | 10.30 | -24926.40 | 13.87 | -24821.31 | 69.80 | -24823.40 | 18.55 |
| -25137.69 | -0.79 | -25085.51 | 2.24 | -25032.59 | 5.99  | -24979.95 | 9.48  | -24927.64 | 12.62 | -24875.07 | 16.04 | -24819.55 | 22.40 |
| -25136.92 | -0.02 | -25083.45 | 4.30 | -25031.64 | 6.94  | -24976.80 | 12.63 | -24871.92 | 68.35 | -24876.06 | 15.05 | -24819.27 | 22.69 |
| -25135.96 | 0.95  | -25085.84 | 1.90 | -25030.97 | 7.61  | -24977.22 | 12.21 | -24925.14 | 15.13 | -24873.74 | 17.37 | -24820.35 | 21.60 |
| -25136.83 | 0.08  | -25081.96 | 5.79 | -25031.01 | 7.58  | -24976.56 | 12.86 | -24926.19 | 14.08 | -24875.13 | 15.98 | -24819.58 | 22.37 |
| -25136.81 | 0.10  | -25087.42 | 0.33 | -25031.42 | 7.17  | -24979.52 | 9.91  | -24924.91 | 15.36 | -24875.25 | 15.86 | -24822.37 | 19.58 |
| -25137.46 | -0.56 | -25083.62 | 4.13 | -25029.23 | 9.35  | -24976.25 | 13.17 | -24922.80 | 17.47 | -24871.10 | 20.01 | -24821.24 | 20.71 |
| -25138.49 | -1.59 | -25083.83 | 3.91 | -25032.60 | 5.99  | -24979.76 | 9.66  | -24927.35 | 12.92 | -24874.14 | 16.97 | -24820.24 | 21.71 |
| -25137.28 | -0.37 | -25083.69 | 4.06 | -25030.17 | 8.41  | -24977.31 | 12.12 | -24925.37 | 14.90 | -24874.27 | 16.84 | -24816.72 | 25.23 |
| -25137.94 | -1.03 | -25085.39 | 2.36 | -25031.13 | 7.46  | -24979.97 | 9.46  | -24925.35 | 14.92 | -24872.96 | 18.15 | -24819.31 | 22.64 |
| -25138.32 | -1.41 | -25084.38 | 3.37 | -25032.89 | 5.69  | -24977.81 | 11.62 | -24926.41 | 13.86 | -24872.00 | 19.11 | -24821.94 | 20.01 |
| -25137.07 | -0.17 | -25084.52 | 3.22 | -25030.44 | 8.15  | -24977.87 | 11.55 | -24927.84 | 12.43 | -24871.86 | 19.25 | -24819.14 | 22.81 |
| -25137.82 | -0.92 | -25084.04 | 3.70 | -25032.66 | 5.92  | -24977.29 | 12.14 | -24926.60 | 13.67 | -24873.67 | 17.44 | -24821.29 | 20.66 |

|           |          |           |          |           |          |           |          |           |          |           |          |           |          |
|-----------|----------|-----------|----------|-----------|----------|-----------|----------|-----------|----------|-----------|----------|-----------|----------|
| -25137.82 | -0.92    | -25083.64 | 4.11     | -25030.03 | 8.56     | -24980.96 | 8.47     | -24928.54 | 11.73    | -24874.70 | 16.41    | -24819.41 | 22.54    |
| -25138.96 | -2.06    | -25082.36 | 5.38     | -25029.73 | 8.85     | -24978.36 | 11.07    | -24924.65 | 15.62    | -24873.26 | 17.85    | -24819.79 | 22.16    |
| -25137.73 | -0.83    | -25083.59 | 4.15     | -25029.10 | 9.49     | -24977.36 | 12.07    | -24925.90 | 14.37    | -24873.09 | 18.02    | -24820.65 | 21.30    |
| -25137.39 | -0.49    | -25083.03 | 4.71     | -25032.23 | 6.35     | -24980.46 | 8.97     | -24925    | 15.27433 | -24872.11 | 18.99    | -24821.62 | 20.33    |
| -25138.75 | -1.85    | -25085.02 | 2.73     | -25029.99 | 8.59     | -24922.5  | 66.95727 | -24925.2  | 15.09013 | -24821.30 | 69.81    | -24819.9  | 22.07393 |
| -25136.77 | 0.13     | -25083.24 | 4.50     | -25029.93 | 8.66     | -24978.3  | 11.15519 | -24877.4  | 62.82361 | -24872.86 | 18.25    | -24816.4  | 25.58176 |
| -25137.68 | -0.78    | -25030.02 | 57.72    | -24977.00 | 61.58    | -24977    | 12.39393 | -24926    | 14.31275 | -24871.3  | 19.80135 | -24821.8  | 20.12987 |
| -25084.81 | 52.09    | -25085.77 | 1.98     | -25028.14 | 10.45    | -24977.8  | 11.60351 | -24925.4  | 14.8254  | -24874.9  | 16.17537 | -24818.4  | 23.57531 |
| -25137.15 | -0.25    | -25084.99 | 2.75     | -25032.89 | 5.70     | -24978.9  | 10.53572 | -24923.9  | 16.35456 | -24872.1  | 19.04699 |           |          |
| -25137.33 | -0.43    | -25085.4  | 2.321192 | -25030.1  | 8.470109 |           |          | -24926.7  | 13.60151 |           |          |           |          |
| -25136.9  | 0.027494 | -25084.5  | 3.281741 | -25030.3  | 8.296498 |           |          |           |          |           |          |           |          |
| -25137    | -0.11984 |           |          |           |          |           |          |           |          |           |          |           |          |

Average energies -25136.86 0.05 -25083.76 3.98 -25030.57 8.02 -24977.54 11.88 -24924.58 15.69 -24871.69 19.41 -24820.68 21.27

ground solid  
state solution  
energy energy

Th

concentration in solid solution (%)  
number of atoms

|           | 3     | 6         | 9    | 12        | 15    | 18        | 21    |           |       |           |       |           |       |
|-----------|-------|-----------|------|-----------|-------|-----------|-------|-----------|-------|-----------|-------|-----------|-------|
|           | 2     | 4         | 6    | 8         | 10    | 12        | 14    |           |       |           |       |           |       |
| -25142.63 | -0.10 | -25094.68 | 4.33 | -25047.68 | 7.80  | -24996.17 | 15.78 | -24954.99 | 13.43 | -24905.13 | 19.76 | -24858.43 | 22.94 |
| -25143.78 | -1.24 | -25094.98 | 4.03 | -25046.57 | 8.91  | -24999.83 | 12.12 | -24955.13 | 13.29 | -24907.53 | 17.36 | -24855.05 | 26.32 |
| -25142.51 | 0.03  | -25096.48 | 2.52 | -25046.85 | 8.62  | -25002.16 | 9.78  | -24950.45 | 17.97 | -24906.27 | 18.63 | -24858.15 | 23.22 |
| -25143.00 | -0.47 | -25095.95 | 3.05 | -25048.99 | 6.49  | -24995.98 | 15.97 | -24953.35 | 15.07 | -24907.53 | 17.36 | -24856.08 | 25.28 |
| -25143.07 | -0.53 | -25096.22 | 2.79 | -25047.00 | 8.47  | -25002.23 | 9.72  | -24952.21 | 16.21 | -24907.33 | 17.56 | -24856.83 | 24.54 |
| -25143.13 | -0.59 | -25094.41 | 4.60 | -25047.63 | 7.85  | -24999.30 | 12.65 | -24953.50 | 14.92 | -24907.17 | 17.72 | -24853.66 | 27.70 |
| -25142.90 | -0.37 | -25094.95 | 4.06 | -25048.26 | 7.22  | -25001.58 | 10.36 | -24953.27 | 15.15 | -24905.40 | 19.49 | -24853.22 | 28.14 |
| -25143.32 | -0.78 | -25095.15 | 3.86 | -25048.13 | 7.35  | -24999.45 | 12.50 | -24949.53 | 18.89 | -24906.77 | 18.12 | -24857.25 | 24.12 |
| -25142.05 | 0.48  | -25095.89 | 3.11 | -25044.16 | 11.31 | -24999.06 | 12.89 | -24949.73 | 18.69 | -24905.50 | 19.40 | -24854.08 | 27.28 |
| -25141.97 | 0.56  | -25097.29 | 1.71 | -25048.14 | 7.34  | -25001.33 | 10.62 | -24950.21 | 18.21 | -24902.96 | 21.94 | -24860.39 | 20.98 |
| -25144.26 | -1.72 | -25095.37 | 3.64 | -25047.42 | 8.06  | -24999.23 | 12.72 | -24951.09 | 17.33 | -24904.69 | 20.21 | -24855.48 | 25.89 |
| -25139.75 | 2.79  | -25094.78 | 4.23 | -25047.18 | 8.30  | -25000.56 | 11.39 | -24950.50 | 17.92 | -24900.18 | 24.71 | -24861.36 | 20.00 |
| -25143.26 | -0.73 | -25094.74 | 4.26 | -25048.44 | 7.03  | -25001.03 | 10.92 | -24953.65 | 14.77 | -24902.22 | 22.67 | -24857.03 | 24.34 |
| -25142.77 | -0.23 | -25096.11 | 2.89 | -25049.97 | 5.51  | -24999.43 | 12.52 | -24951.32 | 17.10 | -24906.69 | 18.20 | -24857.72 | 23.65 |
| -25143.93 | -1.40 | -25095.78 | 3.23 | -25048.20 | 7.27  | -24999.91 | 12.04 | -24952.25 | 16.17 | -24906.10 | 18.79 | -24861.15 | 20.21 |
| -25141.36 | 1.17  | -25095.57 | 3.43 | -25052.49 | 2.98  | -24996.87 | 15.08 | -24949.94 | 18.48 | -24902.39 | 22.50 | -24855.58 | 25.79 |
| -25142.87 | -0.34 | -25095.31 | 3.70 | -25047.52 | 7.95  | -24999.92 | 12.03 | -24948.37 | 20.05 | -24897.17 | 27.73 | -24854.28 | 27.08 |
| -25143.03 | -0.49 | -25095.71 | 3.29 | -25045.65 | 9.83  | -24994.40 | 17.55 | -24952.75 | 15.67 | -24902.55 | 22.34 | -24859.09 | 22.28 |
| -25141.67 | 0.86  | -25094.99 | 4.01 | -25043.98 | 11.50 | -25002.17 | 9.78  | -24952.55 | 15.87 | -24901.38 | 23.51 | -24858.93 | 22.44 |
| -25142.49 | 0.04  | -25096.49 | 2.52 | -25048.61 | 6.87  | -24999.78 | 12.17 | -24950.40 | 18.02 | -24904.25 | 20.64 | -24858.56 | 22.81 |

|           |       |           |      |           |       |           |       |           |       |           |       |           |       |
|-----------|-------|-----------|------|-----------|-------|-----------|-------|-----------|-------|-----------|-------|-----------|-------|
| -25143.80 | -1.26 | -25094.89 | 4.12 | -25048.71 | 6.77  | -24999.81 | 12.14 | -24949.90 | 18.52 | -24902.60 | 22.30 | -24856.37 | 24.99 |
| -25143.59 | -1.06 | -25095.45 | 3.56 | -25048.61 | 6.87  | -24999.20 | 12.75 | -24954.67 | 13.75 | -24903.93 | 20.96 | -24859.68 | 21.68 |
| -25142.74 | -0.21 | -25096.46 | 2.55 | -25045.34 | 10.14 | -24999.28 | 12.67 | -24951.88 | 16.54 | -24907.39 | 17.50 | -24858.44 | 22.92 |
| -25143.54 | -1.00 | -25094.48 | 4.53 | -25047.44 | 8.03  | -25000.91 | 11.04 | -24955.17 | 13.25 | -24905.95 | 18.94 | -24861.41 | 19.96 |
| -25142.17 | 0.36  | -25093.47 | 5.54 | -25046.07 | 9.40  | -25001.11 | 10.84 | -24953.20 | 15.22 | -24906.14 | 18.75 | -24859.51 | 21.86 |
| -25144.74 | -2.20 | -25093.77 | 5.24 | -25047.49 | 7.99  | -25000.22 | 11.73 | -24952.45 | 15.97 | -24906.68 | 18.21 | -24860.62 | 20.74 |
| -25144.10 | -1.56 | -25092.96 | 6.05 | -25044.73 | 10.75 | -25001.67 | 10.28 | -24952.56 | 15.86 | -24903.58 | 21.31 | -24861.41 | 19.95 |
| -25143.39 | -0.86 | -25095.62 | 3.38 | -25047.31 | 8.17  | -24998.38 | 13.57 | -24950.15 | 18.27 | -24903.61 | 21.28 | -24861.20 | 20.17 |
| -25143.76 | -1.23 | -25095.07 | 3.94 | -25047.30 | 8.18  | -24998.87 | 13.08 | -24951.32 | 17.10 | -24907.34 | 17.55 | -24859.42 | 21.94 |
| -25142.76 | -0.23 | -25095.69 | 3.31 | -25044.60 | 10.88 | -24998.40 | 13.55 | -24950.51 | 17.91 | -24902.70 | 22.20 | -24854.51 | 26.85 |
| -25142.05 | 0.49  | -25096.09 | 2.92 | -25048.64 | 6.84  | -25000.73 | 11.21 | -24952.31 | 16.11 | -24908.05 | 16.85 | -24858.24 | 23.12 |
| -25144.31 | -1.78 | -25094.67 | 4.34 | -25047.97 | 7.51  | -25002.41 | 9.54  | -24952.58 | 15.84 | -24902.74 | 22.15 | -24858.06 | 23.30 |
| -25142.85 | -0.32 | -25095.47 | 3.54 | -25048.64 | 6.83  | -25002.24 | 9.71  | -24955.11 | 13.31 | -24905.40 | 19.49 | -24858.28 | 23.08 |
| -25142.74 | -0.21 | -25096.01 | 3.00 | -25049.03 | 6.44  | -24998.46 | 13.49 | -24950.00 | 18.43 | -24905.87 | 19.02 | -24860.04 | 21.33 |
| -25142.02 | 0.51  | -25095.39 | 3.62 | -25049.86 | 5.62  | -24999.92 | 12.02 | -24957.06 | 11.36 | -24905.42 | 19.48 | -24857.01 | 24.35 |
| -25143.36 | -0.83 | -25095.24 | 3.77 | -25045.48 | 10.00 | -25000.47 | 11.48 | -24954.17 | 14.25 | -24902.60 | 22.29 | -24852.22 | 29.14 |
| -25142.85 | -0.32 | -25092.72 | 6.29 | -25046.83 | 8.65  | -24999.86 | 12.09 | -24954.79 | 13.63 | -24907.20 | 17.70 | -24860.17 | 21.20 |
| -25142.05 | 0.48  | -25094.01 | 5.00 | -25046.98 | 8.50  | -25000.64 | 11.31 | -24951.61 | 16.81 | -24903.37 | 21.52 | -24859.20 | 22.17 |
| -25143.01 | -0.48 | -25098.17 | 0.84 | -25045.90 | 9.57  | -25001.82 | 10.13 | -24954.33 | 14.09 | -24905.77 | 19.12 | -24860.04 | 21.33 |
| -25143.49 | -0.96 | -25094.34 | 4.66 | -25047.47 | 8.01  | -24999.15 | 12.80 | -24955.82 | 12.60 | -24895.13 | 29.77 | -24852.08 | 29.29 |
| -25142.07 | 0.47  | -25094.50 | 4.50 | -25045.66 | 9.81  | -25000.25 | 11.70 | -24951.03 | 17.39 | -24905.79 | 19.10 | -24856.66 | 24.70 |
| -25143.24 | -0.71 | -25094.84 | 4.17 | -25049.10 | 6.38  | -24999.39 | 12.56 | -24949.29 | 19.13 | -24901.99 | 22.90 | -24857.02 | 24.34 |
| -25141.79 | 0.74  | -25094.80 | 4.20 | -25047.04 | 8.44  | -24997.76 | 14.19 | -24953.54 | 14.88 | -24908.76 | 16.13 | -24850.98 | 30.38 |
| -25142.07 | 0.46  | -25094.95 | 4.05 | -25045.93 | 9.55  | -25002.37 | 9.58  | -24951.45 | 16.97 | -24907.95 | 16.95 | -24859.72 | 21.64 |
| -25143.20 | -0.67 | -25094.56 | 4.44 | -25047.50 | 7.98  | -25001.82 | 10.13 | -24949.98 | 18.44 | -24905.44 | 19.45 | -24856.22 | 25.15 |
| -25143.58 | -1.05 | -25094.26 | 4.75 | -25045.46 | 10.02 | -25001.16 | 10.79 | -24953.66 | 14.76 | -24906.75 | 18.15 | -24858.96 | 22.40 |
| -25143.83 | -1.29 | -25095.33 | 3.67 | -25050.19 | 5.28  | -25000.69 | 11.26 | -24954.09 | 14.34 | -24904.73 | 20.17 | -24861.50 | 19.87 |
| -25142.55 | -0.02 | -25093.79 | 5.22 | -25046.59 | 8.88  | -24999.89 | 12.06 | -24947.32 | 21.10 | -24906.19 | 18.70 | -24856.71 | 24.65 |
| -25142.93 | -0.40 | -25092.81 | 6.20 | -25048.38 | 7.09  | -25001.77 | 10.18 | -24952.56 | 15.86 | -24898.54 | 26.35 | -24856.69 | 24.68 |
| -25141.28 | 1.25  | -25096.07 | 2.93 | -25048.14 | 7.33  | -25003.38 | 8.57  | -24954.01 | 14.41 | -24905.31 | 19.59 | -24862.42 | 18.94 |
| -25142.85 | -0.32 | -25094.86 | 4.14 | -25047.56 | 7.92  | -24999.49 | 12.45 | -24951.99 | 16.43 | -24906.06 | 18.83 | -24859.78 | 21.59 |
| -25143.87 | -1.33 | -25095.06 | 3.95 | -25048.08 | 7.40  | -24997.91 | 14.04 | -24953.81 | 14.61 | -24903.68 | 21.21 | -24857.52 | 23.84 |
| -25143.27 | -0.74 | -25093.21 | 5.80 | -25047.64 | 7.84  | -24998.07 | 13.88 | -24949.27 | 19.15 | -24908.00 | 16.89 | -24851.78 | 29.59 |
| -25143.26 | -0.72 | -25095.32 | 3.69 | -25049.52 | 5.96  | -25000.68 | 11.26 | -24951.82 | 16.60 | -24904.99 | 19.90 | -24859.13 | 22.24 |
| -25143.33 | -0.79 | -25095.37 | 3.64 | -25047.74 | 7.74  | -24999.89 | 12.06 | -24951.62 | 16.80 | -24904.70 | 20.19 | -24856.17 | 25.20 |
| -25138.14 | 4.40  | -25094.10 | 4.91 | -25048.72 | 6.76  | -25001.10 | 10.85 | -24952.54 | 15.88 | -24895.81 | 29.08 | -24857.69 | 23.67 |
| -25142.02 | 0.52  | -25096.72 | 2.29 | -25048.43 | 7.05  | -25000.00 | 11.95 | -24951.06 | 17.36 | -24906.02 | 18.87 | -24855.64 | 25.72 |
| -25143.85 | -1.32 | -25096.15 | 2.86 | -25044.98 | 10.50 | -25001.14 | 10.81 | -24954.83 | 13.59 | -24906.32 | 18.58 | -24855.33 | 26.03 |
| -25143.92 | -1.39 | -25092.41 | 6.59 | -25047.72 | 7.76  | -25000.95 | 10.99 | -24955.35 | 13.07 | -24906.98 | 17.91 | -24859.29 | 22.08 |
| -25143.40 | -0.87 | -25096.56 | 2.45 | -25047.11 | 8.37  | -24997.48 | 14.46 | -24955.05 | 13.37 | -24905.75 | 19.15 | -24859.70 | 21.66 |
| -25143.32 | -0.79 | -25096.30 | 2.71 | -25045.41 | 10.07 | -25000.90 | 11.05 | -24953.81 | 14.61 | -24906.16 | 18.73 | -24857.16 | 24.20 |

|           |       |           |       |           |       |           |       |           |       |           |       |           |       |
|-----------|-------|-----------|-------|-----------|-------|-----------|-------|-----------|-------|-----------|-------|-----------|-------|
| -25143.92 | -1.39 | -25094.27 | 4.74  | -25047.49 | 7.99  | -24998.86 | 13.09 | -24950.48 | 17.94 | -24904.57 | 20.32 | -24858.03 | 23.34 |
| -25142.38 | 0.15  | -25095.95 | 3.06  | -25048.17 | 7.31  | -24997.38 | 14.57 | -24950.75 | 17.67 | -24905.83 | 19.06 | -24860.98 | 20.39 |
| -25143.29 | -0.76 | -25094.37 | 4.63  | -25047.45 | 8.02  | -25001.97 | 9.97  | -24953.26 | 15.16 | -24903.66 | 21.23 | -24858.60 | 22.76 |
| -25144.04 | -1.51 | -25094.37 | 4.64  | -25048.01 | 7.46  | -25000.68 | 11.27 | -24952.53 | 15.89 | -24905.11 | 19.79 | -24860.58 | 20.79 |
| -25143.76 | -1.22 | -25095.14 | 3.86  | -25050.64 | 4.84  | -25001.44 | 10.51 | -24949.02 | 19.40 | -24904.06 | 20.83 | -24857.88 | 23.48 |
| -25143.24 | -0.71 | -25095.23 | 3.78  | -25044.45 | 11.03 | -25001.93 | 10.02 | -24951.39 | 17.03 | -24903.64 | 21.25 | -24861.64 | 19.72 |
| -25143.15 | -0.62 | -25097.33 | 1.67  | -25046.75 | 8.73  | -24997.12 | 14.83 | -24949.37 | 19.05 | -24910.32 | 14.58 | -24855.89 | 25.47 |
| -25143.55 | -1.02 | -25092.81 | 6.19  | -25046.46 | 9.02  | -25002.11 | 9.84  | -24953.87 | 14.55 | -24898.06 | 26.83 | -24859.70 | 21.66 |
| -25142.99 | -0.46 | -25092.15 | 6.86  | -25046.65 | 8.83  | -24999.85 | 12.10 | -24952.38 | 16.04 | -24908.87 | 16.02 | -24862.27 | 19.09 |
| -25143.11 | -0.58 | -25095.01 | 4.00  | -25045.57 | 9.90  | -25000.38 | 11.57 | -24952.22 | 16.20 | -24905.06 | 19.83 | -24854.56 | 26.81 |
| -25142.85 | -0.31 | -25094.44 | 4.57  | -25049.02 | 6.45  | -24997.41 | 14.54 | -24949.60 | 18.82 | -24897.54 | 27.35 | -24859.85 | 21.51 |
| -25143.39 | -0.86 | -25095.84 | 3.16  | -25047.53 | 7.95  | -25000.57 | 11.38 | -24951.12 | 17.31 | -24904.11 | 20.78 | -24856.33 | 25.03 |
| -25142.85 | -0.32 | -25095.52 | 3.49  | -25046.79 | 8.69  | -24998.53 | 13.42 | -24955.90 | 12.52 | -24907.28 | 17.61 | -24859.35 | 22.01 |
| -25144.93 | -2.40 | -25096.15 | 2.85  | -25049.66 | 5.82  | -24953.21 | 58.74 | -24949.12 | 19.30 | -24903.17 | 21.72 | -24861.92 | 19.44 |
| -25143.26 | -0.73 | -25094.62 | 4.39  | -25049.19 | 6.29  | -25000.83 | 11.12 | -24951.11 | 17.31 | -24905.15 | 19.74 | -24860.19 | 21.17 |
| -25143.52 | -0.99 | -25094.31 | 4.69  | -25044.95 | 10.52 | -25000.45 | 11.50 | -24949.75 | 18.67 | -24905.42 | 19.47 | -24859.32 | 22.04 |
| -25142.34 | 0.19  | -25095.22 | 3.79  | -25047.93 | 7.55  | -25002.20 | 9.74  | -24951.54 | 16.88 | -24905.04 | 19.86 | -24860.06 | 21.31 |
| -25143.57 | -1.03 | -25095.54 | 3.46  | -25047.48 | 8.00  | -24996.15 | 15.80 | -24904.57 | 63.85 | -24903.35 | 21.54 | -24857.73 | 23.64 |
| -25141.76 | 0.77  | -25045.24 | 53.76 | -25047.70 | 7.78  | -25002.26 | 9.69  | -24953.70 | 14.73 | -24906.96 | 17.93 | -24855.34 | 26.02 |
| -25094.05 | 48.49 | -25095.97 | 3.04  | -24999.15 | 56.33 | -25001.19 | 10.76 | -24953.37 | 15.05 | -24855.58 | 69.31 | -24857.45 | 23.91 |
| -25142.50 | 0.03  | -25095.14 | 3.87  | -25047.20 | 8.27  | -25000.21 | 11.74 | -24954.97 | 13.45 | -24904.62 | 20.27 | -24855.13 | 26.23 |
| -25144.47 | -1.93 | -25094.32 | 4.69  | -25049.30 | 6.18  | -25001.17 | 10.78 | -24952.27 | 16.16 | -24907.29 | 17.60 | -24851.21 | 30.15 |
| -25141.66 | 0.88  | -25094.91 | 4.09  | -25047.91 | 7.57  | -24999.47 | 12.48 | -24951.69 | 16.73 | -24906.19 | 18.71 | -24860.22 | 21.15 |
| -25143.08 | -0.55 | -25095.85 | 3.16  | -25047.34 | 8.13  | -24998.16 | 13.79 | -24952.65 | 15.77 | -24899.07 | 25.82 | -24859.93 | 21.43 |
| -25141.72 | 0.81  | -25095.50 | 3.51  | -25046.36 | 9.12  | -24998.94 | 13.01 | -24949.38 | 19.04 | -24904.41 | 20.48 | -24861.55 | 19.81 |
| -25141.81 | 0.72  | -25095.92 | 3.08  | -25042.51 | 12.97 | -25002.17 | 9.78  | -24950.51 | 17.91 | -24901.66 | 23.24 | -24855.15 | 26.21 |
| -25143.92 | -1.39 | -25097.03 | 1.97  | -25047.79 | 7.69  | -25000.37 | 11.58 | -24953.80 | 14.62 | -24907.22 | 17.67 | -24855.72 | 25.64 |
| -25141.68 | 0.85  | -25095.63 | 3.38  | -25048.07 | 7.41  | -24998.63 | 13.32 | -24953.97 | 14.46 | -24855.10 | 69.79 | -24857.93 | 23.44 |
| -25141.67 | 0.86  | -25093.77 | 5.24  | -25048.75 | 6.73  | -24998.54 | 13.41 | -24950.88 | 17.54 | -24901.55 | 23.34 | -24858.24 | 23.13 |
| -25142.84 | -0.31 | -25096.88 | 2.12  | -25047.14 | 8.34  | -25000.33 | 11.62 | -24952.98 | 15.44 | -24906.86 | 18.03 | -24859.47 | 21.89 |
| -25142.57 | -0.04 | -25095.10 | 3.90  | -25048.86 | 6.62  | -25000.59 | 11.36 | -24956.23 | 12.20 | -24904.76 | 20.13 | -24859.52 | 21.84 |
| -25143.45 | -0.92 | -25093.87 | 5.14  | -25047.44 | 8.04  | -25003.69 | 8.26  | -24950.83 | 17.59 | -24907.26 | 17.63 | -24859.73 | 21.64 |
| -25142.50 | 0.03  | -25097.02 | 1.99  | -25048.21 | 7.26  | -24998.98 | 12.97 | -24949.77 | 18.65 | -24903.44 | 21.45 | -24858.80 | 22.57 |
| -25142.87 | -0.34 | -25097.70 | 1.30  | -25045.97 | 9.51  | -24999.92 | 12.03 | -24953.30 | 15.12 | -24907.69 | 17.20 | -24856.51 | 24.86 |
| -25143.10 | -0.56 | -25092.74 | 6.27  | -25049.93 | 5.54  | -24998.86 | 13.09 | -24953.46 | 14.96 | -24904.39 | 20.50 | -24861.72 | 19.64 |
| -25143.61 | -1.08 | -25097.46 | 1.54  | -25047.42 | 8.06  | -24999.86 | 12.09 | -24948.33 | 20.09 | -24908.76 | 16.13 | -24854.99 | 26.37 |
| -25142.94 | -0.40 | -25095.68 | 3.33  | -25044.87 | 10.61 | -25002.57 | 9.38  | -24955.48 | 12.94 | -24905.52 | 19.38 | -24859.33 | 22.03 |
| -25142.44 | 0.10  | -25096.95 | 2.06  | -25049.14 | 6.34  | -25000.85 | 11.10 | -24951.53 | 16.89 | -24902.93 | 21.97 | -24858.05 | 23.32 |
| -25143.31 | -0.78 | -25093.85 | 5.15  | -25048.89 | 6.59  | -24995.86 | 16.09 | -24954.67 | 13.75 | -24906.16 | 18.73 | -24860.07 | 21.29 |
| -25142.65 | -0.12 | -25096.06 | 2.94  | -25049.01 | 6.47  | -24999.99 | 11.96 | -24954.31 | 14.11 | -24904.80 | 20.09 | -24861.65 | 19.71 |
| -25142.27 | 0.26  | -25094.79 | 4.21  | -25047.47 | 8.01  | -25001.47 | 10.47 | -24954.59 | 13.83 | -24906.28 | 18.62 | -24857.27 | 24.09 |

|           |       |           |      |           |       |           |       |           |       |           |       |           |       |
|-----------|-------|-----------|------|-----------|-------|-----------|-------|-----------|-------|-----------|-------|-----------|-------|
| -25143.18 | -0.65 | -25095.51 | 3.50 | -25045.87 | 9.61  | -24997.22 | 14.72 | -24949.24 | 19.18 | -24905.47 | 19.42 | -24857.68 | 23.69 |
| -25143.55 | -1.01 | -25096.42 | 2.59 | -25047.08 | 8.40  | -25000.87 | 11.08 | -24908.05 | 60.37 | -24905.36 | 19.53 | -24858.71 | 22.66 |
| -25144.19 | -1.66 | -25095.75 | 3.25 | -25047.66 | 7.82  | -25000.70 | 11.24 | -24953.10 | 15.32 | -24905.77 | 19.12 | -24856.77 | 24.59 |
| -25143.44 | -0.90 | -25095.90 | 3.11 | -25047.16 | 8.32  | -25000.33 | 11.62 | -24950.63 | 17.79 | -24859.27 | 65.62 | -24863.13 | 18.23 |
| -25142.88 | -0.35 | -25096.43 | 2.58 | -25047.28 | 8.19  | -25000.89 | 11.06 | -24951.59 | 16.83 | -24903.91 | 20.99 | -24862.37 | 18.99 |
| -25143.28 | -0.75 | -25095.51 | 3.50 | -25047.13 | 8.35  | -25002.79 | 9.16  | -24951.18 | 17.24 | -24904.24 | 20.65 | -24857.09 | 24.27 |
| -25143.91 | -1.37 | -25093.90 | 5.10 | -25044.43 | 11.04 | -25001.04 | 10.91 | -24947.57 | 20.85 | -24900.42 | 24.48 |           |       |
| -25143.77 | -1.24 | -25096.07 | 2.93 | -25045.46 | 10.01 | -24998.30 | 13.65 | -24954.43 | 13.99 | -24907.10 | 17.79 |           |       |
| -25143.10 | -0.57 | -25095.93 | 3.07 | -25048.09 | 7.39  | -25001.02 | 10.92 | -24955.46 | 12.96 | -24903.58 | 21.31 |           |       |
| -25141.47 | 1.06  | -25094.80 | 4.21 | -25047.27 | 8.20  | -25003.33 | 8.61  | -24950.54 | 17.88 | -24858.05 | 66.85 |           |       |
| -25143.64 | -1.11 | -25095.00 | 4.00 | -25050.55 | 4.93  |           |       | -24950.35 | 18.07 | -24907.67 | 17.23 |           |       |
| -25143.63 | -1.10 | -25092.35 | 6.66 | -25047.24 | 8.24  |           |       | -24944.18 | 24.24 | -24902.16 | 22.74 |           |       |
| -25142.49 | 0.04  | -25095.43 | 3.58 | -25047.25 | 8.23  |           |       | -24952.96 | 15.46 | -24908.26 | 16.63 |           |       |
| -25143.61 | -1.07 | -25094.38 | 4.62 | -25047.63 | 7.85  |           |       |           |       | -24903.76 | 21.14 |           |       |
| -25143.07 | -0.54 | -25097.17 | 1.84 | -25048.62 | 6.86  |           |       |           |       | -24905.00 | 19.90 |           |       |
| -25143.52 | -0.99 | -25095.18 | 3.83 |           |       |           |       |           |       | -24904.20 | 20.69 |           |       |
| -25143.85 | -1.31 | -25094.76 | 4.25 |           |       |           |       |           |       |           |       |           |       |
| -25142.51 | 0.03  |           |      |           |       |           |       |           |       |           |       |           |       |

Average energies

|           |       |           |      |           |      |           |       |           |       |           |       |           |       |
|-----------|-------|-----------|------|-----------|------|-----------|-------|-----------|-------|-----------|-------|-----------|-------|
| -25142.56 | -0.02 | -25094.78 | 4.22 | -25047.04 | 8.44 | -24999.66 | 12.29 | -24951.33 | 17.09 | -24903.13 | 21.76 | -24858.07 | 23.29 |
|-----------|-------|-----------|------|-----------|------|-----------|-------|-----------|-------|-----------|-------|-----------|-------|

## U

concentration in solid solution (%)  
number of atoms

| ground state energy | solid solution energy |           |       |           |       |           |       |           |       |           |       |           |       |
|---------------------|-----------------------|-----------|-------|-----------|-------|-----------|-------|-----------|-------|-----------|-------|-----------|-------|
|                     |                       | 3         | 6     | 9         | 12    | 15        | 18    | 21        |       |           |       |           |       |
|                     |                       | 2         | 4     | 6         | 8     | 10        | 12    | 14        |       |           |       |           |       |
| -25147.30           | 0.26                  | -25104.69 | 4.36  | -25063.26 | 7.27  | -25013.62 | 18.40 | -24975.52 | 18.00 | -24933.84 | 21.16 | -24894.19 | 22.30 |
| -25147.56           | -0.01                 | -25104.77 | 4.27  | -25061.27 | 9.26  | -25019.95 | 12.07 | -24977.12 | 16.39 | -24938.22 | 16.78 | -24892.31 | 24.19 |
| -25148.25           | -0.70                 | -25106.84 | 2.20  | -25062.90 | 7.63  | -25019.66 | 12.37 | -24978.39 | 15.12 | -24936.01 | 18.99 | -24891.54 | 24.95 |
| -25147.50           | 0.05                  | -25104.91 | 4.13  | -25063.76 | 6.77  | -25022.43 | 9.59  | -24976.67 | 16.84 | -24930.46 | 24.54 | -24893.31 | 23.19 |
| -25147.53           | 0.02                  | -25097.34 | 11.70 | -25063.61 | 6.92  | -25021.35 | 10.67 | -24979.84 | 13.67 | -24935.96 | 19.04 | -24892.01 | 24.49 |
| -25146.44           | 1.11                  | -25104.41 | 4.63  | -25060.52 | 10.01 | -25022.38 | 9.64  | -24975.96 | 17.55 | -24938.40 | 16.60 | -24892.55 | 23.94 |
| -25147.10           | 0.45                  | -25106.40 | 2.64  | -25058.48 | 12.05 | -25017.53 | 14.49 | -24979.47 | 14.05 | -24936.82 | 18.18 | -24895.44 | 21.06 |
| -25145.84           | 1.72                  | -25106.87 | 2.18  | -25060.95 | 9.58  | -25015.44 | 16.58 | -24981.22 | 12.29 | -24934.74 | 20.26 | -24895.68 | 20.81 |
| -25147.37           | 0.19                  | -25103.94 | 5.10  | -25061.30 | 9.23  | -25021.84 | 10.18 | -24977.92 | 15.60 | -24937.40 | 17.61 | -24892.41 | 24.08 |
| -25147.58           | -0.03                 | -25105.68 | 3.36  | -25060.47 | 10.06 | -25017.86 | 14.16 | -24977.76 | 15.75 | -24938.57 | 16.43 | -24894.65 | 21.85 |
| -25147.70           | -0.15                 | -25103.04 | 6.01  | -25061.95 | 8.58  | -25017.46 | 14.57 | -24978.21 | 15.30 | -24936.28 | 18.73 | -24896.13 | 20.37 |
| -25148.92           | -1.37                 | -25107.05 | 2.00  | -25062.22 | 8.31  | -25023.28 | 8.74  | -24980.79 | 12.73 | -24936.74 | 18.27 | -24895.41 | 21.09 |
| -25147.21           | 0.35                  | -25105.74 | 3.30  | -25062.83 | 7.70  | -25023.34 | 8.68  | -24978.98 | 14.54 | -24937.57 | 17.44 | -24891.75 | 24.74 |
| -25148.50           | -0.95                 | -25107.07 | 1.97  | -25062.33 | 8.20  | -25019.86 | 12.16 | -24977.52 | 15.99 | -24935.28 | 19.72 | -24890.99 | 25.51 |

|           |       |           |       |           |       |           |       |           |       |           |       |           |       |
|-----------|-------|-----------|-------|-----------|-------|-----------|-------|-----------|-------|-----------|-------|-----------|-------|
| -25148.71 | -1.16 | -25104.57 | 4.47  | -25061.55 | 8.99  | -25018.09 | 13.94 | -24981.44 | 12.07 | -24935.10 | 19.91 | -24895.14 | 21.36 |
| -25147.69 | -0.14 | -25104.94 | 4.11  | -25063.35 | 7.18  | -25015.25 | 16.77 | -24979.16 | 14.35 | -24935.91 | 19.09 | -24899.44 | 17.06 |
| -25148.24 | -0.69 | -25105.90 | 3.14  | -25060.93 | 9.61  | -25018.76 | 13.27 | -24981.12 | 12.39 | -24938.95 | 16.05 | -24891.34 | 25.16 |
| -25147.30 | 0.25  | -25098.81 | 10.24 | -25062.84 | 7.69  | -25020.23 | 11.79 | -24973.03 | 20.49 | -24936.94 | 18.06 | -24893.00 | 23.49 |
| -25148.01 | -0.46 | -25100.18 | 8.86  | -25059.13 | 11.40 | -25015.98 | 16.04 | -24976.95 | 16.56 | -24936.66 | 18.34 | -24896.19 | 20.31 |
| -25148.39 | -0.84 | -25106.18 | 2.86  | -25060.65 | 9.88  | -25019.41 | 12.61 | -24978.02 | 15.49 | -24936.82 | 18.18 | -24886.41 | 30.09 |
| -25147.03 | 0.53  | -25105.05 | 3.99  | -25061.47 | 9.06  | -25020.39 | 11.63 | -24977.95 | 15.57 | -24937.85 | 17.15 | -24894.55 | 21.95 |
| -25147.00 | 0.55  | -25104.75 | 4.29  | -25061.34 | 9.20  | -25021.27 | 10.75 | -24979.11 | 14.40 | -24938.68 | 16.32 | -24892.59 | 23.91 |
| -25140.88 | 6.67  | -25103.20 | 5.85  | -25063.19 | 7.35  | -25020.52 | 11.50 | -24981.15 | 12.36 | -24939.09 | 15.92 | -24894.50 | 22.00 |
| -25148.64 | -1.09 | -25102.78 | 6.26  | -25061.83 | 8.70  | -25018.87 | 13.15 | -24973.06 | 20.46 | -24932.99 | 22.02 | -24893.12 | 23.37 |
| -25146.66 | 0.89  | -25105.59 | 3.45  | -25062.74 | 7.79  | -25021.31 | 10.72 | -24976.59 | 16.92 | -24931.36 | 23.64 | -24889.68 | 26.81 |
| -25147.29 | 0.26  | -25105.51 | 3.53  | -25062.79 | 7.74  | -25020.61 | 11.42 | -24976.23 | 17.28 | -24935.49 | 19.52 | -24893.20 | 23.29 |
| -25147.81 | -0.25 | -25105.95 | 3.09  | -25061.39 | 9.14  | -25022.77 | 9.25  | -24978.25 | 15.27 | -24936.72 | 18.28 | -24894.18 | 22.31 |
| -25147.67 | -0.12 | -25104.00 | 5.05  | -25065.19 | 5.34  | -25021.43 | 10.59 | -24978.67 | 14.84 | -24934.70 | 20.30 | -24898.07 | 18.43 |
| -25139.74 | 7.81  | -25102.77 | 6.27  | -25062.14 | 8.40  | -25022.32 | 9.70  | -24978.98 | 14.54 | -24932.73 | 22.28 | -24895.12 | 21.38 |
| -25147.27 | 0.28  | -25104.87 | 4.18  | -25062.78 | 7.75  | -25017.63 | 14.39 | -24978.89 | 14.63 | -24937.32 | 17.68 | -24892.78 | 23.71 |
| -25140.98 | 6.58  | -25104.35 | 4.69  | -25064.97 | 5.57  | -25017.63 | 14.39 | -24978.85 | 14.66 | -24936.71 | 18.29 | -24893.19 | 23.31 |
| -25140.43 | 7.12  | -25103.70 | 5.34  | -25061.89 | 8.65  | -25019.96 | 12.07 | -24978.67 | 14.84 | -24937.01 | 17.99 | -24894.50 | 21.99 |
| -25148.37 | -0.82 | -25106.08 | 2.96  | -25061.89 | 8.65  | -25014.27 | 17.75 | -24978.54 | 14.97 | -24937.51 | 17.50 | -24885.88 | 30.61 |
| -25140.83 | 6.72  | -25107.31 | 1.74  | -25063.07 | 7.46  | -25016.49 | 15.53 | -24980.71 | 12.81 | -24936.16 | 18.84 | -24895.62 | 20.88 |
| -25145.72 | 1.83  | -25105.00 | 4.04  | -25062.94 | 7.59  | -25018.50 | 13.53 | -24979.79 | 13.72 | -24936.30 | 18.70 | -24892.37 | 24.12 |
| -25147.36 | 0.19  | -25098.66 | 10.38 | -25061.76 | 8.77  | -25019.39 | 12.63 | -24974.94 | 18.57 | -24937.13 | 17.88 | -24892.21 | 24.29 |
| -25147.86 | -0.31 | -25105.08 | 3.97  | -25057.70 | 12.84 | -25017.12 | 14.91 | -24979.95 | 13.56 | -24933.88 | 21.12 | -24894.22 | 22.27 |
| -25148.53 | -0.97 | -25105.03 | 4.01  | -25063.67 | 6.87  | -25020.02 | 12.01 | -24980.39 | 13.12 | -24933.93 | 21.07 | -24893.07 | 23.42 |
| -25148.41 | -0.86 | -25105.63 | 3.41  | -25064.34 | 6.19  | -25020.66 | 11.36 | -24980.02 | 13.49 | -24932.02 | 22.98 | -24897.64 | 18.85 |
| -25146.40 | 1.15  | -25102.98 | 6.07  | -25065.26 | 5.27  | -25018.00 | 14.03 | -24977.11 | 16.40 | -24933.87 | 21.13 | -24891.54 | 24.96 |
| -25146.76 | 0.80  | -25106.08 | 2.96  | -25061.73 | 8.80  | -25015.67 | 16.35 | -24979.50 | 14.01 | -24935.40 | 19.60 | -24892.13 | 24.37 |
| -25146.37 | 1.18  | -25104.14 | 4.90  | -25061.76 | 8.77  | -25020.45 | 11.57 | -24979.72 | 13.80 | -24938.16 | 16.84 | -24890.75 | 25.75 |
| -25146.87 | 0.68  | -25101.29 | 7.75  | -25063.56 | 6.97  | -25019.90 | 12.13 | -24978.96 | 14.55 | -24934.52 | 20.49 | -24894.82 | 21.68 |
| -25145.81 | 1.74  | -25104.12 | 4.92  | -25062.45 | 8.09  | -25021.12 | 10.90 | -24976.98 | 16.53 | -24936.99 | 18.01 | -24895.87 | 20.63 |
| -25148.65 | -1.10 | -25102.99 | 6.06  | -25056.80 | 13.74 | -25020.95 | 11.07 | -24978.15 | 15.37 | -24932.55 | 22.46 | -24894.37 | 22.12 |
| -25147.52 | 0.03  | -25103.87 | 5.18  | -25063.52 | 7.02  | -25020.01 | 12.01 | -24981.14 | 12.38 | -24936.55 | 18.45 | -24893.92 | 22.58 |
| -25148.20 | -0.64 | -25105.99 | 3.05  | -25062.26 | 8.27  | -25022.15 | 9.87  | -24974.76 | 18.75 | -24934.51 | 20.50 | -24896.39 | 20.10 |
| -25146.70 | 0.86  | -25105.37 | 3.68  | -25063.02 | 7.52  | -25018.33 | 13.69 | -24978.41 | 15.11 | -24935.68 | 19.33 | -24896.06 | 20.44 |
| -25148.84 | -1.29 | -25103.86 | 5.18  | -25063.81 | 6.72  | -25019.27 | 12.75 | -24974.81 | 18.70 | -24934.16 | 20.85 | -24895.96 | 20.54 |
| -25148.86 | -1.31 | -25104.16 | 4.88  | -25061.96 | 8.57  | -25023.92 | 8.11  | -24980.84 | 12.68 | -24936.52 | 18.48 | -24890.60 | 25.90 |
| -25145.94 | 1.61  | -25103.33 | 5.71  | -25062.36 | 8.18  | -25018.55 | 13.48 | -24978.17 | 15.34 | -24933.85 | 21.16 | -24893.52 | 22.97 |
| -25146.65 | 0.90  | -25106.62 | 2.42  | -25061.59 | 8.95  | -25022.44 | 9.58  | -24976.09 | 17.43 | -24936.45 | 18.55 | -24892.57 | 23.92 |
| -25148.93 | -1.38 | -25102.85 | 6.19  | -25065.43 | 5.11  | -25018.60 | 13.42 | -24979.54 | 13.98 | -24931.46 | 23.54 | -24894.41 | 22.08 |
| -25148.96 | -1.41 | -25103.04 | 6.01  | -25059.38 | 11.15 | -25021.32 | 10.70 | -24981.02 | 12.49 | -24934.26 | 20.74 | -24893.42 | 23.07 |
| -25146.89 | 0.66  | -25106.08 | 2.96  | -25060.11 | 10.42 | -25020.73 | 11.29 | -24977.30 | 16.21 | -24931.50 | 23.51 | -24895.09 | 21.40 |

|           |       |           |       |           |       |           |       |           |       |           |       |           |       |
|-----------|-------|-----------|-------|-----------|-------|-----------|-------|-----------|-------|-----------|-------|-----------|-------|
| -25147.34 | 0.21  | -25104.98 | 4.06  | -25061.85 | 8.68  | -25018.77 | 13.25 | -24980.24 | 13.28 | -24934.30 | 20.71 | -24895.70 | 20.80 |
| -25147.69 | -0.14 | -25098.93 | 10.11 | -25062.34 | 8.20  | -25013.61 | 18.42 | -24979.00 | 14.52 | -24937.77 | 17.24 | -24892.69 | 23.81 |
| -25147.57 | -0.02 | -25105.30 | 3.74  | -25060.93 | 9.60  | -25024.02 | 8.01  | -24980.14 | 13.37 | -24933.41 | 21.59 | -24894.99 | 21.50 |
| -25147.17 | 0.39  | -25104.89 | 4.16  | -25060.84 | 9.69  | -25020.36 | 11.66 | -24976.31 | 17.20 | -24932.73 | 22.28 | -24897.03 | 19.46 |
| -25148.28 | -0.73 | -25106.49 | 2.56  | -25062.32 | 8.21  | -25024.34 | 7.68  | -24976.84 | 16.68 | -24926.52 | 28.48 | -24889.71 | 26.79 |
| -25147.80 | -0.25 | -25104.61 | 4.43  | -25062.24 | 8.29  | -25021.40 | 10.63 |           |       | -24936.12 | 18.89 | -24894.88 | 21.61 |
| -25149.12 | -1.57 | -25102.71 | 6.33  | -25064.14 | 6.40  | -25022.71 | 9.31  |           |       | -24933.63 | 21.37 | -24892.71 | 23.78 |
| -25148.12 | -0.57 | -25105.56 | 3.49  | -25063.07 | 7.46  |           |       |           |       | -24939.17 | 15.84 | -24895.21 | 21.28 |
| -25146.32 | 1.23  | -25103.11 | 5.93  | -25060.23 | 10.31 |           |       |           |       | -24936.79 | 18.21 | -24897.35 | 19.14 |
| -25148.42 | -0.87 | -25105.28 | 3.76  | -25061.53 | 9.01  |           |       |           |       | -24937.12 | 17.88 | -24895.01 | 21.48 |
| -25146.94 | 0.61  | -25105.34 | 3.70  | -25065.90 | 4.63  |           |       |           |       | -24933.22 | 21.79 | -24887.40 | 29.10 |
| -25147.31 | 0.25  | -25104.93 | 4.11  | -25061.13 | 9.40  |           |       |           |       | -24934.09 | 20.91 | -24895.42 | 21.08 |
| -25147.80 | -0.25 | -25105.14 | 3.90  | -25062.87 | 7.66  |           |       |           |       |           |       |           |       |
| -25147.37 | 0.18  | -25105.26 | 3.78  | -25062.85 | 7.69  |           |       |           |       |           |       |           |       |
| -25149.11 | -1.55 | -25105.75 | 3.29  | -25064.58 | 5.96  |           |       |           |       |           |       |           |       |
| -25148.02 | -0.47 | -25106.44 | 2.61  | -25062.61 | 7.92  |           |       |           |       |           |       |           |       |
| -25148.42 | -0.86 | -25105.32 | 3.72  | -25062.31 | 8.23  |           |       |           |       |           |       |           |       |
| -25148.12 | -0.57 | -25106.78 | 2.26  | -25062.51 | 8.03  |           |       |           |       |           |       |           |       |
| -25148.67 | -1.12 | -25106.73 | 2.31  | -25061.19 | 9.35  |           |       |           |       |           |       |           |       |
| -25148.61 | -1.05 | -25104.90 | 4.15  | -25063.12 | 7.41  |           |       |           |       |           |       |           |       |
| -25148.11 | -0.56 | -25105.83 | 3.21  | -25060.01 | 10.52 |           |       |           |       |           |       |           |       |
| -25147.84 | -0.29 | -25105.44 | 3.61  | -25060.45 | 10.08 |           |       |           |       |           |       |           |       |
| -25146.65 | 0.90  | -25105.40 | 3.64  | -25063.84 | 6.69  |           |       |           |       |           |       |           |       |
| -25146.56 | 1.00  | -25104.54 | 4.50  | -25060.97 | 9.56  |           |       |           |       |           |       |           |       |
| -25148.85 | -1.30 | -25104.99 | 4.05  |           |       |           |       |           |       |           |       |           |       |
| -25148.42 | -0.87 | -25107.09 | 1.95  |           |       |           |       |           |       |           |       |           |       |
| -25147.76 | -0.21 | -25104.49 | 4.56  |           |       |           |       |           |       |           |       |           |       |
| -25148.03 | -0.48 | -25105.51 | 3.53  |           |       |           |       |           |       |           |       |           |       |
|           |       | -25094.51 | 14.53 |           |       |           |       |           |       |           |       |           |       |
|           |       | -25105.45 | 3.59  |           |       |           |       |           |       |           |       |           |       |

Average energies      -25147.23      0.30 -25104.54      4.50 -25062.19      8.34 -25019.88      12.15 -24978.45      15.07 -24935.54      19.47 -24893.75      22.75



# Ca<sub>1-x</sub>M<sub>x</sub>ZrTi<sub>2-2x</sub>Fe<sub>2x</sub>O<sub>7</sub> M=(Ce, Pu, Th, U)

## Ti(1)Ti(2)

N.B. All stated energies are in eV

| Ce                                  | ground    | solid           |                 |                 |                 |                  |                 |       |    |  |    |  |
|-------------------------------------|-----------|-----------------|-----------------|-----------------|-----------------|------------------|-----------------|-------|----|--|----|--|
|                                     | state     | solution        |                 |                 |                 |                  |                 |       |    |  |    |  |
|                                     | energy    | energy          |                 |                 |                 |                  |                 |       |    |  |    |  |
| concentration in solid solution (%) | 3         | 6               | 9               |                 | 12              |                  | 15              |       | 18 |  | 21 |  |
| number of atoms                     | 2         | 4               | 6               |                 | 8               |                  | 10              |       | 12 |  | 13 |  |
|                                     | -25146.04 | -3.15 -25100.84 | -1.12 -25058.60 | -2.06 -25005.60 | 7.77 -24961.17  | 9.03 -24910.30   | 16.72 -24896.11 | 9.33  |    |  |    |  |
|                                     | -25146.60 | -3.71 -25100.18 | -0.46 -25056.59 | -0.05 -25009.25 | 4.12 -24967.82  | 2.37 -24923.17   | 3.86 -24898.22  | 7.22  |    |  |    |  |
|                                     | -25146.91 | -4.02 -25101.17 | -1.46 -25057.28 | -0.74 -25010.56 | 2.81 -24968.60  | 1.60 -24921.31   | 5.71 -24902.94  | 2.50  |    |  |    |  |
|                                     | -25143.93 | -1.04 -25102.47 | -2.75 -25057.53 | -0.99 -25012.33 | 1.04 -24967.62  | 2.57 -24919.34   | 7.69 -24899.80  | 5.64  |    |  |    |  |
|                                     | -25147.79 | -4.90 -25099.87 | -0.15 -25056.20 | 0.34 -25014.25  | -0.88 -24967.52 | 2.68 -24925.96   | 1.06 -24899.54  | 5.90  |    |  |    |  |
|                                     | -25145.64 | -2.75 -25098.81 | 0.90 -25057.00  | -0.45 -25009.72 | 3.65 -25007.88  | -37.69 -24920.15 | 6.87 -24898.41  | 7.02  |    |  |    |  |
|                                     | -25147.53 | -4.64 -25101.28 | -1.56 -25056.28 | 0.26 -25009.62  | 3.75 -24963.77  | 6.43 -24915.10   | 11.92 -24898.45 | 6.99  |    |  |    |  |
|                                     | -25146.72 | -3.83 -25101.71 | -1.99 -25053.99 | 2.55 -25009.19  | 4.18 -24964.95  | 5.25 -24921.30   | 5.72 -24895.23  | 10.21 |    |  |    |  |
|                                     | -25145.89 | -3.01 -25099.23 | 0.49 -25053.60  | 2.94 -25013.34  | 0.03 -24962.13  | 8.07 -24922.00   | 5.02 -24897.65  | 7.79  |    |  |    |  |
|                                     | -25147.40 | -4.51 -25099.23 | 0.48 -25059.03  | -2.49 -25011.26 | 2.11 -24960.62  | 9.57 -24920.80   | 6.22 -24898.76  | 6.67  |    |  |    |  |
|                                     | -25146.74 | -3.86 -25099.76 | -0.04 -25054.43 | 2.11 -25011.33  | 2.04 -24963.16  | 7.04 -24921.59   | 5.43 -24899.85  | 5.58  |    |  |    |  |
|                                     | -25145.42 | -2.54 -25099.64 | 0.08 -25054.96  | 1.58 -25009.81  | 3.56 -25006.12  | -35.93 -24920.69 | 6.34 -24900.97  | 4.47  |    |  |    |  |
|                                     | -25145.76 | -2.87 -25103.14 | -3.43 -25056.81 | -0.27 -25011.82 | 1.55 -24966.86  | 3.34 -24923.48   | 3.54 -24900.06  | 5.37  |    |  |    |  |
|                                     | -25146.94 | -4.06 -25099.78 | -0.07 -25055.31 | 1.23 -25011.13  | 2.24 -24969.79  | 0.41 -24920.67   | 6.35 -24895.82  | 9.62  |    |  |    |  |
|                                     | -25147.15 | -4.26 -25098.93 | 0.78 -25055.71  | 0.84 -25010.30  | 3.07 -24962.74  | 7.45 -24925.86   | 1.16 -24897.87  | 7.57  |    |  |    |  |
|                                     | -25146.51 | -3.62 -25101.58 | -1.86 -25055.53 | 1.01 -25012.13  | 1.24 -24968.94  | 1.26 -24919.16   | 7.87 -24893.13  | 12.30 |    |  |    |  |
|                                     | -25145.91 | -3.02 -25100.53 | -0.82 -25052.84 | 3.70 -25011.78  | 1.58 -24965.06  | 5.13 -24918.45   | 8.57 -24895.15  | 10.28 |    |  |    |  |
|                                     | -25146.75 | -3.86 -25100.13 | -0.41 -25052.20 | 4.34 -25005.05  | 8.32 -24959.22  | 10.98 -24918.91  | 8.12 -24899.21  | 6.22  |    |  |    |  |
|                                     | -25145.88 | -2.99 -25101.27 | -1.56 -25052.54 | 4.00 -25009.04  | 4.33 -24965.37  | 4.82 -24920.32   | 6.70 -24890.07  | 15.36 |    |  |    |  |
|                                     | -25146.50 | -3.61 -25101.81 | -2.09 -25055.90 | 0.65 -25013.03  | 0.34 -24969.31  | 0.88 -24922.87   | 4.15 -24900.43  | 5.00  |    |  |    |  |
|                                     | -25147.29 | -4.40 -25100.41 | -0.70 -25055.24 | 1.30 -25010.87  | 2.50 -24964.55  | 5.65 -24922.78   | 4.24 -24899.47  | 5.96  |    |  |    |  |
|                                     | -25147.75 | -4.86 -25101.17 | -1.46 -25053.11 | 3.44 -25012.20  | 1.17 -24967.57  | 2.63 -24923.30   | 3.73 -24901.37  | 4.07  |    |  |    |  |
|                                     | -25146.92 | -4.03 -25101.46 | -1.75 -25054.89 | 1.65 -25011.56  | 1.81 -24958.38  | 11.82 -24919.79  | 7.24 -24900.69  | 4.75  |    |  |    |  |
|                                     | -25146.80 | -3.91 -25101.93 | -2.21 -25057.11 | -0.56 -25007.68 | 5.68 -24964.40  | 5.80 -24921.71   | 5.32 -24890.89  | 14.55 |    |  |    |  |
|                                     | -25147.19 | -4.30 -25100.58 | -0.86 -25056.31 | 0.23 -25008.18  | 5.19 -24965.18  | 5.02 -24917.89   | 9.14 -24894.10  | 11.33 |    |  |    |  |
|                                     | -25145.35 | -2.47 -25100.35 | -0.64 -25055.82 | 0.73 -25011.70  | 1.67 -24965.30  | 4.90 -24922.96   | 4.06 -24893.04  | 12.39 |    |  |    |  |
|                                     | -25146.94 | -4.05 -25102.23 | -2.51 -25056.30 | 0.24 -25006.59  | 6.78 -24960.24  | 9.95 -24924.04   | 2.98 -24896.22  | 9.22  |    |  |    |  |
|                                     | -25146.39 | -3.50 -25103.04 | -3.32 -25053.27 | 3.27 -25008.39  | 4.98 -24967.29  | 2.90 -24923.03   | 3.99 -24896.81  | 8.63  |    |  |    |  |
|                                     | -25146.80 | -3.91 -25100.80 | -1.08 -25056.88 | -0.34 -25014.71 | -1.35 -24966.77 | 3.43 -24917.70   | 9.33 -24894.54  | 10.89 |    |  |    |  |

|           |       |           |       |           |       |           |       |           |       |           |       |           |       |
|-----------|-------|-----------|-------|-----------|-------|-----------|-------|-----------|-------|-----------|-------|-----------|-------|
| -25144.88 | -1.99 | -25102.17 | -2.46 | -25056.21 | 0.33  | -25011.92 | 1.45  | -24969.90 | 0.30  | -24921.20 | 5.83  | -24898.48 | 6.96  |
| -25145.69 | -2.80 | -25099.74 | -0.03 | -25057.07 | -0.53 | -25008.32 | 5.05  | -24965.79 | 4.40  | -24918.72 | 8.30  | -24902.15 | 3.28  |
| -25148.25 | -5.36 | -25098.46 | 1.25  | -25056.16 | 0.39  | -25013.00 | 0.37  | -24966.09 | 4.11  | -24918.75 | 8.27  | -24899.77 | 5.67  |
| -25146.41 | -3.52 | -25102.09 | -2.38 | -25057.76 | -1.22 | -25011.82 | 1.54  | -24968.96 | 1.24  | -24910.40 | 16.63 | -24898.88 | 6.56  |
| -25146.94 | -4.05 | -25100.51 | -0.79 | -25055.74 | 0.80  | -25010.24 | 3.13  | -24968.65 | 1.54  | -24923.41 | 3.61  | -24891.31 | 14.13 |
| -25146.18 | -3.29 | -25102.24 | -2.53 | -25056.83 | -0.29 | -25012.23 | 1.14  | -24966.59 | 3.60  | -24916.80 | 10.23 | -24896.41 | 9.03  |
| -25146.31 | -3.43 | -25101.28 | -1.56 | -25054.38 | 2.16  | -25011.72 | 1.65  | -24963.85 | 6.35  | -24917.45 | 9.57  | -24901.69 | 3.75  |
| -25147.03 | -4.14 | -25100.75 | -1.04 | -25056.99 | -0.44 | -25010.00 | 3.37  | -24965.32 | 4.88  | -24920.25 | 6.77  | -24897.88 | 7.56  |
| -25146.73 | -3.84 | -25100.97 | -1.26 | -25057.81 | -1.27 | -25013.25 | 0.12  | -24967.11 | 3.09  | -24918.56 | 8.46  | -24903.22 | 2.22  |
| -25146.19 | -3.30 | -25102.80 | -3.08 | -25055.24 | 1.30  | -25011.77 | 1.60  | -24967.51 | 2.68  | -24920.13 | 6.89  | -24895.84 | 9.60  |
| -25146.03 | -3.14 | -25101.76 | -2.04 | -25055.76 | 0.78  | -25013.19 | 0.18  | -24967.24 | 2.95  | -24921.49 | 5.53  | -24901.28 | 4.16  |
| -25146.56 | -3.67 | -25101.70 | -1.98 | -25056.21 | 0.33  | -25012.94 | 0.42  | -24966.55 | 3.64  | -24922.94 | 4.08  | -24896.11 | 9.32  |
| -25145.35 | -2.46 | -25100.51 | -0.79 | -25056.73 | -0.19 | -25009.34 | 4.03  | -24967.06 | 3.13  | -24923.09 | 3.93  | -24896.83 | 8.61  |
| -25147.25 | -4.36 | -25101.76 | -2.05 | -25056.85 | -0.31 | -25012.63 | 0.74  | -24967.81 | 2.39  | -24921.15 | 5.87  | -24892.99 | 12.45 |
| -25146.17 | -3.28 | -25102.03 | -2.32 | -25056.81 | -0.27 | -25010.50 | 2.87  | -24968.66 | 1.54  | -24922.29 | 4.73  | -24899.87 | 5.56  |
| -25146.86 | -3.97 | -25103.50 | -3.78 | -25029.09 | 27.45 | -25011.32 | 2.05  | -24966.23 | 3.96  | -24916.94 | 10.08 | -24893.82 | 11.61 |
| -25146.28 | -3.39 | -25101.06 | -1.35 | -25058.56 | -2.02 | -25011.87 | 1.50  | -24967.28 | 2.92  | -24923.92 | 3.11  | -24898.77 | 6.67  |
| -25145.86 | -2.97 | -25101.28 | -1.56 | -25052.47 | 4.07  | -25012.40 | 0.97  | -24967.93 | 2.27  | -24918.76 | 8.26  | -24896.21 | 9.22  |
| -25145.98 | -3.09 | -25101.46 | -1.74 | -25055.07 | 1.47  | -25013.28 | 0.09  | -24968.66 | 1.53  | -24923.46 | 3.56  | -24899.72 | 5.72  |
| -25145.49 | -2.60 | -25099.77 | -0.06 | -25055.37 | 1.18  | -25013.87 | -0.50 | -24968.97 | 1.23  | -24920.09 | 6.93  | -24903.66 | 1.78  |
| -25145.68 | -2.79 | -25101.65 | -1.94 | -25056.64 | -0.09 | -25010.45 | 2.92  | -24964.70 | 5.49  | -24923.03 | 3.99  | -24897.42 | 8.02  |
| -25145.99 | -3.11 | -25101.31 | -1.59 | -25056.48 | 0.07  | -25014.19 | -0.82 | -24967.07 | 3.13  | -24925.97 | 1.05  | -24901.14 | 4.30  |
| -25146.19 | -3.30 | -25101.76 | -2.04 | -25056.85 | -0.31 | -25004.21 | 9.16  | -24961.18 | 9.02  | -24917.71 | 9.32  | -24896.91 | 8.52  |
| -25146.02 | -3.13 | -25102.06 | -2.35 | -25055.25 | 1.29  | -25012.07 | 1.30  | -24967.48 | 2.71  | -24921.56 | 5.46  | -24897.37 | 8.06  |
| -25146.22 | -3.33 | -25100.98 | -1.26 | -25056.01 | 0.53  | -25013.37 | 0.00  | -24959.51 | 10.68 | -24921.29 | 5.73  | -24898.68 | 6.75  |
| -25146.93 | -4.04 | -25098.31 | 1.40  | -25058.04 | -1.49 | -25005.64 | 7.73  | -24966.18 | 4.02  | -24921.83 | 5.19  | -24900.22 | 5.21  |
| -25145.77 | -2.88 | -25100.66 | -0.95 | -25056.29 | 0.25  | -25009.71 | 3.66  | -24964.92 | 5.27  | -24921.03 | 6.00  | -24895.95 | 9.49  |
| -25146.49 | -3.60 | -25102.12 | -2.40 | -25057.11 | -0.57 | -25011.69 | 1.68  | -24966.64 | 3.55  | -24918.85 | 8.18  | -24897.34 | 8.09  |
| -25144.21 | -1.32 | -25101.13 | -1.41 | -25057.63 | -1.08 | -25012.40 | 0.96  | -24964.31 | 5.88  | -24922.06 | 4.96  | -24900.16 | 5.28  |
| -25146.06 | -3.17 | -25098.50 | 1.22  | -25057.32 | -0.78 | -25012.10 | 1.27  | -24960.77 | 9.43  | -24924.34 | 2.69  | -24900.91 | 4.53  |
| -25146.64 | -3.75 | -25100.57 | -0.85 | -25054.33 | 2.22  | -25007.14 | 6.23  | -24964.73 | 5.46  | -24920.45 | 6.57  | -24898.44 | 6.99  |
| -25146.87 | -3.98 | -25100.87 | -1.16 | -25047.29 | 9.25  | -25010.01 | 3.36  | -24965.68 | 4.52  | -24917.64 | 9.38  | -24896.25 | 9.18  |
| -25145.98 | -3.09 | -25100.31 | -0.59 | -25057.81 | -1.26 | -25010.41 | 2.96  | -24968.42 | 1.78  | -24924.34 | 2.69  | -24899.78 | 5.66  |
| -25146.74 | -3.85 | -25102.92 | -3.20 | -25057.15 | -0.60 | -25012.22 | 1.15  | -24966.10 | 4.10  | -24919.21 | 7.81  | -24895.34 | 10.09 |
| -25147.59 | -4.70 | -25100.70 | -0.98 | -25051.63 | 4.91  | -25009.98 | 3.39  | -24965.82 | 4.37  | -24922.29 | 4.73  | -24898.15 | 7.29  |
| -25146.17 | -3.29 | -25099.86 | -0.15 | -25055.41 | 1.14  | -25011.18 | 2.19  | -24968.34 | 1.86  | -24924.31 | 2.71  | -24901.15 | 4.28  |
| -25147.18 | -4.29 | -25100.83 | -1.11 | -25055.29 | 1.25  | -25011.93 | 1.44  | -24966.60 | 3.60  | -24920.15 | 6.88  | -24899.36 | 6.07  |
| -25146.81 | -3.92 | -25099.97 | -0.26 | -25059.03 | -2.49 | -25010.92 | 2.45  | -24966.50 | 3.69  | -24921.00 | 6.02  | -24897.84 | 7.60  |
| -25143.45 | -0.56 | -25101.47 | -1.75 | -25056.03 | 0.51  | -25014.00 | -0.63 | -24918.11 | 52.09 | -24914.57 | 12.45 | -24902.29 | 3.14  |
| -25143.94 | -1.05 | -25102.52 | -2.81 | -25056.22 | 0.32  | -24964.18 | 49.18 | -24965.52 | 4.68  | -24898.41 | 28.61 | -24900.81 | 4.63  |
| -25145.07 | -2.18 | -25101.48 | -1.76 | -25057.22 | -0.68 | -25012.55 | 0.82  | -24966.92 | 3.28  | -24925.63 | 1.39  | -24893.26 | 12.17 |

|           |       |           |       |           |       |           |       |           |       |           |       |           |       |
|-----------|-------|-----------|-------|-----------|-------|-----------|-------|-----------|-------|-----------|-------|-----------|-------|
| -25146.35 | -3.46 | -25100.68 | -0.96 | -25057.06 | -0.52 | -25012.01 | 1.36  | -24970.78 | -0.58 | -24921.34 | 5.68  | -24902.48 | 2.95  |
| -25146.44 | -3.55 | -25102.06 | -2.35 | -25056.15 | 0.39  | -25013.43 | -0.06 | -24967.86 | 2.33  | -24920.46 | 6.56  | -24898.82 | 6.61  |
| -25147.25 | -4.36 | -25100.98 | -1.26 | -25049.29 | 7.25  | -25007.51 | 5.85  | -24963.78 | 6.41  | -24920.05 | 6.97  | -24895.37 | 10.07 |
| -25146.24 | -3.35 | -25101.51 | -1.79 | -25053.69 | 2.85  | -25009.83 | 3.54  | -24959.99 | 10.20 | -24919.58 | 7.45  | -24903.97 | 1.46  |
| -25147.35 | -4.46 | -25101.15 | -1.44 | -25056.53 | 0.01  | -25013.27 | 0.09  | -24967.25 | 2.95  | -24924.04 | 2.98  | -24899.55 | 5.89  |
| -25146.74 | -3.86 | -25097.41 | 2.30  | -25056.22 | 0.32  | -25010.45 | 2.92  | -24966.03 | 4.17  | -24917.91 | 9.11  | -24902.87 | 2.57  |
| -25145.47 | -2.59 | -25098.91 | 0.81  | -25057.49 | -0.95 | -25014.59 | -1.22 | -24963.34 | 6.86  | -24917.39 | 9.64  | -24900.95 | 4.49  |
| -25148.20 | -5.31 | -25102.34 | -2.63 | -25058.24 | -1.70 | -25008.87 | 4.49  | -24966.10 | 4.10  | -24924.30 | 2.72  | -24896.27 | 9.17  |
| -25147.36 | -4.47 | -25100.25 | -0.54 | -25055.32 | 1.22  | -25008.79 | 4.58  | -24967.77 | 2.43  | -24917.95 | 9.07  | -24896.80 | 8.63  |
| -25144.83 | -1.94 | -25100.02 | -0.30 | -25053.60 | 2.94  | -25011.47 | 1.89  | -24968.30 | 1.90  | -24916.43 | 10.60 | -24904.22 | 1.22  |
| -25146.58 | -3.69 | -25100.15 | -0.44 | -25054.51 | 2.03  | -25010.52 | 2.85  | -24967.72 | 2.48  | -24923.01 | 4.01  | -24894.75 | 10.69 |
| -25146.62 | -3.73 | -25101.89 | -2.17 | -25057.31 | -0.77 | -25012.94 | 0.43  | -24966.42 | 3.77  | -24902.83 | 24.20 | -24896.17 | 9.27  |
| -25146.57 | -3.68 | -25102.62 | -2.90 | -25054.68 | 1.86  | -25008.81 | 4.56  | -24959.79 | 10.41 | -24918.64 | 8.38  | -24899.85 | 5.59  |
| -25146.11 | -3.22 | -25099.98 | -0.27 | -25056.32 | 0.22  | -25009.23 | 4.14  | -24965.14 | 5.06  | -24916.23 | 10.80 | -24897.45 | 7.98  |
| -25145.22 | -2.33 | -25101.48 | -1.77 | -25056.98 | -0.43 | -25009.74 | 3.63  | -24966.54 | 3.66  | -24923.55 | 3.47  | -24901.89 | 3.55  |
| -25146.56 | -3.67 | -25098.07 | 1.64  | -25057.46 | -0.92 | -25004.39 | 8.98  | -24965.87 | 4.33  | -24922.07 | 4.95  | -24904.73 | 0.71  |
| -25146.94 | -4.05 | -25099.73 | -0.01 | -25056.49 | 0.06  | -25014.06 | -0.69 | -24963.88 | 6.31  | -24923.47 | 3.55  | -24901.15 | 4.29  |
| -25145.80 | -2.91 | -25100.84 | -1.12 | -25053.29 | 3.25  | -25010.82 | 2.55  | -24965.26 | 4.93  | -24917.41 | 9.61  | -24899.73 | 5.71  |
| -25145.07 | -2.18 | -25099.55 | 0.17  | -25057.48 | -0.93 | -25011.51 | 1.86  | -24968.05 | 2.15  | -24924.54 | 2.48  | -24896.92 | 8.52  |
| -25144.76 | -1.87 | -25098.09 | 1.63  | -25057.27 | -0.73 | -25008.59 | 4.78  | -24960.91 | 9.28  | -24919.80 | 7.23  | -24899.10 | 6.34  |
| -25145.64 | -2.75 | -25101.47 | -1.76 | -25055.29 | 1.25  | -25008.55 | 4.82  | -24967.87 | 2.33  | -24917.58 | 9.44  | -24899.08 | 6.35  |
| -25146.57 | -3.68 | -25099.01 | 0.70  | -25055.33 | 1.21  | -25011.81 | 1.56  | -24968.60 | 1.60  | -24915.98 | 11.04 | -24895.38 | 10.05 |
| -25146.42 | -3.53 | -25100.19 | -0.47 | -25057.08 | -0.54 | -25010.80 | 2.57  | -24965.83 | 4.37  | -24923.66 | 3.37  | -24896.43 | 9.01  |
| -25144.19 | -1.31 | -25101.28 | -1.56 | -25058.01 | -1.47 | -25010.61 | 2.76  | -24965.72 | 4.47  | -24925.74 | 1.28  | -24898.81 | 6.63  |
| -25146.43 | -3.55 | -25101.18 | -1.46 | -25057.35 | -0.81 | -25003.01 | 10.36 | -24964.49 | 5.70  | -24917.53 | 9.50  | -24890.94 | 14.49 |
| -25146.82 | -3.93 | -25099.57 | 0.14  | -25052.50 | 4.04  | -25013.63 | -0.26 | -24963.63 | 6.56  | -24926.02 | 1.00  | -24894.88 | 10.55 |
| -25146.76 | -3.87 | -25101.17 | -1.46 | -25055.92 | 0.62  | -25014.05 | -0.68 | -24968.65 | 1.54  | -24923.88 | 3.14  | -24899.19 | 6.25  |
| -25146.14 | -3.25 | -25099.73 | -0.01 | -25056.71 | -0.17 | -25010.77 | 2.60  | -24967.90 | 2.29  | -24919.01 | 8.01  | -24897.70 | 7.73  |
| -25143.56 | -0.67 | -25102.26 | -2.55 | -25056.74 | -0.19 | -25011.81 | 1.56  | -24961.55 | 8.64  | -24924.32 | 2.70  | -24898.99 | 6.44  |
| -25146.53 | -3.64 | -25100.55 | -0.84 | -25055.90 | 0.64  | -25012.56 | 0.81  | -24967.38 | 2.82  | -24924.79 | 2.23  | -24894.47 | 10.97 |
| -25146.96 | -4.07 | -25099.57 | 0.15  | -25056.07 | 0.48  | -25009.34 | 4.03  | -24968.52 | 1.68  | -24917.18 | 9.85  | -24899.60 | 5.84  |
| -25146.50 | -3.61 | -25102.06 | -2.34 | -25055.11 | 1.43  | -25011.72 | 1.65  | -24964.72 | 5.47  | -24921.62 | 5.40  | -24900.25 | 5.19  |
| -25147.13 | -4.24 | -25100.44 | -0.73 | -25056.16 | 0.38  | -25008.54 | 4.83  | -24968.97 | 1.23  | -24918.48 | 8.54  | -24893.42 | 12.01 |
| -25145.19 | -2.30 | -25099.24 | 0.47  | -25053.93 | 2.61  | -25010.31 | 3.06  | -24965.10 | 5.09  | -24919.67 | 7.35  | -24899.53 | 5.90  |
| -25146.54 | -3.65 | -25101.50 | -1.78 | -25056.08 | 0.47  | -25006.93 | 6.44  | -24963.26 | 6.93  | -24922.76 | 4.26  | -24900.51 | 4.93  |
| -25147.11 | -4.22 | -25100.86 | -1.14 | -25057.79 | -1.25 | -25012.12 | 1.25  | -24963.02 | 7.18  | -24920.57 | 6.45  | -24896.82 | 8.61  |
| -25146.11 | -3.22 | -25100.46 | -0.74 | -25057.14 | -0.60 | -25006.58 | 6.79  | -24968.86 | 1.34  | -24923.02 | 4.01  | -24901.94 | 3.49  |
| -25143.74 | -0.85 | -25101.47 | -1.75 | -25057.98 | -1.44 | -25009.59 | 3.78  | -24964.30 | 5.89  | -24922.05 | 4.98  | -24898.28 | 7.15  |
| -25146.82 | -3.93 | -25102.54 | -2.83 | -25054.71 | 1.83  | -25010.21 | 3.16  | -24967.52 | 2.68  | -24920.24 | 6.78  | -24900.69 | 4.75  |
| -25147.63 | -4.74 | -25100.92 | -1.21 | -25054.45 | 2.09  | -25008.87 | 4.50  | -24956.80 | 13.39 | -24924.22 | 2.80  | -24896.27 | 9.17  |
| -25146.83 | -3.94 | -25101.76 | -2.05 | -25054.83 | 1.71  | -25010.55 | 2.82  | -24967.16 | 3.04  | -24922.61 | 4.41  | -24898.63 | 6.80  |

|           |       |           |       |           |       |           |       |           |       |           |       |           |        |
|-----------|-------|-----------|-------|-----------|-------|-----------|-------|-----------|-------|-----------|-------|-----------|--------|
| -25146.99 | -4.10 | -25101.03 | -1.32 | -25058.42 | -1.88 | -24967.66 | 45.71 | -24923.11 | 47.08 | -24919.15 | 7.87  | -24893.73 | 11.70  |
| -25145.89 | -3.00 | -25101.61 | -1.90 | -25055.10 | 1.45  | -25008.50 | 4.87  | -24968.75 | 1.44  | -24899.96 | 27.06 | -24889.54 | 15.90  |
| -25147.04 | -4.15 | -25102.25 | -2.54 | -25058.09 | -1.55 | -25011.50 | 1.87  | -24969.82 | 0.38  | -24922.46 | 4.56  | -24938.90 | -33.46 |
| -25146.53 | -3.65 | -25101.94 | -2.22 | -25053.90 | 2.65  | -25014.49 | -1.12 | -24967.74 | 2.45  | -24919.69 | 7.33  |           |        |
| -25145.29 | -2.40 | -25102.30 | -2.58 | -25058.22 | -1.67 | -25011.38 | 1.99  | -24960.26 | 9.93  | -24918.94 | 8.08  |           |        |
| -25146.09 | -3.20 | -25101.74 | -2.02 | -25057.06 | -0.51 | -25010.89 | 2.48  | -24966.51 | 3.69  | -24917.34 | 9.69  |           |        |
|           |       | -25100.44 | -0.72 | -25056.55 | -0.01 |           |       |           |       | -24923.48 | 3.54  |           |        |
|           |       | -25101.83 | -2.12 | -25054.68 | 1.86  |           |       |           |       |           |       |           |        |
|           |       |           |       | -25057.48 | -0.94 |           |       |           |       |           |       |           |        |

Average energies      -25146.29      -3.40      -25100.90      -1.19      -25055.69      0.85      -25009.97      3.40      -24965.70      4.50      -24920.28      6.74      -24898.47      6.97

ground      solid  
state      solution  
energy      energy

## Pu

concentration in solid solution (%)  
number of atoms

|           | 3     | 6         | 9     | 12        | 15    | 18        | 21    |           |       |           |       |           |       |
|-----------|-------|-----------|-------|-----------|-------|-----------|-------|-----------|-------|-----------|-------|-----------|-------|
|           | 2     | 4         | 6     | 8         | 10    | 12        | 13    |           |       |           |       |           |       |
| -25108.20 | 28.70 | -25057.67 | 30.07 | -25007.71 | 30.87 | -24954.72 | 34.71 | -24911.16 | 29.11 | -24859.55 | 31.55 | -24828.63 | 37.90 |
| -25107.55 | 29.35 | -25057.69 | 30.06 | -25007.99 | 30.59 | -24960.78 | 28.65 | -24908.36 | 31.91 | -24854.23 | 36.88 | -24833.80 | 32.73 |
| -25108.17 | 28.73 | -25060.00 | 27.74 | -24961.42 | 77.17 | -24912.24 | 77.19 | -24857.34 | 82.93 | -24832.77 | 58.34 | -24827.98 | 38.55 |
| -25110.36 | 26.54 | -25058.02 | 29.72 | -25007.11 | 31.47 | -24955.51 | 33.92 | -24909.34 | 30.93 | -24859.58 | 31.53 | -24833.78 | 32.75 |
| -25109.10 | 27.80 | -25058.76 | 28.99 | -25011.57 | 27.02 | -24961.44 | 27.99 | -24911.65 | 28.62 | -24861.20 | 29.91 | -24836.61 | 29.92 |
| -25107.35 | 29.55 | -25058.91 | 28.84 | -25010.57 | 28.01 | -24958.56 | 30.87 | -24910.53 | 29.74 | -24858.68 | 32.43 | -24828.19 | 38.34 |
| -25108.67 | 28.24 | -25058.13 | 29.61 | -25010.42 | 28.17 | -24957.45 | 31.98 | -24904.44 | 35.83 | -24855.35 | 35.76 | -24835.93 | 30.60 |
| -25109.63 | 27.27 | -25060.00 | 27.74 | -25008.50 | 30.09 | -24959.04 | 30.39 | -24912.00 | 28.27 | -24857.23 | 33.88 | -24830.46 | 36.07 |
| -25109.81 | 27.10 | -25061.49 | 26.26 | -25002.60 | 35.99 | -24961.26 | 28.16 | -24903.94 | 36.33 | -24858.68 | 32.43 | -24831.82 | 34.71 |
| -25108.95 | 27.95 | -25058.83 | 28.92 | -25010.83 | 27.76 | -24936.85 | 52.57 | -24909.81 | 30.46 | -24860.87 | 30.24 | -24839.15 | 27.38 |
| -25109.84 | 27.06 | -25059.73 | 28.01 | -25007.20 | 31.39 | -24959.28 | 30.15 | -24907.96 | 32.31 | -24855.66 | 35.45 | -24832.46 | 34.07 |
| -25109.73 | 27.18 | -25059.27 | 28.48 | -25009.79 | 28.79 | -24959.18 | 30.24 | -24910.12 | 30.15 | -24857.34 | 33.77 | -24833.95 | 32.58 |
| -25109.46 | 27.44 | -25059.20 | 28.54 | -25007.80 | 30.78 | -24956.71 | 32.72 | -24908.70 | 31.57 | -24849.90 | 41.21 | -24832.35 | 34.18 |
| -25110.00 | 26.90 | -25060.18 | 27.57 | -25008.16 | 30.43 | -24958.01 | 31.42 | -24910.23 | 30.03 | -24856.00 | 35.11 | -24833.33 | 33.20 |
| -25096.34 | 40.57 | -25059.88 | 27.86 | -25008.38 | 30.21 | -24962.01 | 27.42 | -24909.62 | 30.65 | -24860.29 | 30.82 | -24838.21 | 28.32 |
| -25109.43 | 27.47 | -25059.07 | 28.68 | -25008.13 | 30.45 | -24958.57 | 30.86 | -24905.48 | 34.79 | -24856.75 | 34.36 | -24834.07 | 32.46 |
| -25109.68 | 27.22 | -25056.40 | 31.34 | -25009.36 | 29.23 | -24958.94 | 30.48 | -24910.84 | 29.42 | -24860.65 | 30.46 | -24834.57 | 31.96 |
| -25110.36 | 26.54 | -25057.36 | 30.38 | -24992.66 | 45.93 | -24960.93 | 28.49 | -24909.62 | 30.65 | -24855.62 | 35.49 | -24830.02 | 36.51 |
| -25109.89 | 27.01 | -25059.25 | 28.49 | -25009.63 | 28.95 | -24959.51 | 29.92 | -24907.92 | 32.35 | -24861.61 | 29.50 | -24835.37 | 31.16 |
| -25107.91 | 29.00 | -25059.65 | 28.10 | -25006.49 | 32.10 | -24960.28 | 29.15 | -24909.32 | 30.95 | -24857.82 | 33.29 | -24834.91 | 31.62 |
| -25110.15 | 26.75 | -25057.94 | 29.80 | -25010.37 | 28.22 | -24959.10 | 30.33 | -24906.37 | 33.90 | -24856.63 | 34.48 | -24832.94 | 33.59 |
| -25108.20 | 28.70 | -25058.59 | 29.15 | -25008.49 | 30.09 | -24960.31 | 29.12 | -24904.83 | 35.44 | -24859.25 | 31.86 | -24831.41 | 35.12 |
| -25108.91 | 27.99 | -25060.00 | 27.74 | -25006.28 | 32.31 | -24959.46 | 29.97 | -24906.95 | 33.32 | -24859.67 | 31.44 | -24826.54 | 39.99 |

|           |                 |                 |                 |                 |                 |                 |       |
|-----------|-----------------|-----------------|-----------------|-----------------|-----------------|-----------------|-------|
| -25108.85 | 28.05 -25056.37 | 31.37 -25007.02 | 31.56 -24961.63 | 27.79 -24912.46 | 27.81 -24857.62 | 33.49 -24830.66 | 35.87 |
| -25108.93 | 27.97 -25056.00 | 31.74 -25009.52 | 29.06 -24950.19 | 39.24 -24905.70 | 34.57 -24860.55 | 30.56 -24821.92 | 44.61 |
| -25107.94 | 28.97 -25059.52 | 28.23 -25009.62 | 28.97 -24961.09 | 28.33 -24908.65 | 31.62 -24851.01 | 40.10 -24834.16 | 32.37 |
| -25108.77 | 28.13 -25058.67 | 29.07 -25011.37 | 27.21 -24958.72 | 30.70 -24912.56 | 27.71 -24856.26 | 34.85 -24838.14 | 28.39 |
| -25107.34 | 29.56 -25054.81 | 32.93 -25007.92 | 30.67 -24960.33 | 29.09 -24908.09 | 32.18 -24861.16 | 29.95 -24836.08 | 30.45 |
| -25107.98 | 28.92 -25060.27 | 27.48 -25005.95 | 32.63 -24961.14 | 28.28 -24908.03 | 32.24 -24858.78 | 32.33 -24824.94 | 41.59 |
| -25109.88 | 27.02 -25057.72 | 30.03 -25009.73 | 28.85 -24961.67 | 27.76 -24904.37 | 35.90 -24851.66 | 39.45 -24832.69 | 33.84 |
| -25109.89 | 27.02 -25059.84 | 27.90 -25010.84 | 27.74 -24956.94 | 32.49 -24912.17 | 28.10 -24860.23 | 30.88 -24833.98 | 32.55 |
| -25108.42 | 28.48 -25059.59 | 28.16 -25003.86 | 34.73 -24959.91 | 29.52 -24911.36 | 28.90 -24852.16 | 38.95 -24828.61 | 37.92 |
| -25109.62 | 27.28 -25059.57 | 28.18 -25010.08 | 28.50 -24956.71 | 32.72 -24903.20 | 37.07 -24852.70 | 38.41 -24832.85 | 33.68 |
| -25107.12 | 29.78 -25059.49 | 28.26 -25010.51 | 28.08 -24958.43 | 31.00 -24912.56 | 27.70 -24861.63 | 29.48 -24834.13 | 32.40 |
| -25110.02 | 26.88 -25059.62 | 28.13 -25007.17 | 31.42 -24956.86 | 32.57 -24901.24 | 39.03 -24841.93 | 49.18 -24831.56 | 34.97 |
| -25109.21 | 27.69 -25059.81 | 27.94 -25004.73 | 33.85 -24961.98 | 27.45 -24910.23 | 30.04 -24857.16 | 33.95 -24833.94 | 32.59 |
| -25108.54 | 28.37 -25059.06 | 28.68 -25008.17 | 30.41 -24957.93 | 31.50 -24904.54 | 35.73 -24861.16 | 29.95 -24836.92 | 29.61 |
| -25109.00 | 27.90 -25060.07 | 27.67 -25005.61 | 32.97 -24954.13 | 35.30 -24907.99 | 32.28 -24860.58 | 30.53 -24826.38 | 40.15 |
| -25109.80 | 27.10 -25059.50 | 28.24 -25007.52 | 31.07 -24960.99 | 28.43 -24908.46 | 31.81 -24856.28 | 34.83 -24838.74 | 27.79 |
| -25109.39 | 27.51 -25058.23 | 29.52 -25009.23 | 29.35 -24958.48 | 30.95 -24909.93 | 30.34 -24860.89 | 30.22 -24834.29 | 32.24 |
| -25109.55 | 27.36 -25058.54 | 29.21 -25009.83 | 28.75 -24959.19 | 30.24 -24909.87 | 30.40 -24856.13 | 34.98 -24836.01 | 30.52 |
| -25109.86 | 27.04 -25059.88 | 27.87 -25008.95 | 29.64 -24959.59 | 29.84 -24908.59 | 31.68 -24861.98 | 29.13 -24837.64 | 28.89 |
| -25109.10 | 27.80 -25055.53 | 32.21 -25010.62 | 27.96 -24958.25 | 31.18 -24909.02 | 31.25 -24858.18 | 32.93 -24829.38 | 37.15 |
| -25109.93 | 26.98 -25055.64 | 32.11 -25008.65 | 29.94 -24962.58 | 26.85 -24907.57 | 32.70 -24861.50 | 29.61 -24838.94 | 27.60 |
| -25108.74 | 28.17 -25059.98 | 27.76 -25008.49 | 30.10 -24960.05 | 29.38 -24910.33 | 29.94 -24857.74 | 33.37 -24834.94 | 31.59 |
| -25109.25 | 27.65 -25058.05 | 29.69 -25007.29 | 31.29 -24959.58 | 29.85 -24909.21 | 31.05 -24857.16 | 33.95 -24835.66 | 30.87 |
| -25108.69 | 28.21 -25057.69 | 30.05 -25008.50 | 30.09 -24958.98 | 30.44 -24907.94 | 32.33 -24857.97 | 33.14 -24840.65 | 25.88 |
| -25109.74 | 27.16 -25059.67 | 28.08 -25007.78 | 30.80 -24959.26 | 30.17 -24908.53 | 31.74 -24851.79 | 39.32 -24830.41 | 36.12 |
| -25107.86 | 29.04 -25057.57 | 30.18 -25009.40 | 29.19 -24959.65 | 29.77 -24908.75 | 31.52 -24855.17 | 35.94 -24835.36 | 31.17 |
| -25108.67 | 28.24 -25059.26 | 28.48 -25008.02 | 30.57 -24959.98 | 29.45 -24908.72 | 31.54 -24829.62 | 61.49 -24837.25 | 29.28 |
| -25108.17 | 28.74 -25058.83 | 28.92 -25003.07 | 35.52 -24956.76 | 32.67 -24910.21 | 30.06 -24861.96 | 29.15 -24835.77 | 30.76 |
| -25108.20 | 28.70 -25060.32 | 27.42 -25007.91 | 30.68 -24958.91 | 30.52 -24909.22 | 31.04 -24854.67 | 36.44 -24836.77 | 29.76 |
| -25108.45 | 28.45 -25058.10 | 29.65 -25009.19 | 29.39 -24959.49 | 29.94 -24909.45 | 30.82 -24859.55 | 31.56 -24835.54 | 30.99 |
| -25107.93 | 28.98 -25058.44 | 29.31 -25006.79 | 31.80 -24956.81 | 32.61 -24908.34 | 31.93 -24857.71 | 33.40 -24837.82 | 28.71 |
| -25107.17 | 29.74 -25058.20 | 29.54 -25009.30 | 29.28 -24954.88 | 34.55 -24909.00 | 31.27 -24858.40 | 32.71 -24832.13 | 34.40 |
| -25109.58 | 27.32 -25054.44 | 33.30 -25008.05 | 30.54 -24960.30 | 29.13 -24910.54 | 29.73 -24853.26 | 37.85 -24835.17 | 31.36 |
| -25109.84 | 27.06 -25059.60 | 28.14 -25009.00 | 29.58 -24957.78 | 31.64 -24906.41 | 33.86 -24860.19 | 30.92 -24833.42 | 33.11 |
| -25108.87 | 28.04 -25056.06 | 31.68 -25007.15 | 31.44 -24960.54 | 28.88 -24909.32 | 30.95 -24857.84 | 33.27 -24833.61 | 32.92 |
| -25107.95 | 28.95 -25058.40 | 29.34 -25006.97 | 31.61 -24959.50 | 29.93 -24907.81 | 32.46 -24862.31 | 28.80 -24833.95 | 32.58 |
| -25108.55 | 28.36 -25056.44 | 31.30 -25009.59 | 29.00 -24958.88 | 30.55 -24906.73 | 33.54 -24857.52 | 33.59 -24834.03 | 32.50 |
| -25109.47 | 27.44 -25057.21 | 30.53 -25009.06 | 29.53 -24951.63 | 37.80 -24906.19 | 34.08 -24862.06 | 29.05 -24831.82 | 34.71 |
| -25108.67 | 28.23 -25060.05 | 27.70 -25007.83 | 30.75 -24958.61 | 30.82 -24903.23 | 37.04 -24862.95 | 28.16 -24836.29 | 30.24 |
| -25107.76 | 29.14 -25059.90 | 27.84 -25008.62 | 29.96 -24962.09 | 27.34 -24905.69 | 34.58 -24862.38 | 28.73 -24835.80 | 30.73 |
| -25108.89 | 28.01 -25056.40 | 31.34 -25005.27 | 33.32 -24956.65 | 32.78 -24911.02 | 29.25 -24860.81 | 30.30 -24826.78 | 39.75 |

|           |                 |                 |                 |                 |                 |                 |          |
|-----------|-----------------|-----------------|-----------------|-----------------|-----------------|-----------------|----------|
| -25109.32 | 27.58 -25054.87 | 32.88 -25009.81 | 28.77 -24959.69 | 29.74 -24910.84 | 29.43 -24862.77 | 28.34 -24834.84 | 31.69    |
| -25109.62 | 27.28 -25058.73 | 29.01 -25008.35 | 30.23 -24959.62 | 29.81 -24911.84 | 28.42 -24857.04 | 34.07 -24823.25 | 43.28    |
| -25108.89 | 28.02 -25060.28 | 27.46 -25009.11 | 29.48 -24955.65 | 33.78 -24909.97 | 30.30 -24856.70 | 34.41 -24832.91 | 33.62    |
| -25107.85 | 29.05 -25059.47 | 28.27 -25009.40 | 29.19 -24957.55 | 31.88 -24904.87 | 35.40 -24859.32 | 31.79 -24838.01 | 28.52    |
| -25109.63 | 27.27 -25060.16 | 27.59 -25006.61 | 31.98 -24960.39 | 29.04 -24905.04 | 35.23 -24855.74 | 35.37 -24835.70 | 30.83    |
| -25107.91 | 28.99 -25060.28 | 27.46 -25010.41 | 28.18 -24959.88 | 29.55 -24907.78 | 32.49 -24855.09 | 36.01 -24837.70 | 28.83    |
| -25109.18 | 27.73 -25059.24 | 28.51 -25008.68 | 29.91 -24958.03 | 31.40 -24855.59 | 84.68 -24860.59 | 30.52 -24837.57 | 28.96    |
| -25108.28 | 28.63 -25058.87 | 28.87 -25006.57 | 32.01 -24959.23 | 30.20 -24898.96 | 41.31 -24856.68 | 34.43 -24830.50 | 36.03    |
| -25108.83 | 28.07 -25057.63 | 30.11 -25008.43 | 30.16 -24959.33 | 30.10 -24909.52 | 30.75 -24856.55 | 34.56 -24838.19 | 28.34    |
| -25109.55 | 27.36 -25059.41 | 28.34 -24958.09 | 80.50 -24957.49 | 31.94 -24911.50 | 28.77 -24861.89 | 29.22 -24839.50 | 27.03    |
| -25107.81 | 29.09 -25053.56 | 34.19 -25008.99 | 29.60 -24959.52 | 29.91 -24910.78 | 29.49 -24858.14 | 32.97 -24830.32 | 36.22    |
| -25106.61 | 30.29 -25056.42 | 31.33 -25007.92 | 30.67 -24961.58 | 27.84 -24906.37 | 33.90 -24859.39 | 31.72 -24835.64 | 30.89    |
| -25109.19 | 27.71 -25060.30 | 27.45 -25009.70 | 28.88 -24906.03 | 83.39 -24909.21 | 31.06 -24826.69 | 64.42 -24833.71 | 32.82    |
| -25110.48 | 26.42 -25060.89 | 26.86 -25008.29 | 30.29 -24957.70 | 31.73 -24909.95 | 30.32 -24851.98 | 39.13 -24836.73 | 29.80    |
| -25107.85 | 29.05 -25059.22 | 28.53 -25009.75 | 28.84 -24958.48 | 30.95 -24910.54 | 29.73 -24858.27 | 32.84 -24837.43 | 29.10    |
| -25110.78 | 26.12 -25056.87 | 30.87 -25010.13 | 28.46 -24957.23 | 32.20 -24907.36 | 32.91 -24860.30 | 30.81 -24830.17 | 36.36    |
| -25109.20 | 27.71 -25057.54 | 30.20 -25010.38 | 28.20 -24957.13 | 32.29 -24907.02 | 33.25 -24854.61 | 36.50 -24838.16 | 28.38    |
| -25108.62 | 28.28 -25059.59 | 28.15 -25009.96 | 28.62 -24960.05 | 29.38 -24906.48 | 33.79 -24857.10 | 34.01 -24827.34 | 39.19    |
| -25108.25 | 28.66 -25060.56 | 27.19 -25008.46 | 30.12 -24960.22 | 29.20 -24911.84 | 28.43 -24859.45 | 31.66 -24833.73 | 32.80    |
| -25109.79 | 27.11 -25057.49 | 30.26 -25009.64 | 28.95 -24958.32 | 31.11 -24907.54 | 32.73 -24851.66 | 39.45 -24833.20 | 33.33    |
| -25110.11 | 26.79 -25059.52 | 28.22 -25008.82 | 29.77 -24959.70 | 29.72 -24913.67 | 26.60 -24853.98 | 37.12 -24836.47 | 30.06    |
| -25109.97 | 26.93 -25060.37 | 27.38 -25008.55 | 30.04 -24958.82 | 30.60 -24911.69 | 28.58 -24860.16 | 30.95 -24830.89 | 35.64    |
| -25109.61 | 27.29 -25059.18 | 28.56 -25008.01 | 30.58 -24958.21 | 31.22 -24909.71 | 30.55 -24860.63 | 30.48 -24834.21 | 32.32    |
| -25107.84 | 29.06 -25059.29 | 28.46 -25009.14 | 29.44 -24958.62 | 30.80 -24911.34 | 28.93 -24858.00 | 33.11 -24833.38 | 33.15    |
| -25109.42 | 27.48 -25058.38 | 29.36 -25008.64 | 29.95 -24959.94 | 29.49 -24909.25 | 31.02 -24863.59 | 27.51 -24832.51 | 34.02    |
| -25109.70 | 27.20 -25059.67 | 28.08 -25007.22 | 31.37 -24958.42 | 31.01 -24908.55 | 31.72 -24851.81 | 39.30 -24836.48 | 30.05    |
| -25108.41 | 28.50 -25059.85 | 27.89 -25007.50 | 31.08 -24958.45 | 30.97 -24853.12 | 87.15 -24858.97 | 32.14 -24834.93 | 31.60    |
| -25109.00 | 27.90 -25058.74 | 29.01 -25007.79 | 30.80 -24956.34 | 33.09 -24908.15 | 32.11 -24855.11 | 36.00 -24834.94 | 31.59    |
| -25108.21 | 28.69 -25058.94 | 28.80 -25011.29 | 27.29 -24958.78 | 30.65 -24913.82 | 26.45 -24857.29 | 33.82 -24838.73 | 27.80    |
| -25108.57 | 28.33 -25059.71 | 28.04 -25008.00 | 30.59 -24959.88 | 29.55 -24902.95 | 37.32 -24852.98 | 38.13 -24825.35 | 41.18    |
| -25110.18 | 26.72 -25060.51 | 27.24 -25008.09 | 30.50 -24905.38 | 84.05 -24908.53 | 31.74 -24857.15 | 33.96 -24831.54 | 34.99    |
| -25109.18 | 27.72 -25056.99 | 30.75 -25009.51 | 29.07 -24953.80 | 35.63 -24904.97 | 35.30 -24832.99 | 58.12 -24834.60 | 31.93    |
| -25109.48 | 27.43 -25059.09 | 28.66 -25010.63 | 27.96 -24956.13 | 33.30 -24907.13 | 33.14 -24860.94 | 30.17 -24832.39 | 34.14    |
| -25108.93 | 27.97 -25058.70 | 29.05 -25007.50 | 31.09 -24961.88 | 27.55 -24908.44 | 31.83 -24858.21 | 32.90 -24830.40 | 36.13    |
| -25109.45 | 27.45 -25059.99 | 27.76 -25007.18 | 31.40 -24959.37 | 30.06 -24910.22 | 30.05 -24859.37 | 31.74 -24833.64 | 32.89    |
| -25108.56 | 28.34 -25059.42 | 28.33 -25005.50 | 33.08 -24956.53 | 32.90 -24904.69 | 35.58 -24859.35 | 31.76 -24834.2  | 32.36    |
| -25107.75 | 29.16 -25059.78 | 27.97 -25009.72 | 28.86 -24956.25 | 33.17 -24903.78 | 36.49 -24860.48 | 30.63 -24829.9  | 36.67266 |
| -25109.22 | 27.68 -25059.24 | 28.50 -25008.69 | 29.90 -24953.46 | 35.96 -24908.52 | 31.75 -24859.61 | 31.50 -24832    | 34.49421 |
| -25110.61 | 26.29 -25058.94 | 28.80 -25007.70 | 30.89 -24952.64 | 36.79 -24907.96 | 32.31 -24857.55 | 33.56 -24837.9  | 28.62337 |
| -25108.09 | 28.81 -25059.91 | 27.84 -25008.17 | 30.42 -24960.42 | 29.01 -24908.00 | 32.27 -24854.71 | 36.40 -24836.4  | 30.17265 |
| -25109.01 | 27.90 -25058.61 | 29.13 -25010.99 | 27.60 -24959.17 | 30.26 -24899.15 | 41.12 -24858.60 | 32.51 -24837.2  | 29.29349 |

|           |          |           |          |           |          |           |          |          |          |           |          |          |          |
|-----------|----------|-----------|----------|-----------|----------|-----------|----------|----------|----------|-----------|----------|----------|----------|
| -25108.97 | 27.93    | -25058.90 | 28.85    | -25009.42 | 29.17    | -24959.91 | 29.51    | -24903.8 | 36.49699 | -24857.20 | 33.91    | -24834.9 | 31.60481 |
| -25108.60 | 28.31    | -25056.94 | 30.81    | -25007.99 | 30.60    | -24958.54 | 30.89    | -24912.8 | 27.46406 | -24857.11 | 34.00    | -24834.1 | 32.45993 |
| -25108.70 | 28.21    | -25059.25 | 28.50    | -25009.33 | 29.25    | -24952.6  | 36.78234 | -24909.4 | 30.89374 | -24857.90 | 33.21    | -24831.1 | 35.43485 |
| -25107.70 | 29.21    | -25058.95 | 28.79    | -25009.26 | 29.33    | -24955.9  | 33.53221 | -24910   | 30.29715 | -24859.91 | 31.20    | -24838.8 | 27.7311  |
| -25109.05 | 27.85    | -25059.91 | 27.83    | -25006.91 | 31.67    | -24956.8  | 32.57935 | -24906   | 34.2864  | -24860.48 | 30.63    | -24838.1 | 28.42323 |
| -25109.83 | 27.07    | -25059.54 | 28.20    | -25009.41 | 29.18    | -24958.9  | 30.49606 | -24907   | 33.30485 | -24856.93 | 34.18    | -24830.4 | 36.1318  |
| -25108.93 | 27.97    | -25058.89 | 28.86    | -25010.41 | 28.18    | -24957.7  | 31.71643 | -24907.9 | 32.39956 | -24856.00 | 35.11    | -24836.8 | 29.76614 |
| -25109.84 | 27.07    | -25059.28 | 28.47    | -25006.68 | 31.91    | -24955.9  | 33.54909 |          |          | -24855.68 | 35.43    | -24829.7 | 36.79479 |
| -25110.53 | 26.37    | -25058.47 | 29.27    | -25009.6  | 28.96139 | -24958.1  | 31.33781 |          |          | -24856.89 | 34.22    | -24831.4 | 35.09464 |
| -25108.84 | 28.06    | -25054.11 | 33.64    | -25009.6  | 28.94723 | -24954.8  | 34.59254 |          |          | -24857.50 | 33.61    | -24830.7 | 35.83184 |
| -25108.83 | 28.07    | -25056.4  | 31.34645 | -25006    | 32.60937 | -24960.9  | 28.49092 |          |          | -24858.5  | 32.60413 | -24831.1 | 35.38448 |
| -25108.92 | 27.98    | -25059.5  | 28.25667 |           |          | -24959.4  | 29.98548 |          |          | -24856.5  | 34.63477 |          |          |
| -25109.8  | 27.0768  |           |          |           |          | -24957.1  | 32.27751 |          |          | -24862.1  | 28.96729 |          |          |
| -25108.9  | 28.02392 |           |          |           |          |           |          |          |          | -24863.6  | 27.55774 |          |          |
| -25108.9  | 27.95894 |           |          |           |          |           |          |          |          |           |          |          |          |

Average energies      -25108.87      28.03 -25058.67      29.07 -25007.48      31.11 -24957.03      32.40 -24906.90      33.37 -24856.92      34.19 -24833.63      32.90

ground      solid  
state      solution  
energy      energy

# Th

concentration in solid solution (%)  
number of atoms

|           | 3     | 6         | 9     | 12        | 15    | 18        | 21    |           |       |           |       |           |       |
|-----------|-------|-----------|-------|-----------|-------|-----------|-------|-----------|-------|-----------|-------|-----------|-------|
|           | 2     | 4         | 6     | 8         | 10    | 12        | 13    |           |       |           |       |           |       |
| -25114.65 | 27.88 | -25069.45 | 29.56 | -25022.41 | 33.07 | -24975.23 | 36.72 | -24935.65 | 32.77 | -24878.07 | 46.82 | -24867.46 | 35.67 |
| -25114.99 | 27.55 | -25070.00 | 29.01 | -25025.97 | 29.51 | -24978.50 | 33.45 | -24933.81 | 34.61 | -24892.16 | 32.73 | -24870.46 | 32.67 |
| -25114.44 | 28.09 | -25067.09 | 31.92 | -25024.07 | 31.41 | -24976.52 | 35.43 | -24927.87 | 40.55 | -24884.24 | 40.65 | -24868.94 | 34.19 |
| -25115.58 | 26.95 | -25069.48 | 29.53 | -25022.90 | 32.57 | -24978.10 | 33.85 | -24936.27 | 32.15 | -24896.58 | 28.31 | -24859.20 | 43.93 |
| -25114.85 | 27.68 | -25071.05 | 27.95 | -25023.79 | 31.69 | -24979.78 | 32.17 | -24934.15 | 34.27 | -24889.96 | 34.93 | -24873.47 | 29.66 |
| -25114.87 | 27.67 | -25072.03 | 26.98 | -25020.94 | 34.54 | -24979.78 | 32.16 | -24934.90 | 33.52 | -24894.25 | 30.64 | -24871.14 | 31.99 |
| -25113.16 | 29.37 | -25070.62 | 28.39 | -25023.20 | 32.28 | -24979.40 | 32.54 | -24932.76 | 35.66 | -24889.42 | 35.48 | -24876.91 | 26.22 |
| -25114.85 | 27.69 | -25067.80 | 31.21 | -25022.25 | 33.23 | -24978.13 | 33.82 | -24931.44 | 36.98 | -24891.68 | 33.21 | -24868.41 | 34.72 |
| -25114.64 | 27.90 | -25069.01 | 30.00 | -25027.08 | 28.39 | -24983.08 | 28.87 | -24936.12 | 32.30 | -24889.74 | 35.16 | -24869.92 | 33.21 |
| -25115.19 | 27.34 | -25071.39 | 27.61 | -25022.22 | 33.25 | -24982.96 | 28.99 | -24928.57 | 39.85 | -24887.13 | 37.76 | -24872.57 | 30.56 |
| -25114.92 | 27.61 | -25069.02 | 29.98 | -25022.07 | 33.41 | -24981.44 | 30.51 | -24934.45 | 33.97 | -24888.20 | 36.69 | -24870.45 | 32.67 |
| -25114.17 | 28.37 | -25068.55 | 30.46 | -25023.66 | 31.81 | -24981.22 | 30.73 | -24934.52 | 33.90 | -24895.73 | 29.17 | -24864.71 | 38.42 |
| -25113.57 | 28.97 | -25068.20 | 30.81 | -25003.52 | 51.96 | -24961.93 | 50.02 | -24934.84 | 33.58 | -24883.57 | 41.32 | -24868.31 | 34.82 |
| -25115.95 | 26.58 | -25067.42 | 31.58 | -25023.86 | 31.61 | -24982.64 | 29.31 | -24938.83 | 29.59 | -24893.42 | 31.47 | -24865.15 | 37.98 |
| -25113.06 | 29.47 | -25069.66 | 29.35 | -25022.30 | 33.17 | -24978.21 | 33.74 | -24935.20 | 33.22 | -24888.19 | 36.70 | -24865.62 | 37.51 |
| -25115.35 | 27.19 | -25069.60 | 29.40 | -25020.96 | 34.52 | -24980.35 | 31.60 | -24932.79 | 35.63 | -24891.32 | 33.57 | -24871.86 | 31.27 |
| -25114.53 | 28.01 | -25069.86 | 29.14 | -25024.17 | 31.31 | -24979.39 | 32.56 | -24934.09 | 34.33 | -24891.20 | 33.69 | -24868.99 | 34.14 |

|           |                 |                 |                 |                 |                 |                 |       |
|-----------|-----------------|-----------------|-----------------|-----------------|-----------------|-----------------|-------|
| -25114.22 | 28.31 -25070.12 | 28.88 -25020.80 | 34.68 -24980.70 | 31.25 -24935.21 | 33.21 -24891.53 | 33.36 -24870.78 | 32.35 |
| -25115.06 | 27.48 -25066.74 | 32.26 -25025.60 | 29.87 -24980.24 | 31.71 -24934.50 | 33.92 -24888.96 | 35.93 -24861.91 | 41.21 |
| -25114.99 | 27.55 -25069.53 | 29.47 -25026.07 | 29.41 -24974.32 | 37.63 -24932.60 | 35.82 -24876.21 | 48.69 -24873.11 | 30.02 |
| -25113.66 | 28.88 -25070.06 | 28.95 -25020.06 | 35.42 -24978.23 | 33.72 -24938.90 | 29.52 -24889.03 | 35.86 -24855.78 | 47.34 |
| -25115.16 | 27.37 -25069.19 | 29.82 -25026.16 | 29.32 -24977.75 | 34.20 -24935.32 | 33.10 -24894.08 | 30.81 -24865.75 | 37.38 |
| -25113.43 | 29.10 -25070.24 | 28.77 -25020.68 | 34.80 -24980.89 | 31.06 -24931.02 | 37.40 -24885.38 | 39.52 -24870.49 | 32.64 |
| -25115.85 | 26.68 -25070.62 | 28.39 -25024.93 | 30.55 -24979.10 | 32.85 -24932.60 | 35.82 -24894.90 | 29.99 -24864.22 | 38.91 |
| -25114.05 | 28.48 -25071.07 | 27.94 -25022.14 | 33.34 -24978.77 | 33.18 -24931.40 | 37.02 -24886.42 | 38.47 -24871.07 | 32.06 |
| -25114.25 | 28.29 -25067.78 | 31.22 -25025.93 | 29.54 -24980.04 | 31.91 -24936.74 | 31.68 -24884.50 | 40.39 -24871.51 | 31.62 |
| -25113.99 | 28.55 -25070.92 | 28.09 -25022.51 | 32.96 -24981.09 | 30.86 -24937.92 | 30.50 -24892.10 | 32.80 -24861.14 | 41.99 |
| -25115.40 | 27.13 -25069.12 | 29.88 -25025.69 | 29.78 -24980.78 | 31.17 -24937.24 | 31.18 -24894.27 | 30.63 -24867.56 | 35.56 |
| -25112.87 | 29.67 -25070.12 | 28.89 -25025.74 | 29.73 -24979.41 | 32.54 -24934.53 | 33.89 -24895.05 | 29.85 -24874.57 | 28.56 |
| -25113.54 | 28.99 -25069.75 | 29.26 -25021.38 | 34.10 -24975.29 | 36.66 -24936.27 | 32.15 -24888.59 | 36.30 -24870.71 | 32.42 |
| -25114.85 | 27.68 -25069.86 | 29.14 -25025.12 | 30.35 -24978.92 | 33.03 -24937.12 | 31.30 -24890.82 | 34.08 -24843.82 | 59.31 |
| -25113.19 | 29.34 -25068.42 | 30.58 -25017.84 | 37.64 -24981.96 | 29.99 -24937.35 | 31.07 -24892.48 | 32.41 -24865.37 | 37.76 |
| -25115.16 | 27.37 -25069.12 | 29.89 -25024.10 | 31.37 -24978.08 | 33.87 -24930.44 | 37.99 -24887.71 | 37.18 -24867.35 | 35.78 |
| -25115.27 | 27.26 -25063.61 | 35.40 -25025.59 | 29.89 -24977.94 | 34.01 -24937.17 | 31.25 -24890.53 | 34.36 -24870.21 | 32.92 |
| -25113.94 | 28.60 -25069.43 | 29.58 -25023.86 | 31.61 -24979.93 | 32.02 -24934.65 | 33.77 -24891.49 | 33.40 -24860.51 | 42.62 |
| -25114.82 | 27.72 -25069.57 | 29.43 -25023.75 | 31.73 -24976.69 | 35.26 -24934.17 | 34.25 -24886.39 | 38.50 -24871.16 | 31.97 |
| -25114.48 | 28.06 -25066.84 | 32.16 -25026.69 | 28.78 -24982.08 | 29.87 -24936.01 | 32.41 -24887.31 | 37.59 -24859.40 | 43.72 |
| -25114.06 | 28.47 -25072.15 | 26.86 -25020.49 | 34.99 -24971.54 | 40.41 -24932.58 | 35.84 -24888.74 | 36.15 -24863.96 | 39.17 |
| -25115.61 | 26.92 -25068.62 | 30.39 -25020.53 | 34.94 -24979.85 | 32.10 -24934.73 | 33.69 -24890.82 | 34.07 -24868.29 | 34.84 |
| -25115.70 | 26.83 -25071.06 | 27.95 -25021.49 | 33.98 -24976.57 | 35.38 -24935.60 | 32.82 -24891.69 | 33.20 -24872.08 | 31.05 |
| -25113.79 | 28.74 -25068.99 | 30.02 -25026.48 | 29.00 -24970.10 | 41.85 -24933.41 | 35.01 -24881.92 | 42.97 -24870.39 | 32.74 |
| -25113.82 | 28.71 -25071.64 | 27.36 -25025.65 | 29.83 -24970.89 | 41.06 -24930.75 | 37.67 -24888.51 | 36.38 -24864.62 | 38.51 |
| -25113.72 | 28.81 -25070.72 | 28.29 -25024.02 | 31.46 -24980.56 | 31.39 -24925.46 | 42.96 -24887.51 | 37.38 -24872.46 | 30.67 |
| -25113.59 | 28.95 -25071.56 | 27.45 -25023.26 | 32.22 -24982.59 | 29.36 -24932.56 | 35.86 -24893.35 | 31.54 -24857.86 | 45.26 |
| -25114.49 | 28.05 -25068.83 | 30.18 -25025.72 | 29.76 -24978.55 | 33.40 -24930.38 | 38.04 -24887.22 | 37.68 -24861.05 | 42.07 |
| -25114.20 | 28.33 -25071.76 | 27.25 -25021.09 | 34.39 -24981.61 | 30.34 -24931.69 | 36.73 -24883.01 | 41.89 -24872.83 | 30.30 |
| -25115.73 | 26.80 -25071.23 | 27.77 -25024.78 | 30.70 -24976.26 | 35.69 -24931.99 | 36.44 -24888.66 | 36.23 -24875.24 | 27.89 |
| -25114.46 | 28.07 -25070.98 | 28.02 -25024.92 | 30.56 -24977.18 | 34.77 -24935.25 | 33.17 -24890.37 | 34.52 -24862.08 | 41.05 |
| -25114.89 | 27.65 -25068.68 | 30.32 -25022.88 | 32.59 -24977.04 | 34.91 -24928.37 | 40.05 -24893.60 | 31.29 -24864.36 | 38.77 |
| -25114.70 | 27.84 -25068.98 | 30.02 -25026.75 | 28.73 -24981.13 | 30.82 -24937.44 | 30.99 -24885.48 | 39.41 -24869.41 | 33.72 |
| -25114.81 | 27.73 -25068.39 | 30.61 -25022.73 | 32.75 -24981.39 | 30.56 -24923.95 | 44.47 -24892.04 | 32.85 -24864.78 | 38.35 |
| -25116.04 | 26.49 -25069.92 | 29.08 -25026.09 | 29.38 -24980.09 | 31.86 -24932.99 | 35.43 -24881.47 | 43.42 -24870.55 | 32.57 |
| -25114.22 | 28.31 -25070.42 | 28.59 -25022.40 | 33.08 -24978.46 | 33.48 -24929.81 | 38.61 -24890.86 | 34.04 -24865.45 | 37.68 |
| -25113.89 | 28.65 -25069.01 | 30.00 -25019.09 | 36.39 -24977.63 | 34.32 -24935.61 | 32.81 -24889.13 | 35.76 -24864.58 | 38.55 |
| -25115.41 | 27.12 -25068.34 | 30.67 -25024.59 | 30.89 -24980.04 | 31.91 -24930.48 | 37.94 -24890.45 | 34.44 -24868.70 | 34.42 |
| -25114.04 | 28.50 -25068.66 | 30.35 -25023.27 | 32.20 -24984.42 | 27.52 -24924.16 | 44.26 -24886.38 | 38.51 -24872.74 | 30.39 |
| -25113.06 | 29.47 -25068.35 | 30.65 -25024.38 | 31.10 -24975.46 | 36.49 -24933.52 | 34.90 -24892.68 | 32.21 -24863.95 | 39.18 |
| -25112.26 | 30.27 -25066.78 | 32.22 -25025.15 | 30.33 -24983.27 | 28.68 -24934.48 | 33.94 -24892.18 | 32.72 -24872.03 | 31.10 |



|           |                 |                 |                 |                 |                 |                 |       |
|-----------|-----------------|-----------------|-----------------|-----------------|-----------------|-----------------|-------|
| -25114.03 | 28.51 -25070.83 | 28.17 -25026.79 | 28.68 -24981.10 | 30.85 -24928.24 | 40.18 -24892.89 | 32.00 -24863.34 | 39.79 |
| -25113.16 | 29.37 -25069.11 | 29.90 -25024.05 | 31.43 -24979.31 | 32.64 -24936.23 | 32.19 -24889.11 | 35.79 -24861.99 | 41.13 |
| -25114.91 | 27.62 -25069.68 | 29.33 -25018.77 | 36.71 -24937.42 | 74.53 -24887.65 | 80.77 -24886.76 | 38.13 -24862.65 | 40.48 |
| -25113.70 | 28.83 -25068.93 | 30.07 -25023.68 | 31.80 -24976.49 | 35.46 -24934.00 | 34.42 -24890.07 | 34.82 -24862.57 | 40.56 |
| -25113.64 | 28.90 -25070.17 | 28.84 -25025.87 | 29.61 -24982.96 | 28.99 -24930.28 | 38.15 -24871.85 | 53.04 -24863.98 | 39.15 |
| -25114.99 | 27.55 -25070.29 | 28.72 -25025.95 | 29.53 -24981.75 | 30.20 -24937.32 | 31.10 -24887.83 | 37.06 -24869.01 | 34.12 |
| -25112.99 | 29.54 -25068.18 | 30.82 -25025.49 | 29.99 -24978.31 | 33.64 -24936.39 | 32.03 -24891.33 | 33.56 -24864.12 | 39.01 |
| -25114.29 | 28.24 -25071.47 | 27.53 -25021.96 | 33.52 -24982.10 | 29.85 -24937.23 | 31.19 -24891.86 | 33.03 -24870.68 | 32.45 |
| -25113.72 | 28.81 -25069.78 | 29.22 -25023.67 | 31.80 -24978.80 | 33.14 -24933.18 | 35.24 -24883.97 | 40.92 -24868.55 | 34.58 |
| -25114.35 | 28.18 -25069.61 | 29.40 -25025.46 | 30.01 -24980.42 | 31.53 -24933.89 | 34.53 -24889.62 | 35.27 -24859.60 | 43.53 |
| -25112.43 | 30.10 -25070.93 | 28.08 -25021.00 | 34.48 -24971.91 | 40.04 -24935.74 | 32.68 -24895.32 | 29.57 -24870.68 | 32.45 |
| -25114.98 | 27.55 -25070.54 | 28.47 -25027.06 | 28.41 -24976.09 | 35.86 -24929.00 | 39.42 -24889.69 | 35.20 -24871.23 | 31.90 |
| -25114.05 | 28.49 -25070.27 | 28.74 -25024.29 | 31.19 -24981.55 | 30.40 -24928.82 | 39.60 -24888.59 | 36.31 -24869.36 | 33.77 |
| -25114.85 | 27.68 -25066.56 | 32.45 -25021.95 | 33.53 -24982.28 | 29.67 -24932.65 | 35.77 -24886.98 | 37.91 -24868.05 | 35.08 |
| -25114.44 | 28.09 -25071.24 | 27.77 -25024.91 | 30.57 -24979.24 | 32.71 -24935.36 | 33.06 -24892.64 | 32.25 -24868.81 | 34.32 |
| -25115.15 | 27.38 -25069.44 | 29.57 -25022.46 | 33.02 -24977.57 | 34.38 -24931.60 | 36.82 -24889.60 | 35.29 -24867.82 | 35.31 |
| -25114.66 | 27.88 -25067.61 | 31.39 -25021.01 | 34.47 -24981.27 | 30.67 -24934.75 | 33.67 -24888.26 | 36.63 -24868.64 | 34.48 |
| -25115.21 | 27.33 -25071.54 | 27.47 -25024.41 | 31.07 -24976.59 | 35.36 -24925.30 | 43.12 -24888.30 | 36.60 -24864.76 | 38.36 |
| -25113.43 | 29.10 -25069.42 | 29.59 -25023.99 | 31.48 -24967.32 | 44.63 -24936.97 | 31.45 -24888.43 | 36.47 -24867.24 | 35.89 |
| -25115.94 | 26.59 -25068.64 | 30.37 -25025.27 | 30.20 -24982.10 | 29.85 -24930.76 | 37.66 -24889.54 | 35.35 -24873.28 | 29.85 |
| -25114.18 | 28.35 -25069.67 | 29.34 -25024.64 | 30.84 -24983.05 | 28.90 -24936.06 | 32.36 -24891.71 | 33.19 -24861.84 | 41.28 |
| -25115.17 | 27.37 -25069.38 | 29.62 -25023.07 | 32.41 -24978.95 | 33.00 -24936.68 | 31.74 -24865.47 | 59.43 -24860.88 | 42.24 |
| -25115.33 | 27.21 -25066.53 | 32.48 -25025.61 | 29.86 -24977.15 | 34.80 -24885.57 | 82.85 -24884.92 | 39.97 -24864.76 | 38.37 |
| -25115.35 | 27.18 -25069.71 | 29.29 -25024.86 | 30.61 -24972.93 | 39.02 -24934.96 | 33.46 -24892.57 | 32.32 -24865.55 | 37.58 |
| -25115.29 | 27.24 -25070.41 | 28.60 -25025.80 | 29.67 -24979.36 | 32.59 -24931.78 | 36.64 -24895.21 | 29.69 -24872.68 | 30.45 |
| -25113.68 | 28.85 -25067.63 | 31.37 -25024.62 | 30.86 -24977.49 | 34.46 -24937.01 | 31.41 -24890.67 | 34.22 -24866.70 | 36.43 |
| -25115.65 | 26.88 -25070.75 | 28.26 -25024.63 | 30.85 -24982.38 | 29.57 -24934.80 | 33.63 -24891.71 | 33.19 -24866.95 | 36.18 |
| -25113.79 | 28.75 -25069.00 | 30.00 -25026.50 | 28.98 -24980.36 | 31.59 -24933.74 | 34.68 -24891.76 | 33.13 -24870.71 | 32.42 |
| -25115.29 | 27.24 -25070.44 | 28.56 -25024.71 | 30.77 -24982.23 | 29.72 -24936.30 | 32.12 -24890.68 | 34.21 -24872.97 | 30.16 |
| -25113.51 | 29.02 -25065.41 | 33.60 -25024.11 | 31.37 -24975.62 | 36.33 -24933.66 | 34.76 -24888.85 | 36.04 -24869.51 | 33.62 |
| -25113.72 | 28.81 -25064.77 | 34.23 -25020.72 | 34.75 -24979.49 | 32.46 -24935.56 | 32.86 -24888.27 | 36.62 -24862.68 | 40.45 |
| -25114.21 | 28.33 -25069.97 | 29.04 -25024.25 | 31.23 -24979.59 | 32.36 -24934.26 | 34.16 -24886.74 | 38.15 -24866.18 | 36.95 |
| -25114.86 | 27.67 -25070.72 | 28.28 -25025.42 | 30.06 -24982.01 | 29.94 -24933.71 | 34.71 -24888.63 | 36.26 -24871.95 | 31.17 |
| -25114.36 | 28.17 -25071.16 | 27.84 -25023.64 | 31.83 -24982.05 | 29.90 -24932.72 | 35.70 -24897.10 | 27.79 -24869.89 | 33.24 |
| -25114.04 | 28.50 -25069.00 | 30.00 -25023.60 | 31.88 -24979.53 | 32.42 -24937.98 | 30.44 -24894.21 | 30.69 -24863.67 | 39.46 |
| -25115.51 | 27.03 -25066.27 | 32.74 -25024.77 | 30.71 -24983.21 | 28.74 -24934.36 | 34.06 -24885.56 | 39.33 -24866.93 | 36.20 |
| -25114.95 | 27.58 -25069.34 | 29.66 -25023.54 | 31.94 -24976.44 | 35.51 -24938.78 | 29.64 -24890.80 | 34.09 -24866.20 | 36.93 |
| -25114.97 | 27.56 -25068.88 | 30.13 -25025.79 | 29.68 -24976.67 | 35.27 -24933.60 | 34.82 -24886.45 | 38.44 -24871.19 | 31.94 |
| -25115.30 | 27.23 -25070.60 | 28.40 -25021.62 | 33.85 -24977.92 | 34.03 -24934.73 | 33.69 -24891.39 | 33.50 -24862.61 | 40.52 |
| -25110.67 | 31.87 -25067.70 | 31.31 -25025.29 | 30.19 -24980.68 | 31.27 -24934.02 | 34.40 -24891.08 | 33.81 -24866.43 | 36.70 |
| -25113.68 | 28.86 -25068.76 | 30.25 -25026.10 | 29.37 -24981.08 | 30.86 -24934.96 | 33.46 -24889.87 | 35.02 -24866.60 | 36.52 |

|           |       |           |       |           |       |           |       |           |       |           |       |           |       |
|-----------|-------|-----------|-------|-----------|-------|-----------|-------|-----------|-------|-----------|-------|-----------|-------|
| -25113.70 | 28.84 | -25071.12 | 27.89 | -25023.73 | 31.75 | -24974.91 | 37.04 | -24938.11 | 30.31 | -24889.41 | 35.48 | -24869.65 | 33.48 |
| -25114.19 | 28.34 | -25066.86 | 32.14 | -25027.38 | 28.10 | -24978.65 | 33.30 | -24937.92 | 30.50 | -24888.17 | 36.72 | -24867.22 | 35.91 |
| -25114.86 | 27.67 | -25067.89 | 31.12 | -25023.75 | 31.73 | -24977.70 | 34.25 | -24928.73 | 39.69 | -24885.69 | 39.20 | -24868.34 | 34.79 |
| -25114.74 | 27.79 | -25068.40 | 30.61 | -25026.12 | 29.36 | -24980.36 | 31.59 | -24937.41 | 31.01 | -24889.98 | 34.91 | -24867.07 | 36.06 |
| -25115.55 | 26.99 | -25069.61 | 29.39 | -25024.96 | 30.52 | -24979.66 | 32.29 | -24929.15 | 39.27 | -24889.44 | 35.45 | -24866.96 | 36.16 |
| -25115.93 | 26.60 | -25071.77 | 27.23 | -25022.17 | 33.30 | -24981.03 | 30.92 | -24936.36 | 32.06 | -24894.86 | 30.03 | -24870.49 | 32.64 |
| -25113.48 | 29.06 | -25069.85 | 29.15 | -25024.95 | 30.53 | -24976.98 | 34.97 | -24928.86 | 39.56 | -24888.28 | 36.61 | -24871.03 | 32.10 |
| -25113.81 | 28.72 | -25070.60 | 28.40 | -25024.38 | 31.10 | -24980.25 | 31.70 | -24935.31 | 33.11 | -24887.59 | 37.30 | -24870.15 | 32.98 |
| -25113.79 | 28.74 | -25067.44 | 31.57 | -25023.40 | 32.07 | -24976.86 | 35.09 | -24930.85 | 37.57 | -24894.39 | 30.50 | -24868.56 | 34.57 |
| -25114.74 | 27.80 | -25069.86 | 29.14 | -25026.56 | 28.92 | -24982.13 | 29.82 | -24928.29 | 40.13 | -24888.19 | 36.71 | -24867.46 | 35.67 |
| -25114.19 | 28.35 | -25070.46 | 28.55 | -25022.67 | 32.80 | -24976.35 | 35.60 | -24929.09 | 39.34 | -24893.82 | 31.08 | -24868.35 | 34.78 |
| -25114.95 | 27.59 | -25068.80 | 30.20 | -25023.22 | 32.26 | -24978.56 | 33.38 | -24934.91 | 33.51 | -24885.26 | 39.64 | -24869.85 | 33.28 |
| -25114.69 | 27.84 | -25070.11 | 28.89 | -25025.76 | 29.72 | -24980.17 | 31.78 | -24929.88 | 38.54 | -24894.02 | 30.88 | -24866.08 | 37.05 |
| -25115.26 | 27.27 | -25065.70 | 33.31 | -25024.96 | 30.52 | -24981.83 | 30.12 | -24935.13 | 33.29 | -24889.93 | 34.97 | -24865.21 | 37.92 |
| -25114.76 | 27.77 | -25070.23 | 28.78 | -25027.13 | 28.34 | -24978.89 | 33.06 | -24935.10 | 33.32 | -24891.94 | 32.96 |           |       |
| -25114.71 | 27.83 | -25070.66 | 28.35 | -25026.03 | 29.44 | -24977.02 | 34.93 | -24934.56 | 33.86 | -24888.06 | 36.83 |           |       |
| -25109.63 | 32.90 | -25068.29 | 30.71 | -25025.18 | 30.30 | -24982.89 | 29.06 | -24936.92 | 31.50 | -24880.29 | 44.60 |           |       |
| -25113.46 | 29.07 |           |       | -25022.11 | 33.37 |           |       |           |       |           |       |           |       |
| -25116.02 | 26.51 |           |       | -25026.54 | 28.94 |           |       |           |       |           |       |           |       |
| -25113.14 | 29.39 |           |       |           |       |           |       |           |       |           |       |           |       |

Average energies

|           |       |           |       |           |       |           |       |           |       |           |       |           |       |
|-----------|-------|-----------|-------|-----------|-------|-----------|-------|-----------|-------|-----------|-------|-----------|-------|
| -25114.40 | 28.13 | -25069.36 | 29.65 | -25023.80 | 31.68 | -24978.54 | 33.41 | -24932.84 | 35.58 | -24889.17 | 35.72 | -24867.32 | 35.81 |
|-----------|-------|-----------|-------|-----------|-------|-----------|-------|-----------|-------|-----------|-------|-----------|-------|

## U

concentration in solid solution (%)

number of atoms

|           | ground<br>state<br>energy | solid<br>solution<br>energy |       |           |       |           |       |           |       |           |       |           |       |
|-----------|---------------------------|-----------------------------|-------|-----------|-------|-----------|-------|-----------|-------|-----------|-------|-----------|-------|
|           | 3                         | 6                           |       | 9         |       | 12        |       | 15        |       | 18        |       | 21        |       |
|           | 2                         | 4                           |       | 6         |       | 8         |       | 10        |       | 12        |       | 13        |       |
| -25149.28 | -1.73                     | -25110.10                   | -1.06 | -25071.45 | -0.91 | -25030.14 | 1.88  | -24992.02 | 1.50  | -24950.70 | 4.30  | -24931.26 | 4.49  |
| -25150.97 | -3.41                     | -25108.82                   | 0.23  | -25073.30 | -2.77 | -25029.41 | 2.62  | -24989.43 | 4.08  | -24950.10 | 4.91  | -24929.12 | 6.63  |
| -25151.67 | -4.12                     | -25111.87                   | -2.83 | -25070.30 | 0.24  | -25031.39 | 0.63  | -24990.38 | 3.13  | -24946.27 | 8.74  | -24931.27 | 4.48  |
| -25151.06 | -3.50                     | -25110.25                   | -1.21 | -25069.61 | 0.92  | -25032.48 | -0.46 | -24987.46 | 6.05  | -24954.46 | 0.55  | -24929.32 | 6.43  |
| -25149.00 | -1.45                     | -25110.02                   | -0.98 | -25068.32 | 2.21  | -25030.57 | 1.45  | -24980.60 | 12.91 | -24948.72 | 6.29  | -24933.92 | 1.83  |
| -25151.01 | -3.45                     | -25107.89                   | 1.15  | -25069.02 | 1.51  | -25021.45 | 10.58 | -24986.10 | 7.41  | -24952.09 | 2.92  | -24928.21 | 7.54  |
| -25150.38 | -2.83                     | -25108.70                   | 0.34  | -25071.26 | -0.73 | -25025.22 | 6.81  | -24990.83 | 2.68  | -24949.33 | 5.68  | -24930.49 | 5.26  |
| -25149.24 | -1.69                     | -25109.95                   | -0.91 | -25071.07 | -0.54 | -25032.53 | -0.51 | -24993.16 | 0.35  | -24953.69 | 1.31  | -24934.28 | 1.47  |
| -25148.74 | -1.19                     | -25111.69                   | -2.64 | -25070.05 | 0.49  | -25022.94 | 9.09  | -24989.51 | 4.01  | -24944.25 | 10.75 | -24925.39 | 10.36 |
| -25142.02 | 5.53                      | -25112.21                   | -3.17 | -25068.61 | 1.92  | -25029.95 | 2.07  | -24990.69 | 2.82  | -24952.51 | 2.49  | -24932.55 | 3.20  |
| -25151.73 | -4.18                     | -25110.44                   | -1.40 | -25068.80 | 1.73  | -25030.88 | 1.14  | -24987.38 | 6.13  | -24950.06 | 4.94  | -24932.83 | 2.92  |

|           |       |           |       |           |       |           |       |           |       |           |       |           |       |
|-----------|-------|-----------|-------|-----------|-------|-----------|-------|-----------|-------|-----------|-------|-----------|-------|
| -25149.92 | -2.37 | -25110.56 | -1.51 | -25071.01 | -0.48 | -25029.38 | 2.64  | -24989.90 | 3.62  | -24947.59 | 7.41  | -24931.75 | 4.00  |
| -25149.57 | -2.02 | -25110.46 | -1.42 | -25067.48 | 3.06  | -25027.99 | 4.04  | -24986.68 | 6.83  | -24952.39 | 2.61  | -24931.47 | 4.28  |
| -25148.67 | -1.12 | -25109.42 | -0.38 | -25066.85 | 3.69  | -25028.40 | 3.62  | -24990.29 | 3.23  | -24947.65 | 7.36  | -24932.32 | 3.43  |
| -25150.89 | -3.34 | -25111.78 | -2.74 | -25069.85 | 0.68  | -25030.39 | 1.63  | -24991.66 | 1.85  | -24943.34 | 11.66 | -24924.44 | 11.31 |
| -25148.78 | -1.23 | -25112.52 | -3.48 | -25070.07 | 0.46  | -25029.48 | 2.54  | -24990.04 | 3.47  | -24949.54 | 5.46  | -24926.23 | 9.52  |
| -25149.89 | -2.34 | -25109.90 | -0.86 | -25070.67 | -0.14 | -25026.27 | 5.75  | -24991.30 | 2.22  | -24939.43 | 15.57 | -24928.99 | 6.75  |
| -25150.33 | -2.78 | -25110.76 | -1.72 | -25068.91 | 1.63  | -25030.59 | 1.44  | -24989.76 | 3.76  | -24948.51 | 6.49  | -24927.52 | 8.23  |
| -25148.33 | -0.78 | -25109.46 | -0.41 | -25070.24 | 0.30  | -25029.82 | 2.21  | -24990.38 | 3.13  | -24950.41 | 4.60  | -24928.37 | 7.37  |
| -25150.35 | -2.80 | -25110.77 | -1.73 | -25067.34 | 3.20  | -25027.31 | 4.71  | -24990.86 | 2.66  | -24947.16 | 7.84  | -24930.59 | 5.16  |
| -25150.41 | -2.86 | -25110.12 | -1.08 | -25070.58 | -0.04 | -25031.92 | 0.11  | -24988.75 | 4.77  | -24949.97 | 5.03  | -24930.92 | 4.83  |
| -25150.02 | -2.47 | -25109.58 | -0.54 | -25067.00 | 3.53  | -25028.66 | 3.36  | -24992.23 | 1.28  | -24953.48 | 1.53  | -24931.49 | 4.26  |
| -25148.91 | -1.36 | -25110.08 | -1.04 | -25063.71 | 6.82  | -25028.86 | 3.16  | -24993.52 | 0.00  | -24950.95 | 4.06  | -24928.28 | 7.46  |
| -25150.27 | -2.72 | -25110.27 | -1.23 | -25067.96 | 2.58  | -25030.81 | 1.21  | -24990.78 | 2.74  | -24945.61 | 9.39  | -24930.13 | 5.62  |
| -25142.09 | 5.46  | -25111.39 | -2.35 | -25069.66 | 0.87  | -25028.92 | 3.11  | -24992.01 | 1.51  | -24948.60 | 6.40  | -24933.78 | 1.97  |
| -25150.35 | -2.80 | -25108.21 | 0.83  | -25070.27 | 0.26  | -25030.56 | 1.46  | -24992.16 | 1.36  | -24949.51 | 5.50  | -24932.87 | 2.88  |
| -25148.05 | -0.49 | -25110.75 | -1.71 | -25068.93 | 1.60  | -25029.44 | 2.58  | -24988.95 | 4.56  | -24947.34 | 7.66  | -24930.33 | 5.42  |
| -25149.13 | -1.58 | -25110.31 | -1.27 | -25069.51 | 1.02  | -25029.99 | 2.04  | -24991.22 | 2.29  | -24951.48 | 3.53  | -24928.44 | 7.31  |
| -25150.10 | -2.54 | -25110.46 | -1.42 | -25068.31 | 2.22  | -25030.88 | 1.14  | -24989.65 | 3.86  | -24945.55 | 9.45  | -24930.20 | 5.55  |
| -25150.95 | -3.39 | -25108.62 | 0.42  | -25070.70 | -0.16 | -25030.10 | 1.93  | -24988.94 | 4.57  | -24951.95 | 3.06  | -24926.68 | 9.07  |
| -25149.74 | -2.19 | -25110.02 | -0.98 | -25067.92 | 2.61  | -25030.80 | 1.23  | -24992.29 | 1.22  | -24946.00 | 9.00  | -24932.18 | 3.57  |
| -25150.34 | -2.79 | -25110.18 | -1.13 | -25069.16 | 1.37  | -25029.06 | 2.97  | -24991.68 | 1.83  | -24950.66 | 4.34  | -24928.82 | 6.93  |
| -25151.25 | -3.69 | -25108.00 | 1.04  | -25069.08 | 1.46  | -25030.01 | 2.02  | -24993.82 | -0.31 | -24948.40 | 6.60  | -24926.73 | 9.02  |
| -25150.03 | -2.48 | -25110.86 | -1.82 | -25071.82 | -1.28 | -25029.64 | 2.38  | -24991.13 | 2.38  | -24950.15 | 4.85  | -24925.62 | 10.13 |
| -25143.39 | 4.16  | -25111.45 | -2.41 | -25067.90 | 2.63  | -25033.23 | -1.21 | -24989.48 | 4.03  | -24948.92 | 6.08  | -24926.53 | 9.22  |
| -25150.98 | -3.43 | -25110.40 | -1.36 | -25069.38 | 1.16  | -25030.40 | 1.62  | -24988.42 | 5.09  | -24942.23 | 12.78 | -24932.41 | 3.34  |
| -25150.87 | -3.32 | -25111.29 | -2.25 | -25072.24 | -1.70 | -25031.62 | 0.40  | -24988.29 | 5.22  | -24952.41 | 2.59  | -24926.34 | 9.41  |
| -25150.00 | -2.45 | -25108.02 | 1.02  | -25069.97 | 0.56  | -25030.97 | 1.06  | -24992.40 | 1.12  | -24952.49 | 2.52  | -24932.21 | 3.54  |
| -25151.08 | -3.53 | -25109.72 | -0.68 | -25068.99 | 1.55  | -25031.01 | 1.01  | -24990.26 | 3.25  | -24950.05 | 4.96  | -24929.26 | 6.49  |
| -25150.53 | -2.98 | -25110.95 | -1.91 | -25069.32 | 1.22  | -25029.83 | 2.19  | -24984.09 | 9.42  | -24945.89 | 9.11  | -24926.83 | 8.92  |
| -25150.23 | -2.68 | -25110.68 | -1.64 | -25071.03 | -0.50 | -25029.89 | 2.14  | -24987.97 | 5.55  | -24952.28 | 2.72  | -24930.52 | 5.22  |
| -25149.39 | -1.84 | -25110.88 | -1.84 | -25070.84 | -0.31 | -25026.78 | 5.24  | -24987.91 | 5.61  | -24953.20 | 1.81  | -24930.98 | 4.77  |
| -25150.96 | -3.41 | -25112.44 | -3.40 | -25071.14 | -0.61 | -25028.51 | 3.51  | -24987.85 | 5.67  | -24949.83 | 5.18  | -24926.27 | 9.48  |
| -25149.88 | -2.33 | -25109.60 | -0.55 | -25070.52 | 0.02  | -25030.87 | 1.15  | -24995.48 | -1.96 | -24947.98 | 7.03  | -24928.97 | 6.78  |
| -25149.72 | -2.16 | -25108.90 | 0.15  | -25066.45 | 4.08  | -25031.85 | 0.17  | -24990.27 | 3.24  | -24951.17 | 3.83  | -24926.84 | 8.91  |
| -25150.34 | -2.78 | -25109.51 | -0.46 | -25071.99 | -1.46 | -25030.08 | 1.94  | -24991.08 | 2.44  | -24950.42 | 4.59  | -24929.87 | 5.88  |
| -25151.32 | -3.77 | -25110.11 | -1.06 | -25070.57 | -0.04 | -25027.87 | 4.15  | -24992.55 | 0.96  | -24944.77 | 10.23 | -24932.82 | 2.93  |
| -25149.65 | -2.09 | -25109.99 | -0.95 | -25069.14 | 1.39  | -25029.58 | 2.44  | -24990.69 | 2.82  | -24951.23 | 3.77  | -24930.33 | 5.41  |
| -25151.20 | -3.65 | -25109.36 | -0.32 | -25069.93 | 0.60  | -25029.04 | 2.99  | -24992.15 | 1.36  | -24951.50 | 3.50  | -24931.27 | 4.48  |
| -25150.04 | -2.48 | -25109.69 | -0.64 | -25069.85 | 0.68  | -25027.96 | 4.06  | -24988.78 | 4.74  | -24946.66 | 8.34  | -24932.73 | 3.02  |
| -25150.59 | -3.04 | -25108.83 | 0.21  | -25068.48 | 2.05  | -25028.68 | 3.35  | -24989.57 | 3.95  | -24952.00 | 3.01  | -24930.62 | 5.13  |
| -25149.58 | -2.03 | -25111.21 | -2.17 | -25070.75 | -0.22 | -25028.84 | 3.18  | -24991.95 | 1.56  | -24949.01 | 5.99  | -24932.20 | 3.55  |



|                  |           |                 |                 |                |                |                |                |      |
|------------------|-----------|-----------------|-----------------|----------------|----------------|----------------|----------------|------|
| Average energies | -25149.71 | -2.15 -25110.18 | -1.14 -25069.81 | 0.73 -25029.34 | 2.69 -24989.90 | 3.62 -24949.04 | 5.97 -24929.73 | 6.02 |
|------------------|-----------|-----------------|-----------------|----------------|----------------|----------------|----------------|------|

# Ca<sub>1-x</sub>M<sub>x</sub>ZrTi<sub>2-2x</sub>Fe<sub>2x</sub>O<sub>7</sub> M=(Ce, Pu, Th, U)

## Ti(1)Ti(3)

N.B. All stated energies are in eV

| Ce                                  | ground    | solid    |           | ground |           | solid    |           | ground |           | solid    |           | ground |           | solid    |        |
|-------------------------------------|-----------|----------|-----------|--------|-----------|----------|-----------|--------|-----------|----------|-----------|--------|-----------|----------|--------|
|                                     | state     | solution |           | state  |           | solution |           | state  |           | solution |           | state  |           | solution |        |
| energy                              | energy    | energy   | energy    | energy | energy    | energy   | energy    | energy | energy    | energy   | energy    | energy | energy    | energy   | energy |
| concentration in solid solution (%) | 3         | 6        |           | 9      |           | 12       |           | 15     |           | 18       |           | 21     |           |          |        |
| number of atoms                     | 2         | 4        |           | 6      |           | 8        |           | 10     |           | 12       |           | 13     |           |          |        |
|                                     | -25154.13 | -11.24   | -25118.38 | -18.66 | -25078.07 | -21.53   | -25042.25 | -28.88 | -25003.97 | -33.78   | -24966.98 | -39.96 | -24930.59 | -25.16   |        |
|                                     | -25154.64 | -11.75   | -25116.81 | -17.10 | -25073.58 | -17.04   | -25041.19 | -27.82 | -25005.75 | -35.55   | -24969.05 | -42.03 | -24933.07 | -27.64   |        |
|                                     | -25153.42 | -10.53   | -25116.41 | -16.70 | -25080.04 | -23.50   | -25043.71 | -30.34 | -25004.38 | -34.18   | -24968.24 | -41.22 | -24932.27 | -26.83   |        |
|                                     | -25153.05 | -10.16   | -25116.39 | -16.68 | -25077.56 | -21.02   | -25042.18 | -28.81 | -25006.19 | -35.99   | -24964.88 | -37.85 | -24931.37 | -25.93   |        |
|                                     | -25153.23 | -10.35   | -25116.24 | -16.53 | -25079.08 | -22.54   | -25043.18 | -29.81 | -25004.10 | -33.91   | -24968.93 | -41.90 | -24933.21 | -27.77   |        |
|                                     | -25154.41 | -11.52   | -25117.41 | -17.69 | -25080.11 | -23.57   | -25042.38 | -29.01 | -25005.27 | -35.08   | -24968.29 | -41.27 | -24924.83 | -19.39   |        |
|                                     | -25154.50 | -11.61   | -25116.54 | -16.82 | -25077.53 | -20.99   | -25043.57 | -30.20 | -25008.73 | -38.53   | -24965.79 | -38.77 | -24925.72 | -20.28   |        |
|                                     | -25153.72 | -10.83   | -25118.08 | -18.36 | -25078.49 | -21.95   | -25036.24 | -22.87 | -25005.38 | -35.18   | -24968.62 | -41.59 | -24933.60 | -28.16   |        |
|                                     | -25154.18 | -11.29   | -25116.82 | -17.10 | -25078.29 | -21.75   | -25040.93 | -27.57 | -25000.35 | -30.15   | -24968.31 | -41.29 | -24927.95 | -22.51   |        |
|                                     | -25153.74 | -10.85   | -25118.97 | -19.26 | -25040.60 | 15.94    | -25006.43 | 6.94   | -24966.44 | 3.76     | -24931.12 | -4.10  | -24929.86 | -24.42   |        |
|                                     | -25154.06 | -11.17   | -25116.68 | -16.97 | -25079.79 | -23.25   | -25042.10 | -28.73 | -25006.55 | -36.35   | -24969.98 | -42.96 | -24929.80 | -24.36   |        |
|                                     | -25154.04 | -11.15   | -25116.26 | -16.54 | -25079.65 | -23.11   | -25041.07 | -27.70 | -24998.35 | -28.15   | -25012.58 | -85.56 | -24934.14 | -28.70   |        |
|                                     | -25153.24 | -10.35   | -25116.62 | -16.90 | -25077.31 | -20.77   | -25040.30 | -26.94 | -25006.69 | -36.49   | -24969.69 | -42.67 | -24931.15 | -25.71   |        |
|                                     | -25154.87 | -11.98   | -25115.05 | -15.34 | -25080.17 | -23.62   | -25043.92 | -30.55 | -25005.21 | -35.01   | -24964.39 | -37.36 | -24930.19 | -24.75   |        |
|                                     | -25154.09 | -11.21   | -25115.71 | -15.99 | -25079.81 | -23.27   | -25040.79 | -27.42 | -25007.20 | -37.00   | -24963.62 | -36.60 | -24931.21 | -25.77   |        |
|                                     | -25153.89 | -11.00   | -25117.99 | -18.27 | -25077.46 | -20.92   | -25043.01 | -29.64 | -25003.46 | -33.27   | -24968.47 | -41.45 | -24930.19 | -24.76   |        |
|                                     | -25154.32 | -11.44   | -25116.05 | -16.33 | -25079.92 | -23.38   | -25043.77 | -30.40 | -25000.31 | -30.12   | -24970.36 | -43.34 | -24931.45 | -26.02   |        |
|                                     | -25151.80 | -8.91    | -25115.57 | -15.86 | -25078.79 | -22.25   | -25041.50 | -28.13 | -25003.06 | -32.86   | -24966.24 | -39.21 | -24933.25 | -27.81   |        |
|                                     | -25153.72 | -10.83   | -25117.32 | -17.60 | -25080.24 | -23.70   | -25040.11 | -26.74 | -25001.94 | -31.74   | -24966.92 | -39.89 | -24928.83 | -23.40   |        |
|                                     | -25153.54 | -10.65   | -25116.31 | -16.59 | -25042.57 | 13.97    | -25001.94 | 11.43  | -24966.75 | 3.45     | -24968.21 | -41.18 | -24931.01 | -25.57   |        |
|                                     | -25153.82 | -10.93   | -25117.74 | -18.03 | -25080.64 | -24.10   | -25041.51 | -28.14 | -25005.77 | -35.57   | -24966.06 | -39.04 | -24933.87 | -28.43   |        |
|                                     | -25152.36 | -9.47    | -25116.58 | -16.87 | -25081.41 | -24.87   | -25042.41 | -29.04 | -25004.17 | -33.98   | -24968.90 | -41.88 | -24928.44 | -23.01   |        |
|                                     | -25153.94 | -11.05   | -25118.33 | -18.61 | -25079.35 | -22.80   | -25041.96 | -28.59 | -25005.32 | -35.13   | -24969.63 | -42.61 | -24932.88 | -27.44   |        |
|                                     | -25151.80 | -8.91    | -25117.40 | -17.68 | -25081.11 | -24.57   | -25041.30 | -27.94 | -25004.82 | -34.63   | -24934.14 | -7.12  | -24933.76 | -28.32   |        |
|                                     | -25153.73 | -10.84   | -25116.92 | -17.21 | -25081.11 | -24.57   | -25044.71 | -31.34 | -25004.61 | -34.42   | -24969.18 | -42.16 | -24930.69 | -25.25   |        |
|                                     | -25154.40 | -11.51   | -25118.42 | -18.70 | -25079.11 | -22.56   | -25040.29 | -26.93 | -25001.70 | -31.51   | -24965.02 | -37.99 | -24931.78 | -26.34   |        |
|                                     | -25154.12 | -11.23   | -25116.78 | -17.07 | -25077.39 | -20.85   | -25041.31 | -27.94 | -25006.47 | -36.27   | -24963.31 | -36.29 | -24927.23 | -21.80   |        |
|                                     | -25153.46 | -10.57   | -25117.45 | -17.74 | -25080.48 | -23.94   | -25043.91 | -30.54 | -25005.58 | -35.38   | -24934.80 | -7.77  | -24934.15 | -28.71   |        |
|                                     | -25154.68 | -11.79   | -25117.21 | -17.49 | -25078.33 | -21.78   | -25040.68 | -27.31 | -25006.15 | -35.96   | -24961.32 | -34.29 | -24928.31 | -22.87   |        |

|           |        |           |        |           |        |           |        |           |        |           |        |           |        |
|-----------|--------|-----------|--------|-----------|--------|-----------|--------|-----------|--------|-----------|--------|-----------|--------|
| -25154.20 | -11.31 | -25117.23 | -17.51 | -25080.35 | -23.81 | -25043.42 | -30.05 | -25006.39 | -36.20 | -24967.59 | -40.57 | -24932.41 | -26.97 |
| -25154.06 | -11.17 | -25116.81 | -17.09 | -25079.71 | -23.17 | -25043.39 | -30.02 | -25008.41 | -38.22 | -24969.21 | -42.19 | -24932.01 | -26.57 |
| -25154.04 | -11.15 | -25117.19 | -17.47 | -25078.06 | -21.52 | -25043.95 | -30.58 | -25001.78 | -31.59 | -24963.37 | -36.35 | -24931.15 | -25.71 |
| -25152.60 | -9.71  | -25116.40 | -16.68 | -25078.29 | -21.74 | -25045.06 | -31.69 | -25005.90 | -35.70 | -24928.44 | -1.41  | -24931.76 | -26.32 |
| -25153.66 | -10.77 | -25117.17 | -17.45 | -25079.38 | -22.83 | -25041.39 | -28.02 | -25006.78 | -36.58 | -24972.04 | -45.01 | -24931.02 | -25.58 |
| -25154.55 | -11.66 | -25118.41 | -18.69 | -25080.66 | -24.12 | -25044.29 | -30.92 | -25006.04 | -35.84 | -24966.97 | -39.94 | -24927.15 | -21.72 |
| -25153.86 | -10.97 | -25117.11 | -17.40 | -25078.79 | -22.25 | -25040.50 | -27.13 | -25006.03 | -35.83 | -24968.95 | -41.93 | -24929.70 | -24.27 |
| -25154.70 | -11.81 | -25117.12 | -17.41 | -25077.70 | -21.16 | -25043.29 | -29.93 | -25005.27 | -35.08 | -24968.89 | -41.86 | -24930.66 | -25.22 |
| -25153.33 | -10.44 | -25116.06 | -16.34 | -25079.39 | -22.85 | -25038.23 | -24.86 | -25007.34 | -37.14 | -25008.58 | -81.55 | -24925.49 | -20.05 |
| -25154.34 | -11.45 | -25116.02 | -16.30 | -25081.56 | -25.02 | -25043.79 | -30.42 | -25006.22 | -36.02 | -24964.52 | -37.50 | -24922.35 | -16.91 |
| -25154.30 | -11.41 | -25116.96 | -17.25 | -25079.02 | -22.48 | -25039.46 | -26.09 | -25003.13 | -32.93 | -24970.27 | -43.25 | -24927.40 | -21.96 |
| -25154.95 | -12.06 | -25116.86 | -17.15 | -25080.49 | -23.95 | -25044.77 | -31.40 | -24969.52 | 0.68   | -24934.86 | -7.83  | -24933.25 | -27.82 |
| -25154.72 | -11.83 | -25080.03 | 19.69  | -25040.88 | 15.66  | -25004.23 | 9.14   | -25002.75 | -32.55 | -24966.29 | -39.27 | -24933.34 | -27.90 |
| -25154.09 | -11.20 | -25116.30 | -16.59 | -25080.90 | -24.36 | -25044.01 | -30.64 | -25006.17 | -35.97 | -24968.38 | -41.36 | -24931.53 | -26.09 |
| -25154.80 | -11.91 | -25115.41 | -15.70 | -25080.42 | -23.88 | -25044.19 | -30.82 | -25005.69 | -35.49 | -24967.09 | -40.07 | -24929.12 | -23.69 |
| -25153.80 | -10.91 | -25115.37 | -15.65 | -25077.72 | -21.17 | -25040.31 | -26.94 | -25004.56 | -34.36 | -24970.95 | -43.92 | -24930.69 | -25.25 |
| -25154.64 | -11.75 | -25117.72 | -18.00 | -25081.32 | -24.77 | -25040.62 | -27.25 | -24969.02 | 1.18   | -24929.72 | -2.70  | -24932.42 | -26.98 |
| -25154.18 | -11.29 | -25079.90 | 19.82  | -25044.56 | 11.98  | -25009.35 | 4.02   | -24968.76 | 1.43   | -24928.56 | -1.54  | -24929.78 | -24.35 |
| -25153.05 | -10.16 | -25115.57 | -15.86 | -25079.75 | -23.21 | -25004.93 | 8.44   | -25007.20 | -37.00 | -24965.73 | -38.70 | -24925.02 | -19.58 |
| -25154.03 | -11.14 | -25116.40 | -16.68 | -25077.90 | -21.36 | -25043.35 | -29.99 | -25004.12 | -33.93 | -24969.78 | -42.75 | -24931.51 | -26.08 |
| -25153.80 | -10.91 | -25117.35 | -17.64 | -25078.79 | -22.25 | -25042.54 | -29.17 | -25007.31 | -37.12 | -24966.31 | -39.29 | -24928.37 | -22.93 |
| -25153.79 | -10.90 | -25116.49 | -16.78 | -25078.95 | -22.41 | -25043.38 | -30.01 | -25004.85 | -34.65 | -24966.45 | -39.42 | -24932.22 | -26.79 |
| -25152.93 | -10.04 | -25117.56 | -17.85 | -25078.44 | -21.90 | -25039.22 | -25.85 | -25004.47 | -34.27 | -25011.03 | -84.01 | -24933.23 | -27.79 |
| -25153.92 | -11.03 | -25115.91 | -16.20 | -25080.69 | -24.15 | -25042.63 | -29.27 | -24928.88 | 41.31  | -24968.25 | -41.23 | -24929.61 | -24.17 |
| -25154.99 | -12.10 | -25079.37 | 20.34  | -25041.96 | 14.58  | -25004.18 | 9.19   | -25007.55 | -37.35 | -24970.56 | -43.54 | -24928.61 | -23.17 |
| -25152.98 | -10.09 | -25116.76 | -17.05 | -25079.97 | -23.43 | -25040.80 | -27.43 | -25002.96 | -32.77 | -24931.53 | -4.51  | -24927.14 | -21.71 |
| -25153.42 | -10.53 | -25117.91 | -18.19 | -25078.79 | -22.25 | -25043.19 | -29.82 | -24999.34 | -29.14 | -24966.77 | -39.75 | -24933.08 | -27.65 |
| -25153.86 | -10.97 | -25116.75 | -17.03 | -25077.61 | -21.07 | -25043.58 | -30.21 | -25007.52 | -37.33 | -24971.00 | -43.98 | -24830.00 | 75.43  |
| -25153.22 | -10.33 | -25117.70 | -17.98 | -25078.88 | -22.34 | -25043.53 | -30.16 | -25007.57 | -37.37 | -24961.91 | -34.89 | -24829.18 | 76.26  |
| -25153.49 | -10.61 | -25116.63 | -16.92 | -25077.59 | -21.05 | -25040.04 | -26.67 | -25004.86 | -34.67 | -24966.94 | -39.92 | -24827.93 | 77.51  |
| -25152.73 | -9.84  | -25115.72 | -16.01 | -25077.84 | -21.30 | -25040.44 | -27.07 | -25001.91 | -31.72 | -24963.73 | -36.71 | -24827.45 | 77.99  |
| -25154.45 | -11.57 | -25119.08 | -19.36 | -25079.53 | -22.98 | -25040.26 | -26.89 | -25004.28 | -34.09 | -24968.35 | -41.33 | -24827.06 | 78.37  |
| -25154.93 | -12.04 | -25116.78 | -17.07 | -25078.08 | -21.53 | -25041.11 | -27.74 | -25003.77 | -33.57 | -24965.37 | -38.34 | -24827.59 | 77.84  |
| -25154.81 | -11.92 | -25115.88 | -16.17 | -25081.21 | -24.67 | -25045.12 | -31.75 | -25001.91 | -31.71 | -24965.14 | -38.11 | -24826.58 | 78.86  |
| -25154.00 | -11.11 | -25116.93 | -17.22 | -25078.81 | -22.27 | -25042.23 | -28.86 | -25001.27 | -31.08 | -24968.69 | -41.67 | -24823.99 | 81.45  |
| -25153.39 | -10.50 | -25116.02 | -16.30 | -25077.57 | -21.03 | -25043.02 | -29.65 | -24963.88 | 6.32   | -24865.27 | 61.75  | -24827.69 | 77.75  |
| -25154.73 | -11.85 | -25115.94 | -16.22 | -25078.50 | -21.96 | -25041.55 | -28.18 | -25002.61 | -32.41 | -24868.34 | 58.68  | -24831.28 | 74.16  |
| -25152.81 | -9.93  | -25116.75 | -17.04 | -25078.99 | -22.45 | -25043.19 | -29.82 | -24923.94 | 46.26  | -24876.59 | 50.44  | -24827.79 | 77.65  |
| -25111.91 | 30.97  | -25065.18 | 34.53  | -25019.14 | 37.40  | -24967.62 | 45.75  | -24919.80 | 50.40  | -24872.73 | 54.29  | -24825.67 | 79.76  |
| -25110.67 | 32.21  | -25062.77 | 36.94  | -25016.21 | 40.33  | -24969.79 | 43.58  | -24921.11 | 49.08  | -24876.51 | 50.52  | -24829.27 | 76.16  |
| -25112.08 | 30.81  | -25064.24 | 35.48  | -25014.36 | 42.18  | -24964.74 | 48.63  | -24922.61 | 47.59  | -24872.58 | 54.44  | -24831.53 | 73.91  |

|           |                 |                 |                 |                 |                 |                 |       |
|-----------|-----------------|-----------------|-----------------|-----------------|-----------------|-----------------|-------|
| -25111.10 | 31.79 -25063.61 | 36.10 -25017.12 | 39.42 -24965.97 | 47.40 -24920.22 | 49.97 -24875.12 | 51.90 -24819.48 | 85.96 |
| -25112.29 | 30.59 -25063.89 | 35.83 -25020.11 | 36.43 -24967.77 | 45.60 -24919.75 | 50.45 -24872.45 | 54.57 -24823.62 | 81.81 |
| -25111.98 | 30.91 -25064.30 | 35.42 -25018.79 | 37.75 -24968.61 | 44.76 -24920.28 | 49.92 -24870.76 | 56.26 -24829.64 | 75.80 |
| -25108.85 | 34.04 -25064.97 | 34.75 -25017.51 | 39.03 -24969.15 | 44.21 -24923.25 | 46.94 -24875.06 | 51.96 -24827.93 | 77.51 |
| -25111.95 | 30.94 -25063.90 | 35.81 -25015.76 | 40.78 -24969.53 | 43.84 -24924.37 | 45.83 -24875.21 | 51.82 -24825.20 | 80.23 |
| -25110.35 | 32.54 -25063.75 | 35.97 -25016.23 | 40.31 -24966.50 | 46.87 -24926.03 | 44.17 -24875.24 | 51.78 -24829.65 | 75.79 |
| -25111.75 | 31.14 -25065.87 | 33.85 -25016.54 | 40.00 -24969.12 | 44.25 -24921.82 | 48.38 -24873.96 | 53.06 -24828.24 | 77.20 |
| -25110.75 | 32.14 -25064.94 | 34.77 -25015.92 | 40.63 -24968.84 | 44.53 -24925.02 | 45.18 -24870.98 | 56.04 -24826.28 | 79.15 |
| -25111.94 | 30.95 -25065.07 | 34.65 -25014.18 | 42.37 -24968.50 | 44.87 -24920.32 | 49.88 -24872.67 | 54.36 -24830.71 | 74.73 |
| -25110.66 | 32.23 -25062.79 | 36.93 -25016.88 | 39.66 -24969.92 | 43.45 -24922.72 | 47.48 -24878.36 | 48.66 -24826.98 | 78.46 |
| -25111.81 | 31.08 -25065.26 | 34.46 -25013.41 | 43.13 -24964.91 | 48.46 -24919.52 | 50.67 -24875.05 | 51.97 -24829.24 | 76.20 |
| -25111.85 | 31.04 -25062.51 | 37.20 -25016.47 | 40.08 -24969.23 | 44.14 -24915.43 | 54.76 -24873.58 | 53.45 -24830.87 | 74.57 |
| -25111.68 | 31.21 -25065.70 | 34.01 -25018.44 | 38.11 -24964.75 | 48.61 -24921.69 | 48.51 -24874.48 | 52.54 -24828.04 | 77.40 |
| -25112.04 | 30.85 -25064.56 | 35.16 -25012.99 | 43.55 -24968.05 | 45.32 -24921.79 | 48.40 -24866.15 | 60.87 -24827.23 | 78.20 |
| -25110.77 | 32.12 -25063.29 | 36.42 -25018.66 | 37.88 -24971.81 | 41.56 -24924.02 | 46.17 -24878.07 | 48.95 -24831.23 | 74.20 |
| -25111.16 | 31.73 -25064.39 | 35.33 -25017.04 | 39.50 -24963.93 | 49.44 -24924.80 | 45.40 -24876.44 | 50.58 -24818.90 | 86.54 |
| -25110.71 | 32.18 -25063.50 | 36.22 -25014.06 | 42.48 -24969.00 | 44.37 -24921.19 | 49.01 -24877.61 | 49.42 -24831.73 | 73.70 |
| -25107.72 | 35.16 -25065.35 | 34.37 -25016.79 | 39.75 -24968.60 | 44.77 -24922.70 | 47.50 -24875.84 | 51.18 -24832.18 | 73.25 |
| -25111.55 | 31.34 -25062.96 | 36.76 -25017.68 | 38.86 -24969.30 | 44.07 -24923.03 | 47.16 -24876.89 | 50.14 -24821.53 | 83.91 |
| -25110.49 | 32.40 -25064.93 | 34.78 -25017.65 | 38.90 -24968.02 | 45.35 -24919.28 | 50.92 -24872.95 | 54.07 -24826.33 | 79.10 |
| -25112.43 | 30.46 -25065.91 | 33.80 -25016.63 | 39.91 -24971.74 | 41.63 -24919.45 | 50.74 -24877.51 | 49.51 -24830.15 | 75.29 |
| -25111.16 | 31.73 -25061.20 | 38.51 -25017.31 | 39.24 -24967.70 | 45.67 -24921.29 | 48.91 -24874.55 | 52.48 -24823.49 | 81.95 |
| -25111.05 | 31.84 -25063.33 | 36.38 -25014.75 | 41.79 -24968.83 | 44.54 -24921.76 | 48.44 -24873.54 | 53.48 -24828.74 | 76.69 |
| -25111.29 | 31.60 -25063.08 | 36.64 -25017.24 | 39.31 -24968.22 | 45.15 -24920.39 | 49.81 -24876.31 | 50.71 -24828.52 | 76.92 |
| -25112.08 | 30.81 -25064.14 | 35.58 -25009.98 | 46.56 -24968.26 | 45.11 -24924.74 | 45.46 -24879.51 | 47.52 -24829.03 | 76.41 |
| -25111.50 | 31.39 -25063.80 | 35.92 -25018.78 | 37.76 -24968.60 | 44.77 -24924.18 | 46.01 -24873.16 | 53.87 -24829.29 | 76.15 |
| -25111.63 | 31.26 -25064.61 | 35.11 -25017.44 | 39.11 -24972.60 | 40.77 -24922.03 | 48.17 -24871.12 | 55.90 -24827.69 | 77.75 |
| -25109.83 | 33.06 -25064.71 | 35.00 -25017.79 | 38.75 -24966.92 | 46.45 -24923.85 | 46.34 -24873.06 | 53.97 -24828.29 | 77.15 |
| -25110.26 | 32.63 -25061.38 | 38.33 -25015.08 | 41.46 -24969.81 | 43.56 -24912.30 | 57.89 -24875.47 | 51.55 -24827.09 | 78.35 |
| -25112.89 | 30.00 -25064.59 | 35.12 -25015.02 | 41.53 -24949.99 | 63.38 -24917.87 | 52.33 -24872.49 | 54.53 -24828.26 | 77.17 |
| -25110.51 | 32.38 -25064.09 | 35.63 -25017.22 | 39.32 -24971.02 | 42.35 -24921.57 | 48.63 -24871.04 | 55.98 -24824.72 | 80.72 |
| -25110.93 | 31.96 -25064.45 | 35.27 -25018.88 | 37.66 -24967.22 | 46.15 -24918.79 | 51.40 -24866.83 | 60.19 -24820.96 | 84.48 |
| -25111.13 | 31.76 -25064.01 | 35.71 -25017.91 | 38.63 -24966.18 | 47.19 -24918.87 | 51.33 -24876.21 | 50.81 -24831.10 | 74.33 |
| -25111.32 | 31.57 -25065.03 | 34.69 -25011.96 | 44.58 -24970.29 | 43.08 -24921.01 | 49.19 -24874.34 | 52.69 -24830.01 | 75.43 |
| -25110.76 | 32.13 -25066.26 | 33.45 -25015.52 | 41.02 -24966.53 | 46.84 -24920.60 | 49.60 -24873.56 | 53.47           |       |
| -25110.27 | 32.62 -25063.73 | 35.99 -25018.43 | 38.11 -24967.07 | 46.30 -24922.73 | 47.46 -24872.01 | 55.01           |       |
| -25112.75 | 30.13 -25064.07 | 35.64 -25012.98 | 43.56 -24970.69 | 42.68 -24922.44 | 47.76 -24875.18 | 51.84           |       |
| -25112.42 | 30.47 -25065.56 | 34.16 -25012.88 | 43.67 -24970.57 | 42.80 -24925.65 | 44.55 -24870.17 | 56.85           |       |
| -25111.52 | 31.37 -25063.04 | 36.68 -25016.18 | 40.36 -24964.42 | 48.95 -24918.71 | 51.48 -24875.17 | 51.86           |       |
| -25111.86 | 31.03 -25063.26 | 36.46 -25018.06 | 38.48 -24967.29 | 46.07 -24920.49 | 49.71 -24875.63 | 51.39           |       |
| -25111.56 | 31.33 -25065.63 | 34.08 -25013.18 | 43.37 -24963.21 | 50.15 -24920.20 | 50.00 -24873.57 | 53.45           |       |



|           |       |           |       |           |       |           |       |           |       |           |       |
|-----------|-------|-----------|-------|-----------|-------|-----------|-------|-----------|-------|-----------|-------|
| -25111.59 | 31.29 | -25064.21 | 35.50 | -25015.80 | 40.75 | -24970.42 | 42.95 | -24918.59 | 51.60 | -24873.97 | 53.05 |
| -25111.05 | 31.84 | -25065.88 | 33.84 | -25016.20 | 40.34 | -24966.34 | 47.03 | -24925.82 | 44.37 | -24875.88 | 51.14 |
| -25112.44 | 30.44 | -25064.80 | 34.92 | -25016.87 | 39.67 | -24969.52 | 43.84 |           |       | -24879.74 | 47.28 |
| -25109.77 | 33.12 | -25063.67 | 36.04 | -25016.14 | 40.40 | -24970.25 | 43.12 |           |       | -24868.62 | 58.40 |
| -25112.46 | 30.43 | -25063.32 | 36.40 | -25013.25 | 43.30 | -24970.58 | 42.79 |           |       |           |       |
| -25111.61 | 31.27 | -25063.67 | 36.05 | -25017.53 | 39.01 | -24964.29 | 49.08 |           |       |           |       |
| -25111.76 | 31.13 |           |       | -25016.77 | 39.77 | -24966.69 | 46.68 |           |       |           |       |
| -25111.05 | 31.84 |           |       | -25015.60 | 40.94 | -24971.85 | 41.52 |           |       |           |       |
| -25110.30 | 32.59 |           |       | -25016.89 | 39.65 |           |       |           |       |           |       |

Average energies

|           |      |           |      |           |      |           |      |           |      |           |      |           |       |
|-----------|------|-----------|------|-----------|------|-----------|------|-----------|------|-----------|------|-----------|-------|
| -25135.05 | 7.84 | -25093.39 | 6.32 | -25049.81 | 6.73 | -25007.83 | 5.54 | -24967.42 | 2.77 | -24924.55 | 2.48 | -24882.98 | 22.45 |
|-----------|------|-----------|------|-----------|------|-----------|------|-----------|------|-----------|------|-----------|-------|

ground state energy  
solid solution energy

**Pu**

concentration in solid solution (%)  
number of atoms

|          | 3        | 6        | 9        | 12       | 15       | 18       | 21       |          |          |          |          |          |          |
|----------|----------|----------|----------|----------|----------|----------|----------|----------|----------|----------|----------|----------|----------|
|          | 2        | 4        | 6        | 8        | 10       | 12       | 13       |          |          |          |          |          |          |
| -25138.6 | -1.74252 | -25086.3 | 1.399932 | -25032.2 | 6.416771 | -24980.9 | 8.534834 | -24928.7 | 11.60507 | -24873.7 | 17.42753 | -24840.5 | 26.07599 |
| -25137.7 | -0.78777 | -25084.7 | 3.013177 | -25029.9 | 8.732853 | -24977.7 | 11.68993 | -24919.9 | 20.40918 | -24872.3 | 18.76134 | -24842.1 | 24.39377 |
| -25138.5 | -1.62104 | -25084.3 | 3.40043  | -25031.4 | 7.193939 | -24982   | 7.416536 | -24926.1 | 14.16249 | -24874.7 | 16.39354 | -24845.7 | 20.7953  |
| -25136.1 | 0.819202 | -25085.1 | 2.628137 | -25030   | 8.562454 | -24980   | 9.413301 | -24926.3 | 13.96165 | -24874.2 | 16.95403 | -24846.3 | 20.19821 |
| -25138.1 | -1.22623 | -25086.7 | 1.001717 | -25031.9 | 6.666796 | -24979.1 | 10.28231 | -24925   | 15.26284 | -24871.7 | 19.44341 | -24845.8 | 20.74565 |
| -25137.9 | -0.95973 | -25084.8 | 2.982988 | -25030.8 | 7.770741 | -24980.3 | 9.158699 | -24927.6 | 12.64335 | -24872.3 | 18.79834 | -24847.2 | 19.34862 |
| -25138   | -1.05537 | -25084.2 | 3.580471 | -25033.3 | 5.313099 | -24977   | 12.4189  | -24926.8 | 13.44766 | -24874.5 | 16.6141  | -24846.2 | 20.32724 |
| -25137.2 | -0.27575 | -25085   | 2.783896 | -25031.8 | 6.832784 | -24981.3 | 8.110947 | -24924.3 | 15.93572 | -24869.2 | 21.944   | -24844.6 | 21.9339  |
| -25137.7 | -0.82495 | -25086   | 1.696374 | -25032.4 | 6.180342 | -24923.1 | 66.29495 | -24873.6 | 66.64892 | -24850.5 | 40.57904 | -24846.6 | 19.96985 |
| -25138.4 | -1.53577 | -25083.8 | 3.929758 | -25028.5 | 10.06414 | -24978.6 | 10.83595 | -24926.4 | 13.89832 | -24872.1 | 19.01931 | -24843.6 | 22.88575 |
| -25137.3 | -0.36582 | -25085.4 | 2.350879 | -25034   | 4.622476 | -24978.1 | 11.32844 | -24923.5 | 16.76935 | -24873.3 | 17.85443 | -24845.3 | 21.19709 |
| -25138.2 | -1.30029 | -25083.7 | 4.033056 | -25032.1 | 6.487689 | -24980.3 | 9.131578 | -24926.5 | 13.74333 | -24869.4 | 21.71439 | -24850.8 | 15.6961  |
| -25137.8 | -0.85635 | -25085.2 | 2.508385 | -25031.1 | 7.533444 | -24980.6 | 8.863424 | -24922.5 | 17.77911 | -24871.6 | 19.54079 | -24848.8 | 17.72676 |
| -25137.7 | -0.76359 | -25087.5 | 0.218405 | -25030.7 | 7.916463 | -24980.6 | 8.829882 | -24926.6 | 13.71294 | -24872.3 | 18.78757 | -24845.1 | 21.4723  |
| -25139.1 | -2.15324 | -25083.9 | 3.861751 | -25031.3 | 7.282445 | -24980.6 | 8.792737 | -24926.8 | 13.46224 | -24872.3 | 18.77498 | -24849.9 | 16.66167 |
| -25137.8 | -0.9134  | -25085.4 | 2.364639 | -25031.9 | 6.704604 | -24977.5 | 11.90927 | -24926.6 | 13.70467 | -24875   | 16.1484  | -24842.2 | 24.35105 |
| -25137.7 | -0.79569 | -25084.7 | 3.015109 | -25031.4 | 7.138751 | -24980.1 | 9.361729 | -24927.4 | 12.89287 | -24873.8 | 17.29124 | -24850.4 | 16.14101 |
| -25138   | -1.12433 | -25085.8 | 1.989214 | -25032.5 | 6.082659 | -24979.5 | 9.90193  | -24927.1 | 13.17104 | -24870.5 | 20.62923 | -24843.2 | 23.35588 |
| -25137.8 | -0.88973 | -25086.7 | 1.038519 | -25035.3 | 3.255234 | -24979.6 | 9.856062 | -24925.3 | 14.99893 | -24873.8 | 17.26288 | -24848.9 | 17.66069 |
| -25137.7 | -0.8339  | -25084   | 3.792549 | -25030.8 | 7.76082  | -24976.1 | 13.31639 | -24923.9 | 16.32847 | -24872.5 | 18.5763  | -24849.5 | 17.03616 |
| -25137.3 | -0.36297 | -25086.7 | 1.088596 | -25031.7 | 6.861391 | -24977.5 | 11.9237  | -24925.4 | 14.82827 | -24872.2 | 18.9274  | -24846.9 | 19.65872 |
| -25138   | -1.13574 | -25085.2 | 2.583618 | -25031.6 | 7.032752 | -24978   | 11.42521 | -24923.9 | 16.37425 | -24874.4 | 16.71152 | -24848.2 | 18.28195 |
| -25139.6 | -2.68291 | -25082.2 | 5.512755 | -25031.1 | 7.458801 | -24982   | 7.443964 | -24924.3 | 16.00755 | -24875.2 | 15.92259 | -24848.6 | 17.89872 |

|          |          |          |          |          |          |          |          |          |          |          |          |          |          |
|----------|----------|----------|----------|----------|----------|----------|----------|----------|----------|----------|----------|----------|----------|
| -25139.4 | -2.51294 | -25084.5 | 3.263913 | -25031.1 | 7.459148 | -24979.7 | 9.76745  | -24922.9 | 17.36782 | -24873.3 | 17.82711 | -24846.3 | 20.22513 |
| -25138.9 | -1.9725  | -25084   | 3.708254 | -25033.2 | 5.342261 | -24979.1 | 10.32313 | -24922.6 | 17.65238 | -24875.4 | 15.73885 | -24846   | 20.48324 |
| -25138.5 | -1.58821 | -25085.2 | 2.556423 | -25029.4 | 9.145647 | -24975   | 14.38228 | -24926.5 | 13.73692 | -24874.2 | 16.91639 | -24846.9 | 19.6342  |
| -25137.1 | -0.19486 | -25086.5 | 1.252001 | -25031.3 | 7.303925 | -24980.3 | 9.16336  | -24927.4 | 12.82267 | -24876.6 | 14.46793 | -24843   | 23.57904 |
| -25138.5 | -1.55112 | -25081.7 | 6.085813 | -25031   | 7.571803 | -24981.9 | 7.566825 | -24927.1 | 13.11939 | -24873.3 | 17.79141 | -24847.2 | 19.2951  |
| -25138.3 | -1.37752 | -25084.3 | 3.466422 | -25030.7 | 7.855201 | -24981.1 | 8.314205 | -24928.4 | 11.82589 | -24879.1 | 11.97815 | -24848.9 | 17.66515 |
| -25138.6 | -1.71922 | -25085.2 | 2.527479 | -25032.9 | 5.643681 | -24972.9 | 16.49427 | -24923.2 | 17.11066 | -24872.4 | 18.74771 | -24847.4 | 19.16178 |
| -25138.1 | -1.1556  | -25084.5 | 3.27     | -24981.1 | 57.52997 | -24923   | 66.3861  | -24877.9 | 62.40133 | -24877.3 | 13.83396 | -24846.8 | 19.68915 |
| -25138.9 | -2.03684 | -25083   | 4.720688 | -25029.9 | 8.671597 | -24977   | 12.43163 | -24927.6 | 12.67706 | -24843.4 | 47.7252  | -24848.2 | 18.30668 |
| -25138.2 | -1.32786 | -25085.1 | 2.644818 | -25032.7 | 5.920435 | -24979.9 | 9.497367 | -24927.3 | 12.92989 | -24868.5 | 22.64663 | -24842.4 | 24.16937 |
| -25139.2 | -2.26691 | -25085.2 | 2.545582 | -25031.2 | 7.419614 | -24980.7 | 8.711615 | -24927.8 | 12.4954  | -24876.2 | 14.86675 | -24849.4 | 17.11221 |
| -25138.1 | -1.18837 | -25083.6 | 4.14219  | -25031.7 | 6.840694 | -24980.4 | 9.056073 | -24924.8 | 15.43302 | -24876.6 | 14.49155 | -24840.8 | 25.68541 |
| -25139   | -2.0468  | -25085.1 | 2.627148 | -25029.9 | 8.67163  | -24978.6 | 10.78203 | -24922.4 | 17.88432 | -24872.8 | 18.27263 | -24844.3 | 22.2003  |
| -25137.3 | -0.35447 | -25085.4 | 2.386641 | -25031.5 | 7.10759  | -24980.5 | 8.953312 | -24925.9 | 14.35788 | -24871.7 | 19.36003 | -24840.5 | 26.04321 |
| -25138.7 | -1.76672 | -25087.4 | 0.374646 | -25029.6 | 9.027699 | -24977   | 12.46375 | -24925.4 | 14.84813 | -24874.9 | 16.24589 | -24843   | 23.50966 |
| -25138.1 | -1.23709 | -25086   | 1.715089 | -25029.8 | 8.814594 | -24980   | 9.438777 | -24928.6 | 11.68905 | -24867.8 | 23.28976 | -24850.1 | 16.41326 |
| -25138.5 | -1.64629 | -25085.5 | 2.207708 | -25033.1 | 5.513262 | -24980.4 | 9.00944  | -24926   | 14.2925  | -24872.8 | 18.33958 | -24847.7 | 18.80305 |
| -25137.6 | -0.72632 | -25082.1 | 5.633785 | -25031.9 | 6.670328 | -24977.1 | 12.28872 | -24927.4 | 12.88557 | -24877.4 | 13.70863 | -24847.2 | 19.36498 |
| -25137.7 | -0.79852 | -25084.3 | 3.459067 | -25033.1 | 5.50911  | -24978.7 | 10.75121 | -24925.6 | 14.70133 | -24876.7 | 14.4132  | -24850.5 | 16.07101 |
| -25138.8 | -1.85998 | -25086.7 | 1.064239 | -25030.1 | 8.520403 | -24979   | 10.38776 | -24925.2 | 15.05912 | -24874   | 17.10544 | -24849.6 | 16.89424 |
| -25136.2 | 0.693418 | -25081.8 | 5.978017 | -25031.3 | 7.237642 | -24976.4 | 13.05965 | -24927.5 | 12.75094 | -24870.2 | 20.89007 | -24848.8 | 17.72969 |
| -25137.6 | -0.70873 | -25086.6 | 1.190184 | -25029.4 | 9.201865 | -24979.7 | 9.74182  | -24923.6 | 16.68228 | -24868.8 | 22.26664 | -24848   | 18.55467 |
| -25138.4 | -1.53762 | -25085.3 | 2.428074 | -25031.9 | 6.696815 | -24979.5 | 9.956791 | -24927.2 | 13.02377 | -24872.9 | 18.25297 | -24849.5 | 17.05225 |
| -25139.2 | -2.27822 | -25084.5 | 3.269161 | -25033   | 5.562619 | -24977.6 | 11.87334 | -24923.5 | 16.72523 | -24874.4 | 16.73215 | -24843.9 | 22.62764 |
| -25138.1 | -1.21847 | -25086.6 | 1.102342 | -25035.6 | 3.025935 | -24978   | 11.42187 | -24920.1 | 20.15358 | -24873.2 | 17.95056 | -24850.1 | 16.39765 |
| -25138.8 | -1.89516 | -25086.6 | 1.191186 | -25033.5 | 5.113332 | -24979.6 | 9.788447 | -24921.5 | 18.80469 | -24872.2 | 18.89386 | -24847.1 | 19.40028 |
| -25137.3 | -0.43379 | -25085.9 | 1.854532 | -25032.8 | 5.777772 | -24977.9 | 11.47826 | -24928   | 12.29187 | -24875.5 | 15.59069 | -24847.1 | 19.42315 |
| -25138.5 | -1.60741 | -25084.3 | 3.461983 | -25031.3 | 7.241795 | -24978.8 | 10.59547 | -24925.4 | 14.83503 | -24877.9 | 13.22707 | -24847.9 | 18.67968 |
| -25139.5 | -2.60547 | -25086.4 | 1.345645 | -25033.3 | 5.242169 | -24980.7 | 8.689011 | -24928.2 | 12.03436 | -24874.3 | 16.81878 | -24846.6 | 19.90096 |
| -25137.7 | -0.80478 | -25084.3 | 3.483992 | -25031.3 | 7.299082 | -24978.1 | 11.29484 | -24928.9 | 11.41636 | -24871.5 | 19.5899  | -24843   | 23.52203 |
| -25137.1 | -0.23512 | -25084.7 | 3.007056 | -25031.1 | 7.508484 | -24979.1 | 10.28788 | -24924.8 | 15.42429 | -24870.6 | 20.51003 | -24845.1 | 21.47493 |
| -25138.2 | -1.31844 | -25083.7 | 4.043702 | -25032.5 | 6.102973 | -24982.6 | 6.858986 | -24926.6 | 13.63652 | -24873.1 | 17.98634 | -24847.2 | 19.32603 |
| -25137.8 | -0.86039 | -25085.8 | 1.915888 | -25033.5 | 5.1232   | -24980.1 | 9.336904 | -24924.2 | 16.05785 | -24870.6 | 20.49713 | -24844.9 | 21.62012 |
| -25138.2 | -1.26446 | -25084.4 | 3.316251 | -25032.3 | 6.246804 | -24978.5 | 10.90847 | -24928.1 | 12.21817 | -24872.3 | 18.81905 | -24850.9 | 15.58913 |
| -25138.7 | -1.7855  | -25085   | 2.745475 | -25030.1 | 8.449415 | -24980   | 9.38794  | -24927.4 | 12.84644 | -24876.1 | 15.03702 | -24846.8 | 19.7266  |
| -25138   | -1.13008 | -25084.8 | 2.945912 | -25034   | 4.568402 | -24974.5 | 14.94276 | -24924.4 | 15.89634 | -24874.8 | 16.26984 | -24847.9 | 18.64399 |
| -25137.8 | -0.91997 | -25082.5 | 5.207459 | -25033   | 5.592534 | -24977   | 12.45635 | -24924.1 | 16.18855 | -24873.6 | 17.51152 | -24845.7 | 20.82843 |
| -25136.2 | 0.72004  | -25083.9 | 3.857213 | -25031.2 | 7.335858 | -24978.5 | 10.97484 | -24925.6 | 14.69727 | -24874.2 | 16.90106 | -24847.1 | 19.38525 |
| -25138.1 | -1.23488 | -25084.8 | 2.896932 | -25035   | 3.613801 | -24979.2 | 10.21248 | -24925.3 | 14.94332 | -24873.2 | 17.94122 | -24845.6 | 20.9228  |
| -25138.4 | -1.48107 | -25086.7 | 1.003775 | -25032.1 | 6.532204 | -24978.1 | 11.36266 | -24922.3 | 17.99447 | -24873.7 | 17.40313 | -24847.9 | 18.62386 |
| -25137.2 | -0.26292 | -25086.8 | 0.950515 | -25031.8 | 6.835034 | -24977.6 | 11.8244  | -24922.4 | 17.84544 | -24877.5 | 13.57005 | -24847.8 | 18.7391  |

|          |          |          |          |          |          |          |          |          |          |          |          |          |          |
|----------|----------|----------|----------|----------|----------|----------|----------|----------|----------|----------|----------|----------|----------|
| -25137.9 | -0.98343 | -25084.3 | 3.437211 | -25034.4 | 4.186811 | -24979.3 | 10.14625 | -24923.9 | 16.37761 | -24869.8 | 21.29234 | -24848.4 | 18.12998 |
| -25138.1 | -1.23371 | -25033.2 | 54.55215 | -25031.3 | 7.276765 | -24976.3 | 13.1614  | -24926.3 | 13.95336 | -24872.6 | 18.53803 | -24842.4 | 24.11884 |
| -25137.7 | -0.77508 | -25084   | 3.787541 | -25031.9 | 6.676284 | -24980.3 | 9.08367  | -24873.8 | 66.41959 | -24874.2 | 16.95631 | -24847.3 | 19.20145 |
| -25139.3 | -2.42391 | -25083.8 | 3.901077 | -25031.4 | 7.182285 | -24979.2 | 10.2421  | -24926   | 14.31064 | -24876.7 | 14.36659 | -24852.2 | 14.29233 |
| -25137.4 | -0.50581 | -25084.4 | 3.310631 | -25032.4 | 6.21205  | -24922.9 | 66.54113 | -24924.9 | 15.35181 | -24872.4 | 18.74329 | -24847.2 | 19.30481 |
| -25138.8 | -1.90218 | -25083.4 | 4.318596 | -24976.4 | 62.19909 | -24977.2 | 12.23237 | -24925.8 | 14.43565 | -24846.7 | 44.44179 | -24847.5 | 18.99015 |
| -25137.1 | -0.16111 | -25086.5 | 1.207562 | -25073   | -34.4048 | -24979.2 | 10.2552  | -24925.9 | 14.37488 | -24874.8 | 16.33262 | -24841.7 | 24.86472 |
| -25137.9 | -1.01115 | -25084.5 | 3.231307 | -25034.3 | 4.274382 | -24979.6 | 9.798493 | -24927.3 | 12.94588 | -24875.3 | 15.78047 | -24846.1 | 20.41156 |
| -25137.8 | -0.87675 | -25084.8 | 2.920401 | -25030.3 | 8.237503 | -24981.2 | 8.178424 | -24925.2 | 15.11427 | -24871.4 | 19.69124 | -24843.2 | 23.34352 |
| -25138.5 | -1.55791 | -25085.4 | 2.321565 | -25032.6 | 6.018866 | -24981.5 | 7.926759 | -24928.5 | 11.76864 | -24872.3 | 18.80324 | -24841.8 | 24.77979 |
| -25139   | -2.05906 | -25084.9 | 2.876464 | -25031.1 | 7.522364 | -24979.2 | 10.23799 | -24929.8 | 10.4854  | -24875.1 | 16.0166  | -24844.2 | 22.36736 |
| -25138.4 | -1.4636  | -25086.4 | 1.347178 | -25031.5 | 7.111103 | -24978.3 | 11.1304  | -24924.2 | 16.11256 | -24872.8 | 18.30198 | -24849.4 | 17.17926 |
| -25138.3 | -1.35883 | -25083.8 | 3.903665 | -25033   | 5.581561 | -24978.8 | 10.64304 | -24925.4 | 14.87269 | -24874.6 | 16.54436 | -24847.7 | 18.80057 |
| -25138.3 | -1.38862 | -25084.7 | 3.035473 | -25031.9 | 6.722539 | -24979.4 | 10.0003  | -24923.9 | 16.4176  | -24876   | 15.08609 | -24849   | 17.51045 |
| -25137.2 | -0.2908  | -25084.8 | 2.985454 | -25031.9 | 6.73067  | -24979.3 | 10.176   | -24926.2 | 14.07362 | -24873.6 | 17.50915 | -24845.6 | 20.95394 |
| -25138.4 | -1.45807 | -25081.5 | 6.241095 | -25029.1 | 9.459222 | -24977.9 | 11.50618 | -24922.7 | 17.52923 | -24876.2 | 14.93883 | -24843.3 | 23.27697 |
| -25137.2 | -0.29305 | -25084.1 | 3.653945 | -25031.4 | 7.207382 | -24980.1 | 9.327006 | -24926.3 | 13.99058 | -24870.1 | 21.03545 | -24850.2 | 16.30964 |
| -25138.1 | -1.16518 | -25084.8 | 2.9376   | -25029.1 | 9.440866 | -24979.3 | 10.09707 | -24925.5 | 14.74221 | -24873.1 | 18.04993 | -24842.5 | 24.03622 |
| -25136.6 | 0.259118 | -25086.1 | 1.694512 | -25033.1 | 5.438172 | -24977.8 | 11.5914  | -24926.9 | 13.33546 | -24871.5 | 19.56623 | -24847.2 | 19.32543 |
| -25138.6 | -1.69055 | -25085.4 | 2.334567 | -25030.7 | 7.873754 | -24974.8 | 14.58375 | -24926.9 | 13.36262 | -24874.4 | 16.71532 | -24844.6 | 21.96615 |
| -25138.5 | -1.56297 | -25084   | 3.763122 | -25032.1 | 6.504636 | -24980.1 | 9.338427 | -24922.9 | 17.40258 | -24871.2 | 19.87625 | -24848.7 | 17.83226 |
| -25138.2 | -1.28986 | -25085.8 | 1.898735 | -25031.5 | 7.12924  | -24980.2 | 9.223611 | -24929.1 | 11.17502 | -24875.7 | 15.40337 | -24846.9 | 19.60651 |
| -25138   | -1.09026 | -25083.7 | 4.076672 | -25030.7 | 7.911577 | -24976.8 | 12.67407 | -24927.6 | 12.69993 | -24874.9 | 16.20758 | -24850.5 | 15.98876 |
| -25140.1 | -3.21073 | -25086.2 | 1.526335 | -25032.2 | 6.359068 | -24980.2 | 9.259035 | -24926.5 | 13.75675 | -24875.9 | 15.20084 | -24846.9 | 19.63785 |
| -25138.7 | -1.81088 | -25084.2 | 3.536444 | -25034.3 | 4.245241 | -24981.2 | 8.214632 | -24925.8 | 14.47771 | -24875.2 | 15.909   | -24888.5 | -21.9439 |
| -25137.5 | -0.57018 | -25086.6 | 1.169941 | -25024.4 | 14.18864 | -24981.6 | 7.865008 | -24927.1 | 13.16304 | -24875.2 | 15.94821 | -24842.4 | 24.14547 |
| -25138.6 | -1.70694 | -25085.8 | 1.966214 | -25031.6 | 6.975629 | -24977.2 | 12.24102 | -24927.8 | 12.45398 | -24871.9 | 19.22359 | -24843.8 | 22.73694 |
| -25137.5 | -0.63783 | -25081.8 | 5.894988 | -25032.2 | 6.380701 | -24978.6 | 10.7893  | -24925.9 | 14.36058 | -24873   | 18.10973 | -24847.4 | 19.16059 |
| -25136.9 | 0.049619 | -25084.3 | 3.42681  | -25031.4 | 7.146465 | -24979   | 10.3927  | -24872.8 | 67.44071 | -24873.1 | 18.01756 | -24846.1 | 20.46645 |
| -25138   | -1.11285 | -25085.7 | 2.010848 | -25029.7 | 8.867132 | -24980.3 | 9.151315 | -24925   | 15.22385 | -24872.7 | 18.44735 | -24847.2 | 19.28597 |
| -25138   | -1.14125 | -25080.7 | 7.023635 | -25032.4 | 6.180452 | -24978.6 | 10.82689 | -24929.8 | 10.51331 | -24872.3 | 18.81351 | -24848.6 | 17.95217 |
| -25138.6 | -1.7216  | -25085.3 | 2.467218 | -25032.2 | 6.351311 | -24979.2 | 10.23171 | -24927.9 | 12.41104 | -24877.8 | 13.33075 | -24850.1 | 16.44166 |
| -25138.6 | -1.67037 | -25085.6 | 2.180317 | -25030.7 | 7.899561 | -24978.3 | 11.08076 | -24923.9 | 16.35163 | -24916.1 | -25.001  | -24848.9 | 17.61138 |
| -25138   | -1.1193  | -25086.4 | 1.337509 | -25031   | 7.5934   | -24979.3 | 10.16306 | -24924.2 | 16.04266 | -24849.1 | 41.97445 | -24842.8 | 23.70381 |
| -25138.1 | -1.16012 | -25086.9 | 0.844695 | -25030.1 | 8.48789  | -24980.1 | 9.290821 | -24927.2 | 13.10643 | -24916.4 | -25.2446 | -24847.3 | 19.24318 |
| -25137.9 | -0.9959  | -25084.4 | 3.381186 | -25032.2 | 6.360908 | -24980.3 | 9.106331 | -24927.9 | 12.35966 | -24875.1 | 16.0342  | -24849.5 | 17.0711  |
| -25138.2 | -1.29159 | -25085.1 | 2.670382 | -25031.8 | 6.792893 | -24979.2 | 10.2332  | -24926   | 14.22004 | -24870.8 | 20.30048 | -24845   | 21.56563 |
| -25137.8 | -0.87855 | -25085   | 2.731867 | -25031.2 | 7.345748 | -24979   | 10.40114 | -24926.3 | 13.99683 | -24874.1 | 16.97059 | -24848   | 18.52798 |
| -25137.9 | -0.96013 | -25083.4 | 4.379365 | -25031.9 | 6.69458  | -24976.5 | 12.91321 | -24925.7 | 14.58623 | -24871.7 | 19.39563 | -24848.9 | 17.66546 |
| -25138.4 | -1.48767 | -25086.5 | 1.231479 | -25032.1 | 6.443911 | -24979.1 | 10.35046 | -24928.3 | 11.98355 | -24873.4 | 17.69778 | -24846.7 | 19.87251 |
| -25138   | -1.06975 | -25083.1 | 4.60114  | -25032.7 | 5.854607 | -24981.5 | 7.917755 | -24926.7 | 13.56938 | -24871.5 | 19.59256 | -24847.3 | 19.18668 |

|          |          |          |          |          |          |          |          |          |          |          |          |          |          |
|----------|----------|----------|----------|----------|----------|----------|----------|----------|----------|----------|----------|----------|----------|
| -25137.3 | -0.37925 | -25085.1 | 2.646546 | -25031.7 | 6.931754 | -24977.9 | 11.5725  | -24926.3 | 13.97111 | -24875.5 | 15.56105 | -24849.9 | 16.66598 |
| -25137.4 | -0.48841 | -25086.1 | 1.609699 | -25033.3 | 5.265933 | -24975.8 | 13.65017 | -24917.8 | 22.44354 | -24877.7 | 13.36936 | -24847.3 | 19.27777 |
| -25137.9 | -1.03019 | -25084.7 | 3.081305 | -25031.9 | 6.674172 | -24979.6 | 9.863057 | -24922.7 | 17.55126 | -24876.2 | 14.8734  |          |          |
| -25136.4 | 0.466204 | -25086.1 | 1.639016 | -25022.5 | 16.04458 | -24979   | 10.47698 | -24872.7 | 67.53232 | -24874.8 | 16.31047 |          |          |
| -25137.1 | -0.16838 | -25085.8 | 1.981806 | -25033.9 | 4.706258 | -24978.4 | 11.05093 | -24929   | 11.24274 | -24872.1 | 19.0058  |          |          |
| -25138.1 | -1.23713 | -25087   | 0.77157  | -25030.4 | 8.20114  | -24975.8 | 13.61132 | -24927.6 | 12.70148 | -24868.8 | 22.28352 |          |          |
| -25139.2 | -2.27474 | -25085.7 | 2.047501 | -25033.2 | 5.426602 | -24925.4 | 64.0715  | -24923.2 | 17.11339 | -24869.6 | 21.46737 |          |          |
| -25138.1 | -1.19664 | -25085.4 | 2.384249 | -24980.4 | 58.23309 | -24979.7 | 9.740978 |          |          | -24876.2 | 14.9528  |          |          |
| -25137.6 | -0.71182 | -25085.8 | 1.916233 | -25030.7 | 7.908742 | -24978.9 | 10.49939 |          |          | -24872.1 | 18.98183 |          |          |
| -25138.6 | -1.67673 |          |          | -25030.7 | 7.912793 | -24979.9 | 9.559509 |          |          | -24847.5 | 43.59989 |          |          |
| -25139.3 | -2.38445 |          |          | -25032.2 | 6.394942 | -24978.7 | 10.73514 |          |          | -24874.1 | 17.00334 |          |          |
| -25136.5 | 0.415469 |          |          |          |          |          |          |          |          | -24874.9 | 16.22927 |          |          |
| -25140.3 | -3.40015 |          |          |          |          |          |          |          |          | -24873.6 | 17.49934 |          |          |
| -25138.7 | -1.79426 |          |          |          |          |          |          |          |          | -24873.8 | 17.28945 |          |          |

Average energies    -25138.08    -1.17 -25084.48    3.26 -25030.63    7.96 -24977.08    12.35 -24923.42    16.85 -24873.14    17.97 -24847.02    19.51

ground    solid  
state    solution  
energy    energy

# Th

concentration in solid solution (%)  
number of atoms

|           | 3     | 6         | 9    | 12        | 15    | 18        | 21    |           |       |           |       |           |       |
|-----------|-------|-----------|------|-----------|-------|-----------|-------|-----------|-------|-----------|-------|-----------|-------|
|           | 2     | 4         | 6    | 8         | 10    | 12        | 13    |           |       |           |       |           |       |
| -25143.63 | -1.09 | -25095.81 | 3.20 | -25044.63 | 10.85 | -24999.81 | 12.14 | -24947.01 | 21.41 | -24877.51 | 47.38 | -24884.12 | 19.01 |
| -25143.90 | -1.37 | -25094.88 | 4.12 | -25048.55 | 6.93  | -25001.39 | 10.56 | -24954.62 | 13.80 | -24900.33 | 24.56 | -24885.21 | 17.92 |
| -25142.77 | -0.23 | -25098.27 | 0.73 | -25049.29 | 6.19  | -24997.60 | 14.35 | -24954.07 | 14.35 | -24902.59 | 22.30 | -24886.28 | 16.85 |
| -25143.21 | -0.68 | -25094.83 | 4.18 | -25046.67 | 8.81  | -25003.68 | 8.27  | -24904.24 | 64.18 | -24884.16 | 40.73 | -24879.06 | 24.06 |
| -25144.60 | -2.06 | -25095.45 | 3.55 | -25048.99 | 6.49  | -25000.30 | 11.65 | -24952.14 | 16.28 | -24907.18 | 17.72 | -24878.82 | 24.31 |
| -25143.45 | -0.91 | -25095.19 | 3.81 | -25048.21 | 7.27  | -25001.43 | 10.52 | -24950.11 | 18.31 | -24906.98 | 17.92 | -24881.72 | 21.41 |
| -25143.50 | -0.97 | -25095.72 | 3.28 | -25047.69 | 7.78  | -25001.53 | 10.42 | -24949.08 | 19.34 | -24900.31 | 24.58 | -24879.24 | 23.89 |
| -25143.45 | -0.91 | -25096.09 | 2.91 | -25051.07 | 4.41  | -24999.63 | 12.32 | -24949.07 | 19.35 | -24904.36 | 20.53 | -24883.37 | 19.76 |
| -25143.14 | -0.61 | -25094.82 | 4.18 | -25048.75 | 6.73  | -25000.39 | 11.56 | -24956.26 | 12.16 | -24907.60 | 17.29 | -24878.73 | 24.40 |
| -25144.83 | -2.30 | -25096.73 | 2.27 | -25047.48 | 7.99  | -25002.73 | 9.22  | -24953.86 | 14.56 | -24903.03 | 21.86 | -24881.26 | 21.87 |
| -25144.99 | -2.45 | -25096.90 | 2.11 | -25050.79 | 4.68  | -24999.93 | 12.01 | -24949.58 | 18.84 | -24907.41 | 17.48 | -24879.24 | 23.89 |
| -25142.16 | 0.37  | -25096.58 | 2.42 | -25048.19 | 7.29  | -24997.04 | 14.91 | -24948.57 | 19.85 | -24900.44 | 24.45 | -24883.59 | 19.54 |
| -25143.54 | -1.00 | -25097.30 | 1.70 | -25047.35 | 8.13  | -24998.99 | 12.96 | -24945.81 | 22.61 | -24905.32 | 19.58 | -24882.70 | 20.43 |
| -25143.47 | -0.94 | -25095.02 | 3.98 | -25047.93 | 7.54  | -25001.15 | 10.80 | -24950.85 | 17.57 | -24905.31 | 19.59 | -24882.36 | 20.77 |
| -25143.38 | -0.85 | -25095.20 | 3.81 | -25048.46 | 7.02  | -25001.31 | 10.64 | -24953.85 | 14.57 | -24899.79 | 25.10 | -24880.48 | 22.65 |
| -25143.65 | -1.11 | -25094.80 | 4.21 | -25048.45 | 7.03  | -25001.47 | 10.48 | -24955.14 | 13.28 | -24904.25 | 20.64 | -24882.68 | 20.45 |
| -25143.50 | -0.96 | -25095.38 | 3.62 | -25046.53 | 8.94  | -25000.82 | 11.13 | -24953.38 | 15.04 | -24903.08 | 21.81 | -24882.38 | 20.75 |
| -25142.71 | -0.18 | -25094.74 | 4.27 | -25048.76 | 6.72  | -25002.70 | 9.25  | -24953.63 | 14.79 | -24905.72 | 19.18 | -24883.48 | 19.65 |

|           |       |           |       |           |       |           |       |           |        |           |       |           |       |
|-----------|-------|-----------|-------|-----------|-------|-----------|-------|-----------|--------|-----------|-------|-----------|-------|
| -25144.18 | -1.64 | -25095.57 | 3.44  | -25050.18 | 5.30  | -25001.21 | 10.74 | -24952.69 | 15.73  | -24908.25 | 16.64 | -24875.25 | 27.88 |
| -25143.91 | -1.37 | -25094.30 | 4.71  | -25048.53 | 6.94  | -24999.50 | 12.45 | -24947.08 | 21.34  | -24905.94 | 18.95 | -24882.79 | 20.34 |
| -25144.27 | -1.73 | -25091.53 | 7.47  | -25046.57 | 8.91  | -24999.82 | 12.13 | -24991.37 | -22.95 | -24907.22 | 17.67 | -24883.17 | 19.95 |
| -25143.78 | -1.24 | -25095.14 | 3.86  | -25048.83 | 6.65  | -24999.88 | 12.07 | -24953.98 | 14.44  | -24900.88 | 24.01 | -24883.64 | 19.49 |
| -25144.58 | -2.05 | -25096.05 | 2.96  | -25050.47 | 5.01  | -25002.39 | 9.55  | -24953.34 | 15.08  | -24906.00 | 18.89 | -24884.00 | 19.13 |
| -25142.55 | -0.01 | -25094.93 | 4.08  | -25048.38 | 7.10  | -25000.94 | 11.01 | -24949.52 | 18.90  | -24903.31 | 21.58 | -24881.30 | 21.83 |
| -25142.93 | -0.40 | -25094.63 | 4.37  | -25046.80 | 8.68  | -24995.94 | 16.01 | -24952.45 | 15.97  | -24901.07 | 23.82 | -24879.35 | 23.78 |
| -25142.07 | 0.46  | -25096.68 | 2.32  | -25049.39 | 6.09  | -25001.18 | 10.77 | -24951.85 | 16.57  | -24905.54 | 19.36 | -24881.69 | 21.44 |
| -25144.06 | -1.52 | -25096.32 | 2.69  | -25048.97 | 6.51  | -24998.44 | 13.50 | -24953.36 | 15.07  | -24902.27 | 22.62 | -24878.56 | 24.57 |
| -25142.41 | 0.13  | -25096.32 | 2.68  | -25048.69 | 6.79  | -25002.31 | 9.64  | -24952.11 | 16.31  | -24904.35 | 20.54 | -24879.93 | 23.20 |
| -25145.37 | -2.83 | -25095.65 | 3.36  | -25049.03 | 6.45  | -24999.13 | 12.81 | -24951.23 | 17.19  | -24907.26 | 17.63 | -24884.54 | 18.58 |
| -25142.62 | -0.08 | -25097.17 | 1.84  | -25047.95 | 7.53  | -25000.98 | 10.97 | -24951.67 | 16.75  | -24900.90 | 23.99 | -24880.49 | 22.64 |
| -25141.33 | 1.20  | -25096.49 | 2.51  | -25050.32 | 5.16  | -24998.45 | 13.50 | -24945.04 | 23.38  | -24909.68 | 15.21 | -24879.34 | 23.78 |
| -25142.74 | -0.21 | -25091.87 | 7.13  | -25046.63 | 8.85  | -24999.82 | 12.13 | -24949.45 | 18.97  | -24905.32 | 19.57 | -24880.25 | 22.87 |
| -25143.44 | -0.91 | -25096.51 | 2.50  | -25048.45 | 7.03  | -25000.97 | 10.98 | -24954.18 | 14.24  | -24906.04 | 18.85 | -24886.25 | 16.88 |
| -25144.16 | -1.62 | -25095.12 | 3.88  | -25048.64 | 6.84  | -25003.10 | 8.85  | -24954.04 | 14.38  | -24906.38 | 18.51 | -24884.47 | 18.66 |
| -25141.34 | 1.20  | -25096.14 | 2.87  | -25049.15 | 6.33  | -25000.38 | 11.57 | -24952.75 | 15.67  | -24903.26 | 21.63 | -24882.88 | 20.25 |
| -25143.28 | -0.75 | -25095.71 | 3.30  | -25050.09 | 5.39  | -24999.67 | 12.28 | -24954.64 | 13.78  | -24903.74 | 21.15 | -24882.44 | 20.69 |
| -25143.65 | -1.11 | -25094.55 | 4.46  | -25049.99 | 5.48  | -25001.22 | 10.73 | -24951.84 | 16.58  | -24903.75 | 21.15 | -24884.49 | 18.64 |
| -25144.88 | -2.35 | -25094.37 | 4.63  | -25048.39 | 7.09  | -24999.32 | 12.63 | -24953.50 | 14.92  | -24902.68 | 22.21 | -24883.64 | 19.48 |
| -25144.30 | -1.77 | -25096.74 | 2.27  | -25050.24 | 5.23  | -25000.11 | 11.84 | -24951.47 | 16.95  | -24902.16 | 22.73 | -24882.07 | 21.06 |
| -25143.31 | -0.77 | -25099.12 | -0.12 | -25049.32 | 6.16  | -24998.31 | 13.63 | -24949.75 | 18.67  | -24906.09 | 18.80 | -24870.71 | 32.42 |
| -25142.33 | 0.20  | -25094.02 | 4.99  | -25047.58 | 7.90  | -24999.02 | 12.93 | -24953.87 | 14.55  | -24901.16 | 23.73 | -24874.85 | 28.27 |
| -25143.85 | -1.32 | -25096.71 | 2.29  | -25047.75 | 7.73  | -24996.73 | 15.22 | -24955.22 | 13.20  | -24906.44 | 18.45 | -24878.36 | 24.77 |
| -25145.61 | -3.08 | -25095.87 | 3.13  | -25045.60 | 9.88  | -25001.79 | 10.16 | -24952.86 | 15.56  | -24903.33 | 21.56 | -24882.20 | 20.93 |
| -25143.37 | -0.84 | -25096.66 | 2.35  | -25046.62 | 8.85  | -25004.41 | 7.54  | -24953.53 | 14.89  | -24905.22 | 19.67 | -24880.69 | 22.43 |
| -25143.32 | -0.79 | -25095.19 | 3.82  | -25046.98 | 8.50  | -24998.87 | 13.08 | -24952.18 | 16.24  | -24901.23 | 23.66 | -24882.95 | 20.18 |
| -25143.91 | -1.37 | -25096.04 | 2.97  | -25049.25 | 6.23  | -24998.08 | 13.87 | -24953.05 | 15.37  | -24902.69 | 22.20 | -24877.67 | 25.45 |
| -25144.79 | -2.25 | -25094.96 | 4.05  | -25045.60 | 9.88  | -24954.22 | 57.73 | -24951.85 | 16.57  | -24904.69 | 20.20 | -24883.65 | 19.48 |
| -25144.12 | -1.58 | -25094.77 | 4.24  | -25049.04 | 6.44  | -24999.67 | 12.28 | -24953.27 | 15.15  | -24890.94 | 33.95 | -24881.48 | 21.65 |
| -25143.90 | -1.36 | -25092.99 | 6.02  | -25045.88 | 9.60  | -25000.38 | 11.56 | -24949.75 | 18.67  | -24878.44 | 46.45 | -24883.55 | 19.58 |
| -25145.05 | -2.51 | -25097.67 | 1.34  | -24998.45 | 57.03 | -24999.65 | 12.30 | -24954.69 | 13.73  | -24905.55 | 19.34 | -24880.26 | 22.86 |
| -25144.01 | -1.48 | -25047.74 | 51.27 | -25047.94 | 7.54  | -24998.67 | 13.28 | -24905.69 | 62.73  | -24900.86 | 24.03 | -24880.93 | 22.20 |
| -25144.70 | -2.17 | -25092.66 | 6.35  | -25049.27 | 6.21  | -25001.58 | 10.37 | -24951.65 | 16.77  | -24903.48 | 21.41 | -24875.49 | 27.64 |
| -25144.44 | -1.90 | -25096.23 | 2.77  | -25048.74 | 6.74  | -25001.02 | 10.92 | -24953.92 | 14.50  | -24905.93 | 18.96 | -24882.62 | 20.50 |
| -25144.10 | -1.57 | -25095.68 | 3.32  | -25047.33 | 8.15  | -24997.41 | 14.54 | -24947.44 | 20.98  | -24906.70 | 18.20 | -24883.92 | 19.21 |
| -25143.34 | -0.80 | -25095.53 | 3.47  | -25042.84 | 12.63 | -24995.72 | 16.23 | -24953.93 | 14.49  | -24906.43 | 18.46 | -24873.53 | 29.60 |
| -25143.84 | -1.30 | -25096.52 | 2.48  | -25047.77 | 7.71  | -24998.35 | 13.60 | -24954.13 | 14.29  | -24905.26 | 19.64 | -24880.27 | 22.85 |
| -25142.54 | -0.01 | -25094.07 | 4.93  | -25047.72 | 7.76  | -25000.99 | 10.96 | -24949.81 | 18.61  | -24902.13 | 22.76 | -24880.97 | 22.15 |
| -25143.98 | -1.44 | -25096.44 | 2.57  | -25049.60 | 5.88  | -25000.70 | 11.25 | -24953.11 | 15.31  | -24907.71 | 17.18 | -24876.62 | 26.51 |
| -25142.79 | -0.26 | -25096.23 | 2.78  | -25045.49 | 9.99  | -24998.32 | 13.63 | -24955.50 | 12.92  | -24903.25 | 21.65 | -24875.37 | 27.76 |

|           |       |           |       |           |       |           |       |           |       |           |       |           |       |
|-----------|-------|-----------|-------|-----------|-------|-----------|-------|-----------|-------|-----------|-------|-----------|-------|
| -25143.71 | -1.18 | -25093.39 | 5.62  | -25045.35 | 10.12 | -25000.23 | 11.72 | -24954.56 | 13.86 | -24905.94 | 18.95 | -24880.27 | 22.85 |
| -25143.70 | -1.17 | -25096.28 | 2.73  | -25049.87 | 5.61  | -25001.16 | 10.78 | -24953.64 | 14.78 | -24903.23 | 21.66 | -24878.87 | 24.26 |
| -25143.99 | -1.46 | -25095.52 | 3.49  | -25047.69 | 7.79  | -24999.85 | 12.10 | -24953.30 | 15.12 | -24901.97 | 22.92 | -24873.83 | 29.30 |
| -25143.56 | -1.02 | -25096.82 | 2.18  | -25049.46 | 6.01  | -24998.26 | 13.68 | -24946.98 | 21.44 | -24896.55 | 28.34 | -24884.11 | 19.02 |
| -25143.18 | -0.65 | -25095.99 | 3.01  | -25047.24 | 8.23  | -24999.25 | 12.70 | -24953.31 | 15.11 | -24903.27 | 21.62 | -24880.20 | 22.93 |
| -25143.82 | -1.28 | -25096.81 | 2.19  | -25048.16 | 7.32  | -24997.17 | 14.78 | -24952.95 | 15.47 | -24898.93 | 25.96 | -24882.29 | 20.84 |
| -25142.62 | -0.09 | -25095.35 | 3.66  | -25048.05 | 7.43  | -25001.20 | 10.75 | -24953.00 | 15.42 | -24907.02 | 17.88 | -24879.76 | 23.37 |
| -25141.90 | 0.63  | -25094.75 | 4.26  | -25049.10 | 6.38  | -24999.18 | 12.77 | -24950.93 | 17.49 | -24905.55 | 19.34 | -24880.65 | 22.48 |
| -25142.62 | -0.09 | -25097.04 | 1.97  | -25047.76 | 7.72  | -24998.33 | 13.62 | -24955.06 | 13.36 | -24901.60 | 23.29 | -24878.75 | 24.38 |
| -25144.26 | -1.73 | -25095.50 | 3.50  | -25047.37 | 8.11  | -25000.90 | 11.05 | -24953.94 | 14.48 | -24906.03 | 18.86 | -24884.05 | 19.08 |
| -25144.59 | -2.06 | -25095.03 | 3.98  | -25043.21 | 12.27 | -25000.22 | 11.73 | -24952.72 | 15.70 | -24903.00 | 21.89 | -24881.24 | 21.89 |
| -25144.47 | -1.94 | -25096.87 | 2.14  | -25048.53 | 6.94  | -24997.35 | 14.60 | -24953.57 | 14.85 | -24904.98 | 19.91 | -24881.03 | 22.09 |
| -25143.66 | -1.12 | -25095.09 | 3.91  | -25049.02 | 6.46  | -24996.34 | 15.61 | -24953.06 | 15.36 | -24884.72 | 40.18 | -24875.80 | 27.33 |
| -25144.85 | -2.31 | -25093.44 | 5.57  | -25046.45 | 9.02  | -25002.38 | 9.57  | -24952.75 | 15.67 | -24904.86 | 20.03 | -24880.73 | 22.40 |
| -25143.43 | -0.89 | -25097.40 | 1.60  | -25041.43 | 14.05 | -25003.57 | 8.38  | -24903.37 | 65.05 | -24904.43 | 20.46 | -24871.20 | 31.92 |
| -25144.01 | -1.47 | -25094.49 | 4.51  | -25046.13 | 9.35  | -24999.62 | 12.33 | -24948.58 | 19.85 | -24908.55 | 16.34 | -24881.34 | 21.79 |
| -25142.16 | 0.38  | -25095.40 | 3.60  | -25049.06 | 6.41  | -25002.97 | 8.98  | -24954.14 | 14.29 | -24904.84 | 20.05 | -24877.15 | 25.98 |
| -25138.66 | 3.87  | -25094.80 | 4.21  | -25050.02 | 5.45  | -24998.15 | 13.80 | -24953.53 | 14.89 | -24905.78 | 19.11 | -24881.70 | 21.43 |
| -25143.71 | -1.18 | -25093.52 | 5.48  | -25049.90 | 5.57  | -25003.65 | 8.29  | -24949.61 | 18.81 | -24899.98 | 24.92 | -24878.25 | 24.87 |
| -25142.07 | 0.47  | -25094.71 | 4.29  | -25048.37 | 7.10  | -24995.40 | 16.55 | -24950.87 | 17.55 | -24906.98 | 17.92 | -24876.73 | 26.40 |
| -25143.76 | -1.23 | -25096.73 | 2.28  | -25047.24 | 8.24  | -24948.90 | 63.05 | -24954.80 | 13.62 | -24902.91 | 21.98 | -24882.20 | 20.92 |
| -25144.67 | -2.14 | -25095.99 | 3.01  | -25048.60 | 6.88  | -25001.32 | 10.63 | -24954.09 | 14.33 | -24907.73 | 17.16 | -24881.25 | 21.88 |
| -25143.70 | -1.17 | -25094.80 | 4.20  | -25047.79 | 7.69  | -25002.41 | 9.54  | -24951.51 | 16.91 | -24903.63 | 21.27 | -24879.94 | 23.19 |
| -25143.45 | -0.91 | -25095.62 | 3.38  | -25049.45 | 6.03  | -24955.00 | 56.95 | -24954.85 | 13.57 | -24884.15 | 40.74 | -24880.61 | 22.52 |
| -25143.21 | -0.67 | -25096.79 | 2.21  | -25049.03 | 6.44  | -24999.03 | 12.92 | -24950.20 | 18.22 | -24899.95 | 24.94 | -24875.16 | 27.97 |
| -25143.24 | -0.71 | -25096.03 | 2.98  | -25048.89 | 6.59  | -25001.10 | 10.85 | -24951.26 | 17.16 | -24881.15 | 43.74 | -24881.94 | 21.19 |
| -25144.09 | -1.56 | -25095.75 | 3.26  | -24999.73 | 55.75 | -24998.24 | 13.71 | -24903.53 | 64.89 | -24905.44 | 19.45 | -24876.66 | 26.47 |
| -25144.44 | -1.90 | -25098.10 | 0.91  | -25049.08 | 6.40  | -25002.62 | 9.33  | -24954.80 | 13.62 | -24903.75 | 21.14 | -24874.76 | 28.36 |
| -25142.88 | -0.35 | -25095.58 | 3.42  | -25047.02 | 8.45  | -25000.75 | 11.20 | -24945.49 | 22.93 | -24875.28 | 49.61 | -24882.18 | 20.95 |
| -25143.56 | -1.03 | -25046.58 | 52.43 | -25045.70 | 9.77  | -25000.16 | 11.79 | -24904.29 | 64.13 | -24903.44 | 21.45 | -24884.05 | 19.08 |
| -25143.83 | -1.29 | -25095.42 | 3.58  | -25043.71 | 11.77 | -25000.29 | 11.66 | -24945.79 | 22.63 | -24905.01 | 19.88 | -24875.87 | 27.26 |
| -25143.05 | -0.52 | -25097.47 | 1.54  | -25044.69 | 10.79 | -24999.96 | 11.99 | -24948.28 | 20.14 | -24904.03 | 20.86 | -24880.09 | 23.03 |
| -25143.13 | -0.59 | -25097.44 | 1.57  | -25049.21 | 6.26  | -24999.67 | 12.28 | -24949.70 | 18.72 | -24894.66 | 30.23 | -24884.53 | 18.60 |
| -25143.28 | -0.75 | -25096.90 | 2.10  | -25047.08 | 8.40  | -25000.08 | 11.87 | -24947.89 | 20.53 | -24908.17 | 16.73 | -24877.73 | 25.39 |
| -25145.40 | -2.87 | -25094.68 | 4.33  | -25047.77 | 7.71  | -24998.54 | 13.41 | -24950.76 | 17.66 | -24906.28 | 18.61 | -24879.45 | 23.67 |
| -25144.69 | -2.16 | -25096.20 | 2.81  | -25042.08 | 13.40 | -25000.87 | 11.08 | -24951.07 | 17.35 | -24904.54 | 20.35 | -24880.64 | 22.49 |
| -25143.61 | -1.07 | -25095.79 | 3.21  | -25047.07 | 8.41  | -24997.45 | 14.50 | -24954.19 | 14.23 | -24904.43 | 20.46 | -24874.75 | 28.38 |
| -25143.59 | -1.05 | -25096.67 | 2.34  | -25050.23 | 5.25  | -25000.13 | 11.82 | -24953.44 | 14.98 | -24906.92 | 17.97 | -24884.63 | 18.50 |
| -25144.01 | -1.47 | -25095.16 | 3.85  | -25048.00 | 7.48  | -24999.60 | 12.35 | -24944.49 | 23.94 | -24907.25 | 17.64 | -24876.25 | 26.87 |
| -25143.24 | -0.71 | -25094.61 | 4.39  | -25046.79 | 8.69  | -25002.30 | 9.65  | -24948.45 | 19.97 | -24907.30 | 17.59 | -24877.09 | 26.04 |
| -25145.70 | -3.17 | -25091.63 | 7.38  | -25047.93 | 7.54  | -24998.61 | 13.34 | -24949.00 | 19.42 | -24901.77 | 23.12 | -24879.26 | 23.87 |

|           |       |           |      |           |       |           |       |           |        |           |       |           |       |
|-----------|-------|-----------|------|-----------|-------|-----------|-------|-----------|--------|-----------|-------|-----------|-------|
| -25143.24 | -0.70 | -25095.54 | 3.47 | -25045.27 | 10.21 | -24999.62 | 12.33 | -24952.79 | 15.63  | -24908.74 | 16.15 | -24881.81 | 21.32 |
| -25144.80 | -2.27 | -25096.05 | 2.96 | -25049.11 | 6.37  | -25000.60 | 11.35 | -24954.20 | 14.22  | -24905.55 | 19.35 | -24880.06 | 23.07 |
| -25144.11 | -1.58 | -25096.19 | 2.82 | -25047.41 | 8.06  | -25000.24 | 11.70 | -24951.18 | 17.24  | -24908.39 | 16.50 | -24877.62 | 25.50 |
| -25142.41 | 0.12  | -25094.67 | 4.34 | -25049.82 | 5.66  | -24998.77 | 13.18 | -24953.30 | 15.12  | -24901.89 | 23.00 | -24883.00 | 20.12 |
| -25143.76 | -1.23 | -25095.37 | 3.63 | -25046.65 | 8.83  | -24999.91 | 12.04 | -24952.57 | 15.85  | -24900.45 | 24.44 | -24883.62 | 19.51 |
| -25143.16 | -0.62 | -25096.89 | 2.12 | -25050.44 | 5.04  | -24995.29 | 16.65 | -24955.87 | 12.55  | -24900.15 | 24.75 | -24882.53 | 20.60 |
| -25144.64 | -2.11 | -25095.87 | 3.14 | -25046.03 | 9.45  | -25002.49 | 9.46  | -24952.61 | 15.81  | -24904.83 | 20.06 |           |       |
| -25143.10 | -0.57 | -25097.43 | 1.57 | -25047.97 | 7.51  | -25002.60 | 9.35  | -24947.32 | 21.10  | -24903.14 | 21.75 |           |       |
| -25143.57 | -1.03 | -25096.09 | 2.91 | -25045.28 | 10.20 | -25001.20 | 10.75 | -24954.39 | 14.03  | -24908.26 | 16.63 |           |       |
| -25143.41 | -0.87 | -25096.17 | 2.84 | -25046.17 | 9.31  | -24998.56 | 13.39 | -24950.97 | 17.45  | -24901.05 | 23.85 |           |       |
| -25143.38 | -0.85 | -25096.21 | 2.80 | -25051.72 | 3.75  | -24993.85 | 18.10 | -24955.06 | 13.36  | -24903.71 | 21.18 |           |       |
| -25143.87 | -1.34 | -25094.58 | 4.42 | -25048.54 | 6.94  | -24999.53 | 12.42 | -24994.92 | -26.50 | -24904.96 | 19.93 |           |       |
| -25143.58 | -1.04 | -25094.70 | 4.31 | -25048.77 | 6.71  |           |       | -24952.61 | 15.81  | -24903.20 | 21.70 |           |       |
| -25143.99 | -1.46 | -25094.80 | 4.21 | -25048.75 | 6.73  |           |       | -24954.33 | 14.09  | -24901.69 | 23.20 |           |       |
| -25144.13 | -1.60 | -25096.21 | 2.80 | -25048.15 | 7.33  |           |       | -24955.38 | 13.04  | -24906.70 | 18.19 |           |       |
| -25143.63 | -1.10 | -25096.27 | 2.73 | -25049.32 | 6.15  |           |       | -24952.15 | 16.28  |           |       |           |       |
| -25142.47 | 0.07  | -25094.20 | 4.80 |           |       |           |       |           |        |           |       |           |       |
| -25144.08 | -1.55 | -25095.04 | 3.97 |           |       |           |       |           |        |           |       |           |       |
| -25143.60 | -1.07 | -25096.46 | 2.55 |           |       |           |       |           |        |           |       |           |       |

Average energies -25143.59 -1.06 -25094.80 4.20 -25047.08 8.40 -24998.71 13.24 -24950.62 17.80 -24902.68 22.22 -24880.44 22.68

## U

|                                     | ground state energy | solid solution energy |           |       |           |       |           |       |           |       |           |       |           |       |
|-------------------------------------|---------------------|-----------------------|-----------|-------|-----------|-------|-----------|-------|-----------|-------|-----------|-------|-----------|-------|
| concentration in solid solution (%) | 3                   | 6                     | 9         | 12    | 15        | 18    | 21        |       |           |       |           |       |           |       |
| number of atoms                     | 2                   | 4                     | 6         | 8     | 10        | 12    | 13        |       |           |       |           |       |           |       |
|                                     | -25148.21           | -0.66                 | -25107.62 | 1.42  | -25064.06 | 6.48  | -25021.62 | 10.40 | -24977.94 | 15.58 | -24937.78 | 17.22 | -24911.71 | 24.04 |
|                                     | -25139.66           | 7.89                  | -25106.66 | 2.38  | -25064.04 | 6.49  | -25020.84 | 11.19 | -24977.43 | 16.08 | -24936.69 | 18.32 | -24915.49 | 20.26 |
|                                     | -25147.57           | -0.02                 | -25095.10 | 13.95 | -25060.52 | 10.01 | -25023.13 | 8.89  | -24978.46 | 15.06 | -24931.99 | 23.02 | -24906.65 | 29.10 |
|                                     | -25139.46           | 8.10                  | -25105.01 | 4.04  | -25063.61 | 6.92  | -25016.72 | 15.30 | -24977.06 | 16.45 | -24939.38 | 15.62 | -24918.48 | 17.27 |
|                                     | -25148.27           | -0.72                 | -25105.31 | 3.73  | -25062.11 | 8.42  | -25021.81 | 10.22 | -24971.46 | 22.05 | -24936.80 | 18.20 | -24916.88 | 18.87 |
|                                     | -25138.88           | 8.67                  | -25106.73 | 2.31  | -25063.27 | 7.27  | -25021.70 | 10.32 | -24977.81 | 15.70 | -24938.05 | 16.95 | -24915.70 | 20.05 |
|                                     | -25148.69           | -1.14                 | -25106.07 | 2.98  | -25061.32 | 9.21  | -25020.43 | 11.59 | -24978.99 | 14.52 | -24935.67 | 19.34 | -24908.91 | 26.84 |
|                                     | -25148.81           | -1.26                 | -25105.53 | 3.51  | -25061.39 | 9.14  | -25020.76 | 11.27 | -24974.43 | 19.09 | -24934.79 | 20.21 | -24916.01 | 19.74 |
|                                     | -25147.70           | -0.15                 | -25105.06 | 3.98  | -25058.55 | 11.98 | -25019.47 | 12.55 | -24978.80 | 14.71 | -24935.98 | 19.03 | -24915.54 | 20.21 |
|                                     | -25147.15           | 0.40                  | -25106.04 | 3.00  | -25059.25 | 11.28 | -25023.30 | 8.72  | -24980.94 | 12.57 | -24935.56 | 19.44 | -24916.08 | 19.67 |
|                                     | -25147.15           | 0.40                  | -25105.87 | 3.17  | -25059.08 | 11.45 | -25021.90 | 10.13 | -24979.60 | 13.92 | -24938.71 | 16.29 | -24914.40 | 21.35 |
|                                     | -25146.33           | 1.22                  | -25106.18 | 2.87  | -25061.02 | 9.51  | -25020.36 | 11.66 | -24977.29 | 16.22 | -24934.10 | 20.90 | -24916.18 | 19.57 |

|           |       |           |        |           |       |           |       |           |       |           |        |           |       |
|-----------|-------|-----------|--------|-----------|-------|-----------|-------|-----------|-------|-----------|--------|-----------|-------|
| -25140.20 | 7.35  | -25107.55 | 1.49   | -25064.65 | 5.88  | -25020.52 | 11.50 | -24976.82 | 16.69 | -24937.42 | 17.58  | -24912.11 | 23.64 |
| -25148.64 | -1.09 | -25103.46 | 5.58   | -25064.88 | 5.65  | -25014.85 | 17.17 | -24976.72 | 16.79 | -24938.44 | 16.56  | -24910.47 | 25.28 |
| -25148.17 | -0.62 | -25104.52 | 4.52   | -25064.51 | 6.02  | -25016.78 | 15.25 | -24978.20 | 15.31 | -24937.03 | 17.98  | -24915.96 | 19.79 |
| -25147.14 | 0.41  | -25105.51 | 3.54   | -25059.66 | 10.87 | -25007.63 | 24.39 | -24979.49 | 14.02 | -24932.49 | 22.51  | -24913.46 | 22.29 |
| -25147.77 | -0.21 | -25097.77 | 11.27  | -25062.65 | 7.88  | -25017.67 | 14.35 | -24980.85 | 12.67 | -24933.69 | 21.31  | -24912.05 | 23.70 |
| -25148.16 | -0.61 | -25103.95 | 5.09   | -25061.85 | 8.68  | -25020.11 | 11.91 | -24977.70 | 15.82 | -24937.19 | 17.81  | -24910.60 | 25.15 |
| -25149.09 | -1.54 | -25107.83 | 1.21   | -25061.95 | 8.58  | -25020.18 | 11.84 | -24977.84 | 15.68 | -24934.27 | 20.73  | -24918.83 | 16.92 |
| -25139.66 | 7.89  | -25105.05 | 4.00   | -25064.53 | 6.00  | -25023.39 | 8.63  | -24978.61 | 14.91 | -24936.34 | 18.67  | -24915.72 | 20.03 |
| -25148.06 | -0.50 | -25105.10 | 3.95   | -25064.62 | 5.91  | -25018.33 | 13.69 | -24975.98 | 17.54 | -24934.96 | 20.04  | -24913.83 | 21.92 |
| -25148.02 | -0.46 | -25105.28 | 3.77   | -25062.68 | 7.85  | -25019.19 | 12.84 | -24972.46 | 21.06 | -24936.93 | 18.08  | -24909.79 | 25.96 |
| -25145.67 | 1.88  | -25104.42 | 4.62   | -25061.41 | 9.13  | -25021.11 | 10.92 | -24979.26 | 14.25 | -24935.26 | 19.74  | -24916.56 | 19.19 |
| -25146.15 | 1.40  | -25106.24 | 2.80   | -25058.07 | 12.47 | -25020.38 | 11.65 | -24976.40 | 17.11 | -24933.85 | 21.16  | -24912.33 | 23.42 |
| -25145.88 | 1.68  | -25104.79 | 4.26   | -25063.92 | 6.61  | -25020.80 | 11.23 | -24980.07 | 13.44 | -24938.25 | 16.75  | -24917.55 | 18.20 |
| -25148.95 | -1.40 | -25105.82 | 3.22   | -25065.18 | 5.35  | -25019.11 | 12.91 | -24975.51 | 18.01 | -24931.49 | 23.51  | -24911.40 | 24.35 |
| -25148.23 | -0.68 | -25105.78 | 3.26   | -25063.50 | 7.03  | -25018.00 | 14.02 | -24976.82 | 16.69 | -24935.98 | 19.02  | -24913.01 | 22.74 |
| -25148.18 | -0.63 | -25104.54 | 4.50   | -25061.59 | 8.95  | -25022.89 | 9.13  | -24973.80 | 19.71 | -24992.54 | -37.54 | -24914.60 | 21.15 |
| -25147.08 | 0.47  | -25105.82 | 3.23   | -25065.33 | 5.20  | -25021.40 | 10.62 | -24980.52 | 12.99 | -24935.61 | 19.39  | -24906.98 | 28.77 |
| -25147.28 | 0.27  | -25106.58 | 2.46   | -25062.81 | 7.72  | -25021.72 | 10.30 | -24976.69 | 16.83 | -24934.19 | 20.81  | -24910.89 | 24.86 |
| -25147.39 | 0.16  | -25104.56 | 4.49   | -25061.76 | 8.77  | -25020.12 | 11.91 | -24979.18 | 14.34 | -24930.88 | 24.12  | -24915.48 | 20.27 |
| -25148.10 | -0.55 | -25104.64 | 4.41   | -25063.47 | 7.06  | -25020.06 | 11.97 | -24976.48 | 17.03 | -24934.33 | 20.68  | -24912.52 | 23.23 |
| -25146.73 | 0.83  | -25105.83 | 3.21   | -25058.93 | 11.60 | -25021.26 | 10.77 | -24977.08 | 16.43 | -24931.24 | 23.76  | -24913.43 | 22.32 |
| -25148.64 | -1.09 | -25105.50 | 3.55   | -25061.63 | 8.90  | -25017.38 | 14.65 | -24975.60 | 17.91 | -24927.79 | 27.21  | -24917.09 | 18.66 |
| -25148.55 | -0.99 | -25103.27 | 5.77   | -25063.62 | 6.91  | -25021.38 | 10.64 | -24979.42 | 14.10 | -24939.80 | 15.21  | -24913.50 | 22.25 |
| -25146.88 | 0.68  | -25101.06 | 7.98   | -25060.24 | 10.29 | -25016.61 | 15.41 | -24970.61 | 22.90 | -24936.39 | 18.62  | -24915.43 | 20.32 |
| -25147.86 | -0.31 | -25104.00 | 5.04   | -25064.03 | 6.51  | -25023.10 | 8.93  | -24975.61 | 17.91 | -24931.74 | 23.27  | -24910.80 | 24.95 |
| -25147.96 | -0.40 | -25107.42 | 1.63   | -25060.87 | 9.67  | -25011.45 | 20.58 | -24976.27 | 17.25 | -24932.89 | 22.12  | -24911.49 | 24.26 |
| -25147.78 | -0.23 | -25104.10 | 4.94   | -25063.76 | 6.77  | -25018.85 | 13.17 | -24972.81 | 20.70 | -24931.31 | 23.70  | -24915.25 | 20.50 |
| -25148.87 | -1.32 | -25102.63 | 6.41   | -25065.07 | 5.46  | -25021.02 | 11.00 | -24980.43 | 13.08 | -24933.54 | 21.46  | -24912.78 | 22.97 |
| -25147.46 | 0.09  | -25101.77 | 7.27   | -25065.75 | 4.78  | -25018.09 | 13.93 | -24978.62 | 14.89 | -24935.81 | 19.19  | -24913.20 | 22.55 |
| -25147.72 | -0.17 | -25106.67 | 2.37   | -25063.12 | 7.41  | -25020.99 | 11.03 | -24980.22 | 13.30 | -24934.54 | 20.46  | -24914.81 | 20.94 |
| -25144.95 | 2.60  | -25106.03 | 3.02   | -25061.83 | 8.71  | -25014.45 | 17.58 | -24974.54 | 18.97 | -24930.27 | 24.74  | -24915.71 | 20.04 |
| -25145.42 | 2.13  | -25104.07 | 4.98   | -25061.58 | 8.96  | -25021.55 | 10.48 | -24980.65 | 12.87 | -24933.74 | 21.26  | -24913.19 | 22.56 |
| -25147.58 | -0.03 | -25124.42 | -15.37 | -25061.32 | 9.22  | -25020.50 | 11.52 | -24978.32 | 15.20 | -24937.25 | 17.75  | -24912.08 | 23.67 |
| -25148.12 | -0.56 | -25102.25 | 6.79   | -25063.70 | 6.84  | -25017.61 | 14.41 | -24977.91 | 15.60 | -24935.92 | 19.08  | -24914.88 | 20.87 |
| -25148.94 | -1.39 | -25104.45 | 4.60   | -25050.04 | 20.50 | -25020.76 | 11.26 | -24978.98 | 14.53 | -24935.23 | 19.78  | -24913.73 | 22.02 |
| -25149.49 | -1.94 | -25103.65 | 5.39   | -25060.40 | 10.14 | -25022.95 | 9.07  | -24979.80 | 13.72 | -24938.02 | 16.99  | -24910.65 | 25.09 |
| -25147.16 | 0.40  | -25105.08 | 3.96   | -25060.73 | 9.81  | -25021.47 | 10.55 | -24977.70 | 15.82 | -24933.76 | 21.24  | -24914.46 | 21.29 |
| -25148.10 | -0.55 | -25102.77 | 6.27   | -25061.51 | 9.02  | -25019.63 | 12.40 | -24979.65 | 13.86 | -24934.73 | 20.27  | -24916.74 | 19.01 |
| -25146.75 | 0.80  | -25105.46 | 3.58   | -25059.07 | 11.47 | -25018.17 | 13.85 | -24974.31 | 19.20 | -24937.52 | 17.48  | -24906.30 | 29.45 |
| -25139.68 | 7.88  | -25103.95 | 5.09   | -25063.66 | 6.87  | -25018.97 | 13.05 | -24980.07 | 13.45 | -24935.49 | 19.52  | -24915.38 | 20.37 |
| -25147.50 | 0.06  | -25104.48 | 4.56   | -25063.15 | 7.39  | -25022.84 | 9.18  | -24971.39 | 22.12 | -24936.34 | 18.66  | -24916.47 | 19.28 |



|           |       |           |       |           |      |           |       |           |       |           |       |           |       |
|-----------|-------|-----------|-------|-----------|------|-----------|-------|-----------|-------|-----------|-------|-----------|-------|
| -25148.37 | -0.81 | -25106.56 | 2.49  | -25063.33 | 7.20 | -25020.42 | 11.61 | -24975.58 | 17.93 | -24935.77 | 19.24 | -24912.88 | 22.87 |
| -25147.95 | -0.40 | -25106.13 | 2.92  | -25064.11 | 6.42 | -25021.43 | 10.59 | -24971.91 | 21.61 | -24938.54 | 16.47 | -24915.81 | 19.94 |
| -25147.44 | 0.11  | -25105.86 | 3.19  | -25062.63 | 7.90 | -25011.47 | 20.55 | -24975.12 | 18.39 | -24937.69 | 17.31 | -24915.08 | 20.67 |
| -25147.95 | -0.39 | -25106.56 | 2.48  | -25065.61 | 4.92 | -25020.56 | 11.46 | -24977.40 | 16.12 | -24936.54 | 18.46 | -24915.23 | 20.52 |
| -25148.28 | -0.73 | -25105.43 | 3.61  | -25063.99 | 6.54 | -25018.67 | 13.36 | -24981.11 | 12.40 | -24937.98 | 17.02 | -24914.22 | 21.53 |
| -25147.44 | 0.11  | -25106.54 | 2.50  | -25061.68 | 8.85 | -25020.53 | 11.49 | -24972.51 | 21.00 | -24934.44 | 20.57 | -24915.47 | 20.28 |
| -25147.40 | 0.15  | -25104.49 | 4.55  | -25062.66 | 7.87 | -25018.45 | 13.58 | -24981.43 | 12.09 | -24931.24 | 23.76 | -24914.60 | 21.15 |
| -25148.94 | -1.39 | -25104.45 | 4.59  | -25061.30 | 9.23 | -25021.86 | 10.16 | -24975.98 | 17.54 | -24933.26 | 21.74 | -24909.27 | 26.48 |
| -25147.20 | 0.35  | -25101.72 | 7.32  | -25063.64 | 6.89 | -25021.22 | 10.80 | -24976.16 | 17.36 | -24935.82 | 19.18 | -24916.50 | 19.25 |
| -25148.59 | -1.04 | -25096.68 | 12.36 | -25062.64 | 7.90 | -25021.37 | 10.65 | -24977.13 | 16.38 | -24930.34 | 24.67 | -24911.38 | 24.37 |
| -25148.98 | -1.43 | -25106.22 | 2.82  | -25062.70 | 7.83 | -25017.68 | 14.35 | -24978.45 | 15.06 | -24936.72 | 18.28 | -24915.50 | 20.25 |
| -25147.98 | -0.43 | -25107.23 | 1.81  |           |      | -25023.17 | 8.85  | -24974.88 | 18.63 |           |       | -24913.08 | 22.67 |
| -25148.50 | -0.94 | -25105.92 | 3.13  |           |      | -25019.33 | 12.70 | -24980.13 | 13.39 |           |       |           |       |
| -25148.02 | -0.47 | -25103.30 | 5.74  |           |      | -25019.17 |       |           |       |           |       |           |       |
| -25148.42 | -0.87 | -25105.41 | 3.63  |           |      | -25020.90 |       |           |       |           |       |           |       |
| -25147.13 | 0.42  | -25105.26 | 3.78  |           |      | -25020.25 |       |           |       |           |       |           |       |
| -25147.45 | 0.10  | -25105.96 | 3.08  |           |      |           |       |           |       |           |       |           |       |
| -25148.37 | -0.82 | -25105.78 | 3.26  |           |      |           |       |           |       |           |       |           |       |
| -25147.60 | -0.04 | -25106.99 | 2.05  |           |      |           |       |           |       |           |       |           |       |
| -25148.67 | -1.11 | -25105.36 | 3.68  |           |      |           |       |           |       |           |       |           |       |
| -25147.81 | -0.26 | -25105.00 | 4.04  |           |      |           |       |           |       |           |       |           |       |
| -25148.01 | -0.46 | -25104.79 | 4.25  |           |      |           |       |           |       |           |       |           |       |
| -25149.78 | -2.23 | -25106.55 | 2.50  |           |      |           |       |           |       |           |       |           |       |
| -25147.67 | -0.12 | -25105.71 | 3.33  |           |      |           |       |           |       |           |       |           |       |
| -25147.31 | 0.24  |           |       |           |      |           |       |           |       |           |       |           |       |
| -25148.80 | -1.25 |           |       |           |      |           |       |           |       |           |       |           |       |
| -25148.62 | -1.07 |           |       |           |      |           |       |           |       |           |       |           |       |
| -25147.77 | -0.21 |           |       |           |      |           |       |           |       |           |       |           |       |
| -25148.78 | -1.22 |           |       |           |      |           |       |           |       |           |       |           |       |
| -25147.70 | -0.15 |           |       |           |      |           |       |           |       |           |       |           |       |
| -25149.45 | -1.90 |           |       |           |      |           |       |           |       |           |       |           |       |
| -25147.02 | 0.54  |           |       |           |      |           |       |           |       |           |       |           |       |
| -25139.13 | 8.42  |           |       |           |      |           |       |           |       |           |       |           |       |

Average energies    -25147.17    0.39 -25105.11    3.94 -25062.27    8.26 -25019.74    12.29 -24977.23    16.28 -24936.07    18.94 -24913.73    22.02

# Ca<sub>1-x</sub>M<sub>x</sub>ZrTi<sub>2-2x</sub>Fe<sub>2x</sub>O<sub>7</sub> M=(Ce, Pu, Th, U)

## Ti(2)Ti(3)

N.B. All stated energies are in eV

| Ce                                  | ground | solid     |       |           |       |           |       |           |       |           |       |           |       |
|-------------------------------------|--------|-----------|-------|-----------|-------|-----------|-------|-----------|-------|-----------|-------|-----------|-------|
|                                     | state  | solution  |       |           |       |           |       |           |       |           |       |           |       |
|                                     | energy | energy    |       |           |       |           |       |           |       |           |       |           |       |
| concentration in solid solution (%) | 3      | 6         | 9     |           | 12    |           | 15    |           | 18    |           | 21    |           |       |
| number of atoms                     | 2      | 4         | 6     |           | 8     |           | 10    |           | 12    |           | 13    |           |       |
| -25114.07                           | 28.81  | -25067.46 | 32.26 | -25022.15 | 34.39 | -24978.69 | 34.68 | -24935.24 | 34.95 | -24896.32 | 30.71 | -24870.43 | 35.00 |
| -25115.01                           | 27.88  | -25070.51 | 29.20 | -25025.10 | 31.44 | -24978.70 | 34.67 | -24937.10 | 33.10 | -24893.54 | 33.48 | -24867.69 | 37.74 |
| -25114.22                           | 28.67  | -25069.38 | 30.34 | -25026.94 | 29.60 | -24980.45 | 32.92 | -24938.41 | 31.78 | -24890.07 | 36.95 | -24873.77 | 31.67 |
| -25114.33                           | 28.55  | -25068.78 | 30.94 | -25024.69 | 31.85 | -24982.02 | 31.35 | -24931.21 | 38.99 | -24891.43 | 35.59 | -24865.50 | 39.93 |
| -25114.19                           | 28.69  | -25070.22 | 29.50 | -25025.18 | 31.36 | -24982.95 | 30.42 | -24938.47 | 31.72 | -24893.01 | 34.01 | -24868.45 | 36.99 |
| -25114.48                           | 28.40  | -25070.00 | 29.71 | -25026.43 | 30.12 | -24974.65 | 38.72 | -24932.34 | 37.86 | -24891.64 | 35.38 | -24868.26 | 37.17 |
| -25113.75                           | 29.14  | -25068.96 | 30.76 | -25023.39 | 33.15 | -24982.40 | 30.97 | -24935.34 | 34.86 | -24892.60 | 34.42 | -24865.38 | 40.05 |
| -25112.24                           | 30.65  | -25070.74 | 28.98 | -25024.00 | 32.54 | -24979.63 | 33.74 | -24936.92 | 33.27 | -24891.45 | 35.57 | -24871.28 | 34.16 |
| -25113.49                           | 29.39  | -25069.33 | 30.39 | -25026.38 | 30.17 | -24978.30 | 35.07 | -24940.46 | 29.73 | -24893.23 | 33.79 | -24872.03 | 33.40 |
| -25113.58                           | 29.31  | -25069.81 | 29.90 | -25026.59 | 29.95 | -24978.67 | 34.70 | -24934.78 | 35.41 | -24888.42 | 38.60 | -24871.30 | 34.14 |
| -25112.35                           | 30.54  | -25071.41 | 28.30 | -25024.72 | 31.83 | -24978.07 | 35.30 | -24933.36 | 36.84 | -24893.29 | 33.73 | -24871.95 | 33.48 |
| -25113.45                           | 29.44  | -25069.30 | 30.42 | -25026.31 | 30.23 | -24981.72 | 31.65 | -24935.53 | 34.67 | -24892.16 | 34.87 | -24873.83 | 31.60 |
| -25112.36                           | 30.53  | -25070.64 | 29.08 | -25022.68 | 33.86 | -24982.83 | 30.54 | -24935.29 | 34.91 | -24892.06 | 34.97 | -24871.30 | 34.13 |
| -25114.87                           | 28.02  | -25070.15 | 29.56 | -25025.58 | 30.97 | -24984.23 | 29.14 | -24936.24 | 33.95 | -24895.86 | 31.16 | -24871.36 | 34.08 |
| -25113.51                           | 29.37  | -25069.85 | 29.86 | -25023.34 | 33.20 | -24981.33 | 32.04 | -24939.00 | 31.19 | -24888.53 | 38.49 | -24865.62 | 39.81 |
| -25114.93                           | 27.96  | -25070.28 | 29.43 | -25025.55 | 30.99 | -24977.67 | 35.70 | -24937.39 | 32.80 | -24892.27 | 34.75 | -24870.77 | 34.66 |
| -25114.86                           | 28.03  | -25067.12 | 32.59 | -25024.25 | 32.30 | -24980.75 | 32.62 | -24933.91 | 36.29 | -24888.67 | 38.35 | -24874.64 | 30.80 |
| -25115.61                           | 27.28  | -25068.22 | 31.49 | -25024.08 | 32.46 | -24980.68 | 32.68 | -24936.30 | 33.90 | -24892.90 | 34.12 | -24867.73 | 37.71 |
| -25113.92                           | 28.97  | -25071.12 | 28.59 | -25025.27 | 31.28 | -24980.11 | 33.26 | -24930.74 | 39.46 | -24895.75 | 31.27 | -24872.45 | 32.99 |
| -25113.38                           | 29.51  | -25070.74 | 28.98 | -25024.35 | 32.20 | -24981.89 | 31.48 | -24937.99 | 32.20 | -24891.63 | 35.39 | -24868.16 | 37.28 |
| -25114.49                           | 28.40  | -25071.74 | 27.97 | -25024.89 | 31.65 | -24978.45 | 34.92 | -24935.01 | 35.19 | -24888.62 | 38.40 | -24868.02 | 37.42 |
| -25113.98                           | 28.91  | -25068.54 | 31.18 | -25024.70 | 31.84 | -24981.63 | 31.74 | -24937.74 | 32.46 | -24893.21 | 33.82 | -24865.28 | 40.15 |
| -25115.25                           | 27.64  | -25068.64 | 31.08 | -25002.15 | 54.40 | -24978.66 | 34.71 | -24935.05 | 35.15 | -24889.10 | 37.92 | -24874.66 | 30.78 |
| -25113.73                           | 29.16  | -25071.15 | 28.56 | -25023.18 | 33.36 | -24978.95 | 34.42 | -24936.13 | 34.07 | -24894.58 | 32.45 | -24871.22 | 34.22 |
| -25114.59                           | 28.30  | -25070.27 | 29.45 | -25023.87 | 32.67 | -24981.57 | 31.80 | -24934.99 | 35.20 | -24888.78 | 38.24 | -24870.69 | 34.74 |
| -25113.15                           | 29.74  | -25068.42 | 31.29 | -25021.55 | 35.00 | -24974.44 | 38.93 | -24937.60 | 32.59 | -24894.06 | 32.96 | -24864.40 | 41.04 |
| -25113.88                           | 29.01  | -25070.90 | 28.81 | -25024.97 | 31.57 | -24980.74 | 32.63 | -24929.35 | 40.85 | -24894.89 | 32.14 | -24871.08 | 34.35 |
| -25110.74                           | 32.15  | -25069.19 | 30.53 | -25026.51 | 30.03 | -24981.79 | 31.58 | -24935.59 | 34.60 | -24893.25 | 33.77 | -24872.00 | 33.43 |
| -25112.53                           | 30.36  | -25067.49 | 32.23 | -25026.26 | 30.28 | -24982.14 | 31.23 | -24935.21 | 34.98 | -24892.10 | 34.92 | -24871.86 | 33.58 |

|           |                 |                 |                 |                 |                 |                 |       |
|-----------|-----------------|-----------------|-----------------|-----------------|-----------------|-----------------|-------|
| -25114.55 | 28.34 -25068.50 | 31.21 -25024.54 | 32.01 -24980.01 | 33.36 -24932.79 | 37.41 -24894.48 | 32.55 -24868.39 | 37.05 |
| -25114.84 | 28.05 -25070.59 | 29.12 -25025.45 | 31.09 -24982.46 | 30.91 -24936.58 | 33.61 -24890.03 | 36.99 -24867.91 | 37.53 |
| -25114.05 | 28.84 -25068.39 | 31.33 -25022.88 | 33.67 -24979.70 | 33.67 -24936.82 | 33.37 -24892.67 | 34.35 -24865.30 | 40.13 |
| -25114.35 | 28.53 -25069.09 | 30.62 -25025.15 | 31.40 -24979.55 | 33.82 -24936.04 | 34.16 -24890.92 | 36.10 -24871.12 | 34.31 |
| -25113.65 | 29.23 -25069.10 | 30.61 -25023.93 | 32.61 -24982.31 | 31.06 -24930.48 | 39.72 -24895.35 | 31.67 -24870.64 | 34.79 |
| -25113.43 | 29.46 -25068.25 | 31.46 -25025.22 | 31.32 -24977.18 | 36.19 -24935.30 | 34.89 -24892.22 | 34.80 -24866.10 | 39.34 |
| -25114.91 | 27.98 -25052.45 | 47.27 -25025.13 | 31.42 -24980.00 | 33.37 -24932.21 | 37.99 -24890.22 | 36.81 -24873.20 | 32.24 |
| -25114.32 | 28.56 -25070.13 | 29.59 -25020.38 | 36.16 -24980.67 | 32.70 -24937.43 | 32.77 -24894.10 | 32.92 -24870.07 | 35.37 |
| -25114.71 | 28.18 -25067.57 | 32.15 -25025.86 | 30.68 -24977.61 | 35.75 -24938.32 | 31.87 -24894.96 | 32.07 -24871.25 | 34.19 |
| -25113.80 | 29.09 -25065.73 | 33.98 -25023.72 | 32.82 -24979.81 | 33.56 -24940.81 | 29.39 -24889.31 | 37.72 -24865.59 | 39.84 |
| -25114.69 | 28.19 -25068.64 | 31.08 -25025.78 | 30.76 -24980.12 | 33.25 -24936.84 | 33.35 -24892.12 | 34.90 -24870.31 | 35.12 |
| -25115.56 | 27.33 -25071.40 | 28.32 -25022.51 | 34.03 -24974.77 | 38.60 -24934.91 | 35.29 -24896.54 | 30.48 -24870.48 | 34.95 |
| -25110.46 | 32.43 -25071.42 | 28.29 -25024.28 | 32.26 -24984.22 | 29.15 -24936.38 | 33.82 -24894.49 | 32.54 -24870.18 | 35.26 |
| -25114.66 | 28.23 -25070.98 | 28.73 -25023.72 | 32.82 -24982.46 | 30.90 -24939.99 | 30.20 -24892.99 | 34.03 -24873.98 | 31.46 |
| -25114.60 | 28.29 -25072.06 | 27.66 -25027.11 | 29.43 -24983.58 | 29.79 -24938.20 | 32.00 -24886.74 | 40.28 -24865.41 | 40.03 |
| -25114.05 | 28.83 -25068.03 | 31.69 -25026.96 | 29.58 -24981.90 | 31.47 -24891.97 | 78.22 -24889.33 | 37.69 -24868.96 | 36.47 |
| -25113.52 | 29.37 -25070.74 | 28.97 -25024.38 | 32.17 -24977.92 | 35.45 -24930.84 | 39.35 -24891.72 | 35.31 -24870.04 | 35.40 |
| -25113.35 | 29.54 -25069.69 | 30.03 -25022.83 | 33.71 -24981.21 | 32.16 -24937.19 | 33.00 -24896.61 | 30.41 -24871.59 | 33.85 |
| -25113.37 | 29.52 -25068.85 | 30.87 -25027.41 | 29.13 -24977.28 | 36.09 -24939.19 | 31.00 -24892.35 | 34.67 -24874.57 | 30.86 |
| -25114.18 | 28.71 -25070.33 | 29.38 -25025.53 | 31.02 -24980.34 | 33.03 -24935.33 | 34.87 -24886.72 | 40.30 -24864.15 | 41.28 |
| -25114.33 | 28.56 -25067.29 | 32.43 -25026.89 | 29.65 -24980.30 | 33.07 -24931.91 | 38.29 -24893.67 | 33.35 -24864.38 | 41.06 |
| -25116.05 | 26.84 -25070.02 | 29.69 -25026.63 | 29.91 -24983.50 | 29.86 -24937.61 | 32.58 -24890.99 | 36.04 -24870.65 | 34.78 |
| -25115.04 | 27.85 -25070.66 | 29.06 -25021.82 | 34.72 -24980.50 | 32.86 -24937.88 | 32.32 -24897.56 | 29.46 -24870.43 | 35.00 |
| -25114.41 | 28.48 -25069.09 | 30.63 -25026.48 | 30.06 -24980.64 | 32.73 -24936.14 | 34.05 -24890.97 | 36.05 -24869.24 | 36.20 |
| -25115.33 | 27.56 -25068.81 | 30.90 -25025.87 | 30.67 -24983.96 | 29.41 -24937.94 | 32.26 -24894.33 | 32.69 -24872.78 | 32.66 |
| -25113.82 | 29.07 -25068.99 | 30.73 -25020.93 | 35.61 -24982.56 | 30.81 -24936.70 | 33.49 -24892.00 | 35.02 -24872.82 | 32.61 |
| -25111.46 | 31.43 -25070.72 | 29.00 -25023.42 | 33.12 -24983.72 | 29.65 -24940.05 | 30.15 -24893.53 | 33.49 -24870.87 | 34.57 |
| -25115.13 | 27.76 -25070.94 | 28.77 -25024.44 | 32.10 -24979.05 | 34.31 -24935.57 | 34.63 -24891.05 | 35.97 -24869.06 | 36.38 |
| -25112.68 | 30.21 -25070.38 | 29.33 -25023.94 | 32.60 -24976.04 | 37.33 -24935.32 | 34.88 -24895.03 | 32.00 -24872.78 | 32.65 |
| -25114.18 | 28.71 -25069.37 | 30.34 -25024.86 | 31.69 -24979.32 | 34.05 -24937.22 | 32.97 -24886.73 | 40.29 -24867.95 | 37.49 |
| -25114.49 | 28.40 -25070.25 | 29.46 -25025.74 | 30.80 -24982.23 | 31.14 -24936.55 | 33.64 -24893.73 | 33.29 -24870.59 | 34.85 |
| -25112.57 | 30.32 -25070.70 | 29.02 -25027.66 | 28.88 -24981.20 | 32.17 -24934.66 | 35.54 -24895.72 | 31.30 -24870.43 | 35.01 |
| -25111.51 | 31.37 -25069.44 | 30.28 -25022.78 | 33.77 -24973.23 | 40.14 -24934.29 | 35.90 -24889.71 | 37.31 -24862.66 | 42.77 |
| -25113.52 | 29.37 -25063.98 | 35.73 -25027.67 | 28.87 -24980.81 | 32.56 -24935.97 | 34.22 -24892.96 | 34.07 -24865.82 | 39.61 |
| -25114.04 | 28.85 -25065.47 | 34.24 -25026.62 | 29.92 -24978.66 | 34.71 -24936.64 | 33.56 -24894.91 | 32.12 -24872.24 | 33.20 |
| -25112.11 | 30.78 -25069.33 | 30.39 -25024.89 | 31.65 -24981.74 | 31.63 -24936.43 | 33.76 -24890.38 | 36.64 -24867.86 | 37.57 |
| -25113.05 | 29.84 -25068.63 | 31.08 -25021.72 | 34.82 -24980.78 | 32.59 -24936.72 | 33.48 -24892.13 | 34.89 -24873.22 | 32.21 |
| -25116.13 | 26.76 -25069.00 | 30.71 -25027.03 | 29.52 -24981.52 | 31.85 -24939.22 | 30.97 -24893.97 | 33.06 -24870.96 | 34.48 |
| -25113.06 | 29.83 -25068.10 | 31.61 -25025.08 | 31.46 -24981.68 | 31.69 -24935.72 | 34.48 -24891.78 | 35.24 -24866.58 | 38.86 |
| -25115.28 | 27.61 -25071.58 | 28.13 -25023.19 | 33.35 -24981.12 | 32.25 -24936.08 | 34.11 -24889.56 | 37.46 -24869.66 | 35.77 |
| -25114.31 | 28.58 -25070.65 | 29.06 -25028.61 | 27.94 -24973.58 | 39.79 -24933.85 | 36.34 -24889.23 | 37.79 -24872.81 | 32.63 |

|           |                 |                 |                 |                 |                 |                 |       |
|-----------|-----------------|-----------------|-----------------|-----------------|-----------------|-----------------|-------|
| -25114.16 | 28.73 -25071.56 | 28.15 -25024.01 | 32.53 -24981.38 | 31.99 -24940.70 | 29.50 -24885.96 | 41.06 -24873.66 | 31.77 |
| -25113.35 | 29.54 -25066.98 | 32.74 -25025.01 | 31.54 -24982.48 | 30.89 -24940.16 | 30.03 -24896.32 | 30.70 -24873.70 | 31.74 |
| -25113.93 | 28.96 -25069.48 | 30.23 -25023.86 | 32.69 -24975.97 | 37.40 -24935.32 | 34.88 -24890.76 | 36.26 -24865.72 | 39.72 |
| -25114.61 | 28.28 -25068.96 | 30.76 -25026.94 | 29.60 -24981.83 | 31.54 -24934.68 | 35.51 -24895.74 | 31.28 -24865.95 | 39.49 |
| -25113.01 | 29.88 -25071.74 | 27.98 -25027.21 | 29.33 -24977.42 | 35.94 -24936.95 | 33.24 -24896.89 | 30.13 -24871.38 | 34.06 |
| -25115.44 | 27.45 -25069.94 | 29.77 -25023.33 | 33.21 -24982.36 | 31.01 -24936.32 | 33.88 -24889.68 | 37.34 -24871.34 | 34.10 |
| -25114.50 | 28.39 -25070.99 | 28.72 -25024.58 | 31.96 -24981.19 | 32.17 -24937.74 | 32.46 -24895.38 | 31.64 -24871.42 | 34.01 |
| -25112.74 | 30.15 -25067.17 | 32.55 -25026.23 | 30.31 -24981.46 | 31.91 -24936.41 | 33.79 -24891.78 | 35.25 -24873.59 | 31.84 |
| -25112.54 | 30.35 -25071.18 | 28.54 -25027.31 | 29.23 -24979.26 | 34.11 -24936.48 | 33.72 -24886.50 | 40.52 -24866.68 | 38.76 |
| -25105.11 | 37.78 -25070.67 | 29.05 -25023.06 | 33.48 -24981.75 | 31.62 -24937.61 | 32.58 -24893.66 | 33.36 -24867.09 | 38.35 |
| -25114.32 | 28.57 -25070.28 | 29.44 -25021.48 | 35.06 -24980.69 | 32.68 -24939.86 | 30.33 -24895.54 | 31.48 -24868.67 | 36.77 |
| -25114.59 | 28.30 -25070.32 | 29.39 -25023.57 | 32.97 -24976.98 | 36.39 -24934.72 | 35.48 -24893.67 | 33.35 -24870.08 | 35.36 |
| -25114.63 | 28.26 -25067.82 | 31.89 -25023.91 | 32.63 -24984.32 | 29.05 -24937.41 | 32.78 -24894.32 | 32.71 -24870.58 | 34.86 |
| -25114.93 | 27.96 -25069.07 | 30.64 -25021.10 | 35.45 -24982.15 | 31.22 -24936.83 | 33.36 -24891.76 | 35.27 -24871.18 | 34.26 |
| -25114.41 | 28.48 -25067.85 | 31.87 -25022.94 | 33.60 -24981.19 | 32.18 -24936.61 | 33.58 -24894.59 | 32.43 -24868.84 | 36.60 |
| -25112.87 | 30.02 -25068.25 | 31.46 -25024.77 | 31.77 -24980.70 | 32.67 -24936.22 | 33.98 -24890.43 | 36.60 -24870.89 | 34.54 |
| -25115.31 | 27.57 -25068.01 | 31.71 -25026.75 | 29.79 -24981.33 | 32.04 -24939.23 | 30.96 -24893.85 | 33.18 -24866.80 | 38.63 |
| -25113.91 | 28.98 -25069.96 | 29.76 -25024.39 | 32.15 -24980.71 | 32.66 -24934.65 | 35.54 -24893.95 | 33.08 -24871.46 | 33.98 |
| -25115.28 | 27.61 -25069.88 | 29.83 -25023.52 | 33.02 -24978.94 | 34.43 -24938.64 | 31.55 -24891.91 | 35.11 -24869.65 | 35.78 |
| -25114.33 | 28.55 -25069.76 | 29.95 -25026.50 | 30.04 -24980.05 | 33.32 -24938.58 | 31.61 -24892.72 | 34.30 -24866.02 | 39.41 |
| -25114.50 | 28.39 -25069.02 | 30.69 -25025.36 | 31.18 -24984.74 | 28.63 -24938.65 | 31.54 -24891.14 | 35.88 -24874.03 | 31.41 |
| -25115.27 | 27.62 -25070.06 | 29.66 -25024.55 | 31.99 -24979.06 | 34.31 -24926.58 | 43.62 -24893.26 | 33.76 -24868.48 | 36.96 |
| -25114.24 | 28.64 -25072.03 | 27.69 -25014.92 | 41.62 -24981.31 | 32.06 -24936.42 | 33.77 -24890.48 | 36.55 -24875.51 | 29.92 |
| -25114.06 | 28.82 -25070.33 | 29.39 -25025.28 | 31.26 -24978.59 | 34.78 -24935.18 | 35.02 -24892.76 | 34.26 -24866.69 | 38.74 |
| -25114.32 | 28.57 -25069.86 | 29.86 -25024.55 | 32.00 -24974.00 | 39.37 -24937.33 | 32.87 -24891.30 | 35.72 -24864.73 | 40.71 |
| -25113.87 | 29.02 -25068.34 | 31.38 -25025.89 | 30.65 -24982.73 | 30.64 -24936.27 | 33.93 -24896.73 | 30.29 -24867.30 | 38.14 |
| -25114.23 | 28.66 -25070.57 | 29.15 -25027.13 | 29.41 -24981.47 | 31.90 -24935.13 | 35.06 -24891.31 | 35.72 -24869.99 | 35.45 |
| -25113.65 | 29.24 -25070.76 | 28.95 -25027.43 | 29.11 -24982.87 | 30.50 -24936.68 | 33.52 -24894.15 | 32.87 -24867.28 | 38.15 |
| -25114.86 | 28.02 -25069.89 | 29.82 -25026.39 | 30.15 -24975.72 | 37.65 -24937.67 | 32.52 -24895.19 | 31.83 -24869.01 | 36.43 |
| -25114.63 | 28.25 -25069.69 | 30.03 -25027.06 | 29.48 -24973.01 | 40.35 -24941.66 | 28.54 -24885.93 | 41.10 -24870.11 | 35.32 |
| -25112.64 | 30.25 -25069.15 | 30.57 -25022.92 | 33.62 -24982.56 | 30.81 -24936.26 | 33.93 -24893.50 | 33.52 -24870.94 | 34.50 |
| -25114.66 | 28.23 -25070.96 | 28.76 -25024.56 | 31.98 -24978.54 | 34.83 -24936.76 | 33.43 -24891.05 | 35.98 -24875.25 | 30.19 |
| -25114.59 | 28.30 -25071.24 | 28.47 -25026.71 | 29.84 -24979.06 | 34.31 -24934.96 | 35.24 -24889.14 | 37.88 -24869.09 | 36.35 |
| -25111.11 | 31.78 -25070.79 | 28.93 -25024.27 | 32.28 -24974.16 | 39.21 -24935.56 | 34.64 -24890.26 | 36.76 -24871.47 | 33.96 |
| -25114.83 | 28.06 -25070.24 | 29.48 -25019.84 | 36.70 -24982.22 | 31.15 -24936.58 | 33.61 -24893.08 | 33.94 -24871.79 | 33.65 |
| -25114.88 | 28.01 -25071.16 | 28.55 -25026.60 | 29.94 -24981.10 | 32.27 -24937.00 | 33.20 -24897.64 | 29.38 -24872.63 | 32.81 |
| -25115.38 | 27.51 -25069.44 | 30.28 -25025.61 | 30.93 -24978.08 | 35.29 -24935.52 | 34.68 -24887.98 | 39.05 -24866.78 | 38.65 |
| -25113.85 | 29.04 -25070.08 | 29.63 -25023.58 | 32.96 -24981.14 | 32.23 -24935.06 | 35.13 -24892.11 | 34.92 -24870.72 | 34.72 |
| -25112.29 | 30.60 -25070.64 | 29.08 -25026.40 | 30.14 -24982.98 | 30.39 -24933.69 | 36.51 -24894.11 | 32.92 -24861.80 | 43.64 |
| -25114.27 | 28.62 -25068.74 | 30.98 -25024.61 | 31.94 -24979.31 | 34.06 -24931.94 | 38.26 -24897.70 | 29.33 -24869.01 | 36.42 |
| -25113.74 | 29.15 -25070.12 | 29.59 -25027.38 | 29.16 -24979.66 | 33.71 -24934.98 | 35.22 -24893.08 | 33.94 -24871.05 | 34.39 |

|           |       |           |       |           |       |           |       |           |       |           |       |           |       |
|-----------|-------|-----------|-------|-----------|-------|-----------|-------|-----------|-------|-----------|-------|-----------|-------|
| -25114.43 | 28.46 | -25068.68 | 31.03 | -25024.28 | 32.26 | -24980.75 | 32.62 | -24931.67 | 38.53 | -24888.08 | 38.94 | -24866.24 | 39.19 |
| -25115.04 | 27.85 | -25069.24 | 30.47 | -25025.32 | 31.22 | -24984.56 | 28.81 | -24939.78 | 30.42 | -24897.76 | 29.26 | -24863.87 | 41.57 |
| -25112.61 | 30.28 | -25068.56 | 31.15 | -25026.55 | 29.99 | -24981.20 | 32.17 | -24934.89 | 35.31 | -24883.43 | 43.59 | -24871.54 | 33.90 |
| -25114.31 | 28.58 | -25068.31 | 31.41 | -25024.72 | 31.82 | -24983.52 | 29.85 | -24937.21 | 32.99 | -24888.39 | 38.64 | -24872.94 | 32.49 |
| -25114.15 | 28.74 | -25067.71 | 32.00 | -25023.82 | 32.73 | -24981.78 | 31.59 | -24935.83 | 34.36 | -24891.71 | 35.32 | -24870.16 | 35.28 |
| -25113.09 | 29.80 | -25068.42 | 31.30 | -25026.09 | 30.45 | -24981.51 | 31.86 | -24934.07 | 36.13 | -24893.26 | 33.77 | -24872.20 | 33.23 |
| -25114.78 | 28.10 | -25070.21 | 29.51 | -25027.73 | 28.81 |           |       | -24937.13 | 33.06 |           |       | -24870.90 | 34.53 |
| -25112.62 | 30.26 | -25070.05 | 29.66 | -25024.62 | 31.93 |           |       |           |       |           |       |           |       |

Average energies

|           |       |           |       |           |       |           |       |           |       |           |       |           |       |
|-----------|-------|-----------|-------|-----------|-------|-----------|-------|-----------|-------|-----------|-------|-----------|-------|
| -25113.91 | 28.98 | -25069.41 | 30.30 | -25024.61 | 31.93 | -24980.27 | 33.10 | -24935.75 | 34.45 | -24892.28 | 34.74 | -24869.75 | 35.69 |
|-----------|-------|-----------|-------|-----------|-------|-----------|-------|-----------|-------|-----------|-------|-----------|-------|

ground state energy  
solid solution energy

**Pu**

concentration in solid solution (%)  
number of atoms

|           | 3     | 6         | 9     | 12        | 15    | 18        | 21    |           |       |           |       |           |       |
|-----------|-------|-----------|-------|-----------|-------|-----------|-------|-----------|-------|-----------|-------|-----------|-------|
|           | 2     | 4         | 6     | 8         | 10    | 12        | 13    |           |       |           |       |           |       |
| -25108.43 | 28.47 | -25057.65 | 30.10 | -25009.03 | 29.56 | -24957.04 | 32.39 | -24907.16 | 33.10 | -24856.95 | 34.16 | -24832.48 | 34.05 |
| -25107.43 | 29.48 | -25057.51 | 30.23 | -25010.01 | 28.58 | -24959.91 | 29.51 | -24905.17 | 35.10 | -24853.86 | 37.25 | -24821.65 | 44.88 |
| -25107.43 | 29.47 | -25058.77 | 28.97 | -25003.52 | 35.06 | -24956.04 | 33.39 | -24908.99 | 31.28 | -24859.18 | 31.93 | -24833.95 | 32.58 |
| -25109.24 | 27.66 | -25059.35 | 28.39 | -25007.38 | 31.21 | -24960.38 | 29.04 | -24908.80 | 31.47 | -24862.67 | 28.44 | -24833.48 | 33.05 |
| -25108.46 | 28.44 | -25056.65 | 31.10 | -25009.01 | 29.57 | -24955.68 | 33.75 | -24904.38 | 35.89 | -24854.00 | 37.11 | -24833.45 | 33.08 |
| -25108.35 | 28.55 | -25057.90 | 29.85 | -25004.99 | 33.59 | -24947.86 | 41.57 | -24908.61 | 31.66 | -24859.57 | 31.54 | -24827.52 | 39.01 |
| -25109.08 | 27.82 | -25057.15 | 30.60 | -25004.48 | 34.10 | -24954.38 | 35.04 | -24904.23 | 36.04 | -24856.24 | 34.87 | -24832.91 | 33.62 |
| -25109.21 | 27.69 | -25056.91 | 30.83 | -25007.85 | 30.73 | -24954.49 | 34.94 | -24910.66 | 29.60 | -24850.96 | 40.15 | -24832.12 | 34.41 |
| -25108.87 | 28.03 | -25057.08 | 30.67 | -25006.89 | 31.70 | -24957.17 | 32.26 | -24909.49 | 30.78 | -24857.22 | 33.89 | -24835.17 | 31.36 |
| -25108.89 | 28.01 | -25057.51 | 30.23 | -25008.19 | 30.40 | -24956.92 | 32.50 | -24908.85 | 31.42 | -24849.03 | 42.08 | -24835.94 | 30.59 |
| -25109.66 | 27.25 | -25057.10 | 30.65 | -25006.37 | 32.21 | -24955.94 | 33.48 | -24910.31 | 29.96 | -24852.67 | 38.44 | -24835.08 | 31.45 |
| -25108.94 | 27.96 | -25057.39 | 30.35 | -25005.78 | 32.81 | -24957.81 | 31.62 | -24906.51 | 33.76 | -24853.40 | 37.71 | -24830.82 | 35.71 |
| -25103.28 | 33.63 | -25056.23 | 31.52 | -25007.96 | 30.63 | -24955.80 | 33.63 | -24905.48 | 34.79 | -24861.40 | 29.71 | -24832.92 | 33.61 |
| -25108.29 | 28.61 | -25057.61 | 30.13 | -25004.89 | 33.70 | -24948.13 | 41.30 | -24907.29 | 32.98 | -24856.23 | 34.88 | -24828.92 | 37.61 |
| -25108.91 | 27.99 | -25057.75 | 30.00 | -25006.04 | 32.55 | -24959.27 | 30.15 | -24906.16 | 34.10 | -24855.40 | 35.71 | -24830.12 | 36.41 |
| -25107.23 | 29.68 | -25058.85 | 28.90 | -25008.15 | 30.43 | -24960.03 | 29.40 | -24907.25 | 33.02 | -24855.49 | 35.62 | -24832.13 | 34.40 |
| -25109.67 | 27.24 | -25056.52 | 31.22 | -25009.81 | 28.78 | -24956.36 | 33.07 | -24907.19 | 33.08 | -24860.65 | 30.46 | -24831.70 | 34.83 |
| -25108.44 | 28.46 | -25055.99 | 31.75 | -25007.27 | 31.32 | -24957.53 | 31.90 | -24906.08 | 34.19 | -24853.28 | 37.83 | -24830.73 | 35.80 |
| -25108.96 | 27.95 | -25057.74 | 30.00 | -25004.20 | 34.38 | -24954.41 | 35.02 | -24906.39 | 33.88 | -24858.24 | 32.87 | -24832.28 | 34.25 |
| -25108.24 | 28.66 | -25057.18 | 30.57 | -25007.74 | 30.84 | -24955.82 | 33.60 | -24909.39 | 30.87 | -24859.49 | 31.62 | -24829.23 | 37.30 |
| -25107.46 | 29.45 | -25058.68 | 29.07 | -25007.49 | 31.10 | -24957.65 | 31.78 | -24906.30 | 33.96 | -24861.71 | 29.40 | -24826.61 | 39.92 |
| -25109.19 | 27.71 | -25054.77 | 32.97 | -25008.28 | 30.30 | -24957.99 | 31.44 | -24907.32 | 32.95 | -24859.40 | 31.71 | -24834.76 | 31.77 |
| -25108.54 | 28.36 | -25058.41 | 29.33 | -25008.06 | 30.52 | -24957.28 | 32.15 | -24907.21 | 33.06 | -24861.70 | 29.41 | -24832.06 | 34.47 |
| -25108.25 | 28.65 | -25059.02 | 28.73 | -25009.83 | 28.76 | -24958.34 | 31.09 | -24906.38 | 33.88 | -24853.72 | 37.39 | -24833.07 | 33.46 |

|           |                 |                 |                 |                 |                 |                 |       |
|-----------|-----------------|-----------------|-----------------|-----------------|-----------------|-----------------|-------|
| -25108.76 | 28.15 -25057.65 | 30.10 -25007.72 | 30.87 -24959.02 | 30.41 -24907.89 | 32.38 -24858.23 | 32.88 -24830.83 | 35.70 |
| -25107.99 | 28.91 -25057.95 | 29.80 -25008.48 | 30.11 -24957.92 | 31.50 -24908.71 | 31.55 -24854.02 | 37.09 -24836.09 | 30.44 |
| -25108.48 | 28.43 -25057.50 | 30.24 -25007.01 | 31.57 -24958.81 | 30.62 -24910.05 | 30.22 -24857.04 | 34.06 -24830.87 | 35.66 |
| -25109.61 | 27.29 -25055.71 | 32.03 -25006.04 | 32.55 -24957.54 | 31.89 -24909.85 | 30.42 -24856.12 | 34.99 -24834.54 | 31.99 |
| -25108.29 | 28.62 -25059.03 | 28.72 -25004.49 | 34.10 -24951.97 | 37.45 -24906.78 | 33.49 -24855.62 | 35.49 -24836.00 | 30.53 |
| -25107.13 | 29.78 -25057.60 | 30.15 -25008.59 | 29.99 -24955.55 | 33.88 -24905.64 | 34.62 -24855.06 | 36.05 -24836.42 | 30.12 |
| -25106.95 | 29.96 -25058.97 | 28.78 -25005.71 | 32.87 -24956.63 | 32.79 -24908.44 | 31.83 -24855.22 | 35.89 -24829.76 | 36.77 |
| -25108.70 | 28.20 -25057.76 | 29.99 -25007.94 | 30.64 -24954.38 | 35.05 -24908.69 | 31.58 -24855.46 | 35.65 -24831.80 | 34.73 |
| -25100.21 | 36.70 -25058.93 | 28.81 -25009.71 | 28.87 -24960.42 | 29.01 -24905.51 | 34.75 -24858.63 | 32.48 -24835.79 | 30.74 |
| -25107.77 | 29.13 -25057.74 | 30.00 -25006.80 | 31.79 -24959.00 | 30.43 -24909.40 | 30.87 -24859.40 | 31.71 -24829.82 | 36.71 |
| -25108.67 | 28.23 -25057.71 | 30.03 -25005.39 | 33.20 -24955.50 | 33.92 -24907.25 | 33.02 -24859.52 | 31.59 -24825.34 | 41.19 |
| -25108.69 | 28.22 -25057.92 | 29.83 -25008.03 | 30.55 -24952.18 | 37.25 -24906.68 | 33.59 -24855.47 | 35.64 -24831.95 | 34.58 |
| -25109.11 | 27.79 -25056.52 | 31.23 -25007.03 | 31.55 -24956.24 | 33.18 -24908.73 | 31.53 -24859.06 | 32.05 -24831.04 | 35.49 |
| -25107.64 | 29.27 -25056.42 | 31.32 -25006.42 | 32.16 -24957.65 | 31.78 -24908.33 | 31.94 -24856.83 | 34.28 -24834.48 | 32.06 |
| -25107.98 | 28.93 -25056.53 | 31.21 -25006.26 | 32.33 -24958.79 | 30.64 -24910.05 | 30.22 -24856.50 | 34.61 -24831.48 | 35.05 |
| -25109.53 | 27.37 -25058.45 | 29.30 -25009.19 | 29.40 -24952.13 | 37.30 -24903.33 | 36.94 -24857.87 | 33.24 -24828.79 | 37.74 |
| -25107.56 | 29.34 -25058.03 | 29.72 -25009.15 | 29.44 -24953.57 | 35.86 -24906.25 | 34.02 -24857.79 | 33.32 -24831.87 | 34.66 |
| -25109.21 | 27.69 -25058.56 | 29.18 -25006.61 | 31.98 -24958.40 | 31.03 -24908.36 | 31.91 -24853.65 | 37.46 -24829.93 | 36.60 |
| -25107.07 | 29.83 -25056.39 | 31.36 -25006.42 | 32.17 -24955.54 | 33.89 -24909.44 | 30.83 -24856.90 | 34.21 -24836.77 | 29.76 |
| -25108.18 | 28.72 -25058.36 | 29.39 -25006.80 | 31.79 -24954.66 | 34.77 -24906.67 | 33.60 -24854.82 | 36.29 -24832.51 | 34.02 |
| -25108.66 | 28.24 -25056.90 | 30.84 -25008.87 | 29.72 -24952.77 | 36.66 -24909.41 | 30.85 -24850.01 | 41.10 -24827.67 | 38.86 |
| -25107.85 | 29.05 -25060.07 | 27.67 -25008.30 | 30.29 -24958.14 | 31.28 -24907.43 | 32.83 -24857.17 | 33.94 -24831.59 | 34.94 |
| -25107.77 | 29.13 -25059.10 | 28.65 -25005.82 | 32.77 -24957.87 | 31.56 -24906.47 | 33.79 -24857.49 | 33.62 -24833.08 | 33.45 |
| -25109.86 | 27.05 -25054.86 | 32.89 -25007.12 | 31.46 -24955.88 | 33.55 -24909.60 | 30.66 -24855.64 | 35.47 -24828.27 | 38.26 |
| -25109.43 | 27.48 -25056.43 | 31.32 -25008.76 | 29.83 -24956.60 | 32.82 -24907.48 | 32.79 -24857.99 | 33.12 -24835.69 | 30.84 |
| -25108.32 | 28.58 -25055.14 | 32.60 -25007.08 | 31.51 -24960.64 | 28.79 -24903.50 | 36.77 -24860.22 | 30.89 -24834.26 | 32.27 |
| -25108.15 | 28.75 -25057.04 | 30.70 -25004.34 | 34.24 -24957.95 | 31.48 -24910.26 | 30.00 -24857.10 | 34.01 -24830.86 | 35.67 |
| -25108.25 | 28.66 -25059.81 | 27.93 -25003.12 | 35.47 -24958.17 | 31.25 -24908.10 | 32.16 -24856.72 | 34.39 -24829.56 | 36.97 |
| -25109.39 | 27.51 -25055.48 | 32.27 -25006.73 | 31.86 -24954.71 | 34.72 -24907.95 | 32.31 -24852.00 | 39.11 -24834.83 | 31.70 |
| -25106.67 | 30.24 -25055.15 | 32.59 -25007.17 | 31.42 -24956.96 | 32.46 -24909.80 | 30.47 -24857.11 | 34.00 -24834.65 | 31.88 |
| -25107.84 | 29.06 -25058.26 | 29.49 -25009.26 | 29.32 -24948.54 | 40.89 -24908.01 | 32.26 -24854.42 | 36.69 -24833.84 | 32.69 |
| -25108.68 | 28.23 -25057.67 | 30.08 -25008.30 | 30.29 -24959.36 | 30.07 -24906.60 | 33.67 -24852.34 | 38.77 -24833.70 | 32.83 |
| -25108.58 | 28.32 -25056.84 | 30.91 -25012.00 | 26.58 -24958.63 | 30.79 -24907.03 | 33.24 -24858.97 | 32.14 -24831.14 | 35.39 |
| -25108.50 | 28.41 -25057.45 | 30.29 -25008.98 | 29.61 -24956.09 | 33.33 -24907.90 | 32.37 -24856.01 | 35.10 -24826.34 | 40.19 |
| -25108.66 | 28.25 -25056.50 | 31.24 -25006.63 | 31.95 -24958.11 | 31.32 -24908.45 | 31.82 -24857.08 | 34.03 -24833.22 | 33.31 |
| -25109.32 | 27.58 -25056.80 | 30.94 -25010.97 | 27.62 -24956.83 | 32.60 -24907.59 | 32.68 -24856.75 | 34.36 -24833.55 | 32.98 |
| -25109.20 | 27.71 -25057.18 | 30.57 -25009.58 | 29.01 -24955.56 | 33.87 -24910.07 | 30.20 -24856.19 | 34.92 -24832.35 | 34.18 |
| -25108.49 | 28.41 -25059.26 | 28.49 -25007.02 | 31.57 -24959.18 | 30.24 -24902.69 | 37.58 -24857.56 | 33.55 -24830.12 | 36.41 |
| -25107.72 | 29.18 -25054.07 | 33.67 -25008.06 | 30.53 -24958.71 | 30.71 -24910.56 | 29.71 -24856.79 | 34.32 -24833.07 | 33.46 |
| -25108.91 | 28.00 -25058.41 | 29.33 -25008.95 | 29.63 -24952.62 | 36.81 -24906.12 | 34.15 -24859.14 | 31.97 -24832.55 | 33.98 |
| -25109.32 | 27.58 -25058.13 | 29.62 -25007.01 | 31.58 -24955.14 | 34.29 -24909.98 | 30.29 -24860.00 | 31.11 -24832.40 | 34.13 |

|           |                 |                 |                 |                 |                 |                 |       |
|-----------|-----------------|-----------------|-----------------|-----------------|-----------------|-----------------|-------|
| -25108.99 | 27.91 -25058.91 | 28.83 -25007.09 | 31.50 -24957.58 | 31.85 -24910.55 | 29.71 -24855.70 | 35.41 -24831.43 | 35.10 |
| -25108.69 | 28.21 -25056.68 | 31.06 -25006.06 | 32.53 -24958.23 | 31.19 -24910.13 | 30.14 -24859.52 | 31.59 -24834.40 | 32.13 |
| -25108.96 | 27.94 -25060.07 | 27.68 -25007.68 | 30.90 -24958.57 | 30.86 -24909.10 | 31.16 -24854.32 | 36.79 -24831.29 | 35.24 |
| -25108.94 | 27.96 -25058.56 | 29.18 -25007.19 | 31.39 -24958.01 | 31.42 -24907.49 | 32.78 -24858.70 | 32.41 -24830.96 | 35.57 |
| -25106.04 | 30.86 -25059.41 | 28.34 -25003.53 | 35.06 -24958.11 | 31.32 -24904.92 | 35.35 -24852.55 | 38.56 -24831.66 | 34.87 |
| -25108.01 | 28.89 -25058.88 | 28.87 -25009.17 | 29.41 -24956.99 | 32.43 -24908.88 | 31.38 -24858.36 | 32.75 -24827.91 | 38.62 |
| -25108.26 | 28.64 -25056.48 | 31.27 -25008.14 | 30.45 -24958.09 | 31.33 -24904.77 | 35.50 -24859.76 | 31.35 -24831.86 | 34.67 |
| -25107.10 | 29.80 -25058.66 | 29.09 -25004.85 | 33.74 -24954.75 | 34.68 -24903.79 | 36.48 -24858.96 | 32.14 -24832.96 | 33.57 |
| -25109.20 | 27.70 -25056.39 | 31.35 -25004.82 | 33.77 -24959.71 | 29.72 -24907.26 | 33.01 -24855.77 | 35.34 -24833.00 | 33.53 |
| -25108.54 | 28.36 -25058.37 | 29.38 -25006.81 | 31.78 -24951.61 | 37.82 -24899.57 | 40.70 -24857.07 | 34.04 -24829.89 | 36.64 |
| -25109.02 | 27.89 -25057.15 | 30.59 -25009.62 | 28.97 -24958.99 | 30.43 -24906.71 | 33.56 -24852.83 | 38.28 -24832.68 | 33.85 |
| -25108.75 | 28.15 -25058.41 | 29.33 -25007.54 | 31.05 -24956.25 | 33.18 -24906.03 | 34.24 -24855.80 | 35.31 -24833.15 | 33.38 |
| -25108.61 | 28.30 -25057.70 | 30.05 -25010.33 | 28.26 -24957.36 | 32.06 -24910.18 | 30.08 -24855.49 | 35.62 -24830.35 | 36.18 |
| -25109.71 | 27.19 -25058.97 | 28.77 -25008.21 | 30.38 -24953.23 | 36.20 -24910.17 | 30.10 -24856.67 | 34.44 -24835.66 | 30.87 |
| -25107.79 | 29.11 -25059.76 | 27.98 -25006.59 | 31.99 -24958.00 | 31.43 -24909.20 | 31.07 -24857.54 | 33.57 -24838.46 | 28.07 |
| -25108.82 | 28.08 -25057.27 | 30.48 -25009.87 | 28.71 -24961.60 | 27.83 -24904.79 | 35.48 -24858.84 | 32.26 -24832.37 | 34.16 |
| -25110.39 | 26.51 -25059.20 | 28.54 -25007.20 | 31.38 -24957.82 | 31.60 -24903.69 | 36.58 -24853.56 | 37.55 -24834.40 | 32.13 |
| -25107.85 | 29.05 -25057.74 | 30.00 -25008.36 | 30.22 -24961.40 | 28.02 -24904.09 | 36.18 -24857.54 | 33.57 -24833.65 | 32.88 |
| -25108.85 | 28.05 -25059.09 | 28.66 -25008.30 | 30.29 -24957.14 | 32.29 -24908.39 | 31.88 -24860.20 | 30.91 -24829.16 | 37.37 |
| -25108.64 | 28.26 -25057.69 | 30.05 -25008.99 | 29.60 -24956.37 | 33.06 -24910.74 | 29.53 -24861.44 | 29.67 -24832.45 | 34.08 |
| -25108.31 | 28.59 -25057.71 | 30.03 -25007.21 | 31.38 -24956.38 | 33.05 -24910.09 | 30.18 -24857.69 | 33.42 -24827.62 | 38.91 |
| -25108.64 | 28.26 -25057.14 | 30.60 -25005.85 | 32.73 -24957.76 | 31.67 -24907.60 | 32.67 -24857.73 | 33.38 -24833.62 | 32.91 |
| -25108.98 | 27.93 -25054.80 | 32.95 -25006.42 | 32.17 -24952.77 | 36.65 -24905.95 | 34.32 -24857.91 | 33.20 -24832.11 | 34.42 |
| -25109.60 | 27.30 -25056.63 | 31.11 -25007.76 | 30.83 -24957.57 | 31.86 -24904.08 | 36.19 -24857.89 | 33.22 -24831.40 | 35.13 |
| -25108.59 | 28.31 -25059.00 | 28.75 -25008.16 | 30.42 -24960.36 | 29.07 -24908.88 | 31.39 -24860.06 | 31.05 -24835.23 | 31.30 |
| -25107.36 | 29.55 -25059.09 | 28.65 -25007.50 | 31.09 -24955.61 | 33.82 -24909.16 | 31.11 -24854.81 | 36.30 -24832.72 | 33.81 |
| -25108.30 | 28.60 -25058.90 | 28.85 -25007.48 | 31.10 -24956.14 | 33.29 -24903.91 | 36.36 -24851.51 | 39.60 -24832.48 | 34.05 |
| -25108.58 | 28.32 -25058.57 | 29.18 -25006.86 | 31.73 -24957.57 | 31.86 -24910.64 | 29.62 -24859.76 | 31.35 -24832.82 | 33.71 |
| -25109.08 | 27.82 -25057.29 | 30.46 -25007.37 | 31.21 -24954.53 | 34.90 -24906.47 | 33.80 -24860.36 | 30.75 -24834.36 | 32.17 |
| -25107.97 | 28.93 -25058.18 | 29.57 -25009.18 | 29.41 -24955.89 | 33.53 -24907.77 | 32.50 -24857.59 | 33.52 -24826.16 | 40.37 |
| -25108.63 | 28.28 -25055.58 | 32.16 -25008.59 | 30.00 -24958.58 | 30.85 -24908.88 | 31.39 -24859.37 | 31.74 -24833.06 | 33.47 |
| -25110.03 | 26.87 -25058.36 | 29.39 -25007.79 | 30.79 -24957.70 | 31.73 -24907.74 | 32.53 -24860.57 | 30.54 -24833.53 | 33.01 |
| -25106.95 | 29.96 -25058.99 | 28.75 -25008.15 | 30.44 -24950.97 | 38.46 -24908.62 | 31.64 -24854.33 | 36.78 -24833.77 | 32.76 |
| -25106.45 | 30.46 -25058.79 | 28.96 -25007.07 | 31.51 -24955.47 | 33.96 -24908.98 | 31.29 -24858.44 | 32.67 -24833.11 | 33.42 |
| -25107.24 | 29.66 -25059.30 | 28.44 -25010.37 | 28.21 -24948.01 | 41.41 -24904.86 | 35.41 -24859.04 | 32.07 -24830.08 | 36.45 |
| -25109.20 | 27.71 -25056.44 | 31.31 -25008.66 | 29.93 -24957.60 | 31.83 -24909.83 | 30.44 -24852.50 | 38.61 -24834.18 | 32.35 |
| -25107.00 | 29.91 -25058.52 | 29.22 -25004.77 | 33.81 -24957.39 | 32.04 -24907.96 | 32.31 -24858.30 | 32.81 -24836.69 | 29.84 |
| -25108.03 | 28.87 -25059.92 | 27.83 -25000.77 | 37.81 -24959.30 | 30.12 -24910.40 | 29.87 -24860.45 | 30.65 -24833.38 | 33.15 |
| -25109.04 | 27.86 -25057.90 | 29.84 -25010.02 | 28.57 -24957.59 | 31.84 -24911.11 | 29.16 -24854.43 | 36.68 -24830.29 | 36.24 |
| -25108.71 | 28.19 -25058.86 | 28.89 -25009.09 | 29.50 -24955.40 | 34.03 -24907.84 | 32.43 -24858.27 | 32.84 -24831.64 | 34.89 |
| -25108.70 | 28.20 -25057.72 | 30.02 -25008.30 | 30.28 -24956.42 | 33.01 -24905.78 | 34.49 -24857.54 | 33.57 -24832.10 | 34.43 |

|           |       |           |       |           |       |           |       |           |       |           |       |           |       |
|-----------|-------|-----------|-------|-----------|-------|-----------|-------|-----------|-------|-----------|-------|-----------|-------|
| -25109.17 | 27.73 | -25056.09 | 31.65 | -25009.42 | 29.16 | -24958.89 | 30.53 | -24907.20 | 33.07 | -24854.59 | 36.52 | -24833.07 | 33.46 |
| -25108.21 | 28.69 | -25059.17 | 28.57 | -25009.52 | 29.07 | -24959.41 | 30.01 | -24907.20 | 33.07 | -24859.20 | 31.91 | -24833.86 | 32.67 |
| -25108.46 | 28.44 | -25055.62 | 32.12 | -25009.74 | 28.85 | -24956.54 | 32.88 | -24908.19 | 32.08 | -24859.30 | 31.81 | -24830.92 | 35.61 |
| -25108.48 | 28.42 | -25057.57 | 30.18 | -25008.10 | 30.48 | -24958.41 | 31.02 | -24909.34 | 30.92 | -24857.54 | 33.57 | -24836.33 | 30.20 |
| -25108.60 | 28.30 | -25059.38 | 28.36 | -25006.07 | 32.52 | -24959.87 | 29.56 | -24907.52 | 32.75 | -24856.35 | 34.76 | -24831.90 | 34.64 |
| -25107.79 | 29.11 | -25054.73 | 33.01 | -25005.70 | 32.89 | -24958.99 | 30.44 | -24905.45 | 34.82 | -24857.66 | 33.45 | -24830.96 | 35.57 |
| -25109.25 | 27.65 | -25056.79 | 30.95 | -25010.03 | 28.56 | -24958.96 | 30.47 | -24908.18 | 32.09 | -24857.02 | 34.09 | -24834.83 | 31.70 |
| -25108.12 | 28.78 | -25056.12 | 31.62 | -25006.82 | 31.76 | -24959.34 | 30.09 | -24906.03 | 34.24 | -24859.63 | 31.47 | -24837.16 | 29.37 |
| -25106.59 | 30.32 | -25058.47 | 29.27 | -25008.57 | 30.01 | -24952.98 | 36.44 | -24908.49 | 31.78 | -24833.61 | 57.50 | -24833.82 | 32.71 |
| -25107.83 | 29.08 | -25058.60 | 29.14 | -25003.77 | 34.82 | -24952.40 | 37.03 | -24906.32 | 33.95 | -24861.86 | 29.25 | -24830.31 | 36.22 |
| -25108.13 | 28.77 | -25057.31 | 30.44 | -25000.75 | 37.84 | -24958.30 | 31.12 | -24909.87 | 30.40 | -24854.98 | 36.13 | -24834.05 | 32.48 |
| -25109.65 | 27.26 | -25054.60 | 33.15 | -25005.73 | 32.86 | -24954.89 | 34.54 | -24910.35 | 29.92 |           |       | -24833.58 | 32.95 |
|           |       |           |       | -25009.21 | 29.37 | -24958.10 | 31.33 | -24908.44 | 31.83 |           |       | -24830.23 | 36.30 |
|           |       |           |       | -25008.47 | 30.12 |           |       |           |       |           |       |           |       |

Average energies -25108.34 28.56 -25057.64 30.10 -25007.42 31.16 -24956.66 32.77 -24907.62 32.65 -24856.78 34.33 -24832.24 34.29

ground state energy solid solution energy

# Th

concentration in solid solution (%)  
number of atoms

|           | 3     | 6         | 9     | 12        | 15    | 18        | 21    |           |       |           |       |           |       |
|-----------|-------|-----------|-------|-----------|-------|-----------|-------|-----------|-------|-----------|-------|-----------|-------|
|           | 2     | 4         | 6     | 8         | 10    | 12        | 13    |           |       |           |       |           |       |
| -25114.70 | 27.83 | -25068.33 | 30.67 | -25022.36 | 33.12 | -24978.62 | 33.33 | -24932.03 | 36.39 | -24890.36 | 34.54 | -24864.49 | 38.63 |
| -25115.11 | 27.42 | -25069.48 | 29.52 | -25024.95 | 30.53 | -24979.98 | 31.97 | -24931.81 | 36.61 | -24888.76 | 36.13 | -24868.49 | 34.64 |
| -25114.32 | 28.22 | -25070.36 | 28.65 | -25026.35 | 29.12 | -24971.25 | 40.70 | -24936.76 | 31.66 | -24891.12 | 33.77 | -24866.34 | 36.78 |
| -25113.42 | 29.11 | -25068.86 | 30.15 | -25026.03 | 29.45 | -24975.46 | 36.49 | -24931.20 | 37.22 | -24893.10 | 31.79 | -24868.45 | 34.68 |
| -25113.77 | 28.76 | -25067.83 | 31.18 | -25023.37 | 32.11 | -24979.98 | 31.97 | -24930.26 | 38.16 | -24891.75 | 33.14 | -24864.71 | 38.42 |
| -25113.65 | 28.89 | -25069.24 | 29.76 | -25021.85 | 33.63 | -24977.77 | 34.18 | -24931.99 | 36.43 | -24884.44 | 40.45 | -24865.80 | 37.33 |
| -25113.61 | 28.92 | -25069.53 | 29.47 | -25020.83 | 34.65 | -24982.54 | 29.41 | -24935.16 | 33.26 | -24889.29 | 35.60 | -24871.41 | 31.72 |
| -25113.30 | 29.23 | -25068.71 | 30.29 | -25024.64 | 30.84 | -24982.77 | 29.18 | -24927.31 | 41.11 | -24891.53 | 33.36 | -24868.67 | 34.45 |
| -25113.79 | 28.74 | -25066.50 | 32.51 | -25022.07 | 33.41 | -24972.44 | 39.51 | -24937.68 | 30.74 | -24892.80 | 32.09 | -24869.17 | 33.96 |
| -25113.49 | 29.04 | -25070.21 | 28.80 | -25022.95 | 32.52 | -24977.14 | 34.81 | -24934.32 | 34.10 | -24890.23 | 34.66 | -24860.89 | 42.24 |
| -25113.02 | 29.51 | -25070.73 | 28.27 | -25025.33 | 30.15 | -24980.40 | 31.55 | -24935.52 | 32.90 | -24893.25 | 31.65 | -24864.63 | 38.50 |
| -25112.36 | 30.17 | -25070.31 | 28.70 | -25024.96 | 30.51 | -24965.79 | 46.16 | -24937.01 | 31.41 | -24885.87 | 39.02 | -24866.71 | 36.42 |
| -25113.07 | 29.46 | -25069.43 | 29.58 | -25025.64 | 29.84 | -24977.68 | 34.27 | -24933.79 | 34.63 | -24888.83 | 36.06 | -24862.63 | 40.50 |
| -25114.25 | 28.29 | -25068.06 | 30.95 | -25026.13 | 29.35 | -24975.23 | 36.71 | -24937.41 | 31.01 | -24889.10 | 35.80 | -24860.77 | 42.36 |
| -25115.10 | 27.44 | -25069.56 | 29.45 | -25024.41 | 31.07 | -24982.01 | 29.94 | -24935.76 | 32.66 | -24884.27 | 40.62 | -24874.74 | 28.39 |
| -25114.81 | 27.72 | -25068.22 | 30.79 | -25024.47 | 31.01 | -24979.85 | 32.10 | -24935.51 | 32.91 | -24891.35 | 33.54 | -24865.01 | 38.12 |
| -25113.52 | 29.02 | -25068.58 | 30.42 | -25021.79 | 33.69 | -24975.20 | 36.75 | -24934.17 | 34.25 | -24893.57 | 31.33 | -24867.99 | 35.14 |
| -25114.53 | 28.00 | -25067.21 | 31.79 | -25025.72 | 29.76 | -24974.64 | 37.31 | -24931.71 | 36.71 | -24892.23 | 32.66 | -24868.49 | 34.64 |



|           |                 |                 |                 |                 |                 |                 |       |
|-----------|-----------------|-----------------|-----------------|-----------------|-----------------|-----------------|-------|
| -25113.60 | 28.93 -25065.33 | 33.67 -25024.16 | 31.31 -24978.56 | 33.39 -24930.88 | 37.54 -24889.80 | 35.09 -24868.59 | 34.54 |
| -25113.86 | 28.68 -25069.11 | 29.90 -25024.02 | 31.46 -24981.61 | 30.33 -24931.64 | 36.78 -24891.44 | 33.45 -24864.83 | 38.30 |
| -25112.95 | 29.58 -25069.66 | 29.35 -25027.23 | 28.25 -24976.80 | 35.15 -24934.79 | 33.63 -24894.01 | 30.88 -24867.45 | 35.68 |
| -25113.38 | 29.16 -25069.65 | 29.36 -25023.46 | 32.01 -24978.87 | 33.08 -24933.59 | 34.83 -24885.97 | 38.92 -24871.51 | 31.62 |
| -25113.67 | 28.87 -25066.34 | 32.66 -25025.14 | 30.34 -24969.12 | 42.83 -24935.48 | 32.94 -24882.97 | 41.93 -24865.06 | 38.07 |
| -25114.10 | 28.43 -25066.91 | 32.10 -25023.36 | 32.12 -24979.73 | 32.22 -24933.65 | 34.77 -24891.56 | 33.33 -24868.20 | 34.93 |
| -25113.49 | 29.04 -25068.31 | 30.70 -25024.29 | 31.18 -24978.59 | 33.36 -24932.44 | 35.98 -24888.72 | 36.18 -24868.64 | 34.49 |
| -25113.53 | 29.01 -25068.58 | 30.43 -25018.71 | 36.77 -24976.67 | 35.28 -24936.38 | 32.04 -24894.18 | 30.71 -24864.69 | 38.44 |
| -25114.20 | 28.33 -25070.81 | 28.20 -25025.30 | 30.18 -24979.57 | 32.38 -24937.36 | 31.06 -24890.24 | 34.65 -24868.40 | 34.73 |
| -25114.12 | 28.41 -25065.59 | 33.41 -25023.28 | 32.20 -24978.95 | 33.00 -24936.32 | 32.10 -24887.48 | 37.41 -24866.73 | 36.40 |
| -25114.08 | 28.45 -25068.41 | 30.60 -25021.71 | 33.77 -24980.32 | 31.63 -24935.11 | 33.31 -24892.65 | 32.24 -24855.11 | 48.02 |
| -25114.20 | 28.33 -25068.71 | 30.30 -25026.40 | 29.08 -24980.58 | 31.37 -24933.01 | 35.41 -24890.61 | 34.28 -24859.42 | 43.71 |
| -25114.01 | 28.52 -25068.64 | 30.36 -25025.22 | 30.26 -24980.68 | 31.27 -24935.40 | 33.02 -24894.88 | 30.01 -24868.02 | 35.11 |
| -25115.12 | 27.41 -25070.04 | 28.97 -25021.55 | 33.93 -24980.88 | 31.07 -24928.39 | 40.03 -24892.05 | 32.84 -24872.10 | 31.03 |
| -25114.02 | 28.52 -25070.39 | 28.61 -25020.51 | 34.96 -24980.33 | 31.62 -24930.65 | 37.77 -24887.51 | 37.38 -24868.26 | 34.87 |
| -25115.84 | 26.69 -25067.28 | 31.73 -25022.25 | 33.23 -24972.57 | 39.38 -24936.04 | 32.38 -24890.00 | 34.90 -24868.40 | 34.73 |
| -25112.78 | 29.76 -25065.12 | 33.89 -25025.04 | 30.43 -24979.29 | 32.66 -24931.82 | 36.60 -24890.80 | 34.09 -24855.59 | 47.54 |
| -25115.11 | 27.42 -25069.15 | 29.85 -25022.90 | 32.58 -24981.24 | 30.70 -24937.06 | 31.36 -24884.51 | 40.38 -24868.44 | 34.69 |
| -25112.88 | 29.65 -25068.59 | 30.41 -25020.54 | 34.94 -24977.02 | 34.93 -24933.16 | 35.26 -24878.16 | 46.73 -24869.67 | 33.46 |
| -25113.96 | 28.57 -25068.40 | 30.61 -25026.44 | 29.04 -24982.11 | 29.84 -24906.08 | 62.34 -24890.04 | 34.85 -24866.85 | 36.28 |
| -25113.48 | 29.05 -25069.43 | 29.57 -25025.21 | 30.27 -24980.47 | 31.48 -24932.88 | 35.54 -24891.76 | 33.13 -24861.67 | 41.45 |
| -25113.58 | 28.95 -25069.89 | 29.12 -25021.46 | 34.02 -24976.97 | 34.98 -24931.09 | 37.33 -24891.02 | 33.87 -24861.19 | 41.94 |
| -25113.93 | 28.60 -25070.11 | 28.90 -25024.66 | 30.81 -24982.38 | 29.57 -24930.49 | 37.93 -24883.57 | 41.32 -24867.66 | 35.46 |
| -25113.37 | 29.17 -25069.02 | 29.98 -25024.20 | 31.28 -24979.75 | 32.20 -24935.95 | 32.47 -24889.00 | 35.89 -24861.19 | 41.94 |
| -25113.26 | 29.27 -25069.18 | 29.82 -25023.51 | 31.96 -24978.46 | 33.49 -24938.39 | 30.04 -24889.01 | 35.88 -24865.04 | 38.09 |
| -25115.86 | 26.67 -25069.76 | 29.24 -25021.19 | 34.29 -24981.79 | 30.16 -24934.70 | 33.72 -24889.61 | 35.28 -24867.89 | 35.24 |
| -25114.00 | 28.53 -25067.03 | 31.98 -25023.07 | 32.40 -24978.83 | 33.12 -24935.50 | 32.92 -24889.81 | 35.08 -24868.30 | 34.82 |
| -25113.87 | 28.66 -25069.68 | 29.33 -25024.71 | 30.76 -24976.24 | 35.71 -24933.70 | 34.72 -24893.11 | 31.78 -24868.35 | 34.78 |
| -25114.01 | 28.52 -25066.44 | 32.57 -25020.12 | 35.36 -24979.79 | 32.16 -24934.28 | 34.14 -24884.70 | 40.20 -24861.54 | 41.59 |
| -25114.10 | 28.43 -25070.69 | 28.32 -25022.03 | 33.45 -24979.43 | 32.52 -24939.58 | 28.84 -24888.53 | 36.36 -24867.32 | 35.81 |
| -25114.42 | 28.11 -25068.40 | 30.60 -25021.47 | 34.01 -24975.27 | 36.68 -24938.92 | 29.50 -24889.06 | 35.83 -24872.04 | 31.09 |
| -25113.50 | 29.04 -25071.04 | 27.96 -25023.37 | 32.11 -24981.21 | 30.74 -24928.01 | 40.41 -24881.11 | 43.78 -24864.94 | 38.19 |
| -25114.09 | 28.45 -25069.07 | 29.94 -25024.67 | 30.80 -24978.11 | 33.84 -24928.88 | 39.54 -24882.65 | 42.24 -24870.79 | 32.34 |
| -25113.79 | 28.75 -25068.57 | 30.44 -25023.70 | 31.78 -24979.07 | 32.88 -24929.20 | 39.22 -24882.54 | 42.35 -24868.01 | 35.12 |
| -25115.05 | 27.49 -25068.54 | 30.46 -25024.24 | 31.24 -24978.79 | 33.16 -24931.43 | 36.99 -24884.72 | 40.18 -24867.03 | 36.10 |
| -25114.87 | 27.66 -25070.53 | 28.48 -25025.07 | 30.40 -24977.15 | 34.80 -24929.95 | 38.47 -24889.55 | 35.34 -24866.54 | 36.59 |
| -25115.13 | 27.40 -25067.35 | 31.66 -25024.07 | 31.40 -24977.03 | 34.92 -24937.03 | 31.39 -24879.96 | 44.93 -24866.67 | 36.46 |
| -25110.33 | 32.20 -25069.71 | 29.29 -25020.78 | 34.69 -24977.24 | 34.71 -24933.93 | 34.49 -24887.68 | 37.21 -24859.52 | 43.61 |
| -25113.79 | 28.74 -25070.25 | 28.76 -25024.85 | 30.62 -24981.01 | 30.94 -24936.35 | 32.07 -24885.59 | 39.30 -24870.92 | 32.20 |
| -25113.31 | 29.22 -25068.88 | 30.12 -25025.83 | 29.64 -24977.29 | 34.66 -24932.55 | 35.87 -24891.64 | 33.26 -24867.61 | 35.51 |
| -25113.06 | 29.47 -25069.33 | 29.67 -25023.22 | 32.26 -24979.21 | 32.74 -24933.32 | 35.10 -24885.75 | 39.14 -24869.63 | 33.50 |

|           |                 |                 |                 |                 |                 |                 |       |
|-----------|-----------------|-----------------|-----------------|-----------------|-----------------|-----------------|-------|
| -25114.61 | 27.92 -25068.88 | 30.12 -25025.55 | 29.93 -24976.10 | 35.85 -24938.20 | 30.22 -24888.41 | 36.48 -24863.81 | 39.32 |
| -25114.30 | 28.23 -25067.81 | 31.19 -25023.49 | 31.99 -24978.61 | 33.34 -24937.90 | 30.52 -24891.20 | 33.69 -24866.55 | 36.57 |
| -25114.71 | 27.83 -25069.92 | 29.08 -25020.10 | 35.37 -24977.96 | 33.99 -24929.46 | 38.96 -24887.38 | 37.51 -24867.31 | 35.81 |
| -25114.16 | 28.37 -25069.62 | 29.39 -25023.78 | 31.70 -24982.21 | 29.74 -24935.14 | 33.28 -24887.40 | 37.49 -24867.84 | 35.29 |
| -25113.90 | 28.63 -25066.64 | 32.37 -25024.16 | 31.32 -24978.27 | 33.68 -24917.82 | 50.60 -24889.48 | 35.41 -24872.25 | 30.88 |
| -25113.77 | 28.76 -25070.38 | 28.62 -25022.64 | 32.83 -24969.26 | 42.69 -24934.38 | 34.04 -24893.59 | 31.31 -24867.75 | 35.38 |
| -25115.57 | 26.96 -25069.91 | 29.10 -25020.16 | 35.32 -24981.89 | 30.06 -24930.52 | 37.90 -24891.26 | 33.64 -24870.89 | 32.24 |
| -25113.41 | 29.12 -25070.41 | 28.60 -25024.82 | 30.66 -24977.38 | 34.57 -24935.41 | 33.01 -24889.92 | 34.97 -24864.22 | 38.91 |
| -25113.24 | 29.29 -25069.60 | 29.41 -25026.38 | 29.10 -24979.00 | 32.95 -24929.19 | 39.23 -24882.39 | 42.50 -24865.56 | 37.57 |
| -25113.69 | 28.85 -25066.83 | 32.18 -25023.52 | 31.96 -24976.71 | 35.24 -24925.83 | 42.59 -24891.43 | 33.46 -24868.40 | 34.72 |
| -25114.15 | 28.38 -25066.83 | 32.18 -25019.08 | 36.40 -24978.18 | 33.77 -24935.40 | 33.02 -24889.71 | 35.18 -24870.23 | 32.90 |
| -25113.35 | 29.18 -25070.84 | 28.17 -25025.02 | 30.46 -24979.12 | 32.83 -24932.44 | 35.98 -24890.34 | 34.55 -24862.25 | 40.88 |
| -25114.41 | 28.12 -25069.90 | 29.10 -25020.26 | 35.21 -24978.19 | 33.76 -24940.26 | 28.16 -24887.48 | 37.41 -24871.64 | 31.49 |
| -25114.23 | 28.30 -25069.26 | 29.75 -25024.95 | 30.53 -24978.26 | 33.69 -24935.85 | 32.57 -24892.56 | 32.34 -24864.32 | 38.81 |
| -25113.28 | 29.25 -25068.23 | 30.78 -25024.44 | 31.04 -24979.75 | 32.20 -24933.87 | 34.55 -24892.45 | 32.44 -24871.97 | 31.16 |
| -25113.11 | 29.43 -25068.93 | 30.07 -25025.35 | 30.12 -24978.01 | 33.94 -24937.16 | 31.26 -24892.34 | 32.55 -24868.92 | 34.20 |
| -25113.24 | 29.30 -25067.81 | 31.19 -25021.96 | 33.52 -24978.25 | 33.70 -24932.77 | 35.65 -24893.45 | 31.45 -24866.22 | 36.91 |
| -25112.93 | 29.61 -25070.74 | 28.27 -25023.14 | 32.34 -24976.88 | 35.07 -24932.54 | 35.88 -24890.04 | 34.85 -24867.68 | 35.44 |
| -25114.89 | 27.65 -25069.48 | 29.52 -25022.93 | 32.54 -24978.28 | 33.67 -24936.01 | 32.41 -24887.36 | 37.54 -24868.66 | 34.46 |
| -25113.07 | 29.46 -25068.69 | 30.32 -25022.20 | 33.28 -24978.36 | 33.59 -24935.90 | 32.52 -24893.69 | 31.20 -24873.51 | 29.62 |
| -25114.10 | 28.44 -25070.11 | 28.90 -25024.77 | 30.71 -24979.35 | 32.60 -24938.98 | 29.44 -24893.17 | 31.72 -24867.14 | 35.99 |
| -25114.81 | 27.72 -25070.77 | 28.24 -25023.01 | 32.47 -24980.39 | 31.56 -24935.91 | 32.51 -24885.84 | 39.06 -24867.91 | 35.22 |
| -25113.67 | 28.86 -25068.58 | 30.43 -25021.77 | 33.71 -24978.83 | 33.12 -24936.17 | 32.25 -24893.62 | 31.27 -24867.37 | 35.76 |
| -25113.97 | 28.56 -25065.36 | 33.64 -25020.09 | 35.39 -24975.91 | 36.03 -24937.14 | 31.29 -24890.42 | 34.47 -24865.47 | 37.66 |
| -25114.40 | 28.13 -25068.76 | 30.24 -25024.73 | 30.75 -24974.90 | 37.05 -24933.06 | 35.36 -24890.54 | 34.36 -24861.84 | 41.28 |
| -25113.77 | 28.76 -25068.63 | 30.37 -25021.85 | 33.62 -24979.82 | 32.13 -24934.32 | 34.10 -24894.75 | 30.15 -24866.54 | 36.58 |
| -25114.78 | 27.75 -25067.76 | 31.24 -25024.01 | 31.47 -24978.79 | 33.16 -24937.07 | 31.35 -24892.20 | 32.69 -24864.77 | 38.36 |
| -25114.00 | 28.53 -25066.43 | 32.57 -25026.86 | 28.62 -24971.80 | 40.15 -24934.18 | 34.24 -24887.21 | 37.68 -24864.13 | 39.00 |
| -25115.22 | 27.31 -25069.34 | 29.66 -25023.97 | 31.51 -24976.55 | 35.40 -24938.08 | 30.34 -24889.94 | 34.95 -24868.25 | 34.88 |
| -25114.03 | 28.50 -25067.68 | 31.33 -25025.57 | 29.91 -24980.23 | 31.72 -24929.41 | 39.01 -24891.69 | 33.20 -24867.96 | 35.17 |
| -25114.45 | 28.08 -25067.89 | 31.12 -25019.70 | 35.78 -24982.76 | 29.18 -24931.56 | 36.86 -24893.20 | 31.69 -24866.35 | 36.78 |
| -25114.63 | 27.90 -25068.49 | 30.51 -25024.22 | 31.26 -24978.80 | 33.15 -24933.93 | 34.49 -24888.39 | 36.50 -24870.31 | 32.82 |
| -25113.43 | 29.10 -25070.58 | 28.42 -25022.45 | 33.03 -24978.74 | 33.21 -24933.24 | 35.18 -24883.45 | 41.44 -24869.91 | 33.21 |
| -25113.97 | 28.56 -25067.74 | 31.27 -25025.39 | 30.09 -24981.12 | 30.83 -24929.34 | 39.08 -24891.83 | 33.06 -24871.76 | 31.37 |
| -25113.74 | 28.79 -25068.71 | 30.30 -25023.76 | 31.71 -24974.36 | 37.59 -24932.30 | 36.12 -24890.40 | 34.49 -24866.90 | 36.23 |
| -25112.98 | 29.56 -25068.33 | 30.67 -25022.92 | 32.56 -24979.90 | 32.05 -24929.84 | 38.58 -24879.82 | 45.07 -24864.86 | 38.27 |
| -25114.14 | 28.40 -25068.96 | 30.04 -25024.54 | 30.94 -24980.53 | 31.42 -24936.12 | 32.30 -24890.19 | 34.70 -24868.53 | 34.60 |
| -25111.41 | 31.13 -25069.54 | 29.46 -25022.64 | 32.84 -24981.06 | 30.89 -24937.92 | 30.50 -24891.73 | 33.16 -24867.41 | 35.71 |
| -25114.85 | 27.68 -25068.74 | 30.26 -25022.53 | 32.94 -24983.17 | 28.78 -24934.67 | 33.75 -24891.03 | 33.86 -24862.83 | 40.30 |
| -25113.37 | 29.16 -25069.39 | 29.62 -25023.33 | 32.15 -24977.60 | 34.35 -24933.55 | 34.87 -24884.68 | 40.22 -24867.31 | 35.82 |
| -25113.90 | 28.64 -25070.39 | 28.61 -25022.02 | 33.46 -24979.64 | 32.31 -24935.65 | 32.77 -24887.29 | 37.60 -24865.34 | 37.78 |

|           |       |           |       |           |       |           |       |           |       |           |       |           |       |
|-----------|-------|-----------|-------|-----------|-------|-----------|-------|-----------|-------|-----------|-------|-----------|-------|
| -25113.42 | 29.11 | -25070.11 | 28.90 | -25025.27 | 30.20 | -24979.08 | 32.86 | -24931.29 | 37.13 | -24890.26 | 34.63 | -24866.27 | 36.86 |
| -25112.21 | 30.33 | -25070.27 | 28.74 | -25026.31 | 29.17 | -24978.85 | 33.09 | -24936.82 | 31.60 | -24892.86 | 32.04 | -24868.92 | 34.21 |
| -25113.44 | 29.09 | -25068.21 | 30.79 | -25024.95 | 30.53 | -24981.20 | 30.75 | -24931.68 | 36.74 | -24889.04 | 35.85 | -24865.82 | 37.31 |
| -25112.83 | 29.71 | -25067.16 | 31.84 | -25020.09 | 35.39 | -24978.92 | 33.03 | -24930.34 | 38.08 | -24888.74 | 36.15 | -24875.14 | 27.99 |
| -25113.67 | 28.86 | -25069.09 | 29.92 | -25026.27 | 29.21 | -24975.22 | 36.73 | -24932.04 | 36.38 | -24888.34 | 36.55 | -24868.78 | 34.35 |
| -25113.13 | 29.40 | -25072.05 | 26.96 | -25022.07 | 33.41 | -24981.51 | 30.44 | -24931.49 | 36.93 | -24883.53 | 41.36 | -24867.62 | 35.50 |
| -25111.88 | 30.65 | -25069.14 | 29.87 | -25023.33 | 32.15 | -24977.15 | 34.80 | -24932.22 | 36.20 | -24885.81 | 39.08 | -24867.78 | 35.35 |
| -25113.18 | 29.35 | -25069.52 | 29.49 | -25024.88 | 30.59 | -24980.88 | 31.07 | -24930.22 | 38.20 | -24891.23 | 33.66 | -24863.26 | 39.87 |
| -25115.38 | 27.15 | -25070.30 | 28.70 | -25024.03 | 31.45 | -24977.51 | 34.44 | -24936.60 | 31.82 | -24892.50 | 32.40 | -24871.53 | 31.59 |
| -25113.61 | 28.92 | -25070.66 | 28.35 | -25023.91 | 31.57 | -24979.63 | 32.31 | -24932.78 | 35.64 | -24889.04 | 35.86 | -24875.07 | 28.06 |
| -25112.13 | 30.40 | -25067.93 | 31.07 | -25025.17 | 30.31 | -24980.60 | 31.35 | -24936.11 | 32.31 | -24891.04 | 33.85 | -24870.71 | 32.42 |
| -25113.87 | 28.67 | -25069.77 | 29.24 | -25024.20 | 31.28 | -24982.84 | 29.11 | -24934.76 | 33.66 | -24889.42 | 35.47 | -24865.69 | 37.44 |
| -25114.54 | 27.99 | -25063.90 | 35.10 | -25021.87 | 33.60 | -24978.08 | 33.87 | -24937.43 | 30.99 | -24887.63 | 37.26 | -24862.99 | 40.13 |
| -25114.07 | 28.46 | -25069.46 | 29.54 | -25026.09 | 29.39 | -24977.21 | 34.74 | -24938.01 | 30.41 | -24889.82 | 35.07 | -24864.00 | 39.12 |
| -25112.00 | 30.54 | -25066.14 | 32.86 | -25024.45 | 31.02 | -24978.49 | 33.46 | -24933.15 | 35.27 | -24892.19 | 32.70 | -24867.49 | 35.64 |
| -25113.66 | 28.87 |           |       | -25025.75 | 29.73 | -24979.64 | 32.31 | -24932.35 | 36.07 |           |       | -24860.57 | 42.56 |
| -25113.49 | 29.04 |           |       | -25020.66 | 34.82 |           |       | -24936.39 | 32.03 |           |       | -24865.79 | 37.33 |
| -25115.06 | 27.48 |           |       |           |       |           |       | -24931.69 | 36.73 |           |       |           |       |
| -25113.65 | 28.89 |           |       |           |       |           |       | -24938.24 | 30.19 |           |       |           |       |
|           |       |           |       |           |       |           |       | -24931.34 | 37.08 |           |       |           |       |

Average energies

|          |         |          |          |          |          |          |          |          |          |          |          |          |          |
|----------|---------|----------|----------|----------|----------|----------|----------|----------|----------|----------|----------|----------|----------|
| -25113.8 | 28.6982 | -25068.8 | 30.17325 | -25023.6 | 31.88605 | -24978.4 | 33.50523 | -24933.6 | 34.85123 | -24889.3 | 35.63533 | -24866.9 | 36.20916 |
|----------|---------|----------|----------|----------|----------|----------|----------|----------|----------|----------|----------|----------|----------|

## U

concentration in solid solution (%)  
number of atoms

| ground state energy | solid solution energy |           |       |           |       |           |       |           |      |           |       |           |       |
|---------------------|-----------------------|-----------|-------|-----------|-------|-----------|-------|-----------|------|-----------|-------|-----------|-------|
|                     |                       | 3         | 6     | 9         | 12    | 15        | 18    | 21        |      |           |       |           |       |
|                     |                       | 2         | 4     | 6         | 8     | 10        | 12    | 13        |      |           |       |           |       |
| -25150.62           | -3.07                 | -25109.43 | -0.39 | -25067.32 | 3.21  | -25026.92 | 5.10  | -24992.47 | 1.04 | -24950.48 | 4.53  | -24928.66 | 7.09  |
| -25149.64           | -2.09                 | -25110.43 | -1.39 | -25069.95 | 0.59  | -25028.31 | 3.71  | -24989.32 | 4.19 | -24944.82 | 10.18 | -24928.49 | 7.26  |
| -25150.96           | -3.41                 | -25109.03 | 0.02  | -25069.77 | 0.76  | -25029.19 | 2.84  | -24987.74 | 5.77 | -24951.41 | 3.59  | -24927.82 | 7.93  |
| -25148.83           | -1.28                 | -25106.26 | 2.79  | -25068.44 | 2.09  | -25032.51 | -0.49 | -24989.99 | 3.53 | -24951.20 | 3.80  | -24932.63 | 3.12  |
| -25149.24           | -1.68                 | -25109.09 | -0.05 | -25063.63 | 6.90  | -25026.98 | 5.05  | -24985.35 | 8.17 | -24949.97 | 5.03  | -24928.05 | 7.70  |
| -25150.52           | -2.97                 | -25108.75 | 0.29  | -25070.29 | 0.25  | -25029.22 | 2.81  | -24990.66 | 2.86 | -24948.91 | 6.09  | -24925.28 | 10.47 |
| -25149.08           | -1.53                 | -25107.49 | 1.55  | -25071.53 | -0.99 | -25028.93 | 3.09  | -24986.78 | 6.74 | -24947.87 | 7.13  | -24923.60 | 12.15 |
| -25150.07           | -2.52                 | -25110.78 | -1.73 | -25069.09 | 1.44  | -25032.65 | -0.63 | -24989.38 | 4.14 | -24949.10 | 5.91  | -24927.71 | 8.04  |
| -25149.49           | -1.94                 | -25110.22 | -1.18 | -25061.05 | 9.49  | -25029.63 | 2.40  | -24985.88 | 7.63 | -24951.45 | 3.55  | -24926.48 | 9.27  |
| -25149.61           | -2.06                 | -25110.35 | -1.31 | -25068.15 | 2.38  | -25027.98 | 4.04  | -24988.13 | 5.38 | -24944.39 | 10.61 | -24925.54 | 10.21 |
| -25150.52           | -2.97                 | -25108.73 | 0.31  | -25069.78 | 0.76  | -25029.71 | 2.31  | -24990.11 | 3.41 | -24946.18 | 8.83  | -24933.38 | 2.37  |
| -25150.44           | -2.89                 | -25109.45 | -0.40 | -25069.06 | 1.48  | -25024.33 | 7.70  | -24990.60 | 2.92 | -24950.09 | 4.92  | -24930.88 | 4.87  |

|           |       |           |       |           |       |           |       |           |       |           |       |           |       |
|-----------|-------|-----------|-------|-----------|-------|-----------|-------|-----------|-------|-----------|-------|-----------|-------|
| -25149.40 | -1.85 | -25106.88 | 2.16  | -25068.17 | 2.37  | -25028.23 | 3.80  | -24990.15 | 3.37  | -24944.50 | 10.51 | -24931.62 | 4.13  |
| -25149.96 | -2.41 | -25109.16 | -0.12 | -25070.89 | -0.35 | -25029.35 | 2.67  | -24988.86 | 4.66  | -24946.21 | 8.79  | -24926.97 | 8.78  |
| -25148.64 | -1.09 | -25104.96 | 4.08  | -25071.14 | -0.60 | -25031.60 | 0.42  | -24989.30 | 4.22  | -24944.13 | 10.87 | -24929.42 | 6.33  |
| -25149.30 | -1.74 | -25110.50 | -1.45 | -25068.78 | 1.75  | -25027.50 | 4.52  | -24991.00 | 2.52  | -24947.27 | 7.74  | -24928.70 | 7.05  |
| -25150.80 | -3.25 | -25111.22 | -2.17 | -25068.49 | 2.05  | -25028.77 | 3.25  | -24990.36 | 3.15  | -24951.70 | 3.30  | -24919.52 | 16.23 |
| -25150.22 | -2.66 | -25110.89 | -1.84 | -25070.69 | -0.16 | -25031.01 | 1.01  | -24990.87 | 2.64  | -24949.66 | 5.35  | -24927.21 | 8.54  |
| -25150.74 | -3.19 | -25109.05 | -0.01 | -25069.19 | 1.35  | -25030.49 | 1.54  | -24987.98 | 5.53  | -24947.74 | 7.27  | -24925.87 | 9.88  |
| -25149.91 | -2.36 | -25109.97 | -0.93 | -25071.78 | -1.24 | -25030.18 | 1.84  | -24991.92 | 1.59  | -24949.70 | 5.31  | -24925.92 | 9.83  |
| -25149.13 | -1.58 | -25109.95 | -0.91 | -25069.89 | 0.64  | -25023.37 | 8.65  | -24987.08 | 6.43  | -24950.61 | 4.40  | -24928.87 | 6.88  |
| -25150.78 | -3.23 | -25109.25 | -0.21 | -25070.14 | 0.40  | -25028.30 | 3.73  | -24987.48 | 6.04  | -24951.40 | 3.60  | -24927.02 | 8.73  |
| -25150.22 | -2.66 | -25109.87 | -0.82 | -25069.89 | 0.65  | -25027.79 | 4.23  | -24989.12 | 4.39  | -24948.77 | 6.23  | -24931.54 | 4.21  |
| -25149.54 | -1.98 | -25109.85 | -0.81 | -25044.52 | 26.01 | -25029.98 | 2.05  | -24990.86 | 2.66  | -24944.67 | 10.34 | -24930.94 | 4.81  |
| -25149.94 | -2.39 | -25108.43 | 0.61  | -25071.04 | -0.51 | -25027.86 | 4.16  | -24993.03 | 0.48  | -24948.26 | 6.75  | -24933.78 | 1.97  |
| -25148.94 | -1.38 | -25109.21 | -0.17 | -25067.25 | 3.29  | -25030.19 | 1.84  | -24985.58 | 7.93  | -24951.80 | 3.20  | -24927.66 | 8.09  |
| -25150.61 | -3.06 | -25109.60 | -0.56 | -25068.76 | 1.77  | -25027.72 | 4.30  | -24987.93 | 5.59  | -24950.99 | 4.02  | -24930.49 | 5.26  |
| -25150.14 | -2.58 | -25111.95 | -2.91 | -25068.23 | 2.30  | -25026.87 | 5.15  | -24988.05 | 5.47  | -24952.52 | 2.49  | -24927.13 | 8.62  |
| -25150.15 | -2.60 | -25109.63 | -0.59 | -25070.26 | 0.27  | -25027.28 | 4.74  | -24990.70 | 2.81  | -24951.92 | 3.09  | -24934.34 | 1.41  |
| -25149.82 | -2.27 | -25102.60 | 6.44  | -25068.19 | 2.34  | -25029.74 | 2.29  | -24989.91 | 3.60  | -24950.40 | 4.61  | -24930.90 | 4.85  |
| -25149.47 | -1.91 | -25109.89 | -0.85 | -25069.73 | 0.80  | -25026.74 | 5.28  | -24992.36 | 1.16  | -24949.53 | 5.47  | -24929.28 | 6.47  |
| -25149.73 | -2.18 | -25108.34 | 0.70  | -25072.09 | -1.56 | -25031.15 | 0.87  | -24990.34 | 3.18  | -24948.67 | 6.33  | -24929.00 | 6.75  |
| -25150.28 | -2.73 | -25109.88 | -0.83 | -25068.64 | 1.90  | -25026.50 | 5.52  | -24990.84 | 2.67  | -24950.64 | 4.37  | -24934.52 | 1.23  |
| -25150.52 | -2.97 | -25109.25 | -0.21 | -25071.18 | -0.64 | -25028.63 | 3.40  | -24991.54 | 1.98  | -24950.76 | 4.24  | -24931.59 | 4.16  |
| -25150.80 | -3.25 | -25108.10 | 0.94  | -25070.42 | 0.11  | -25029.30 | 2.72  | -24992.96 | 0.56  | -24950.32 | 4.69  | -24929.63 | 6.12  |
| -25149.42 | -1.87 | -25109.01 | 0.04  | -25068.48 | 2.06  | -25030.83 | 1.19  | -24990.28 | 3.23  | -24951.78 | 3.22  | -24932.62 | 3.13  |
| -25150.70 | -3.15 | -25111.18 | -2.14 | -25072.88 | -2.35 | -25029.10 | 2.93  | -24992.14 | 1.37  | -24952.16 | 2.84  | -24928.73 | 7.02  |
| -25151.37 | -3.81 | -25108.23 | 0.81  | -25069.13 | 1.41  | -25029.76 | 2.26  | -24990.60 | 2.91  | -24952.13 | 2.87  | -24933.68 | 2.07  |
| -25149.16 | -1.61 | -25110.21 | -1.17 | -25069.72 | 0.81  | -25029.56 | 2.46  | -24988.01 | 5.50  | -24950.48 | 4.52  | -24931.08 | 4.67  |
| -25149.33 | -1.77 | -25110.83 | -1.78 | -25068.02 | 2.51  | -25029.71 | 2.31  | -24989.51 | 4.00  | -24944.36 | 10.65 | -24927.89 | 7.86  |
| -25149.78 | -2.23 | -25110.47 | -1.42 | -25067.99 | 2.54  | -25025.54 | 6.48  | -24983.00 | 10.52 | -24947.89 | 7.12  | -24929.96 | 5.79  |
| -25149.90 | -2.35 | -25111.09 | -2.04 | -25068.27 | 2.26  | -25027.25 | 4.77  | -24992.71 | 0.80  | -24950.70 | 4.30  | -24932.60 | 3.15  |
| -25150.33 | -2.78 | -25110.66 | -1.62 | -25071.38 | -0.84 | -25030.07 | 1.95  | -24985.32 | 8.19  | -24947.94 | 7.06  | -24928.12 | 7.63  |
| -25149.70 | -2.15 | -25109.04 | 0.00  | -25071.07 | -0.53 | -25030.25 | 1.78  | -24989.45 | 4.06  | -24952.68 | 2.33  | -24928.89 | 6.86  |
| -25149.85 | -2.30 | -25109.35 | -0.31 | -25067.68 | 2.86  | -25030.03 | 2.00  | -24980.10 | 13.41 | -24944.81 | 10.19 | -24932.30 | 3.45  |
| -25149.42 | -1.86 | -25106.69 | 2.36  | -25067.05 | 3.48  | -25032.39 | -0.36 | -24990.58 | 2.94  | -24948.08 | 6.92  | -24931.48 | 4.27  |
| -25149.39 | -1.83 | -25111.71 | -2.67 | -25070.32 | 0.21  | -25023.85 | 8.17  | -24987.40 | 6.11  | -24946.66 | 8.34  | -24931.54 | 4.21  |
| -25152.00 | -4.44 | -25110.16 | -1.11 | -25070.29 | 0.25  | -25022.90 | 9.13  | -24980.49 | 13.02 | -24952.29 | 2.72  | -24931.16 | 4.59  |
| -25150.58 | -3.03 | -25110.63 | -1.59 | -25072.58 | -2.05 | -25025.30 | 6.72  | -24990.28 | 3.23  | -24948.21 | 6.79  | -24928.23 | 7.52  |
| -25150.21 | -2.66 | -25107.76 | 1.29  | -25067.32 | 3.21  | -25011.33 | 20.70 | -24989.62 | 3.90  | -24946.21 | 8.79  | -24929.42 | 6.33  |
| -25149.30 | -1.75 | -25109.96 | -0.92 | -25067.94 | 2.59  | -25025.91 | 6.12  | -24988.64 | 4.87  | -24947.19 | 7.82  | -24932.99 | 2.76  |
| -25150.77 | -3.22 | -25106.89 | 2.15  | -25070.41 | 0.12  | -25023.93 | 8.09  | -24988.48 | 5.03  | -24952.58 | 2.43  | -24927.95 | 7.80  |
| -25150.15 | -2.60 | -25109.75 | -0.71 | -25068.37 | 2.16  | -25024.75 | 7.27  | -24989.94 | 3.58  | -24948.13 | 6.87  | -24931.86 | 3.89  |

|           |       |           |       |           |       |           |       |           |       |           |      |           |       |
|-----------|-------|-----------|-------|-----------|-------|-----------|-------|-----------|-------|-----------|------|-----------|-------|
| -25149.49 | -1.94 | -25106.81 | 2.23  | -25068.51 | 2.02  | -25029.50 | 2.52  | -24987.08 | 6.43  | -24949.79 | 5.21 | -24921.45 | 14.30 |
| -25148.55 | -0.99 | -25109.23 | -0.19 | -25070.77 | -0.24 | -25022.28 | 9.74  | -24980.63 | 12.89 | -24947.34 | 7.66 | -24928.85 | 6.90  |
| -25151.41 | -3.86 | -25108.70 | 0.34  | -25069.81 | 0.72  | -25028.89 | 3.13  | -24986.37 | 7.15  | -24950.17 | 4.84 | -24927.37 | 8.38  |
| -25150.58 | -3.03 | -25109.71 | -0.67 | -25069.52 | 1.01  | -25032.36 | -0.34 | -24986.96 | 6.55  | -24949.15 | 5.85 | -24929.18 | 6.57  |
| -25149.93 | -2.37 | -25109.75 | -0.71 | -25069.84 | 0.69  | -25029.69 | 2.33  | -24989.63 | 3.89  | -24952.26 | 2.74 | -24931.57 | 4.18  |
| -25151.06 | -3.51 | -25111.54 | -2.49 | -25066.55 | 3.98  | -25027.72 | 4.31  | -24990.38 | 3.13  | -24951.57 | 3.43 | -24931.33 | 4.42  |
| -25148.67 | -1.11 | -25110.11 | -1.07 | -25065.36 | 5.17  | -25030.98 | 1.04  | -24986.75 | 6.77  | -24947.54 | 7.47 | -24931.01 | 4.73  |
| -25149.36 | -1.80 | -25109.37 | -0.33 | -25069.27 | 1.26  | -25024.99 | 7.03  | -24984.29 | 9.22  | -24948.70 | 6.30 | -24931.46 | 4.29  |
| -25150.57 | -3.02 | -25110.65 | -1.61 | -25068.88 | 1.65  | -25030.23 | 1.79  | -24989.35 | 4.17  | -24946.03 | 8.97 | -24931.95 | 3.80  |
| -25149.77 | -2.22 | -25103.84 | 5.20  | -25062.33 | 8.20  | -25031.25 | 0.78  | -24989.23 | 4.29  | -24948.19 | 6.81 | -24926.21 | 9.54  |
| -25149.64 | -2.09 | -25110.97 | -1.92 | -25068.02 | 2.51  | -25028.69 | 3.34  | -24984.87 | 8.64  | -24950.16 | 4.85 | -24931.14 | 4.60  |
| -25149.81 | -2.26 | -25110.05 | -1.00 | -25068.48 | 2.06  | -25027.22 | 4.80  | -24987.98 | 5.53  | -24948.30 | 6.70 | -24929.31 | 6.44  |
| -25149.59 | -2.04 | -25107.88 | 1.16  | -25066.66 | 3.87  | -25027.42 | 4.60  | -24990.72 | 2.80  | -24949.23 | 5.77 | -24928.45 | 7.30  |
| -25149.79 | -2.24 | -25110.79 | -1.75 | -25069.59 | 0.94  | -25030.24 | 1.78  | -24989.45 | 4.06  | -24954.49 | 0.52 | -24933.86 | 1.89  |
| -25150.53 | -2.98 | -25111.90 | -2.86 | -25070.56 | -0.03 | -25030.87 | 1.15  | -24990.06 | 3.45  | -24949.66 | 5.35 | -24931.02 | 4.73  |
| -25149.95 | -2.40 | -25110.36 | -1.32 | -25067.76 | 2.77  | -25026.00 | 6.02  | -24990.09 | 3.43  | -24951.21 | 3.80 | -24928.47 | 7.27  |
| -25147.36 | 0.19  | -25107.73 | 1.32  | -25069.18 | 1.35  |           |       | -24990.78 | 2.73  | -24950.10 | 4.91 | -24930.26 | 5.49  |
| -25150.09 | -2.54 | -25110.10 | -1.06 | -25067.67 | 2.86  |           |       | -24990.48 | 3.04  | -24950.11 | 4.89 | -24927.71 | 8.04  |
| -25142.71 | 4.84  | -25107.60 | 1.44  | -25070.24 | 0.29  |           |       | -24988.86 | 4.66  | -24951.74 | 3.26 | -24930.82 | 4.93  |
| -25150.08 | -2.53 | -25111.64 | -2.59 | -25069.62 | 0.92  |           |       | -24988.62 | 4.90  | -24954.26 | 0.75 | -24927.10 | 8.65  |
| -25150.02 | -2.46 | -25106.57 | 2.47  | -25062.89 | 7.64  |           |       | -24987.26 | 6.26  | -24951.76 | 3.24 | -24927.68 | 8.07  |
| -25150.37 | -2.82 | -25109.64 | -0.60 | -25070.77 | -0.24 |           |       | -24989.98 | 3.54  | -24950.44 | 4.57 |           |       |
| -25149.61 | -2.06 | -25109.00 | 0.04  | -25068.33 | 2.20  |           |       | -24990.36 | 3.15  | -24950.94 | 4.06 |           |       |
| -25147.68 | -0.12 |           |       | -25067.40 | 3.14  |           |       | -24987.82 | 5.69  | -24947.27 | 7.73 |           |       |
| -25150.78 | -3.22 |           |       | -25071.01 | -0.48 |           |       | -24992.13 | 1.38  | -24951.81 | 3.20 |           |       |
| -25148.33 | -0.78 |           |       |           |       |           |       | -24989.52 | 3.99  |           |      |           |       |
| -25148.88 | -1.33 |           |       |           |       |           |       | -24989.94 | 3.57  |           |      |           |       |
| -25149.93 | -2.38 |           |       |           |       |           |       | -24987.96 | 5.55  |           |      |           |       |
| -25150.96 | -3.41 |           |       |           |       |           |       |           |       |           |      |           |       |
| -25151.11 | -3.56 |           |       |           |       |           |       |           |       |           |      |           |       |
| -25149.43 | -1.88 |           |       |           |       |           |       |           |       |           |      |           |       |

Average energies      -25149.83      -2.27      -25109.29      -0.25      -25068.66      1.88      -25028.20      3.82      -24988.87      4.64      -24949.42      5.59      -24929.42      6.33

**Calculated ground state energies for the  
reactants and products used in the  
calculations for the solid solution energy**

| <b>Material</b>                    | <b>Calculated ground state energy<br/>(eV)</b> |
|------------------------------------|------------------------------------------------|
| CeO <sub>2</sub>                   | -105.15                                        |
| PuO <sub>2</sub>                   | -102.15                                        |
| ThO <sub>2</sub>                   | -104.97                                        |
| UO <sub>2</sub>                    | -106.52                                        |
| Al <sub>2</sub> O <sub>3</sub>     | -157.59                                        |
| Fe <sub>2</sub> O <sub>3</sub>     | -152.34                                        |
| TiO <sub>2</sub> (rutile)          | -120.74                                        |
| CaTiO <sub>3</sub>                 | -158.33                                        |
| ZrCaTi <sub>2</sub> O <sub>7</sub> | -3148.26                                       |

Each ground state energy was multiplied to agree with the amount of atoms being replaced in the simulation cell and to agree with the amount of atoms in the cell
